# Supplementary material for: The Genome-Wide Characterization of Alternative Splicing and RNA Editing in the Development of Coprinopsis cinerea
Source: J Fungi (Basel). 2023 Sep 9;9(9):915. doi: 10.3390/jof9090915 (PMC10532568; doi:10.3390/jof9090915)
Supplement: Supplementary file 1 [file jof-09-00915-s001.zip]

Archive with 7 entries (7 files):
- DatasetS1_gene_count_log2TMMmatrix.xlsx
- DatasetS2_Alternative_splicing.exp5.minor05.jad6.psi.xlsx
- DatasetS3_Alternative_splicing.exp5.minor05.jad6.feature.xlsx
- DatasetS4_RNA_editing.editing_level.xlsx
- DatasetS5_RNA_editing.feature.xlsx
- DatasetS6_full_genome_alignment_of_Muraguchi2015_against_Xie2021.xlsx
- Posttranscriptional_figuretable_v3.pdf
