# Supplementary material for: The Genome-Wide Characterization of Alternative Splicing and RNA Editing in the Development of Coprinopsis cinerea
Source: J Fungi (Basel). 2023 Sep 9;9(9):915. doi: 10.3390/jof9090915 (PMC10532568; doi:10.3390/jof9090915)
Supplement: Supplementary file 1 [file jof-09-00915-s001.zip › DatasetS1_gene_count_log2TMMmatrix.xlsx]

## Sheet: gene_count_log2TMMmatrix
	BS1	BS2	BS3	BS12h1	BS12h2	BS12h3	BS24h1	BS24h2	BS24h3	Myc1	Myc2	Myc3	Oidia1	Oidia2	Oidia3	Scl1	Scl2	Scl3	Knot1	Knot2	Knot3	Pri1	Pri2	Pri3	YFB1	YFB2	YFB3
CC2G_000017	6.25137	5.97505	6.16983	6.0835	6.53069	6.44986	7.30348	7.12232	5.50048	5.51089	5.53967	5.43299	5.96712	6.16067	5.6008	5.15069	5.27517	4.70329	5.61048	5.29594	5.22125	5.47621	5.45615	5.43338	7.05131	6.68445	7.02443
CC2G_000018	4.15108	3.8425	3.8068	6.4294	7.98739	7.4361	2.87652	3.07823	6.81242	6.86945	6.72946	7.02974	7.43342	8.24536	7.31785	9.32674	9.20921	8.47395	8.21966	8.55017	8.74898	6.08823	6.14331	6.16839	9.80375	9.58209	10.016
CC2G_000019	0.279274	0.851145	1.68643	0	2.87796	2.49	0.573356	0.732788	1.72235	0.712044	0.818903	0.858186	0.581914	0.365566	0.546854	1.69583	1.98847	1.98203	1.44347	1.42711	1.54744	0.719702	1.31683	1.01003	0.856533	0.855326	1.08035
CC2G_000020	5.20067	5.93769	5.6746	5.57802	5.44467	6.52413	6.32581	6.2376	5.38117	5.08014	4.76535	4.87696	4.96382	4.86811	5.11459	4.25819	4.46677	4.59779	5.035	5.04297	4.96009	4.3001	4.56753	4.20142	4.21974	4.84875	4.50997
CC2G_000023	0.279274	1.29106	0	0	0	1.86343	0	0.732788	1.36797	0.994679	1.10171	1.24819	1.09944	0.8993	0.942453	0.523062	0	0.222816	0.617031	0.585414	0.60829	0.719702	1.02315	0.565884	1.39032	1.44333	1.3902
CC2G_000032	2.88899	3.80979	4.12772	0	2.7476	2.30978	1.78237	1.86687	6.28882	4.56614	4.98512	5.11419	4.65226	4.32849	4.2195	5.78486	5.58962	6.03512	5.48429	5.87938	5.63224	4.49328	4.27875	4.78814	8.60367	8.53328	8.79106
CC2G_000029	7.19952	7.31918	7.27496	5.03282	5.60387	5.61932	5.85627	6.04497	6.65259	6.93946	7.26503	7.18409	7.30831	7.0932	6.92988	6.5865	6.45133	6.52997	7.37639	7.14153	7.15938	7.26686	7.3372	7.40812	7.68722	7.73335	7.71026
CC2G_000021	2.33859	2.92453	3.79037	8.03107	8.32685	7.92933	9.84961	9.97705	8.42846	9.07151	9.17882	9.27294	9.04274	9.14394	9.20956	9.78078	9.94516	10.0087	9.0538	9.2633	9.31459	6.30759	6.21635	6.31291	6.15226	5.72762	6.18259
CC2G_000022	0	0.71646	0	2.11792	1.18283	0	0.573356	0	1.84286	1.8853	1.39905	1.80768	1.03094	1.10671	1.21728	1.45839	1.47057	1.89833	1.80351	1.97829	2.29403	3.32995	3.24614	3.27778	3.5157	3.75938	3.73999
CC2G_000033	6.90905	7.14165	7.16933	4.60791	4.7227	5.00023	4.84874	4.77128	5.2236	5.23755	5.76922	5.78345	5.85518	5.7411	5.66282	5.50842	5.41123	5.46233	6.29039	6.29596	6.07283	6.11907	6.30587	6.42019	6.68571	6.77518	6.89531
CC2G_000034	4.84629	5.51408	5.54349	3.22523	3.1079	3.53043	2.8442	3.31251	3.28803	4.07743	4.30554	4.1603	4.43751	4.32434	4.28918	3.06599	2.81395	3.16362	4.26346	4.1098	3.80681	4.49328	4.52863	4.45765	5.12292	4.87882	5.04074
CC2G_000045	0.617261	1.19301	0	2.11792	0	0	4.04025	3.18708	3.75541	3.29159	2.71518	3.47615	4.47345	4.41685	3.34487	3.53572	3.19949	3.90966	3.58858	3.40211	3.29265	1.23419	1.0633	0.666326	4.27364	3.51324	4.21956
CC2G_000039	1.12082	2.28062	1.94579	2.11792	2.26623	0	1.20244	1.79989	5.57633	5.78765	6.03602	5.87697	5.81373	5.80202	5.94099	5.28004	5.12888	5.55749	5.58753	5.92614	5.75252	2.74502	2.3907	2.65151	2.50116	2.30588	2.36575
CC2G_000040	0	0.567895	0	0	2.26623	0	2.5153	2.21418	4.17826	4.54876	5.05073	4.75866	4.85162	4.26499	4.52044	4.27863	4.23701	4.52291	3.44671	3.89001	3.73286	2.98893	2.49712	2.68781	4.08839	3.8633	3.86564
CC2G_000041	2.66439	4.38802	4.37913	0	0	0	0	0	2.78515	1.141	1.62007	1.3222	0.995425	0.489277	0.758171	0.576887	0.859054	0.785514	0.918025	1.13002	1.26215	2.23408	1.97269	2.36808	6.1928	6.06058	6.09335
CC2G_000042	0.513155	0.974322	0.964086	0	0	1.21373	0.723026	0.581482	2.19955	1.73976	2.18506	2.12964	2.1628	2.17579	1.84501	1.71995	1.44543	1.61343	1.62085	1.70138	1.9685	1.46682	1.28322	1.40836	1.14797	0.684258	0.773369
CC2G_000043	1.37955	2.65671	2.90637	0	2.26623	1.86343	2.38658	2.79839	5.22914	5.03717	5.27064	5.28585	4.88596	4.95919	4.82021	4.24993	4.15797	4.37593	4.89824	5.1046	4.96548	4.83391	4.84305	4.99785	2.86449	3.26264	2.78172
CC2G_000049	0	0.71646	0	2.11792	1.18283	0	0	0	5.33568	4.3118	4.22783	5.06653	4.14516	3.98396	4.31446	6.32761	6.42906	5.92178	5.24358	5.30053	5.53224	1.12173	0.850352	1.25551	2.24775	1.59594	2.04998
CC2G_000048	8.15678	7.60665	7.64186	7.28856	7.00738	6.83043	9.91452	9.9673	6.79758	7.92349	7.62272	7.4998	7.55351	7.85474	7.70044	6.83314	7.52709	7.45507	7.18506	7.08083	7.18098	7.72343	7.83146	7.91473	6.13988	6.67449	5.78149
CC2G_000052	2.27635	3.99577	3.65173	0	0	0	0	0	1.44615	0.831819	0.726755	0.322019	1.13251	1.28802	0.708172	0.285108	0	0.474761	0.617031	0.700961	0.764914	0	0.156663	0.214247	1.54862	1.00824	1.27412
CC2G_000050	7.00573	7.21531	7.27201	7.20935	8.17027	8.15645	6.70894	6.92822	7.45999	6.65985	6.52835	6.68783	6.61956	6.63932	6.87287	7.6704	7.73038	7.98023	7.15476	7.19179	7.34561	2.04145	2.70174	1.91649	5.50736	5.77636	5.92312
CC2G_000051	0.279274	0.71646	0.841857	4.00298	4.57676	4.33133	1.47988	1.79989	2.81492	2.52368	2.03943	2.19018	2.01103	2.31607	2.65542	1.83487	1.19697	2.17223	2.09139	2.19088	2.32792	0.667246	0.705653	0.931472	0.773445	0	0
CC2G_000053	5.68386	4.79967	4.92206	5.89389	5.62258	6.0367	6.77899	6.79483	5.72487	6.33313	6.34485	5.99763	6.44955	6.35921	6.18556	5.4609	5.43537	5.34669	6.14926	5.95262	5.70818	6.55501	6.74748	6.52088	6.34443	6.26983	6.46334
CC2G_000054	0	0.402256	0.397192	0	0	0	0	0	0.517227	0	0	0.0874897	0.136673	0	0.299184	0	0	0	0.307087	0	0	0.956697	0.895531	0.400752	3.50286	1.89954	2.64818
CC2G_000056	0	0.71646	0	3.46232	1.5387	1.86343	0.573356	0.581482	3.44859	2.86994	2.39422	2.89521	2.19447	2.26505	1.95628	3.6718	3.60342	3.60098	2.84145	3.28662	3.26668	0.956697	1.14039	0.890529	3.47684	2.99622	3.39565
CC2G_000057	0	0	0	0	0	0	0	0	1.44615	1.85734	1.85585	2.00034	1.45361	1.21821	2.50248	0.576887	0.416963	1.22409	1.34588	1.52445	1.33061	2.32154	2.52614	2.30716	1.27423	1.93813	1.49764
CC2G_000058	0	0.71646	1.07676	3.22523	0.709386	3.35552	0.573356	0	5.02138	3.09012	2.4814	3.83963	2.4255	2.33268	2.15598	5.78914	5.20575	5.08088	4.43938	4.8342	4.78514	0.304762	0.755516	0.616978	1.08044	0.382322	1.00951
CC2G_000059	4.85696	5.07897	4.98116	3.66589	3.1079	3.04553	4.21469	4.23801	3.3091	2.54136	3.12925	3.13996	3.29189	3.08713	3.19864	4.97139	4.89123	4.49824	3.96786	4.53268	4.1429	5.23399	5.21683	5.29511	5.74397	5.91824	5.60051
CC2G_000060	8.06426	8.85518	8.81615	5.72193	6.56012	6.5033	3.95203	3.78037	5.39602	5.32691	5.02678	5.03662	5.58796	5.76883	5.39892	6.32073	6.32436	6.01166	6.14201	6.32552	6.21316	5.24074	5.252	5.42444	6.15021	6.25463	6.47817
CC2G_000061	7.51381	7.6361	7.48862	2.58761	4.45671	5.08679	3.38326	3.28828	4.4772	4.4113	4.30554	4.524	4.5022	4.69581	4.19702	4.11089	4.08252	3.76356	4.52734	4.64516	4.58252	5.13607	5.29689	5.23301	5.12711	5.01141	5.42109
CC2G_000062	5.23789	5.1784	5.24503	0	0	2.1038	0	0	2.55752	2.09137	1.96071	2.28577	2.21004	1.89174	1.99849	2.56469	2.34177	2.30817	2.4767	2.44405	2.39338	1.61265	2.20578	1.85397	2.50116	1.77716	2.44842
CC2G_000070	0	0.402256	0	2.11792	0	0	0	0.412428	0	0.648208	0.628317	0.523701	0.430589	0.365566	0.428327	0.285108	0.309604	0	0	0	0.232436	0.819218	0.297968	0.616978	1.27423	1.44333	0.935008
CC2G_000071	0	0	0	0	0	0	1.91274	1.40851	0.897165	0.831819	0.86286	0.755073	0.761768	0.853982	0.428327	0.348376	0.252771	0.415779	0.617031	0.644344	0.159041	0.371859	0.363748	0.214247	0	0.382322	0.685209
CC2G_000072	0	0	0	0	0	0	1.09668	0.412428	4.89466	2.99067	2.71518	3.2672	2.85008	3.91943	3.45508	4.78387	4.84151	4.32474	4.49735	4.34114	4.71645	0.667246	0.600438	0.666326	1.94012	1.59594	1.64513
CC2G_000063	1.37955	2.01968	1.45585	0	2.06196	0	0	0.581482	4.92228	3.35295	3.64565	3.83331	2.94622	2.86529	2.80563	4.5716	4.30847	4.35645	3.64438	3.73596	3.93876	1.99964	1.95146	2.07106	5.51057	5.75219	5.62442
CC2G_000064	0	1.38287	0.212222	2.11792	1.18283	0	0.21743	0	2.6263	1.23091	1.89871	1.97762	1.55466	1.25354	1.32072	2.28641	2.21362	1.53245	1.72804	1.80832	1.87991	0.999758	0.544805	0.890529	3.52843	3.39338	3.06979
CC2G_000065	2.48338	2.98437	3.02347	4.00298	4.27933	2.65018	2.81115	3.07823	6.17576	8.81727	8.64269	9.01273	8.70184	8.58748	9.07116	6.2858	6.18512	5.64996	7.63798	7.99641	7.6468	5.94135	5.82647	5.59979	3.23432	2.84195	3.62622
CC2G_000066	1.04818	1.29106	0.561119	2.58761	1.82392	0	0.982555	0.994777	3.91513	5.46993	5.58466	6.05302	5.82894	5.58344	5.83723	3.52891	3.57472	3.03235	4.50867	4.54819	4.36314	2.9782	2.89211	2.9293	1.49776	0.382322	1.08035
CC2G_000067	10.3337	10.4307	10.3143	9.5136	9.02556	8.96688	12.1066	12.141	8.09701	9.13219	8.97595	9.08194	9.30713	9.32103	9.33197	8.83522	9.03373	8.81192	8.75014	8.7866	8.69483	8.56198	8.63931	8.56683	7.4335	7.98273	7.08598
CC2G_000068	10.4011	11.9272	11.8	9.29319	10.2946	9.89721	6.29625	6.11897	8.17083	6.85803	5.5565	6.65419	7.03366	8.05699	7.05329	9.51278	9.48938	9.47689	9.61213	9.54583	9.38455	1.46682	1.41318	1.34915	1.73583	1.77716	2.2476
CC2G_000069	0	0	0.708306	0	0	1.57485	1.84902	1.65581	2.8441	3.65043	3.68903	3.47615	4.33114	3.53044	4.09371	1.98177	2.08929	2.60073	3.56709	3.82781	3.96591	2.70654	3.03018	3.0364	3.85575	3.98809	4.09679
CC2G_000073	0.714357	2.37308	1.61359	0	0	0	0.21743	0	5.04041	4.57903	4.42765	4.77852	4.35935	4.25195	4.3758	4.66154	4.68921	4.6909	4.7084	4.88089	4.85942	1.61265	1.6425	1.67265	1.27423	1.14649	1.44492
CC2G_000074	0.617261	1.38287	1.37	0	0	0	0.406341	0.581482	1.19762	1.82883	1.9808	2.02271	1.67178	1.47923	1.74936	1.42942	1.256	1.29126	1.94354	1.52445	1.73591	0.371859	0.850352	0.512912	0.38295	0	0.266211
CC2G_000075	2.66439	3.20165	3.39345	2.11792	1.5387	0	0.573356	0.869721	2.78515	2.6755	2.21928	2.67281	2.4255	2.19409	2.33137	2.365	2.25761	2.53296	2.75537	2.70159	2.83159	1.99964	2.09394	1.95671	1.39032	1.44333	1.5485
CC2G_000076	3.8103	2.07578	2.5246	5.03282	4.18173	4.62927	5.1224	5.57972	4.9291	5.28816	5.21449	5.12715	5.32377	5.31112	5.34677	5.04485	4.63187	4.88822	4.87219	4.9082	4.85071	6.18119	6.23624	6.07212	5.36917	5.82865	5.30387
CC2G_000077	0	0.567895	1.27872	0	0	0	0	0	2.6263	5.60427	5.28484	5.15019	4.29873	4.32849	4.13214	1.62094	1.84204	1.66499	3.97876	3.76944	4.1989	0.719702	0.654004	0.760228	0.591369	0.684258	1.08035
CC2G_000078	2.03456	1.96131	1.37	2.58761	1.82392	1.21373	0.982555	0.732788	5.63175	5.68403	5.49148	6.14511	4.99112	5.15873	4.94147	6.29084	6.2708	6.12532	5.9547	6.23256	6.33271	2.32154	2.3907	2.36808	3.1708	2.77957	2.44842
CC2G_000079	6.39742	7.10674	7.12907	8.72084	8.8619	8.66315	5.0534	5.29965	7.35876	5.57237	5.97974	7.08659	5.78672	6.32641	6.18556	9.56979	9.51707	8.87913	7.13967	8.25372	8.01177	5.32992	5.52245	5.3918	7.97964	8.21163	8.12007
CC2G_000080	2.48338	2.76305	3.10545	4.14595	4.02171	4.01549	1.30097	0.994777	2.90073	1.09386	1.51379	2.57024	1.55466	1.77503	1.77387	4.78673	4.71836	4.14121	2.79289	3.28662	3.47003	1.52693	1.5035	1.49285	3.64987	3.78077	3.79368
CC2G_000084	0	0	0	2.11792	0	0	0	0	0.897165	0.191317	0.149457	0.248	0.136673	0.0808996	0	0.285108	0.364282	0.222816	0.236223	0	0.302278	0	0	0.146306	0	0.265787	0
CC2G_000085	0	0.215102	0	0	0	0	0	0.220902	1.00442	0.360207	0.218754	0.644021	0.200442	0.230242	0	0.576887	1.03788	0.638488	0.872021	0.523974	0.60829	0	0	0.0750068	0	0	0
CC2G_000083	3.11919	4.79132	4.77951	3.22523	1.82392	2.1038	3.55282	3.69078	4.8665	4.14837	4.71827	4.94296	4.23925	4.51109	4.60484	5.79341	5.5694	5.57949	4.87802	5.24211	5.36485	5.61942	5.67113	5.73458	6.13573	6.48712	6.20456
CC2G_000081	0.890903	1.46918	1.27872	0	2.44513	2.30978	0.858618	0.732788	5.69315	6.92185	6.4295	6.44857	5.16701	6.11937	5.21199	5.36854	5.42254	5.18168	5.90987	5.75455	6.02845	1.12173	1.28322	0.848389	6.91984	6.6887	6.72751
CC2G_000082	7.5684	8.13654	8.24866	6.48427	6.35153	7.02567	5.45219	5.35319	6.10523	6.1173	6.0704	6.09585	5.84149	6.0545	5.58704	6.43444	6.26003	5.89233	6.51655	6.79576	6.80897	4.22949	4.76304	4.40774	5.17646	5.3198	5.1477
CC2G_000086	1.8757	0	0	4.27603	2.44513	3.89271	4.98836	5.00481	4.11983	4.33733	4.24455	4.15018	4.16127	3.83449	3.79754	3.56265	3.76962	4.53335	3.03131	3.15095	3.56543	0.304762	0.654004	0.565884	0	0.684258	0.382908
CC2G_000087	0.971684	2.89364	2.48431	0	1.18283	0	0	0.732788	1.44615	2.22864	2.15	1.90723	1.84138	1.62124	2.17451	1.69583	1.80299	2.29186	1.34588	1.90788	1.78553	1.79484	1.79334	1.81073	2.39399	1.59594	2.62467
CC2G_000088	4.11596	4.14745	3.75694	2.11792	3.1079	3.53043	3.79183	3.38285	4.65233	5.11303	5.15164	5.09848	5.157	4.97515	4.84065	5.17489	5.28228	5.11835	4.53474	4.50909	4.48076	4.98085	4.96198	4.93128	4.79455	4.49468	4.62699
CC2G_000089	0.714357	1.19301	1.07676	0	2.26623	2.65018	0.406341	0.220902	1.59085	1.82883	1.81168	2.22918	1.55466	1.53772	1.41725	2.33407	2.02286	1.7629	1.70198	1.72887	1.87991	0	0.229045	0.279131	0	0.265787	0.490867
CC2G_000093	0	0	0	2.11792	1.5387	0	0.858618	0.994777	5.50048	5.39169	6.25389	6.40666	6.0974	5.41814	5.74261	4.19074	4.8654	4.45129	4.59262	5.13831	4.55774	0.234393	1.02315	0.760228	0.685278	0	0
CC2G_000090	9.58693	9.36153	9.71334	9.16472	9.16138	9.30751	8.47477	8.63702	8.74206	8.44205	8.41251	8.40267	8.47448	8.4381	8.55037	9.6314	9.23992	9.38798	8.26959	8.68676	8.50725	7.79087	7.4437	7.69008	9.18527	9.03711	9.20652
CC2G_000091	1.49337	0.974322	0.708306	1.41702	1.18283	1.21373	0.573356	0.412428	1.19762	1.27385	1.4286	1.42655	1.03094	0.853982	1.0667	1.36968	1.47057	1.47583	1.56411	1.80832	1.94686	1.19767	1.10236	1.34915	2.47511	2.49894	2.33711
CC2G_000092	3.54587	3.01339	3.10545	4.60791	4.85523	4.87609	5.04632	4.89677	6.52556	7.33052	7.04897	6.97056	6.38669	6.57793	6.29122	6.17564	6.7921	6.8217	6.75066	7.2879	7.47079	4.41987	4.46636	4.8212	5.60069	5.50472	5.56081
CC2G_000097	4.29929	3.51742	3.68766	0	1.5387	1.86343	1.91274	1.86687	3.24493	2.86994	2.62871	2.78175	2.4255	2.66993	2.91987	4.11089	3.70754	4.37593	3.80602	3.95546	4.18047	7.80004	7.86521	7.92806	7.97674	8.55749	8.51115
CC2G_000094	5.42164	5.83984	5.83939	5.30077	5.48615	5.14174	4.42594	4.47113	5.95955	6.52083	6.22682	6.3602	5.90627	6.23767	5.85457	6.3529	6.33637	6.30264	6.05975	6.03062	6.24786	4.75442	4.84017	4.92369	6.58118	6.65869	6.57641
CC2G_000095	0.805329	0	0	0	1.82392	2.9254	2.81115	3.16063	3.41009	2.62665	3.3538	3.5318	3.23973	3.227	3.61964	3.91584	4.11477	4.32073	4.48211	4.73262	5.05165	2.83098	2.7761	2.78036	2.11905	1.68939	2.08485
CC2G_000098	8.47174	8.20417	8.23507	7.97471	7.68303	7.89376	9.49925	9.57294	7.56446	8.17531	8.01457	7.93562	8.21511	8.35464	8.09664	7.54267	7.87919	7.8418	7.72506	7.5254	7.6447	8.06719	7.98533	8.05999	8.25557	7.57554	8.18379
CC2G_000100	0.279274	0.402256	0.561119	4.14595	5.11523	5.2706	6.10154	6.11553	3.6602	3.39245	3.68903	2.79481	4.72182	3.98921	4.80839	2.52416	1.54346	2.35602	1.08864	1.35838	1.78553	1.46682	1.69455	1.37905	1.59775	2.11697	2.18469
CC2G_000099	6.7888	6.80246	6.66942	6.0835	6.05346	6.33667	6.95197	6.78404	5.95287	6.32167	6.36027	6.22807	6.25868	6.15016	6.47904	4.88868	5.23171	5.3933	5.99416	5.80061	5.97331	5.36328	5.47301	5.4546	5.92571	5.61304	6.50256
CC2G_000101	0.971684	0.71646	1.18127	2.58761	3.39597	3.04553	0	0.581482	3.6602	1.77006	1.9808	2.30414	1.75907	1.59393	1.95628	3.91584	3.70224	4.05203	2.27936	2.82134	2.84336	2.86632	3.27207	3.04575	6.19679	6.11844	6.52971
CC2G_000102	2.90964	3.4124	3.93191	4.14595	5.21727	5.43361	2.03229	1.93087	5.87375	4.90344	5.09287	5.23406	4.9313	4.67641	4.95225	6.61331	6.59614	6.71489	6.04038	6.19363	6.08651	7.18993	7.38154	7.22623	9.34036	9.19955	9.46166
CC2G_000103	8.6067	11.4982	11.5962	8.32959	9.13717	8.96497	6.39437	6.27199	7.82531	7.43648	7.20226	7.56556	6.71475	7.24737	7.02357	9.16441	9.35102	9.30293	8.21995	8.16248	8.49262	6.3172	6.62792	6.4416	6.00525	6.41028	5.88405
CC2G_000105	0.400949	0	0	0	0	0	0.982555	0.994777	5.14374	5.89641	5.68907	5.60222	4.69993	5.16338	5.1478	3.45178	4.46364	3.83283	4.95451	4.76949	4.90503	1.49719	1.44392	1.67265	4.04477	4.20141	3.95318
CC2G_000106	0.714357	1.55062	1.37	4.87754	5.83009	5.477	2.5153	2.26472	6.40838	6.40249	6.46648	6.58729	5.91817	5.71915	5.57139	6.45883	6.31831	6.18394	6.01812	6.26578	6.19949	1.81908	1.9299	1.85397	0.685278	0.772326	0.685209
CC2G_000107	5.13641	5.50389	5.53858	6.11861	6.55037	6.49277	8.06481	8.15782	6.00546	6.05559	6.00938	6.23167	6.4561	6.63095	6.72357	6.22494	5.77257	5.67847	6.08895	6.28674	6.12315	5.39789	5.45803	5.3973	4.82581	4.71069	4.69629
CC2G_000108	2.63988	1.62771	1.37	5.30077	5.69512	5.477	3.64949	3.89712	5.00855	4.70203	5.34807	5.29965	6.0244	5.84753	5.70167	5.20725	5.45282	5.14357	5.49381	5.62886	6.23676	5.56312	5.52065	5.53484	5.93769	6.11423	5.78414
CC2G_000109	2.03456	2.23207	1.94579	5.6276	5.46556	5.08679	3.29037	3.78037	4.85222	5.46067	5.83276	5.827	6.69828	6.16647	6.1462	5.11702	5.113	5.00787	5.85179	6.15108	6.6681	5.86771	5.80887	5.72005	6.08494	6.15576	5.83624
CC2G_000110	0.890903	2.18183	1.75577	2.11792	0	0	0	0	2.55752	3.00349	2.81925	3.16028	3.00989	3.13528	3.43217	2.34962	1.84204	2.86605	3.10276	3.12014	2.74646	2.64005	2.85827	2.41214	3.71811	3.3511	3.88556
CC2G_000111	0.617261	0.974322	0.561119	0	0	1.57485	1.71248	1.57799	4.41051	5.99272	6.27844	6.18284	6.71134	6.58141	6.6576	5.54432	5.48247	5.4605	6.35348	6.51605	6.52937	5.79165	5.95874	6.02324	8.30586	8.36201	8.44138
CC2G_000112	0.714357	1.19301	1.27872	0	0	0	1.20244	1.10985	5.18991	6.87294	6.84698	6.73516	4.90523	4.49273	4.20605	3.11229	3.80958	3.58098	4.50867	4.43592	4.33425	1.49719	1.38177	1.72016	1.39032	1.49602	2.01424
CC2G_000114	7.86124	8.21201	8.2938	5.76688	5.89312	5.71301	6.00983	6.08068	5.28871	5.49283	5.62191	5.50824	5.66768	5.40248	5.73794	5.73542	5.71588	5.77403	4.95175	5.13574	4.87383	7.10435	7.11825	7.19609	7.79054	7.49936	8.05999
CC2G_000115	0	0.71646	0.841857	2.94136	2.06196	1.21373	0.21743	0.412428	0.517227	1.18666	2.09578	1.88298	2.08046	1.50877	2.17451	0.218937	0.610329	0.638488	0.236223	0.322199	0.302278	0.160414	0	0.0750068	0.139254	0	0
CC2G_000116	0.617261	0.402256	0.708306	0	0	1.57485	0.982555	1.31566	3.69264	3.68266	3.94561	4.24361	4.20856	4.19402	4.37179	3.86806	4.0115	3.69699	3.54527	3.41062	3.22233	2.08209	1.56071	1.91649	1.27423	1.27265	1.14787
CC2G_000117	0.714357	0.974322	0.841857	0	2.26623	2.1038	0.723026	0.581482	4.58481	5.01836	5.41419	5.50427	5.35037	5.3006	5.60252	4.78101	4.69722	4.38364	4.92946	4.96131	5.06175	3.26966	3.15619	3.10958	2.50116	2.57438	2.50101
CC2G_000118	2.98941	4.44238	4.48501	0	3.48049	3.89271	1.30097	0.412428	6.56332	8.31516	8.17491	8.48402	8.59893	8.64265	8.67944	7.37714	7.51619	7.26608	7.43095	7.25873	7.14579	6.16117	5.88084	5.98607	5.45166	5.36299	5.19236
CC2G_000122	6.88839	7.00566	6.96308	8.44473	8.76203	8.74528	5.45219	5.36483	7.55678	8.28956	9.03132	8.80277	9.15387	8.26253	9.1862	8.29689	8.3373	8.06844	8.81408	8.45924	8.32185	7.20955	7.32487	7.4167	7.54416	7.84736	7.64821
CC2G_000123	3.61036	2.12978	3.18301	8.67441	8.65926	9.30299	0	0.732788	7.13362	6.44537	7.14054	6.86231	7.41464	7.46974	6.23053	4.169	4.60374	4.16379	6.45449	6.44739	7.05451	2.252	1.44392	1.97641	5.02305	4.52034	5.28899
CC2G_000135	0.279274	0	0	0	0	1.21373	0	0	1.28531	1.50765	1.30658	1.35783	1.55466	1.38679	1.56502	2.09677	2.00577	1.94079	1.31182	1.67335	1.48874	1.40409	1.14039	1.12039	1.0096	1.64342	1.21238
CC2G_000129	0.279274	0.567895	0.397192	0	0	0.730907	0	0	0.517227	1.57786	1.36888	1.70076	1.2577	0.807195	1.21728	1.24223	0.780815	1.22409	1.41167	1.17068	1.22667	2.26971	1.74479	2.32263	0.685278	0.772326	0.591308
CC2G_000124	0.279274	0	0	0	1.18283	0	0	0	4.16676	4.23783	4.37549	4.76531	2.58929	2.75867	2.19281	4.23326	4.15409	3.94137	3.76256	3.88391	4.50688	3.47434	3.52301	3.59057	2.76046	2.75816	2.90393
CC2G_000126	0.279274	0.402256	0.397192	0	0	0	0.573356	0.732788	2.72369	5.37699	5.28888	5.3558	3.00989	3.01691	2.82922	3.91584	3.834	3.45482	3.9178	3.9379	3.97663	0.719702	0.755516	1.04776	0.685278	0	0.685209
CC2G_000127	0.890903	1.83697	1.88519	2.11792	0	0	0	0.732788	2.87269	2.95154	3.0267	3.10893	2.50341	2.78306	2.71992	2.00158	2.07297	1.87662	2.22549	2.10956	2.25933	1.04157	1.21358	1.2874	1.49776	1.49602	1.3902
CC2G_000128	0.279274	0	0.397192	2.94136	0	0	0.982555	0.869721	0.897165	2.09137	2.02015	2.00034	2.21004	1.75051	2.11819	1.42942	1.22679	1.50442	2.36489	1.88363	2.27679	2.93448	2.85827	3.04575	1.39032	0.933809	1.3902
CC2G_000130	3.39293	3.0971	3.63342	0	1.5387	2.79434	1.3932	1.10985	4.38096	4.96368	4.86598	4.90432	4.22399	4.60298	4.36374	2.95857	3.44121	3.21642	3.55258	3.60857	3.80681	2.77011	2.96809	3.14483	3.38186	2.47289	2.86433
CC2G_000131	0.890903	0.851145	0.964086	5.89389	7.11044	7.81987	3.31416	3.28828	6.39612	6.71054	6.78049	6.60871	7.19547	7.13701	6.86291	6.96009	6.84472	6.64919	6.47291	6.24332	5.92432	2.59863	2.49712	2.44079	1.64526	1.38865	2.04998
CC2G_000133	1.18999	0	0.841857	5.23831	4.45671	3.89271	3.29037	3.16063	3.15467	5.58522	5.54305	5.4782	5.26534	5.17955	5.29478	4.50027	4.47921	4.45495	5.23452	5.13831	4.73235	1.66709	1.69455	1.67265	3.30998	3.10198	3.24961
CC2G_000134	0	1.0878	1.53688	4.87754	6.40657	6.37157	2.55577	1.99216	5.51416	6.58084	6.49119	6.3744	6.69344	6.61151	6.65182	6.87402	7.07321	6.816	7.40544	7.11248	6.91448	2.37158	2.5686	2.33794	1.69126	2.01235	2.36575
CC2G_000137	3.58491	2.72847	2.67537	5.85279	6.58896	6.21383	6.57259	6.46808	6.34347	6.78756	6.94289	6.98202	7.02982	6.89771	7.05204	5.7369	6.08795	6.27179	6.01812	6.19363	5.92985	7.17121	7.25995	7.34748	6.59788	7.216	6.42302
CC2G_000138	6.35852	5.64963	5.62913	4.70349	5.65931	5.24573	4.79058	4.77999	4.83052	4.77856	4.90329	4.9948	5.13065	5.02456	4.88634	4.96383	4.97487	5.02277	5.43768	5.55975	5.60487	5.24746	5.36473	5.29511	4.62717	4.62458	4.90584
CC2G_000140	2.30781	2.92453	2.63913	0	0	0	0	0	0.655293	1.18666	1.30658	1.00023	0.761768	0.985876	0.602655	0.348376	0	0.354281	0.671762	0.459801	0.432569	0.819218	0.850352	0.931472	0.38295	0	0
CC2G_000139	4.68794	5.48847	5.41542	4.00298	2.87796	3.15643	3.19109	2.76366	4.16676	5.22939	5.07429	5.01167	4.60002	4.67641	4.43464	3.31593	3.46016	3.89353	4.53104	4.4689	4.27469	4.41192	4.53934	4.49569	5.51057	5.09063	5.32591
CC2G_000141	3.98587	4.08047	4.10132	6.01062	6.27077	5.61932	1.97375	1.99216	4.55865	3.83378	3.32266	3.41827	2.75772	2.56134	1.9347	5.21999	3.68623	2.54678	3.18031	2.64499	2.83159	2.55599	2.03459	2.25972	2.98017	1.73394	2.1189
CC2G_000142	5.05533	4.48443	4.45406	7.24156	7.24337	6.56491	2.19488	2.26472	5.51869	4.66218	4.2855	4.69044	3.31368	3.54477	3.21663	5.6454	4.01577	3.05185	4.15718	4.11502	4.3217	3.45899	3.56556	3.60962	3.78327	3.20051	3.295
CC2G_000143	7.60051	7.23392	7.22541	9.50368	9.73263	10.2667	9.76557	9.65784	8.53348	7.78566	7.59408	7.36568	7.81806	7.93002	7.6673	7.26633	7.12855	6.66194	6.83476	6.88551	6.79238	7.39083	7.41004	7.33514	7.30071	7.43925	7.36136
CC2G_000144	2.07168	2.18183	1.82193	2.11792	2.26623	2.79434	0	0	1.84286	1.54318	1.74277	2.06644	0.959017	1.44907	1.32072	3.09395	2.85271	2.38706	0.962607	1.46029	1.68453	1.26981	1.41318	2.03394	2.47511	2.04807	2.44842
CC2G_000145	8.59559	8.54264	8.5397	4.60791	4.82322	5.08679	4.49	4.14663	5.11411	5.87041	5.94053	5.54154	5.2199	5.36864	5.4868	5.09644	4.83184	4.52988	4.8095	4.5825	4.41134	4.27402	4.32902	4.42934	2.84428	2.3918	3.06979
CC2G_000146	5.03198	4.63206	4.24087	2.11792	2.7476	3.89271	3.90581	4.13309	3.20051	2.20665	2.31732	2.72831	2.43878	2.68295	2.45779	4.61083	4.52192	4.62733	2.29687	2.76934	2.54513	3.30442	3.14688	3.11848	1.97773	2.59867	3.85558
CC2G_000147	3.57201	3.87449	4.21648	4.50553	4.68758	4.18203	4.78207	4.84788	4.88767	4.81172	5.15385	4.97199	5.18683	5.03982	5.35492	4.62368	4.75207	5.08088	4.84862	4.62701	4.2171	5.83984	5.90866	5.89585	3.29516	3.4072	2.94247
CC2G_000148	0	0.71646	0	0	0	0	0	0	2.19955	0.437774	1.5411	1.20971	0.581914	0.708806	0.602655	0.285108	0.467788	0	0.724492	0.523974	0.552061	0.497359	0.363748	0.666326	0	0	0.266211
CC2G_000149	1.37955	2.07578	1.18127	6.25106	6.87313	6.70833	4.46896	4.2631	7.04218	9.05794	8.97564	8.77586	8.83917	8.73088	8.97004	8.12236	8.3891	8.80798	8.45386	8.57642	8.31896	4.83688	4.71028	4.70498	3.93435	4.12819	3.87564
CC2G_000150	0	1.29106	0.708306	4.60791	5.35797	5.59983	2.03229	2.16179	5.90523	7.47724	7.17527	6.99551	7.19742	7.23913	7.16523	6.46241	6.66242	7.00482	6.96373	6.9217	6.78858	2.92334	2.86964	2.84608	1.86184	1.49602	1.27412
CC2G_000151	5.93366	7.56806	7.57628	4.60791	5.35797	6.0367	6.00253	6.00836	5.14959	5.84395	5.27471	5.0421	5.36436	5.21582	5.48123	5.16613	5.41609	5.64996	5.81579	5.68257	5.49731	6.09941	6.24062	6.25158	6.9568	7.11646	7.32079
CC2G_000157	7.2439	6.19363	6.47751	6.31299	5.92363	5.91579	5.95035	6.14955	6.30988	6.47097	6.65407	6.47111	6.5901	6.65839	6.4874	6.54406	6.38759	6.24557	6.70054	6.44739	6.57594	6.26521	6.42622	6.49294	7.1054	7.17821	7.20568
CC2G_000158	4.71752	4.70502	4.98838	4.70349	3.70786	3.82717	4.8968	4.88874	4.35079	4.73697	4.72721	4.54733	4.64655	4.47413	4.56325	4.3843	4.29093	4.19043	4.40748	4.53268	4.81233	5.32146	5.44859	5.65736	4.93975	5.20186	4.93958
CC2G_000159	0.890903	0.402256	0.212222	0	0	1.21373	0.573356	0.994777	1.44615	1.09386	1.24147	1.28567	1.19646	1.06755	1.02646	1.92063	1.47057	1.35544	0.500916	0.459801	0.493552	0.234393	0.080457	0.279131	0.266241	0.139006	0.266211
CC2G_000152	6.35288	7.44433	7.43942	6.01062	6.17257	5.74885	8.70138	8.35224	5.351	6.16512	5.94565	5.82541	6.18965	6.27683	6.16022	5.05199	5.31388	5.29034	5.79283	5.51702	5.61862	5.74495	5.84962	5.69797	5.12292	5.18991	5.19236
CC2G_000153	9.45727	8.46665	8.41998	8.56414	8.96818	9.40057	6.25383	6.32951	7.59374	5.86516	5.91988	5.52988	6.07631	6.08913	5.94909	5.39874	5.66914	5.71562	5.81579	5.68958	5.68712	5.30008	5.2411	5.55463	6.75367	6.35252	7.238
CC2G_000155	6.27742	5.06518	5.47831	11.5096	11.7461	11.9873	10.6379	10.7686	11.0973	11.213	11.0973	11.0596	10.431	10.5483	10.6868	10.6496	10.6765	11.0398	9.99105	10.3886	10.5835	7.09941	6.99718	7.1377	8.56598	8.39143	8.40648
CC2G_000156	2.4272	1.19301	1.94579	7.34893	7.18159	7.67837	6.06345	6.24076	6.9001	6.22515	6.24769	6.27774	5.74188	5.91114	5.86031	6.32565	6.33038	6.72934	5.37926	5.50515	5.63563	2.73231	2.5686	2.79153	4.20396	4.05984	4.25061
CC2G_000166	1.18999	1.77053	1.37	0	1.18283	0	0	0.220902	3.17777	2.6755	2.55023	1.97762	1.4272	1.50877	0.898542	1.13865	1.13543	0.738151	1.20454	1.9552	1.57592	1.30457	0.895531	1.25551	3.23432	3.21629	3.46348
CC2G_000168	0.279274	0.402256	0	2.11792	0	0	0.406341	0	4.7247	2.79822	2.45292	2.24829	1.93808	1.53772	1.02646	0.906124	0.933267	0.638488	1.27694	1.35838	0.66241	0.819218	1.10236	0.565884	0.935096	0.490143	0.685209
CC2G_000162	4.05238	4.05279	4.31165	5.23831	5.2417	5.49821	5.26348	4.98233	4.44899	5.25372	4.84422	4.7078	4.87134	5.42977	4.83193	5.06146	5.01387	4.9776	4.84565	4.8468	5.07678	3.71945	3.57253	3.64697	5.61568	5.57375	5.56081
CC2G_000163	3.33304	3.34551	3.25662	2.94136	1.5387	2.9254	2.93905	2.72807	2.6595	2.9647	2.94726	2.71463	2.88931	3.566	3.06598	2.43953	2.5329	2.37162	3.18031	2.93191	2.66927	2.38788	2.30957	2.8026	4.36161	4.48167	4.42406
CC2G_000164	4.8937	6.34398	6.0848	3.46232	3.39597	2.79434	5.18824	5.01223	2.78515	3.6985	3.63301	3.47615	3.72488	3.82277	3.77343	3.02785	3.18438	3.24211	3.85415	3.80861	3.77646	4.57029	4.45885	4.31795	3.74016	3.8329	3.71794
CC2G_000165	1.69717	1.29106	1.07676	0	1.82392	0	0.573356	0.994777	2.10631	2.37386	2.46723	2.62974	2.41209	2.33268	1.97754	2.31836	2.19865	2.20743	3.18031	2.94369	2.92311	3.86628	3.66023	3.68937	6.39395	6.48549	6.35857
CC2G_000160	9.26957	8.82225	8.94467	8.82015	8.69064	8.78466	10.8509	10.8827	7.92936	9.12103	8.75138	8.68936	8.81883	9.06224	8.9091	8.28051	8.60882	8.47192	8.03596	8.06811	8.34427	8.72202	8.5839	8.6774	7.22553	8.14257	7.33081
CC2G_000161	2.48338	3.671	3.83911	4.27603	5.16715	5.2706	3.77479	3.97509	6.35618	6.19475	6.36505	6.3569	5.30757	5.17725	5.29478	6.40405	6.38759	6.4142	5.79591	5.96278	5.82845	4.48193	4.37361	4.56238	4.982	5.04274	4.56658
CC2G_000169	1.04818	1.19301	1.75577	1.41702	2.26623	2.65018	0.406341	0.732788	6.34602	5.17663	4.90855	5.24124	5.09753	5.65784	5.29478	5.08719	5.95621	5.15938	6.15887	6.26695	7.04053	4.68356	4.37759	4.09281	6.16862	6.02068	6.41276
CC2G_000170	1.25598	1.90048	1.45585	0	0	0	1.78237	1.21642	3.39045	3.6906	4.08668	4.08258	3.70853	3.32989	3.74891	2.11508	1.89871	2.18994	2.81737	2.70159	2.79572	2.17895	2.42192	2.01502	2.86449	2.57438	2.92333
CC2G_000171	3.34825	4.73146	4.54501	4.39534	4.41437	4.37785	6.14861	5.81838	4.23442	4.62536	4.27333	4.21475	4.44411	4.73383	4.88634	3.76169	3.79472	3.78119	4.36659	4.36761	4.1429	4.32147	4.3041	4.1152	4.28868	3.78077	4.19583
CC2G_000172	8.67501	10.7693	10.606	9.34968	9.56856	9.60992	9.70612	9.60057	8.15345	8.04427	7.43437	7.45012	7.50145	7.92729	7.46671	7.87325	7.88329	7.66314	7.71492	7.4987	7.93484	5.62115	5.81182	5.579	6.45354	6.58916	6.84152
CC2G_000175	0.513155	0.567895	0	0	1.18283	0	0	0.869721	0.193751	0.191317	0.284874	0.523701	0.261511	0.0808996	0.230002	0.408985	0.933267	0.531427	0.439156	0.322199	0.159041	0.819218	0.939337	0.931472	1.69126	1.64342	1.59763
CC2G_000176	3.87474	3.72462	3.05131	7.76914	7.01449	6.83877	5.56554	5.46009	5.80864	5.17946	5.08825	5.27191	5.4439	5.67586	5.43779	5.22632	5.17358	5.09269	5.25483	5.42549	5.68549	5.62287	5.73622	5.5982	6.39221	6.14342	6.60372
CC2G_000177	1.91709	3.6891	4.34578	4.27603	4.91719	3.95541	4.8889	4.88066	4.90162	5.2564	4.89008	5.07726	4.78818	6.09158	5.37107	5.38183	5.50242	4.93885	6.05847	5.88855	6.51473	4.09199	4.47382	3.59695	7.70834	7.2671	7.74542
CC2G_000173	5.53231	5.16554	5.39926	9.67854	10.0811	10.1882	8.45952	8.44352	8.49894	7.88073	7.89926	7.92823	8.36308	8.3526	8.47342	7.47385	7.21894	6.62009	7.77552	7.96785	7.94375	8.89825	9.1064	8.97873	12.4324	12.2449	12.493
CC2G_000174	5.37785	5.35881	5.17714	5.97275	5.48615	4.87609	7.98648	7.54034	4.79361	4.8897	4.47798	4.57029	4.74071	4.92947	4.98412	3.43001	3.45387	3.6337	4.35827	4.32321	4.09942	4.95373	5.00899	4.93883	4.3687	4.71625	4.55419
CC2G_000179	5.2297	5.73921	5.92466	4.79314	4.49785	5.14174	5.53043	5.54435	4.60199	5.10413	5.17798	5.21233	5.02013	5.16106	5.58184	4.39558	4.48539	4.36427	4.28117	4.4689	4.44647	5.58978	5.572	5.72297	5.73302	5.91824	5.87162
CC2G_000180	5.47804	5.55905	5.30409	5.36065	5.19243	5.31908	6.88604	6.75781	4.90162	5.45835	4.76824	4.83649	5.12244	5.68721	5.22316	5.76616	5.80382	5.75779	5.4178	5.57875	5.84317	5.5667	5.5824	5.61086	4.06238	4.33755	4.13889
CC2G_000186	1.25598	1.0878	3.02347	5.6276	4.02171	2.79434	2.70718	1.40851	10.3204	5.93537	6.21944	7.02974	7.35852	7.15347	6.99779	9.79885	9.20325	9.31685	10.5241	10.8507	10.8603	4.1882	4.05809	4.13724	4.97737	4.35904	4.39656
CC2G_000182	8.17874	7.68201	7.86714	8.29165	8.05441	8.49132	9.00525	9.17855	7.32165	7.09943	7.12821	6.88615	7.28689	7.20796	7.26695	7.17657	7.07269	7.21942	6.61235	6.6461	6.44021	7.51568	7.45081	7.43016	7.10327	7.37037	6.98112
CC2G_000183	5.71646	4.68712	4.6849	5.30077	5.28934	5.53972	5.70703	5.75791	4.75573	3.63405	3.95072	3.76861	4.19688	4.10495	3.87889	4.07861	3.9636	4.10433	3.39884	3.23962	3.19505	4.02583	4.03808	4.03293	4.06238	4.20141	3.94371
CC2G_000184	4.34549	4.3083	4.53518	4.50553	5.67733	4.93949	5.72932	5.97838	5.29928	4.97348	4.98264	4.73853	5.07219	5.0499	5.18254	5.37805	5.49784	5.47683	4.94898	4.79572	5.06928	4.80992	4.77819	4.98575	4.12237	4.03335	3.60235
CC2G_000187	8.43348	8.59096	8.56346	7.33407	7.36508	7.51106	9.06475	8.87779	6.89314	6.59889	6.62724	6.44339	6.78663	6.52199	6.83333	6.68093	6.67869	6.6871	6.3876	6.4234	6.28175	6.89148	6.94239	6.73043	6.67143	6.46416	6.83128
CC2G_000188	2.30781	2.86209	2.67537	0	1.18283	2.9254	2.34099	2.26472	2.40926	1.8853	2.28537	2.08781	2.60115	2.28226	2.48774	1.76702	1.91711	1.53245	2.41387	2.30486	2.45601	2.4971	2.54044	2.49642	1.21248	1.54684	1.90138
CC2G_000189	8.88804	8.99631	9.07798	4.50553	4.02171	3.68642	4.04025	3.76289	4.29905	4.54876	4.64463	4.61515	4.70543	4.78603	4.93877	5.07789	5.32598	5.61925	5.38951	5.30282	4.96817	6.263	6.06637	6.39388	9.15379	8.94181	9.33701
CC2G_000190	5.34411	5.54422	5.39926	3.46232	4.53784	4.46662	5.04632	4.83956	3.37054	3.4309	3.3918	3.70086	3.84447	3.76274	3.47764	4.5848	4.47611	4.02761	4.03203	4.4689	4.23059	4.2021	4.29991	4.04231	3.54104	3.27777	3.3817
CC2G_000191	4.3829	4.09412	4.28844	5.03282	6.09427	5.51911	1.30097	1.21642	7.13362	7.59831	7.42935	7.41514	6.8047	7.22419	6.92784	7.8261	7.71534	7.6111	7.15175	7.22112	7.42456	3.61945	3.60009	3.63463	3.18695	2.94029	3.28002
CC2G_000192	2.66439	2.37308	1.61359	5.36065	5.69512	4.55023	6.44103	6.30557	4.43947	4.89315	4.72424	4.83964	4.80109	4.96453	5.2518	4.20363	4.35983	4.15028	4.08844	4.26338	4.01873	4.09696	4.16804	3.98024	2.50116	3.3511	2.7603
CC2G_000193	0	0	0	5.23831	5.28934	5.58007	3.11187	2.57625	4.67686	5.72522	5.64884	6.60501	5.84649	5.88462	5.59737	5.26782	5.15431	5.51772	4.1997	4.40643	5.15436	5.88073	5.9169	5.70094	8.86333	8.33832	8.27534
CC2G_000194	4.32258	2.98437	2.31086	7.34893	5.93864	6.57493	3.11187	3.7452	4.54094	5.04958	5.05073	5.45577	5.50042	5.63291	5.76723	3.92624	3.84365	4.32874	2.74265	3.09923	3.16725	3.46669	3.58638	3.60962	5.09752	5.01593	5.39006
CC2G_000195	1.91709	2.61945	2.84406	0	1.5387	0	1.30097	1.65581	0.364536	1.23091	0.678375	0.807551	0.803435	0.807195	0.708172	0.285108	0.364282	0.354281	0.671762	0.39264	0.493552	1.04157	0.426659	1.01003	0.38295	0.265787	0.773369
CC2G_000196	3.93641	3.29913	3.41505	2.11792	2.60428	1.86343	1.09668	1.49574	2.6263	2.7685	2.86319	2.95459	2.94622	2.80703	3.18956	3.14829	3.0902	3.44748	1.92112	2.44405	2.88947	4.34253	4.47382	4.41136	3.59043	3.23191	4.0446
CC2G_000197	0	0	0	0	0	0	0	0	3.1312	0.712044	1.17329	0.644021	1.13251	1.3217	0.942453	0.863446	1.07114	1.61343	2.131	1.97829	1.92489	2.54149	2.2758	2.66371	2.82377	2.75816	2.2476
CC2G_000198	4.07998	4.24854	4.03313	6.73106	7.21898	6.82204	4.68506	4.60467	6.70521	7.03849	6.92097	6.96045	6.21496	6.60554	6.27414	6.68935	6.61176	6.30671	6.66978	6.69657	7.12426	4.9205	4.71973	4.89292	4.34731	4.38721	4.23517
CC2G_000199	4.42654	4.08047	4.16643	5.76688	5.73006	6.07955	5.40312	5.13958	7.32036	6.88943	7.18883	7.45063	7.00994	7.4341	7.06265	7.43885	7.26053	7.21942	7.49685	7.59427	7.85938	7.61553	7.94225	7.84879	9.46392	9.25099	9.58935
CC2G_000200	4.25156	4.39905	4.16643	2.11792	2.06196	2.9254	2.59514	2.79839	3.99533	4.11923	3.56145	3.69391	3.88869	4.14783	4.05922	3.77902	3.68086	3.74571	3.98417	3.95546	4.1851	3.69345	3.18377	3.67135	4.21187	4.23279	3.69555
CC2G_000201	4.02425	3.04184	3.30369	0	2.7476	3.15643	2.67079	2.57625	7.23759	7.54727	7.60058	7.53913	6.79247	7.02072	6.71331	7.47074	7.59654	7.60945	7.21991	7.2605	7.4565	6.18702	5.8177	6.17586	5.17241	5.53964	5.43805
CC2G_000202	1.25598	1.46918	0.561119	0	1.18283	0	0.723026	1.10985	1.72235	1.50765	1.83393	2.30414	2.08046	1.84618	1.44804	1.64634	1.76285	1.61343	2.16954	1.97829	2.09195	3.31298	3.07996	3.42841	2.33726	2.71436	2.82362
CC2G_000203	6.51496	5.23493	5.37191	6.96122	7.28509	7.21693	8.13411	8.10505	7.01037	7.47896	7.27676	7.14192	7.26376	7.4688	7.30844	6.919	7.17613	7.2086	6.85338	6.81673	6.79465	7.27235	7.31555	7.47196	5.88176	6.04961	5.85909
CC2G_000204	5.75691	6.56097	6.51799	6.99939	6.51073	6.0367	6.62346	6.60435	6.17863	6.41213	6.47092	6.70695	6.42724	6.36124	6.52669	5.92115	5.9484	5.85674	6.81133	7.12934	6.98387	7.37762	7.39684	7.4221	8.22071	7.92206	8.02843
CC2G_000205	2.68849	4.33153	4.19167	3.84426	3.70786	3.2594	2.38658	2.89782	4.52301	4.56614	4.51977	4.57029	3.82942	3.52322	3.55747	3.47323	3.89562	3.95697	3.83629	4.16115	4.46942	3.44348	3.32256	3.35506	2.42154	2.04807	2.01424
CC2G_000206	8.21963	8.0845	8.13696	5.57802	6.15981	5.86771	7.38717	7.44355	6.03423	5.96023	6.08672	5.98059	6.40118	6.1595	6.37172	6.56918	6.55633	6.62661	6.18498	5.97575	5.75096	6.16945	6.21746	6.18224	6.36409	6.60423	6.60071
CC2G_000207	5.60692	5.32449	5.29247	6.21907	6.91928	6.87975	6.40271	6.43811	6.03106	5.68998	5.80346	5.77194	5.502	5.41814	5.44544	6.83728	6.69077	6.78211	5.4158	5.84368	5.76957	7.8764	8.05481	7.96489	7.56516	8.17019	7.66847
CC2G_000208	0.971684	1.38287	0.708306	0	1.82392	1.86343	2.24525	1.86687	2.19955	2.13859	2.03943	2.06644	2.0287	2.15725	1.89055	1.79	1.89871	2.3243	1.75363	1.75584	2.16875	8.4628	8.53499	8.62902	9.18476	9.13509	9.58555
CC2G_000209	5.55215	3.53753	3.43632	7.07282	6.96401	6.88781	8.0779	8.30321	7.21404	7.27942	7.32076	7.18347	7.21007	7.38765	7.38453	7.00619	7.21476	7.40998	6.96441	6.81352	6.84598	7.45991	7.4456	7.56353	5.94482	6.45919	6.11249
CC2G_000211	4.72919	5.80707	5.6152	3.84426	2.26623	2.79434	2.24525	2.40654	2.19955	0	0.818903	0.858186	1.4272	1.10671	1.02646	1.24223	1.13543	1.32371	1.96561	1.55548	2.03155	1.64013	1.6425	1.6966	3.97211	3.55108	4.05343
CC2G_000210	2.07168	4.42088	4.08794	0	2.26623	2.30978	3.47053	3.83157	2.52186	1.64482	1.71905	1.93107	2.4779	2.64354	2.58791	1.79	2.05646	1.8322	2.89993	2.64499	2.62906	4.37151	4.2044	4.29852	4.76259	4.64222	4.70752
CC2G_000212	1.12082	0.402256	1.53688	1.41702	1.82392	2.65018	0.723026	0.994777	5.56323	2.6594	3.0928	4.08258	3.50891	3.39462	3.2779	4.72251	4.59233	4.59114	4.28117	4.1911	4.43486	2.6536	2.66308	3.06428	2.21663	2.01235	2.27806
CC2G_000213	6.30497	6.94859	6.97039	6.98043	7.15612	7.01098	6.44642	6.44635	6.33579	6.71347	6.49119	6.39169	6.77686	6.74239	6.59363	7.29772	7.30051	7.00356	6.85412	6.98932	7.09873	6.20208	6.29538	6.22918	7.13066	7.03868	7.10203
CC2G_000214	3.04647	3.25122	3.39345	2.58761	2.06196	1.86343	3.95203	4.06341	1.10425	1.54318	1.36888	1.3926	1.90018	1.75051	1.62013	2.55131	2.65854	2.3243	1.82781	1.46029	1.48874	1.46682	1.47402	1.46523	1.54862	1.27265	1.27412
CC2G_000215	9.0286	9.31567	9.42288	8.39548	8.35231	8.24381	10.6498	10.644	6.77882	7.38049	7.02378	6.92749	7.43715	7.7531	7.23531	7.22373	7.42509	7.11495	6.85189	6.85465	6.85036	6.66109	6.59834	6.75985	4.85641	4.72731	5.59145
CC2G_000216	5.46065	5.66343	5.58694	3.46232	1.82392	2.1038	2.87652	2.65416	5.98923	4.90685	4.91899	4.65507	5.29485	4.98307	5.30323	4.84821	4.42879	4.71251	5.24809	5.50912	5.5699	4.80081	4.88566	4.93883	6.41466	6.47404	6.66694
CC2G_000217	7.93361	8.60771	8.59514	5.76688	5.52646	5.73104	3.38326	3.70915	5.27806	4.36241	4.34869	5.07726	4.67769	5.09442	4.86368	7.0556	6.64043	6.4142	5.93386	6.38612	6.48782	5.02059	5.04953	4.96618	4.43779	4.75459	4.95851
CC2G_000258	0.890903	0.851145	0.841857	0	1.82392	0	2.29391	2.10743	2.8441	4.61287	4.57366	4.4225	2.88931	3.04742	3.34487	2.15101	2.25761	2.58743	3.19907	3.34107	3.35971	8.61877	8.56501	8.69664	6.28942	6.91958	6.18259
CC2G_000256	2.66439	3.12395	3.28035	3.84426	4.57676	3.95541	3.93679	4.37086	5.21246	7.46571	7.43801	7.37821	6.32634	5.97471	6.51493	4.43254	4.37987	4.19482	5.657	5.46689	5.55209	4.23851	4.11172	4.28278	4.7354	4.65964	4.63877
CC2G_000257	5.84263	5.43586	5.07232	6.31299	7.04256	6.83877	6.48623	6.60925	8.17155	10.0539	10.2672	10.3548	8.8247	8.80438	9.23998	7.09129	7.19133	6.98973	8.41629	8.28212	8.73168	7.0284	7.21332	7.19189	8.20988	8.31514	8.17623
CC2G_000259	1.69717	1.96131	2.26403	0	0	0	0.723026	0.581482	0.655293	1.09386	1.02641	0.755073	0.803435	0.708806	0.656378	1.33886	1.07114	1.07956	0.775363	1.00068	0.493552	2.10199	1.95146	1.6966	1.94012	1.64342	1.59763
CC2G_000260	4.58899	4.1734	4.44359	5.85279	5.81389	5.96233	5.10204	4.88066	4.96274	4.03438	4.02997	3.69391	4.31322	4.29497	4.11785	4.28673	4.25159	4.19482	3.68486	3.99562	4.1189	5.10436	4.96198	5.35089	3.86581	4.26351	3.86564
CC2G_000261	6.34152	7.30459	7.41149	6.04752	5.54621	5.00023	8.38145	8.25635	5.86666	6.61672	6.52664	6.39813	6.54168	6.50651	6.60989	5.79908	6.49257	6.31782	5.72004	5.38718	5.67071	6.33097	6.42814	6.52004	4.41055	4.56418	4.41723
CC2G_000262	6.44418	5.16554	5.33274	6.75357	7.06326	7.74199	8.3523	8.36894	6.8271	7.02127	7.04181	6.69742	6.852	6.72125	7.05204	6.12234	6.0331	6.24663	5.63995	5.55975	5.2235	6.6819	6.85217	6.82037	7.66794	7.77325	7.65983
CC2G_000263	2.73552	2.86209	2.74523	4.00298	4.07705	3.53043	5.96545	5.54945	3.26664	4.30146	4.04912	3.70086	3.9549	4.44768	3.76734	3.4803	3.73891	2.97221	4.45116	4.08342	4.20803	3.97817	3.60009	3.78183	3.36777	3.61202	3.54088
CC2G_000264	3.49211	3.17621	3.28035	5.76688	5.16715	5.81796	4.90465	5.04151	4.11983	3.25991	3.25828	2.88304	2.56527	2.57537	2.90884	2.04042	1.91711	2.18994	2.31418	1.88363	2.11154	2.38788	2.71441	2.49642	4.49726	4.15301	4.56658
CC2G_000266	2.53746	1.46918	1.18127	0	2.44513	2.65018	2.08855	2.05095	3.28803	2.6594	2.79676	2.74186	2.62459	2.88795	2.53152	2.9484	3.03228	3.1181	3.25391	3.29584	3.47003	3.06186	2.93601	2.87785	3.32464	3.11887	3.2649
CC2G_000267	8.9797	10.6152	10.4616	8.48564	8.25968	8.14976	9.77818	9.71292	7.15996	8.14492	7.73009	7.8365	7.35152	7.49809	7.22089	7.02809	7.3975	7.09158	7.22792	7.07749	7.2876	6.30008	6.12919	6.1833	5.88671	6.35609	5.93273
CC2G_000268	7.04476	6.72345	6.71801	6.18635	5.83009	6.02213	6.94817	6.86409	5.48204	4.70595	4.90855	4.96911	4.81389	5.10655	5.0904	6.35772	6.06749	5.9916	5.27485	5.36107	5.45577	4.98888	4.89125	5.08435	3.24977	3.37942	3.23416
CC2G_000269	0.617261	1.0878	1.82193	2.58761	2.44513	2.65018	3.74008	3.51401	3.69264	2.73816	3.00725	3.02277	2.77876	3.05745	1.89055	3.27581	2.93629	2.94118	3.25391	3.36754	3.28405	0.819218	1.10236	0.71404	0.49092	0.382322	0.773369
CC2G_000270	5.96853	5.86791	5.91711	4.60791	5.28934	5.29505	8.3673	8.30018	4.59342	5.24296	5.16487	4.48425	5.33979	5.26642	5.39695	4.138	4.44791	4.25915	4.96002	4.64154	4.48452	5.15762	5.05202	4.99302	3.82513	3.47438	3.47667
CC2G_000271	1.25598	1.38287	1.94579	0	0	1.21373	0.723026	0.412428	0.517227	1.09386	0.576459	0.459556	0.376402	0.603213	0.3652	0	0.309604	0.222816	0.439156	0	0.493552	0.612809	0.803713	0.400752	1.39032	0.590463	0.490867
CC2G_000275	3.62293	2.07578	2.48431	4.70349	4.32576	4.7042	6.32581	6.29649	3.69264	5.59583	5.6457	5.50029	5.74322	5.61774	5.8034	3.45178	3.63156	3.2336	5.23679	5.15106	5.30869	5.95782	5.35869	5.72297	5.18853	4.98401	5.43129
CC2G_000277	5.77952	3.6153	3.5961	5.89389	4.13034	3.61053	7.58591	7.69002	6.32289	6.32039	6.66962	6.71126	6.74113	6.67803	7.11874	6.0752	6.19741	6.62336	6.11757	6.09012	5.95038	7.6421	7.54198	7.68673	4.93975	5.86665	4.9632
CC2G_000278	9.06473	8.77802	8.85173	6.28236	6.94925	6.95071	4.3816	4.71785	5.16701	2.70717	2.4814	2.6586	2.60115	2.87667	2.93081	3.7264	4.03275	4.37593	2.86512	2.35864	2.69546	2.55599	2.25861	2.08927	7.62341	7.33194	7.8288
CC2G_000279	3.79928	4.74882	5.09257	2.58761	2.87796	3.44562	4.81579	4.50306	4.08359	3.89006	4.05387	3.93116	4.24682	4.15719	4.25911	3.30002	3.56892	3.68456	3.83629	3.53262	3.44709	4.46282	4.45131	4.52608	1.97773	2.59867	2.21649
CC2G_000280	5.24196	4.99417	4.80426	6.63735	7.73986	7.12446	8.07529	8.1427	7.52335	5.65387	6.06336	5.96335	7.25158	7.46457	7.08853	7.72133	7.60862	7.7504	9.08281	9.1287	8.81131	6.68437	6.6724	6.7326	7.14931	7.47332	7.28749
CC2G_000282	3.63538	4.23628	4.10132	4.87754	5.06137	5.16845	5.10886	5.09836	5.07157	5.1907	4.99996	5.29277	5.2352	5.32156	5.1618	4.87263	4.84392	5.14584	5.38337	5.20344	5.06175	5.98754	5.97462	5.82835	6.47507	6.4034	6.37979
CC2G_000283	5.36295	4.41001	4.86828	5.23831	6.35153	7.09692	5.22007	5.10531	6.0717	5.93704	6.26417	6.10767	6.44215	5.79004	6.15323	6.0373	5.75093	5.62902	6.55527	6.48817	6.08279	5.90783	5.88365	5.79268	6.71104	6.44083	7.1706
CC2G_000284	3.84288	2.86209	2.67537	3.84426	3.30619	4.07317	4.51074	4.48185	3.22289	3.12571	3.30683	3.10893	2.89895	3.41816	3.50718	3.50133	3.65915	3.9203	4.04245	4.07274	3.85989	3.51201	3.42626	3.76494	1.86184	2.88209	2.99842
CC2G_000285	2.58958	1.62771	2.21563	2.94136	2.26623	2.49	3.29037	3.16063	2.59232	3.54045	3.50015	3.60033	3.31368	3.18187	3.47016	2.7865	3.0902	3.09008	3.02081	3.18111	3.24911	4.13125	5.05452	4.53607	2.94263	4.64805	2.55176
CC2G_000286	8.21445	10.0652	9.95615	6.4294	6.12084	6.42792	2.29391	2.21418	4.52301	4.15412	3.8451	3.79484	3.55233	4.24757	3.75508	6.80311	6.53787	6.4076	5.50516	5.44841	4.44647	1.12173	1.0633	1.3186	2.15231	2.3918	2.42139
CC2G_000287	7.20057	9.12569	9.1602	5.17301	5.48615	5.14174	2.87652	2.61573	4.04643	5.43962	4.68192	4.22925	4.66645	5.38666	4.78144	5.91071	6.04884	5.57107	6.14564	5.85776	5.68058	1.43579	1.6425	1.62353	1.44504	1.27265	2.62467
CC2G_000288	0.714357	1.0878	1.45585	0	0.709386	0	0.21743	0.412428	0.897165	2.60999	2.81925	2.17028	2.70373	2.13847	2.48774	1.20852	1.36727	1.22409	1.94354	1.75584	2.31107	2.32154	2.13219	2.67581	1.97773	1.73394	2.62467
CC2G_000289	0.617261	0.567895	0.561119	0	0	0	0.573356	0	0.655293	1.04512	0.94695	0.954417	0.995425	0.708806	1.14395	0.523062	0.654876	0.354281	0.724492	0.755439	0.813558	0.956697	0.850352	1.12039	0.856533	0.684258	0.773369
CC2G_000291	0.400949	1.62771	1.27872	0	0	0	0	0	0.364536	0.191317	0.218754	0	0.0699543	0	0	0.149585	0	0.0781586	0	0	0.159041	0.435973	0.156663	0.0750068	0.38295	0.490143	0.266211
CC2G_000290	7.80103	8.00366	8.02292	8.03107	8.30963	8.53815	5.75126	5.93222	8.0633	8.00658	8.36935	8.20869	8.29487	8.09157	8.56207	7.63991	7.88563	8.11756	8.86009	8.6156	8.57957	7.59329	7.82709	7.90512	10.187	10.0568	10.2326
CC2G_000292	6.8068	6.37226	6.44639	5.10462	4.68758	4.18203	5.54558	5.58966	5.21804	4.73697	5.03401	5.27889	5.09544	5.16802	4.90032	6.49336	6.04361	5.84561	5.37308	5.68257	5.59098	5.20669	5.324	5.37149	3.84562	4.34475	4.1717
CC2G_000293	5.72231	5.84792	5.79889	6.68497	6.49049	6.48216	6.11175	6.26889	6.33322	6.38178	6.37836	6.10111	6.07525	6.19628	5.91643	6.25724	6.05923	6.15267	5.81731	5.82629	5.90059	5.90924	5.95474	6.03032	6.47507	5.98427	6.6452
CC2G_000294	5.77671	5.60267	5.49868	3.84426	3.96417	3.61053	0.982555	1.21642	4.04643	3.302	3.52772	3.24834	3.49627	3.19101	3.00516	4.43254	4.17336	4.3167	3.86005	3.48505	3.32657	3.1695	3.07996	3.11848	3.85575	3.32221	3.73999
CC2G_000296	5.25413	7.69214	7.61061	5.6276	5.52646	5.71301	7.2083	7.22642	5.77496	6.47442	5.82306	6.11419	6.3564	6.87023	6.29122	6.91051	6.94117	6.45231	6.70547	6.29596	6.27743	5.17416	4.98567	5.00025	3.64987	3.65899	4.28101
CC2G_000297	0.805329	1.46918	1.53688	0	2.60428	1.86343	0.982555	1.86687	3.15467	3.72968	3.7252	3.39273	3.69198	3.55896	3.43217	3.50828	3.47886	3.57426	3.98957	4.06736	4.03421	1.99964	1.6425	2.14255	1.21248	1.00824	1.3902
CC2G_000298	2.53746	1.70089	0.841857	5.97275	4.88654	4.7042	5.04632	5.02694	7.04218	7.17287	7.26452	7.19644	6.10887	6.06572	6.28057	6.01676	6.15345	6.56263	5.84288	5.93207	5.75563	4.90642	5.00126	5.07981	4.34011	4.28612	4.14716
CC2G_000305	7.35253	6.87343	6.98671	7.52933	7.58622	7.52663	5.95035	5.84355	7.2499	6.37194	6.955	6.92304	6.84329	6.83203	6.94143	7.20409	6.99577	6.85953	6.80063	6.97073	6.96381	7.11663	7.3331	7.25776	10.0579	9.94716	10.2229
CC2G_000299	6.03112	5.92248	6.02286	6.18635	5.69512	6.07955	6.78964	6.76222	6.23753	6.48016	6.58604	6.53767	6.49794	6.44576	6.68935	6.30087	6.4639	6.501	6.44274	6.36766	6.28715	6.55682	6.58633	6.60158	6.38348	6.23151	6.37451
CC2G_000300	7.82025	7.76219	7.9219	6.5881	6.73373	6.53443	6.93289	6.93409	6.85245	6.624	6.90857	6.81903	6.79569	6.73694	6.92647	7.60431	7.56114	7.50279	6.79525	6.9519	6.83277	6.66527	6.84643	6.78381	5.55789	6.28488	6.08906
CC2G_000301	2.66439	3.22665	3.32666	4.79314	4.9472	4.84331	5.69349	5.3935	5.10811	5.52651	5.37108	5.34474	5.44061	5.39854	5.66446	4.39558	4.38318	4.55742	4.99799	4.8468	4.76982	5.63316	5.71117	5.74754	4.7354	5.24482	4.61511
CC2G_000302	9.27107	8.9954	9.07882	9.13073	8.87757	9.12864	11.9338	11.8979	8.11208	8.87615	8.67272	8.67906	8.85643	8.89334	8.88117	8.4846	8.71651	8.54405	8.30112	8.25874	8.3068	8.72182	8.78092	8.71398	7.07319	7.67385	6.66982
CC2G_000303	8.73265	8.82225	8.74227	9.00973	8.5486	8.79112	11.4584	11.3676	7.7191	8.32604	8.07188	8.03663	8.3849	8.37408	8.28802	7.90385	8.1219	7.82596	7.61808	7.56072	7.57234	7.80156	7.83581	7.79052	6.57352	6.81201	6.46665
CC2G_000304	8.31027	8.45347	8.46208	6.04752	7.11044	6.70833	3.49154	3.28828	6.89314	7.23122	7.20119	7.06923	7.20716	7.25175	7.45254	7.13456	7.11416	6.89168	6.558	6.97001	7.0418	7.5286	7.71065	7.56921	9.59503	9.34194	9.57256
CC2G_000309	3.2545	2.72847	2.35621	3.22523	2.44513	2.65018	4.88096	5.19276	5.17851	5.08014	4.96257	5.08525	5.49725	5.38068	5.4301	5.13732	4.99017	5.10675	6.2893	6.39366	6.47465	4.76382	4.77215	4.79093	4.41741	4.71625	4.37559
CC2G_000306	7.5773	6.26475	6.34879	7.78014	8.26267	8.22803	7.2536	7.29642	7.96962	7.53132	7.83001	7.88157	7.6523	7.68963	7.76453	7.98913	8.00309	7.93106	7.54849	7.65374	7.78814	7.5003	7.66409	7.53392	7.05021	6.9494	6.93049
CC2G_000307	3.71965	3.49701	3.51842	4.79314	4.68758	4.50903	3.63066	3.26364	4.21222	3.91061	4.0203	4.07189	3.86429	3.98921	3.61287	4.5716	4.473	4.56423	4.12322	4.15102	4.17583	3.8546	3.87847	4.03763	4.85641	4.84875	4.81009
CC2G_000308	5.16676	5.96394	5.80708	5.47342	5.7127	5.93147	7.1132	6.94962	5.4774	5.97005	5.88299	5.92674	6.07419	6.03939	6.23716	4.68929	4.82455	4.77837	5.07869	4.86549	4.60342	5.86916	5.94134	5.78572	7.7991	7.49936	7.81068
CC2G_000310	3.34825	4.23628	4.19167	4.87754	4.02171	3.35552	2.77732	2.57625	3.1312	3.84806	3.63301	3.95462	3.76234	4.09525	3.53613	4.93321	4.473	4.42536	4.53474	5.05388	5.30869	3.54872	3.38726	3.64697	2.30803	2.57438	2.55176
CC2G_000311	5.28607	5.27742	5.1452	4.50553	4.68758	4.77543	4.08242	4.07761	4.92228	4.81898	5.07896	5.03662	5.24469	5.18413	5.0658	5.34547	5.01814	5.1728	5.66039	5.59938	5.60659	4.92609	5.15779	5.13343	5.16019	5.00233	5.1641
CC2G_000312	4.70576	4.80798	4.41172	4.27603	3.21045	3.68642	3.84179	3.91306	4.59342	4.24324	4.26926	4.2719	4.87379	4.48903	4.31446	4.77238	4.52192	4.70637	4.6753	4.49315	4.56841	4.35087	4.33723	4.37472	4.58515	4.58256	4.5417
CC2G_000314	0.805329	1.29106	0	2.11792	3.21045	1.21373	2.77732	2.53565	2.6263	2.81285	2.8953	2.82057	2.63616	2.95387	2.7937	1.83487	2.19865	2.06115	2.41387	2.10956	2.65599	1.79484	1.31683	1.74334	2.24775	1.54684	2.2476
CC2G_000316	2.36874	1.46918	0.964086	5.23831	6.67217	6.59476	1.71248	1.65581	5.919	6.6188	6.59013	6.73262	5.87119	6.12891	6.09605	6.20692	6.44975	6.63633	6.97397	7.21566	7.0895	2.21594	2.16945	2.39761	1.27423	1.27265	0.935008
CC2G_000317	2.36874	0.974322	0.397192	3.22523	3.1079	2.49	5.87638	5.52892	2.69196	2.57608	2.62871	3.34914	2.94622	2.31607	2.3478	2.86432	2.91813	2.20743	3.47005	3.60116	3.44709	6.82794	6.84499	6.91209	4.57292	5.26773	4.44434
CC2G_000322	5.08741	5.76929	5.81116	2.58761	3.21045	2.49	3.02805	3.18708	3.08307	3.16045	2.45292	2.68689	2.97385	3.04742	2.62879	5.72503	5.65413	5.63388	4.46672	4.55204	4.2616	3.41194	3.41079	3.68339	1.14797	1.89954	0.490867
CC2G_000323	2.90964	3.25122	3.34927	2.58761	1.82392	3.2594	2.19488	2.16179	2.36968	1.79975	1.62007	1.67274	1.47954	1.62124	1.9128	3.15715	3.30109	3.19026	3.73069	3.73596	3.44709	2.28719	2.01425	2.78036	1.33344	2.08293	1.49764
CC2G_000318	8.73229	8.61837	8.72292	6.11861	6.38481	6.83877	5.87238	5.98594	6.00223	5.49963	5.68449	5.51022	5.77236	5.64792	5.61952	6.29787	6.02039	6.03512	5.61747	5.75955	5.64069	6.50732	6.69174	6.68551	6.41123	6.42903	6.69119
CC2G_000319	1.74391	2.23207	2.84406	0	0	0	0.982555	0.869721	0	0.712044	0.218754	0.459556	0.482815	0	0.602655	1.13865	0.610329	1.00148	0.500916	0.322199	0.860616	0.91231	0.755516	0.71404	1.69126	1.00824	1.27412
CC2G_000320	0.971684	1.46918	1.37	0	1.18283	0	0.406341	1.10985	4.42988	1.85734	1.5679	1.93107	2.13043	1.25354	1.59284	4.20363	3.834	3.95697	2.02987	2.28648	2.68242	1.37167	1.6425	1.78862	1.39032	1.33181	1.3902
CC2G_000341	0.400949	0	0.397192	3.46232	3.90423	2.30978	0	0	2.69196	1.61173	1.13794	1.04463	1.62607	1.21821	0.708172	1.17401	1.70046	1.91972	1.62085	1.52445	1.60385	1.74509	2.07442	1.76616	1.73583	2.62257	2.33711
CC2G_000324	2.51067	3.17621	2.74523	3.66589	3.90423	4.55023	3.16516	3.44992	5.06539	6.92185	6.3641	6.37114	4.82405	5.41033	4.75398	6.40777	6.72904	6.63794	8.19477	7.89161	7.4098	5.92189	5.68085	5.98849	4.87646	4.9932	4.81529
CC2G_000325	5.66273	5.85595	5.79478	4.79314	5.67733	4.90814	3.95203	3.89712	4.33031	2.73816	2.61592	3.86461	3.16977	4.04572	3.18042	5.35127	5.3617	4.90708	4.18567	4.35443	4.53978	3.84282	3.67973	3.505	4.63307	4.43521	4.48408
CC2G_000326	3.54587	3.12395	2.77893	0	0	2.30978	0	0	1.84286	1.04512	0.86286	1.24819	0.803435	1.18199	1.44804	3.05655	3.29406	2.72741	2.26162	2.67357	3.2042	1.37167	1.47402	1.78862	2.01438	2.44637	2.67131
CC2G_000327	5.81826	7.33076	7.17725	5.41814	5.89312	5.80099	5.11564	4.83956	5.59361	5.70966	5.76198	5.72155	5.68311	5.62281	5.93421	5.97351	6.06749	6.08448	5.98878	6.23496	6.17991	6.86407	6.82177	6.71439	9.2067	9.12598	9.18232
CC2G_000328	4.09808	4.09412	4.0191	4.60791	4.13034	4.01549	4.41498	4.4925	5.69315	5.31924	5.36918	5.46601	5.48769	5.39261	5.58357	5.56445	5.53853	5.79009	5.72813	5.95262	5.80759	5.11664	5.00899	5.12021	4.78397	4.96077	4.84611
CC2G_000329	2.86804	4.18619	4.3681	4.95727	4.45671	4.90814	2.34099	2.31356	6.36124	7.72361	7.2798	7.382	6.83452	7.19892	7.14011	6.61733	6.75868	6.73388	7.13663	7.22956	7.23276	5.6819	5.50434	5.49613	5.12292	4.87386	5.31493
CC2G_000330	8.98731	9.13108	9.20195	8.48564	8.06129	8.30828	11.1877	11.116	7.21264	8.23323	8.00572	7.97092	8.22592	8.17398	8.2533	7.36524	7.54902	7.18396	7.63238	7.62294	7.56968	7.76537	7.66694	7.62994	5.8941	6.36497	5.54524
CC2G_000331	7.90689	9.11694	9.16299	0	1.82392	2.1038	2.93905	2.3608	2.00663	2.11517	2.31732	2.37541	2.91804	2.77092	2.33137	4.51413	4.39308	4.4141	2.96711	3.01241	2.66927	2.26971	2.07442	1.83251	2.52676	2.33509	2.73856
CC2G_000332	8.87596	10.333	10.3785	4.00298	2.44513	3.44562	0.858618	1.21642	3.20051	4.40165	4.4602	4.6764	4.07033	4.10011	4.10341	6.88006	6.63974	6.27801	5.37721	5.65058	5.36076	0.435973	0.895531	0.848389	1.21248	0.933809	1.49764
CC2G_000333	8.2103	8.06298	8.23507	7.82334	7.45137	7.45792	9.31663	9.40388	6.9122	8.17779	7.7133	7.67111	7.52772	8.19741	8.08597	7.07209	7.46238	7.30469	7.12135	7.07281	7.46175	8.09631	8.23423	8.20949	8.58742	9.04431	8.78312
CC2G_000334	4.63931	4.55521	4.74582	5.23831	5.42348	6.1616	3.11187	3.07823	5.37618	4.10741	4.2024	4.35799	4.49586	4.65345	4.57027	5.80332	5.74451	5.61925	5.49381	5.6105	5.66244	4.79165	4.69758	4.67214	6.55343	6.57392	6.93408
CC2G_000335	4.39026	4.16048	4.57409	5.85279	5.56568	6.09355	7.56747	7.68191	6.14971	6.42051	6.69188	6.76449	6.39012	6.60383	6.96224	5.29216	5.16205	5.7018	5.42777	5.57308	5.27217	5.28057	5.50616	5.36029	3.75106	3.96958	4.16357
CC2G_000337	7.16773	6.29164	6.33752	7.68966	8.30674	7.91363	6.64002	6.78837	8.0096	6.64152	7.18667	7.63617	7.07571	7.13287	7.22312	8.30314	8.23694	8.07947	7.53518	7.99747	8.03343	7.031	7.18857	7.13222	10.0333	10.0619	10.3162
CC2G_000338	7.28598	7.91321	7.88078	5.41814	5.2417	5.78382	3.95203	3.35978	4.6105	3.60912	3.69512	3.5318	4.0873	3.89726	3.66622	3.5425	3.46016	3.84406	4.17624	3.53262	3.89422	4.04137	4.09729	4.05162	3.23432	3.36533	3.17064
CC2G_000339	5.38524	5.50389	5.92089	4.60791	6.19775	5.53972	6.10836	6.22489	6.18434	6.23197	6.40183	6.37223	6.30111	6.39624	6.64104	5.8816	6.0172	6.19494	6.07633	5.9022	5.94084	6.35914	6.55323	6.46096	5.67983	5.55214	5.3368
CC2G_000340	1.25598	1.19301	1.45585	2.11792	0.709386	0	0.21743	0.412428	0.655293	0.581417	0.466791	0.907104	1.03094	0.489277	0.546854	0.467151	0.416963	0.585951	0.307087	0.322199	0.432569	0.612809	0.486941	0.666326	0.856533	0.382322	0.856451
CC2G_000342	7.57083	6.4299	6.60746	6.94175	6.94182	6.97361	5.25121	5.11912	7.42542	6.18354	6.42767	6.60686	6.36251	6.63681	6.29229	7.43839	7.27621	7.57027	7.05791	7.37149	7.32583	5.95372	6.18939	6.17586	7.73946	7.2101	7.50186
CC2G_000343	1.99645	3.06973	3.15762	2.11792	0	1.86343	1.09668	1.10985	3.05839	2.7685	2.42387	2.72831	2.62459	2.93223	2.89774	2.15101	2.13718	2.09913	2.96711	2.70159	2.78356	1.99964	1.74479	1.91649	7.73809	7.61254	7.90701
CC2G_000344	2.63988	4.50501	4.45406	2.94136	2.06196	2.79434	1.84902	2.10743	4.05892	4.58757	4.1051	4.07725	3.9869	4.75863	4.43464	2.77503	3.3357	2.855	4.43543	4.10456	4.80933	3.30442	3.38726	3.41403	9.51576	9.40873	9.68195
CC2G_000345	5.91336	5.05125	4.72003	5.67554	5.56568	5.78382	6.422	6.45997	6.83802	6.93529	6.96826	6.93562	6.91987	6.74317	6.92784	6.91835	7.06084	7.34279	7.07895	7.01327	6.87062	4.91488	5.07184	5.09566	3.12126	2.92115	3.3817
CC2G_000346	5.11879	4.92713	5.09257	6.61294	6.41733	6.37157	6.7312	6.93409	7.18298	6.88684	7.24804	7.6524	6.6591	6.4448	6.43841	7.58679	7.48106	7.76782	7.37536	7.43232	7.46413	3.60558	3.37933	3.83135	3.67298	3.10198	3.69555
CC2G_000347	2.27635	1.83697	2.00394	2.94136	2.7476	2.65018	2.90812	2.89782	2.98171	2.25031	2.95744	3.20986	2.32894	2.10017	2.09892	3.37029	3.38942	3.44748	3.12254	3.12014	2.94511	0.371859	0.363748	0.457922	0.38295	0.382322	0.266211
CC2G_000348	4.58899	4.55521	5.11912	5.57802	6.12084	5.477	5.40312	5.32964	6.89837	6.39034	6.72724	6.90132	6.37379	6.34188	6.34845	8.08773	8.03161	7.874	7.61066	7.81913	7.96207	6.0284	6.011	5.96157	5.77634	5.88899	6.11882
CC2G_000349	4.81926	4.03874	4.28844	7.40688	7.47731	7.42507	7.5761	7.32648	6.14971	5.94703	5.79781	5.89375	6.13358	6.316	6.09727	7.65992	7.56734	7.24665	6.35766	6.51605	6.33792	6.28601	6.24935	6.06178	5.67697	5.7576	5.39354
CC2G_000350	4.33026	3.80979	3.41505	6.48427	6.46997	5.49821	9.30257	8.98955	5.75973	7.19398	6.81447	6.89905	6.55699	6.67965	6.6226	5.96092	6.72708	6.46691	6.26836	6.26812	6.52755	6.93443	6.97235	6.87255	6.08709	6.43747	5.87412
CC2G_000351	8.32284	8.9748	9.11556	7.19298	7.82313	7.45792	7.85683	7.66554	6.23202	6.98781	5.97724	6.39062	6.23983	7.40542	6.54372	7.35709	7.32397	6.98846	6.72501	7.11704	7.41965	6.81217	6.67726	6.7866	4.68514	4.88377	4.71311
CC2G_000352	5.17531	5.4781	5.49868	2.11792	1.5387	1.86343	0.723026	0.732788	2.00663	0.942409	0.86286	0.858186	1.16484	1.59393	1.25259	1.81261	1.67905	1.50442	1.00585	1.39316	1.45847	2.8894	2.98909	2.94937	1.64526	1.85989	1.7357
CC2G_000357	0.617261	0.402256	0.212222	0	0	0	0.406341	0	0.781292	0.360207	0.408664	0.459556	0.581914	0.365566	0.428327	0.819467	0.654876	0.585951	0.560142	1.00068	0.993226	1.58464	1.21358	1.78862	1.21248	1.59594	1.5485
CC2G_000358	2.4272	2.28062	2.26403	0	1.18283	0	2.24525	1.49574	2.19955	1.96606	1.74277	1.97762	2.60115	2.11945	2.03951	2.89642	2.6365	2.63992	3.04174	3.04558	3.07049	3.69345	3.72423	3.81503	3.56595	3.72668	3.69555
CC2G_000354	4.86756	4.1343	4.04703	0	2.99751	3.2594	2.47365	2.49389	2.40926	0.360207	0.678375	1.0877	1.37288	1.21821	1.02646	1.27516	1.10364	1.15363	1.47459	1.17068	1.36365	5.98486	5.86531	5.95909	4.0711	4.82321	3.77245
CC2G_000355	6.92181	6.6164	6.49029	6.11861	5.28934	6.02213	8.17366	8.21437	5.85953	5.76526	5.80205	5.51417	6.16589	5.96142	6.01612	5.89755	6.07571	6.15605	6.03126	5.50117	5.49171	5.79471	5.99292	5.96527	6.95326	6.8555	7.08167
CC2G_000356	8.00011	7.42691	7.48096	10.6599	11.0261	10.7838	11.5173	11.5436	9.13145	10.3243	10.0617	9.97639	10.0944	10.1859	10.048	9.58915	9.86625	9.35009	9.33359	9.50294	9.75374	9.91513	9.83052	9.84359	8.02637	8.41299	7.78771
CC2G_000367	0.971684	1.70089	1.94579	0	0	0	0	0	0.364536	0.191317	0	0	0	0.0808996	0	0.149585	0.0674644	0	0.161699	0	0.232436	0.719702	0.486941	0.666326	0.773445	0.265787	0.856451
CC2G_000365	2.27635	2.23207	1.37	0	2.7476	2.79434	1.47988	0	2.40926	4.10146	3.74295	3.02277	3.1046	2.36535	2.85242	0.863446	0.564363	0.831372	0.307087	0.858588	0.813558	3.88937	4.11172	3.98024	3.86581	4.34475	3.94371
CC2G_000366	6.918	6.07133	5.96548	4.87754	4.37075	4.87609	3.79183	4.04906	4.57614	6.19475	6.10513	5.44132	5.77629	5.05492	5.64798	1.24223	1.31271	1.50442	2.22549	2.13033	2.79572	7.51939	7.42215	7.32076	8.46285	8.37789	8.61584
CC2G_000359	0.279274	0	0.397192	0	0	0.730907	0.406341	0.732788	0	0	0.408664	0.248	0.261511	0	0.546854	0	0	0.1523	0.161699	0.170075	0.432569	0.866515	1.0633	1.15537	0.685278	0.772326	0.382908
CC2G_000361	3.0277	1.55062	1.07676	5.30077	5.42348	5.11452	6.42746	6.49215	5.76355	5.79504	5.82861	5.78672	6.05383	6.03813	6.64602	4.53807	4.63465	5.16163	4.77241	4.58626	4.69064	6.39487	6.47447	6.49721	5.30405	5.27528	4.97719
CC2G_000362	7.83449	8.11327	8.16909	7.10819	7.23122	6.75313	7.37873	7.33685	7.60976	7.81184	8.01761	7.9902	7.84294	7.71202	8.10904	7.91988	8.01462	8.08125	7.72385	7.90372	7.82309	8.20409	8.30134	8.29997	8.43693	8.48766	8.46557
CC2G_000363	0.400949	0	0	0	0	0	0.858618	0.412428	1.36797	1.27385	0.726755	1.3222	0.803435	1.21821	1.10584	0.467151	0.654876	0.918933	0.617031	0.907523	0.993226	0.91231	0.705653	0.931472	0.266241	0.684258	0.490867
CC2G_000364	4.70576	3.89022	4.06079	4.70349	4.65157	3.68642	2.99899	1.79989	5.03409	6.88164	6.10399	5.85064	5.67752	5.67749	6.05539	3.82978	3.95472	4.38748	4.57478	4.23969	5.15436	6.98687	6.9056	6.75344	8.13905	8.50222	8.30198
CC2G_000374	1.25598	1.19301	0.397192	0	0	1.21373	0.406341	0.581482	0.193751	0	0	0	0	0.157503	0	0	0	0.1523	0	0	0	0.556239	0.654004	0.666326	0.773445	1.38865	0.685209
CC2G_000368	4.37549	4.14745	4.1791	2.94136	4.49785	3.95541	3.19109	3.72729	4.03382	4.22147	4.54021	4.55503	4.21243	4.06574	4.42693	5.19654	4.9393	4.92305	5.06342	4.99849	5.06427	4.01537	3.80341	4.12847	4.50371	4.30839	4.76779
CC2G_000369	4.73499	3.87449	3.91685	4.14595	3.90423	4.01549	3.16516	3.44992	4.42023	4.51784	5.00488	4.99762	4.5941	4.43619	4.57725	5.33574	5.08885	4.93623	5.46505	5.63614	5.62885	4.4895	4.60881	4.50589	4.74634	5.09063	5.11433
CC2G_000370	5.25816	5.15906	4.78781	3.84426	3.96417	4.28326	2.67079	2.65416	3.39045	3.84806	4.15898	3.85841	3.61217	4.08548	4.09371	4.0879	4.12668	4.45861	4.57478	4.66664	4.58252	3.86628	4.22667	4.02822	4.94451	5.21763	5.38307
CC2G_000375	2.30781	0.71646	0.561119	2.11792	0	1.86343	1.47988	1.57799	2.6263	2.93826	2.57687	2.42664	2.65904	2.66993	2.51707	2.38022	2.36876	2.58743	2.22549	2.34094	2.32792	4.56671	4.44752	4.45414	5.52016	6.67163	5.92312
CC2G_000376	1.25598	1.62771	1.07676	0	1.18283	0	2.03229	1.21642	2.00663	1.64482	1.17329	1.3926	1.6491	1.86914	1.64692	1.98177	1.72156	1.94079	1.89836	1.97829	1.92489	2.73231	2.86964	2.86734	3.03471	3.53858	2.86433
CC2G_000377	0.714357	1.0878	0.708306	1.41702	1.18283	1.57485	1.30097	0.994777	0.517227	0.511383	0.408664	0.644021	0.674642	0.365566	0.708172	1.13865	0.780815	1.07956	0.775363	0.807935	1.03485	1.46682	1.24882	1.3186	3.01676	3.21629	3.47667
CC2G_000378	6.3224	6.8333	6.97221	0	1.82392	2.79434	1.97375	2.26472	2.75475	2.72275	2.75071	2.82057	2.85999	2.87667	3.06598	3.69632	3.63156	3.68456	3.55258	3.48505	3.30121	4.48572	4.41298	4.6447	6.91015	7.03979	6.99723
CC2G_000379	3.37819	3.57694	3.25662	2.94136	2.99751	2.79434	4.31242	4.14663	2.98171	3.54045	3.46493	3.30419	3.53388	3.84611	3.71767	2.25373	2.61411	2.95159	3.08271	2.88381	3.1389	3.90644	3.88408	3.93566	2.2782	2.84195	2.71649
CC2G_000380	4.96942	5.69959	5.86315	2.94136	4.49785	4.42291	5.79841	5.7798	4.67686	4.58331	4.30952	4.39275	4.51793	4.57881	4.7102	4.44707	4.795	5.09974	4.07327	3.6451	4.08957	4.72906	4.60201	4.63544	2.88443	2.88209	2.99842
CC2G_000383	3.58491	3.55737	3.15762	3.46232	3.39597	3.89271	3.08447	2.49389	3.26664	2.93826	2.91631	3.03382	2.67034	2.89915	2.65542	2.92783	2.92724	3.51928	3.08271	2.85915	2.91198	3.82498	3.50854	3.73634	3.60251	3.60004	3.7831
CC2G_000381	8.39005	8.41661	8.56407	7.42101	7.28509	7.14478	7.29304	7.29033	7.02954	5.58308	5.51749	5.757	5.66627	6.24097	6.18556	7.11024	7.38722	7.33684	6.73869	6.7687	6.6623	7.21698	7.30146	7.23239	7.88819	7.85557	7.80088
CC2G_000382	3.70791	3.671	3.51842	6.51093	5.92363	5.22043	7.6209	7.49342	5.16123	6.39156	5.6267	5.53767	5.52553	6.48994	5.86602	4.97139	5.63758	5.09739	5.94362	5.72414	6.25998	5.08949	5.01923	4.91095	3.13796	2.95917	3.18678
CC2G_000387	6.81092	5.74355	5.78237	6.48427	6.30594	6.37157	5.22007	5.25034	6.59584	6.30494	6.64466	6.77277	6.54935	6.33982	6.75084	6.46062	6.45842	6.47053	6.86002	6.89009	6.73986	7.55366	7.76073	7.73233	10.7718	10.7358	10.7004
CC2G_000394	4.43368	4.09412	4.06079	5.76688	5.28934	5.16845	5.38639	5.71311	5.351	5.23211	5.30291	5.08525	5.171	5.25992	5.21647	5.29015	5.29289	5.56938	5.11864	5.0209	5.10392	4.66362	4.75387	4.8212	4.04477	4.18545	4.17979
CC2G_000395	7.95177	10.6437	10.694	3.84426	3.90423	2.1038	3.80867	3.10622	3.59306	4.56181	4.22783	5.32687	4.4342	5.10413	5.42624	7.77016	7.87449	7.15551	6.82724	7.86088	7.13087	3.54145	3.70533	3.68937	2.69423	2.54967	3.3676
CC2G_000388	7.67175	5.1848	5.25704	7.03657	6.43862	6.52413	8.2318	8.44968	6.78447	7.75852	7.73231	7.77524	7.59228	7.73173	7.78503	7.019	7.61357	7.49391	7.72142	7.68039	7.72279	6.56401	6.60855	6.6197	6.61885	6.88666	6.6142
CC2G_000389	8.29662	7.21531	7.38847	4.60791	5.65931	4.7042	5.03205	5.04151	5.50048	5.67404	5.2418	5.30423	4.53039	5.70646	5.45684	5.89093	6.36263	6.48406	6.49774	6.18621	7.07585	5.59154	5.7639	5.76605	5.71086	6.16595	6.07178
CC2G_000390	7.2058	7.21531	7.27201	4.39534	5.96822	5.49821	5.56554	5.48695	5.38117	5.15382	5.23345	5.246	5.33979	5.25557	5.37308	5.81036	5.67861	5.59286	5.22082	5.3142	5.18935	4.95099	5.06691	4.85352	6.65412	6.42903	6.73714
CC2G_000391	5.38155	4.54531	5.00272	4.27603	5.21727	4.66722	2.03229	2.9605	5.59361	5.97331	6.4638	6.43924	7.14976	6.7299	6.96024	5.67037	5.62224	5.77843	6.50341	7.06001	6.84305	5.83836	6.20965	5.93161	5.82873	5.97502	6.42302
CC2G_000399	0	0	0	0	0	0	1.3932	1.31566	1.10425	1.91273	1.20778	1.55489	1.50502	1.5661	1.18108	1.56877	1.47057	1.11707	0.918025	0.755439	1.11467	0.234393	0.156663	0	0	0	0
CC2G_000398	6.563	5.22876	5.45244	6.04752	5.11523	5.80099	6.61869	6.57961	5.82702	6.12171	6.27641	6.26255	6.48439	6.14429	6.42008	5.96345	5.92244	6.22531	6.75621	6.68258	6.43049	5.95509	5.78205	5.9379	6.17267	6.22762	6.66406
CC2G_000400	7.28499	7.52336	7.63267	8.74912	8.91412	8.8847	9.66162	9.65281	8.60765	7.528	7.43892	8.6101	7.7065	8.15103	7.75763	9.64199	9.12104	8.62785	8.43124	8.61951	8.87626	7.05289	7.17318	7.00792	7.91872	8.13688	8.54089
CC2G_000401	6.6205	5.96022	6.04034	7.42101	7.85909	7.46871	9.58026	9.53032	6.57859	6.91847	7.02921	6.7377	7.16932	7.22474	7.19049	6.23125	5.95063	5.78427	6.39677	6.43597	6.10372	6.4989	6.53461	6.43717	6.94972	7.18925	6.90021
CC2G_000402	1.18999	0.567895	0.561119	2.58761	0	2.1038	3.05653	3.13368	3.24493	2.6594	2.64138	2.78175	2.94622	2.92129	2.69447	3.42268	3.0407	3.09008	3.05209	3.29584	3.05034	3.91771	3.9008	3.9606	1.33344	1.54684	0.591308
CC2G_000403	7.32493	7.75039	7.83746	6.18635	6.3738	6.25179	7.39695	7.30701	6.5937	6.93445	7.19475	7.02698	7.25111	7.04927	7.25721	6.82482	6.70673	6.73538	7.13602	7.18001	6.8913	7.15166	7.25346	7.29452	7.38272	7.37125	7.27999
CC2G_000404	4.35305	3.72462	3.37153	6.01062	5.86195	5.91579	8.02752	8.0036	5.62336	5.98628	5.79497	5.65687	5.92527	5.99181	6.12135	4.74325	4.58371	4.93623	4.66522	4.64154	4.08463	6.16117	6.22964	6.10605	6.27439	6.46581	5.91103
CC2G_000405	4.89888	5.2472	5.11912	4.27603	4.27933	4.46662	6.62584	6.38484	4.23442	4.46786	4.42765	4.13486	4.79336	4.66989	4.65188	4.32655	4.41914	4.67527	4.86633	4.37633	4.30052	4.75128	4.91886	4.81301	5.13961	5.04716	5.12693
CC2G_000406	4.61437	4.57481	4.40094	4.60791	3.63598	4.87609	5.88037	5.77545	4.41051	4.65408	4.56038	4.5396	4.70818	4.8851	4.73538	4.03119	3.79472	3.9043	4.4275	4.48107	4.1665	5.87206	5.87522	5.73024	4.96338	4.7972	4.5604
CC2G_000407	6.78461	5.69063	5.55812	6.21907	5.78094	6.31292	7.93754	8.02941	6.17002	6.57226	6.55371	6.44132	6.74447	6.6982	6.86077	6.26341	6.22721	6.40381	5.85623	5.58441	5.5752	5.80233	5.63995	5.80375	5.55789	5.07772	5.6825
CC2G_000408	7.2671	7.57172	7.60005	8.87764	9.09925	9.64601	9.44372	9.37972	7.98525	7.27216	7.20065	7.00888	7.372	7.34427	7.27449	6.60524	6.46155	6.31883	6.48633	6.39043	6.10495	6.70972	6.71162	6.52423	6.38698	6.5177	6.22425
CC2G_000409	3.49211	4.70502	4.48501	2.11792	2.44513	2.49	2.63346	1.99216	2.244	2.93826	2.57687	2.76857	2.54084	2.96457	2.75728	1.56877	1.86118	1.44666	3.22675	2.78252	2.48633	2.28719	2.16945	2.08927	2.39399	2.15022	2.90393
CC2G_000410	6.05217	6.62112	6.48008	5.41814	5.19243	5.22043	5.16226	5.04151	5.26194	5.68998	5.85334	5.5929	5.9335	5.6562	5.71913	5.5222	5.44966	5.30057	6.05204	5.94824	5.91877	5.6177	5.86673	5.65889	7.30719	6.87924	7.78241
CC2G_000411	6.16383	4.68712	4.95192	6.45709	6.69888	6.21383	6.64707	6.7311	7.28489	7.0299	7.49978	7.51418	7.50461	7.23472	7.48352	7.7033	7.56661	7.73841	7.67529	7.78516	7.39139	7.90676	7.92192	7.97686	6.41808	6.62064	6.3225
CC2G_000412	6.06373	5.81533	5.7445	6.04752	6.59844	7.13127	7.31237	7.01568	6.0717	6.36823	6.25596	6.0625	6.13256	6.17686	6.30916	5.18792	5.37174	5.61434	5.28805	5.37419	5.23694	6.06054	5.91553	5.94291	5.25129	5.40148	5.18836
CC2G_000413	1.95731	3.65267	3.41505	4.60791	4.07705	4.37785	2.96933	3.13368	7.17869	6.50965	6.58849	7.43352	6.79247	6.57531	7.1973	8.93376	8.29306	8.19497	9.09428	9.43975	9.22793	5.13124	5.43718	5.09791	4.89623	4.96077	5.39701
CC2G_000414	0.400949	0.851145	0	0	1.18283	0	0.858618	0.869721	1.19762	1.50765	1.74277	1.24819	1.53006	1.35461	1.18108	1.20852	1.03788	1.44666	1.00585	0.858588	0.60829	1.19767	0.755516	1.01003	1.39032	0.684258	1.33333
CC2G_000426	5.30178	6.06442	5.82736	2.94136	2.26623	2.30978	0.982555	1.72965	1.28531	1.39548	1.85585	2.19018	1.93808	1.35461	1.67322	1.89966	1.89871	1.98203	1.50505	1.49273	1.78553	8.03359	8.22597	8.17367	9.66261	9.76713	9.75398
CC2G_000427	6.86082	6.41094	6.35439	5.41814	5.60387	5.83474	6.49926	6.59203	5.61492	5.43962	5.67064	5.6764	5.71757	5.65124	5.68561	5.42282	5.50242	5.5455	5.69052	5.33	5.33808	6.35293	6.30692	6.35113	5.82615	5.66573	5.8791
CC2G_000428	5.46763	5.24108	5.2084	6.28236	5.90845	6.10742	6.4329	6.37624	6.69724	6.56039	6.53431	6.74948	6.47637	6.6982	6.47531	6.71433	6.93723	6.81029	6.68732	6.52098	6.58385	5.95919	5.85677	5.85253	6.58118	6.28676	6.56565
CC2G_000429	6.83811	7.4188	7.37477	5.6276	6.39573	7.35704	3.93679	3.7452	5.4492	4.07743	3.88295	3.55501	3.7464	4.10978	3.68573	4.46502	4.45107	4.61099	4.78177	4.43174	4.43486	5.28057	5.33018	5.36963	4.38279	4.40798	4.71867
CC2G_000415	6.36227	5.89545	5.92466	7.28856	7.31992	6.6992	7.52223	7.48811	6.53229	6.33313	6.37742	6.59757	6.55623	6.57619	6.89329	6.55835	6.68206	6.61846	6.54431	6.57404	6.48407	5.3878	5.33018	5.3973	3.74016	4.31573	3.90521
CC2G_000416	5.46065	6.23117	6.07127	4.14595	5.08855	4.07317	6.91355	6.6738	4.03382	4.51336	4.32138	4.36676	4.42756	4.69581	4.47257	3.82978	3.92775	3.76946	4.20899	4.14594	4.27903	4.80385	4.82565	4.70793	3.56595	3.8633	3.63801
CC2G_000417	5.31731	4.5253	4.42242	3.22523	3.96417	2.65018	5.93509	6.14955	5.17851	4.90001	4.9371	4.88002	4.98208	5.06738	5.58877	2.80916	3.25842	3.93087	3.70468	3.78262	3.89986	5.31933	5.40434	5.36029	3.57824	3.42089	3.48974
CC2G_000418	2.58958	3.47632	3.20797	2.11792	1.18283	1.21373	2.8442	2.31356	2.10631	2.54136	2.43847	2.62974	2.4779	2.56134	2.85242	2.76347	2.55657	2.70295	2.79289	2.65935	2.55946	2.83098	2.49712	2.87785	0.685278	1.27265	0.935008
CC2G_000419	3.27055	4.33153	4.14074	3.22523	2.44513	1.86343	3.13876	2.89782	3.32987	3.50485	3.62026	3.39273	3.42465	3.61437	3.98768	3.76169	3.59773	3.58098	3.88921	3.65946	3.65492	3.79473	3.52301	3.92556	1.69126	1.07902	1.33333
CC2G_000420	6.32047	4.62267	5.03794	4.95727	4.75699	4.77543	7.16481	7.24069	4.73252	5.37699	5.04359	4.87696	4.80623	4.94845	5.31162	4.7637	4.9393	5.3087	4.78488	4.54819	4.64769	5.46665	5.59443	5.4064	4.17996	4.37319	4.52274
CC2G_000421	7.96724	7.28538	7.44861	6.15288	6.51073	5.99254	7.86289	7.93892	6.52105	6.46055	6.82075	6.75116	6.83264	6.50468	6.89469	6.7875	6.93723	7.00106	6.51842	6.34341	6.14589	6.73702	6.86074	6.94683	5.38325	5.7576	5.20033
CC2G_000422	7.04826	6.43527	6.73313	8.93784	8.85993	9.00628	9.81251	9.95701	8.66395	8.36286	8.61485	8.76367	8.68835	8.89526	8.68974	8.87202	8.65684	8.56943	8.21966	8.29194	8.27648	9.69403	9.76708	9.81105	9.22709	9.45271	9.18985
CC2G_000423	6.43708	6.16806	6.30029	5.17301	5.56568	5.99254	6.49145	6.35014	5.26194	4.97348	4.98761	4.57408	5.08914	5.17264	5.05334	5.25343	5.10298	5.10441	4.56397	4.24446	4.27469	4.4705	4.73845	4.58501	3.71811	3.98809	3.79368
CC2G_000424	4.17686	4.1343	4.24087	6.66135	6.73373	6.87165	8.18338	8.08233	6.22094	5.4254	5.63939	5.63344	6.66759	6.73538	5.99542	6.45255	6.03099	5.92575	6.00352	6.24926	6.05524	6.19977	5.80295	6.17373	7.28767	7.23259	7.22437
CC2G_000425	8.27738	9.52725	9.69773	8.20447	8.25669	8.62268	6.80231	6.85793	6.87559	5.87739	5.5665	5.89223	6.32902	6.92809	5.95312	6.81015	6.80883	6.577	6.83401	6.85855	6.95773	5.72745	5.72532	5.5982	3.95335	4.38022	4.49059
CC2G_000446	0.714357	0	0	2.58761	2.60428	1.86343	1.63904	1.49574	0.655293	0.511383	0.576459	0.644021	0.581914	0.230242	0.428327	0.576887	1.16653	0.785514	0.962607	0.755439	0.552061	1.26981	0.981853	1.15537	0.856533	0.590463	0.382908
CC2G_000430	4.53019	7.4215	7.42751	5.36065	5.42348	4.66722	5.60946	5.19276	4.55865	4.95381	4.7361	4.84906	4.67208	5.11378	4.63526	4.77526	4.49154	4.16826	5.25707	5.37636	5.52496	6.68024	8.00929	6.42467	8.80667	8.60548	9.29528
CC2G_000431	5.54557	5.24108	5.26895	5.03282	5.06137	5.2706	7.72217	7.71864	5.12008	5.70771	5.05547	5.05301	5.17497	5.67749	5.43587	6.0385	6.30265	6.28524	5.59817	5.64699	6.04637	5.74969	5.60127	5.71273	4.15556	3.98809	4.33994
CC2G_000432	5.19226	6.24347	5.85132	5.52667	5.06137	5.22043	5.32916	5.16641	4.25629	4.9472	4.40924	4.57787	4.62638	4.98832	4.3597	4.53468	4.71574	4.30049	5.11617	5.05116	5.34844	5.0232	4.8198	4.79371	4.61529	4.20932	4.28851
CC2G_000433	7.74468	7.01107	7.22082	6.79756	6.94925	6.82204	6.17807	6.25333	7.04846	6.34953	6.73539	6.77194	6.58414	6.58401	6.59793	7.44293	7.34918	7.26921	6.8754	6.91946	6.83055	6.40691	6.61532	6.55894	6.8844	6.72915	7.00976
CC2G_000434	3.63538	3.22665	3.30369	7.27306	7.61455	8.09164	6.74001	6.61413	6.25935	5.80422	5.38998	5.1878	5.41731	5.83447	5.35492	5.13955	5.26083	4.80447	6.06103	5.9886	6.19261	5.66528	5.9614	5.79684	8.94391	8.67782	8.78079
CC2G_000435	3.50574	3.6153	3.2325	4.79314	5.03366	4.55023	5.33499	5.34147	4.9291	5.41345	4.99503	4.86772	4.89322	5.59554	5.21423	4.61083	5.28936	5.10208	5.07362	4.78594	4.94924	4.56313	4.58142	4.77976	2.98017	3.23191	3.42317
CC2G_000436	2.56375	2.01968	1.88519	2.58761	3.96417	4.18203	5.83587	5.8477	3.00773	3.18315	2.45292	2.24829	2.86983	3.16341	3.07587	1.42942	2.34177	1.85459	2.65027	2.35864	2.16875	1.43579	1.28322	1.25551	1.08044	0.265787	0.266211
CC2G_000437	7.62725	6.88328	6.94464	6.99939	7.00024	7.65966	8.68151	8.65193	6.70521	6.72994	6.58111	6.41196	6.60269	6.63262	6.9569	5.63434	5.62923	5.94543	5.84734	5.46689	5.51947	6.50545	6.66264	6.51247	5.10604	5.53964	5.01836
CC2G_000438	4.47584	3.82624	3.87071	0	2.26623	0	4.01144	3.95983	2.92823	3.24919	2.98753	3.0004	3.50891	3.50867	3.33667	2.92783	3.09828	3.05185	3.47005	3.39354	3.2042	3.86628	3.61367	3.47069	2.2782	1.81912	1.7357
CC2G_000439	8.47304	8.62896	8.66327	7.12555	7.09041	6.57493	8.29293	8.14016	6.58076	6.76798	6.98079	6.83334	7.10829	7.13287	7.33905	7.01169	6.8856	6.82027	6.71608	6.70005	6.32539	6.52861	6.24717	6.51415	7.79581	8.05365	7.60156
CC2G_000440	5.05069	4.02456	4.22872	6.18635	5.78094	5.78382	5.0392	4.99736	6.28351	5.33453	5.72077	6.03525	5.22566	5.50315	5.5107	6.45614	6.28327	6.21778	5.54602	5.78105	5.67565	5.13365	5.2411	5.35277	5.08466	4.97939	5.09307
CC2G_000441	4.15108	3.671	3.68766	4.00298	2.99751	3.2594	3.68641	3.23857	4.70893	4.79707	5.02194	5.28585	4.87379	4.69259	4.68457	5.15291	5.16782	5.17725	4.86045	4.95259	5.06928	5.43563	5.43909	5.36963	4.42423	4.63048	4.22739
CC2G_000442	7.16987	7.69773	7.70458	5.03282	5.35797	5.86771	6.78964	6.6359	5.37618	6.00551	6.24042	5.95319	6.12128	5.58344	5.70167	6.44533	6.128	6.12417	5.54602	5.72243	5.48046	5.50825	5.61821	5.52317	6.119	6.27926	6.23593
CC2G_000443	4.81926	5.1848	5.64292	6.28236	5.35797	5.94698	4.65743	4.07761	4.97598	4.77109	4.52319	4.4267	4.58815	4.46285	4.38379	5.09413	5.05393	4.86911	5.27264	5.54822	5.62204	4.41987	4.27875	4.32565	4.41055	4.56418	4.48408
CC2G_000445	7.09521	7.16447	7.17409	6.56284	6.29431	5.96233	6.65407	6.88242	6.54123	6.24147	6.48944	6.51714	6.60564	6.57444	6.4451	6.76158	6.6834	6.56432	6.61584	6.64068	6.5321	6.40791	6.24499	6.36894	5.61269	5.56144	5.73009
CC2G_000444	0.279274	0.402256	0.561119	1.41702	2.44513	1.57485	0.573356	0.412428	2.32899	2.09137	2.13215	2.26715	1.75907	1.35461	1.50771	0.947576	0.740045	0.960797	1.94354	2.00102	1.76093	1.61265	1.74479	1.15537	0.773445	0.855326	0.856451
CC2G_000448	6.51158	6.55111	6.56221	6.79756	7.44086	7.11763	5.57542	5.80136	6.34602	5.97819	6.13233	6.26724	6.06136	5.90421	6.40152	6.84758	6.61176	6.5711	6.828	7.14281	6.85835	5.91769	6.12683	6.07669	6.90772	6.93397	6.9788
CC2G_000450	6.24326	6.99843	7.1867	6.01062	6.23472	6.32484	5.67523	5.67156	5.27271	5.34966	5.18665	5.22203	5.19468	5.07234	5.02042	6.44533	6.41699	6.24027	5.76163	5.92614	5.82845	3.92889	3.79151	3.79298	3.81478	4.24053	3.75089
CC2G_000451	6.88188	6.78784	6.79002	3.84426	4.75699	4.66722	5.25121	5.00481	4.71683	4.65001	4.61281	4.88614	4.84665	4.87663	4.61505	5.50668	5.31214	5.25081	4.97641	5.16873	4.8881	4.83093	4.85454	5.03354	5.6037	5.46892	5.59448
CC2G_000452	4.04307	4.45301	4.44359	5.81047	6.0396	5.78382	5.70253	5.90857	5.64838	5.49056	5.50541	5.50824	5.53329	5.5554	5.65789	5.69796	5.74451	5.69251	5.58753	5.4811	5.66741	6.0297	6.04147	5.99334	6.06761	5.98427	6.19062
CC2G_000454	6.60634	8.35135	8.30686	5.41814	4.88654	4.7042	3.77479	3.28828	5.01498	4.81172	4.75955	5.11158	4.86889	4.77999	5.04329	5.06618	5.0372	5.16163	5.06598	4.96709	4.92731	4.81294	4.82565	4.84283	4.10548	3.95083	3.80418
CC2G_000455	6.85285	5.88371	5.86315	5.23831	5.64106	5.45547	5.60946	5.6809	5.46806	5.04958	5.22294	5.51812	5.27832	5.55008	5.80042	6.50728	6.39582	6.32084	5.62095	5.95988	6.00114	5.61597	5.75473	5.70537	4.21187	4.47513	4.60913
CC2G_000456	5.50882	4.75742	4.77951	3.84426	2.06196	2.9254	4.98094	5.13279	4.09577	4.59181	4.54021	4.97772	4.5148	4.42849	5.12416	4.138	4.56341	5.09974	4.48975	4.33668	4.25281	5.0101	4.84305	5.07296	2.84428	3.36533	2.88427
CC2G_000457	8.00011	8.04025	8.11156	7.36364	7.40887	7.33951	9.94674	9.89368	6.80502	7.89756	7.54601	7.3602	7.58745	7.98426	7.87629	6.88273	7.50255	7.46647	7.56711	7.29998	7.47882	7.51615	7.39586	7.48748	7.47846	7.48395	7.41459
CC2G_000541	6.72905	6.81694	6.93533	6.88171	7.64233	7.52146	5.52024	5.59954	7.27556	6.91509	7.05786	7.20319	6.86497	7.0499	6.99909	8.0629	7.98575	7.80241	7.41951	7.52442	7.58815	6.29576	6.35926	6.22712	7.79252	7.513	7.96139
CC2G_000542	5.51893	5.4251	5.3384	3.46232	4.18173	4.66722	2.99899	3.02057	5.0021	4.36737	4.75372	4.81101	4.77253	4.7617	4.85796	4.85094	4.85828	4.73982	5.00067	4.887	4.89376	4.56313	4.59518	4.75431	5.95429	5.45236	5.87661
CC2G_000543	2.24419	2.37308	2.11366	0	1.18283	0.730907	0.406341	0.869721	2.15368	2.4693	2.56361	2.89521	2.85999	3.84031	3.20766	3.65937	3.06566	2.84385	2.79289	2.35864	3.10021	3.09202	2.75174	2.96917	3.30998	3.01439	3.3676
CC2G_000544	0.617261	0.215102	1.18127	0	1.5387	2.1038	1.30097	0	2.28712	1.47122	1.83393	2.6586	2.13043	1.97876	1.64692	2.59109	2.18353	1.8322	1.94354	1.75584	2.31107	0.234393	0.486941	0.341223	0.685278	0.139006	0
CC2G_000545	0	0.974322	0	0	0	1.57485	0	0	0.655293	0.773174	1.02641	1.28567	0.883322	0.807195	0.656378	0.678863	0.933267	0.831372	0.500916	0.248141	0.764914	0.719702	1.14039	0.512912	0	0.490143	0.591308
CC2G_000546	7.68079	6.61166	6.88978	6.48427	6.66316	6.61432	7.31679	7.17613	7.21961	7.12823	7.53374	7.56413	7.25909	7.20908	7.31889	7.46183	7.49835	7.54941	7.6444	7.43389	7.33106	7.32674	7.44227	7.49902	7.81606	7.70286	7.80154
CC2G_000547	6.06373	6.30344	6.30897	5.72193	5.98278	6.61432	5.13581	5.17965	5.84156	5.57881	5.64727	5.617	5.51773	5.62281	5.63298	6.27465	6.22721	6.28627	5.78509	5.94531	6.02329	5.36121	5.54567	5.53816	7.2459	6.52405	6.91482
CC2G_000548	7.58133	7.21375	7.39935	4.95727	5.42348	5.89994	7.60652	7.68539	5.80123	6.10546	5.93282	5.70781	6.22458	6.316	6.30811	5.96092	6.31137	6.32285	6.27058	5.97575	5.9146	5.82345	5.89898	5.87894	3.9151	3.87329	3.67281
CC2G_000549	1.91709	1.55062	1.82193	6.53712	6.17257	6.12116	7.47684	7.22163	4.28848	5.04958	4.97515	4.69044	5.1286	5.03221	4.68134	3.96208	4.3497	3.75763	4.92383	4.63066	4.86232	0.770318	1.28322	0.804982	0.856533	0.855326	0
CC2G_000550	4.61437	5.60267	5.70121	10.0902	10.8135	10.7428	3.87415	3.44992	8.72599	7.51128	6.99752	7.00958	7.7481	8.85611	7.7733	8.81209	8.55603	8.1265	8.18891	8.5569	8.83046	4.50453	4.66534	4.65085	5.73027	5.08634	6.6142
CC2G_000551	6.88449	6.26475	6.28864	6.34299	6.09427	6.17484	5.67982	5.95549	6.80687	6.56796	6.81307	6.79568	6.5901	6.699	6.87783	7.2816	7.11167	7.02222	6.65202	6.77613	6.86414	6.34981	6.41946	6.55567	5.50091	5.76835	5.89638
CC2G_000552	4.76363	3.671	3.47796	4.50553	5.00541	5.00023	4.86494	4.69038	5.03409	4.65408	4.74494	4.87696	4.54582	4.36529	4.80244	4.94605	5.0393	5.16163	4.57836	4.71555	4.78514	3.33837	3.54444	3.41403	3.48991	3.37942	3.2649
CC2G_000460	4.55006	5.65884	5.63834	4.60791	4.61465	4.80977	5.21376	5.35902	4.89466	5.21844	5.33056	5.22686	5.21025	5.32986	5.22982	5.39313	5.33799	5.15488	5.23452	5.1046	5.09657	5.80991	5.89343	5.84318	5.57025	6.28676	6.12929
CC2G_000504	0	0	0	0	0	0	0	0	0.897165	0	0	0	0	0.157503	0	0.678863	0.467788	0	0	0.459801	0.432569	0.866515	0.156663	0.565884	0.266241	0.855326	1.08035
CC2G_000458	1.43759	0.974322	0.964086	4.14595	5.08855	5.477	2.08855	1.93087	3.41009	2.72275	2.26913	2.32229	1.84138	1.53772	2.26376	2.42493	1.89871	2.50494	1.75363	2.02339	1.73591	1.66709	1.6425	1.74334	1.94012	1.85989	1.82092
CC2G_000459	2.75847	2.23207	1.68643	4.27603	4.9766	5.08679	4.51074	4.52397	4.7247	4.85477	4.86868	4.61882	4.99562	4.52561	4.90032	4.7637	4.928	4.89903	4.62765	4.63429	4.46181	4.48572	4.5429	4.51265	3.92476	4.17741	4.07093
CC2G_000461	6.75781	6.50843	6.57426	3.66589	4.45671	4.12863	5.1491	4.84788	4.70893	4.50438	4.41663	4.28584	5.27832	5.24244	4.98936	3.82423	3.80958	3.95697	4.72144	4.63066	4.2616	5.07949	4.89681	4.9338	6.06761	6.51451	6.69684
CC2G_000462	6.01929	5.60267	5.65658	4.14595	5.08855	5.14174	5.71151	5.70398	5.25652	5.13939	5.24387	5.27191	4.97526	5.11858	5.30112	5.26577	5.41447	5.20146	4.98724	5.45047	5.30444	5.29793	5.2257	5.27736	3.32464	3.36533	3.339
CC2G_000463	9.20159	9.09463	9.23229	7.19298	7.53773	7.33951	7.07019	7.00084	6.64847	6.6879	6.73465	6.86154	6.72631	6.81366	6.70935	7.9241	7.81868	7.70762	7.05148	7.3704	7.40386	6.78627	6.76888	6.79771	6.63365	6.82879	6.7467
CC2G_000464	3.04647	3.04184	2.90637	0	1.5387	0	3.24159	2.89782	1.84286	1.57786	1.71905	1.78168	1.73774	1.5661	1.69905	1.71995	1.67905	1.78637	1.20454	1.46029	1.48874	1.23419	1.56071	1.01003	1.64526	1.68939	2.30789
CC2G_000465	6.52837	6.88721	6.74383	6.63735	6.84949	6.37157	7.26433	7.18272	6.43259	6.74909	6.68501	6.75116	6.81046	6.94507	7.2342	6.9242	6.93045	6.82948	6.82498	6.8632	6.83424	7.46569	7.57967	7.54921	8.03587	8.08998	8.04347
CC2G_000466	1.64885	0.974322	1.37	0	3.70786	2.79434	3.49154	3.78037	2.6595	2.55883	2.55023	2.42664	2.80976	2.63016	2.38009	2.2203	1.74235	1.73904	2.31418	2.10956	2.09195	3.13128	2.70174	2.60164	2.18483	2.57438	1.59763
CC2G_000467	2.14318	1.0878	1.27872	5.52667	4.27933	4.42291	6.4329	6.44087	3.59306	2.69142	2.691	3.02277	2.9275	2.87667	2.29796	2.45398	2.52092	2.13614	1.53489	1.61562	2.01084	1.19767	1.0633	0.931472	2.18483	1.44333	2.04998
CC2G_000468	4.07998	2.98437	3.10545	4.60791	4.23136	4.07317	4.18919	4.14663	4.63574	4.69809	4.43858	4.47617	4.36632	4.95652	4.58419	4.44707	4.88657	4.73379	4.89537	4.85929	5.18935	5.5505	5.40043	5.31845	5.85927	5.73859	5.89392
CC2G_000469	11.7737	11.8418	11.9843	11.3378	11.06	11.5615	12.4858	12.6413	10.3123	10.9948	10.8289	10.7159	10.6806	10.876	10.8577	10.6792	11.0584	10.956	10.2864	10.3409	10.6118	10.188	10.1683	10.2864	9.84296	10.238	10.0303
CC2G_000470	6.40107	5.69063	5.98004	6.51093	6.91169	6.83043	5.99519	6.01206	6.64225	6.4559	6.5034	6.51319	6.43306	6.45906	6.53837	6.83935	6.76187	6.80743	6.38248	6.50516	6.48595	6.18702	6.42622	6.25461	6.14608	6.28488	6.05649
CC2G_000471	5.80179	5.7862	5.67907	4.95727	3.39597	3.44562	4.18919	4.00513	4.05892	4.33733	4.37549	4.65149	4.38015	4.39328	4.2195	4.00689	4.03275	4.09965	4.90111	4.71211	4.75433	5.57562	5.44669	5.48758	5.22808	5.16978	4.9538
CC2G_000472	2.33859	2.28062	1.61359	2.58761	1.82392	2.30978	2.96933	2.76366	4.03382	3.86219	3.3918	3.91332	3.61802	4.11939	3.89015	3.47323	4.13457	3.9203	3.8182	3.17113	3.88855	4.08201	4.2044	3.93566	1.14797	1.14649	0.773369
CC2G_000473	6.71739	7.44699	7.26162	8.12901	7.66508	7.41952	8.82916	8.5	6.23202	6.74623	6.21838	6.38199	6.39097	6.8631	6.39955	6.8359	6.94117	6.86299	6.84447	6.49719	6.83571	6.85384	6.69973	6.70113	5.47814	5.96103	5.3619
CC2G_000474	2.2113	2.32759	1.75577	4.39534	3.56033	3.89271	4.51074	4.55476	6.50744	7.5765	6.81656	7.02974	5.51303	5.67749	4.82021	5.47337	5.55772	6.42733	6.6202	6.68082	6.91935	3.56315	3.2891	3.09163	2.05012	2.15022	2.21649
CC2G_000475	5.34031	4.74882	4.81242	5.03282	3.96417	4.74026	5.13581	4.85614	4.61896	5.21844	5.14498	5.1878	5.13881	5.45654	5.22538	4.6801	4.74951	4.72774	5.46505	5.21806	5.45577	4.68026	4.79617	4.61673	4.46452	4.78137	4.76241
CC2G_000476	1.54708	1.0878	0.964086	5.67554	5.62258	5.34273	8.02842	7.5352	4.52301	4.73697	4.21093	4.12971	4.68328	4.94035	4.40748	3.42268	3.24391	3.03235	2.65027	2.0885	2.0721	0.866515	1.02315	1.01003	1.0096	0.684258	1.00951
CC2G_000478	7.99529	7.41608	7.48352	5.36065	5.38014	5.38889	2.19488	2.53565	4.21222	2.45071	1.67041	2.64424	2.13043	2.72131	1.86796	2.67985	2.34177	2.37162	2.34818	1.78232	2.60162	4.41192	4.36961	4.54928	3.05244	2.95917	2.47496
CC2G_000479	3.9564	4.48443	4.54501	6.11861	6.23472	5.80099	6.56269	6.44909	6.21537	5.99111	6.55036	6.58165	6.41301	6.47505	6.72279	6.81506	6.66718	6.62498	6.28711	6.56167	6.34724	7.00481	7.11288	7.07741	4.88638	5.3088	4.89114
CC2G_000480	7.28103	7.96147	7.84841	7.60555	7.44086	7.58727	7.67587	7.8517	6.78259	6.25626	6.54193	6.55792	6.60048	6.56305	6.56055	7.03592	6.96514	6.82666	6.28052	6.33561	6.33584	6.78934	6.76128	6.82445	5.91848	6.1781	6.06525
CC2G_000481	8.92939	10.179	10.0465	6.18635	6.39573	7.08295	6.28125	6.1729	5.37118	3.40216	3.31476	3.77521	3.97783	4.2121	3.10514	5.46269	5.32081	4.87185	4.66185	4.63429	4.64769	3.61253	3.82108	3.37746	4.72991	4.45531	4.71311
CC2G_000482	6.35664	5.96394	5.87098	5.81047	5.42348	5.97751	6.21012	6.2502	5.99575	5.94703	6.01548	5.99197	6.03318	5.96142	5.97706	6.20157	5.89833	5.94412	6.17435	6.09409	6.04891	5.88504	5.96007	6.00896	5.08466	5.24866	4.94433
CC2G_000483	7.31432	7.27643	7.32145	5.76688	6.01147	6.20095	5.79419	5.82682	6.41569	6.80504	6.8572	6.8365	7.10204	7.09867	7.06947	7.19658	7.06446	7.06003	7.577	7.5994	7.6012	7.59198	7.45365	7.50539	6.14815	6.37906	6.13138
CC2G_000484	4.11596	5.05823	5.40466	4.39534	5.73006	5.11452	2.90812	3.21305	5.93604	5.24026	5.38056	5.6425	5.89427	5.95069	6.05038	6.74918	6.51464	6.42919	6.34087	6.57404	6.75473	2.21594	2.13219	2.15988	3.28019	2.77957	3.48974
CC2G_000485	1.59886	2.82982	2.84406	0	0	1.21373	1.20244	1.72965	1.52032	1.79975	1.33807	1.88298	1.67178	1.95749	1.82168	1.17401	1.47057	1.35544	1.98735	1.75584	1.94686	7.89362	7.83218	7.86705	7.12438	7.49613	7.10628
CC2G_000486	5.68984	5.4412	5.30409	5.30077	4.79049	5.05851	6.88206	6.92233	5.91213	5.8368	5.61068	5.60963	5.97739	5.84319	5.92603	6.42346	6.40481	6.45322	6.16842	6.10593	6.01161	5.42382	5.44859	5.50124	4.06238	4.50756	4.19583
CC2G_000487	2.14318	1.70089	1.88519	0	3.48049	0	3.85806	3.59526	5.45394	5.92194	5.81609	5.79649	6.39353	6.48438	6.22276	4.1558	3.93228	4.04718	5.34178	5.26106	4.98949	1.1602	1.14039	1.37905	0.856533	1.07902	0.685209
CC2G_000488	1.04818	0.974322	0.212222	2.94136	1.82392	2.49	2.5153	2.26472	4.40073	4.74462	4.61281	4.67286	5.11832	5.39261	4.9031	2.89642	3.06566	2.4472	4.32451	3.91415	3.81281	0.0824353	0.426659	0.565884	0.49092	0.139006	0.266211
CC2G_000489	3.58491	3.6891	3.51842	4.14595	4.53784	3.89271	5.06747	4.9518	4.93589	5.41825	5.25216	5.30651	5.16502	5.0499	5.47003	4.38052	4.33609	4.6531	5.20699	5.23733	5.10636	3.76384	3.77951	3.87398	4.41055	4.29358	4.64463
CC2G_000491	3.7313	4.14745	3.91685	4.87754	4.49785	4.23354	5.07445	4.78865	4.03382	4.77856	4.52319	4.51219	4.762	4.9185	4.7509	3.94683	4.15021	4.06168	4.92101	4.8468	4.98153	4.85165	4.47382	4.60729	3.59043	3.64739	4.02677
CC2G_000492	6.55319	6.4272	6.44377	6.21907	6.97133	6.66209	6.69315	6.72885	7.00553	6.57441	6.70174	6.75534	6.69966	6.83786	6.86077	7.49103	7.46512	7.46556	6.98887	7.07214	7.06898	6.50452	6.52835	6.56383	5.83386	5.85662	6.2105
CC2G_000493	8.67915	9.3298	9.38166	8.25267	8.30094	8.43743	7.36314	7.31603	7.3307	7.42045	7.29292	7.2649	7.42927	7.44703	7.42814	7.68541	7.63908	7.40382	7.54162	7.69875	7.5829	7.49561	7.4207	7.35737	8.42167	8.17978	8.55262
CC2G_000494	8.48771	8.38504	8.44119	6.45709	7.40887	7.29778	7.26127	7.15451	6.9225	7.15	7.19905	7.1578	6.77752	6.9383	7.51749	7.35805	7.44465	7.6197	7.20201	7.43754	7.51604	7.47763	7.60582	7.76668	7.87641	7.62664	7.87996
CC2G_000495	7.03892	7.9161	7.82541	4.95727	4.9766	4.66722	5.16226	5.04874	4.25629	4.27	3.99583	4.45987	4.47667	4.39724	4.57725	4.87531	4.77999	4.44761	5.21392	5.68783	5.30869	5.35086	5.57374	5.53152	4.22756	4.50113	4.3543
CC2G_000496	5.62888	6.28571	6.44114	5.76688	6.23472	5.93147	6.74876	6.62626	5.19558	4.91704	5.16925	5.30651	5.45539	5.59209	5.60764	5.45552	5.06222	4.93885	5.31624	5.41283	4.92454	5.43954	5.52784	5.6234	4.03588	4.41483	3.77245
CC2G_000497	3.54587	3.63411	3.88626	6.45709	6.81735	7.09692	5.32916	5.20575	5.65251	4.22694	4.95751	4.86463	5.28936	4.81293	5.638	4.00689	3.81939	4.27997	4.93786	4.77279	4.36314	5.1671	5.33018	5.12021	8.00775	7.53834	8.16201
CC2G_000498	9.46033	9.04587	9.16299	6.77573	7.19416	7.0402	5.90799	5.94777	7.04689	6.60836	7.08363	7.17163	7.07784	7.04612	7.21755	7.68771	7.61427	7.48048	7.22449	7.64069	7.50497	6.84132	6.95845	6.91464	7.68722	7.95065	7.70466
CC2G_000499	7.82773	7.17092	7.01703	6.4294	6.68113	6.80512	5.91966	5.84355	6.59155	6.14647	6.65953	6.63163	6.45691	6.02669	6.50306	6.26546	6.37516	6.35362	6.09021	6.40222	6.39996	6.10065	6.42718	6.27364	6.9997	6.68019	7.02668
CC2G_000500	5.26218	3.70697	3.72271	5.89389	5.35797	5.76644	6.68633	6.6068	6.17289	6.0815	6.22049	6.3403	6.01335	5.98525	6.17869	6.17564	6.1151	6.30671	6.16246	6.06338	6.10982	6.8182	7.02857	7.03106	5.96836	6.01618	5.73833
CC2G_000501	6.51158	7.04132	7.23455	8.00316	8.19862	8.56605	8.07181	8.1427	7.83987	8.29641	8.44699	8.34586	8.35127	8.23546	8.51491	8.11072	8.10619	7.94807	8.29976	8.44248	8.41272	7.51429	7.74808	7.62449	9.00152	8.97351	8.92099
CC2G_000502	0	0	0	0	0	0	0	0	1.00442	0.773174	0.818903	0.807551	0.803435	0.54737	0.898542	1.13865	1.31271	1.55995	1.67544	2.1508	2.03155	1.81908	1.61575	1.62353	0.685278	0	0.490867
CC2G_000503	0.279274	0	0.561119	0	0	0	0	0	1.19762	0.581417	1.13794	0.644021	0.883322	0.708806	0.898542	1.27516	1.82264	1.50442	1.92112	1.72887	1.98983	2.404	2.09394	2.32263	0.49092	0.382322	0.935008
CC2G_000505	2.14318	3.55737	3.90164	1.41702	2.87796	3.44562	6.29326	5.97459	3.26664	3.45907	3.11114	2.67281	3.23212	3.43365	3.44748	1.92063	1.89871	2.17223	3.18031	2.68764	2.97749	4.91207	4.56404	4.64162	4.0711	4.33031	4.28101
CC2G_000506	5.9031	5.4781	5.55812	4.60791	5.11523	5.11452	6.31111	6.37336	5.16701	4.97674	5.08361	4.92822	5.39023	5.17955	5.18254	5.17052	5.13282	5.12297	4.88961	4.78266	4.71965	5.03877	5.05202	4.96864	5.04092	4.64222	4.8663
CC2G_000507	6.85151	5.84792	6.04381	5.67554	5.89312	5.93147	6.3519	6.25333	6.40838	5.88433	6.19278	5.99763	6.10887	5.8662	6.54015	6.2281	5.96176	6.13792	5.86065	5.5366	5.23694	5.49515	5.61146	5.55463	5.83642	5.27151	5.53582
CC2G_000508	6.8475	6.95047	6.84276	7.07282	6.69888	7.06173	9.13738	8.93402	6.15554	6.65478	6.4295	6.41514	6.67813	6.68451	6.90096	5.91333	6.03521	6.11377	5.77106	5.87324	5.65244	5.98218	6.19052	5.95662	5.18452	5.39456	4.66206
CC2G_000509	8.35	7.09999	7.26459	6.51093	6.78448	6.58488	6.05288	6.04135	7.72401	7.05628	7.46232	7.57741	7.39006	7.01558	7.1536	8.01221	7.87125	7.81138	7.80183	8.12547	7.85684	7.45895	7.48493	7.47239	8.64954	8.57367	9.0059
CC2G_000510	7.89011	7.91706	7.72201	8.32208	7.93968	7.84078	9.23174	9.19616	7.82988	8.6628	8.43065	8.30309	8.42006	8.39475	8.12371	8.72314	8.81625	8.38714	7.82466	7.68829	7.82679	7.82943	7.85273	7.82352	6.79901	6.90869	6.57794
CC2G_000511	5.87974	6.15834	5.92089	4.79314	5.2417	5.43361	7.87594	7.62983	4.8736	5.67204	5.45783	5.38415	5.75389	5.55008	5.93964	4.09253	3.95026	4.02268	4.18096	3.87163	3.97663	5.43954	5.68728	5.42444	4.3256	4.90828	4.23517
CC2G_000512	8.81944	8.35064	8.54338	7.15966	7.55732	7.49532	6.67489	6.74674	7.49489	6.85362	7.21185	7.42619	7.19204	7.0624	7.28678	7.92443	7.66926	7.91118	7.65166	7.83067	7.68079	7.8099	7.76986	7.88181	7.34904	7.44177	7.29682
CC2G_000513	8.00432	7.40654	7.66231	5.97275	5.93864	6.39438	8.13411	8.0981	6.29939	6.73571	6.52579	6.4983	6.9422	6.69178	6.68855	7.09476	6.93836	7.07797	7.10218	6.83976	6.69188	5.82943	5.77904	5.86712	7.0156	7.01292	7.29589
CC2G_000514	8.73482	9.14056	9.2609	8.35189	9.00609	8.46193	7.83952	7.87731	8.14395	8.50027	8.32364	8.49831	8.47528	9.00217	8.56909	10.2933	10.1843	9.85167	9.2801	9.40463	9.74103	7.83092	7.83	7.92743	7.37128	7.0253	7.69482
CC2G_000515	4.74651	4.56504	4.3681	4.14595	2.87796	4.46662	4.3703	4.55476	3.44859	3.36292	3.6074	3.27653	3.79369	3.70009	3.9124	3.15715	3.25842	3.0615	3.72423	3.6233	3.31816	4.25637	4.33313	3.90515	3.4369	3.53858	3.47667
CC2G_000516	5.31345	5.45713	5.50373	6.45709	5.92363	5.73104	7.91827	7.78832	4.94265	5.98467	5.6026	5.36239	5.77498	5.85905	5.78694	4.77814	4.99883	4.86911	5.56783	5.29364	5.16378	5.71942	5.62661	5.68755	4.83609	4.85381	4.61511
CC2G_000517	3.71965	2.61945	2.90637	7.61787	7.51787	7.86139	5.24503	5.28136	8.09777	7.67589	7.88334	7.96768	7.58633	7.78061	7.74374	8.39731	8.58976	8.60699	8.07994	8.53711	8.69665	7.18352	7.38105	7.21901	6.54092	6.59822	6.40588
CC2G_000518	3.10135	2.82982	2.93655	3.46232	3.30619	3.95541	2.43077	2.72807	2.6595	2.91132	2.72712	2.71463	2.99198	3.06742	2.99477	3.24289	3.37618	3.35631	3.33245	3.07801	3.24024	2.77011	2.52614	2.86734	3.59043	3.32221	3.55338
CC2G_000519	6.53337	6.66521	6.79208	8.53195	8.895	9.25862	7.76164	7.54673	7.80227	7.75852	7.67104	7.672	7.77845	7.85797	7.87275	7.34356	7.49376	7.56179	8.2399	8.28415	8.37549	7.93546	7.90165	7.94065	8.52331	8.42493	8.42744
CC2G_000520	1.31909	1.0878	1.37	0	0	0	0	0	0.193751	0	0.218754	0	0	0	0.299184	0.149585	0.193608	0.415779	0.236223	0	0.302278	1.12173	0.981853	1.15537	0.139254	0.265787	0
CC2G_000521	1.25598	1.70089	0.964086	0	2.06196	0	0.858618	0.581482	1.19762	1.04512	1.10171	1.35783	1.16484	1.18199	0.985067	1.76702	1.72156	1.35544	1.27694	1.2862	1.48874	0.667246	0.895531	0.616978	3.35354	3.03234	2.80282
CC2G_000522	3.2545	2.72847	2.44286	4.60791	3.96417	4.33133	4.9433	4.69959	5.34591	5.2986	5.51921	5.5665	5.63632	5.7333	5.94369	5.01591	4.99017	4.89363	5.17656	5.18123	5.20082	5.24298	5.64987	5.44756	4.41741	4.40109	4.5971
CC2G_000523	7.24695	6.82514	6.76711	5.81047	6.46997	6.22659	5.811	5.82261	6.47982	5.99593	6.33318	6.42881	6.32366	6.13485	6.50581	6.64358	6.42746	6.72175	6.24261	6.21322	6.10861	5.91909	6.06514	6.17586	8.05798	7.45763	8.61696
CC2G_000524	5.05533	4.34301	4.53518	7.20935	7.67856	7.59221	7.00591	7.27808	8.33972	8.27609	8.48945	8.6629	8.44722	8.34059	8.51355	8.85544	8.93897	9.03882	8.84231	8.95591	8.98363	7.51846	7.5151	7.53434	9.34531	9.15545	9.33837
CC2G_000525	6.30886	6.71905	6.8227	7.37819	8.06814	8.17961	7.1843	7.11373	7.84258	7.66383	7.68641	7.79609	7.66684	7.89129	7.77254	8.08309	8.08752	7.94122	7.84787	7.94972	8.03022	8.3679	8.47788	8.35462	9.53165	9.51327	9.49486
CC2G_000526	6.90649	4.95731	5.53365	7.94568	7.7821	7.87766	8.49572	8.63882	7.88793	8.38811	8.40463	8.40427	8.21656	8.46213	8.49915	7.77665	8.1214	8.08658	8.03204	7.99499	8.05667	8.53571	8.55998	8.65198	7.22553	7.6318	7.18272
CC2G_000527	5.89017	6.23117	6.32046	6.31299	6.42802	6.34839	5.95792	5.8099	5.6689	5.45835	5.38056	5.20257	5.28017	5.42977	5.37908	5.21151	5.13675	5.00787	4.97913	4.88395	5.04911	6.31614	6.31005	6.30319	5.69965	5.38411	5.48123
CC2G_000528	8.91254	8.94546	9.05624	7.8019	8.1446	8.03834	6.89789	6.79053	7.32941	6.14936	6.42493	6.58447	6.81301	6.92946	7.11395	8.49861	8.26348	8.12189	7.31485	7.52049	7.25329	5.28057	5.31986	5.32807	7.95511	7.47823	8.23999
CC2G_000529	2.27635	3.12395	3.05131	2.94136	2.87796	3.61053	3.26619	3.70915	5.17277	4.73313	4.84422	4.94296	5.33802	5.03475	5.20975	6.44714	6.5401	6.10795	6.40386	6.50616	6.62701	6.53228	6.44723	6.51331	5.10179	5.16165	4.92522
CC2G_000530	5.59102	4.01023	4.06079	4.14595	4.32576	3.89271	4.92024	4.81433	5.39109	5.52873	5.51577	5.68344	5.71757	5.56246	5.82409	6.51334	6.34914	6.30873	6.4447	6.76206	6.29145	5.7402	5.68728	5.81062	7.47928	7.39832	7.5123
CC2G_000531	4.59538	3.6153	3.87071	4.39534	4.82322	4.12863	4.47952	4.32396	3.62702	4.91365	4.74494	4.62979	4.95691	4.93219	5.01786	3.22615	3.55723	3.64658	3.81213	3.65946	3.73917	5.11419	4.97519	4.89809	6.24578	5.85662	5.89392
CC2G_000532	10.5583	9.6189	9.72554	8.49234	8.21413	8.70252	8.91965	8.86914	7.31125	6.34198	6.48418	6.22566	6.54322	6.78602	6.41229	6.27973	6.25912	6.23707	6.1838	6.14981	5.86064	7.39335	7.41732	7.47022	8.99007	8.78558	9.05234
CC2G_000533	8.04863	8.39335	8.46597	7.87558	8.17027	8.08114	7.64455	7.73778	7.3537	6.89632	7.21238	7.5741	7.21538	7.67056	7.31681	8.54028	8.39096	8.04431	8.0166	8.44895	8.60441	7.55681	7.69796	7.66489	7.6484	7.93821	7.87685
CC2G_000534	5.85865	5.54918	5.7056	6.4294	5.84611	5.59983	6.03152	6.03773	5.69716	5.62307	5.69517	5.8428	5.90388	6.06572	5.97838	6.45704	6.34744	6.25926	5.78199	5.87785	5.93947	5.66862	5.63163	5.60454	5.71643	5.26013	6.06743
CC2G_000535	2.17764	1.38287	0.964086	0	2.44513	1.21373	3.80867	3.8147	2.00663	2.06716	2.00061	2.28577	2.22545	2.21216	2.31476	3.17471	3.02381	2.89873	2.72981	2.74262	2.90077	1.81908	1.95146	1.72016	1.73583	1.73394	2.15217
CC2G_000536	8.73807	8.492	8.42198	8.40972	8.68175	8.9839	3.26619	3.72729	7.92765	6.64969	6.59258	7.05438	6.80854	7.38167	7.00104	9.06226	9.01757	8.77884	8.06788	8.47607	8.61388	5.85897	5.80147	5.90615	8.27882	7.98562	8.69027
CC2G_000537	2.24419	1.46918	1.75577	3.46232	3.1079	3.15643	5.83997	5.0196	3.10734	3.99001	4.03478	3.97197	3.89834	3.70648	3.72397	2.84251	3.09828	3.14558	3.68486	3.42749	3.55116	3.92889	3.95515	3.7189	2.71665	2.82146	2.52661
CC2G_000538	5.69282	6.86748	6.77965	6.61294	6.0396	5.73104	7.57856	7.31002	5.12603	5.14229	4.95751	4.91632	5.20249	5.28575	5.22538	4.58808	4.75719	4.52988	5.26153	4.98145	4.71325	4.73225	4.86309	4.70498	5.21239	5.24097	5.59448
CC2G_000539	8.18405	8.33348	8.45298	5.36065	5.99719	5.59983	3.36059	3.18708	5.66482	4.67425	4.8025	4.96044	4.92424	4.91022	4.91967	5.77194	5.61521	5.74437	5.51268	5.68958	5.75252	6.25746	6.30064	6.36801	9.76882	9.59101	9.89345
CC2G_000540	3.59769	2.86209	2.60195	2.94136	2.44513	2.9254	1.91274	2.53565	2.90073	2.04254	2.33303	1.75521	1.91925	2.06083	1.53665	2.34962	2.02286	2.70295	1.16693	1.55548	1.26215	2.19756	2.24121	2.15988	2.08499	1.64342	1.90138
CC2G_000581	6.72615	7.22154	7.24664	5.30077	5.03366	4.66722	3.99682	3.28828	4.9291	4.10741	4.27333	4.52007	4.02702	3.82864	4.2504	5.28207	5.26083	5.26967	4.57118	4.97285	4.72284	4.27402	4.01267	4.34472	3.38186	2.97782	3.1211
CC2G_000582	6.03112	5.86394	5.87098	2.94136	4.07705	4.55023	6.62346	6.32951	3.99533	3.40216	3.3305	3.65863	3.79369	3.81688	3.81536	4.16021	3.84365	4.30862	4.11337	4.2301	3.88287	4.21129	4.3249	4.31408	5.96134	5.58291	6.29297
CC2G_000583	4.64548	5.19116	5.2084	5.03282	4.82322	4.7042	7.56499	7.52746	4.84502	5.76902	5.48622	5.26957	5.76315	5.9056	5.9274	4.45067	4.12272	4.03253	4.09346	4.06197	4.05459	5.74337	5.82209	5.68456	6.58118	6.52247	6.94004
CC2G_000584	5.98078	5.51914	5.28662	4.87754	4.91719	5.08679	4.3816	4.44944	4.17826	2.64312	2.31732	2.6586	2.3849	2.96457	2.38009	4.69234	4.52493	4.11827	3.9178	4.47297	4.44261	5.8428	5.63995	5.69203	7.48337	7.20714	7.61505
CC2G_000554	4.21054	3.65267	3.72271	6.15288	6.25885	5.24573	6.11175	6.08421	6.19287	6.61045	6.20136	6.41936	6.31017	6.80698	6.43745	6.78178	6.83386	6.66985	7.15776	7.3017	7.43965	6.50077	6.3532	6.4345	7.607	7.69373	7.84478
CC2G_000555	5.51557	5.36445	5.49868	4.79314	5.03366	5.08679	4.67591	4.58492	4.66873	3.99001	4.20667	4.22925	4.39044	4.39724	4.43464	5.20938	5.1907	5.24447	4.56035	4.77938	4.56486	4.49328	4.62231	4.62612	4.66223	4.75999	4.79437
CC2G_000556	4.88851	5.37567	5.66111	3.66589	4.9472	4.62927	4.92797	4.74481	4.21222	4.10741	3.89359	4.17036	4.30237	4.19402	4.3798	4.75789	4.7392	4.6467	4.46672	4.4525	4.57195	4.41987	4.48864	4.43647	4.55437	4.68822	4.60313
CC2G_000557	9.77611	10.3734	10.3125	7.48966	7.33702	7.35122	9.26378	9.19127	6.50971	6.72705	6.47003	6.53475	6.89299	7.14174	6.77685	7.70292	7.7999	7.68165	7.22906	7.25046	7.29992	6.81368	6.81444	7.00012	7.15855	7.41295	7.13464
CC2G_000558	7.88751	8.75994	8.93723	5.41814	5.76418	5.58007	5.02485	5.13958	6.70322	4.57903	4.76535	4.81101	4.53039	4.74318	5.00756	6.51506	6.63697	6.8685	6.41092	6.7173	6.84744	6.51569	6.48374	6.47488	8.07868	7.63254	7.93714
CC2G_000559	0.617261	0.71646	0.212222	4.50553	2.7476	4.37785	5.12912	5.20575	4.05892	4.80075	4.97264	4.8078	5.08914	4.78302	4.91692	3.09395	3.06566	2.77512	3.89497	3.82144	3.95511	3.79473	4.06799	3.85282	3.42333	3.72668	3.55338
CC2G_000560	4.81379	4.26069	4.45406	2.94136	3.30619	3.44562	5.47874	5.50809	3.48608	3.302	3.39928	3.4098	3.75705	3.52322	3.42444	3.62146	3.58051	3.41019	3.32393	3.18111	3.33492	4.68686	4.70712	4.78256	4.09696	4.40109	4.0446
CC2G_000561	7.284	6.53118	6.7608	6.84025	7.24337	7.35704	7.05439	7.03401	7.28356	7.11058	7.39608	7.29335	7.24498	7.21021	7.31054	7.58515	7.45807	7.49034	7.26844	7.18993	7.15938	7.27838	7.2349	7.3169	7.77394	7.85431	7.9783
CC2G_000562	7.09747	8.48877	8.34462	6.73106	6.99307	7.15149	7.25668	6.79913	5.87021	5.82963	5.48973	5.4963	5.48769	5.7411	5.36705	6.43261	6.6494	6.48495	5.9547	5.78923	5.83877	4.77005	4.44752	4.66001	3.59043	3.99726	3.6497
CC2G_000563	5.62576	6.10879	6.37932	6.61294	6.54056	5.65753	3.96711	4.01992	5.67297	5.80605	5.91727	5.83176	5.40722	5.43939	6.71094	4.59135	4.62908	4.95188	4.51616	4.44424	4.46562	6.1718	6.32973	6.33692	8.47071	8.37921	8.54638
CC2G_000564	1.95731	2.18183	2.21563	1.41702	2.60428	1.86343	0.573356	0.732788	1.72235	1.54318	1.69493	1.85831	1.73774	1.62124	2.57401	1.13865	1.07114	1.32371	0.872021	0.807935	0.764914	1.86638	2.15094	2.17701	3.99062	3.71562	4.18783
CC2G_000565	1.12082	0	0	0	0	0	0	0.581482	0.364536	0.773174	0.678375	0.523701	0.629023	0.708806	0.488808	0.0767305	0.0674644	0.0781586	0.161699	0	0	4.53778	4.8198	4.55257	5.76025	5.63669	5.5639
CC2G_000566	1.37955	1.90048	2.05985	4.70349	4.27933	3.44562	4.73878	4.71785	3.54056	2.57608	2.23609	2.83328	2.3849	2.60303	2.03951	2.09677	1.70046	1.53245	1.72804	1.55548	1.73591	0.866515	0.705653	0.890529	2.21663	1.77716	2.15217
CC2G_000567	1.64885	0.851145	1.07676	0	3.1079	2.65018	6.57751	6.07361	1.84286	1.93964	2.02015	2.30414	2.08046	1.75051	2.3478	0.906124	0.740045	1.00148	1.34588	0.954852	0.302278	1.66709	1.41318	1.46523	0.935096	1.14649	1.27412
CC2G_000568	4.55662	5.00865	4.94451	0	2.26623	2.1038	4.16323	4.3476	4.03382	4.15412	4.34094	4.17036	4.26557	4.17111	4.42693	3.79614	3.90487	4.46953	4.62765	4.51699	4.37128	4.5487	4.43227	4.39682	4.08839	3.73767	3.85558
CC2G_000569	7.10867	6.19363	6.4226	6.79756	7.32564	6.83877	6.00253	6.10516	6.78823	6.2576	6.38592	6.32125	6.2708	6.46284	6.48276	7.46584	7.27264	6.9539	6.41293	6.91348	6.72245	6.36841	6.54971	6.46445	8.01455	8.19031	8.34487
CC2G_000570	5.71646	4.98687	5.29829	5.67554	5.62258	4.87609	5.72488	5.7312	5.66482	5.60005	5.68907	5.54154	5.76974	5.84753	5.85457	5.6934	5.7093	5.74137	5.8294	5.66311	5.58223	6.12759	5.97593	6.14029	5.71365	5.74677	5.67965
CC2G_000571	4.9645	4.31996	4.41172	7.36364	7.28509	6.82204	4.16323	4.33583	6.00546	5.6498	6.0994	5.77524	5.28385	5.23583	5.7317	5.66106	5.83198	5.97382	5.14306	5.15106	5.14489	4.95646	4.96463	5.09115	4.43102	4.39416	4.36143
CC2G_000572	6.56137	6.52616	6.75658	6.04752	6.14694	5.51911	6.60188	6.68776	5.94616	6.12904	6.14239	6.0625	6.01556	6.28432	6.07648	6.62773	6.63001	6.54209	6.36909	6.3423	6.56355	6.55321	6.64786	6.74701	6.43845	6.53825	6.25328
CC2G_000573	1.78919	1.90048	1.94579	4.27603	3.77633	4.23354	3.72241	3.67218	4.10785	5.59583	5.59284	5.44339	5.6478	5.71915	5.22538	5.66106	5.55478	5.11604	5.85771	6.06473	5.44809	4.98621	4.84305	5.02884	4.04477	4.57646	3.79368
CC2G_000574	1.69717	1.46918	0.841857	0	2.60428	0	2.1427	2.10743	5.37618	5.80056	5.75471	5.27657	3.61802	3.49398	3.99291	2.86432	2.85271	3.07109	3.76885	3.43586	3.62797	3.54145	3.77347	3.44264	2.73872	2.44637	2.82362
CC2G_000575	1.8757	1.38287	1.27872	3.46232	3.1079	3.04553	4.56131	4.69038	4.25629	4.24863	4.15014	4.2719	4.67489	4.60298	4.7509	3.37789	3.26562	3.54014	3.92907	3.87778	3.40008	4.10684	4.2486	4.19303	3.18695	3.36533	3.1042
CC2G_000576	7.03657	6.06788	6.04034	4.60791	5.52646	5.22043	5.27565	5.34734	5.28871	4.93387	5.05073	4.85219	5.20249	5.05742	5.22316	5.56445	5.44333	5.43288	5.58753	5.35887	5.45001	5.27182	5.27782	5.67103	6.65121	6.55697	7.03562
CC2G_000577	5.66273	5.50899	5.23292	4.60791	5.79751	5.2706	5.81518	5.76671	5.17277	5.5529	5.55315	5.62067	5.62038	5.60069	5.53421	5.45552	5.35158	5.32882	5.76005	5.87324	5.88218	5.60903	5.63995	5.55135	7.62563	7.69443	7.5306
CC2G_000578	6.9395	7.28241	7.30129	5.36065	5.52646	6.00741	7.21622	7.19091	5.26194	5.67404	5.61871	5.38846	5.60279	5.57474	5.9123	4.37293	4.26602	4.62733	5.05315	4.80866	4.593	6.21356	6.43676	6.21681	5.9233	5.9727	5.71068
CC2G_000579	5.59422	5.45713	5.54838	5.23831	5.14143	5.02966	4.98094	4.66237	4.99561	3.81936	4.1051	3.90732	4.17721	3.81097	4.03408	5.13058	4.81722	4.95188	4.09846	4.35443	4.1851	4.45897	4.52144	4.52273	4.87646	5.1203	4.58497
CC2G_000580	3.22184	2.86209	3.34927	3.22523	3.56033	3.61053	3.77479	3.04969	2.69196	1.85734	1.69493	1.67274	1.82124	1.82285	1.9128	1.06523	1.28463	1.47583	0.962607	1.21022	0.714572	1.99964	1.90802	1.89595	1.0096	1.49602	1.00951
CC2G_000586	8.57352	7.7654	7.96828	7.0181	7.31417	7.30983	6.97453	7.03219	7.14246	6.74241	6.90529	6.97558	7.06022	6.95315	7.26803	6.90263	6.97231	6.71718	6.63663	6.66223	6.63465	6.70972	6.74748	6.71512	8.24066	7.85368	8.49868
CC2G_000587	4.01475	3.79316	3.77375	4.00298	2.99751	3.61053	5.89622	6.03409	4.29905	4.81898	4.78262	4.85531	4.77515	4.9019	5.26699	3.77902	3.98992	4.4141	4.41151	4.16115	4.49575	6.08823	6.10656	6.08352	3.69572	4.78137	3.92459
CC2G_000627	3.89559	7.01107	6.81663	4.95727	6.36271	5.83474	2.59514	2.57625	4.76339	4.57045	4.31349	5.98344	4.74873	6.01772	5.85026	8.6686	8.54109	7.87468	6.78907	7.48315	6.84963	2.61257	2.32616	2.56308	3.29516	2.84195	3.90521
CC2G_000628	4.81926	5.71292	5.49868	4.70349	4.32576	4.46662	1.78237	1.93087	3.80075	3.10208	3.1995	3.15015	3.9316	3.69368	3.47016	4.48275	4.23701	4.04718	3.88343	3.76944	3.7009	4.11175	3.7367	3.78183	3.81478	3.70447	3.68423
CC2G_000629	1.59886	0.974322	1.37	2.11792	3.1079	2.9254	0.573356	0	1.59085	1.23091	1.36888	2.00034	1.62607	1.89174	1.21728	1.54195	0.968989	0.785514	0.824501	0.807935	1.57592	7.88468	7.76568	7.67509	7.19393	7.162	6.96717
CC2G_000588	6.40835	6.27676	6.44114	5.10462	5.31258	4.97018	6.11514	6.00092	5.12008	4.80807	5.0388	5.05573	5.3713	5.03982	5.23203	6.31579	6.17464	6.00542	5.49001	5.49318	5.44036	5.52124	5.26497	5.4651	5.84153	5.89145	5.89638
CC2G_000589	4.07084	3.39045	3.45729	7.51623	7.65602	7.30983	8.27031	8.35662	6.73666	7.19886	6.70401	6.62525	6.57514	7.08525	6.82676	6.13809	6.63697	6.10212	6.33134	6.20223	6.6681	7.62802	7.68435	7.63692	7.857	7.74428	7.67636
CC2G_000590	2.48338	2.12978	2.48431	2.94136	1.5387	1.86343	1.78237	0.869721	1.44615	2.09137	2.02015	2.32229	2.35719	2.39729	2.17451	1.81261	1.72156	1.7629	2.4767	2.49297	2.36102	4.01012	4.02797	3.97045	3.93435	3.84311	3.99961
CC2G_000591	4.29144	5.40334	5.15806	4.87754	4.57676	4.7042	4.99573	4.94407	8.26349	7.60935	7.31435	7.05709	7.37718	7.41081	7.60334	8.6909	8.49436	8.33138	8.54532	8.80124	8.71917	7.03747	6.94978	6.79633	9.90725	9.65467	10.2204
CC2G_000592	3.8321	4.64138	4.35699	4.79314	2.99751	3.35552	0.982555	1.72965	6.18149	2.48766	2.50933	2.49223	3.03634	3.20912	2.78166	5.34934	4.95497	6.39906	5.58753	6.02092	6.43924	4.85751	5.08165	5.00745	10.9851	11.0641	10.9367
CC2G_000593	5.86923	5.83172	5.68352	6.18635	5.54621	6.05112	5.75126	5.48695	4.85222	3.59225	3.61385	3.56266	4.01377	4.27362	4.19248	3.30002	3.53952	3.69079	3.72423	3.45244	3.48513	4.45511	4.67184	4.43647	4.17996	3.82262	4.18783
CC2G_000594	5.19647	4.49476	4.31165	4.14595	3.8417	5.24573	4.3703	4.14663	4.07131	2.81285	2.67875	2.24829	3.06232	3.02715	2.80563	2.27016	2.38208	2.54678	2.63658	1.97829	2.73388	3.36331	3.93366	3.32465	2.76046	2.80066	2.84412
CC2G_000595	5.99534	4.85683	4.6213	6.37237	6.55037	6.51375	5.82349	5.86008	6.78071	6.55278	6.73539	6.68169	6.6427	6.79429	6.84928	6.65301	6.70209	6.79807	6.81742	6.82072	6.62275	7.16236	7.25346	7.18661	7.28954	7.24419	7.20865
CC2G_000596	7.02124	7.70108	7.41952	3.66589	4.61465	4.50903	6.38878	6.24391	4.62738	4.60027	4.27333	4.39275	4.67769	4.53282	4.69102	4.82337	4.74178	4.76957	4.75984	4.60492	4.5216	4.32993	4.3249	4.24674	4.01795	3.95083	3.85558
CC2G_000597	5.37414	5.10616	5.06551	4.39534	3.90423	3.95541	4.92797	4.87253	4.22337	4.11333	4.19812	3.91929	3.9549	3.98921	3.99291	3.97216	3.9413	4.1548	4.68864	4.57873	4.55058	4.95919	4.95932	5.13124	4.74088	5.27151	5.18836
CC2G_000598	7.92095	8.2919	8.23203	7.39261	7.30261	7.22331	7.52733	7.71637	7.35497	7.11206	7.26554	7.22566	7.17031	7.36107	7.17447	7.98789	7.97701	7.81851	7.61153	7.62157	7.70154	6.72102	6.78848	6.85803	7.13898	7.03757	6.91604
CC2G_000599	3.93641	5.09941	5.03096	4.39534	4.45671	3.75851	4.42594	4.28775	4.09577	4.38216	4.38683	4.30877	4.70818	4.60981	4.78144	4.25819	4.25882	4.2252	4.53104	4.62701	4.77903	5.36739	5.43335	5.41545	6.28942	6.53982	6.20852
CC2G_000600	5.46763	5.73486	5.5287	6.51093	6.55037	6.17484	8.24268	8.00266	5.32537	5.82963	5.48622	5.32237	5.65066	5.77796	5.58357	4.71952	4.89123	4.79583	5.4017	5.21321	5.06427	5.30653	5.38269	5.38629	4.42423	4.85885	4.02677
CC2G_000601	3.69607	3.65267	3.6698	0	2.60428	2.49	4.74755	4.43848	1.89954	2.50578	2.31732	2.39269	2.41209	2.36535	2.38009	1.9413	1.84204	1.85459	2.09139	2.1508	2.01084	4.13125	4.1165	4.23452	4.82065	5.17383	4.43085
CC2G_000602	6.56137	6.55605	6.25611	5.89389	5.81389	5.96233	6.41926	6.34428	6.29412	6.34072	6.69872	6.62342	6.70379	6.44289	6.59363	6.33642	6.33209	6.40475	6.21293	6.32327	6.14945	7.09321	7.12775	7.18291	7.10752	7.56787	6.90144
CC2G_000603	8.58078	8.64643	8.70331	7.0181	7.37063	7.01098	5.71151	5.48162	6.49829	6.12758	6.04797	6.30993	6.14781	6.22771	6.11776	7.65797	7.51128	7.26973	6.74429	7.14409	7.12245	6.69178	6.67888	6.71219	6.44853	6.52722	6.41105
CC2G_000604	9.04503	9.18747	9.20389	7.435	7.60987	7.60693	5.88037	5.77545	6.68117	2.82734	2.03943	5.28816	2.08046	2.19409	1.77387	5.782	6.15926	5.87601	4.21361	3.60857	4.39145	4.62288	4.55702	4.41498	9.76361	9.49761	10.2857
CC2G_000605	2.39826	1.62771	1.68643	1.41702	0	0	0	0	0.193751	0	0	0	0.0699543	0.157503	0.0808106	0.149585	0.364282	0	0.161699	0.585414	0.432569	0.371859	0.600438	0.565884	0.38295	0.590463	0.139237
CC2G_000606	6.62675	6.29164	6.49283	5.57802	5.31258	4.55023	7.09786	7.28575	6.14093	6.00233	6.31054	6.45166	6.31468	6.33468	6.60563	5.81597	5.91445	6.31682	5.95883	5.77941	5.91181	6.8099	6.82104	6.99591	6.13573	6.22177	6.29855
CC2G_000608	6.7071	4.8885	4.88386	5.23831	5.16715	5.76644	5.35233	5.52892	6.09919	6.19335	6.09595	6.11679	6.03428	6.35006	6.3196	6.65223	6.69678	6.96808	6.91635	6.86862	7.00432	6.85896	6.8586	6.95925	5.19254	5.59805	5.1641
CC2G_000609	7.81273	9.05984	8.91419	0	1.5387	1.86343	0	1.10985	0.781292	0.712044	0.466791	0.392426	0	0.489277	0	0.863446	1.10364	0.918933	0.724492	0.459801	0.714572	0	0.486941	0.760228	0	0	0
CC2G_000610	5.94871	8.11745	8.17067	4.60791	5.64106	3.82717	2.38658	3.28828	3.00773	2.04254	1.10171	2.37541	1.16484	1.79914	0.985067	5.76181	6.07366	5.94412	5.44751	4.92909	4.85942	3.6468	3.35527	3.61591	3.05244	2.04807	3.95318
CC2G_000611	3.77697	4.49476	4.53518	5.30077	4.9766	4.87609	5.64741	5.05594	4.60199	4.80075	4.97264	5.06114	5.01127	4.85379	5.00238	5.28409	5.10097	5.2759	5.26821	5.24925	5.24139	5.85017	5.89482	5.86712	5.87928	6.11634	5.67107
CC2G_000612	5.60058	5.74355	5.39383	5.52667	5.2417	4.55023	6.48623	6.38769	4.63574	5.4951	5.27471	5.36458	5.25035	5.47537	5.43587	5.53415	5.3784	5.24235	5.45923	5.37853	5.5503	6.12516	6.0577	5.86051	6.30059	6.31818	6.07395
CC2G_000613	6.18516	6.41094	6.2769	4.87754	4.65157	4.23354	7.09615	7.04851	4.85938	5.39169	5.3577	5.02281	5.4845	5.79004	5.41459	4.88335	4.99883	4.95965	5.29679	5.00694	5.12816	4.84871	4.80804	4.66912	4.29614	4.45531	4.24291
CC2G_000614	7.11647	6.26776	6.3848	6.15288	5.5849	6.10742	7.61133	7.66437	6.26205	6.30624	6.16342	5.86927	6.10991	6.24207	6.03525	5.28207	5.56503	5.4894	6.15047	5.92317	5.92985	7.46424	7.75001	7.36999	8.73745	8.75212	8.63177
CC2G_000615	5.02253	3.25122	3.63342	8.89799	9.06031	9.48534	9.21998	9.38008	8.58677	8.35006	8.4436	8.6101	8.25882	8.27387	8.46192	8.68803	8.68547	8.89626	8.35568	8.52172	8.63328	7.89077	7.98075	7.9048	7.18492	7.13941	6.89162
CC2G_000616	5.71938	7.04308	6.87038	5.41814	5.06137	5.02966	4.92024	4.80582	4.42023	4.79707	4.49554	4.71468	4.81644	5.05241	4.57725	4.65842	4.91661	4.32474	5.73457	5.5111	5.36281	5.03101	4.93518	4.97109	5.39372	5.56761	5.54211
CC2G_000617	4.79171	5.06518	5.263	5.47342	5.76418	6.33667	5.34657	5.35319	5.61068	5.13939	4.90855	4.91333	5.171	5.0822	5.26267	4.8178	5.18691	5.3348	4.95451	4.76949	4.91343	4.90075	4.86877	4.69907	3.2187	3.81227	3.54088
CC2G_000618	7.07821	6.68113	6.6445	7.91605	7.69192	8.12611	9.3181	9.11841	7.1844	7.31326	7.06963	6.94882	7.17875	7.21469	7.02166	6.7875	7.14523	6.94936	7.09843	6.94386	7.13267	7.80687	7.64933	7.62878	6.65847	6.92199	6.44164
CC2G_000619	7.84391	8.2919	8.30758	5.67554	6.21018	5.94698	4.54129	4.4925	5.87375	4.81898	5.22505	5.246	6.32187	5.90143	5.73013	6.25311	6.10109	5.99286	6.89279	7.06136	6.68781	2.73231	3.06025	3.00797	2.73872	2.71436	3.23416
CC2G_000620	8.36924	8.99949	9.24025	5.97275	6.56012	6.5033	5.62856	5.79708	6.29147	5.83501	5.92636	5.73177	7.07305	6.64099	6.66826	6.8854	6.75804	6.65717	7.41801	7.60868	7.35025	3.65356	3.79747	3.84748	3.47684	3.27777	3.95318
CC2G_000621	7.46144	6.70355	6.88592	4.50553	5.35797	5.71301	4.9433	5.26903	5.22914	4.87234	4.89008	4.61882	4.86644	4.77392	5.10497	4.82337	4.62908	5.03262	5.01397	4.86239	5.04402	4.86044	5.07675	4.93631	4.31095	4.60072	4.69064
CC2G_000622	6.80404	5.55412	5.6245	5.67554	5.93864	6.22659	7.71437	7.64064	5.7975	5.41105	5.57973	5.37982	5.53947	5.4735	5.87737	5.29618	5.61239	6.03879	5.34389	4.92909	5.00267	5.19052	5.49152	5.45284	4.16374	4.30839	3.99961
CC2G_000623	4.90917	5.49363	5.24503	4.95727	4.88654	4.66722	5.58523	5.46009	4.21222	4.83699	4.31744	4.24361	4.59113	4.80104	4.40356	4.19505	4.43838	4.11364	4.40748	4.34114	4.17583	4.39992	4.01267	4.42218	3.10436	2.97782	2.78172
CC2G_000624	9.71729	10.3874	10.6748	8.07641	8.29803	8.26871	6.5173	6.57711	8.22103	7.77822	7.976	8.24214	7.86954	7.62449	7.80709	9.04476	9.00054	8.99715	8.28749	8.34675	8.43815	8.29441	8.31881	8.3936	8.93258	9.17199	9.08204
CC2G_000625	7.23575	6.6991	6.70929	7.27306	7.61922	7.41952	5.89622	5.98217	7.22932	6.101	6.66962	7.27832	7.06451	7.26263	7.07749	8.66336	8.32335	7.85053	7.44477	7.92616	7.76204	6.14688	6.24062	6.22404	7.56361	7.6103	7.57037
CC2G_000626	0.513155	1.55062	0.964086	1.41702	0	0.730907	1.20244	0.732788	0.193751	0.437774	0.0766631	0.0874897	0.200442	0.230242	0.230002	0.348376	0.364282	0.222816	0.560142	0.39264	0.232436	0.497359	0.426659	0.214247	0.139254	0.139006	0.139237
CC2G_000630	7.08163	6.2587	6.4119	5.81047	6.46997	6.3009	6.45714	6.44361	6.34347	6.07696	6.29759	6.05979	6.19651	6.08791	6.39165	5.30617	5.42576	5.98781	5.77263	5.73095	5.45001	7.31879	7.28245	7.38481	7.34724	7.21698	7.23315
CC2G_000631	3.00868	0.974322	1.61359	0	1.82392	0	0	0	0	0.278232	0.218754	0.322019	0.629023	0.157503	0.3652	0.218937	0.131914	0.415779	0.307087	0.585414	0.432569	4.1882	4.14484	4.34093	6.93903	6.93755	6.77767
CC2G_000632	6.03348	6.4879	6.50042	7.09061	6.17257	6.13477	7.799	7.57455	6.36124	7.06852	6.98514	6.89754	7.02433	7.12633	6.91343	6.25827	6.36514	6.32886	6.72339	6.68521	6.62786	6.97478	6.80189	6.7427	6.17672	5.92306	5.70789
CC2G_000633	6.61737	4.86481	4.74582	6.34299	5.99719	5.93147	6.86001	6.77099	7.1098	8.31869	8.03212	8.39438	8.10825	8.30525	7.99605	8.41242	8.6965	8.26479	8.71617	8.66713	8.72494	6.39789	6.16768	6.12603	6.10632	5.77369	5.74106
CC2G_000634	8.36784	8.49586	8.66777	5.85279	6.41733	5.81796	7.36314	7.53133	6.89837	6.61359	6.8781	6.96118	6.71134	6.71335	7.15127	7.30521	7.24786	7.37557	6.68482	6.65508	6.61334	5.8487	5.89482	6.01493	5.7467	5.91824	5.64793
CC2G_000635	9.89948	10.1136	10.2148	8.55135	8.41271	8.49923	10.2569	10.3288	7.58297	8.75707	8.25571	8.13392	8.01435	8.41244	8.10753	7.48972	7.95268	7.78176	7.64098	7.70049	7.9868	7.66903	7.58873	7.67509	6.96267	7.16709	6.71643
CC2G_000636	5.78512	4.46356	4.59316	5.85279	5.60387	4.87609	5.98781	5.96698	5.41558	5.67404	5.58957	5.35138	5.46515	5.65949	5.54493	5.04485	5.04976	5.29853	5.31624	5.26106	5.07927	5.62115	5.58067	5.70094	5.50091	5.6686	5.06714
CC2G_000637	5.14079	4.61323	4.6849	5.81047	5.65931	5.71301	5.32331	5.35319	5.37618	5.29078	5.12707	5.10897	5.31119	5.11618	5.10979	5.03045	5.06429	5.10441	5.21161	4.88395	5.08918	5.4415	5.33429	5.39364	5.63051	5.76567	5.35834
CC2G_000638	5.31731	4.57481	5.00983	10.7606	10.7215	11.1331	1.47988	0.869721	9.39067	5.63958	6.03242	4.99196	6.50821	7.12693	3.04599	0	0.516883	0.222816	0.775363	0.523974	0.714572	2.19756	1.90802	2.27571	1.39032	1.14649	1.08035
CC2G_000639	2.48338	2.65671	2.60195	4.00298	4.37075	5.36599	2.24525	3.26364	4.71683	5.24835	5.04359	4.77523	4.82405	4.80996	4.37179	4.21216	4.46051	4.90708	5.62961	5.70696	5.64574	6.82719	6.38226	6.75202	7.85889	7.90328	7.57804
CC2G_000640	4.76929	5.06518	5.02395	6.86113	7.35392	7.56734	5.73813	5.7798	7.01999	6.28541	6.31846	6.3403	6.06351	5.81686	6.06411	6.43079	6.39335	7.15832	6.93325	7.3578	7.16173	8.36764	7.9938	8.19432	10.2769	10.6182	10.3065
CC2G_000641	5.04137	4.49476	4.52528	4.39534	3.90423	4.07317	3.21656	3.44992	4.18967	2.86994	3.3538	2.98908	3.37023	2.84227	2.70725	3.16596	3.06566	4.16379	4.3994	4.78594	4.51057	5.13848	4.86309	5.0934	8.12707	8.28925	8.05451
CC2G_000642	7.38424	8.21045	8.29089	5.6276	5.38014	5.2706	6.28125	6.2376	5.20686	5.65793	5.44162	5.39491	5.36262	5.33606	5.38108	5.89491	5.75988	5.63064	5.22997	5.22773	5.33808	5.75441	5.96405	5.78153	8.01568	6.30717	7.19275
CC2G_000643	7.95301	8.78434	9.07077	6.4294	6.41733	6.14825	5.31744	5.45466	6.17289	5.91517	6.13345	6.30423	6.13256	5.94665	6.27736	7.30172	7.23278	7.15043	6.47291	6.83818	6.72722	6.52769	6.51031	6.62439	7.63669	7.32831	7.44091
CC2G_000644	2.86804	2.54191	2.77893	4.14595	2.99751	3.82717	4.08242	3.95983	5.50506	4.95051	4.99503	5.1323	5.09963	5.01172	5.20525	5.21787	5.34819	5.46959	4.84565	4.94675	5.13536	5.29793	5.31363	5.3659	5.27414	4.64805	5.14357
CC2G_000645	7.8419	7.04835	7.15336	5.97275	6.41733	6.53443	7.23347	7.41865	6.45167	6.09951	6.16999	6.09321	6.1346	5.9249	6.15906	6.71883	6.74006	6.92841	6.1052	5.83738	5.97063	5.46857	5.5098	5.55135	4.64481	4.79195	4.71867
CC2G_000646	3.39293	3.79316	3.55778	5.03282	5.00541	4.33133	5.82763	5.79278	5.53667	5.33199	5.2645	5.29965	5.64351	5.75965	5.48866	5.95839	5.80134	5.49831	5.61572	5.58253	5.64069	7.06117	7.01072	7.12947	6.27061	6.48712	5.97052
CC2G_000647	6.29323	6.32675	6.72882	5.52667	5.35797	5.24573	6.26303	6.21849	5.42527	5.54196	5.57313	5.6887	5.69975	5.88322	5.75189	6.17018	5.86908	5.84979	5.99684	6.06203	6.02973	5.92329	6.11851	6.03972	5.42468	5.65418	5.19635
CC2G_000648	0.971684	1.90048	0.708306	3.22523	1.82392	1.86343	3.05653	2.53565	1.36797	1.50765	1.89871	1.67274	2.04616	1.77503	1.59284	1.48678	1.47057	1.53245	1.85171	2.28648	1.85689	3.38783	3.33081	3.33231	3.36777	3.44788	3.15432
CC2G_000649	6.74494	5.89155	6.00161	3.66589	4.75699	3.89271	4.86494	4.78865	4.63574	4.9604	5.01221	4.77523	4.95691	5.0143	4.86653	4.74325	4.53091	4.84695	5.33544	5.14342	5.152	5.58802	5.64326	5.65431	5.01854	5.09491	4.71867
CC2G_000650	4.49646	4.68712	4.74582	4.70349	5.21727	4.28326	5.21376	5.41044	5.06539	5.95529	5.60583	5.77194	5.48289	5.53581	5.63466	4.54146	4.83184	4.68467	5.01397	4.96998	5.22799	7.19109	7.05806	6.9947	6.49789	7.1217	6.24752
CC2G_000651	4.30709	4.33153	4.26485	2.94136	2.87796	4.18203	5.78144	5.3821	4.03382	4.40165	4.34482	4.38845	4.61765	4.51837	4.43079	4.08326	3.76962	4.28821	4.68531	4.34114	4.50688	4.02583	4.23548	4.06088	4.7998	4.85885	4.82564
CC2G_000652	0.617261	0.402256	0	1.41702	2.06196	2.30978	4.30056	3.8147	2.28712	2.73816	3.08354	2.83328	2.63616	2.48908	2.44258	1.89966	2.31426	2.09913	1.44347	1.21022	1.42755	2.59863	2.70174	2.74635	0.935096	0.855326	0.266211
CC2G_000653	6.12683	5.96394	5.89423	5.10462	4.13034	5.02966	5.58033	5.50809	5.05295	4.90001	5.16047	5.24124	5.19663	5.20006	5.1478	5.71606	5.4177	5.40282	5.11617	5.39793	5.03636	5.51012	5.5824	5.6343	4.78397	4.83348	4.42406
CC2G_000654	6.26946	6.4697	6.72234	6.15288	6.57941	6.64317	6.71565	6.70617	5.52771	5.15669	5.17362	4.98344	4.76464	5.14704	5.01529	5.59411	5.4685	5.83016	5.11864	4.83736	4.77289	5.36121	5.46179	5.51982	4.75178	4.72179	5.01385
CC2G_000655	4.90403	5.35315	5.18973	6.7082	6.32892	6.83043	8.24501	8.23274	5.90868	6.04478	5.54474	5.55312	5.65919	5.90282	5.536	5.4945	5.93604	5.45135	5.16468	5.13831	5.13296	4.57385	4.3656	4.43647	5.30775	5.05596	5.06278
CC2G_000656	5.83455	6.8754	7.1027	6.28236	6.69003	6.40565	7.38436	7.35154	6.08092	6.62503	6.21838	6.28006	6.04734	6.48252	6.25903	5.60872	5.90871	5.66587	5.82186	5.70869	5.84317	5.56132	5.50069	5.43871	5.17241	4.97939	4.83078
CC2G_000657	3.96629	4.95731	4.92958	2.58761	4.27933	3.95541	5.49964	4.98233	4.23442	4.70595	4.39808	4.30877	4.25435	4.55068	4.26776	4.3843	4.7236	4.59779	4.79724	4.73601	4.56486	3.41989	3.37933	3.24568	3.97211	3.39338	3.48974
CC2G_000658	5.41444	6.18728	6.0848	4.79314	4.27933	4.74026	7.36599	7.2023	4.73252	4.70595	4.61602	4.47617	4.84913	4.5613	4.86937	4.64273	4.90051	4.8855	4.37486	4.10456	3.85409	4.34671	4.31661	4.21807	3.57824	3.33673	3.30981
CC2G_000659	8.33386	8.18835	8.21521	5.67554	6.13395	5.91579	4.90465	4.78865	6.06553	5.41585	5.47741	5.87697	5.65777	6.08424	5.76418	7.92021	7.54717	7.28062	6.43781	6.88932	6.82389	5.36121	5.13913	5.36029	3.69572	4.27108	4.03571
CC2G_000660	5.79625	5.41426	5.7056	5.57802	5.2417	5.58007	6.46779	6.69699	5.79377	5.32945	5.57808	5.53767	5.63488	5.56774	5.95847	5.42833	5.58531	5.8074	4.99531	4.96421	5.04657	5.54324	5.50616	5.62808	4.20396	4.65386	4.62699
CC2G_000661	3.64772	3.87449	3.97616	4.50553	3.96417	2.9254	3.72241	3.40556	3.57577	3.00349	3.0459	3.06649	3.46415	3.35451	3.40888	3.69632	3.70224	3.69079	3.43093	3.14075	2.95598	4.11175	3.94981	4.17609	3.13796	3.18455	3.7831
CC2G_000662	7.29385	6.88132	6.99211	7.33407	7.85514	7.83245	7.78417	7.69694	6.73277	5.47224	5.40864	5.64069	5.70526	5.98131	6.14503	6.7411	6.80883	6.52388	5.62961	5.46485	5.69038	6.93304	6.95579	7.08366	9.32448	9.07953	9.43804
CC2G_000663	5.55215	4.91949	5.1059	4.87754	4.45671	4.84331	5.57542	5.84355	5.2236	5.04029	4.99256	5.10635	5.09753	5.04739	5.20525	5.32398	5.30342	5.74287	5.02977	4.98715	4.89659	5.6819	5.77904	5.78013	4.69082	5.06034	4.43761
CC2G_000664	4.8833	5.72173	5.73594	6.15288	6.51073	6.53443	7.66782	7.46803	5.53667	5.87739	5.70275	5.65329	5.81118	6.20983	6.0071	4.34993	4.42558	4.56423	5.56963	5.47908	5.40905	6.46377	6.35016	6.07326	6.59938	6.42054	6.47653
CC2G_000665	1.18999	0	1.68643	3.22523	3.21045	3.15643	1.63904	1.99216	3.54056	2.73816	3.0459	2.96618	3.15375	3.42593	3.16196	4.46145	4.69988	4.91242	4.29866	4.60492	4.71645	5.24969	5.43718	5.37149	5.86178	5.22154	5.4975
CC2G_000666	5.57495	5.34746	5.3384	4.95727	4.79049	4.07317	5.42513	5.7312	5.32019	5.80056	5.71928	5.74864	5.70526	5.83447	5.88724	4.95877	5.23171	5.19709	5.62442	5.52489	5.4596	6.2147	6.21189	6.24347	5.26276	5.57681	5.0715
CC2G_000667	7.78994	8.11075	8.16272	5.85279	6.18522	6.44986	6.63531	6.90251	5.6689	5.34212	5.20598	5.29736	5.29485	5.45844	5.46439	6.07286	6.00864	6.00417	5.52944	5.57875	5.62715	5.85017	5.9667	5.89585	5.49444	5.22545	5.32591
CC2G_000668	9.46273	9.85086	9.71143	6.40117	6.53069	6.56491	8.25195	8.02758	5.90176	6.25224	6.37267	6.2099	6.26522	6.13603	6.20033	5.6454	5.63341	5.84561	6.39575	6.21929	6.03743	6.29576	6.39214	6.32448	5.36208	5.49828	5.4245
CC2G_000669	8.29955	7.78761	7.8244	5.23831	5.54621	4.59029	5.63802	5.87236	5.17277	5.45369	5.45425	5.46397	5.52864	5.36663	5.87171	6.15589	6.17368	6.34771	5.32481	5.21077	5.08671	4.90925	4.63235	4.88513	3.66147	4.07724	3.20275
CC2G_000670	6.81366	5.72612	5.88265	5.47342	5.38014	5.2706	6.39157	6.56455	5.36616	5.29078	5.43618	5.29507	5.24469	5.23804	5.44735	4.86724	4.72621	4.74282	4.81862	4.36323	4.31749	6.40791	6.4948	6.52506	6.9615	7.31737	6.8119
CC2G_000671	4.56966	5.1848	5.51377	4.87754	4.61465	4.42291	4.60053	4.72689	6.13504	5.92194	6.12558	6.07459	5.97397	5.83884	5.93013	6.20478	6.14567	5.94933	5.90273	6.13704	6.18916	5.0232	4.88005	5.08889	5.10179	5.27151	5.00477
CC2G_000672	3.04647	4.83261	4.83663	4.14595	4.07705	3.68642	4.08242	4.27548	5.66482	5.16242	5.2929	5.33584	5.19859	5.1564	5.37709	5.87356	5.84646	5.81169	5.28147	5.26811	5.41694	5.32569	5.33018	5.41003	4.15556	4.35904	3.94371
CC2G_000673	7.2224	8.61719	8.45102	8.51887	8.71265	8.68412	9.07436	8.90344	8.0264	8.1271	7.78716	7.70824	7.84979	8.04633	7.87133	8.24276	8.22821	8.13937	7.54392	7.59707	7.82234	7.29198	7.20661	7.3169	7.64109	7.51619	7.47582
CC2G_000674	9.94926	11.9695	11.8187	10.1056	10.9674	10.2958	9.12903	9.08363	8.5018	5.76526	4.93453	7.94114	4.66362	6.7486	5.54315	9.66518	9.77294	9.3176	7.90574	8.28675	8.4105	4.76694	5.057	4.78256	4.63307	5.02939	5.32226
CC2G_000675	3.96629	3.96639	4.14074	4.27603	3.21045	3.44562	3.82533	4.16004	3.28803	2.70717	2.9267	2.88304	3.4511	3.13528	3.18042	3.97216	3.75435	3.36413	3.16131	2.92004	3.0299	5.42382	5.05949	5.19568	3.10436	3.64739	2.99842
CC2G_000676	8.39784	7.35788	7.42751	6.63735	6.93435	6.77067	6.84171	6.79483	6.70123	5.92025	6.42309	6.65777	6.58712	6.55599	6.74543	7.54436	7.28907	7.13165	6.75621	6.92764	6.94141	8.81424	8.89689	8.97262	6.79638	7.34546	6.9448
CC2G_000677	7.46144	6.62348	6.7962	6.7082	6.85741	6.59476	6.7618	6.82673	6.02788	5.73485	5.90681	6.14383	6.05275	6.18717	5.94234	6.99573	6.95293	6.57784	5.87676	6.06068	5.7925	5.36534	5.38467	5.24524	4.13906	4.55799	4.28851
CC2G_000696	0.400949	0.402256	0.708306	0	0	0	0	0.220902	1.36797	1.18666	1.4286	1.3222	1.13251	1.06755	1.0667	0.628776	0.416963	0.785514	1.75363	1.42711	1.83349	4.39992	4.726	4.39682	3.63818	3.68191	3.68423
CC2G_000678	3.46447	4.3083	4.41172	3.22523	3.96417	3.44562	5.48923	5.32964	2.98171	3.35295	3.24173	3.24834	3.66963	3.45657	3.40888	3.83531	3.59201	3.31656	3.38253	3.41062	3.35971	4.3674	4.47754	4.41136	4.38978	4.31573	4.23517
CC2G_000679	7.95983	8.08536	8.06792	7.47619	7.87479	7.55727	7.19715	7.12575	6.94959	6.89889	6.87206	6.87236	6.98583	7.01429	7.00945	7.82471	7.7771	7.753	7.4145	7.62706	7.62865	7.29684	7.29251	7.3399	7.39145	7.43925	7.45097
CC2G_000680	7.49855	7.72101	7.58107	6.5881	7.15612	6.76193	7.18269	7.34422	6.47284	5.83143	5.92117	6.03937	6.01556	6.12891	6.13324	7.2816	7.08343	7.07619	6.53512	6.59846	6.46516	6.5649	6.617	6.5687	5.85169	6.37906	5.71068
CC2G_000681	9.0099	8.5667	8.72994	6.63735	7.15612	7.33951	7.74751	7.86097	7.47871	7.0532	7.29943	7.35305	7.35284	7.15172	7.20971	7.59496	7.63596	7.45644	7.13541	7.16059	7.10973	6.77237	6.99588	6.88564	6.70965	6.85927	6.84152
CC2G_000682	3.9059	4.27274	4.15364	6.31299	7.16892	5.97751	6.16178	5.86418	5.29928	5.17663	4.24455	5.18532	4.78298	6.02157	5.07815	7.25037	7.13986	6.61601	6.1708	6.17751	6.57506	5.29361	4.92705	5.13124	3.39582	3.53858	3.1042
CC2G_000683	3.51924	1.62771	1.68643	3.22523	2.99751	2.79434	4.95091	5.17305	1.59085	0.994679	1.20778	1.17018	1.28737	1.14485	1.35362	1.51463	1.59009	1.41689	1.34588	1.61562	1.71045	0.234393	0.363748	0.400752	0.266241	0.382322	0.856451
CC2G_000684	8.1867	8.25365	8.29962	5.97275	6.54056	6.17484	6.50444	6.45726	5.4774	6.08301	5.84925	6.00045	5.80734	6.10735	6.07031	6.17455	6.16793	6.16503	5.5804	5.63614	5.70012	6.4139	6.30168	6.29144	4.93975	5.19789	4.7838
CC2G_000685	6.26746	6.61876	6.74596	4.87754	5.06137	5.53972	6.41651	6.4215	5.10811	4.61287	4.79968	4.65865	4.58517	4.40903	4.50588	5.12833	5.13085	5.42729	5.01132	4.77279	5.04911	6.08574	5.91278	6.02678	5.01402	4.97011	5.0496
CC2G_000686	4.27562	3.4124	3.28035	3.84426	2.7476	3.2594	2.87652	3.16063	3.10734	3.36292	3.14714	3.20008	3.36328	3.21809	3.43984	3.05655	3.36951	2.96194	3.27173	3.24914	3.06045	4.47432	4.25728	4.10629	4.39673	4.24823	3.83524
CC2G_000687	7.14831	6.60691	6.42792	5.85279	6.0396	5.74885	4.12339	4.25061	5.25652	4.57045	4.53683	4.93708	4.65511	4.80104	4.94957	6.04209	5.975	5.75482	5.1211	5.08612	5.23694	6.07319	6.34914	6.30222	5.52651	5.77102	5.66243
CC2G_000688	5.70173	5.96766	6.08143	5.36065	5.16715	5.29505	6.38316	6.30557	4.69298	5.06494	4.98761	4.63343	4.82152	4.83933	4.86082	4.56162	4.29797	4.49468	4.32878	4.46482	4.33008	4.83985	4.82565	4.56563	4.41055	4.37319	4.50354
CC2G_000689	7.49429	7.33076	7.51511	6.7082	6.19775	6.55482	7.1047	7.28575	6.59584	6.75478	6.66187	6.53767	6.63478	6.77846	6.82602	6.85032	6.82597	6.82807	6.37632	6.44739	6.45753	6.52677	6.53996	6.59203	6.5362	6.77251	6.53287
CC2G_000690	5.76826	5.32449	5.76986	5.89389	6.84152	6.80512	6.16832	6.04497	6.92421	5.95529	6.15571	6.328	5.94402	6.04948	6.18213	7.00986	7.05825	7.25298	6.2267	6.18992	6.23341	4.93998	4.9216	5.11578	5.85675	6.1289	5.8616
CC2G_000691	4.76929	5.40334	4.95928	5.72193	6.01147	5.73104	6.29625	6.02678	5.07157	5.45135	5.31483	5.36458	5.33091	5.31112	5.36504	5.17707	5.22249	4.95447	5.51268	5.62704	5.20538	4.55593	4.49966	4.62923	3.36777	3.65899	4.01778
CC2G_000692	7.46581	7.94462	7.83646	6.98043	7.18789	7.50059	6.51474	6.35598	6.37629	5.85812	5.95457	5.99904	6.06244	6.01901	6.02763	6.58568	6.43066	6.43106	6.33876	6.43909	6.30746	6.19977	6.3532	6.22918	7.68651	7.73746	7.62174
CC2G_000693	2.86804	4.31996	3.39345	2.94136	2.06196	1.57485	1.97375	2.3608	1.72235	1.64482	1.5679	2.20981	1.62607	1.59393	1.9128	2.38022	2.22843	2.09913	1.96561	2.17098	2.14993	6.73702	6.75286	6.61656	3.71811	4.05984	3.86564
CC2G_000694	5.69877	6.97649	6.78173	6.86113	5.84611	6.00741	8.3004	8.0367	5.58067	6.1637	6.0971	6.00045	6.62538	6.42944	6.17525	5.66727	5.6138	5.43102	5.93386	5.82629	5.48984	6.80612	6.84211	6.53257	5.13961	5.14525	4.76241
CC2G_000695	3.85358	4.1734	3.37153	0	2.44513	2.30978	2.77732	3.10622	4.04643	2.82734	3.3918	3.93116	3.54006	3.48657	3.70497	3.63421	3.50951	3.51928	2.97801	2.70159	3.01957	9.00448	9.06652	9.11965	9.39154	9.3576	9.39527
CC2G_000697	3.78817	3.12395	3.37153	4.70349	4.82322	4.74026	3.84179	4.43848	5.50048	5.32435	5.53118	5.5703	5.66627	5.84319	6.41814	5.54938	5.684	5.66429	5.71679	5.89766	6.00114	6.52124	6.72027	6.65527	6.22247	6.62656	6.15824
CC2G_000698	6.54991	6.36383	6.31473	4.87754	5.11523	4.93949	5.45219	5.25034	4.66873	5.27501	5.28686	4.86772	5.00904	4.89352	5.16412	4.86993	4.90282	4.74582	4.90967	4.77609	4.73235	5.26521	5.30737	5.20823	4.59728	4.81286	4.9204
CC2G_000699	3.10135	2.23207	1.53688	4.87754	4.91719	4.07317	6.77685	6.64308	4.38096	4.72928	4.45662	4.32236	4.70268	4.71811	5.21647	3.52891	4.36654	4.57438	4.27234	3.92013	3.62797	4.5194	4.45885	4.38949	2.21663	2.15022	2.52661
CC2G_000700	3.40753	2.50152	2.48431	4.87754	4.7227	4.77543	5.72044	5.8099	4.78611	4.93387	4.84969	4.80457	4.87379	5.08465	5.04077	4.36531	4.25159	4.25073	4.32878	4.31417	4.1665	5.31933	5.4276	5.36029	5.64227	5.59805	5.37252
CC2G_000701	3.74286	2.50152	2.93655	5.76688	6.23472	5.89994	6.92518	6.7266	5.37118	5.74633	5.59773	5.74864	5.56543	5.93853	5.65954	5.99838	6.02145	5.91381	6.27721	6.40435	6.46326	6.45799	6.64951	6.53173	5.43147	6.02741	5.4279
CC2G_000702	5.15383	5.4251	5.81116	4.60791	4.07705	3.68642	4.53118	4.88874	4.70098	4.33226	4.61923	4.70434	4.65795	4.40903	4.63526	4.85911	4.71836	4.64027	4.30733	4.61232	4.76673	5.32146	5.45803	5.32998	4.46452	4.87882	4.41037
CC2G_000703	6.12903	6.54118	6.36552	4.00298	5.06137	4.87609	7.38857	7.19906	5.351	5.52206	5.31878	5.17037	5.72572	5.58864	5.71122	5.27598	5.35496	5.56938	5.54052	5.28209	5.26999	6.04263	6.02885	5.92148	5.536	5.68287	5.70789
CC2G_000704	1.25598	0.851145	1.18127	2.11792	1.82392	1.86343	1.3932	0.412428	1.89954	1.64482	1.78907	1.49215	1.60266	1.53772	1.74936	1.48678	1.13543	1.35544	1.82781	1.49273	1.60385	1.61265	1.8858	2.07106	1.49776	1.38865	1.77894
CC2G_000705	5.52564	6.73873	6.89171	8.70361	8.959	8.99885	7.08582	7.17117	8.11433	7.67739	7.45426	7.41038	7.21779	7.45036	7.44206	7.99223	8.08676	8.16478	7.30027	7.41656	7.48164	5.44539	5.37872	5.32231	6.13988	5.61005	6.10189
CC2G_000706	5.31345	6.21253	6.21669	6.31299	5.79751	5.94698	4.73878	4.51355	4.71683	4.70595	4.47798	4.4225	5.09963	5.25775	5.07569	4.20363	4.38979	4.33274	4.8095	4.63429	4.70038	5.35915	5.45991	5.16167	4.07977	4.49468	4.07093
CC2G_000707	4.64548	5.60743	5.7056	5.6276	4.9472	5.24573	4.30056	3.89712	4.27783	4.02184	3.56145	3.56266	4.40066	4.36933	4.30608	3.69632	3.9636	3.73368	3.94026	3.89608	3.83654	4.68356	4.42843	4.20142	3.13796	3.47438	3.20275
CC2G_000708	3.79928	3.20165	2.21563	4.39534	4.18173	4.37785	7.09099	6.66206	4.68494	5.72908	5.03401	5.00044	5.2616	5.76118	5.41849	4.5716	5.06222	5.0203	4.86045	4.79247	4.92454	4.76694	4.93518	4.87991	3.88573	3.84311	4.15539
CC2G_000713	1.8331	3.99577	4.00493	2.11792	2.87796	2.30978	4.3589	4.27548	1.89954	3.72195	3.54131	3.78833	3.29189	3.60071	3.69217	0.906124	0.654876	1.11707	3.06237	2.83405	2.68242	3.90077	3.65367	3.56478	2.52676	3.60004	3.20275
CC2G_000709	8.23403	8.36689	8.47948	6.88171	7.35951	7.15817	6.09469	6.30557	6.94623	6.44889	6.48065	6.67729	6.36686	6.94169	6.85432	7.59985	7.49873	7.85782	7.39988	7.70222	7.89972	7.3124	7.34384	7.44393	6.95562	6.90139	7.1336
CC2G_000710	8.10288	7.58023	7.69247	6.34299	6.25885	6.28878	6.30221	6.44635	6.49829	6.39156	6.65953	6.617	6.66123	6.54088	6.64934	7.06622	6.90071	7.03514	6.94302	6.82948	6.61076	6.76459	6.65609	6.80943	5.88671	6.09087	6.18058
CC2G_000711	4.74651	3.95147	4.20413	5.10462	4.65157	4.42291	6.5096	6.32357	4.51397	4.62536	4.56704	4.71125	4.83915	4.64682	4.74471	4.29879	4.34291	4.21658	4.34149	4.1762	4.07966	4.81595	4.88286	4.55911	3.93435	3.93183	3.72901
CC2G_000712	5.37414	5.10616	4.98116	5.10462	5.08855	5.43361	8.00395	8.04666	5.351	5.44197	5.10207	4.89526	5.20831	5.50132	5.38506	5.06618	5.75093	5.91247	5.5515	5.10722	5.40509	4.32571	4.75999	4.42934	3.70696	3.47438	4.18783
CC2G_000747	8.03929	7.44299	7.50255	6.21907	6.19775	6.33667	8.55993	8.54926	6.22926	6.42528	6.25801	6.038	6.47475	6.54088	6.44319	6.97458	7.06755	7.11437	6.55709	6.36547	6.48407	6.41787	6.3723	6.38192	4.96806	5.1203	4.93481
CC2G_000714	3.76569	4.9423	4.9069	5.52667	4.65157	4.66722	5.59497	5.78414	5.21804	5.05882	4.75955	4.66932	5.03551	5.01172	5.3262	4.22907	4.13849	4.79293	4.94898	4.46482	4.80031	3.73864	3.68617	3.48451	2.2782	2.82146	2.2476
CC2G_000715	5.83455	6.99297	7.04846	7.95542	7.87089	7.91757	8.5215	8.43734	6.24301	6.27223	6.08787	5.96912	6.50821	6.86881	6.42493	6.97144	6.95516	6.52213	6.32602	6.35117	5.9326	6.4009	6.36328	6.45746	5.59465	5.9134	5.60352
CC2G_000716	3.70791	4.99417	5.2022	4.50553	5.46556	4.66722	3.70452	3.63423	4.7403	4.40649	4.26107	4.48425	4.33824	4.52561	4.57027	5.41176	5.3684	5.32281	4.93786	5.11506	4.96278	5.25414	5.31155	5.53982	4.98662	5.12867	5.17223
CC2G_000717	4.28355	3.6153	3.37153	2.11792	3.8417	4.42291	7.18269	6.93018	4.90854	4.53117	4.7508	4.59289	5.23139	4.8335	5.13839	4.38807	4.54282	4.67841	4.79416	4.21073	4.1429	5.55231	5.50434	5.55627	4.93975	4.73281	4.57887
CC2G_000718	5.99293	7.24314	6.98851	6.84025	6.34027	6.34839	6.55023	6.51321	5.82702	5.39898	5.60422	5.50029	5.61892	5.38267	5.56789	5.91071	5.8259	5.65794	5.50892	5.62338	5.51764	5.9862	6.08965	5.84183	6.41637	6.66445	6.5154
CC2G_000719	7.63889	7.56193	7.67914	7.25739	7.60987	7.35122	7.58101	7.47877	6.74249	6.53193	6.24976	6.29507	6.22074	6.6259	6.06287	7.43019	7.37438	7.0449	6.84149	6.85387	7.1079	6.36533	6.4548	6.16303	8.267	8.24039	8.23175
CC2G_000720	5.7739	4.09412	4.07443	6.0835	6.75933	6.87975	6.92904	6.92822	6.14386	4.62949	4.44943	4.52007	4.46374	4.91022	4.92241	5.42649	5.52209	5.88555	4.35827	4.30049	4.51057	3.92889	4.37759	4.12406	6.63218	6.48059	6.78033
CC2G_000721	6.94576	5.51408	5.54349	6.88171	6.0396	6.56491	9.45446	9.53997	6.16713	6.54842	6.33708	6.22927	6.52854	6.6098	6.52579	6.52022	6.71727	6.89977	6.36495	6.22171	6.15535	6.26521	6.22633	6.28059	6.02559	6.04961	6.13138
CC2G_000722	6.15304	6.79204	6.83877	6.66135	6.57941	6.09355	5.44143	5.56466	6.95294	6.04478	6.42126	6.44753	6.13868	6.15601	6.20372	7.13456	7.00763	7.09393	6.19902	6.36547	6.33479	6.75833	6.84427	6.90761	9.1318	8.83339	9.10027
CC2G_000723	6.02876	6.00064	6.20744	6.86113	6.91928	6.56491	6.68177	6.74896	7.34862	7.21134	7.28789	7.29162	7.37114	7.24189	7.37405	7.46317	7.55491	7.60327	7.1427	7.24154	7.18214	6.57295	6.62959	6.77751	6.95208	7.02977	7.0643
CC2G_000724	4.12482	4.58451	4.12772	8.26055	8.32685	8.35554	6.92518	6.9065	6.97454	4.49534	4.59988	4.48828	4.2804	4.25631	4.35564	4.07861	4.19991	4.09965	3.8182	3.84046	3.75794	5.86189	5.67438	5.71273	5.30775	5.7549	5.41425
CC2G_000725	5.13203	4.99417	4.85254	4.27603	4.85523	4.28326	6.38878	6.2217	4.28848	5.04029	5.18449	4.87389	4.89322	4.88228	5.15714	3.88416	3.95472	4.1992	4.81559	4.79247	4.56486	5.36534	5.52964	5.28922	5.40066	5.86665	5.23568
CC2G_000726	6.29911	5.91096	5.70121	6.04752	6.06719	5.63855	6.30815	6.34428	5.78251	5.85282	5.6551	5.55312	6.03864	6.06944	5.90121	5.98725	5.95398	5.75482	5.52944	5.89463	5.76029	5.25192	5.15547	5.13781	5.93291	5.82092	5.88158
CC2G_000727	3.94644	3.99577	4.19167	5.93386	6.01147	6.43894	5.60465	5.84355	5.93604	5.3218	5.34031	5.19766	6.06136	6.16067	5.93421	5.93281	5.80876	5.90042	6.03908	5.85776	5.99325	6.66861	6.36127	6.5622	8.21481	8.11652	8.70015
CC2G_000728	5.80455	5.08582	5.05867	5.10462	4.9472	5.22043	7.7009	7.59321	5.04041	5.64163	5.57643	5.17786	5.79319	5.6396	5.95714	3.58908	3.51556	3.80437	4.57478	4.44008	4.22611	5.905	5.79701	5.75611	3.40964	4.18545	3.61433
CC2G_000729	5.11435	5.62164	5.4314	7.17641	6.7251	6.28878	9.02926	9.048	6.35365	7.53684	7.1969	7.33025	7.04998	7.19495	7.21419	6.53049	7.22265	7.02839	6.828	6.67906	6.88491	7.77663	7.71184	7.65652	6.8844	7.18525	6.99035
CC2G_000730	3.27055	2.82982	2.99507	2.11792	1.5387	0	1.3932	1.99216	7.52222	5.85636	6.17327	6.48729	6.48919	6.94912	6.83333	5.92115	5.85483	5.46415	5.07616	5.09143	6.09268	5.66361	6.08356	5.59183	5.56408	5.59503	5.1641
CC2G_000731	5.20902	5.1848	5.29829	3.84426	3.30619	2.79434	4.95848	5.16641	3.83021	3.93756	4.08204	4.26722	4.24682	4.13368	4.32279	3.65937	3.79472	3.95179	3.95137	3.94378	4.08957	5.20898	5.53857	5.33952	3.60251	4.32304	3.6497
CC2G_000732	7.63036	7.34081	7.42086	5.10462	6.12084	6.05112	6.21329	6.56455	6.36878	6.10695	6.1017	5.99055	6.20333	6.09888	6.42879	6.81785	6.78083	6.78138	6.29911	6.44842	6.66313	6.79241	6.83778	6.80668	6.69984	6.99702	6.93169
CC2G_000733	6.46001	6.82923	6.74596	6.92201	7.36508	7.07591	5.25121	5.54945	7.78545	6.62503	6.88478	7.3536	6.47072	6.79654	6.84278	8.38439	8.13203	7.78212	7.1956	7.77242	7.96812	6.47526	6.6659	6.53423	8.09267	8.38052	8.41507
CC2G_000734	7.14287	6.85751	7.16297	5.03282	5.74722	5.96233	7.03483	6.71528	5.5322	5.86165	5.94182	5.51615	6.16589	5.9249	6.12373	5.24929	5.17358	5.58619	5.58575	5.46485	5.28085	5.48192	5.43718	5.36963	4.08839	4.46855	4.32543
CC2G_000735	6.87795	5.98973	5.92842	5.17301	5.89312	5.80099	8.05249	8.1427	6.50744	6.13196	6.2067	6.10243	6.43554	6.16067	6.52579	6.35675	6.73034	6.9145	6.31316	5.94238	5.78032	6.64168	6.86145	6.82513	5.67124	5.83377	5.57314
CC2G_000736	7.82025	7.65234	7.76153	6.94175	7.66508	7.47941	7.44757	7.52357	8.05241	7.47148	7.97068	7.98949	7.97671	7.85474	8.06843	8.78751	8.67419	8.6246	8.06788	8.22445	8.19735	7.89255	7.95297	8.07491	9.01402	9.02006	9.14794
CC2G_000737	5.66576	4.79132	4.9145	5.36065	5.56568	5.22043	5.88831	5.99345	5.93942	4.75602	4.95244	5.91633	5.2409	5.72231	5.53779	7.00496	6.89317	6.48585	6.15407	6.73859	6.58997	5.83984	5.9994	5.88155	5.14788	5.40148	5.15592
CC2G_000738	3.45044	2.61945	2.35621	3.66589	4.23136	3.89271	3.70452	3.55521	2.8441	2.72275	2.57687	2.97768	3.02758	3.41036	2.84086	2.365	2.38208	2.13614	3.43884	3.41062	3.74545	3.77007	3.62713	3.67135	2.2782	2.47289	1.93999
CC2G_000739	5.74259	3.63411	3.5961	5.72193	5.14143	3.89271	5.71598	5.79278	6.3125	5.44432	5.85334	5.91483	5.93233	5.76118	6.19694	6.28277	6.55045	6.74964	6.12004	6.11898	5.68875	6.95713	7.08268	7.12507	5.6097	6.02068	5.53897
CC2G_000740	3.42197	3.95147	3.79037	3.84426	3.63598	4.28326	5.62381	5.55961	4.10785	3.42138	3.71324	3.49227	4.00933	3.97869	3.84459	4.01178	3.59773	3.58098	3.60273	3.08866	2.96678	4.26963	4.2659	4.25483	2.94263	3.32221	2.88427
CC2G_000741	5.80455	6.44329	6.12139	6.01062	5.93864	5.78382	5.9274	5.79278	6.4937	6.04012	6.38686	6.43612	6.22649	6.18489	6.35049	6.81155	6.76314	6.70414	6.38658	6.3742	6.44697	6.76224	6.78773	6.77961	5.96369	6.32912	5.85657
CC2G_000742	7.78296	7.82799	7.89141	6.04752	6.25885	6.47147	6.45447	6.28429	6.11423	5.688	5.8547	5.96479	6.0233	5.66278	5.63131	6.35097	6.16793	6.10562	6.1335	6.06203	5.80609	6.4139	6.58202	6.5687	6.38523	6.56316	6.66694
CC2G_000743	6.03112	6.79204	6.80441	5.36065	5.19243	5.43361	5.27565	5.19276	4.88065	4.54876	4.742	4.78834	4.65795	4.39328	4.55267	5.39313	5.12492	5.03016	5.00866	4.95841	4.98419	4.95646	4.94596	4.92115	6.30983	6.30717	5.97285
CC2G_000744	8.05791	9.66163	9.68167	7.20935	7.9434	7.78577	7.76595	7.69464	6.85065	7.99581	7.61511	7.55935	7.97927	8.14986	7.98428	8.61534	8.60297	8.3433	8.50067	8.47125	8.06517	6.84132	6.70608	6.64608	6.54719	6.41199	6.16844
CC2G_000745	2.78106	3.671	3.77375	2.58761	2.06196	2.9254	0.858618	0.732788	1.28531	0.712044	0.628317	0.755073	1.19646	1.25354	0.488808	3.12137	2.73315	2.54678	1.59276	1.55548	0.993226	4.87207	4.85168	4.76284	3.94388	3.80185	2.86433
CC2G_000746	2.48338	3.01339	3.05131	0	0	0	0.573356	0	0	0.712044	0.522667	1.0877	0.261511	0.853982	0.428327	2.365	2.22843	2.13614	0.775363	1.21022	0.714572	4.85165	4.79319	4.74573	3.38186	3.39338	2.94247
CC2G_000748	0.146384	0	0.561119	0	0	0	0.982555	0	0	0.360207	0	0.248	0.376402	0.603213	0.299184	0.348376	0.364282	0.1523	0.161699	0.322199	0.60829	0.91231	0.895531	0.666326	5.50736	5.09063	6.02091
CC2G_000749	6.47221	6.26475	6.33752	7.19298	7.01449	7.29778	6.40825	6.57461	7.1128	6.80138	6.86533	6.74108	6.86128	6.91849	6.86434	7.55697	7.51128	7.47552	7.18858	7.13769	7.37224	6.31187	6.35219	6.27464	6.30244	6.30717	6.31701
CC2G_000750	7.85859	8.40981	8.48332	5.41814	5.42348	5.69475	6.86606	6.78188	5.8197	5.91348	5.83	5.83017	5.9158	5.63291	5.99412	6.02767	5.90986	6.15492	5.87092	5.90521	5.8461	6.70485	6.66753	6.71585	6.76849	6.97631	6.75213
CC2G_000751	6.16168	5.4781	5.27486	6.34299	6.13395	6.20095	6.43832	6.32654	6.70918	6.42766	6.69644	6.84986	6.80085	6.69016	6.97353	6.89338	7.03632	6.9764	6.92694	6.86088	6.87492	7.43709	7.46493	7.51384	7.15753	7.20615	6.84279
CC2G_000752	5.96113	6.44062	6.49029	7.33407	7.87869	8.27487	5.62381	5.46009	7.44697	6.20865	6.196	6.17538	6.31107	6.14076	6.22721	8.18002	8.12685	8.17343	6.52307	6.51309	6.47559	5.53045	5.5824	5.57092	6.05227	5.85157	5.97285
CC2G_000753	5.76259	5.07209	4.89158	5.03282	5.62258	5.71301	6.15191	5.80136	5.37118	5.81335	5.72227	5.48829	5.63632	5.61774	5.671	4.94605	4.75974	4.85807	5.38337	5.50912	5.32765	5.84132	5.89343	5.8512	5.1145	5.05596	4.7838
CC2G_000754	4.33789	4.50501	3.93191	4.60791	5.26571	4.84331	5.27565	5.18622	3.64371	3.23839	2.81925	2.91926	3.5645	3.9734	3.57152	4.34993	3.99426	3.5675	3.58145	3.32315	3.81281	3.02064	2.7761	3.02698	1.97773	1.21095	1.77894
CC2G_000755	9.28225	8.28596	8.46597	9.38615	9.37653	9.48401	7.91729	7.8661	8.51036	8.14672	8.25596	8.38928	8.33472	8.30367	8.0675	8.7038	8.66486	8.41093	8.1727	8.25165	8.24939	7.97545	8.08712	8.00201	7.98542	7.95654	7.87685
CC2G_000756	5.65051	4.88065	5.03794	9.2183	9.40384	9.65902	7.46228	7.51185	8.34419	7.59936	7.554	7.55408	7.32896	7.44989	7.62455	8.08483	8.15305	8.33958	6.9692	7.27747	7.24833	7.43218	7.57447	7.4819	8.7378	8.8809	8.58648
CC2G_000757	6.35099	6.08848	6.27395	4.60791	5.46556	5.31908	5.44682	5.67156	5.44444	5.38925	5.47741	5.52597	5.50674	5.45085	5.69205	6.01797	5.83803	5.87601	5.48238	5.8119	5.64069	5.72424	5.60637	5.8065	6.64246	6.80027	6.78299
CC2G_000758	3.559	3.89022	3.63342	2.58761	1.5387	2.30978	3.05653	2.99085	3.28803	3.36292	3.7252	3.62978	3.49627	3.52322	2.97377	3.65937	3.287	3.44748	3.88921	4.42336	4.2616	3.92331	3.86717	3.78183	4.49077	4.7972	4.89114
CC2G_000759	3.9564	3.12395	3.51842	2.11792	0	3.15643	2.8442	2.86543	4.00828	4.13096	4.4602	4.56268	4.56411	4.37335	4.21503	4.41418	3.89097	3.90966	5.38746	5.55783	5.36893	7.44539	7.17088	7.22828	6.85186	7.12066	7.2126
CC2G_000760	7.41886	7.43497	7.60593	6.53712	6.58896	6.36003	6.6067	6.59697	6.12319	6.00233	6.0704	6.16536	6.23699	6.05074	6.08385	6.44804	6.39828	6.14474	6.3324	6.31081	6.19146	7.30384	7.25671	7.24208	7.43096	7.53991	7.5131
CC2G_000761	6.93068	6.56343	6.68061	4.70349	5.14143	5.22043	5.65209	5.37061	5.05295	5.07408	5.11576	5.32463	5.1245	5.19326	4.91141	6.09147	5.89833	5.77403	5.63479	5.96712	5.66409	5.85164	5.78656	5.80513	4.88143	5.10342	5.13943
CC2G_000762	5.74833	6.10542	6.30897	6.68497	6.95665	7.11076	6.94246	7.05211	6.24575	6.55931	6.17327	6.31673	6.55623	7.25502	6.95153	6.25311	5.94952	6.00166	6.21638	5.60124	5.92293	7.06688	7.21109	7.10227	8.11868	8.11388	7.90579
CC2G_000763	5.40719	5.68613	5.89423	5.81047	6.24684	6.42792	7.81263	7.77422	5.78627	5.89125	5.44162	5.50824	5.28753	5.66934	5.34063	5.93023	5.84766	5.56089	6.20715	6.48112	6.61848	7.07445	7.44892	7.1366	7.33099	7.66525	7.63283
CC2G_000764	8.09557	8.69426	8.71859	7.24156	7.53773	7.33951	6.69315	6.78404	7.03113	6.29716	6.43224	6.5646	6.57063	6.6081	6.79567	7.66537	7.4351	7.30011	6.74349	7.01117	6.8699	7.15404	7.18346	7.14696	7.50767	7.72923	7.5811
CC2G_000765	6.96562	6.05048	6.16346	4.87754	5.28934	5.56003	5.54055	5.65744	6.37129	5.99593	6.25389	6.23646	6.3002	6.04066	6.30601	6.91509	7.00601	6.84214	7.05856	7.12223	6.87707	7.39789	7.51147	7.54921	7.31455	7.20714	7.28655
CC2G_000766	10.0334	10.452	10.5376	9.35705	9.26479	9.08023	9.9259	9.93523	8.34992	9.36253	8.93036	8.87159	8.68956	9.19339	8.93242	8.93778	9.35956	9.13824	8.45093	8.45385	8.85645	7.22096	7.07718	7.24208	8.683	8.79579	8.73556
CC2G_000767	5.36295	5.56397	5.86707	4.14595	3.77633	4.50903	5.42513	5.55961	4.21222	4.34741	4.60958	4.43506	4.77515	4.47787	4.88352	4.59135	4.44791	4.81307	4.88672	4.61968	4.57548	5.74179	5.73932	5.79546	7.62341	7.91724	7.45347
CC2G_000768	7.21723	6.36665	6.40652	8.76583	8.09854	8.59833	7.96127	8.01287	7.5177	6.45823	6.66342	6.40878	7.46986	7.32156	7.24575	7.15903	6.80883	6.66748	7.03461	6.95117	6.8157	7.40941	7.17088	7.36019	8.01906	8.10702	8.30845
CC2G_000769	5.42164	5.07897	4.54501	5.85279	5.74722	5.19467	7.02406	6.98585	4.8736	6.24956	5.78787	5.69393	5.57449	5.79155	5.58531	4.67394	5.23355	5.07374	5.58753	5.38934	5.4423	5.99288	5.90175	5.96773	4.63895	4.55179	4.45771
CC2G_000770	5.63509	6.07822	5.81928	5.97275	5.50645	4.97018	6.47835	5.95549	4.84502	6.02764	5.61229	5.27657	5.62765	5.76272	5.39497	4.08326	4.5159	4.30049	4.76614	4.59749	4.79729	4.55953	4.42843	4.71087	6.59031	6.15166	6.50256
CC2G_000771	3.49211	3.6153	3.70529	5.67554	5.21727	5.2706	6.42746	6.53139	5.4774	5.68403	5.61871	5.51812	5.74188	5.68721	5.75343	5.08487	4.91889	5.19709	5.32053	5.15866	5.00529	5.4724	5.31986	5.41364	4.39673	4.80766	4.46435
CC2G_000772	1.69717	2.54191	2.05985	4.79314	4.57676	4.46662	5.41417	5.11912	4.34059	4.84769	4.82212	4.65865	4.71365	4.77392	4.79348	3.52891	3.64818	3.72156	4.20899	4.1561	3.80681	3.84872	3.63381	3.4497	2.98017	3.13557	2.78172
CC2G_000773	2.75847	1.90048	1.61359	4.50553	4.53784	4.50903	3.08447	2.65416	3.57577	2.85588	2.9267	3.05568	3.5026	2.84227	2.91987	4.00198	4.22598	3.96213	4.4275	4.39789	4.1665	3.12156	3.16544	3.07346	2.05012	2.57438	2.39384
CC2G_000774	5.68086	5.96394	6.13772	6.25106	6.68113	6.33667	4.73878	4.69959	5.90176	5.73869	5.88566	5.6764	5.75521	5.70964	5.7488	5.70402	5.72766	5.89368	5.39562	5.20589	5.32974	5.52309	5.57894	5.55135	6.62775	6.31452	6.84534
CC2G_000775	3.9564	4.77447	4.61198	5.03282	4.45671	5.02966	4.23975	4.5343	5.36113	5.21569	5.31878	5.43924	5.72165	5.48097	5.22316	4.9764	4.85112	5.09974	5.55515	5.52096	5.36485	5.40992	5.42375	5.42444	6.10844	5.80535	5.98213
CC2G_000776	9.50024	10.5901	10.5098	5.81047	6.67217	6.58488	3.53268	3.18708	4.50486	2.20665	1.59422	1.3926	1.40029	1.10671	1.41725	1.92063	2.1528	1.96156	1.62085	1.52445	1.80971	1.99964	2.18773	1.87511	2.01438	1.59594	2.33711
CC2G_000777	6.86347	6.14201	6.10155	6.01062	6.64496	7.13127	6.16832	6.2217	6.73472	6.38546	6.58357	6.54348	6.55165	6.52379	6.46217	7.15129	7.10817	7.16057	6.81057	6.7487	6.71767	6.89362	6.90973	6.9777	6.56891	6.53354	6.49933
CC2G_000778	4.00519	4.83261	5.2084	7.56794	7.64233	7.72859	6.31995	6.24076	6.41082	6.19475	6.13457	5.85064	6.12437	6.10373	6.24485	5.58265	5.58387	5.85119	5.57502	5.81029	5.83583	6.27071	6.09086	6.23634	6.24578	6.20208	6.00734
CC2G_000779	4.84629	4.43167	4.54501	7.67794	7.991	8.281	9.27177	9.02802	7.40477	7.94565	7.77571	7.63163	7.55846	7.75117	8.56756	5.63909	5.83682	6.12417	6.15287	6.10593	5.95038	8.40391	8.60104	8.47288	5.98692	6.60423	5.88653
CC2G_000780	6.56463	5.66343	5.86707	6.4294	7.37063	7.07591	7.74204	7.74558	7.20704	6.66792	6.94417	6.96045	7.01881	6.81956	7.23531	7.1165	6.95516	7.12073	6.78287	6.77448	6.68617	7.19977	7.31659	7.3644	9.0528	9.01978	9.09199
CC2G_000826	6.82865	5.68162	5.92089	5.30077	4.32576	5.14174	4.08242	4.40506	5.24016	3.79746	4.15014	4.05028	3.7464	3.78705	3.68573	5.82434	5.82225	5.64033	5.15511	5.37419	5.36485	3.40395	3.54444	3.3922	3.56595	2.66919	3.18678
CC2G_000827	5.84799	6.24041	5.99087	5.41814	5.69512	6.05112	7.44083	7.27808	5.64838	5.6559	5.5665	5.4983	5.53947	5.47162	5.37508	5.30418	5.55918	5.62088	5.67888	5.52292	5.45001	6.35397	6.23514	6.31	5.81321	5.70542	5.74106
CC2G_000828	2.48338	2.92453	3.07863	5.6276	4.61465	5.2706	6.13197	6.11897	5.78627	6.08301	6.0994	5.8522	5.9966	5.98525	6.07648	5.24514	5.43856	5.47683	5.85771	5.7428	5.75096	4.65354	4.67509	4.61044	4.54813	4.85381	4.40348
CC2G_000829	6.32816	6.05747	6.08817	2.94136	4.7227	3.68642	4.62926	4.80582	4.58481	4.54876	4.68192	5.04484	4.8291	4.93492	5.11219	5.99221	5.7637	5.63711	5.16945	5.50117	5.38108	5.15524	5.0395	5.02648	4.14733	4.44864	3.87564
CC2G_000830	4.02425	3.17621	2.74523	6.66135	6.23472	6.00741	8.19943	8.19414	5.05295	5.96515	5.37867	5.15526	5.58647	5.93446	5.51252	5.8749	6.08591	5.3348	5.27927	5.05388	5.18473	5.24969	5.07675	5.13343	2.76046	2.59867	2.88427
CC2G_000831	4.02425	3.8425	3.70529	3.46232	2.99751	3.75851	2.24525	1.31566	3.37054	3.54921	3.56145	3.37545	3.72488	3.32989	3.33667	3.34725	3.00673	3.34845	4.1183	3.90213	3.72016	4.38375	4.17263	4.27485	4.26606	4.05106	4.52909
CC2G_000832	6.467	7.03603	7.02583	6.51093	6.95665	6.68076	7.36599	7.1478	7.14392	7.31391	7.46187	7.54976	7.46946	7.34989	7.54044	7.36189	7.27888	7.39383	7.57296	7.55929	7.31161	7.36944	7.39143	7.39857	8.39672	8.26241	8.70085
CC2G_000833	6.22895	7.72101	7.74989	7.03657	6.67217	7.11763	6.22902	6.12923	5.52321	4.82981	4.89538	4.92228	4.31322	4.10495	4.54912	4.33048	3.93228	4.49824	4.72791	5.02922	4.73551	3.99423	4.01779	4.13286	10.5496	10.3326	11.0032
CC2G_000834	4.9645	6.01146	5.64749	4.95727	5.14143	5.36599	5.72488	5.52892	4.70098	4.72928	4.51977	4.11417	4.02702	4.2121	4.46129	3.09395	2.97194	3.64015	3.27173	3.12014	2.58771	4.17887	4.05311	3.95564	4.06238	4.38022	4.3327
CC2G_000835	6.0264	5.56397	5.72301	5.89389	6.19775	6.02213	7.04553	6.98019	5.48204	5.72134	5.43436	5.43924	5.53947	5.57124	5.66937	4.86993	4.928	4.91509	5.06086	5.10722	4.67756	5.4876	5.59443	5.38261	6.56428	6.65724	6.59769
CC2G_000836	7.31336	10.0535	9.92967	7.93587	9.10592	8.05632	7.74532	7.42283	6.73082	6.36451	4.5025	6.18904	3.8193	6.0545	4.82314	7.66303	7.9194	7.62663	7.68862	7.52638	7.97148	4.43564	5.34857	4.08829	5.59163	5.45568	6.58709
CC2G_000837	3.33304	3.45533	3.47796	2.11792	2.06196	2.1038	0.982555	0.220902	1.44615	0.831819	1.02641	1.52386	1.19646	1.38679	1.25259	3.47323	3.40254	2.96194	2.42984	3.19103	2.80778	2.4357	2.30957	2.61427	7.04579	6.76179	7.27339
CC2G_000838	1.43759	1.90048	2.16555	3.66589	3.1079	2.49	1.47988	1.65581	6.67306	5.64163	5.76488	6.38847	5.30213	5.49948	5.25616	6.85305	7.07372	7.43572	7.15416	7.32045	7.43431	4.37968	4.33313	4.42934	4.84119	4.42845	4.24291
CC2G_000781	6.07292	5.64963	5.7445	5.89389	6.0256	6.10742	6.76396	6.93409	6.50744	6.18775	6.35162	6.43612	6.63911	6.53819	6.48555	6.77388	6.88852	6.75782	6.2267	6.21565	6.37384	6.96802	7.02667	7.09722	6.81078	6.86929	6.66838
CC2G_000782	5.92101	6.89112	6.65814	5.30077	4.82322	4.90814	6.96141	6.87227	4.68494	4.49079	4.53343	4.13998	4.77777	4.34086	4.65188	3.60212	3.81939	3.81582	4.34571	3.932	3.89422	4.75128	4.8198	4.61673	4.62717	4.32304	4.71311
CC2G_000783	5.84799	4.82445	4.45406	6.4294	6.97861	7.67837	5.811	5.73568	7.32554	5.99593	6.36887	6.25312	6.17584	6.06323	6.08385	6.88206	6.87387	7.10914	5.80818	5.90521	6.00769	5.31721	5.56677	5.52818	7.65711	7.86874	7.64164
CC2G_000784	6.6438	6.59736	6.60746	6.04752	6.34027	5.65753	6.00253	5.95933	6.24848	5.82603	6.11653	6.02004	6.14173	6.04192	6.18556	6.87939	6.64112	6.69951	5.8753	6.17751	6.04891	6.42084	6.54528	6.60712	6.03676	6.20406	5.96818
CC2G_000785	5.22146	6.00425	5.76566	5.03282	4.9472	5.16845	7.37025	7.28575	4.62738	4.78599	4.7508	4.51219	5.05505	5.03475	5.2187	4.20363	4.42236	4.56423	4.50867	4.29591	4.04443	5.13607	5.09381	5.07981	3.88573	3.92224	3.40948
CC2G_000786	6.66217	6.68113	6.59333	6.61294	6.31747	6.44986	6.00983	6.24706	6.18149	6.30624	6.34872	6.24243	6.39609	6.18603	6.1273	6.59142	6.34998	6.49656	6.44175	6.40967	6.23229	6.21241	6.46138	6.23328	5.89656	5.93264	5.81043
CC2G_000787	6.53503	6.13543	6.2591	6.73106	6.75085	6.95838	6.30518	6.27815	7.07177	6.70663	6.81935	6.75951	6.7202	6.7455	6.69016	7.42836	7.33	7.39907	6.59829	6.63252	6.86702	6.05289	6.13979	6.09595	7.34275	7.60881	7.30331
CC2G_000788	7.0873	7.01645	6.83677	4.87754	4.7227	4.42291	3.64949	3.72729	3.52263	3.48671	3.32266	3.46802	3.55233	3.43365	3.47016	3.27581	2.86224	3.20776	3.43884	3.41908	3.32657	4.46282	4.45509	4.50927	3.30998	3.57577	3.2649
CC2G_000789	5.44305	4.8885	4.6026	2.94136	3.1079	2.1038	2.43077	2.16179	4.04643	3.86921	3.89359	3.97771	4.37671	4.13368	4.03408	4.34993	4.39964	4.8746	4.62765	4.27741	4.2484	4.89221	4.70394	4.69313	4.06238	4.02441	3.54088
CC2G_000790	9.52073	9.26039	9.41954	8.22072	8.67279	9.01182	8.40863	8.52159	7.97705	7.55545	7.68565	7.5008	7.33874	7.4191	7.70124	7.56573	7.52859	7.79664	7.15416	7.1961	7.03733	7.61509	7.72363	7.6147	8.17591	8.27801	8.20624
CC2G_000791	4.27562	4.86481	4.82054	4.95727	4.23136	4.46662	5.34657	5.11223	4.22337	4.49534	4.32924	4.2812	4.04015	4.80104	4.72599	4.22486	4.77243	4.98015	4.38309	4.44838	4.46181	4.40793	4.10692	4.2946	5.98692	5.9134	5.55149
CC2G_000792	3.71965	1.96131	2.21563	4.60791	4.32576	5.34273	4.81579	4.6811	4.10785	2.60999	3.29083	2.64424	3.3977	3.11621	3.49985	2.8751	2.97194	3.86626	3.24491	2.52468	2.90077	4.02061	3.95515	4.16326	2.18483	2.08293	2.55176
CC2G_000793	5.29786	5.4412	5.06551	5.47342	5.06137	5.02966	7.43542	7.31453	4.57614	5.38681	5.19957	5.17037	5.24469	5.32364	5.58357	3.72044	3.80464	3.83845	4.04245	4.07274	4.08463	6.19515	6.21857	6.21474	4.41741	5.05156	4.54796
CC2G_000794	4.8937	4.7227	4.86044	4.00298	4.65157	4.46662	7.19395	7.05391	4.21222	5.0152	4.74494	4.55886	5.00011	5.05241	4.99719	3.90536	4.30498	3.96727	4.5199	4.35884	4.22611	4.97546	5.01156	4.9135	4.75178	4.64222	4.72421
CC2G_000795	4.73499	4.34301	4.30009	6.0835	6.61723	6.75313	5.93509	5.74016	5.78627	5.13357	5.86419	5.53572	5.74723	5.39459	5.87171	4.8122	4.70254	5.11604	5.33967	5.40859	5.13296	6.13606	6.12919	6.14464	5.82873	5.79224	5.77883
CC2G_000796	3.64772	3.92117	3.94681	3.66589	5.35797	4.7042	6.08089	6.28122	4.88065	5.24026	5.42339	5.38199	5.29119	5.30271	5.60252	4.91765	4.70783	5.00287	4.99263	4.98715	5.01572	5.23625	5.38862	5.18514	5.23197	5.27905	5.20033
CC2G_000797	4.33026	4.81624	4.54501	4.70349	5.08855	4.93949	5.56554	5.6336	4.73252	5.22939	5.09748	5.01725	5.29667	5.31948	5.03063	4.39558	4.30847	4.36037	4.8337	4.65951	4.80933	5.39789	5.46928	5.45108	6.27628	6.09941	6.1397
CC2G_000798	6.97422	6.64913	6.81663	5.76688	5.48615	5.93147	6.31406	6.17621	5.45394	5.70966	5.71928	5.6852	5.84399	5.54296	5.71755	5.7295	5.5982	5.64836	5.53683	5.46485	5.50103	6.2751	6.23514	6.31	5.85927	5.67147	5.66243
CC2G_000799	6.59364	6.59256	6.54518	5.85279	6.48026	6.58488	6.88802	6.89049	6.00869	5.8826	5.88032	5.67464	5.96023	5.81686	5.95043	5.81036	5.86316	5.71256	5.34178	5.20833	5.14013	6.26631	6.33281	6.30806	5.82873	5.94927	5.58537
CC2G_000800	5.65357	6.62583	6.37381	6.31299	6.17257	5.99254	6.58975	6.28735	5.20686	5.33706	5.04597	4.85531	5.17894	5.06738	5.05833	3.85178	3.98992	4.09965	4.91251	4.74614	4.50688	4.79777	4.81393	4.74286	5.03647	4.6654	4.94433
CC2G_000801	8.34433	8.32772	8.25466	6.31299	6.12084	6.13477	6.31995	6.27199	6.67914	6.54404	6.55539	6.5646	6.51763	6.44576	6.52127	7.16728	6.89143	7.18285	7.08967	7.08881	6.95503	7.86552	7.91713	7.83267	7.39667	7.11119	7.18674
CC2G_000802	6.53835	6.83737	6.59333	5.30077	5.14143	5.41142	6.89986	6.82252	5.05919	5.08618	4.98014	5.63526	4.96382	5.25121	5.73482	5.96218	5.67591	5.67376	4.81862	5.4587	4.98419	6.58183	6.68613	6.7326	6.0323	5.63962	5.47796
CC2G_000803	6.58884	6.89308	6.8586	7.84446	8.41271	8.42641	5.56058	5.4709	7.59589	6.89029	7.22612	7.31504	6.91097	7.01622	7.25558	7.64936	7.52971	7.30317	6.89351	7.21262	7.29297	8.92188	9.0201	9.05959	11.28	11.0565	11.3533
CC2G_000804	7.71639	8.88836	8.82828	9.66079	9.82341	10.3917	5.82349	5.5697	8.52507	6.43359	6.52236	6.41936	6.94801	6.84873	6.93397	7.38894	7.09711	6.97448	6.8805	6.68872	6.45562	7.60293	7.67142	7.465	9.21927	9.1382	9.423
CC2G_000805	7.6013	7.56561	7.68804	7.12555	7.21281	7.88975	7.09957	7.29794	6.94287	6.32932	6.6478	6.63526	6.71134	6.45717	6.87003	7.04191	6.9168	6.90514	6.50623	6.56263	6.40095	7.03489	7.10989	7.14152	7.43941	7.5281	7.40168
CC2G_000806	5.26218	5.58828	5.41542	4.87754	5.06137	4.97018	5.36377	5.41044	5.36113	5.50189	5.47917	5.52597	5.65777	5.55717	5.97442	5.64854	5.71062	5.76372	5.76005	5.6983	5.61691	5.07949	5.06938	5.0934	3.83541	3.72668	3.95318
CC2G_000807	5.02726	5.85194	5.56779	2.58761	2.99751	2.1038	4.30056	3.97509	3.6602	3.52276	3.4506	3.46802	3.23973	3.16341	3.19864	3.1304	3.0902	3.22504	3.75624	3.39354	3.86567	3.80083	3.69897	3.81503	4.31095	4.11141	4.47753
CC2G_000808	6.13999	7.30752	7.29257	5.10462	5.78094	4.80977	8.1704	8.10331	4.56742	5.65793	5.30689	5.36458	5.60279	5.60583	5.48866	5.40247	5.54002	5.4894	5.82639	5.59565	5.59967	3.84282	3.79747	3.84748	6.92346	6.83392	7.07518
CC2G_000809	6.1202	7.27643	7.14208	6.84025	6.61723	6.60457	6.90378	7.05749	5.92584	5.82242	5.94565	5.9948	6.21785	6.25955	6.19807	6.48282	6.31137	6.22639	7.41149	7.27631	7.13327	6.46473	6.55763	6.49976	7.07102	7.03979	7.3217
CC2G_000810	5.28211	5.17198	5.15164	6.01062	6.81735	7.17144	7.37873	7.35592	6.28617	6.18635	6.04797	5.78017	6.35289	6.28965	6.31647	5.56777	5.16205	5.35063	6.19785	5.85776	5.78946	6.51661	6.59492	6.43894	7.72916	7.47003	7.60532
CC2G_000811	6.82865	5.22876	5.39926	5.93386	5.54621	5.59983	6.18454	5.95163	6.69324	6.29064	6.57369	6.71641	6.44133	6.44957	6.52218	7.17657	7.09963	7.12361	7.28554	7.16311	6.96313	7.25746	7.31139	7.31883	6.04786	6.37731	6.12511
CC2G_000812	5.7512	5.29525	5.45244	8.49902	8.86976	9.00442	8.04184	8.19006	8.37387	8.45231	8.50405	8.61723	8.28709	8.25819	8.45269	9.0988	9.17401	9.20535	8.3679	8.55426	8.54533	8.10558	8.11693	8.30655	7.0054	7.26426	7.00522
CC2G_000813	7.00453	6.3093	6.43323	6.68497	6.83351	6.83877	7.11489	7.12404	7.09925	6.99023	6.90266	6.83334	7.0789	7.03093	6.92099	7.42424	7.46629	7.30317	7.02216	7.05663	6.96986	6.36327	6.4548	6.52757	6.43508	6.25463	6.24174
CC2G_000814	5.37414	4.9118	4.82054	5.97275	5.62258	5.58007	7.26433	7.0929	5.38117	5.58308	5.39186	5.23885	5.50358	5.57474	5.51979	5.08487	5.27695	5.40851	5.31839	5.30282	5.3443	5.31295	5.06691	4.9338	5.20448	5.40148	4.95851
CC2G_000815	5.47111	5.80707	5.83939	3.46232	4.9472	4.66722	5.96169	5.76232	3.39045	1.99201	1.9808	1.75521	2.04616	1.50877	1.67322	4.02152	3.95472	3.95179	2.82946	3.38493	2.73388	3.99955	3.91732	3.94068	2.2782	2.08293	2.18469
CC2G_000816	7.75684	8.62661	8.54338	7.55519	7.87089	8.39565	7.7099	7.68423	7.13362	6.61359	6.68959	6.56269	6.99429	6.88931	6.81278	7.45735	7.50483	7.44451	7.13176	7.06406	6.79617	6.52493	6.51755	6.38653	6.66569	6.71811	6.65103
CC2G_000817	5.16246	4.39905	4.55477	5.97275	5.76418	5.45547	6.27217	6.45726	5.8631	6.22378	6.41204	6.37332	6.66335	6.63765	6.52669	6.23753	6.11211	6.12876	6.25946	6.21322	6.10739	7.07382	7.04871	7.08025	5.95429	6.17608	5.95411
CC2G_000818	4.25156	4.46356	4.58366	5.85279	6.18522	5.74885	7.83541	7.69694	5.29928	5.37206	5.16925	5.32687	5.60426	5.70007	5.41264	5.21999	5.31214	5.03752	5.27043	5.15613	5.33808	4.16947	3.85006	3.85814	5.19653	5.13283	5.29273
CC2G_000819	7.79341	7.68314	7.81834	6.99939	7.48756	6.8553	5.89227	5.59954	7.04689	6.43122	6.58931	6.70176	6.36859	6.55952	6.56495	7.65093	7.60685	7.39907	7.28389	7.43702	7.65808	7.26465	7.23545	7.30964	8.13905	8.02088	8.23612
CC2G_000820	3.28643	3.32251	3.30369	5.6276	4.9472	5.08679	5.67982	5.75791	5.45394	5.51537	5.47387	5.55119	5.56846	5.49025	5.6661	5.65168	5.72766	5.83861	5.52573	5.42128	5.43649	5.28928	5.32812	5.07525	5.6037	5.22934	5.23179
CC2G_000821	8.55807	7.6454	7.76678	10.7675	10.779	11.1508	8.85219	9.02527	9.68528	8.63759	8.68291	8.69089	8.65424	8.72381	8.84764	9.88689	9.80101	10.1394	8.77867	8.99977	9.01061	7.67776	7.87158	7.6527	9.61735	9.83724	9.42428
CC2G_000822	4.41936	6.39173	6.47751	5.97275	5.46556	6.39438	6.71565	6.74452	5.90176	5.82422	5.98099	5.8522	5.97397	6.02541	5.7718	5.63909	5.67726	5.44952	5.86065	5.93355	6.10128	7.31613	7.33259	7.414	5.85927	5.90612	5.90128
CC2G_000823	4.76363	4.16048	4.20413	4.87754	4.9472	4.90814	7.01501	7.29033	5.89481	6.43122	6.77115	7.04074	6.34674	6.03813	6.34947	6.64279	6.6181	6.79084	6.50341	6.53175	6.21316	4.80081	4.96198	5.118	4.42423	4.33755	4.03571
CC2G_000824	8.00071	8.31612	8.27842	4.87754	5.2417	5.05851	4.10986	3.83157	4.4957	4.27529	4.49554	4.82381	4.62638	4.53282	5.03824	5.20297	5.21321	4.93623	4.59262	4.94675	4.80332	6.41985	6.50394	6.25964	6.71522	6.85927	6.56873
CC2G_000825	6.50989	6.78784	6.6445	0	3.96417	3.2594	2.38658	2.49389	2.48529	2.35399	2.75071	2.70083	2.93689	2.92129	3.08569	3.31593	3.14588	2.8213	2.74265	2.85915	2.88947	4.13125	4.40519	4.15031	4.97737	4.65964	4.95851
CC2G_000879	2.07168	0.974322	1.37	0	1.18283	0	0.406341	0.732788	1.19762	1.18666	0.86286	1.55489	1.4272	1.84618	1.59284	0.98787	1.10364	1.35544	1.92112	1.9552	1.54744	2.9674	3.17463	3.22112	1.08044	1.21095	1.44492
CC2G_000839	8.84446	8.95671	8.94374	7.37819	7.53279	7.83662	7.01683	7.15953	6.34347	5.45135	5.60097	5.39061	5.73786	5.47537	6.28484	5.51015	5.35665	5.3933	4.88382	4.6878	4.68084	7.35604	7.54021	7.57972	7.34904	7.58621	7.13568
CC2G_000840	6.2269	5.74787	5.84735	6.34299	6.0256	5.74885	7.18107	7.34275	7.01999	6.85627	6.91445	6.9561	6.68928	6.73225	6.84711	6.66859	6.68004	7.17898	6.58587	6.42445	6.44986	7.25469	7.26265	7.19976	5.94482	6.08873	5.51998
CC2G_000841	7.68679	7.57294	7.8943	7.17641	6.95665	7.47941	7.21622	7.31453	7.08405	6.47787	6.57782	6.50229	6.51214	6.55156	6.59707	7.32648	7.31402	7.33336	6.51187	6.29596	6.52846	6.56759	6.53014	6.60633	5.65683	5.7576	5.82081
CC2G_000842	3.74286	3.74206	3.8068	2.94136	3.63598	3.44562	3.40558	3.33634	4.771	4.79707	4.2774	4.29045	4.52105	4.80104	4.43079	4.22907	4.65398	4.38748	4.39534	4.18615	4.3217	3.87787	3.97634	3.53188	2.47511	2.21451	2.30789
CC2G_000843	4.27562	4.54531	4.44359	4.50553	3.63598	4.28326	6.26303	6.25958	4.03382	4.34238	4.35255	4.78834	4.98435	4.6829	5.01272	3.72044	4.03696	4.27583	4.21821	4.18119	3.87716	5.44734	5.27782	5.34142	3.13796	3.62391	2.90393
CC2G_000844	2.73552	5.39233	5.06551	8.35925	8.10853	10.1068	2.99899	2.9295	7.95883	2.16164	2.30143	2.22918	2.09731	1.914	2.03951	2.59109	2.36876	2.94118	3.39071	2.47684	2.31107	5.19052	5.40043	5.28922	3.69572	4.39416	3.68423
CC2G_000845	4.62065	4.16048	4.3681	7.46259	7.92844	7.47941	6.71342	6.71528	7.75985	8.17248	7.96753	7.8561	7.70203	8.00287	8.28775	6.2417	6.68676	6.78138	6.51935	6.51802	6.87277	7.59768	7.77591	7.68036	8.13281	8.59722	8.2725
CC2G_000846	7.68229	8.00095	8.08065	7.47619	7.36508	7.72409	7.41768	7.5429	7.44935	7.22645	7.38953	7.38955	7.68646	7.59983	7.7254	7.67079	7.58615	7.59706	7.45602	7.50318	7.40236	8.54414	8.58282	8.54474	7.78525	7.85997	7.66632
CC2G_000847	4.60174	4.35439	4.57409	4.50553	4.41437	4.01549	5.69801	6.00465	5.01498	5.40864	5.42339	5.37548	5.78801	5.65289	5.55026	5.27598	5.35833	5.25292	5.67553	5.37201	5.45577	4.9233	4.72287	4.62923	4.27364	4.14479	4.26589
CC2G_000848	2.39826	2.18183	1.61359	2.94136	0	1.57485	2.1427	2.65416	2.48529	2.25031	2.4814	2.39269	2.55311	2.57537	2.62879	2.38022	2.45946	2.4472	2.89993	2.74262	2.8666	4.26523	3.99202	4.17183	2.57663	3.62391	2.82362
CC2G_000849	5.81826	6.04347	6.03686	4.39534	5.38014	4.87609	7.12333	7.09639	5.14959	5.42302	5.54979	5.28816	6.01335	5.93037	5.89982	5.41915	5.60247	5.42729	5.27264	5.08878	5.06175	5.8339	5.69049	5.80925	6.10844	6.29421	6.34065
CC2G_000850	1.99645	0.974322	0.964086	0	0	1.21373	1.30097	0.994777	1.10425	0.773174	1.13794	1.20971	1.28737	0.943237	1.44804	1.24223	1.3938	1.18929	1.70198	1.72887	1.42755	1.86638	1.79334	2.01502	0.685278	0.490143	0.685209
CC2G_000851	4.58257	4.23628	4.20413	3.66589	3.90423	4.18203	3.49154	3.65333	3.32987	3.4118	3.23338	3.05568	3.61802	3.43365	3.71767	3.41531	3.4912	3.55388	3.76885	3.53262	3.4776	4.11175	3.89525	4.07007	2.99858	2.94029	2.90393
CC2G_000852	8.47564	7.86527	7.87884	6.94175	7.34831	6.95071	7.35885	7.3919	5.8197	5.94537	5.91205	5.95465	5.90388	6.31286	6.41132	5.73394	5.56357	5.25081	5.6017	6.04025	5.82549	5.66862	5.96934	5.88547	5.97767	6.08013	5.76545
CC2G_000853	6.49801	4.3083	4.34578	4.95727	5.19243	4.7042	4.92024	4.60467	5.75973	5.56591	5.81609	6.00607	6.05059	5.95606	5.82262	5.63909	5.47006	5.13673	6.1114	6.34452	6.23453	6.31826	6.13627	6.36334	6.92587	6.9993	7.18373
CC2G_000854	8.75956	8.58191	8.60045	8.30695	8.34387	8.53815	9.71369	9.76516	7.78733	8.03338	7.92961	7.92897	7.86124	7.81796	8.14824	8.11215	8.44209	8.64941	7.39023	7.3567	7.267	8.01305	8.10586	8.03526	6.57659	6.92199	6.4961
CC2G_000855	8.99397	8.62661	8.58386	8.32208	8.73862	8.80608	6.9077	6.94575	8.11433	7.2414	7.51794	7.75576	7.70065	7.892	7.57877	9.79956	9.65102	9.18328	9.24514	9.28502	9.29277	7.26189	7.22166	7.24411	7.5667	7.65949	7.85113
CC2G_000856	5.73393	5.73921	6.07127	6.68497	6.92684	6.79658	6.47308	6.5945	6.40104	6.53745	6.34969	6.4109	6.29199	6.49087	6.37673	6.8024	6.72447	6.61355	6.34719	6.53467	6.56088	7.15702	7.10509	7.0602	7.7659	7.87621	7.80285
CC2G_000857	6.71885	6.52616	6.58144	6.11861	6.12084	6.68076	8.02482	8.20308	6.39119	5.97494	6.15017	5.84907	6.20236	5.91666	6.24156	6.34904	6.404	6.60862	5.85475	5.59938	5.78184	5.87929	5.95207	6.01493	4.59123	5.1161	5.04518
CC2G_000858	6.38826	6.86549	6.88786	4.14595	4.88654	4.12863	4.41498	4.62416	4.54982	4.04061	4.36024	4.39704	4.47345	4.51109	4.54557	5.32202	5.05808	4.76662	4.67195	4.90218	4.72284	4.78552	4.84881	4.73709	3.46365	3.30755	2.90393
CC2G_000859	6.58564	6.39724	6.38206	5.97275	6.25885	6.37157	6.13531	6.04135	5.8808	5.56591	5.6691	5.617	5.52709	5.31948	5.44735	6.15478	5.86079	5.84001	5.57323	5.75622	5.67236	6.32886	6.29643	6.24855	6.6307	6.7264	6.62905
CC2G_000860	5.61323	5.22876	5.00983	7.09061	7.29679	6.99615	6.42746	6.53654	6.4493	6.27488	6.1798	6.6124	6.29838	6.77771	6.47063	7.89029	7.69482	7.56264	6.91493	7.17814	7.31161	5.8648	5.82355	5.97264	4.69082	4.86887	4.76241
CC2G_000861	6.0264	4.60372	4.35699	5.30077	4.7227	5.53972	4.2886	4.3476	6.84164	6.74909	6.93583	7.04621	6.47556	6.50925	6.30601	7.05085	7.01832	7.00919	6.69724	6.68697	6.65815	4.91488	4.80508	4.79371	6.05227	5.37711	5.68818
CC2G_000862	3.68414	4.39905	5.42076	2.11792	3.21045	3.04553	5.57049	5.25659	4.00828	4.2324	4.46734	4.15018	4.24682	4.65675	4.31863	4.11999	3.80958	3.38734	4.62071	4.04567	4.74495	5.62803	5.73	5.46684	5.78167	5.99346	5.2815
CC2G_000863	2.03456	3.65267	3.65173	2.58761	4.49785	4.28326	3.57268	3.86472	4.38096	4.34238	4.26107	3.97771	4.41417	4.43619	4.32694	3.94171	3.87223	3.54703	3.43093	3.2586	3.64151	5.24746	5.02432	4.92622	5.51057	5.56453	5.34761
CC2G_000864	5.08287	4.56504	4.65799	5.52667	5.46556	6.67145	6.8458	6.63109	5.70513	5.46531	5.30888	5.10373	5.42568	5.51047	5.55557	5.04246	5.3465	5.09505	5.10875	5.21321	4.90222	6.4009	6.41946	6.19491	6.64538	6.55076	6.4961
CC2G_000865	7.57811	7.70997	7.71875	4.70349	5.7127	5.67626	5.65675	5.93612	5.57197	5.068	5.09977	5.0932	5.1038	4.94035	5.41069	5.76326	5.58099	5.7652	5.16945	5.12026	5.11124	5.83836	5.71433	5.74035	5.48794	5.47877	5.68818
CC2G_000866	5.42881	5.51408	5.61053	6.25106	5.81389	5.67626	7.88985	7.84652	4.83779	5.14229	4.81933	4.47617	4.68049	5.06986	4.90864	4.33829	4.91889	4.80447	4.47828	4.3322	4.61718	5.44928	5.43909	5.54642	6.50596	6.53354	6.55791
CC2G_000867	7.7547	6.37506	6.50042	6.25106	6.10762	5.59983	7.25514	7.24069	7.32812	6.6031	7.07314	7.20747	7.07359	6.91021	7.36045	7.54899	7.57569	7.6452	6.85707	7.0327	6.71126	7.13967	7.18744	7.19662	5.49444	5.72486	5.79471
CC2G_000868	5.82914	6.40548	6.24711	5.30077	5.52646	5.56003	7.36171	7.26883	4.62738	5.46762	5.16706	5.22926	5.44226	5.52861	5.53779	4.01666	4.22229	4.13208	5.14789	5.00694	5.18935	5.50825	5.59956	5.38997	4.49077	4.78667	4.13889
CC2G_000869	5.81279	5.97873	5.83138	4.95727	5.16715	5.24573	6.29326	5.96316	4.79361	5.40623	5.34807	5.06384	5.14084	5.05742	5.05833	4.92285	4.70519	4.83011	5.30763	5.02645	5.00004	5.02581	5.05949	5.09566	6.87072	6.66589	6.85294
CC2G_000870	5.51893	5.75218	5.73164	6.7082	6.75085	7.32771	7.77883	7.80015	6.14971	6.34702	6.09825	5.98629	6.22649	6.44385	6.11417	5.7705	5.78641	5.58117	6.21983	6.04573	6.0194	5.60381	5.61821	5.53816	6.29502	6.07364	6.10402
CC2G_000871	3.3633	2.89364	2.5246	6.66135	6.8653	7.51627	5.40866	5.57472	7.85517	7.29904	7.2563	7.32463	6.4314	6.40706	5.87879	8.72407	8.76287	9.09439	8.08971	8.29855	8.33311	4.53778	4.25294	4.54928	5.02753	4.90828	5.25495
CC2G_000872	0.971684	0.974322	0.561119	0	2.26623	2.65018	1.3932	1.31566	1.89954	1.18666	1.02641	0.907104	1.88084	1.67434	1.53665	1.20852	1.13543	0.960797	1.27694	0.858588	1.33061	1.30457	1.21358	1.43707	0.591369	0.490143	0.490867
CC2G_000873	8.74742	9.65704	9.57989	8.99563	8.50639	9.12694	10.8138	10.6466	7.50976	7.76135	7.51965	7.4913	8.20008	8.23159	7.86635	7.33822	7.51996	7.12015	8.08814	7.95881	7.93106	7.61336	7.75729	7.46282	7.42842	7.59454	7.0892
CC2G_000874	5.5122	6.92778	6.83477	4.95727	5.52646	5.65753	5.10886	5.25659	4.88767	4.37725	4.2024	4.61515	4.36284	4.39328	4.21503	5.36854	5.23905	5.03507	5.00067	5.23014	5.09657	4.89506	4.87724	4.65391	4.30356	4.75459	4.36853
CC2G_000875	7.87049	7.33076	7.50759	6.0835	5.95351	6.41683	7.22409	7.38334	5.89481	5.76902	5.9971	5.85376	6.06779	5.9056	6.10815	6.33349	6.24644	6.09861	5.91979	5.80707	5.68222	6.04006	6.14331	6.16839	5.75755	5.89636	6.05649
CC2G_000876	6.96808	6.68338	6.50042	6.79756	6.79277	6.5033	5.32916	5.35319	6.20135	6.31782	6.48681	6.29966	6.39268	6.45812	6.3279	6.49598	6.40725	6.26554	6.48442	6.52686	6.75395	5.0232	5.09139	5.08889	5.74124	5.84397	5.65954
CC2G_000877	4.48962	4.92713	5.11912	5.23831	5.65931	5.00023	5.62381	5.53408	4.94265	5.67404	5.36727	5.34474	5.13269	5.23362	5.24085	4.43619	4.82699	4.76071	4.92101	5.10722	5.0338	5.16945	5.27141	5.03354	4.38978	4.44864	4.41723
CC2G_000878	1.43759	1.70089	1.75577	4.87754	4.27933	4.42291	0.982555	0.994777	3.77068	5.13065	4.98761	4.68343	4.64655	4.55068	4.6386	2.71628	3.0902	3.30847	2.44563	2.60104	2.4093	2.12162	1.9299	2.01502	0.685278	0.855326	0.773369
CC2G_000880	6.07292	6.52867	6.41994	5.23831	5.31258	5.69475	7.08755	7.04128	5.51869	5.85988	5.68296	5.42461	5.42401	5.57124	5.68076	5.07789	5.13085	5.51069	5.44751	5.31193	5.39313	5.9372	5.921	5.89326	6.62331	6.46251	6.83
CC2G_000881	5.01302	5.61692	5.76986	4.70349	3.63598	4.42291	3.99682	3.83157	4.56742	4.45859	4.43494	4.09319	4.17324	4.03053	3.98243	4.44345	4.40942	4.53335	3.72423	3.61595	3.59356	4.32147	4.42459	4.43647	4.24309	4.02441	3.99961
CC2G_000882	5.07832	5.09263	5.18345	5.41814	5.40197	5.43361	5.20742	5.64319	5.7975	5.71746	5.7474	5.66401	5.62329	5.6446	5.671	5.96345	6.01826	6.28833	5.78199	5.65775	5.78032	6.20323	6.23843	6.28652	6.51877	6.37731	6.30596
CC2G_000883	8.36457	8.18676	8.24866	7.63008	7.79865	7.97166	7.70765	7.93404	7.86054	7.36009	7.44706	7.39223	7.47712	7.45227	7.8412	7.68311	7.65047	7.81922	7.34516	7.43075	7.29458	6.7489	6.79371	6.914	7.90231	7.88858	7.82494
CC2G_000884	6.98399	7.47855	7.24061	7.8019	7.21281	7.683	10.2812	10.1488	6.59155	6.99985	6.69188	6.57977	7.04347	7.10715	6.94683	5.82989	6.10911	5.73987	6.55163	6.28905	6.18107	6.59856	6.4902	6.43361	5.89656	5.93503	5.81822
CC2G_000885	3.51924	3.57694	3.47796	5.6276	6.32892	6.41683	5.00307	4.9595	6.36124	5.76149	6.0971	6.02559	5.71893	5.71441	5.8517	5.31807	5.14848	5.27798	5.39562	5.46075	5.38913	5.98888	5.76694	5.75326	2.98017	3.36533	2.71649
CC2G_000886	1.04818	0.567895	0.561119	3.46232	2.26623	2.1038	5.24503	5.26282	3.80075	4.45859	4.62562	4.81422	4.85658	4.54713	5.07075	2.96867	3.40254	3.48382	4.32024	4.00689	4.06467	4.67694	4.41686	4.71967	4.188	3.71562	4.00872
CC2G_000887	7.15048	7.51197	7.26905	5.23831	5.7127	5.56003	6.45447	6.39622	5.71306	5.99913	5.99833	6.02282	6.18276	5.94665	6.14503	6.1614	6.00757	5.99412	6.14805	5.97288	6.01551	6.29792	6.32044	6.18647	6.53935	6.49846	6.47817
CC2G_000888	5.90052	4.1343	4.10132	5.03282	5.7127	5.05851	6.45714	6.35014	4.66873	4.9604	5.16925	4.86153	4.89803	4.57881	5.07322	4.46858	3.98992	4.30049	3.88921	3.83415	3.79475	4.04651	4.33723	4.38949	3.2187	3.21629	2.84412
CC2G_000889	4.87282	5.2472	5.18973	6.5881	6.53069	6.40565	7.72439	7.51837	5.42043	5.99753	5.65354	5.55504	5.5146	5.70964	5.55026	4.7608	4.89356	4.73681	5.33119	5.27744	5.3505	5.80991	5.74705	5.61557	6.67859	6.7858	6.68268
CC2G_000890	7.13302	6.69014	6.80645	6.40117	6.55037	6.1616	6.14529	6.21207	6.09616	6.04323	6.19815	6.1578	6.38841	6.19287	6.22943	6.82204	6.6665	6.71183	6.34929	6.28442	6.28715	6.77547	6.82616	6.92037	7.98484	8.18781	7.9425
CC2G_000891	4.9645	3.01339	2.93655	4.00298	3.30619	3.44562	4.6667	4.85614	6.3203	6.86067	7.08769	7.44702	7.01549	7.0877	7.4291	7.88563	7.78369	8.16786	7.6233	7.97397	8.20592	8.79985	8.92593	8.88788	8.91845	9.17426	8.95231
CC2G_000892	4.02425	5.32449	5.05867	5.76688	5.89312	5.49821	5.89622	5.73568	5.07773	5.56591	5.47917	5.60778	5.51773	5.88039	5.56438	5.04962	5.21507	5.00036	5.70535	5.70003	5.81657	5.00747	4.97782	4.92622	5.6655	5.5207	5.52316
CC2G_000893	6.09562	6.13543	6.46722	6.34299	6.71641	6.83043	5.43602	5.37061	5.74046	5.22393	5.2808	5.33584	5.65066	5.82275	5.59222	6.2858	6.0582	5.98781	5.87385	5.98433	5.92708	5.93997	5.93459	5.96896	7.87018	7.63106	7.92336
CC2G_000894	7.33547	7.75362	7.90388	7.25739	7.11705	7.19761	8.11392	8.04757	6.12912	5.84928	5.62191	5.76034	6.09111	5.91252	5.98889	6.40032	6.1161	5.98401	5.76163	5.8119	5.64742	6.45219	6.58288	6.23123	5.8668	5.95163	5.79208
CC2G_000895	5.12321	4.91949	4.98116	5.17301	5.78094	5.59983	6.47044	6.52881	5.55443	5.53536	5.67989	5.6425	5.57449	5.76425	5.73013	5.86412	5.89833	5.73536	5.45143	5.49518	5.5503	6.64761	6.61278	6.71292	6.75502	6.55231	6.13138
CC2G_000896	7.67628	8.75458	8.69781	7.87558	8.03708	7.60204	8.99287	8.77419	6.53453	6.6659	6.31549	6.7973	6.61078	6.86167	6.36468	7.24414	7.27977	6.97193	6.81514	6.89085	7.10851	5.99952	5.99292	5.91639	6.90406	6.76984	7.07409
CC2G_000897	8.67727	8.8426	8.8999	7.84446	7.57184	7.54713	8.18418	8.06995	6.54345	6.32039	6.36218	6.39491	6.24551	6.55687	6.03779	7.06033	6.9378	6.69565	6.48059	6.63524	6.69837	6.41886	6.3287	6.37545	6.39395	6.35964	6.54231
CC2G_000898	7.34308	7.42015	7.44073	6.99939	6.94182	6.89582	6.89592	6.84553	5.84156	5.77089	5.43618	5.40133	5.89065	6.03305	5.78543	5.30816	5.38005	5.25502	5.99684	5.67375	5.64238	6.22267	6.32767	6.12382	7.09901	7.10378	7.28655
CC2G_000899	0.971684	1.70089	1.18127	3.84426	4.32576	3.82717	4.41498	4.03456	5.294	5.56375	5.53797	5.57409	5.37649	5.55717	5.39892	5.60063	5.65276	5.51245	5.52015	5.63432	5.90059	5.50078	5.46928	5.47378	3.83541	4.44864	3.89542
CC2G_000900	8.50985	8.44684	8.59691	8.04025	8.33539	8.17303	6.49406	6.28429	7.43504	6.28147	6.51377	7.24244	6.63623	6.86952	6.50031	8.33155	8.16175	7.90817	7.32929	7.88323	7.78586	6.92259	7.09786	7.00972	8.76997	8.87997	9.09011
CC2G_000901	5.92608	6.04347	6.04727	5.23831	5.67733	4.74026	7.58101	7.63944	6.62555	6.72511	6.97266	7.0428	6.97959	6.9955	7.35691	6.53389	6.69278	7.0904	6.15647	6.15235	5.89071	7.30437	7.42215	7.43105	5.62756	5.78697	5.53582
CC2G_000902	7.5339	6.8535	6.95204	6.28236	5.81389	6.18795	7.25821	7.35154	6.07478	5.98143	5.99216	5.99339	6.41805	6.25738	6.34845	6.47043	6.5438	6.72023	6.50623	6.30054	6.17061	5.63658	5.37473	5.64664	5.13545	5.44567	5.15182
CC2G_000903	6.03817	5.06518	4.9145	4.95727	4.02171	4.59029	4.75626	4.42742	4.57614	5.14229	4.88742	5.0421	4.77253	5.09929	5.02808	5.15069	5.18311	5.27175	6.16723	6.33449	6.05144	4.98085	5.10588	4.95629	3.97211	4.301	4.53541
CC2G_000904	5.71646	5.31286	5.45765	9.68733	9.89156	10.3258	10.3553	10.5005	9.27359	10.417	10.3529	10.5179	10.0279	10.1035	10.2186	10.7085	10.6684	10.8803	10.2475	10.4196	10.3919	9.68725	9.77513	9.78029	7.51967	7.74564	7.31437
CC2G_000905	1.95731	1.29106	1.45585	3.84426	4.7227	5.29505	4.6667	4.62416	4.11983	4.11923	4.2774	4.48022	3.97783	4.19402	4.20605	4.93836	4.78501	5.03996	4.28556	4.18615	4.07966	3.70651	3.82692	3.74785	2.2782	2.11697	1.90138
CC2G_000906	6.64995	6.77731	6.84076	5.97275	5.54621	6.22659	6.43832	6.31159	5.51869	5.52873	5.42705	5.36019	5.20249	5.5123	5.47751	5.69035	5.68802	5.83721	5.31839	5.52685	5.35256	6.35914	6.56988	6.44603	7.87018	7.8205	7.86562
CC2G_000907	7.74683	7.76006	7.90005	6.40117	6.28259	6.25179	7.7767	7.80336	5.58931	5.95529	5.70426	5.47618	5.89547	6.04571	6.04913	5.86682	6.32349	6.18504	5.45533	5.60681	5.57343	7.18702	7.36307	7.22982	12.4875	12.4217	12.5024
CC2G_000908	3.86419	4.21146	3.6698	4.39534	5.19243	5.477	4.93566	4.5343	5.40093	4.8897	4.97264	5.11419	5.55175	5.32364	5.38705	6.54406	6.12008	5.63064	5.6502	5.83422	5.9422	4.83093	4.93248	4.77414	3.47684	3.8329	3.23416
CC2G_000909	1.95731	1.77053	1.45585	4.39534	3.56033	3.35552	4.26438	4.03456	3.64371	3.80479	3.86685	4.06113	4.2581	4.35313	4.3798	4.7981	4.44791	4.17272	4.64485	4.6878	4.55058	5.17651	5.19892	4.96371	4.74634	4.23279	4.29597
CC2G_000910	1.31909	0.567895	0	0	0	0	1.47988	1.57799	0.897165	1.39548	1.33807	0.755073	1.2274	0.807195	1.38578	0.819467	0.780815	0.831372	1.24119	1.2862	1.11467	2.26971	2.54044	2.36808	1.82105	1.27265	1.33333
CC2G_000916	0.400949	0.215102	0.397192	2.11792	0.709386	1.21373	0.982555	0.869721	0.364536	0.191317	0.0766631	0.0874897	0.0699543	0.157503	0.230002	0.0767305	0.0674644	0.0781586	0.0831136	0.248141	0.081711	0.0824353	0.156663	0.146306	0.139254	0.139006	0.266211
CC2G_000917	3.13682	2.82982	2.67537	4.79314	4.75699	4.55023	4.95848	5.03425	4.66055	4.7897	4.63832	4.61146	4.57618	4.6064	4.7693	4.45427	4.59804	4.73681	4.47828	4.43592	4.42706	5.25636	5.17393	5.32998	5.96836	6.18212	6.00734
CC2G_000918	6.46001	5.9071	6.04727	6.99939	6.94925	7.15149	6.2752	6.16294	7.0023	6.22925	6.24458	6.43404	6.23032	6.11937	6.23274	7.02688	7.03895	7.63554	6.64092	6.88551	6.89059	5.84132	5.85534	6.05601	6.16658	6.4341	5.97285
CC2G_000919	7.3638	7.74608	7.88562	8.89799	9.40519	9.47868	8.77501	8.90743	7.88179	7.40966	7.20813	7.2093	7.25815	7.45464	7.31524	8.59041	8.50123	8.40762	7.58727	7.71258	7.80516	6.88575	6.87138	6.9191	5.78962	6.07364	5.89146
CC2G_000920	1.64885	2.50152	1.61359	3.84426	2.44513	2.49	4.09621	3.18708	3.26664	3.79008	3.64565	4.11417	4.02702	3.89726	3.97187	3.292	2.94529	3.19026	3.89497	3.87163	3.95511	1.55607	1.44392	1.34915	1.33344	0.590463	0.490867
CC2G_000921	7.4332	6.50333	6.57905	5.03282	5.19243	4.90814	5.30562	5.40482	5.27271	4.54438	4.96762	4.76531	5.11004	5.05241	4.94147	5.86277	5.8596	5.51245	5.51268	5.59752	5.58574	6.30759	6.20181	6.29929	6.44853	6.27926	6.52654
CC2G_000922	7.9474	9.60407	9.43383	7.95542	8.1446	7.72409	8.23102	7.92818	6.65259	6.8483	6.49469	6.56174	6.79376	7.02456	6.7829	6.98208	7.08037	6.73764	7.07261	7.12934	6.98121	7.31879	7.42456	7.25323	8.00945	7.80427	8.03457
CC2G_000923	4.92447	5.87188	5.79478	6.25106	6.30594	5.96233	7.62922	7.35008	5.59789	6.19196	5.86419	5.71125	5.99211	6.06944	6.03779	5.65325	5.71194	5.51421	5.69878	5.62338	5.67236	6.23399	6.29538	6.1381	6.84297	6.96817	6.79225
CC2G_000924	9.51062	9.3647	9.35677	8.65062	8.63411	8.80608	9.27935	9.32643	8.18087	8.24541	8.1582	8.10669	8.13858	8.26091	8.25466	8.56192	8.615	8.5522	8.02286	8.14346	8.16022	7.93685	8.00286	7.99689	7.49557	7.5066	7.56498
CC2G_000925	6.7762	6.8231	6.7838	7.85491	7.93219	7.72409	10.3454	10.0744	6.79944	7.32032	7.17364	7.1785	7.43756	7.6071	7.56259	7.17983	7.23554	7.23496	7.15596	7.02718	6.88064	7.79508	7.80617	7.6717	6.84297	7.08025	6.47817
CC2G_000926	4.54347	4.23628	4.40094	3.84426	3.70786	3.2594	6.41926	6.40187	4.09577	4.68224	4.56371	4.41406	4.66645	5.13997	4.82608	4.59462	4.81722	4.76957	5.0428	4.70866	4.82721	4.91207	4.98828	4.99302	4.67373	4.6654	4.7838
CC2G_000927	7.67251	7.90549	7.96371	9.82122	10.076	10.1282	10.5848	10.5545	8.90536	9.82562	9.40541	9.32407	9.29417	9.87198	9.54689	9.80398	10.0529	9.69548	9.51432	9.47226	9.63114	7.74771	7.82527	7.64963	11.7656	11.6772	11.9013
CC2G_000928	8.26691	8.5339	8.55923	5.57802	5.81389	5.96233	6.22589	6.18279	6.08704	6.3114	6.27641	6.26255	6.16489	6.18603	6.04031	6.23439	6.12206	6.0594	6.04298	5.92466	5.98265	6.20553	6.40489	6.24956	7.36331	7.44596	7.46676
CC2G_000929	0.971684	0.974322	0	0	0	0	1.30097	1.57799	0.781292	1.47122	1.51379	1.90723	0.883322	1.10671	0.656378	1.56877	1.44543	2.80989	2.75537	3.23003	3.10021	2.86632	3.34717	3.17923	1.54862	1.38865	1.5485
CC2G_000930	2.95008	3.06973	2.63913	2.11792	0	0	1.97375	2.21418	1.84286	1.96606	2.64138	2.97768	1.60266	1.75051	1.74936	2.38022	2.25761	3.60758	3.70468	3.932	3.77646	4.00484	4.37759	4.34851	3.52843	3.06758	3.06979
CC2G_000931	8.92781	7.36493	7.33991	6.34299	6.48026	6.67145	8.83739	8.78018	6.46581	5.97005	6.14796	5.92971	6.29838	6.30657	6.44796	6.12799	6.36598	6.48585	5.52202	5.28209	5.29162	5.74969	6.09086	5.78851	6.17672	6.27361	5.97285
CC2G_000932	7.02361	5.99337	5.63834	5.57802	4.68758	5.19467	7.30496	7.53905	4.91542	4.62121	4.52661	4.205	4.84913	4.63682	5.01529	4.27457	4.55462	4.36817	3.78135	3.77604	3.77031	3.9889	4.13545	3.9	4.3256	4.40798	4.53541
CC2G_000933	4.91939	3.0971	3.2325	3.22523	3.8417	3.95541	5.40866	5.13279	4.52301	4.34238	4.34869	4.26722	4.45723	4.01517	4.52405	4.65529	4.78752	4.83575	3.71123	3.80861	3.75794	4.90359	4.90512	5.118	3.83541	4.41483	3.7831
CC2G_000934	7.77595	7.27942	7.30419	9.28549	9.47895	9.94241	8.45952	8.55752	8.82076	8.08327	8.04112	8.04826	8.04778	8.03591	8.25657	8.8077	8.85897	9.16647	7.84378	8.01502	8.00884	8.18731	8.24709	8.07062	7.65421	7.6902	7.42653
CC2G_000935	6.48946	6.66064	6.79002	6.68497	6.53069	7.00359	6.08089	6.17621	7.04218	6.75667	6.91771	6.8685	6.92637	6.75939	6.96557	6.98705	6.93441	7.06003	6.79756	6.72415	6.98055	7.04905	7.15355	7.22314	7.85826	7.96999	7.83201
CC2G_000936	2.98941	3.36815	3.57707	2.11792	2.44513	2.1038	2.70718	3.10622	2.32899	2.37386	2.65395	2.87076	2.46498	2.51842	2.86388	1.92063	2.32808	2.47636	2.94506	2.47684	2.42504	4.08201	3.84431	3.84212	1.86184	3.24736	2.15217
CC2G_000937	4.95955	4.35439	4.47477	4.95727	5.5849	5.61932	5.39756	5.71311	5.83067	5.71162	5.93153	6.04211	5.90866	5.79155	6.15323	5.92115	5.81858	5.81883	5.80971	5.72072	5.7321	7.58094	7.6596	7.71631	7.91751	7.80427	7.40082
CC2G_000938	4.01475	4.46356	4.58366	4.87754	5.60387	5.65753	2.63346	2.76366	5.18991	3.97056	3.9405	4.05571	4.06177	4.04572	4.20154	4.72251	4.8889	4.80735	4.04763	4.08874	4.18047	4.60904	4.50695	4.51938	5.59163	5.38411	5.58537
CC2G_000939	6.23305	5.99701	5.89807	5.81047	5.60387	5.99254	5.87638	5.78846	6.18149	6.31654	6.27946	6.22686	6.21496	6.12296	6.08508	6.66704	6.75804	6.78357	6.22441	6.25163	6.39697	6.18818	6.03517	6.15441	5.39719	5.54591	5.60352
CC2G_000940	2.96988	3.43402	2.96611	0	1.82392	0	2.77732	2.89782	3.3091	3.76773	4.04912	4.15525	3.7464	3.37871	3.77343	2.8858	3.04907	3.17256	3.39884	3.37626	3.35149	5.08949	4.8716	4.94634	2.01438	1.89954	1.59763
CC2G_000941	6.76774	6.55851	6.58144	9.61235	9.90404	10.2426	7.79583	7.79908	8.74931	8.30549	8.38451	8.26431	8.42799	8.59589	8.33588	8.32124	8.36647	8.36782	7.3619	7.56645	7.63458	7.70972	7.63608	7.75389	6.4283	6.60573	6.72751
CC2G_000942	7.73387	7.1917	7.19609	7.87558	7.60045	8.00538	10.1047	10.0792	7.14978	7.7323	7.51363	7.38632	7.51052	7.54028	7.42862	7.26735	7.57279	7.46602	6.93255	6.71042	6.6829	6.50452	6.43772	6.54334	6.38173	6.33996	6.50739
CC2G_000943	6.3108	6.1841	6.10487	4.60791	5.44467	4.90814	6.72677	6.44909	4.90854	5.78023	5.48973	5.37766	5.33979	5.40641	5.35288	4.59787	4.82211	4.87185	5.82488	5.6105	5.66741	4.93721	4.60541	4.62612	2.88443	2.77957	3.0166
CC2G_000944	4.46192	5.19749	4.81242	4.14595	4.45671	4.55023	6.17807	6.00092	4.31997	4.77483	4.75372	4.69393	4.76464	4.85091	5.01014	3.52206	3.53952	3.79283	4.47828	4.37198	3.89422	5.46281	5.35465	5.34711	3.79385	4.45531	3.77245
CC2G_000945	4.84092	5.70404	5.64292	4.27603	5.28934	5.22043	6.72234	6.5721	4.88065	5.48828	5.11576	5.15273	5.38165	5.4413	5.29478	5.00368	4.99451	4.97249	5.49381	5.14597	4.91343	4.84576	4.86025	4.84014	5.54855	5.50472	5.44478
CC2G_000946	7.8914	7.27942	7.45253	6.88171	6.87313	7.26722	6.77042	6.74006	7.03745	6.51972	6.81866	6.75617	6.62465	6.83641	6.84278	7.275	7.36058	7.21564	6.8754	6.98077	6.97254	7.21641	7.2211	7.27427	7.34004	7.74904	7.49377
CC2G_000947	1.04818	2.23207	2.63913	4.14595	5.31258	3.82717	2.43077	2.69159	4.79361	6.36202	6.18089	6.61055	6.08795	6.6098	6.90582	3.61504	3.11432	3.07109	5.42578	5.28441	6.01421	7.19688	7.2648	7.12672	9.06922	9.24017	9.25661
CC2G_000948	2.4272	4.1734	4.08794	3.46232	4.37075	4.23354	2.24525	2.61573	4.00828	3.53163	3.69512	3.72152	3.97327	4.09037	4.00331	3.83531	3.59201	3.88268	2.97801	3.36754	3.31816	3.55595	3.80341	3.83675	3.57824	3.99726	3.89542
CC2G_000949	4.21054	3.82624	3.70529	6.45709	6.87313	7.22967	4.42594	4.27548	6.66491	5.61265	5.43436	5.40984	5.17497	5.31531	5.42624	6.42896	6.53861	6.8815	5.33544	5.68432	5.73684	5.39789	5.18079	5.3973	3.64987	4.08585	3.85558
CC2G_000950	5.45364	6.06095	6.19189	4.70349	5.26571	4.93949	3.96711	3.97509	5.18422	4.86534	4.87942	4.6764	4.87379	4.92673	4.74161	5.581	5.57666	5.45319	5.29243	5.33894	5.55567	4.38781	4.23548	4.18881	4.67373	4.73281	4.78909
CC2G_000951	3.77697	4.75742	4.75431	5.97275	5.11523	5.08679	6.18131	5.98217	4.79361	5.48143	5.20598	5.38199	5.25973	5.3174	5.14075	5.09874	5.107	5.19051	5.23452	5.10984	5.34223	5.65184	5.65972	5.52651	3.75106	4.25589	3.63801
CC2G_000952	7.32301	7.18375	7.31141	7.34893	7.13672	7.58232	7.40528	7.27808	7.04689	7.19398	7.34179	7.26607	7.09262	7.18698	7.32823	6.83797	6.8381	6.89168	6.82498	6.92393	6.96851	7.15046	7.24857	7.07627	7.17584	7.2384	7.03895
CC2G_000953	4.67594	4.62267	4.77951	7.6422	7.76955	7.90572	8.20819	8.27034	7.02636	7.38172	7.32126	7.10046	7.19302	7.30639	7.75379	5.71006	5.78766	5.95193	5.43372	5.29594	5.20766	7.45654	7.68515	7.46282	7.17988	7.26046	6.99608
CC2G_000954	4.36057	4.53534	4.41172	5.17301	5.42348	4.50903	5.72044	5.6384	4.25629	4.40649	4.33705	4.7818	4.66362	5.04235	4.58419	5.0591	4.74436	4.52988	5.01925	5.26811	4.98153	5.41788	5.57374	5.46335	6.36586	6.73738	6.23593
CC2G_000955	5.43239	4.39905	4.3681	7.51623	7.73986	8.20886	7.1115	7.34275	7.12474	6.32677	6.30557	6.21355	6.2782	6.33365	6.62933	6.45345	6.56438	6.8024	5.21622	5.56547	5.78794	5.98486	6.08356	6.1748	5.73851	5.55835	5.5975
CC2G_000956	3.96629	3.80979	4.0191	4.70349	4.32576	4.37785	4.43682	4.25061	4.20099	4.49986	4.45303	4.5396	4.25435	4.42074	4.52405	4.39183	4.41267	4.19482	4.5199	4.57494	4.46942	3.86045	4.10692	4.1152	4.58515	4.75999	4.67927
CC2G_000957	4.04307	4.26069	4.49519	5.52667	5.79751	5.22043	7.15167	6.80341	5.13786	5.6498	5.38622	5.44339	5.32019	5.38267	5.59566	5.43015	5.47938	5.63872	5.75372	5.73434	5.53406	5.91909	5.86105	5.82835	8.34775	8.46265	8.31121
CC2G_000958	9.92996	10.2243	10.3123	10.2882	10.3858	10.801	8.15567	8.13932	9.18052	8.44792	8.27515	8.44469	8.26955	8.5411	8.02186	9.43054	9.12439	8.89794	8.36531	8.26462	8.6203	8.32859	8.2671	8.15759	8.84723	8.66386	9.00305
CC2G_000959	4.32258	5.54918	5.04488	5.23831	4.45671	4.74026	5.52024	5.34147	4.29905	4.53999	4.3564	4.50426	4.6118	4.40511	4.52044	3.94171	4.08659	3.70933	4.14272	4.07809	3.91108	4.63317	4.4361	4.5818	2.71665	3.13557	3.15432
CC2G_000960	5.57172	5.84388	5.87877	5.89389	5.08855	5.93147	8.41139	8.47405	5.36113	6.01977	5.5961	5.3336	5.64351	5.88603	5.69847	5.34934	5.81368	5.80021	5.22769	5.0209	5.14251	5.33833	5.11307	5.43338	4.196	4.35904	4.7516
CC2G_000961	6.38457	7.36071	7.36786	6.51093	6.92684	7.01098	6.17158	6.08772	5.43967	4.10146	4.1051	3.82697	4.61765	4.95115	4.99979	5.45911	5.2427	5.36435	4.13787	3.90213	4.08957	5.39386	5.52605	5.47205	7.6308	7.84545	7.87996
CC2G_000962	7.21516	5.77777	5.83138	6.11861	6.55037	6.624	7.34449	7.41865	7.1113	6.91254	7.11918	7.07727	7.1036	6.89281	7.13894	7.04788	6.85669	6.84424	7.02348	6.96713	6.75317	7.66276	7.62732	7.70455	7.67368	7.45763	7.79694
CC2G_000963	4.09808	3.20165	2.77893	4.50553	4.23136	4.33133	5.91189	5.74016	4.83779	5.73293	5.68449	5.85376	5.86382	6.10614	6.03145	6.84416	6.82719	7.15663	6.78985	6.66401	6.32014	4.32571	4.18178	4.12406	2.90409	3.10198	3.35337
CC2G_000964	6.01929	4.79967	4.96661	6.75357	7.26736	7.13804	6.81487	6.84137	8.26551	7.86765	8.0748	8.06014	7.80498	8.06603	8.15058	8.19031	8.37793	8.62826	7.91746	8.20623	8.22655	8.23961	8.38886	8.28671	6.91743	7.07485	6.87304
CC2G_000965	2.17764	1.77053	2.11366	0	1.5387	2.65018	2.96933	2.57625	2.244	2.27165	2.11408	1.42655	1.93808	1.95749	2.26376	2.09677	1.97096	2.76334	1.98735	1.32274	1.45847	1.46682	0.895531	1.49285	0.139254	0.490143	0
CC2G_001309	0	0	0.561119	0	0	0	0	0	0.897165	0.191317	0.218754	0.248	0.3201	0	0.230002	1.51463	1.34025	1.53245	0.617031	0.523974	0.368893	0.234393	0.229045	0	0	0	0.266211
CC2G_001310	1.49337	1.38287	1.18127	0	0	0	0	0	0.364536	0.278232	0.218754	0.169976	0.261511	0.365566	0.299184	0.576887	0.516883	0.290046	0.374632	0.248141	0.432569	0.371859	0.426659	0.279131	0.38295	0.265787	0.139237
CC2G_001308	6.64842	7.13507	7.05019	4.14595	4.18173	4.90814	4.25212	4.40506	3.80075	1.85734	2.00061	2.00034	2.4779	2.42854	2.19281	4.24993	3.88631	3.60758	2.72981	2.63049	2.51603	5.12639	5.05202	5.10015	5.25512	5.0647	4.89606
CC2G_001300	9.88064	10.8324	10.9623	8.45163	9.30301	8.96116	8.09001	8.18268	7.86321	7.53077	7.47211	7.75909	7.51445	7.69445	7.76262	9.79708	9.70042	9.39014	8.44824	8.49696	8.62244	7.95303	8.08468	8.06604	8.32149	8.49456	8.18981
CC2G_001301	3.8852	4.84073	4.80426	3.46232	3.63598	3.82717	5.25736	5.01223	3.55827	3.36292	3.63934	3.16028	3.70303	3.83449	3.62639	3.4373	3.29406	3.09948	3.6915	3.40211	3.69442	3.51201	3.47916	3.32465	2.76046	2.90175	2.73856
CC2G_001302	5.3479	5.9339	5.7445	4.00298	4.27933	3.89271	6.49406	6.44087	3.70859	3.65856	3.89887	3.58538	3.93629	3.89167	3.99812	4.01178	4.0537	3.82718	4.22737	4.1911	3.87142	2.62638	2.91423	2.89865	1.14797	1.14649	0.773369
CC2G_001303	4.58899	3.25122	2.60195	4.50553	4.82322	4.90814	2.90812	3.16063	6.06553	5.87739	5.9971	6.328	5.2333	5.28148	5.0904	6.82968	7.17517	6.53171	5.85771	5.65775	5.86785	4.38375	4.36158	4.65085	2.98017	2.49894	3.1042
CC2G_001304	2.96988	3.89022	4.16643	5.67554	5.83009	5.16845	5.94655	5.99345	6.25664	6.58511	6.41204	6.41619	6.45119	6.81956	6.70537	5.81317	6.07263	6.24345	5.81427	5.84525	5.88218	6.75676	6.70608	6.862	6.01432	5.82865	6.25902
CC2G_001305	5.05069	6.11549	5.98727	4.00298	2.87796	3.04553	5.72488	5.34734	3.73997	3.98355	3.9302	3.87694	4.04884	3.93039	4.11305	2.79788	3.07389	3.34054	3.34933	3.18111	3.1389	4.71943	4.79319	4.66912	2.96152	2.75816	2.71649
CC2G_001306	6.53004	6.12882	5.95077	4.95727	4.61465	4.50903	4.51074	4.22531	7.46704	6.52306	6.68959	7.15969	6.43554	6.39821	6.36165	8.29237	8.34135	8.38738	8.15929	8.28241	8.16608	5.73702	5.95341	5.89455	6.17874	5.84904	6.25136
CC2G_001307	7.71785	8.08877	8.22594	7.1427	6.69888	7.31582	7.19074	7.25639	6.4493	5.75583	5.87362	5.88919	5.74589	5.80649	5.96913	6.20265	6.1031	6.18062	5.93246	5.76786	5.85774	7.09072	7.18687	7.36253	5.39719	5.6686	5.51998
CC2G_001313	1.04818	1.70089	1.68643	2.11792	0.709386	1.86343	0.406341	0.412428	1.36797	0.511383	0.94695	0.459556	0.3201	0.758839	0.758171	0.285108	0.309604	0.1523	0.560142	0.755439	0.60829	0.667246	0.544805	0.0750068	0.591369	0.933809	0.490867
CC2G_001311	6.16168	6.49821	6.72667	6.75357	7.48245	7.4525	7.1267	7.13936	7.81153	6.88511	6.49032	6.72411	6.54629	7.00913	6.97088	8.94883	8.86402	8.88492	8.03759	8.28009	8.54757	4.7162	4.9216	5.07296	4.38978	4.93714	5.00477
CC2G_001312	5.56847	5.62634	5.60114	7.15966	7.68748	7.75085	8.15567	8.10851	6.43259	6.29586	6.2425	5.9208	6.29656	6.32744	6.69658	5.16833	4.92573	5.29239	5.21852	5.09407	5.08423	6.12759	6.32767	6.21991	4.12237	4.50756	4.0446
CC2G_001314	7.56921	6.83127	6.91842	5.97275	6.54056	6.47147	7.00774	7.03401	6.62974	6.54842	6.80886	6.78099	6.88573	6.6982	6.91343	7.07794	6.91737	6.84144	6.83251	6.85387	6.65314	6.56759	6.70449	6.7391	5.91121	6.06058	5.96351
CC2G_001315	8.17874	7.68877	7.63956	5.52667	5.16715	5.58007	3.49154	3.78037	5.59789	5.61891	5.70426	5.51417	5.44226	5.09929	5.44544	5.36089	5.12096	5.28623	5.0938	4.97285	4.92731	5.06689	4.80212	5.07067	6.19679	6.17406	6.16028
CC2G_001316	8.71185	9.4371	9.4765	6.11861	6.93435	7.01098	6.46779	6.5945	5.92584	5.22119	4.9651	5.52597	5.26906	5.59897	5.08796	6.93777	6.88793	6.75634	5.62269	5.97718	5.94766	3.45126	3.37933	3.57127	3.36777	3.18455	3.56578
CC2G_001317	4.34549	5.37567	5.37742	5.97275	6.10762	5.86771	7.57733	7.50266	5.50048	6.02764	6.01669	5.93414	6.12847	6.31286	6.41717	5.83128	5.75222	5.66587	5.59817	5.75287	5.66906	6.77314	6.66508	6.54251	8.43144	8.10861	8.39089
CC2G_001318	2.7122	3.9364	3.96156	4.27603	4.49785	4.42291	5.16226	4.70875	3.88737	4.43986	4.07738	3.97197	4.19297	4.42849	4.19702	2.70424	3.19949	3.17256	3.70468	3.56348	3.55832	3.32995	3.21083	3.33993	3.46365	3.62391	3.1378
CC2G_001330	4.49646	4.31996	4.0191	3.66589	3.1079	3.75851	3.16516	2.9605	5.19558	5.04649	5.27267	5.43299	5.24658	4.96985	5.32827	5.81876	5.6705	5.70026	5.66208	5.80061	5.4861	5.75127	5.52065	5.53318	4.196	4.43521	4.05343
CC2G_001331	4.86227	5.22876	5.37742	7.65421	7.54756	7.81565	7.83644	7.93697	6.73472	6.94029	6.55036	6.4893	6.71952	6.96119	6.82015	6.67939	6.70077	6.63875	6.41393	6.2902	6.28822	6.61683	6.64456	6.60712	6.80163	6.86429	6.56101
CC2G_001332	3.39293	3.32251	2.56379	4.00298	4.37075	3.95541	6.28426	6.32951	5.294	5.76902	5.76343	5.66578	6.22362	5.98919	5.97838	5.23052	5.36673	5.53688	5.90987	5.54242	5.49917	5.98486	5.98249	6.13591	4.0711	4.38022	3.94371
CC2G_001333	7.09183	5.97136	6.10155	6.902	6.41733	6.33667	8.22945	8.29411	6.76363	7.28796	7.16708	7.09717	7.14673	7.20852	7.44969	6.51678	6.81067	7.08686	6.61846	6.47098	6.42268	7.23286	7.36808	7.35972	4.99122	5.84651	5.00021
CC2G_001334	3.42197	4.1734	3.70529	4.27603	4.41437	3.44562	6.68177	6.51059	4.54094	5.15095	5.01951	4.82062	4.88354	4.75247	4.81726	4.24993	4.20741	4.56762	4.6753	4.50114	4.5216	5.03877	5.05202	4.82664	4.79455	4.80244	4.37559
CC2G_001338	5.35168	5.28933	5.08585	5.47342	5.5849	5.61932	8.02392	7.87934	5.39109	5.89125	5.67835	5.70089	5.63054	5.66278	5.50156	5.49625	5.5694	5.39139	5.98473	5.9187	5.9326	4.87497	4.73845	4.70498	4.46452	4.51397	4.73523
CC2G_001339	2.75847	1.83697	2.44286	4.87754	5.69512	6.00741	4.75626	4.75369	4.50486	3.91061	3.60092	3.20008	3.97327	3.95742	3.66622	3.75002	3.56892	3.56071	3.23586	3.05647	2.95598	3.11178	3.16544	3.5185	2.96152	3.01439	2.57647
CC2G_001340	7.00573	6.75815	6.72667	6.63735	6.57941	6.61432	7.08409	7.27037	6.73277	7.26553	7.38482	7.3624	7.2355	7.29637	7.32461	6.8359	6.97889	7.01665	7.36968	7.27514	7.32216	7.55816	7.70392	7.7064	7.38184	7.48721	7.48155
CC2G_001348	0	0	0	0	0	0	0.573356	0	2.05733	5.09518	2.88468	2.02271	0.718863	1.89174	1.02646	2.56469	3.3357	3.2336	4.72791	4.97285	7.22828	1.77018	1.17745	1.81073	3.85575	4.08585	4.79437
CC2G_001349	0.279274	0.402256	0	0	0	0	0	0	0.897165	5.69986	4.2774	2.40976	1.03094	2.26505	0.3652	2.00158	2.45946	2.04177	1.70198	1.78232	2.8666	0.866515	0.803713	0.666326	3.40964	3.8329	3.46348
CC2G_001346	3.34825	3.77633	3.63342	3.66589	3.48049	2.30978	1.3932	2.21418	2.59232	3.17185	3.01701	2.98908	2.75772	2.97519	3.21663	3.79045	3.49733	3.78702	3.81213	4.0125	4.5289	2.55599	2.30957	2.19394	3.62639	2.84195	3.23416
CC2G_001341	6.8595	6.4697	6.72018	6.31299	6.3738	6.25179	7.29603	7.14611	6.17576	5.94868	5.93282	6.09453	6.03428	6.19287	6.40643	6.15146	6.0457	5.98528	5.72974	5.97575	5.74313	6.1718	6.20742	6.05137	6.58727	6.36673	6.2967
CC2G_001342	3.0277	2.61945	2.99507	5.03282	3.96417	4.37785	7.34593	7.07353	3.54056	4.22147	4.18951	3.60033	4.45396	4.44768	4.33931	1.33886	1.19697	1.22409	2.4767	1.97829	1.54744	4.65016	4.52504	4.30243	2.71665	2.44637	1.93999
CC2G_001343	4.09808	2.79682	2.60195	2.94136	2.44513	1.57485	2.63346	2.21418	2.69196	2.64312	3.13822	3.12969	3.02758	2.54718	2.90884	3.292	3.20699	3.10882	3.34091	3.6233	3.23131	3.37153	3.47916	3.5252	2.90409	2.80066	2.36575
CC2G_001344	2.88899	0.974322	1.37	2.58761	2.26623	0	1.91274	1.57799	2.32899	3.55792	3.73706	3.42668	3.43794	2.64354	3.38521	3.31593	3.36951	3.47663	3.93468	3.87163	4.21257	6.3278	5.45237	5.75183	6.92827	6.2755	6.64081
CC2G_001345	1.8757	1.0878	0.841857	3.46232	3.1079	1.86343	1.71248	2.16179	2.19955	2.22864	2.50933	2.04474	1.99313	1.97876	2.21088	3.01815	3.15366	2.94118	2.05067	2.22988	2.32792	4.0669	3.74906	3.47069	4.24309	2.11697	3.68423
CC2G_001353	4.94962	4.02456	4.21648	2.94136	3.21045	2.65018	4.83236	5.16641	2.95522	3.79008	3.90414	3.73513	3.80399	4.18947	4.1603	3.03748	3.52159	3.35631	4.21361	3.98995	4.1989	4.59155	4.46261	4.41136	4.43102	4.16119	4.45771
CC2G_001354	5.7907	6.28571	6.56945	2.94136	4.02171	4.12863	4.68506	4.77999	5.06539	4.28056	4.42031	4.41406	4.37671	4.42074	4.5562	4.41048	4.48847	4.7002	4.63799	4.52877	4.48076	4.80689	5.02686	4.86677	4.27364	3.78077	3.80418
CC2G_001355	9.503	8.68696	8.65592	2.58761	4.13034	3.89271	5.40312	5.55454	5.66482	4.84056	5.19742	5.01446	5.35388	5.0871	5.14545	6.51161	6.19835	6.71183	6.00884	6.20957	5.95581	6.70485	6.55235	6.85869	4.99581	5.10342	4.93481
CC2G_001356	8.36504	7.86726	7.83946	5.10462	4.18173	4.37785	4.83236	4.71785	5.0021	4.08348	4.71827	4.81422	4.37671	4.45907	4.72284	5.40991	5.06841	5.3933	4.39127	4.64154	4.46942	6.24745	6.34711	6.48694	4.96338	4.46855	4.5604
CC2G_001357	6.00497	6.53869	6.5862	7.0181	6.83351	6.44986	8.82813	8.63282	6.27817	7.18768	6.7479	6.81744	6.90021	7.09015	7.01909	5.8005	6.42505	6.26554	6.5388	6.1675	6.37485	7.03618	7.09363	6.93806	5.49444	5.73037	5.40048
CC2G_001358	5.6688	5.37007	5.24503	5.47342	5.50645	5.43361	6.70445	6.74674	5.61914	5.62099	5.75179	5.54348	5.63488	5.56422	5.5538	5.76181	5.89136	5.9916	5.69218	5.6031	5.79856	6.04649	6.07867	6.07783	4.38279	4.90341	4.87628
CC2G_001359	5.73682	6.64681	6.67166	7.0181	7.38714	7.47941	7.81054	7.5733	6.40104	6.23876	5.93153	5.89527	6.043	6.37534	5.92329	6.63409	6.89839	6.68085	6.55891	6.53467	6.71687	6.8339	6.85789	6.76056	7.36065	7.31554	7.25723
CC2G_001360	4.71166	4.79967	4.72003	5.41814	5.5849	5.19467	6.10495	6.45726	5.31499	5.4014	5.56317	5.20502	5.88217	5.62281	5.45495	4.70146	4.7392	4.6909	5.25259	5.22049	5.1801	4.90075	5.02686	4.6961	5.05418	4.90828	5.2815
CC2G_001361	7.21516	9.16985	9.03766	3.46232	2.06196	3.2594	2.67079	2.10743	4.23442	3.302	3.13822	3.32234	3.12938	3.14472	3.33667	3.26765	3.44755	3.99272	3.60976	3.73596	3.75171	4.78552	4.78121	4.61359	5.76563	5.77636	5.85151
CC2G_001352	5.60058	5.31286	5.51877	7.40688	6.54056	6.54466	3.95203	3.55521	6.00223	5.59371	5.60583	5.66756	6.01445	5.97735	6.07771	5.51705	5.49171	5.61597	5.76792	5.82788	5.65911	4.90075	4.97782	5.17239	5.36563	5.3198	5.36545
CC2G_001350	5.56847	5.56886	5.263	7.51623	8.02306	7.95257	6.59704	6.67847	6.58508	5.09817	5.08593	5.23406	5.20054	5.6677	5.0977	7.29471	7.1501	6.52997	5.6587	5.90521	5.87217	5.4551	5.46741	5.32998	9.88237	9.91563	10.0671
CC2G_001351	8.09557	8.05166	8.06023	6.84025	6.83351	6.75313	6.41926	6.26579	6.82161	6.50064	6.70929	6.69655	6.55241	6.50101	6.64851	7.49366	7.38805	7.33336	6.63577	6.78434	6.96044	6.93304	6.93633	7.00972	7.17281	7.32922	7.15632
CC2G_000980	5.70764	6.4697	6.39298	3.22523	1.5387	2.30978	1.3932	1.31566	2.36968	1.7088	1.74277	2.04474	1.31644	1.62124	1.86796	1.74368	1.82264	1.91972	3.48541	3.01241	3.08046	4.18354	4.02797	4.18459	6.10844	5.08634	6.57794
CC2G_001209	0	1.0878	0.841857	0	0	1.57485	0	0	1.00442	0.712044	0.576459	1.00023	0.718863	0.54737	0.656378	0	0.654876	0.918933	0.439156	0.585414	0.552061	5.48571	5.22127	5.33762	6.43845	6.61915	6.42302
CC2G_001214	7.43141	7.35647	7.55212	6.01062	6.44914	6.13477	6.64707	6.619	6.55452	6.45006	6.61203	6.48225	6.509	6.55156	6.6576	6.47132	6.50707	6.54467	6.3876	6.2763	6.32224	5.95509	6.07989	6.24652	7.18592	6.83007	7.43247
CC2G_001290	1.25598	2.32759	2.74523	0	0	0	0	0	1.36797	0.437774	1.13794	0.322019	1.19646	1.02729	0.853253	4.0879	4.52192	4.6044	2.76799	3.45244	4.579	3.08204	2.95748	3.08257	2.33726	2.54967	2.69408
CC2G_000966	7.18795	7.2987	7.34273	7.12555	7.57665	7.4525	6.9764	7.09115	7.60231	7.32224	7.50932	7.41196	7.42677	7.4191	7.44922	7.67658	7.69781	7.66235	7.27563	7.16374	7.20852	7.56624	7.65714	7.66337	7.70414	7.84862	7.86373
CC2G_000967	6.3339	5.71292	5.58218	5.23831	4.57676	3.75851	5.9274	5.92044	5.48204	5.49737	5.57973	5.45577	6.07312	5.69044	5.71913	5.83956	5.82955	6.01166	5.63995	5.64518	5.5485	5.11419	5.13207	5.38445	3.99062	4.08585	4.20378
CC2G_000968	5.20902	5.82355	5.79478	6.37237	6.50065	6.07955	8.20023	7.86712	5.24563	5.8188	5.59447	5.39705	5.82389	5.92764	5.74105	4.52786	4.74178	4.65947	5.54052	5.32099	5.41891	5.92469	5.92781	5.66193	4.57292	4.85381	4.90584
CC2G_000969	7.17094	6.34968	6.54027	6.34299	5.98278	6.77067	9.07914	9.12612	6.67103	6.88511	6.90002	6.63072	6.96819	6.88861	7.0223	6.29185	6.56511	6.7301	6.51374	6.10068	6.07658	6.64677	6.67484	6.57275	5.54228	5.81834	5.40738
CC2G_000970	6.54991	6.14201	6.00161	6.79756	6.82546	6.0654	6.25997	6.13604	6.65877	6.46635	6.73391	6.78509	6.53706	6.55245	6.96424	6.71658	6.66378	6.85399	6.34193	6.35448	6.36367	7.61639	7.71026	7.82929	8.72714	8.86503	8.91313
CC2G_000971	5.35545	7.36634	7.18513	5.30077	4.7227	4.66722	6.78326	6.67146	4.18967	4.36737	4.17215	4.15525	4.63794	4.55423	4.32279	3.85178	4.04535	3.75168	4.04763	3.6451	3.68137	3.97817	3.9008	3.95564	2.92349	2.99622	2.98001
CC2G_000972	6.72615	7.4215	7.44991	4.60791	3.70786	4.77543	5.43059	5.41044	3.80075	3.4309	3.46493	3.2578	3.63543	3.48657	3.43217	3.91061	3.69159	3.60758	2.58047	2.61584	2.66927	3.33837	3.41855	3.17923	1.73583	1.93813	1.69113
CC2G_000973	5.38155	4.57481	4.6489	4.50553	4.37075	4.37785	5.35806	5.65744	4.41051	4.06526	3.95072	4.22925	3.9549	3.96809	4.01364	4.61083	4.65124	4.67841	4.60673	4.63066	4.45799	5.58626	5.52964	5.72733	3.74016	3.90286	3.45017
CC2G_000974	4.55662	4.70502	4.79606	6.11861	5.83009	5.88391	7.15989	7.13596	6.06553	6.4049	6.14796	6.05979	6.29929	6.46661	6.19694	6.01676	6.47714	6.33285	6.35975	6.24808	6.35855	5.25192	5.06444	5.23096	5.08466	5.10766	5.20033
CC2G_000975	6.11798	6.22188	6.3176	4.60791	4.91719	4.97018	4.8241	4.9595	4.83779	5.15669	5.14275	5.27191	5.29119	5.22475	5.12654	4.99629	5.06429	5.13901	5.4357	5.31647	5.413	5.46473	5.23012	5.47897	4.4777	4.42166	4.47753
CC2G_000976	5.52564	5.49877	5.43669	0	3.56033	4.28326	4.41498	4.66237	4.36091	4.57903	4.48503	4.49229	4.64369	4.43619	4.67484	4.48275	4.46051	4.83856	4.64826	4.3187	4.44261	4.66027	4.54998	4.62612	4.83609	5.1939	4.75702
CC2G_000977	7.98316	7.58989	7.52383	6.77573	6.70767	7.01098	8.39406	8.39044	6.3151	5.59583	5.80627	5.61332	6.00109	5.74886	5.95847	6.22705	6.40563	6.43941	5.56602	5.33671	5.13774	6.43954	6.47911	6.43183	6.15021	6.16188	5.88653
CC2G_000978	5.29001	5.53924	5.70997	6.81906	7.08367	6.93524	5.9915	5.86008	7.28622	6.7076	7.02498	7.10702	6.9026	6.82984	7.00363	7.80371	7.64806	7.56731	7.07832	7.27397	7.44303	7.16176	7.24257	7.2827	7.05241	7.24419	7.02668
CC2G_000979	7.34497	5.33602	5.47831	8.32208	7.92089	8.55343	8.34655	8.24931	7.5991	5.97657	6.00693	5.69915	6.78273	6.56217	6.50855	5.82295	5.71062	6.11492	6.08139	5.96423	5.90621	5.95919	5.64161	5.96157	6.32996	6.29607	6.5122
CC2G_000981	3.18843	3.22665	3.10545	6.75357	5.11523	4.87609	10.6079	10.5324	4.98255	6.72994	6.48944	6.465	5.76315	5.75811	6.06535	4.88868	4.99667	4.88006	4.94343	5.05388	4.94379	3.49706	3.64708	3.53852	5.71086	4.65964	5.89638
CC2G_000982	6.71299	6.46446	6.59805	5.76688	5.40197	5.22043	6.06345	6.37336	5.7482	6.28147	6.27438	6.32463	6.31738	6.37434	6.41522	5.82851	5.975	6.02158	6.31316	6.30283	6.23676	5.91769	5.98118	5.87763	5.28543	5.46563	5.54211
CC2G_000983	7.30461	7.71771	7.73816	8.03107	8.04056	8.32024	7.92311	7.92228	7.40843	7.48582	7.42844	7.34808	7.51875	7.57648	7.50656	7.50585	7.57061	7.49212	7.33936	7.41021	7.38185	7.40991	7.43033	7.35643	7.62341	7.6631	7.73996
CC2G_000984	5.17957	5.98973	5.87877	5.89389	5.78094	5.51911	4.05445	4.27548	5.30977	4.92043	5.05311	4.89829	4.64655	4.93219	4.88352	5.599	5.57231	5.62739	5.05572	5.17874	5.26344	5.6177	5.52245	5.69649	7.36775	7.53205	7.28749
CC2G_000985	6.79436	6.40274	6.52794	5.57802	6.23472	6.07955	6.41926	6.40469	6.37878	6.04942	6.33513	6.2789	6.23318	6.10976	6.24266	6.34711	6.39828	6.66035	6.29476	6.25636	6.31381	6.15166	6.2688	6.27364	6.68571	6.71394	6.67841
CC2G_000986	3.8852	3.36815	3.43632	2.94136	1.18283	2.79434	2.90812	2.9295	2.98171	2.35399	2.6664	2.87076	2.57733	2.58927	2.47284	3.11229	3.17676	3.47663	3.02081	3.02356	3.09037	2.10199	1.95146	1.99584	2.01438	2.08293	2.27806
CC2G_000987	3.89559	4.05279	3.79037	2.11792	1.82392	3.15643	6.19419	6.11553	3.32987	3.50485	3.41413	2.98908	3.36328	3.71917	3.62639	3.5425	3.55723	3.54703	4.10345	3.91415	3.93876	3.8369	3.90632	3.77622	3.6844	3.55108	3.68423
CC2G_000988	6.47914	6.50333	6.55979	6.28236	6.23472	6.10742	6.19419	6.33544	6.11124	5.58734	5.79213	5.89527	5.87852	5.98263	5.93013	6.8421	6.56511	6.54036	6.15167	6.17501	6.24786	5.93026	5.93053	6.0362	5.91121	5.8988	6.06087
CC2G_000989	4.6269	3.39045	3.37153	3.84426	4.27933	4.50903	5.60465	5.74462	4.20099	4.84769	4.86328	4.61882	4.762	4.68937	4.53126	4.24993	4.22598	4.23802	4.89824	4.75619	4.76364	4.79471	4.84017	4.76284	6.25729	4.95607	5.59448
CC2G_000990	2.95008	2.37308	1.94579	6.15288	5.78094	6.27655	5.56058	5.53922	5.02775	5.30378	5.19097	5.10897	4.86152	4.86811	5.06083	4.79527	4.50377	4.73379	4.45896	4.30049	4.31326	4.37151	4.38553	4.42576	5.75755	4.90341	5.04074
CC2G_000991	5.02726	5.27742	5.0791	4.70349	5.44467	5.34273	7.40942	7.24699	4.78611	4.97348	4.81654	4.56268	5.08281	5.27934	4.93605	5.50321	5.53257	5.27798	4.56397	4.68078	4.49947	4.50079	4.42459	4.47506	4.0536	3.92224	3.91493
CC2G_000992	6.68481	5.89545	6.01581	3.46232	3.56033	2.1038	4.30056	4.38235	3.95579	4.36737	4.37169	4.86463	4.41417	4.18032	4.28492	5.21151	4.91203	5.00537	4.37486	4.48107	4.49575	3.66028	3.62041	3.9	7.28954	7.19125	7.21752
CC2G_000993	6.40835	7.35647	7.27201	5.30077	4.79049	5.29505	6.9764	6.87634	4.71683	4.60027	4.47798	4.38414	4.68885	4.82178	4.68134	4.31472	4.50985	4.70944	4.59969	4.44008	4.64433	5.31933	5.29056	5.29511	4.94451	5.19789	5.06714
CC2G_000994	6.50651	7.28241	7.17092	4.14595	4.49785	4.18203	4.63871	4.78865	4.57614	4.29627	4.2774	4.40131	4.53349	4.40118	4.51317	4.93578	5.09088	5.07374	4.92665	4.68078	4.73235	5.61942	5.57721	5.43694	5.63051	5.8791	5.67107
CC2G_000995	6.13781	6.92206	6.9372	3.84426	3.1079	2.9254	3.72241	3.97509	2.52186	2.62665	2.33303	2.32229	2.3146	2.79509	2.81747	2.93815	2.78418	2.41744	2.3814	2.80852	2.69546	3.25195	3.26348	3.3922	3.45033	3.88321	3.2649
CC2G_000996	6.21657	6.72125	6.62841	6.7082	7.04256	6.83877	6.75312	6.38484	5.94279	5.37699	4.71227	5.57788	4.97298	5.85042	5.18254	7.24933	7.10717	6.63794	5.99818	6.33896	6.7756	5.53595	5.54744	5.53152	3.80435	4.20932	3.73999
CC2G_000997	3.70791	3.95147	3.53824	7.66612	7.79865	7.90968	5.58523	5.65271	7.05471	6.95685	7.30143	7.12457	7.21007	7.47723	7.18878	7.31366	7.333	7.34032	6.83775	6.97145	7.20511	6.07948	6.06514	6.05601	6.07847	6.14549	5.73833
CC2G_000998	5.79348	5.09263	5.39383	7.0181	6.67217	6.49277	6.11175	6.27815	6.77882	6.58191	6.61524	6.60686	6.56912	6.84077	6.81573	7.20622	7.0489	7.09452	6.48059	6.799	6.93867	6.62459	6.56639	6.62361	7.38971	7.50016	7.36668
CC2G_000999	5.7907	5.95649	5.81116	4.27603	5.33545	5.38889	3.29037	3.10622	5.05919	6.10991	6.34	6.11289	6.44873	6.11457	6.2261	5.63592	5.75988	5.38947	5.20467	5.1306	4.85942	6.06941	6.26342	6.16839	6.16862	5.60706	5.82597
CC2G_001000	8.17395	7.52336	7.62574	5.10462	6.05346	6.00741	5.61904	5.69018	5.82337	5.62514	5.71028	5.75199	5.77629	5.6562	5.82262	6.30586	6.23549	6.29448	5.92965	5.90069	5.74783	5.65353	5.78656	5.7618	5.25895	5.26394	5.38657
CC2G_001001	5.02726	4.61323	4.54501	6.4294	6.59844	6.624	8.38776	8.49273	7.64851	8.58795	8.27337	8.32717	7.66543	7.87153	7.92635	7.88863	8.15765	8.30775	7.52639	7.64565	7.88841	5.08949	4.71659	4.67214	4.64481	3.89307	4.2117
CC2G_001002	4.33789	2.45996	2.56379	7.10819	7.54756	8.05989	8.87036	9.0045	6.99744	6.34072	6.52151	6.56269	6.57289	6.316	6.60904	7.80547	7.80701	8.23043	6.757	7.00064	7.05704	5.74337	5.49886	5.4064	5.17241	4.9932	4.80487
CC2G_001003	5.98078	4.59414	4.57409	6.15288	6.0396	5.94698	7.28253	7.37474	6.46816	6.29976	6.41019	6.32463	6.49794	6.48065	6.37773	7.04669	7.07167	7.00669	6.50435	6.53953	6.43049	6.64507	6.66671	6.69371	7.43011	7.32467	7.5155
CC2G_001004	8.65107	8.71262	8.68898	8.33707	7.66959	8.05274	10.9495	10.758	7.23621	7.77121	7.57025	7.5646	7.81901	7.71321	7.7195	7.13063	7.26143	6.92313	7.38255	7.21384	7.26646	7.44002	7.47334	7.37557	6.92226	7.1681	6.72889
CC2G_001005	8.12622	8.19549	8.24565	6.56284	6.65409	6.88781	9.36512	9.48939	6.73082	6.75573	6.72202	6.44857	6.83452	6.59352	6.92099	6.57249	6.6901	6.9448	6.07252	5.78269	5.83141	6.29252	6.42622	6.44426	4.33288	4.65386	4.47753
CC2G_001006	6.8727	7.14821	7.39528	6.45709	6.75933	6.47147	6.05993	6.10169	7.24444	6.38178	6.80675	6.74948	6.91097	6.62674	6.96291	7.4569	7.29568	7.37702	6.70629	6.72073	6.67717	7.17474	7.28775	7.27626	8.18548	8.21507	8.26492
CC2G_001007	8.03166	6.72783	6.83477	8.03107	7.85118	8.04916	9.11089	9.05475	7.23621	6.64357	6.73613	6.71813	7.05861	6.92672	6.51402	7.55529	7.60153	7.53519	6.65032	6.68082	6.61334	6.73463	6.80263	6.86068	8.38496	8.65483	8.35919
CC2G_001008	7.43141	7.28984	7.20076	6.68497	6.78448	6.9196	7.72661	7.47743	6.03739	5.60846	5.41234	5.52205	5.79707	5.94395	5.5216	6.56419	6.58611	6.14928	6.47963	6.49919	6.43439	6.37047	6.31629	6.29341	6.59637	6.69435	6.75754
CC2G_001009	3.68414	4.1734	4.0191	5.57802	5.11523	4.74026	6.57997	6.619	4.18967	4.47248	4.40552	4.2719	4.62638	4.53641	4.7102	2.86432	2.57986	2.4324	3.72423	3.5404	3.50006	4.57029	4.57449	4.35604	3.75106	4.06856	3.6497
CC2G_001010	7.80103	7.6955	7.60944	5.89389	6.09427	6.56491	6.50444	6.39905	5.84156	5.33453	5.32861	4.92228	5.53019	5.4958	5.56262	5.62319	5.25179	5.31072	5.25483	4.9843	4.68084	5.53412	5.65645	5.27736	5.59465	5.64838	5.50718
CC2G_001011	3.15423	2.76305	2.60195	0	0	0	0.406341	1.10985	2.55752	3.60912	3.49317	3.47615	1.82124	1.99972	1.53665	1.76702	1.65732	1.73904	1.82781	1.46029	1.36365	0.435973	0.939337	0.341223	0.856533	0.590463	0.382908
CC2G_001012	7.50196	8.12079	8.01145	9.19793	8.30094	8.34679	10.2383	10.1137	7.17583	7.32224	7.0274	6.95319	7.24403	7.38665	7.1687	5.5561	5.93039	5.54033	6.60885	6.45461	6.33895	6.91487	6.85002	6.63605	6.26681	6.11212	5.97517
CC2G_001013	1.59886	1.29106	1.61359	3.46232	3.1079	4.12863	5.9274	5.7798	3.78579	4.64184	3.99089	3.66576	4.19688	4.71811	4.44612	3.5693	3.76962	3.35631	3.39884	3.2586	3.70735	3.38783	3.19284	3.11848	4.01795	3.48745	3.75089
CC2G_001014	6.07292	6.7667	6.60277	5.85279	5.40197	4.77543	7.34015	7.01936	4.8736	5.74823	5.57643	5.34474	5.78931	5.74576	5.65624	4.94605	5.06222	4.95447	5.70043	5.5111	5.66409	5.45122	5.61484	5.19358	7.14001	5.58595	6.2967
CC2G_001015	2.33859	1.70089	0.708306	5.6276	4.9472	5.56003	5.93125	5.8477	5.81234	6.05559	6.04559	6.07191	6.37982	6.36931	6.20259	5.73986	5.93039	5.95452	5.79745	5.78269	5.8373	5.42776	5.3607	5.61086	4.41055	3.90286	4.33994
CC2G_001016	3.82124	2.65671	2.99507	6.902	7.34831	7.29778	7.91632	8.06193	8.28559	8.70508	8.6915	8.53646	8.71725	8.83931	8.746	7.65289	8.26976	8.23391	8.27236	8.13385	8.42867	7.78203	8.03822	8.0089	7.93314	7.85115	7.93655
CC2G_001017	2.78106	1.19301	1.45585	5.03282	5.89312	5.02966	6.12862	6.10516	6.85245	6.74909	6.8572	6.78754	6.61883	6.94305	6.82676	6.26238	6.84232	6.97256	6.32602	6.56167	6.84012	6.11051	6.35623	6.29831	6.13156	6.17001	6.25328
CC2G_001018	3.42197	3.29913	3.18301	4.50553	4.41437	3.68642	5.22007	5.16641	4.85222	5.38436	5.27267	5.31559	5.50989	5.50499	5.3324	5.89491	5.95732	5.90177	5.95883	5.84995	5.81209	6.85017	6.95379	6.72898	8.73985	8.86971	8.71622
CC2G_001019	4.53019	4.54531	4.72867	4.00298	4.37075	3.95541	6.32873	6.30859	5.13196	5.08316	5.23763	5.48829	5.1245	5.23141	5.30953	5.62478	5.73676	5.56938	5.06598	5.14852	5.08671	5.21127	5.12971	5.31652	5.74397	6.06277	5.5975
CC2G_001020	2.78106	2.50152	1.68643	3.84426	4.85523	4.97018	2.47365	3.04969	5.91557	5.97819	6.00325	5.84437	5.87973	5.7333	5.68722	5.48221	5.47318	5.61925	5.89557	5.82629	5.72576	4.55593	4.64564	4.66001	6.25538	5.86415	6.56101
CC2G_001021	5.6688	5.59309	5.5287	4.50553	4.18173	3.68642	5.99519	5.93612	4.04643	4.18257	4.05387	4.91033	4.46698	4.51109	4.72913	4.9764	4.71311	4.76367	4.28117	4.53657	4.63759	4.43955	4.52144	4.42934	1.64526	2.33509	2.27806
CC2G_001022	7.27109	6.78364	6.96674	8.77135	9.05515	9.41737	9.6115	9.72736	8.24515	8.02241	7.98877	7.7271	7.98126	8.03241	8.42805	7.75784	7.74976	7.82985	7.18388	7.21323	7.14401	8.05799	8.21348	8.10626	7.13586	7.33556	6.94598
CC2G_001023	2.33859	2.82982	2.81186	3.22523	2.87796	3.04553	4.51074	4.07761	2.19955	2.09137	1.89871	1.3926	2.0287	2.11945	1.47818	1.56877	1.67905	1.71478	2.131	1.85896	2.0721	1.95657	1.66876	1.83251	1.44504	1.59594	1.49764
CC2G_001024	7.95177	7.74066	7.93691	7.83394	7.5028	8.08465	7.08755	7.0467	7.35624	7.26154	7.39515	7.42619	7.18221	7.25011	7.32978	7.816	7.75744	7.79773	7.60891	7.86049	7.7192	7.03424	7.21777	7.14479	8.49279	8.33425	8.65154
CC2G_001025	6.26546	6.21253	6.16983	4.39534	4.9472	5.24573	4.87297	4.74481	4.45846	4.30146	4.60636	4.34028	4.58815	4.45907	4.57376	4.60437	4.29093	4.19482	4.33727	3.96705	4.05459	5.0101	5.23232	5.28725	5.44831	5.45568	5.35119
CC2G_001026	6.57759	6.92206	6.69171	5.6276	5.31258	4.55023	6.39157	6.52622	4.60199	4.98967	4.89802	4.93413	5.29119	4.87095	4.94957	5.26167	5.24087	5.39521	5.36064	5.22773	5.28517	5.06435	4.99608	4.86413	4.98662	5.14112	5.25495
CC2G_001027	6.64534	6.21565	6.50798	6.61294	7.11044	7.16482	5.17531	5.19927	6.19287	4.90685	5.08129	5.29507	5.08281	4.93763	5.19167	6.77891	6.60681	6.33185	5.68221	6.19732	6.15299	5.61077	5.61653	5.61714	6.15021	6.28862	6.52654
CC2G_001028	4.17686	3.59625	4.00493	6.25106	6.48026	5.86771	6.21329	6.15291	5.77874	5.26972	5.35386	5.40559	5.44884	5.14469	5.45873	6.0204	6.07058	6.04001	5.55515	5.67021	5.59446	6.76146	6.94172	6.74126	7.20982	7.06725	6.87926
CC2G_001029	5.30568	4.18619	4.51532	4.39534	4.61465	5.16845	7.12333	6.86819	4.51397	4.76357	4.44582	4.56268	4.95691	5.01944	4.98936	4.99135	4.97926	4.76662	4.93506	4.9112	4.87383	4.22949	4.17263	4.00922	4.56058	4.6654	4.63877
CC2G_001030	6.00016	5.48847	5.74022	5.97275	5.92363	5.53972	5.64741	5.49227	5.93604	5.63547	5.81888	5.62616	5.71893	5.65454	5.86602	5.78057	5.65961	5.60941	5.2093	5.34562	5.38712	5.41589	5.45237	5.45986	6.66136	6.48059	6.38154
CC2G_001031	2.63988	5.53424	5.34966	0	2.26623	1.57485	2.5153	2.69159	1.19762	2.0175	1.69493	1.61502	1.62607	1.86914	1.50771	1.74368	1.3938	1.18929	1.62085	1.61562	1.60385	3.96193	3.56556	3.9	4.08839	4.301	4.13889
CC2G_001032	5.02726	4.0667	4.54501	6.18635	6.22251	6.3009	6.09469	6.26269	5.80494	5.64572	5.78787	5.57788	5.81245	5.91114	5.82848	5.43745	5.2536	5.46415	5.19769	4.95259	4.98685	6.11663	6.08478	6.16946	6.12947	6.10366	6.16436
CC2G_001033	6.99852	6.86549	6.95204	7.03657	6.98586	7.75085	5.30562	5.17305	6.61501	6.69087	6.61042	6.34141	6.32545	6.29602	6.27843	6.67862	6.61106	6.60697	6.08518	5.9187	5.99588	5.75598	5.76237	5.82156	6.31902	6.46416	6.34245
CC2G_001034	5.29001	4.68712	4.9069	6.98043	6.51073	7.03295	9.33236	9.44522	6.88088	7.31391	7.10209	6.86541	7.10204	7.30639	7.28038	6.93905	7.32397	7.41516	6.97193	6.7925	6.75395	6.70403	6.62541	6.66061	5.00949	5.42884	4.73523
CC2G_001035	3.15423	1.62771	2.35621	5.03282	4.45671	4.90814	6.89198	6.94382	4.85222	4.87931	4.77688	4.4267	4.69993	4.96187	4.88914	4.78958	5.22803	5.36435	4.8307	4.75285	4.48076	4.31296	4.44752	4.20142	2.86449	3.24736	2.30789
CC2G_001036	4.22708	4.50501	4.74582	4.14595	4.45671	3.95541	4.99573	5.12597	4.40073	4.34741	4.30554	4.55886	4.35235	4.18032	4.82314	4.51413	4.54578	4.90975	4.21361	4.39361	4.2484	5.18819	5.18307	5.29315	3.2187	3.39338	3.24961
CC2G_001037	4.62065	4.3769	3.90164	6.53712	6.68113	7.06884	6.01709	6.07715	6.53453	6.0815	6.15239	6.10111	6.10679	5.95606	6.17869	6.2469	6.395	6.55581	6.22898	6.30054	6.13516	5.91909	5.81916	5.84719	6.48326	6.53668	6.34784
CC2G_001038	7.58052	6.62348	6.53781	6.48427	6.35153	6.67145	8.05954	8.16366	6.64017	6.47212	6.34872	6.20868	6.53164	6.57094	6.64602	6.77316	6.8217	7.0123	6.58409	6.24926	6.47181	6.41787	6.38027	6.50824	7.27262	7.21207	7.35244
CC2G_001039	3.93641	4.54531	4.44359	4.79314	5.31258	5.02966	6.62346	6.43536	4.52301	5.71357	5.51405	5.50824	5.46678	5.5123	5.57139	3.82423	3.97243	3.91499	4.42352	4.38499	4.08957	5.0845	5.05949	4.96618	6.34623	6.25844	6.32432
CC2G_001040	5.19647	3.65267	3.51842	4.50553	4.07705	3.61053	5.69801	5.69939	5.04041	5.07711	5.11803	5.02281	5.35913	5.18413	5.68399	4.89133	4.80739	5.57107	4.8367	4.7394	4.85362	5.83984	5.82793	6.02442	5.12292	5.35232	5.1641
CC2G_001041	6.97422	8.01357	8.00879	7.55519	7.73126	7.51627	7.7916	7.96495	7.07485	7.28927	7.19099	7.12909	7.27815	7.2675	7.26263	7.26786	7.38351	7.35216	7.35198	7.54099	7.55411	7.69996	7.59087	7.4986	7.38096	7.47003	7.37022
CC2G_001042	3.40753	1.96131	2.16555	5.76688	6.21018	6.10742	5.71151	5.54945	7.02477	6.36699	6.64623	6.71556	6.62247	6.68775	6.53209	7.13512	7.11167	7.02531	6.80293	7.00977	7.00954	6.031	6.07253	6.22507	7.42417	7.55007	7.38341
CC2G_001043	1.8331	1.77053	1.61359	4.39534	4.45671	4.7042	3.85806	3.76289	5.69716	5.32945	5.74593	5.58729	6.12642	6.10252	6.32272	5.11702	5.21693	5.22097	6.38556	6.39794	6.42561	7.14328	7.19027	7.14968	6.31902	6.49199	6.517
CC2G_001044	2.58958	2.50152	2.26403	5.52667	5.16715	4.97018	5.00307	4.90477	6.15845	6.18213	6.0925	5.9763	6.86066	6.7038	6.82015	5.6873	5.8738	5.7652	6.83925	6.63796	6.78858	7.50825	7.45742	7.37835	6.71244	7.03868	6.80929
CC2G_001045	6.36227	6.55851	6.2591	4.87754	4.27933	4.18203	5.70703	5.8099	3.48608	4.14259	3.73114	3.90732	4.07884	4.19856	4.04419	3.56265	3.59201	3.6783	4.23648	4.1561	3.80681	4.74179	4.51783	4.7342	4.64481	4.87386	4.57274
CC2G_001046	4.84092	6.21565	6.18875	2.58761	2.87796	2.9254	2.24525	1.31566	4.79361	4.86534	4.98761	4.74863	4.62056	4.63682	5.04329	3.15715	3.58051	3.66569	4.26791	3.87778	3.96591	4.85458	4.83728	4.99543	5.46164	5.24866	5.30387
CC2G_001047	8.19461	8.27102	8.21135	5.41814	6.35153	6.61432	6.56021	6.31159	5.81234	5.86691	5.95964	5.90584	6.26615	5.91804	5.80934	6.22915	6.00971	5.86227	6.49014	6.55112	6.24897	5.28057	5.26497	5.04991	5.42468	5.30512	5.37605
CC2G_001048	5.42881	5.33027	5.25704	5.47342	4.79049	5.69475	7.03125	6.59697	5.68914	6.84652	6.4295	6.27425	6.01335	6.3893	6.09362	5.31411	5.77131	5.3026	6.13959	6.10068	6.33895	5.43367	5.3906	5.36963	3.96276	4.12819	3.88556
CC2G_001049	5.48493	4.85683	4.81242	6.73106	6.82546	6.54466	6.60429	6.80554	7.26481	7.30034	7.43574	7.29047	7.18171	7.21749	7.09766	7.35853	7.333	7.2323	7.12258	7.23496	7.21985	6.47239	6.63626	6.59203	5.67983	5.88899	5.69666
CC2G_001050	5.89276	5.82764	5.95446	5.67554	5.89312	5.91579	6.16505	6.11553	5.04041	5.18227	5.20811	4.98628	5.40722	5.25339	5.07075	5.48924	5.14263	5.25713	5.08878	5.34783	5.43065	5.55231	5.46741	5.45811	4.61529	4.94664	4.65627
CC2G_001051	6.59682	5.82355	5.92842	6.7082	6.88093	6.788	6.13197	5.9006	6.73277	6.30235	6.5377	6.53573	6.25211	6.19515	6.51038	6.58568	6.54454	6.65637	5.84139	6.14727	6.15299	6.2751	6.21635	6.28455	5.59163	5.93503	5.83368
CC2G_001052	6.52837	7.18375	7.12907	4.60791	5.52646	5.24573	6.29924	6.39338	5.43489	5.41585	5.48973	5.358	5.42901	5.31112	5.49788	5.05437	5.04559	5.26341	5.39358	5.12544	5.12576	5.47431	5.35667	5.17025	4.67945	4.84875	4.81009
CC2G_001053	7.06906	6.16806	6.26506	6.61294	6.50065	6.46071	7.98925	8.07527	6.84345	6.84029	6.81026	6.59757	6.32276	6.52831	6.62681	6.45704	6.63349	6.90313	6.32175	6.11768	6.1741	7.13787	7.12242	7.13112	7.36509	7.41466	7.40513
CC2G_001054	5.49863	6.06442	5.95077	4.60791	4.7227	4.90814	5.78995	5.70398	4.45846	4.04061	4.40552	4.18034	4.50536	4.30763	4.49486	4.59787	4.47921	4.48036	4.26346	4.3322	4.49947	4.90642	4.95399	4.82664	3.82513	3.5004	3.51554
CC2G_001055	8.61144	8.12412	8.2821	7.10819	7.48245	7.56231	8.97106	9.04709	7.30863	7.80362	7.80347	7.60825	7.67493	7.76386	7.81708	7.60835	7.63735	7.83373	7.41801	7.32384	7.27463	7.06624	7.04056	7.04221	6.82116	6.53038	6.65684
CC2G_001056	10.0459	9.86312	9.92803	9.06926	8.66152	8.96688	12.0951	12.0533	8.08332	8.63862	8.43179	8.34475	8.72506	8.63534	8.66497	8.6006	8.81241	8.58101	8.18745	8.02129	7.93553	8.2061	8.11335	8.11184	6.87322	7.10802	6.52178
CC2G_001057	6.42279	7.1168	6.9849	7.93587	7.63313	7.92151	9.54017	9.44761	6.67712	7.25351	7.09519	6.91857	7.40282	7.50269	7.41358	6.05282	6.12899	5.90042	6.73307	6.47504	6.25778	7.52769	7.58097	7.29403	7.97442	7.8935	7.89047
CC2G_001058	2.10787	1.46918	1.53688	0	2.44513	2.30978	2.90812	2.8323	2.6263	2.50578	2.45292	2.20981	2.11396	2.45913	2.36403	2.92783	2.66944	2.63992	2.46125	2.52468	2.24167	5.15999	5.21905	5.05917	5.65972	5.53964	5.39354
CC2G_001059	6.64072	5.5786	5.64749	6.68497	6.94925	6.99615	8.67865	8.64181	6.43259	6.8773	6.8781	6.70954	7.02323	7.02966	7.16697	6.29787	6.42906	6.38375	6.50057	6.56167	6.46896	7.24353	7.19084	7.13496	6.24385	6.39995	5.86662
CC2G_001060	1.31909	0.851145	1.07676	0	2.26623	3.15643	2.38658	3.10622	3.78579	4.07743	3.78925	4.05571	3.05371	3.64794	3.52895	3.50828	3.24391	3.38734	3.93468	3.7155	3.76414	1.95657	2.49712	2.25972	3.13796	3.01439	2.90393
CC2G_001061	8.41193	10.1615	10.1631	8.41679	8.88535	8.87459	7.06319	6.95348	7.75506	7.33813	7.27065	7.47467	7.16133	7.24628	7.12887	8.32616	8.21804	8.0759	7.64825	7.71043	7.76049	7.38119	7.24639	7.25474	7.57975	7.5763	7.49052
CC2G_001062	8.03401	9.1642	8.97316	8.19628	8.3883	8.75633	7.62685	7.49077	7.03271	7.03225	6.65094	6.72155	6.84329	7.19097	7.04828	7.71946	7.62025	7.48766	7.64226	7.57357	7.76784	7.64846	7.66613	7.52015	7.71183	7.94947	7.77375
CC2G_001063	2.86804	2.61945	2.40019	3.84426	1.18283	1.86343	2.55577	2.26472	3.52263	3.64227	3.4506	3.37545	3.40448	3.43365	3.47016	3.95702	4.30847	3.93087	3.84226	3.5937	3.66158	6.78704	6.71004	6.57032	6.55187	6.85424	6.31517
CC2G_001064	3.33304	2.98437	3.13177	0	1.18283	1.86343	1.84902	1.49574	1.36797	1.67716	1.51379	1.80768	2.04616	2.04074	1.64692	2.2203	2.07297	2.11776	2.88842	2.47684	2.16875	2.08209	1.71989	1.93674	3.90538	3.95083	3.76171
CC2G_001065	5.95865	5.19116	5.36638	2.94136	3.1079	3.2594	3.49154	3.02057	3.00773	3.53163	3.57473	3.70086	3.76761	3.53762	3.69859	4.74619	4.5159	4.75774	5.12355	4.74277	4.36314	4.1409	3.88408	3.95067	5.57025	5.5302	5.41425
CC2G_001066	8.90998	7.85128	7.92661	8.84657	9.14528	9.51295	8.32695	8.44626	8.36195	7.60935	7.67143	7.54445	7.70375	7.47723	7.60889	8.85016	8.76827	8.77554	7.55579	7.52147	7.35488	7.41041	7.32177	7.34748	8.80602	8.60436	8.8006
CC2G_001067	5.05996	3.95147	4.27669	9.7697	10.1424	10.6187	8.12909	8.21598	9.16254	8.45464	8.53027	8.42305	8.17202	8.21656	8.38245	9.31911	9.1649	9.18411	7.96993	8.26491	8.52059	8.02058	8.07459	8.24113	9.52095	9.43004	9.64372
CC2G_001068	8.66972	8.95203	9.05967	7.39261	7.35392	7.71506	9.66104	9.6116	6.90703	7.10167	6.95563	6.72241	7.15731	7.13287	7.07071	7.11479	7.41015	7.40525	6.69146	6.48616	6.60559	6.77237	6.61532	6.7747	5.9233	5.82608	5.94227
CC2G_001069	9.8005	9.93455	10.0486	7.58059	8.24163	8.24381	7.16644	7.38477	7.60869	7.23734	7.0454	7.21112	6.79892	6.86524	7.16928	8.2642	8.35597	8.74517	7.78409	7.7508	7.68774	6.25968	6.37928	6.32544	5.45832	5.72486	5.66819
CC2G_001070	4.3829	2.37308	3.15762	4.27603	4.18173	3.04553	4.43682	4.62416	4.92228	4.53559	4.77113	4.82699	4.87623	4.67315	4.82901	5.40991	5.31388	5.52472	5.46892	5.43386	5.24139	5.4724	5.30946	5.49101	6.718	6.77384	6.76563
CC2G_001071	0	0.974322	0.397192	0	0	1.21373	3.40558	3.02057	1.95408	1.50765	1.20778	1.0877	0.959017	1.44907	1.0667	0.523062	1.86118	2.06115	2.02987	2.50891	2.57365	4.46666	4.66207	4.42934	3.13796	2.62257	3.20275
CC2G_001072	0.279274	0	0	0	0	0	0	0	1.28531	0.278232	0.218754	0.248	0.200442	0.230242	0.230002	1.62094	1.56697	1.22409	1.16693	1.2862	1.22667	2.23408	2.16945	1.87511	0.685278	0.490143	0
CC2G_001073	6.942	6.33539	6.40112	5.72193	6.0396	5.63855	6.13865	6.17621	6.45167	6.2183	6.36123	6.24719	6.20528	5.92764	6.2525	6.39752	6.28149	6.48764	6.14564	6.11508	5.85919	6.16827	6.20293	6.22918	5.6097	5.58291	5.61251
CC2G_001074	6.6158	6.87935	6.88978	5.76688	5.62258	5.94698	6.53765	6.35598	5.07157	5.08014	5.20598	5.19274	5.35738	5.31112	5.44544	5.41915	5.28936	4.98269	5.6587	5.6031	5.50658	5.51754	5.63163	5.33381	6.49303	6.23345	6.20258
CC2G_001075	9.79998	9.95759	10.0512	9.36438	9.37515	9.88418	10.77	10.837	8.93997	9.27128	9.29593	9.10095	9.26313	9.31986	9.64213	8.76033	8.67554	8.77646	8.04409	7.96677	7.8745	9.01796	9.08004	9.13315	9.58135	9.71373	9.5364
CC2G_001076	6.87795	7.52084	7.52631	8.3811	8.65699	8.94966	8.96309	8.60304	7.06404	6.03233	6.02276	5.91034	6.599	6.6666	6.37071	6.31678	6.12602	5.65156	5.66714	5.53854	5.29804	5.95098	5.97593	5.89972	5.71086	5.68571	5.43468
CC2G_001077	7.00933	8.53077	8.35024	6.63735	6.52074	6.54466	8.52086	8.23829	5.48204	6.20033	5.97098	5.86154	6.16489	6.19855	6.13205	4.39558	4.40291	4.35645	5.58397	5.53854	5.28301	5.97005	6.02885	5.72151	6.93903	6.7264	6.91482
CC2G_001078	3.68414	4.08047	4.06079	4.50553	4.02171	4.07317	5.28169	4.61445	4.04643	4.28056	4.23203	4.29045	4.33114	4.24757	4.43848	3.36265	3.89097	3.9203	4.0003	3.87163	3.98196	4.16947	4.23108	4.10181	3.01676	3.24736	2.71649
CC2G_001079	6.79713	7.32064	7.20541	4.87754	4.65157	5.51911	7.03841	6.97641	5.33053	5.49737	5.23554	5.12973	5.70526	5.32156	5.61274	5.22842	5.68534	5.64996	5.61398	5.33448	5.1801	5.29144	5.04703	5.27736	5.43147	5.63962	5.31125
CC2G_001080	4.84629	6.17128	6.15065	5.89389	5.92363	6.09355	6.87608	6.58459	5.28339	4.87931	5.15827	5.04484	5.43399	5.26858	5.06828	5.10791	4.81231	4.79293	5.34599	4.97285	4.99214	5.43367	5.27995	5.11578	4.99581	5.15348	4.9632
CC2G_001081	8.61144	9.67019	9.72392	9.58751	9.93245	9.87711	8.71149	8.66022	8.50237	7.67238	7.39608	8.08725	7.52927	8.43498	8.03428	9.52535	9.32519	9.00499	8.22882	8.62042	8.8212	7.45557	7.5662	7.63537	6.51238	6.52722	6.3316
CC2G_001082	7.41435	7.34652	7.46423	7.27306	7.16253	7.22331	9.34505	9.20428	6.83802	7.65168	7.3247	7.20135	7.39305	7.58733	7.45822	7.32746	7.50026	7.42921	7.12074	6.8632	7.02512	6.35707	6.35522	6.27762	5.72198	5.85157	5.60352
CC2G_001083	8.15732	8.30882	8.35513	7.56794	7.77793	8.19918	7.62328	7.58826	7.18155	7.29319	7.03102	6.99127	7.08894	7.23306	7.15943	7.12104	7.13298	7.24347	6.90711	6.83739	6.95231	7.09197	7.18346	7.05847	7.55974	7.42403	7.5432
CC2G_001085	2.33859	2.65671	3.10545	4.27603	5.35797	5.22043	4.79903	4.84788	4.15517	4.09549	3.93536	3.74862	4.24304	4.41685	3.97187	5.08487	5.03299	4.84416	4.58194	4.22045	3.80681	3.10193	2.95748	3.04575	2.05012	2.04807	1.90138
CC2G_001086	5.96607	5.49363	5.44721	5.67554	5.74722	5.88391	6.13865	6.18935	5.57633	5.91687	5.60906	5.4983	5.79578	5.94395	5.8314	5.64697	5.73805	5.62577	5.71353	5.59378	5.75563	4.90359	4.82565	4.88773	5.30775	5.34156	5.4975
CC2G_001087	6.63917	6.708	6.87233	7.20935	7.20662	7.40836	5.76859	5.62878	7.221	7.00065	7.10495	7.05641	6.91513	6.97581	6.98604	7.56281	7.47058	7.25298	7.26899	7.37312	7.52383	6.81066	6.79445	6.8986	7.6665	7.67314	7.99329
CC2G_001089	8.24575	7.6718	7.78244	7.28856	7.11705	7.39145	9.22587	9.26101	6.61712	6.98942	6.65485	6.4913	6.9813	7.19211	6.88136	6.7411	7.04315	6.86299	6.32708	6.22292	6.39896	6.86042	6.76585	6.86267	6.67143	6.92319	6.64958
CC2G_001090	5.71646	4.3769	4.30009	7.63008	7.58144	7.74199	9.18453	9.17773	7.23759	7.44355	7.44931	7.3122	7.28414	7.33811	7.46247	5.97727	6.39418	6.27075	6.24374	6.24093	6.16124	7.48618	7.86875	7.54633	7.84306	7.86812	7.6785
CC2G_001091	1.99645	1.77053	1.61359	3.46232	2.7476	3.61053	0.858618	2.31356	2.69196	2.20665	2.50933	2.78175	2.3146	2.26505	2.19281	2.72823	2.64756	2.77512	2.34818	2.30486	2.7713	4.45123	4.73535	4.44002	4.16374	4.26351	3.92459
CC2G_001092	3.76569	2.5812	2.00394	4.14595	4.07705	4.62927	6.38597	6.46539	4.25629	4.94388	4.53683	4.50426	4.76464	4.99356	4.90032	4.6076	4.68385	4.69711	5.3648	4.83103	5.23471	4.83093	4.86309	4.58821	3.95335	4.22501	4.00872
CC2G_001093	2.8033	1.0878	1.68643	5.30077	5.2417	5.16845	6.80651	6.65734	5.00855	5.58734	5.27674	5.01446	5.0572	5.39261	5.20975	4.85911	5.21321	5.14584	5.22082	4.97859	5.19395	5.28928	5.18079	5.01223	4.86647	5.06034	4.81009
CC2G_001094	13.3185	13.3479	13.4704	12.9212	12.6405	12.9753	13.9024	14.0651	11.7682	12.2262	11.8993	11.8315	11.8863	12.0467	12.0261	12.1998	12.561	12.3649	11.4364	11.5138	11.7207	11.3418	11.3461	11.3863	10.4098	10.8182	10.6183
CC2G_001095	7.99045	8.0998	8.21367	5.67554	5.50645	5.73104	6.28426	6.47883	6.32548	7.00304	7.03042	6.6887	6.67111	6.87945	6.76237	6.67554	6.57601	6.50984	6.628	6.66756	6.69106	7.34408	7.41732	7.44879	9.12658	8.76828	9.21859
CC2G_001096	8.9745	9.43173	9.44503	8.62644	8.42609	8.62026	11.4222	11.4014	7.58621	8.7761	8.54342	8.55576	8.70871	8.75843	8.71666	7.99501	8.19607	7.79375	8.36453	8.36082	8.36329	8.49772	8.46834	8.44288	7.74697	7.89656	7.56575
CC2G_001097	6.918	7.07955	7.04327	6.5881	6.74232	6.22659	6.60911	6.56959	6.32548	6.8483	6.52664	6.34253	6.63839	6.82104	6.65677	6.93068	7.00655	6.93827	7.03852	6.98647	7.08145	6.35397	6.21635	6.15008	6.43339	6.28488	6.30781
CC2G_001098	4.87282	4.23628	4.34578	6.45709	6.43862	6.49277	6.28426	6.32058	5.31499	5.20464	4.92159	4.45576	5.2409	5.46222	5.1618	4.78673	4.62348	4.38748	4.31595	4.1098	4.07966	3.87209	3.56556	3.85814	6.01432	5.61005	5.8616
CC2G_001099	9.06329	8.37739	8.38826	9.79975	9.23773	9.64244	12.3678	12.2897	8.61243	9.37891	9.18085	9.20747	9.37401	9.38926	9.36713	9.09405	9.26876	9.14166	8.89322	8.76498	8.70896	8.42282	8.46413	8.59159	6.45354	6.97167	6.24367
CC2G_001100	8.43748	8.07593	8.08907	6.66135	7.11705	7.12446	6.50702	6.76002	7.41209	7.59461	7.85165	7.82023	7.69651	7.65206	7.78201	7.91401	7.80732	7.86748	7.87727	7.83661	7.85902	7.53319	7.64727	7.67735	9.0528	8.2827	8.83365
CC2G_001101	3.50574	5.51914	5.21457	5.57802	4.37075	4.77543	6.9116	6.57711	4.35079	4.60448	4.33315	4.12455	4.70818	4.71177	4.08394	3.57592	3.88163	3.52627	4.04245	3.82144	3.85409	4.50079	4.46261	4.41858	3.89559	3.95083	3.339
CC2G_001103	6.1999	7.03603	6.94464	7.07282	6.88868	6.8136	8.39754	8.19006	5.96951	6.20588	6.02155	5.63344	6.20625	6.12176	6.10091	4.92804	5.14458	5.01534	5.22082	4.96421	4.75121	6.32357	6.07007	6.05137	6.91379	6.84792	6.88298
CC2G_001104	6.56788	7.89773	8.0194	5.03282	5.60387	5.73104	7.03841	7.05749	5.01498	5.18227	5.16047	4.99196	5.16701	5.19098	5.40089	4.50375	4.44156	4.42909	4.53104	4.37198	4.20347	5.61077	5.64492	5.61086	5.24359	5.26773	5.19635
CC2G_001105	3.45044	3.53753	3.97616	6.92201	6.56979	6.58488	6.23837	6.25333	6.02788	6.38668	6.39436	6.09189	6.34056	6.42363	6.43168	4.75205	5.16782	5.13216	4.93506	4.88089	4.74495	5.65521	5.54212	5.61086	4.7354	4.87882	4.59105
CC2G_001106	9.94129	9.31677	9.41017	9.47688	8.98997	9.36059	11.9959	11.9838	8.36824	9.07473	8.86719	8.79791	9.03552	9.03839	9.03216	8.86747	8.97277	8.91585	8.48547	8.54656	8.46219	8.49749	8.33068	8.39885	6.57045	7.17215	6.42132
CC2G_001107	4.57613	4.1343	3.49833	0	1.82392	2.65018	1.97375	2.21418	3.81555	4.65408	5.01709	5.52008	4.55804	4.44768	5.01272	4.36912	4.21858	4.58111	5.10627	5.11506	5.46722	8.44636	8.59271	8.57997	9.18426	9.16616	9.34153
CC2G_001108	0.971684	0.567895	0.841857	1.41702	0.709386	0.730907	0.573356	0.412428	0	0.773174	0.773565	1.00023	1.13251	0.603213	1.25259	0.906124	1.19697	1.32371	0.724492	0.459801	0.432569	1.19767	1.10236	0.971286	1.0096	0.933809	1.14787
CC2G_001109	3.78817	4.49476	4.55477	5.10462	4.75699	4.55023	4.98836	5.07731	5.7559	6.03389	6.3224	6.0503	6.38669	5.81095	6.21047	6.12911	5.95621	6.4578	4.82165	4.71555	4.90222	5.82196	6.09207	5.8161	5.28168	5.14525	5.69947
CC2G_001110	6.67731	7.26893	7.28233	5.41814	5.48615	5.43361	8.0831	7.94183	5.84878	5.83143	5.79639	5.68344	5.99436	5.6726	6.03399	6.10183	6.12899	6.34969	5.82789	5.39793	5.52496	5.99288	6.0945	5.96773	7.51249	7.30451	7.6343
CC2G_001111	7.16451	7.17414	7.16456	6.902	7.35392	7.33951	7.87093	7.67842	7.03903	7.42938	7.30492	7.29047	7.38963	7.46079	7.59606	6.83314	6.91165	6.79879	6.9651	6.81912	6.78706	6.93234	6.8735	6.95368	6.06543	6.29049	6.11671
CC2G_001112	1.8757	1.19301	1.07676	3.46232	2.44513	3.04553	6.26608	6.18935	4.38096	4.91026	4.85786	4.88614	5.25599	5.37668	5.91505	3.08469	3.32885	4.1593	4.52362	4.41914	4.22611	6.0297	5.87663	6.03737	3.29516	3.57577	3.69555
CC2G_001113	6.96931	6.63752	6.6261	5.47342	4.91719	5.14174	5.91189	6.09123	5.40093	5.62928	5.0316	5.12715	5.13677	5.58691	5.24085	6.45165	6.4964	6.37022	5.92262	6.0888	6.33584	5.12396	5.05452	4.98818	6.49303	6.76582	6.87926
CC2G_001114	6.84884	7.26893	7.28673	7.30389	7.52784	7.61181	6.86001	6.76222	6.52556	5.8634	5.6267	5.72496	5.62765	5.82569	5.70486	6.99078	6.91451	6.99855	6.11264	6.34563	6.28499	5.82345	5.61315	5.6077	8.31094	8.19081	8.4202
CC2G_001115	7.13631	7.28984	7.25265	6.902	6.75933	6.74428	8.62676	8.49604	6.46347	6.87817	6.63677	6.64611	6.77228	6.87023	6.94683	6.29386	6.70805	6.79518	6.01283	5.87631	5.81806	6.16236	6.21746	5.99816	4.52926	4.65964	4.41037
CC2G_001116	2.56375	2.95476	2.63913	2.58761	0	1.57485	1.91274	1.21642	3.73997	2.78344	2.70314	3.50026	3.3563	3.68076	2.87526	1.81261	1.47057	1.32371	2.72981	1.93174	2.88947	4.29146	3.99202	3.83135	4.0536	3.37942	3.40948
CC2G_001117	3.96629	3.96639	3.41505	4.60791	3.90423	4.84331	4.22728	4.22531	3.67651	2.52368	2.60302	2.88304	2.84011	3.30485	3.2693	3.96713	4.02852	4.17272	3.47005	3.95546	4.12373	3.95648	4.16343	4.28278	5.16428	4.89363	5.30017
CC2G_001118	9.64427	9.43341	9.46166	9.63979	9.08582	9.3475	12.3171	12.1768	8.27959	9.20991	8.99073	8.9902	9.12451	9.1379	9.13361	8.52345	8.80687	8.42712	8.408	8.57476	8.5247	8.37046	8.49105	8.42283	7.37305	7.94888	7.24186
CC2G_001119	4.04307	3.59625	3.07863	5.30077	5.35797	5.56003	6.21329	6.13264	4.8665	4.85477	4.65404	4.46804	4.76991	4.58576	4.57027	4.2079	4.16953	4.13665	4.63799	4.54045	4.27903	5.22948	5.07675	5.1552	7.68934	7.64717	7.5788
CC2G_001120	4.80279	3.96639	3.61488	7.03657	7.1302	7.21693	4.97349	4.86436	6.60652	5.84038	6.28047	6.41619	6.19944	6.14547	6.22721	6.85441	6.65147	6.7384	6.07252	6.14216	6.17527	6.51846	6.33691	6.47488	8.90814	8.90788	8.85812
CC2G_001121	7.44474	6.9875	7.02232	5.10462	6.10762	6.5033	8.12321	8.05835	6.36376	6.21141	6.30756	6.06654	6.56609	6.09523	6.34845	6.39752	6.404	6.64919	6.37219	5.89766	5.99588	6.80384	6.75669	6.80874	7.5828	7.52414	7.75222
CC2G_001122	5.9387	6.88328	6.78588	5.17301	4.45671	4.42291	5.36377	5.69479	4.83052	4.80807	4.87137	4.83333	4.98661	4.95652	4.84065	5.40619	5.49171	5.54894	5.01132	4.87167	5.01572	5.66361	5.53857	5.50633	4.97737	4.62458	4.99564
CC2G_001123	2.2113	1.55062	1.45585	4.50553	4.37075	3.61053	3.36059	3.28828	4.1317	3.57519	3.30683	3.02277	3.26232	3.78101	3.63311	3.07537	3.09828	3.34054	3.71123	3.76944	4.02907	6.56669	6.2439	6.42288	5.80539	5.35588	5.67679
CC2G_001124	5.52564	7.4215	7.07583	6.94175	7.00738	7.07591	6.57505	6.39622	6.18719	6.91339	6.7123	6.61424	6.71202	6.82177	6.57631	5.32202	5.44491	5.49475	6.06359	5.93797	5.77725	6.00614	5.83084	5.72297	5.91848	5.31615	5.47467
CC2G_001125	6.16168	7.25837	7.28965	3.84426	3.48049	3.95541	4.49	4.40506	3.95579	4.18257	3.89887	3.93116	3.83947	4.03053	4.28918	3.80744	3.58627	3.77534	4.27234	4.15102	3.94968	4.59155	4.47754	4.41498	3.71811	3.81227	3.91493
CC2G_001126	3.85358	4.97217	4.86828	6.0835	6.01147	5.99254	8.19463	7.82773	5.717	6.13778	5.94948	5.90282	5.99436	5.95472	6.19012	5.46625	5.65961	5.71562	5.71516	5.57686	5.63901	6.39487	6.13744	6.09595	4.41741	4.90341	4.09679
CC2G_001127	8.95507	9.09251	9.10272	8.86218	8.36348	8.70935	11.4705	11.2156	7.67005	8.29836	8.11965	8.11061	8.33338	8.29018	8.36969	7.67851	7.88388	7.73125	7.73875	7.64701	7.6585	7.524	7.55612	7.52935	6.14815	6.66733	5.83112
CC2G_001128	8.18775	7.45626	7.64186	6.7082	6.75085	6.68076	7.59928	7.36174	6.80131	6.36575	6.6673	6.55216	6.60564	6.51563	6.62091	7.50975	7.37978	7.23496	6.30453	6.55785	6.35855	6.14448	6.17457	6.18118	6.47999	6.44586	6.22033
CC2G_001129	5.73971	6.44861	6.50546	4.60791	4.65157	4.66722	6.20377	6.12582	4.29905	4.06526	3.75466	4.13998	4.32757	4.58229	3.96657	4.8317	4.87249	4.30456	4.08844	4.07274	4.26598	4.38375	4.41298	4.30632	3.93435	3.64739	3.71794
CC2G_001130	7.68154	8.10065	8.15952	7.30389	7.81908	7.67371	6.29625	6.37336	6.51426	5.15095	5.20598	5.86618	5.30395	5.49764	5.30323	6.96578	6.91279	6.78793	6.09522	6.35448	6.39697	5.20898	5.23891	5.21654	5.39024	4.9932	5.2043
CC2G_001131	3.59769	3.12395	2.5246	4.00298	2.99751	3.35552	4.25212	4.3476	3.62702	3.75263	3.78925	3.94879	4.2581	4.28647	4.3597	2.55131	2.61411	3.17256	3.78756	3.70861	3.76414	5.85604	5.9733	6.05832	4.71884	4.9932	4.77314
CC2G_001132	4.87807	6.25263	5.81523	4.14595	3.63598	3.15643	5.01037	5.09138	3.72436	3.71417	3.43612	3.50821	3.64118	3.95742	3.84459	3.50133	3.55723	3.55388	3.8182	3.7155	3.59356	4.10191	3.92823	3.75926	2.2782	2.49894	2.18469
CC2G_001133	6.25137	6.81694	6.97585	5.36065	5.19243	5.43361	5.98411	5.80564	4.94265	5.26174	5.00242	4.83964	5.04422	5.27719	5.06331	5.08719	4.99451	4.79583	5.20235	5.33	5.19624	5.75912	5.74087	5.76322	5.08896	5.03386	5.17223
CC2G_001134	6.60792	5.94524	6.1442	3.66589	4.65157	4.18203	4.69416	4.85614	5.25652	4.98645	5.2645	5.48426	5.48289	5.28788	5.10738	5.82573	5.52359	5.67847	5.76163	5.79575	5.70173	5.35501	5.49152	5.66041	5.02753	5.10766	4.81009
CC2G_001135	7.57649	8.22137	8.39439	6.5881	6.46997	6.98868	7.04375	7.07353	6.29939	6.84563	6.57617	6.52891	6.70448	6.74395	6.85647	7.0855	7.08851	7.16449	6.76016	6.78598	6.78554	7.35033	7.0537	7.17813	5.59163	5.77636	5.83112
CC2G_001136	7.11647	6.58292	6.72667	7.70128	7.5028	7.23599	8.56923	8.62981	7.56884	7.99821	7.76995	7.80459	7.842	8.02604	8.07492	7.83407	8.17782	8.1617	7.82201	7.80991	7.90919	7.74811	7.64644	7.72871	6.66424	6.81719	6.77767
CC2G_001137	1.49337	1.62771	1.75577	2.11792	1.5387	1.86343	1.3932	1.93087	4.23442	2.92485	2.99742	3.19023	3.54621	3.16341	3.2344	6.50988	6.76948	6.52475	5.80512	6.48213	6.17875	2.41994	2.03459	1.93674	1.39032	1.64342	2.01424
CC2G_001138	0.971684	0	0	3.22523	4.07705	4.01549	2.1427	0.994777	3.17777	3.06589	3.3305	3.65147	3.00989	3.55896	2.96315	1.79	1.67905	1.6901	2.27936	2.71539	2.66927	8.69485	8.62995	8.69998	7.92535	8.69482	8.01436
CC2G_001139	5.67785	5.21634	5.31562	5.47342	5.44467	5.78382	6.25997	6.32357	6.09616	6.4893	6.44495	6.40559	6.56458	6.51199	6.64851	6.00453	6.13096	5.98147	6.41092	6.36875	6.21542	6.40791	6.3287	6.36987	6.85312	6.82236	6.77767
CC2G_001140	6.12241	6.00425	5.85527	6.66135	5.99719	6.14825	6.21012	6.42428	6.13208	5.95034	5.97474	6.02004	6.10054	6.08055	6.19467	6.42346	6.57312	6.46236	6.39677	6.4234	6.46516	5.28928	5.46554	5.42623	4.57292	5.13698	4.71311
CC2G_001141	5.9905	6.37785	6.32332	6.92201	7.00738	7.11076	8.50544	8.60243	6.41811	6.7309	6.7123	6.65956	6.73508	6.88931	7.19503	5.60872	5.73287	5.88284	6.19202	6.04709	5.97465	6.9714	7.09847	6.99591	6.34623	6.7537	6.28924
CC2G_001142	1.59886	2.89364	2.96611	7.83394	8.16708	8.86442	5.72932	5.6336	7.55898	6.45123	6.24665	5.92823	7.01216	7.01043	7.03882	6.44984	6.57674	6.34475	6.59032	6.49219	6.26217	7.70444	7.50009	7.35502	9.71921	9.44247	9.70578
CC2G_001143	7.91968	7.41472	7.48224	8.01252	8.25068	8.34094	7.01864	6.84761	8.15564	6.7076	6.59094	7.03594	6.94161	7.16917	6.93261	9.58105	9.5097	9.16828	8.73536	8.74912	9.05364	7.97309	7.94157	7.99749	8.78728	8.61296	9.04295
CC2G_001144	7.19111	6.37506	6.45163	6.37237	6.13395	5.94698	7.30645	7.35446	7.19576	7.08293	7.28334	7.27948	7.11864	7.12752	7.64047	7.34938	7.39791	7.57786	6.78675	6.96857	6.74692	6.92259	6.96906	7.03106	6.64392	7.03535	6.80799
CC2G_001145	1.12082	1.19301	1.68643	0	0	0.730907	0	0	0.364536	0.278232	0.218754	0.322019	0.261511	0.230242	0.299184	0.218937	0.416963	0.415779	0.439156	0.248141	0.302278	0.556239	0.600438	0.400752	1.0096	0.933809	1.21238
CC2G_001146	7.32012	7.68088	7.82743	5.76688	5.90845	5.94698	5.86031	5.7312	6.03739	5.92867	6.02276	5.95465	5.79836	5.84464	6.04661	5.99097	6.00757	6.12647	5.86946	5.80223	6.00377	6.38779	6.42043	6.47574	7.28861	7.37389	7.49782
CC2G_001147	5.9905	5.96394	5.79889	4.39534	3.96417	4.01549	4.30056	4.35928	4.79361	4.52229	4.45303	4.61882	4.4831	4.55777	4.49486	5.10791	5.05808	4.99785	5.18599	5.18123	5.06678	4.51199	4.05311	4.27087	4.25844	4.48819	4.54796
CC2G_001148	8.99276	9.425	9.55214	10.4759	10.3637	11.3499	7.01683	7.10682	9.36605	6.30494	6.58767	7.36841	7.65373	8.28672	6.69257	9.24882	9.04332	8.2814	8.09097	8.48617	8.22599	7.71901	7.91027	7.75211	6.28004	6.37906	6.9892
CC2G_001149	6.92815	7.237	6.9849	7.56794	7.43028	7.48473	8.70025	8.55244	6.50287	6.87904	6.76682	6.61608	6.92755	6.86881	6.87571	5.80191	5.78515	5.76667	6.07125	5.8717	5.78337	6.90641	6.9056	6.79356	7.16875	7.07377	6.86177
CC2G_001150	3.69607	3.27537	3.18301	4.27603	4.49785	4.23354	4.57122	4.1865	5.03409	4.71377	5.19527	5.11938	5.05073	4.97251	5.03824	4.77526	4.66491	4.81307	5.29679	5.30738	5.30869	5.7081	5.82647	5.73314	6.39047	5.94454	6.12302
CC2G_001151	7.24796	7.57902	7.47583	7.12555	6.75933	7.50059	8.78409	8.7627	6.61077	6.87556	6.54024	6.30423	6.67813	6.71414	6.67478	6.30586	6.594	6.54036	6.20831	5.99427	5.98398	5.62287	5.54921	5.53484	6.26681	6.12263	6.72889
CC2G_001152	8.03048	8.24603	8.16909	7.48966	7.51287	7.80292	6.03867	6.39054	7.27957	6.7193	6.57038	6.66756	6.51998	6.76016	6.59363	8.31556	8.17758	8.15016	7.32982	7.58959	7.70799	6.73543	6.78022	6.86795	7.98022	8.02872	8.04457
CC2G_001153	5.44305	5.4833	5.75723	4.39534	3.8417	3.61053	6.49145	6.49744	5.26733	5.52206	5.62511	5.84123	5.65635	5.76425	6.16022	5.69035	5.70798	5.84701	5.20467	5.39793	5.3443	6.5514	6.4902	6.71951	7.59117	7.39918	7.89416
CC2G_001154	6.53669	6.71022	6.58858	4.27603	5.16715	5.05851	4.68506	4.47113	4.95607	4.44457	4.56371	4.97772	4.34884	4.66005	4.48747	5.95585	5.48093	5.29649	5.50704	5.67021	5.75719	5.41788	5.45615	5.44932	4.99581	5.18189	5.11433
CC2G_001155	4.75224	3.8425	3.61488	2.11792	0	1.57485	0.982555	0.994777	2.19955	2.18432	2.61592	3.07722	2.62459	1.86914	2.22872	3.58252	3.0153	3.46939	4.94621	5.1046	5.39313	6.75519	6.43102	6.61578	5.46164	5.78697	5.49426
CC2G_001156	5.85599	5.70849	5.74022	6.66135	7.2494	7.15817	8.29144	8.313	6.58508	7.57864	6.94928	6.91559	6.87417	7.41862	7.25992	6.33447	6.97999	6.74515	6.48919	6.35889	6.81346	6.46569	6.38622	6.24144	6.9755	6.90748	6.78829
CC2G_001157	6.14653	5.25329	5.56296	4.39534	5.46556	5.67626	5.52534	5.55961	6.20978	6.38301	6.48418	6.37332	6.37379	6.12653	6.31334	6.4161	6.37849	6.43848	6.53142	6.5434	6.60818	6.25968	6.0007	6.15441	6.3747	6.11423	6.25328
CC2G_001158	4.97923	5.86791	5.71433	6.37237	6.42802	6.54466	7.69412	7.47743	5.54113	5.32435	5.37298	5.22203	5.90268	5.75195	5.92466	3.98715	4.21858	4.09496	4.69195	4.56735	4.44647	5.69014	5.75932	5.695	5.411	5.4755	5.40048
CC2G_001159	5.87974	5.92248	5.86315	5.6276	5.03366	4.18203	7.14007	6.90251	5.81602	5.89469	6.07392	6.19151	6.05167	6.08055	6.68613	5.95331	6.09806	6.50808	5.657	5.69656	5.55567	6.20093	6.03265	6.22507	5.30405	5.76567	4.9632
CC2G_001160	9.12915	9.33448	9.1602	9.38975	8.78713	9.10464	11.844	11.8251	8.0256	8.80977	8.62844	8.64002	8.92941	8.94507	8.9039	8.13138	8.43113	8.06184	8.4919	8.35312	8.23411	8.75519	8.81236	8.67984	8.63306	8.59382	8.25155
CC2G_001161	8.48642	8.49264	8.63652	7.68966	7.89033	8.00538	7.19875	7.34127	7.61611	7.51184	7.59693	7.64205	7.50422	7.4763	7.75725	8.07083	8.00927	8.08273	7.6111	7.71215	7.62822	7.69219	7.6787	7.75425	8.68691	8.51704	8.70856
CC2G_001162	6.86743	6.81899	6.75022	4.79314	5.00541	5.58007	6.41376	6.4815	5.51416	5.16812	5.12255	4.96623	5.17696	5.26426	4.99719	5.38561	5.2427	5.36435	5.29679	5.16371	5.07428	5.40792	5.33634	5.07296	7.03691	6.96467	7.28655
CC2G_001163	2.84678	2.79682	2.99507	3.66589	3.8417	2.49	5.94655	5.47627	3.32987	4.21598	4.0203	3.74189	4.11238	4.19856	4.20154	3.19206	3.55723	3.42522	4.16197	3.69474	3.84241	5.12881	5.02178	4.97844	5.30035	5.0734	5.09307
CC2G_001164	6.40107	7.44299	7.36924	6.63735	6.46997	7.01098	7.88291	7.69002	5.76355	5.48372	5.35	5.52205	5.93818	6.03939	5.49235	5.63909	5.73027	5.40472	5.94501	5.76288	5.47669	5.66361	5.84818	5.6077	5.29291	5.46232	5.40048
CC2G_001165	7.86983	6.84344	6.80849	7.71282	8.09519	7.71506	7.63041	7.67609	6.60439	7.15	6.56374	6.60315	6.49078	6.99028	6.76848	7.10796	7.32483	6.9853	6.93535	6.97504	7.15467	5.69014	5.6548	5.77029	6.77652	6.88172	6.75754
CC2G_001166	5.98565	6.71243	6.75869	4.39534	4.45671	3.35552	3.49154	3.70915	3.85907	4.01553	4.21517	4.30877	4.52105	4.22994	4.71654	3.13937	3.19949	3.19026	3.55258	3.5711	3.7009	6.05289	6.1197	6.20642	6.71662	7.08241	6.53445
CC2G_001167	4.57613	3.671	3.41505	4.00298	3.30619	3.82717	5.24503	5.14633	6.17863	6.96179	6.64466	7.01656	5.91104	6.00353	5.87029	6.05282	6.20866	6.48943	6.08895	6.22895	6.26327	4.1409	4.2702	4.29852	4.57292	4.42845	4.47753
CC2G_001168	5.33651	4.7227	4.96661	5.89389	6.06719	6.00741	5.0814	4.75369	5.71306	5.61056	5.82028	6.10243	5.72978	5.55363	5.82262	5.97226	5.9018	5.83016	5.96979	6.22775	6.09883	5.66862	5.89621	5.76887	6.15637	6.15985	5.94938
CC2G_001169	8.09839	7.17253	7.31428	7.58059	8.04056	8.01277	5.7469	5.73568	7.18725	6.08602	6.42126	6.75367	6.38584	6.33055	6.24704	8.18436	8.00631	7.71948	6.87977	7.36384	7.1158	7.4449	7.68756	7.63924	7.74969	7.78719	7.77309
CC2G_001170	2.07168	2.28062	2.44286	2.11792	2.7476	2.30978	1.78237	0	4.10785	5.0152	4.82212	4.61882	4.25059	4.17572	4.76319	2.34962	2.25761	2.38706	2.31418	1.90788	2.53065	3.09202	2.98909	3.19613	4.24309	3.81227	4.32543
CC2G_001171	2.24419	5.40334	5.25704	3.46232	1.5387	1.86343	1.09668	2.10743	6.78635	5.30378	5.17144	5.69045	4.34531	4.2121	4.36777	6.49947	6.71201	6.92577	6.95617	7.13962	7.3768	4.2784	4.28725	4.35604	5.02753	5.50472	5.76007
CC2G_001172	6.2351	5.77777	5.93964	6.15288	6.09427	5.69475	6.41926	6.45181	5.32537	4.7897	4.85242	5.12198	4.99338	5.32779	5.10497	6.11212	5.9484	6.11492	5.37308	5.43595	5.34016	5.72584	5.68246	5.70537	4.31829	4.44864	4.26589
CC2G_001173	6.36414	7.58386	7.50381	7.19298	6.60787	6.28878	8.73702	8.29639	6.02151	6.84919	6.48153	6.52499	6.63695	6.94372	6.59707	6.24586	6.41941	6.3398	6.6605	6.54727	6.67881	6.18119	6.13391	6.05716	6.11267	6.25463	6.04325
CC2G_001174	5.38524	5.14601	5.36638	7.71282	7.29679	6.6992	8.62438	8.79423	6.96295	8.24305	7.98908	8.02663	7.69548	8.07747	7.72068	7.54647	8.06629	7.67734	7.46234	7.49119	7.81602	7.93026	7.92737	8.02879	5.96603	6.56624	6.08691
CC2G_001175	7.57649	8.12329	8.14425	5.47342	5.56568	5.94698	5.36377	5.46009	5.50962	5.41105	5.19097	5.37113	5.5548	5.73642	5.60593	5.82016	5.74708	5.42916	5.6502	5.43386	5.27217	6.94341	6.95445	6.98986	6.70265	6.68019	6.57947
CC2G_001176	6.91672	6.78784	7.02934	5.76688	6.56979	6.60457	6.6163	6.6738	5.717	5.32945	5.43436	5.63526	5.62619	5.5817	5.68238	6.10527	6.00003	6.0129	5.30546	5.57118	5.59794	5.01273	5.10347	5.13781	4.25844	4.73828	4.46435
CC2G_001177	4.50327	4.95731	4.76276	4.00298	3.30619	4.01549	4.61017	4.51355	3.69264	4.0895	3.98593	3.90129	3.95027	3.98396	3.86184	3.65937	3.81939	3.95179	4.56758	4.24446	4.45032	3.36331	3.41855	3.46373	2.71665	2.80066	2.96136
CC2G_001178	6.95199	6.28571	6.43851	6.79756	6.93435	7.27338	7.16808	7.31753	6.66082	6.84563	6.79119	6.80861	7.07571	7.37467	7.2534	7.71684	7.70114	7.68984	7.42499	7.53516	7.46746	7.40641	7.38452	7.42479	7.73604	7.63841	7.57727
CC2G_001179	1.49337	0.851145	1.07676	4.27603	3.70786	4.33133	5.56058	5.55454	4.90162	4.39194	4.64778	4.54347	5.03769	4.62	5.00238	3.52891	3.46642	3.93087	3.78135	3.6306	3.30971	4.22949	4.41686	4.47506	3.56595	4.11141	3.56578
CC2G_001180	9.66378	9.37801	9.44535	10.835	10.9824	11.5796	12.7867	12.7861	10.3291	10.2426	10.1307	10.0163	10.0454	10.2024	10.2412	9.31948	9.38126	9.45943	9.41179	9.31054	9.15931	10.4229	10.5678	10.4445	10.6235	10.749	10.6194
CC2G_001181	6.91545	6.46446	6.6739	5.85279	6.08079	6.14825	5.78995	5.95163	6.21258	6.01345	5.96217	6.01447	5.78412	5.89445	6.01612	6.56419	6.5438	6.62417	6.55436	6.57877	6.76017	7.04005	7.01903	7.15292	6.8881	6.99244	7.23023
CC2G_001182	7.22137	7.62204	7.57748	7.0181	6.78448	6.51375	9.30294	8.99284	6.05932	7.02912	6.66497	6.63617	6.70654	6.83714	6.70537	5.99715	6.16119	5.90579	5.99012	5.79575	6.07658	6.3172	6.17228	6.15224	5.18452	5.55214	5.43805
CC2G_001183	6.08885	5.13945	5.26895	4.14595	4.82322	5.08679	7.25668	7.16453	5.17277	5.36215	5.43981	5.23646	5.70526	5.34017	5.43779	5.22842	5.35327	5.37018	5.19068	4.94382	4.71645	5.07697	5.27782	5.32998	3.33916	3.33673	3.15432
CC2G_001184	7.3563	6.74523	6.76501	9.94617	10.1351	10.5391	9.02115	9.03759	9.26553	9.14995	9.1081	9.18471	8.87792	8.86791	9.02994	10.4339	10.137	10.3535	8.78003	8.96443	9.15209	7.5115	7.52006	7.74925	7.52683	7.34904	7.3711
CC2G_001185	1.64885	3.01339	3.13177	5.89389	7.08367	6.69001	3.93679	4.00513	5.84878	4.81172	4.6634	4.82062	4.25435	4.38932	4.01364	8.29839	8.12981	8.30114	5.44162	5.77941	6.1159	4.42778	4.64564	4.75146	4.28118	4.27108	4.05343
CC2G_001186	3.86419	3.43402	3.82305	3.46232	2.7476	3.15643	5.06747	5.21863	4.62738	4.69415	4.68498	4.52791	4.74071	4.43619	4.59799	4.47214	4.68653	4.5878	4.80338	4.54819	4.72602	5.08199	5.01923	5.017	4.28118	4.52034	4.18783
CC2G_001187	7.09634	7.21998	7.11429	6.66135	6.30594	6.38302	8.69912	8.37902	5.39109	6.18494	6.08324	5.72155	6.27451	6.40313	6.28378	4.19074	4.32923	4.41786	5.31839	4.97285	4.83312	6.34773	6.53104	6.26366	6.94498	7.01744	6.99837
CC2G_001188	6.61265	6.77519	6.57426	5.72193	5.67733	5.85132	6.65407	6.81406	5.90523	6.34953	6.30557	6.28932	6.44791	6.30025	6.47344	5.53585	5.59249	5.62414	6.16365	5.87015	5.91041	6.62544	6.6077	6.67801	7.63228	7.7612	7.61579
CC2G_001189	9.23419	9.24058	9.13643	9.13073	8.59673	8.69335	12.0771	11.894	7.79482	8.71923	8.5885	8.57173	8.84961	8.7847	8.74134	7.95651	8.20195	7.91883	8.34992	8.19764	8.15285	8.43366	8.48852	8.38602	6.74279	7.269	6.4896
CC2G_001190	7.24085	6.63052	6.71366	6.88171	6.67217	6.98868	8.59495	8.48075	6.23478	6.65985	6.51979	6.31786	6.59604	6.63514	6.89957	6.3227	6.18417	6.36438	5.96158	5.9187	5.6985	6.96937	7.0784	7.01865	7.42757	7.41037	7.56343
CC2G_001191	1.69717	1.77053	0.964086	4.14595	3.30619	3.15643	6.32873	6.2376	4.30955	4.70987	4.85242	5.06653	5.21412	5.21806	5.42043	3.78475	3.93679	3.72156	3.34091	3.22038	3.40802	5.80233	5.78205	5.87894	5.67124	5.73037	5.49102
CC2G_001192	7.45356	7.03956	7.46552	6.94175	6.93435	7.55727	8.02752	8.14439	6.74442	7.03225	6.42859	6.30195	6.44545	6.68532	6.78667	5.67192	6.56438	6.24133	5.71026	5.56357	5.95446	5.42973	5.57374	5.45986	6.75502	6.57698	7.38691
CC2G_001193	6.98277	6.57807	6.51049	6.94175	6.56979	6.56491	8.62735	8.63342	5.87375	5.60846	5.37298	5.22686	5.62765	5.76883	5.45873	5.10562	5.58962	5.25292	4.9655	4.41914	4.49575	4.86627	5.02432	4.95132	4.27364	4.20141	4.41037
CC2G_001194	9.08841	9.12776	9.25417	7.6422	8.07495	8.48336	6.86405	6.9688	7.68323	7.17782	7.12314	7.13424	7.08366	7.23306	7.28625	7.80441	7.80361	7.78103	7.52778	7.67333	7.74999	7.28056	7.27071	7.35784	7.9906	7.92686	7.82816
CC2G_001195	5.22146	4.36569	4.66702	5.57802	6.08079	5.61932	6.00618	6.14619	5.38117	5.72715	5.73415	5.69045	5.58049	5.69366	6.34231	5.29216	5.05808	5.06417	5.39967	5.27278	5.33808	6.47526	6.73976	6.66668	6.61885	6.78315	6.28174
CC2G_001196	9.79946	9.45042	9.45353	9.46328	8.93299	9.3475	12.151	12.1116	8.24515	9.20142	9.03523	9.04979	9.2082	9.14188	9.2252	8.38628	8.59209	8.35732	8.58351	8.64476	8.58242	8.64189	8.74665	8.74715	7.19493	7.58469	7.02218
CC2G_001197	4.89888	3.85858	3.55778	0	4.18173	2.49	5.11564	5.04874	7.94795	8.4622	8.7008	8.56912	8.67893	8.41659	8.40837	8.25055	8.03977	8.49035	8.98151	9.20179	9.01321	4.68026	4.40519	4.52942	7.87828	7.15587	7.23315
CC2G_001198	6.26546	6.26173	6.48774	8.26839	8.3297	8.73638	7.38014	7.39048	8.51092	8.18378	8.16973	8.20135	7.97814	7.90906	7.85095	9.46942	9.47363	9.55146	8.13637	8.32553	8.20421	6.10435	6.07867	6.09708	6.8881	7.01969	6.72475
CC2G_001199	3.00868	2.86209	2.44286	5.76688	6.01147	6.1616	5.49964	5.54435	6.88088	6.55713	6.47358	6.68169	6.32813	6.47224	6.42589	6.85577	7.11267	7.2801	6.92904	7.1274	7.19022	6.8836	7.02095	7.02517	7.62118	7.66238	7.42908
CC2G_001200	6.47568	6.84747	6.58858	7.86528	7.73126	8.37574	7.73655	7.53262	7.17295	6.74718	6.72277	6.73516	6.93225	6.97316	7.03249	7.22267	7.19557	7.09746	7.06815	6.99357	6.85835	6.60293	6.67403	6.5309	6.6628	6.7858	6.3833
CC2G_001201	2.14318	2.41717	2.21563	0	1.18283	1.86343	2.08855	1.99216	1.00442	1.23091	0.905518	1.0877	0.761768	1.25354	1.25259	0.98787	1.28463	1.04105	0.918025	0.644344	0.552061	0.91231	0.755516	1.01003	0	0.855326	0.773369
CC2G_001202	5.74833	5.27742	5.70997	5.47342	5.44467	5.59983	7.08236	6.98774	5.84878	6.18072	6.14573	6.11028	6.3002	6.21432	6.38471	5.90678	6.0849	5.9979	6.23695	5.99569	5.8836	6.0957	6.08965	6.03854	4.75719	4.99777	4.50997
CC2G_001203	3.53262	4.08047	4.52528	4.60791	4.91719	5.19467	7.73324	7.30399	5.00855	6.24282	5.80487	5.81903	5.72301	5.9574	5.96514	4.40676	4.97267	5.0277	5.1013	4.86239	5.18242	6.8648	6.73278	6.75843	6.00297	6.29235	5.79997
CC2G_001204	6.13562	4.58451	4.89926	9.42523	9.74015	10.1025	8.71037	8.88791	9.2259	9.1625	9.13845	9.16646	8.93249	8.87147	9.00783	9.91728	9.9497	10.077	9.04735	9.24423	9.33152	7.79087	7.72598	7.82114	8.52925	8.27519	8.43886
CC2G_001205	4.33789	4.99417	4.93707	5.47342	5.73006	5.19467	4.13679	4.01992	5.27806	4.91365	5.22294	5.22203	4.6118	4.59267	4.37179	5.52391	5.32426	5.47683	5.00067	5.21321	5.37906	5.67693	5.50434	5.6077	7.27262	6.29793	7.05553
CC2G_001206	7.01052	6.38064	6.53041	6.86113	6.88868	6.38302	7.92601	8.04576	7.30601	7.24275	7.44345	7.4604	7.49233	7.3936	7.55951	7.47739	7.4351	7.54684	7.11087	7.07816	6.93318	7.21012	7.19254	7.18872	6.22051	6.49523	6.28924
CC2G_001207	6.2145	6.61166	6.62841	5.10462	5.21727	5.74885	4.16323	4.11942	4.74804	4.7408	4.43858	4.34473	4.6944	4.99877	4.43464	5.48045	5.35833	5.14357	4.82165	4.76949	4.96548	4.72264	4.62567	4.48541	5.16019	5.25632	4.84611
CC2G_001208	4.05238	4.88065	4.39007	4.87754	5.03366	4.46662	5.58033	5.51332	4.20099	3.91061	4.04912	3.70086	4.24682	4.34496	4.14629	3.69023	3.69159	3.58768	4.01095	3.55583	3.68137	4.59857	4.5429	4.48884	4.06238	4.33755	4.00872
CC2G_001210	5.89017	5.24108	5.16445	4.95727	5.93864	5.73104	7.05615	7.17117	5.52771	5.93704	6.00815	5.71984	5.9966	5.96008	6.38072	4.96636	5.12294	5.28829	5.11617	4.94968	4.83312	6.43268	6.52386	6.48351	5.58859	5.57681	5.22008
CC2G_001211	8.23812	8.27102	8.32764	7.25739	7.25541	7.46332	6.48361	6.57961	6.70918	6.37933	6.45306	6.52988	6.55394	6.41975	6.61668	7.55403	7.45492	7.45919	6.82045	6.77283	6.95638	7.05926	7.06672	7.07169	8.41311	8.3188	8.44516
CC2G_001212	6.64688	6.28273	6.30897	5.85279	6.10762	6.23925	6.02432	6.19913	6.09919	5.28292	5.45783	5.31106	5.52397	5.53939	5.68076	5.60711	5.51153	5.57613	5.33967	5.40433	5.28732	5.97276	5.86247	5.78293	6.62627	6.74556	6.64958
CC2G_001213	5.53231	5.56397	5.72301	7.33407	7.92844	7.19111	6.21645	6.1224	6.8161	5.97981	5.97098	6.3591	5.90268	6.34085	5.93557	7.90746	7.75488	7.4024	6.70218	7.13577	7.2555	6.58183	6.51122	6.51331	8.26368	8.10278	8.12007
CC2G_001215	7.19532	7.91032	7.94435	5.17301	5.96822	5.69475	7.29304	6.9783	5.51869	5.1935	5.18881	4.86772	5.43233	5.25557	5.22316	5.84368	5.62923	5.46597	5.70043	5.35226	5.22125	5.01273	4.8574	4.9135	5.07602	4.97011	5.12274
CC2G_001216	1.95731	2.79682	3.13177	3.22523	4.53784	4.23354	2.47365	2.40654	3.84471	3.37283	2.90584	3.72152	2.74708	3.50867	2.97377	5.21363	4.97267	4.46226	4.32878	4.36761	4.45032	3.26083	3.21083	3.53852	1.49776	1.97572	1.82092
CC2G_001217	6.65608	7.85328	7.59059	7.19298	7.13672	7.20408	9.03821	8.81186	6.55452	6.5787	6.44042	6.27657	6.30565	6.27361	6.60477	6.1636	6.17177	6.49923	6.37838	6.36547	6.34621	6.16117	6.18371	6.12161	6.4849	6.29235	6.355
CC2G_001218	7.71492	7.66839	7.73494	7.40688	7.49774	7.35122	6.5173	6.73782	7.54239	7.42045	7.84721	7.63844	7.61951	7.27986	7.52111	7.7938	7.6563	7.64881	7.424	7.43493	7.46984	6.72183	6.66508	6.72752	7.95216	7.46177	7.7338
CC2G_001219	4.59538	4.70502	4.30009	4.14595	4.13034	3.15643	3.64949	3.31251	3.72436	3.51383	2.49543	3.64428	3.41123	4.68614	3.44748	6.0349	5.80134	4.92305	5.05057	5.23972	5.68222	3.03105	2.7761	2.62679	1.27423	1.27265	0.935008
CC2G_001220	3.54587	3.22665	3.43632	6.7082	7.91331	7.84492	3.90581	3.76289	6.05932	4.39194	4.18519	4.52007	4.68049	4.78302	4.94418	5.24306	5.12492	5.3087	5.26153	5.00974	5.02349	8.00778	7.8968	7.98721	12.0863	11.8934	12.1093
CC2G_001221	6.52837	6.32385	6.36274	5.85279	6.14694	6.53443	8.83585	8.82981	5.78627	6.15368	5.90681	5.80135	5.90148	5.85761	6.18442	5.7295	5.85483	6.16503	5.06853	4.90519	4.75744	4.63999	4.64564	4.60096	2.73872	2.64607	2.30789
CC2G_001222	7.0873	6.81899	6.70711	6.4294	6.71641	6.93524	9.23096	9.19045	6.2512	7.07536	6.88544	6.83887	6.93635	6.88227	7.23255	6.22915	6.40969	6.70799	6.22441	6.08348	5.82697	5.66528	5.80295	5.61557	3.28019	3.61202	3.79368
CC2G_001223	6.12683	6.28273	6.18562	6.04752	6.60787	6.58488	7.09957	6.98208	7.07023	6.96752	6.91706	6.98131	6.9246	6.89421	7.21307	7.23476	7.333	7.57743	6.89351	6.93208	6.93318	6.82345	6.82397	6.87976	7.78326	7.85179	7.59402
CC2G_001224	5.26619	5.21008	5.26895	5.41814	5.11523	5.11452	7.61851	7.60061	5.37618	5.98305	5.71179	5.63162	5.91461	5.97073	5.9026	5.67037	5.86316	6.00417	5.48429	5.40433	5.57872	5.41986	5.02686	5.04292	4.57905	4.6654	4.57887
CC2G_001225	5.24196	6.46708	6.13772	3.46232	4.41437	4.42291	4.61017	4.5343	5.42527	5.04958	5.07195	5.07191	5.0615	4.9185	4.99719	4.61083	4.67035	4.88822	5.06086	4.95551	4.94652	4.99422	4.60881	4.66912	3.33916	2.86216	2.44842
CC2G_001226	9.24185	9.61978	9.75521	9.71053	9.78238	10.1256	10.4494	10.4389	8.61983	8.55243	8.39624	8.13456	8.36677	8.43161	8.40837	7.17275	7.10566	7.12303	7.57835	7.52833	7.28867	8.48736	8.62702	8.4718	8.98142	9.16132	8.91191
CC2G_001227	2.24419	1.0878	1.75577	4.87754	4.02171	4.97018	4.74755	4.11942	4.52301	6.28934	6.03001	6.16284	6.05167	6.52289	6.40741	5.28611	2.98071	2.92011	6.07506	6.45975	6.72166	1.1602	0.544805	1.3186	1.08044	0.772326	0.591308
CC2G_001228	5.19647	5.7862	5.92842	4.79314	5.00541	5.38889	5.35806	5.26903	4.00828	5.14229	4.85242	4.94589	5.01792	5.09199	5.08796	3.99705	3.90025	3.70933	4.92665	4.935	4.85071	4.90359	5.03193	4.72841	3.9151	3.82262	3.60235
CC2G_001229	2.30781	2.5812	2.93655	2.58761	2.44513	1.57485	2.93905	2.49389	1.44615	3.89694	2.86319	3.22923	2.25578	2.96457	2.62879	2.4965	2.61411	2.34025	2.50712	2.32301	2.60162	2.98893	2.72696	2.93937	1.14797	0.933809	1.08035
CC2G_001230	4.60807	3.63411	4.08794	5.89389	6.05346	5.2706	7.64806	7.67141	5.69315	6.94777	6.50946	6.57599	6.27265	6.49825	6.39462	6.25104	6.79334	6.6941	6.33558	6.23136	6.53482	6.69587	6.47819	6.65068	4.95868	5.09491	5.15592
CC2G_001231	7.01529	7.52965	7.63612	8.83077	8.87172	9.24143	6.91938	6.81618	7.56227	5.7858	6.16452	5.97199	6.40542	6.64349	6.81647	6.74184	6.70673	6.86781	6.24712	6.28327	6.10861	6.86698	6.79966	6.94745	5.4416	5.74949	5.13943
CC2G_001232	7.15913	7.33364	7.61761	7.72426	8.00176	8.1227	7.82717	7.81189	6.91564	6.63433	6.5629	6.54542	6.6232	6.74006	6.78441	7.18363	7.03527	6.83301	6.39779	6.75037	6.46896	7.14088	7.27819	7.10675	8.0442	8.12176	8.0589
CC2G_001234	9.47945	9.62185	9.73978	8.58311	9.46476	8.82928	7.21622	7.26573	8.41151	6.96997	7.34179	7.81183	7.52538	7.84355	7.59606	9.82142	9.52469	8.96874	8.2537	8.61629	8.89916	7.93823	8.15226	8.01486	8.4612	8.21851	8.33314
CC2G_001235	2.98941	4.5253	4.30009	6.92201	5.74722	5.36599	5.91578	5.60446	4.08359	3.79746	3.47912	3.09844	3.31368	4.01517	3.58543	3.08469	3.03228	2.8213	3.40693	3.07801	3.07049	3.91209	3.91732	3.61591	3.89559	3.8329	3.70679
CC2G_001236	1.49337	0	0	3.22523	2.99751	2.9254	5.04632	4.88066	3.24493	3.17185	3.24173	3.43504	3.48351	3.52322	4.10824	2.27016	2.5329	3.10882	2.6088	2.65935	2.31107	3.51943	3.24614	3.505	1.33344	1.38865	1.33333
CC2G_001237	3.51924	3.671	3.65173	4.27603	4.32576	4.62927	6.57012	6.61657	6.3125	6.21967	6.2352	6.29622	6.08584	6.20983	6.60904	5.49799	5.92244	6.3408	5.45728	5.37853	5.26344	5.92189	5.72218	5.99696	6.22638	6.5177	6.14797
CC2G_001238	5.23789	4.41001	4.6213	4.00298	4.61465	4.23354	6.16178	6.24706	5.0021	5.1935	5.27064	5.23167	5.4373	5.22029	5.98496	4.36912	4.36654	4.72774	4.60673	4.21073	4.1189	5.94135	6.05522	6.13919	7.68082	7.77924	7.40686
CC2G_001239	5.12763	5.37567	5.67012	5.17301	5.48615	5.94698	5.65209	5.7267	6.01832	6.19475	6.24146	6.26372	6.24268	6.18489	6.53658	6.10642	6.14176	6.0702	6.04557	6.02647	6.11711	6.47811	6.62373	6.70482	7.69005	7.69161	7.74065
CC2G_001240	3.40753	3.12395	3.34927	4.14595	4.23136	4.28326	5.09519	5.26282	4.78611	4.8226	4.88476	4.70434	5.02454	4.59267	4.96029	4.61405	4.85112	4.88006	4.88961	4.72922	4.57195	4.86335	4.92432	4.94634	5.18049	4.86387	4.90584
CC2G_001241	3.68414	2.82982	2.90637	4.27603	4.68758	4.12863	3.13876	3.13368	4.08359	4.23783	4.18519	4.10372	3.75705	4.2822	4.40748	5.0591	5.00099	5.21234	4.80031	4.84051	4.78514	4.09696	4.1588	4.2946	5.20448	5.26013	4.97254
CC2G_001242	1.54708	1.19301	0.964086	2.11792	2.87796	3.15643	1.47988	1.31566	2.8441	5.89469	5.4721	5.47618	4.4863	4.92399	5.06083	3.93142	4.20741	3.9724	4.84565	4.95259	5.15436	2.69349	2.35879	2.42654	3.60251	3.13557	3.30981
CC2G_001244	3.49211	3.63411	3.75694	6.25106	6.58896	6.31292	5.40866	5.48162	7.31386	6.38301	6.6781	6.66045	6.47556	6.54623	6.40936	7.25037	7.50407	7.38761	6.8659	6.97217	7.08517	6.49137	6.3703	6.43272	5.01402	5.65418	5.39006
CC2G_001245	7.40711	7.01287	7.20386	6.61294	6.84949	6.92744	8.62735	8.54095	6.82345	6.89546	6.96196	6.86231	6.97048	6.84946	7.19106	6.80804	6.80017	7.29603	6.50999	6.40541	6.40393	7.28927	7.35298	7.38435	5.85675	6.18011	5.92553
CC2G_001246	6.93194	7.32209	7.2085	7.93587	7.72694	7.52146	9.14321	9.03895	6.72102	7.22508	7.00305	7.00327	7.26329	7.43265	6.92099	7.06151	7.23462	6.77038	7.24607	7.04369	7.26044	6.32886	6.49571	6.22609	8.90388	8.94448	8.80583
CC2G_001247	6.54001	6.19363	6.10819	6.79756	7.12364	7.30382	5.72488	5.80564	7.1098	6.70368	6.72872	6.82382	6.39779	6.39327	6.57892	6.83106	6.73877	6.7026	6.42492	6.68346	6.87564	6.11418	6.29327	6.23736	7.33824	7.31646	7.27716
CC2G_001248	8.65757	8.15048	8.33898	6.37237	6.96401	6.87165	7.45293	7.37042	6.74249	6.83043	6.84218	6.83571	7.00772	6.96785	7.09827	7.17493	7.1699	7.12764	6.88195	6.69918	6.66479	7.08261	7.18801	7.19347	6.4249	6.67306	6.3868
CC2G_001249	3.00868	2.41717	1.94579	2.94136	0	0	0.406341	0.581482	0.897165	1.141	0.905518	1.55489	1.2274	1.10671	0.898542	1.64634	1.10364	0.585951	1.47459	2.02339	1.76093	6.35189	6.3733	6.25562	7.36509	7.16302	7.18574
CC2G_001250	4.85164	3.8425	4.41172	5.30077	5.42348	5.76644	7.39416	7.17613	6.12021	6.41333	6.36314	6.37875	6.58414	6.6837	6.89399	5.75014	6.08896	6.5072	5.9464	5.92614	6.09021	6.45992	6.36228	6.47661	5.64227	5.91824	5.45148
CC2G_001251	9.6789	10.2375	10.3859	8.91306	8.88535	9.17218	9.88752	10.0408	8.33844	9.21835	8.8682	8.73643	8.53602	8.83513	8.92355	8.84142	9.21933	9.10595	8.33543	8.53565	8.72673	7.66569	7.83146	7.73016	7.02124	7.6259	7.58871
CC2G_001252	5.68386	6.05747	6.1442	2.58761	2.87796	3.04553	4.15007	4.43848	3.57577	3.95085	3.91462	4.05028	3.88385	4.05075	4.11785	4.71952	4.64297	4.69401	4.67865	4.5825	4.65438	4.46666	4.56753	4.61044	4.41055	4.44194	4.50997
CC2G_001253	6.99732	7.60546	7.59059	6.31299	6.40657	6.49277	7.88291	7.76217	5.48204	6.13342	5.45425	5.31333	5.35738	6.15484	5.51616	6.02162	6.39335	5.99538	5.95745	5.91272	6.17991	4.15525	4.06799	3.9606	3.69572	3.75938	3.67281
CC2G_001254	7.20788	8.24755	8.20826	9.99186	9.89445	10.0594	8.84608	8.80227	8.4005	7.69675	7.51837	7.4998	7.36419	7.65165	7.49047	6.82968	6.72186	6.57279	6.73869	6.80305	6.7863	6.17533	6.57683	6.16946	6.8289	6.82751	6.61867
CC2G_001255	5.17531	5.4251	5.32135	8.01252	8.37457	8.49396	7.96972	7.98958	7.62559	7.72216	7.78109	7.70479	7.39305	7.43698	7.55023	7.08666	7.23141	7.65798	6.45254	6.62339	6.71527	7.12516	7.1236	7.21798	5.56717	6.08013	5.23955
CC2G_001256	6.42995	6.86549	6.76291	9.86581	10.1472	10.5455	9.70134	9.61799	8.73575	7.64403	7.45067	7.13167	7.62315	7.71599	7.56698	6.69849	6.61247	6.56008	6.93814	6.91423	6.7296	7.26686	7.16858	7.01806	7.84369	7.81532	7.84669
CC2G_001257	4.90403	3.55737	4.31165	7.37819	7.20041	6.82204	8.71764	8.78506	7.20984	8.13185	8.12389	8.14192	7.69063	7.78363	7.93588	7.61319	8.01034	7.94807	7.49068	7.46487	7.59686	8.56647	8.48691	8.67627	7.65784	7.83591	7.69199
CC2G_001258	0.890903	1.38287	0.561119	5.76688	6.0396	5.59983	4.88096	4.55476	5.33053	5.72522	5.25423	5.1451	5.64494	5.98263	5.61444	5.90283	6.06646	5.91114	5.67888	5.71557	5.5467	0.999758	1.53239	1.43707	0.685278	0.490143	1.27412
CC2G_001259	8.87201	8.37739	8.65138	8.4789	8.42875	8.52271	9.78139	9.92324	8.03195	8.50394	8.2205	8.21932	8.25084	8.64015	8.49823	8.55418	8.95659	8.84041	8.01957	8.01642	8.17017	7.95303	7.89541	7.97594	6.72493	6.86304	6.97996
CC2G_001260	0.971684	1.0878	0.964086	4.00298	2.60428	2.30978	5.85627	5.62395	3.08307	4.13096	3.6706	3.39273	3.90314	4.12893	3.74891	2.71628	3.11432	3.04213	3.63063	3.41062	3.28405	2.91212	3.25483	2.86734	1.14797	1.73394	1.82092
CC2G_001261	4.99381	4.41001	4.52528	4.60791	4.13034	5.14174	6.61869	6.51321	4.6105	5.18509	5.01221	4.77193	5.2409	5.23362	5.57139	3.64685	3.46642	3.58768	4.24101	4.2349	3.80681	5.64846	5.64822	5.59979	4.62124	5.01593	4.57274
CC2G_001262	4.54347	4.50501	4.43304	4.27603	4.32576	4.77543	5.84406	5.69479	4.83779	5.38925	5.31878	5.15019	5.39875	5.22919	5.10497	4.28673	4.25521	3.96213	5.05057	4.68078	4.74808	4.69997	4.496	4.51265	3.01676	3.42089	2.94247
CC2G_001263	6.22278	4.39905	4.30009	7.19298	6.81735	6.83877	8.48986	8.51247	6.54345	7.12457	7.06199	7.02698	6.85386	7.05929	7.11575	5.6454	5.69604	5.9389	6.52214	6.61329	6.31381	7.355	7.5662	7.36953	6.50596	6.94112	6.3955
CC2G_001264	8.43837	7.4681	7.46811	7.25739	7.38166	7.42507	7.80845	7.95536	7.12176	7.48639	7.32027	7.28817	7.05106	7.49025	7.30477	7.41272	7.64875	7.56604	7.40696	7.23076	7.48915	7.74653	7.74462	7.87428	6.32268	6.77518	6.5106
CC2G_001265	7.08277	6.45919	6.65134	8.67441	8.96818	9.36925	8.76426	8.92668	8.35816	7.87986	7.97381	7.93856	7.965	7.91459	8.27224	8.24198	8.27801	8.51493	7.3346	7.45565	7.36307	9.21083	9.30037	9.24459	9.66837	9.85893	9.66531
CC2G_001266	3.23826	3.22665	3.34927	4.50553	2.60428	2.9254	3.89007	3.69078	2.75475	3.25991	3.01701	3.2578	2.8796	2.79509	2.62879	3.38545	2.97194	2.62697	2.96711	2.95538	3.05034	3.24302	3.38726	3.48451	3.29516	3.29274	3.28002
CC2G_001267	5.79625	4.74016	4.70257	6.34299	6.14694	6.84706	7.86692	7.68539	5.77874	6.1779	6.10284	5.86154	6.15989	6.11097	6.4451	4.63641	4.3395	4.6909	4.73756	4.64876	4.37939	6.25968	6.26987	6.16517	4.88143	5.2137	4.66206
CC2G_001268	3.23826	2.01968	2.00394	6.53712	6.0396	5.88391	8.67176	8.53646	4.90162	5.91856	5.75617	5.47618	6.28189	6.18489	5.83432	5.25755	5.38171	4.8636	5.70699	5.6105	5.26563	5.55772	5.41213	5.39547	8.3192	8.65193	8.09837
CC2G_001269	2.45556	2.65671	2.11366	0	2.26623	0	1.97375	1.72965	2.40926	2.13859	2.77392	2.76857	2.58929	2.29926	2.36403	3.40046	2.89974	2.09913	2.63658	2.55571	2.51603	4.46282	4.23548	4.29852	11.5705	12.1304	11.4326
CC2G_001270	6.93573	6.61876	6.70272	6.37237	6.19775	6.42792	5.58523	5.6384	5.76736	5.1907	5.19742	5.0932	5.01792	4.91022	5.10497	5.56611	5.63063	5.96098	5.50328	5.65596	5.48422	5.39185	5.33634	5.32998	4.72991	4.72179	4.39656
CC2G_001271	5.46414	5.78199	5.89423	6.01062	5.65931	5.73104	5.44143	5.66687	6.23478	6.4229	6.45934	6.29851	6.62973	6.54534	6.50855	6.90197	6.599	6.50808	7.03852	7.05187	7.09135	5.76069	5.91141	5.94416	6.41979	6.51291	6.46995
CC2G_001272	4.58257	4.1734	4.31165	4.39534	5.35797	5.11452	4.81579	4.93629	4.80849	4.37232	4.58026	4.52791	4.89322	4.9778	4.6386	5.19008	4.98145	4.9776	4.98724	5.00974	5.03892	6.05417	6.08234	6.12382	7.72916	7.8391	7.55335
CC2G_001273	5.17104	5.55412	5.48343	4.00298	4.23136	5.11452	6.53006	6.20884	4.43947	4.21046	4.54359	4.30421	4.7514	4.27362	4.46882	4.24993	4.04535	4.04718	4.46285	4.44838	4.17117	4.93998	4.93518	4.94133	5.4912	5.64546	5.36545
CC2G_001274	6.25541	5.89934	5.68352	5.6276	5.89312	5.45547	4.86494	4.91271	6.19853	5.17946	5.49497	6.06923	5.75919	6.1734	5.84737	7.43247	7.01832	6.75559	6.50341	7.13449	7.12727	5.94135	6.08112	6.24753	5.02305	5.33072	5.2279
CC2G_001275	5.7739	5.668	5.66111	4.39534	5.21727	5.41142	4.22728	4.79726	4.6105	3.85514	4.1278	4.14509	4.23164	3.93039	4.28065	4.45427	4.48539	4.6077	3.87762	3.85301	4.0945	5.74495	5.82355	5.65584	7.27262	7.25569	7.34975
CC2G_001276	7.3085	7.5221	7.50633	6.902	7.44613	7.31582	6.06345	6.21849	7.04376	6.80321	7.00551	6.95973	6.83012	7.03348	7.09097	7.04131	6.86915	6.76301	7.31378	7.28617	7.38688	7.48428	7.47798	7.51805	8.41697	8.55981	8.61584
CC2G_001277	4.13363	4.01023	3.96156	5.36065	4.88654	5.34273	6.36049	6.21207	4.90854	4.75223	4.63832	4.33135	4.85658	4.82765	4.52405	5.43015	5.36337	4.71251	4.07834	4.41492	4.53254	4.91488	5.06691	4.92875	4.67373	4.50113	4.46435
CC2G_001278	8.11293	8.93175	9.04113	8.35189	8.67279	8.30828	8.56985	8.60304	7.63918	7.68685	7.68259	7.82422	7.67913	7.94631	7.83611	8.51227	8.35786	8.16198	7.81747	7.98897	8.07985	7.61466	7.68836	7.57043	6.79638	6.9913	6.72198
CC2G_001279	9.50342	10.037	10.0635	7.09061	8.43141	7.51106	4.99573	5.13958	7.04533	5.28554	5.666	6.51418	5.69975	6.00741	5.58877	8.9323	8.92582	8.34008	7.4696	7.75498	7.69587	5.80081	6.00199	5.82428	6.6099	6.68729	6.74942
CC2G_001280	4.71752	5.36445	5.25105	5.47342	4.18173	3.53043	6.14861	6.16294	7.33969	7.52634	7.35531	6.99339	7.12224	7.42444	7.7584	8.69432	8.74076	8.30851	8.49925	8.81232	9.19561	3.91209	3.82692	4.2056	5.47156	5.51752	5.79208
CC2G_001281	5.8613	7.00927	7.0188	5.81047	6.08079	5.19467	5.50998	5.28748	5.29928	4.94055	4.73905	5.16786	4.88838	5.15873	5.13603	5.89358	5.72244	5.32482	5.9013	6.21322	6.1447	5.62631	5.73622	5.65889	6.65991	6.5161	6.62609
CC2G_001282	4.08906	3.99577	3.8068	2.94136	4.61465	4.42291	3.26619	3.59526	4.66873	4.80807	4.2855	4.35799	4.38702	4.47787	4.28065	5.56111	5.4871	5.06417	4.68864	4.99	5.0079	3.24302	3.40299	3.0364	2.69423	3.11887	3.1042
CC2G_001283	2.98941	2.65671	2.16555	0	1.18283	1.21373	0.573356	0.869721	3.35035	4.53999	4.04912	3.76861	3.95951	3.90284	3.22555	4.5716	4.5339	3.99272	4.13787	4.29591	4.14765	1.79484	1.79334	1.67265	1.69126	1.81912	1.7357
CC2G_001284	6.50142	6.71685	6.44901	5.76688	6.7251	7.06173	7.65972	7.55056	6.82528	6.63433	7.0614	7.20074	6.99653	6.75631	6.6226	7.20729	6.71003	6.48046	7.60364	7.70005	7.63119	6.83687	6.91797	6.7634	5.54855	5.86415	5.49102
CC2G_001285	6.64688	4.88065	5.18345	7.59312	7.44086	7.56231	7.6375	7.74001	7.62769	7.68884	7.6722	7.56746	7.38235	7.69285	7.57441	7.87694	8.26729	8.14959	7.05856	7.06878	7.28167	6.83315	6.69014	6.94183	5.64227	5.94454	6.02541
CC2G_001286	7.25302	7.20591	7.45383	6.37237	6.31747	6.63361	5.54558	5.54945	7.09622	5.40623	5.86419	5.65866	5.85889	5.66606	6.31439	5.64225	5.62364	5.71103	5.44751	5.87938	5.73841	6.53685	6.61869	6.59522	6.87446	6.6558	6.86302
CC2G_001288	4.49646	4.41001	4.57409	4.14595	4.02171	3.35552	7.41768	7.41865	3.88737	3.38267	3.76049	3.57027	4.21243	4.09037	4.27207	4.3843	4.15797	4.41033	3.88343	3.96127	4.2171	5.32569	4.97782	5.04758	7.29048	6.55387	6.69966
CC2G_001289	0.890903	0.851145	0.397192	0	0	0	0	0	0	0.191317	0	0.169976	0.200442	0.29949	0	0.218937	0.252771	0.222816	0.307087	0.248141	0.159041	0.234393	0	0.71404	1.39032	1.54684	1.64513
CC2G_001291	9.44273	8.88933	8.95392	7.82334	7.69634	8.18943	7.70653	7.65018	8.06949	7.43412	7.76634	7.74361	7.50264	7.4365	7.76032	8.50817	8.48205	8.47305	7.89067	7.99393	7.77054	7.5446	7.71263	7.65308	7.26504	7.50338	7.44175
CC2G_001292	4.60174	4.76597	4.3345	2.11792	1.82392	1.86343	1.71248	0.732788	2.10631	2.33384	1.76611	1.35783	1.62607	1.77503	1.99849	1.71995	2.12139	1.71478	1.37915	1.52445	1.48874	0.999758	0.850352	1.40836	1.44504	1.14649	1.3902
CC2G_001293	7.21412	7.83613	7.873	6.01062	6.15981	6.1616	5.29371	5.19276	4.46786	4.13096	3.79493	4.06652	3.80399	4.15719	3.89015	4.62368	4.65946	4.45861	4.41552	4.52486	4.54339	4.01012	3.82692	3.86344	4.16374	3.99726	4.40348
CC2G_001294	4.4408	3.59625	3.79037	6.0835	6.52074	6.90379	5.77717	5.59954	7.17583	6.46981	6.72352	6.76034	6.54014	6.63262	6.78591	7.25037	7.21755	7.15269	6.68732	6.74786	6.93593	6.40991	6.60855	6.63062	7.99691	7.77525	8.34712
CC2G_001295	6.94326	5.77777	5.96182	6.18635	6.30594	6.55482	6.30815	6.31759	6.14971	6.4049	6.15128	5.93266	5.73651	6.19287	6.05414	5.82016	5.9484	5.96613	5.69218	5.50117	5.63901	5.92469	5.90728	5.96157	5.98923	5.96103	6.04325
CC2G_001296	1.04818	0	0	0	0	1.57485	1.56165	1.31566	0.655293	0.278232	0.628317	0.392426	0.533215	0.428747	0.546854	0.218937	0.193608	0.585951	0.500916	0.585414	0.368893	0.435973	0.755516	0.890529	1.0096	0.590463	0.856451
CC2G_001297	2.03456	1.38287	1.18127	4.79314	3.63598	4.01549	6.26608	6.43811	4.46786	6.24147	6.41112	6.37114	4.00933	4.13368	4.57725	1.24223	1.67905	1.91972	3.03131	3.06728	2.97749	2.71948	2.83527	3.25377	3.80435	3.57577	3.77245
CC2G_001298	2.27635	2.07578	2.00394	7.68966	8.03708	8.06346	8.53611	8.3346	8.09474	6.88511	7.07723	6.94516	7.08894	6.66086	7.08302	9.62981	9.43104	8.61971	7.90894	8.21415	7.97382	9.22777	9.04632	9.23874	10.8169	10.7116	10.8644
CC2G_001299	0	0.402256	0	0	0	0	0.573356	0.581482	0.364536	0	0.218754	0	0.261511	0.29949	0.157334	0.678863	0.516883	0.531427	0.872021	0.644344	0.60829	1.74509	1.53239	1.72016	0.591369	0.772326	1.08035
CC2G_001591	0.714357	1.70089	1.61359	0	0.709386	1.57485	3.05653	3.18708	1.6581	2.27165	1.96071	2.02271	1.53006	1.53772	1.59284	0.819467	1.00385	1.15363	2.131	1.61562	2.16875	2.46673	2.37483	2.53678	1.59775	1.77716	1.59763
CC2G_001599	2.84678	2.95476	3.15762	0	0	2.49	0.858618	0	2.00663	0.511383	0.726755	1.28567	1.13251	0.8993	1.18108	0.98787	1.34025	1.55995	1.53489	1.24871	1.54744	2.98893	2.63671	2.9293	0.773445	1.49602	1.5485
CC2G_001592	2.2113	3.65267	3.72271	2.94136	3.8417	3.75851	3.92138	3.38285	3.08307	3.49581	3.36148	3.32234	3.13755	3.19101	3.2693	3.03748	3.04907	3.41019	3.79374	3.43586	3.65492	2.61257	2.32616	2.66371	2.98017	2.95917	3.0166
CC2G_001593	2.78106	1.96131	2.35621	6.15288	5.40197	5.88391	6.80231	6.77535	5.20123	6.17223	6.11993	6.36459	6.05921	5.80352	5.86459	4.10174	3.89097	3.5052	4.15718	4.1098	4.07468	2.55599	2.78813	3.11848	1.86184	2.08293	2.47496
CC2G_001594	7.54384	7.29576	7.38026	6.15288	6.08079	6.00741	6.5427	6.44087	6.07786	5.68601	5.7721	6.28585	6.05383	6.38831	6.1637	7.43794	7.07167	6.81529	6.94023	7.27689	7.2034	6.06688	6.08478	6.03268	6.91015	7.0409	7.16144
CC2G_001595	4.45492	3.671	3.61488	8.43083	8.59436	9.10809	8.14161	8.11369	7.63188	6.33313	6.51979	6.65866	6.34498	6.42072	5.9731	7.10452	6.79396	6.67693	5.38951	5.44841	5.53406	3.90644	3.54444	3.92048	3.90538	4.11141	3.93418
CC2G_001596	3.06499	3.36815	3.45729	4.27603	4.02171	4.37785	3.75754	3.70915	4.85222	5.41825	5.22294	5.21719	5.16502	5.25557	4.79647	3.5693	3.76455	3.69699	3.41497	3.38493	3.65492	3.20673	3.07996	2.78036	3.9151	3.39338	3.0166
CC2G_001597	0.617261	0	0	2.58761	0	1.86343	0.406341	0	4.34059	5.05575	4.96257	4.86463	3.83947	4.10978	3.7795	2.16865	2.5329	2.4472	2.55158	2.46054	2.84336	0.999758	1.0633	1.08453	1.0096	1.77716	1.14787
CC2G_001601	0	0	0	0	1.18283	0	0	0.732788	0	1.09386	0.284874	0.392426	0.921666	0.807195	0.985067	1.24223	0.859054	0.785514	0.439156	0.755439	0.493552	1.88946	1.81702	1.51995	0.38295	0.265787	0
CC2G_001602	2.03456	0.71646	0.397192	4.95727	4.02171	2.9254	5.31154	5.34734	4.60199	5.65184	5.41049	5.15779	5.44884	5.66278	5.65294	4.00198	4.53091	4.42161	4.86926	4.69479	5.18242	4.77005	4.6588	4.70203	3.2187	3.10198	2.88427
CC2G_001598	6.78601	5.645	5.32705	5.85279	6.01147	6.09355	4.34742	4.33583	7.40721	7.16434	7.53459	7.47162	7.30876	6.93082	7.17101	7.55067	7.51506	7.70839	7.41249	7.43545	7.17982	7.13123	6.93023	7.25726	4.99122	5.42544	4.93481
CC2G_001603	8.03107	7.5971	7.51261	6.48427	6.35153	5.86771	7.08927	7.01013	7.19718	7.43234	7.65433	7.68827	7.56831	7.71875	7.70443	7.63476	7.6563	7.72101	7.85417	7.79982	7.72795	8.06275	8.05076	8.20767	9.27082	9.24475	9.48204
CC2G_001604	4.57613	4.22392	3.88626	6.37237	6.44914	6.43894	7.23347	6.94962	5.57197	5.69196	5.79781	5.71812	6.23318	5.99442	5.94504	5.24722	5.18121	5.208	5.48429	5.38718	5.28947	5.8764	5.96007	5.86183	7.35083	6.96701	7.56188
CC2G_001605	1.04818	0.402256	0	1.41702	0	0	0.21743	0.412428	0	0.191317	0	0.248	0.376402	0.0808996	0.3652	0.348376	0.309604	0.290046	0.374632	0.170075	0.159041	1.30457	1.21358	0.848389	1.59775	1.27265	1.27412
CC2G_001606	6.96931	6.4879	6.55493	5.30077	5.40197	5.71301	5.39756	5.48695	5.88782	5.06494	5.52777	5.39491	5.54562	5.40445	5.77484	5.71456	5.6987	5.90445	5.63307	5.68081	5.65411	6.61769	6.72106	6.82649	8.78893	8.61891	9.14226
CC2G_001615	0	0	0.561119	0	0	0	1.56165	0.581482	1.10425	0.831819	1.10171	1.52386	1.13251	1.02729	0.853253	0.678863	0.820465	0.831372	1.92112	2.32301	1.90258	1.93455	2.01425	1.91649	0.773445	1.44333	1.00951
CC2G_001616	0.617261	0.71646	0	0	0	0	1.78237	0.994777	0.897165	0.581417	0.94695	0.585115	0.959017	0.758839	0.853253	1.13865	1.19697	1.32371	1.6484	1.58587	1.71045	1.40409	1.0633	1.01003	1.27423	0.933809	1.33333
CC2G_001617	1.25598	2.01968	0.561119	2.58761	0	0	2.24525	1.79989	1.78387	0.712044	1.64545	1.49215	1.47954	1.35461	1.67322	2.79788	2.76398	3.0225	3.32393	3.00118	2.36102	1.30457	0.544805	1.54655	0.773445	0	0.773369
CC2G_001623	1.95731	1.0878	1.27872	0	0	0	0	0	2.40926	0.511383	0.726755	0.907104	0.761768	0.708806	0.602655	0.72727	0.896637	1.47583	1.34588	1.42711	1.80971	0.160414	0.939337	0.616978	0.773445	0.933809	0.856451
CC2G_001624	0	1.29106	1.75577	0	0	0	0	0	4.94265	3.54921	2.65395	3.47615	3.02758	2.63016	3.04599	0.523062	0.309604	0	6.01415	4.53657	5.09165	3.31298	2.43727	1.97641	3.94388	3.74856	4.08822
CC2G_001620	0	0	0.561119	0	1.82392	1.21373	1.91274	1.57799	6.97124	2.43188	2.95744	4.5854	2.62459	2.70863	2.58791	5.82016	6.25732	6.59622	6.85264	6.50019	7.17343	3.69345	3.81521	3.54513	2.47511	2.49894	2.21649
CC2G_001619	1.12082	1.83697	1.61359	0	1.5387	2.1038	2.24525	2.40654	6.71512	4.4161	4.58683	5.17287	4.3347	4.47038	4.2284	6.52279	6.74006	7.22103	6.4289	6.23615	6.49809	4.5157	4.50695	4.42934	3.05244	3.70447	3.23416
CC2G_001609	1.74391	2.65671	2.5246	2.94136	1.18283	1.21373	1.20244	1.40851	0.897165	1.8853	1.64545	1.80768	1.73774	2.21216	1.72442	2.04042	1.82264	1.89833	1.6484	1.46029	1.60385	6.17063	6.21968	6.10381	3.08726	3.26264	2.69408
CC2G_001610	5.63509	4.36569	4.11458	3.84426	3.63598	3.04553	2.8442	3.04969	4.57614	5.22119	5.45245	5.77853	5.08703	4.98307	4.8807	6.44352	6.5556	6.58622	5.87385	5.95262	5.81209	5.36945	5.23452	5.41184	5.43147	5.2371	5.4279
CC2G_001611	4.22708	4.21146	4.03313	3.46232	4.13034	4.12863	3.57268	3.69078	3.6602	3.44974	3.6074	3.32234	3.25483	3.35451	3.18956	3.10315	2.83346	2.87703	3.50061	3.09923	3.14841	3.95648	3.97634	3.73055	3.94388	3.56348	3.89542
CC2G_001612	7.69722	7.08469	7.18513	6.25106	6.22251	5.83474	6.14529	6.2376	6.25935	5.95694	6.26929	6.17662	6.18079	6.22326	6.0863	6.26135	6.29827	6.40001	5.91555	5.96567	5.87503	6.89077	7.00943	7.07284	7.66218	7.74087	7.45264
CC2G_001613	6.53004	6.29755	6.44639	7.76914	8.04056	8.16642	8.48855	8.48941	7.3047	7.73854	7.6749	7.53573	7.41757	7.59682	7.95978	6.34614	6.39253	6.71947	6.8159	6.83186	6.88349	8.29873	8.58411	8.45127	9.6153	9.85105	9.67357
CC2G_001614	1.59886	0.974322	1.27872	0	1.82392	0	1.56165	1.10985	2.05733	1.67716	1.89871	2.17028	1.62607	1.62124	1.62013	1.10241	1.49528	1.07956	3.16131	3.14075	2.64259	3.63319	3.62041	3.60962	3.9151	4.01542	3.55338
CC2G_001625	7.16021	6.71464	6.71583	5.10462	5.81389	6.21383	5.84406	5.90459	6.22372	6.9486	6.93197	6.72155	6.70104	6.69097	6.7462	6.27871	6.46625	6.58956	7.16672	7.15363	7.01085	7.03553	7.15239	7.00313	7.68509	7.62146	7.97656
CC2G_001626	4.17686	4.14745	4.15364	6.81906	7.15612	7.05459	6.11514	6.34428	6.40104	6.50177	6.53261	6.6416	5.9158	5.89724	6.08752	6.64673	6.63627	6.69874	6.49489	6.45769	6.24232	5.98888	5.91416	6.06408	8.48261	8.73989	8.56425
CC2G_001627	3.43628	2.65671	2.67537	7.28856	7.26736	7.99049	6.07741	6.22489	7.37884	8.3641	8.10056	8.01587	6.37206	6.35921	6.57805	6.76811	6.85311	6.85953	7.41951	7.4987	7.39039	3.62634	3.71796	3.9	5.33698	5.05156	5.41082
CC2G_001628	4.69391	5.00865	4.6849	5.89389	6.14694	6.40565	8.32402	8.32645	5.97612	6.97567	6.58029	6.4024	6.20041	6.59438	6.45176	4.878	5.24816	4.99534	5.63651	5.33224	5.70012	4.25637	4.60541	4.29067	5.08466	5.21763	5.19236
CC2G_001629	0	0.402256	0.397192	2.11792	0	1.57485	1.20244	0	2.81492	2.35399	2.09578	2.32229	0.629023	1.38679	0.985067	2.05945	2.10543	2.17223	2.74265	2.78252	2.96678	2.482	2.25861	1.81073	0	0.590463	0.591308
CC2G_001630	8.05386	8.04025	8.11569	5.47342	5.14143	5.69475	6.26913	5.98217	6.08704	5.78765	6.01182	6.00326	6.18375	6.26389	6.34436	7.35227	7.27754	7.12993	6.70792	6.93945	6.69269	7.50778	7.38699	7.49732	6.85439	7.23743	6.71226
CC2G_001634	5.09193	5.98973	5.87488	2.11792	1.5387	0	0.406341	0.581482	0.517227	0.360207	0.576459	0.169976	0.261511	0.157503	0.230002	0.576887	0.467788	0.290046	0.671762	0.39264	0.368893	0.234393	0.486941	0.279131	0.49092	0.772326	0.490867
CC2G_001631	0.513155	1.29106	1.61359	5.97275	5.31258	5.85132	5.5556	5.53922	5.93604	7.57436	6.75957	6.68257	6.21978	6.40215	6.13797	4.9486	6.27259	5.9098	6.79986	6.5337	7.04117	9.69853	9.80151	9.74717	10.6336	10.4601	10.3255
CC2G_001632	4.44787	4.54531	4.76276	6.61294	6.48026	6.80512	5.86031	5.90459	6.41811	6.47212	6.3224	6.2099	6.16988	6.56305	6.16486	6.01919	6.10811	6.04245	6.49868	6.44117	6.77329	6.84722	6.83778	6.80117	7.54807	7.46673	7.66632
CC2G_001633	2.10787	0.974322	0.841857	0	2.44513	2.30978	5.08831	5.01223	1.95408	2.04254	1.33807	1.20971	2.19447	3.03732	1.89055	1.20852	1.54346	1.11707	1.59276	0.585414	0.993226	1.86638	2.18773	2.03394	2.44857	2.08293	1.7357
CC2G_001636	2.4272	2.82982	3.43632	4.70349	4.45671	5.29505	4.44761	4.35928	6.9122	6.0292	6.0432	6.22807	6.08267	5.96275	6.24595	7.24518	7.20169	7.27648	7.49401	7.62888	7.8216	6.81744	6.61616	6.55975	8.07055	7.87497	7.95963
CC2G_001637	0	0.851145	0	2.94136	0	1.57485	7.01683	7.18272	2.87269	2.79822	3.1909	3.08787	3.26232	2.68295	3.06598	4.10174	3.92775	3.97751	2.91134	3.21066	3.19505	1.74509	0.939337	1.40836	2.71665	2.99622	3.15432
CC2G_001494	0.279274	0.215102	0	0	1.18283	0	0	0	4.09577	4.02812	3.74295	3.44336	1.55466	1.64803	0.942453	0.678863	0.654876	0.531427	1.56411	1.78232	1.45847	1.79484	1.71989	1.89595	5.85422	4.24823	5.56699
CC2G_001495	0	0	0.397192	0	0	0	0	0	5.81602	5.26174	5.33056	4.07189	2.52847	2.15725	1.72442	0.467151	0.740045	0.68918	3.03131	3.13048	3.30121	0	0.156663	0	0.266241	0.382322	0.266211
CC2G_001529	0	0.215102	0	0	0	0	0.723026	0.581482	0.655293	0.360207	1.13794	1.04463	2.86983	3.90839	3.59921	0.523062	0.516883	1.15363	3.41497	3.74272	2.22378	0	0.156663	0	1.77907	1.64342	1.3902
CC2G_001536	0.617261	0.215102	0	4.50553	2.60428	1.86343	1.63904	1.49574	2.81492	2.82734	2.59	2.40976	2.52847	2.38141	2.45779	1.48678	1.44543	2.17223	2.18843	2.67357	2.70838	1.66709	1.53239	1.83251	1.94012	0.772326	2.04998
CC2G_001572	3.47836	5.83578	5.99804	0	0	0	0	0	0.364536	0	0.149457	0	0	0	0.299184	0.285108	0.193608	0	0	0	0	0	0	0	0	0	0
CC2G_001362	8.4223	8.39954	8.38963	7.30389	7.20041	7.16482	7.65739	7.59321	6.97124	6.56256	6.7603	6.70436	6.62247	6.63346	6.58932	7.72952	7.56187	7.46511	6.72177	6.92393	6.78554	7.06751	7.11944	7.16424	9.04008	8.71371	9.06985
CC2G_001363	5.69282	5.21008	5.15164	6.7082	6.0396	6.5033	8.03828	8.13932	6.21258	5.78209	5.83828	5.47618	6.13868	6.13366	5.9797	4.78673	4.90973	4.93885	4.75984	4.78921	4.81532	6.34877	6.57423	6.3216	7.39145	7.2756	7.74065
CC2G_001364	5.39991	4.57481	4.57409	4.79314	5.16715	5.78382	4.93566	4.98986	6.0247	6.23197	6.78977	6.72667	6.66477	6.41293	7.01524	6.01919	5.77257	5.48402	6.43781	6.54534	6.33271	6.2441	6.35522	6.38285	7.93911	8.1933	8.06601
CC2G_001365	1.78919	0.71646	0.708306	3.46232	2.26623	3.15643	2.19488	3.10622	4.45846	4.56181	4.69718	4.7078	3.37715	3.46413	3.48508	4.03119	3.9636	4.49468	4.1715	4.34114	4.48452	4.43564	4.35755	4.55911	2.44857	2.75816	2.94247
CC2G_001366	8.35848	8.60533	8.65251	6.86113	7.34831	7.15817	7.4108	7.32052	6.55673	6.49838	6.44766	6.56269	6.46261	6.73694	6.62513	7.53164	7.35257	7.08804	6.4447	6.84212	6.86269	7.73144	7.88424	7.86077	8.02693	7.9948	8.15074
CC2G_001367	2.45556	2.95476	3.13177	2.58761	1.82392	1.21373	0.982555	0.732788	1.36797	1.141	0.466791	1.24819	1.0656	1.28802	1.10584	2.20328	2.03976	1.41689	1.6484	2.06712	1.98983	2.80694	2.32616	2.49642	7.75172	7.35886	7.9561
CC2G_001368	7.29287	6.35819	6.57665	6.01062	6.12084	6.37157	8.57601	8.77256	6.13798	5.78209	6.06336	5.72155	6.34321	6.05575	6.44986	5.53755	5.85125	6.32285	5.85623	5.30053	5.30231	6.05417	6.27736	6.05369	4.93975	5.56761	5.12693
CC2G_001369	0.971684	1.38287	1.82193	0	1.5387	0	0	0	0.897165	0.278232	0.408664	0.585115	0.674642	0.428747	0.898542	1.17401	1.10364	1.18929	1.16693	1.04509	1.11467	0.435973	0.486941	0.666326	1.08044	0.590463	1.7357
CC2G_001370	7.57569	8.05689	8.13452	8.69781	9.03083	8.73861	7.17945	7.34127	8.2328	8.04311	8.29133	8.35636	7.96357	7.99865	8.14001	8.61132	8.65803	8.51119	8.33807	8.52638	8.5712	6.48854	6.64621	6.41929	6.6743	6.93755	6.79093
CC2G_001371	4.9841	4.99417	4.9145	5.36065	5.31258	5.49821	6.54521	6.09821	4.73252	5.10116	4.84969	4.7916	4.81389	4.97515	5.15714	3.4373	3.9232	4.5159	4.49735	4.36323	4.55774	5.40992	5.72688	5.47552	5.45499	5.54591	5.68534
CC2G_001372	5.13641	5.25329	5.25105	5.41814	5.38014	5.56003	5.61426	5.52892	5.14959	5.28292	5.33837	5.30651	5.32198	5.28788	5.4942	4.92804	5.01387	5.22956	4.98184	4.97859	4.83901	5.92887	5.8976	5.96527	5.01402	5.33072	5.20033
CC2G_001377	3.98587	5.79876	5.73594	5.81047	5.26571	5.65753	6.62821	6.23126	4.88065	5.58522	5.40306	5.30651	5.92645	5.87189	5.02042	3.5693	3.48505	2.54678	4.8367	4.53268	4.45416	4.30868	4.12126	3.77059	4.48425	4.04223	4.01778
CC2G_001378	7.64967	7.55455	7.66006	7.48966	8.20173	8.21848	6.24148	6.28429	8.12402	7.81412	8.0264	7.99799	7.67071	7.69043	7.80449	7.68847	8.17065	8.41564	7.89212	7.98968	8.3911	8.76068	8.863	8.87022	9.76412	9.80416	9.97633
CC2G_001379	0.279274	0.402256	1.37	1.41702	0.709386	1.86343	0.573356	1.10985	0.364536	1.35606	1.94034	1.78168	1.62607	1.25354	1.99849	0.628776	0.516883	0.222816	1.94354	1.2862	1.71045	1.95657	0	1.54655	0.685278	0.590463	0.382908
CC2G_001380	1.69717	1.38287	0.964086	0	0	0	0.406341	0.581482	0.364536	0.581417	0.726755	0.644021	0.803435	0.807195	0.853253	1.20852	0.896637	0.68918	0.560142	0.644344	0.813558	0.719702	0.229045	0.760228	0.773445	0.490143	0.591308
CC2G_001381	2.68849	2.98437	2.71072	0	0	1.21373	0.982555	0.581482	0.781292	0.773174	1.13794	0.858186	0.674642	1.67434	1.28706	1.13865	1.13543	1.32371	1.00585	1.2862	1.54744	1.26981	1.24882	1.6483	1.73583	0.590463	1.33333
CC2G_001382	6.6	6.81488	6.7417	5.85279	6.41733	6.09355	6.62821	6.61169	5.72878	5.85636	5.96217	6.08791	6.22936	6.02285	6.16486	6.17673	6.10611	6.00041	6.2324	6.32439	6.03359	7.03165	7.17718	7.10003	6.75231	6.86179	6.87428
CC2G_001383	1.54708	2.18183	1.61359	0	0.709386	0.730907	0.406341	0	0	0.0988273	0.149457	0.169976	0.200442	0.230242	0.157334	0.408985	0.252771	0.222816	0.161699	0.248141	0.232436	0.304762	0.297968	0.341223	1.73583	1.27265	1.08035
CC2G_001384	8.95631	8.25213	8.37524	8.00316	8.41002	8.25943	6.72456	6.88242	7.72988	7.27679	7.62552	7.6193	7.75873	7.33605	7.40036	8.79516	8.63146	8.38016	7.25394	7.79088	7.59512	6.57739	6.62792	6.67575	7.7181	7.70566	7.66991
CC2G_001385	8.29613	7.6326	7.78659	7.37819	7.65602	7.61181	7.56375	7.72429	7.81982	7.4353	7.73859	7.73601	7.71164	7.50452	7.90258	8.23075	8.25875	8.33958	7.83143	7.72373	7.65891	7.85677	7.91748	7.99297	7.72709	8.10596	7.82751
CC2G_001386	7.6987	7.28092	7.36509	5.03282	5.54621	5.00023	6.69542	6.66677	5.59361	5.72328	5.79639	6.00607	5.82515	5.70487	6.23826	5.65168	5.65551	6.02282	5.86506	5.88703	5.58749	7.75244	7.76149	7.87559	6.84042	7.19922	6.76965
CC2G_001387	6.08432	7.27194	7.37339	5.10462	4.9766	5.22043	4.02592	4.42742	5.07773	5.37699	5.75325	5.80296	5.45375	5.37267	5.51979	5.98973	5.96287	5.74437	5.85031	6.14727	5.75719	4.32147	4.47382	4.61359	4.7077	4.40798	5.19236
CC2G_001388	6.77198	6.88721	7.0188	4.79314	4.61465	4.28326	5.20106	5.31772	4.2671	4.83699	4.80813	4.69393	5.1245	5.34222	4.79647	4.31868	4.54873	4.41033	4.87219	4.69827	4.77597	5.51012	5.50252	5.41364	4.84119	4.90828	4.82564
CC2G_001389	4.48962	3.82624	3.79037	3.46232	4.75699	4.23354	6.31995	6.37911	4.96274	4.23783	4.79685	4.68694	5.01349	4.74938	4.92789	5.13507	5.58243	5.39521	4.72467	4.61232	4.42706	5.29577	5.44859	5.45635	4.74088	4.86387	4.74616
CC2G_001390	3.18843	2.32759	2.16555	4.50553	3.48049	3.95541	3.64949	3.51401	6.22649	6.23197	6.03482	6.33249	5.7919	6.32951	6.01612	5.78914	6.24826	6.08092	6.31101	6.20591	6.43439	6.50732	6.50758	6.58001	5.96134	6.15371	5.88405
CC2G_001391	7.27508	7.81362	7.8943	7.1427	7.37615	7.40836	8.20262	8.01009	5.60217	5.26441	4.53003	4.5396	4.71638	5.33811	4.86368	5.77338	5.66643	5.47502	4.90967	4.91719	4.77597	6.15046	6.14331	6.15441	5.70246	5.78697	5.31125
CC2G_001392	4.97433	5.69512	5.53858	6.4294	6.17257	6.624	6.74876	6.56203	6.34347	7.43825	7.09462	7.0998	7.26842	7.42686	7.3272	6.53219	6.60964	6.19932	7.47249	7.4952	7.57587	6.04777	6.13155	5.93413	7.1606	7.18023	7.2781
CC2G_001393	1.18999	1.46918	1.75577	3.46232	1.18283	3.04553	3.82533	3.99019	3.41009	3.19437	3.23338	2.97768	3.68085	3.66116	3.28644	3.1304	2.7435	2.3243	2.94506	2.54028	2.88947	1.19767	1.21358	1.25551	1.08044	0.684258	0.591308
CC2G_001394	0.714357	1.46918	0.841857	0	2.06196	3.15643	2.29391	2.89782	2.69196	2.33384	2.49543	1.75521	2.39856	2.69585	2.33137	2.16865	2.10543	1.63944	1.12832	1.61562	1.94686	0.556239	0.600438	0.666326	0.49092	0.590463	0.382908
CC2G_001395	8.6067	9.2566	9.21739	6.53712	6.69003	6.84706	4.57122	4.8312	4.98255	4.02812	3.50709	3.91332	4.16527	5.14469	4.23282	5.50495	5.60956	5.37212	5.21852	5.55015	5.5503	4.83391	4.79915	4.89033	3.99979	3.72668	4.36143
CC2G_001396	0.279274	0	0	0	1.18283	1.57485	0.406341	0.581482	1.44615	0.994679	0.818903	1.00023	0.995425	0.603213	0.708172	1.06523	1.13543	0.918933	1.44347	0.858588	1.36365	0.770318	1.17745	1.01003	2.05012	1.89954	1.5485
CC2G_001397	2.90964	2.50152	2.35621	3.46232	3.39597	3.04553	3.93679	3.86472	4.16676	4.95051	4.77113	4.84906	4.45396	5.00397	4.55973	4.40676	4.34291	4.27583	4.62418	4.62335	4.83607	5.37354	5.37872	5.52651	6.80032	6.51291	6.55325
CC2G_001398	4.65163	4.97217	4.74582	4.00298	3.8417	3.35552	6.05288	5.32964	3.98227	4.15986	3.81744	4.17536	4.17721	4.59955	3.99291	4.50721	4.34291	3.86626	4.07834	4.27741	4.00832	4.58803	4.44372	4.31795	3.36777	3.10198	3.35337
CC2G_001399	3.76569	3.6153	3.82305	2.58761	3.30619	3.95541	2.93905	3.04969	3.59306	3.44035	3.6074	3.68692	3.76234	3.95742	3.89015	4.2164	4.14241	3.88268	4.13787	4.34114	4.30903	4.76694	4.63569	4.55584	4.67373	4.35904	4.66206
CC2G_001400	4.56315	4.28469	4.63976	3.66589	4.41437	4.12863	3.63066	3.79764	4.36091	4.27529	4.08204	4.46804	4.6118	4.84802	4.70064	4.95624	4.95497	4.6044	5.17419	5.22773	5.17313	5.40992	5.51343	5.64048	5.7467	5.31615	5.82597
CC2G_001401	7.55535	7.73305	7.58584	6.86113	7.29679	7.07591	7.49647	7.48811	6.83075	7.56736	7.55525	7.52353	7.32494	7.35955	7.32409	7.35034	7.36728	7.24982	7.25057	7.28328	7.25605	6.53136	6.54262	6.41207	6.76447	6.81071	6.76428
CC2G_001402	8.53499	9.12361	9.30855	8.84132	8.80363	9.35042	7.83747	7.71182	8.39805	7.77869	8.05243	8.07225	8.06367	8.11307	8.06347	8.8585	8.66008	8.68048	8.458	8.70482	8.77934	7.79623	7.8744	7.9615	7.69571	7.86687	7.91672
CC2G_001403	4.41214	4.9423	4.92206	2.94136	3.96417	4.7042	5.14247	4.72689	4.73252	5.26441	5.25009	5.19274	5.07219	5.24902	4.79647	5.13732	4.97487	5.10208	5.36273	5.41071	5.52313	5.07697	5.25633	5.11133	4.63895	4.62458	4.52909
CC2G_001405	3.86419	3.57694	3.65173	4.39534	3.96417	3.61053	5.01763	4.93629	4.45846	4.22694	4.55704	4.50823	4.20079	4.19856	4.59455	4.85094	4.87013	5.08325	3.97876	3.85301	3.78868	6.26521	6.29432	6.41749	5.56099	6.06277	5.65665
CC2G_001406	1.25598	2.72847	2.48431	5.03282	4.65157	5.19467	4.0685	4.01992	4.69298	4.67825	4.17651	4.30877	4.27301	4.64682	4.28492	4.52786	4.75207	4.46226	4.13787	4.1254	4.33425	4.13608	4.09245	4.46115	4.55437	4.50756	4.43761
CC2G_001407	6.39742	5.67709	6.00873	4.95727	5.28934	5.81796	7.17134	7.36898	5.52321	4.86534	4.92419	4.84279	5.08069	4.95115	5.12416	5.71456	5.60815	5.93496	4.90967	4.60492	4.68084	4.97816	5.10588	5.22891	3.82513	3.74856	3.32448
CC2G_001408	1.74391	3.20165	2.31086	2.58761	2.26623	2.1038	5.0392	5.09836	2.05733	3.37283	3.3305	3.24834	3.23212	3.37871	4.02899	2.30247	2.35533	2.57401	2.65027	2.72907	2.34456	4.1409	4.19539	4.16755	1.54862	2.01235	1.14787
CC2G_001409	5.13641	4.97954	4.74582	7.78014	7.9434	8.04556	10.017	9.80226	7.05159	7.77028	7.54264	7.39384	7.82377	7.94597	7.89387	6.26341	6.35843	5.94021	6.91777	6.75623	6.61934	7.64337	7.7423	7.57124	7.41905	7.33465	7.23023
CC2G_001410	4.34549	2.95476	3.02347	7.73561	6.78448	6.88781	10.6021	10.6784	5.75205	6.4524	6.24769	6.00326	6.74781	7.24079	7.29422	5.43381	5.92472	5.95193	5.57323	5.49318	5.07179	3.59859	4.01779	3.95564	2.57663	3.08488	2.60077
CC2G_001411	2.2113	1.55062	2.11366	3.66589	1.5387	2.79434	3.93679	3.59526	2.05733	2.60999	2.53672	2.44332	2.81995	2.39729	2.81747	2.75182	2.45946	2.66546	3.02081	2.82134	2.68242	2.81901	2.92516	2.69971	1.27423	1.27265	1.00951
CC2G_001412	0.714357	0.567895	0	0	1.82392	0	2.03229	2.05095	0.897165	1.27385	1.5411	1.58527	1.03094	1.28802	1.64692	1.39986	1.36727	1.44666	1.50505	1.46029	1.48874	1.52693	1.47402	1.40836	0.139254	0.590463	0.490867
CC2G_001413	3.97612	4.12103	4.21648	4.39534	3.70786	4.18203	3.70452	3.79764	3.98227	4.29627	4.30952	4.12971	4.36284	4.16184	4.28918	4.35764	4.20741	4.44023	4.4275	4.24446	4.14765	4.21586	3.88967	4.10629	4.24309	4.06856	4.0796
CC2G_001414	6.39559	6.32963	6.27395	6.86113	6.59844	6.55482	5.41417	5.54435	6.46816	6.76328	7.00489	6.94516	6.78533	6.73694	6.92988	6.93132	6.91566	6.97576	7.27398	7.3462	7.06019	6.85311	7.00493	7.0228	6.91984	6.98094	6.93049
CC2G_001415	2.93	3.98115	4.1791	0	2.60428	3.75851	3.84179	3.79764	3.35035	3.10208	3.18226	3.53958	3.34223	3.20912	2.95245	2.9484	2.75378	2.89873	3.34933	3.38493	3.1389	3.06186	3.10902	3.17923	2.39399	3.01439	2.39384
CC2G_001416	4.47584	5.22876	5.31562	4.50553	4.53784	4.46662	4.95848	4.99736	4.42023	4.76357	4.67885	4.62249	4.87867	4.6064	4.89474	4.80658	4.74951	4.41033	4.61374	4.68078	4.65772	5.47431	5.59101	5.553	5.17241	5.0734	4.94907
CC2G_001417	7.9474	8.18994	8.31478	6.40117	6.69888	7.05459	6.57259	6.31759	7.02158	6.84029	6.96196	7.08194	6.83515	6.97316	7.02995	7.24778	7.15738	7.20261	7.22906	7.34952	7.29832	7.18876	7.20325	7.21384	7.19493	7.47823	7.31896
CC2G_001420	3.85358	4.1343	4.16643	4.00298	5.00541	5.45547	2.08855	2.10743	5.53667	5.06494	5.1472	5.26957	5.6845	5.90421	5.41654	5.95203	5.7458	5.40092	6.02339	6.20468	6.11468	5.63998	5.91278	5.67856	6.82116	6.878	7.30238
CC2G_001421	4.91429	4.43167	4.59316	6.66135	7.36508	7.34538	5.56554	5.50809	6.64017	5.90667	6.40276	6.24956	6.18769	6.68208	7.21139	6.1614	5.91101	6.20477	5.1382	5.45047	5.39113	6.61769	6.68934	6.84268	6.95562	6.96701	7.1263
CC2G_001422	3.0277	3.95147	3.855	4.50553	4.37075	4.59029	2.08855	1.10985	3.62702	2.93826	3.60092	3.55501	3.26232	2.93223	2.97377	3.70239	3.08206	2.7868	3.86593	3.49309	3.2042	3.80083	3.55152	3.35506	5.99153	5.91582	5.91103
CC2G_001423	4.23529	4.50501	4.48501	6.92201	7.55732	7.86547	6.69542	6.61657	6.66082	6.49838	6.77906	6.44547	6.87295	6.47786	6.69818	6.42896	6.19269	5.7755	6.79371	6.61697	6.41481	5.86189	5.8976	5.89585	6.72769	6.71949	6.65394
CC2G_001424	0.714357	0.71646	1.18127	4.14595	2.60428	2.1038	3.70452	3.63423	3.22289	2.99067	3.0267	2.83328	2.83006	2.85383	2.97377	3.1304	3.09828	3.17256	3.59567	3.34995	3.34323	3.53415	3.27207	3.08257	3.76188	3.44788	3.2649
CC2G_001425	6.09111	6.48013	6.61681	5.67554	5.14143	5.29505	4.92797	4.69959	4.4772	3.94422	3.73114	3.85841	3.85442	4.0707	3.52895	3.69632	3.61474	3.30847	4.48594	4.29591	4.23506	5.15999	5.34857	5.07525	5.97535	5.56453	6.02541
CC2G_001426	4.66383	2.45996	2.48431	5.67554	5.5849	5.63855	7.59443	7.57955	5.77117	6.32677	6.25699	6.12069	6.61518	6.36225	6.54461	5.73246	5.7458	5.79588	5.86213	5.61604	5.39912	6.98954	6.99199	6.89537	4.13906	4.53929	3.68423
CC2G_001427	6.3491	5.87584	5.61986	5.57802	5.90845	5.88391	6.91744	6.73334	5.00855	4.61704	4.15014	4.1603	4.49268	4.45149	4.45752	4.30279	4.51288	4.66581	4.62418	4.24446	4.25722	4.86335	4.56404	4.51602	5.771	5.14937	6.57334
CC2G_001428	5.77671	4.68712	4.57409	7.09061	7.00024	6.76193	8.6232	8.52419	6.4705	6.62814	6.6328	6.38308	6.56987	6.77846	6.83843	6.21861	6.22074	6.47415	6.18967	6.26929	6.2401	6.64338	6.71162	6.515	7.59041	7.68382	7.67564
CC2G_001429	2.93	2.28062	2.56379	4.39534	4.65157	4.74026	5.87238	5.85596	4.2454	4.60448	4.13229	4.09319	4.17721	4.41685	4.55973	3.52206	3.36951	3.58098	3.77511	3.78262	3.89986	4.34253	4.18178	4.05626	5.08896	5.05156	5.054
CC2G_001430	4.81379	4.8885	4.93707	5.47342	5.50645	5.2706	5.38639	5.21863	4.771	4.52229	4.42031	4.34473	4.67769	4.40511	4.46882	4.82615	4.90051	4.9336	4.61723	4.36323	4.42706	5.21356	5.27355	5.00025	5.20448	5.30512	5.36899
CC2G_001431	3.8103	4.10764	3.99062	4.14595	4.32576	3.89271	4.34742	4.03456	3.6602	3.81936	3.71324	3.60033	3.95027	3.76274	3.78554	3.79045	3.74922	3.97751	4.04763	3.63787	3.50748	4.44346	4.56753	4.52273	4.43102	4.62458	4.69629
CC2G_001432	6.38273	6.34684	6.33186	6.75357	6.54056	6.18795	5.78995	5.82682	4.8736	3.54045	3.6644	3.98911	3.99591	4.44003	4.24164	5.25343	4.98145	4.17272	4.64143	4.59375	4.95196	5.08699	5.22127	4.86677	5.87679	5.86665	5.93512
CC2G_001433	6.15304	4.45301	4.03313	2.11792	2.87796	2.9254	0.723026	1.10985	8.1958	9.55988	9.10123	8.5873	5.50989	5.87898	4.17878	6.83935	7.2143	6.7444	5.91129	5.73434	5.5449	3.43566	3.19284	3.30919	2.96152	2.88209	3.1378
CC2G_001434	3.20523	1.38287	1.61359	0	0	0	0.21743	0	0.364536	1.18666	1.36888	1.24819	0.761768	0.943237	0.299184	1.27516	0.740045	0.638488	0.500916	0.170075	0.66241	1.04157	0.981853	1.04776	0.856533	0.590463	1.14787
CC2G_001435	8.33768	7.6361	7.87007	6.28236	6.18522	6.49277	5.98411	6.07361	7.24854	6.28672	6.71605	6.81022	6.54091	6.65261	6.69337	7.71084	7.54422	7.56476	6.88195	6.98434	7.16173	6.33307	6.24717	6.38377	7.55353	7.45181	7.76572
CC2G_001437	5.11879	6.15509	5.95077	4.60791	4.32576	3.95541	6.79599	6.7688	4.53201	4.63362	4.69414	4.48022	4.72454	4.53999	4.83484	3.98217	4.27675	4.01773	4.20899	4.09931	3.84241	4.87497	4.74464	4.54269	5.31511	5.35232	5.13943
CC2G_001438	7.14831	6.87738	7.04673	7.30389	7.33134	7.45792	8.93555	8.92079	6.60865	7.07309	7.13046	6.76117	7.31687	7.36813	7.28305	6.11554	5.89485	6.03879	6.53972	6.43909	6.13037	7.29198	7.27124	7.20812	6.99053	7.08671	6.89776
CC2G_001439	5.5122	6.41638	6.42527	6.5881	6.60787	6.18795	7.92793	7.77966	6.1957	6.71736	6.63122	6.45886	6.78988	6.8872	6.80834	6.53474	6.63488	6.54639	6.67816	6.49719	6.56975	5.94135	5.80887	5.72588	5.69119	5.50472	5.43805
CC2G_001440	4.51005	5.15906	4.97391	5.03282	4.27933	4.42291	4.63871	3.91306	4.42023	3.56658	3.8451	4.00605	4.07884	3.99965	4.10341	3.96208	4.13849	4.39895	4.62418	4.4525	4.24397	4.89506	4.59175	4.81027	5.22808	4.98401	5.03183
CC2G_001441	10.1959	9.79216	9.82442	7.40688	7.21898	7.45792	6.09469	6.14955	7.3307	6.44889	6.75593	6.76781	6.78858	6.85737	6.77912	8.80065	8.69467	8.57386	7.9164	8.06373	7.94375	7.54369	7.7423	7.62332	8.40408	8.24952	8.52233
CC2G_001442	3.20523	3.47632	3.41505	5.6276	5.11523	5.08679	4.74755	4.80582	4.93589	5.1907	5.18015	4.92228	5.37303	5.37467	5.37908	5.04485	5.06841	4.89093	4.61723	4.63429	4.54339	5.69342	5.82063	5.60137	5.22417	5.3088	5.00477
CC2G_001443	5.37414	5.15255	5.1059	2.11792	3.63598	2.49	4.96601	4.2631	3.37054	3.11395	3.25828	3.39273	3.34223	3.28791	3.25196	3.95702	4.18859	4.2209	4.18567	3.94378	3.81281	4.74496	4.86025	4.83745	3.76188	3.46119	3.80418
CC2G_001444	5.06457	4.36569	4.35699	8.70361	9.54545	8.38999	5.57542	5.71765	7.78169	7.79167	7.86386	8.32379	8.28686	8.67558	8.422	8.77047	8.59585	8.31785	8.554	8.4378	8.233	7.87748	7.73765	7.93217	8.39107	8.50061	8.53775
CC2G_001445	3.18843	1.83697	2.77893	0	3.21045	3.89271	3.11187	2.9295	4.14349	4.43514	4.67577	4.83016	4.65795	5.07481	4.97093	5.12156	5.37673	5.17725	5.0376	4.95551	4.95738	5.13365	4.93248	5.11356	6.48163	6.64271	6.90021
CC2G_001446	2.7122	3.43402	3.37153	4.00298	3.90423	4.77543	4.41498	4.51355	5.09603	5.56159	4.81374	4.69393	4.84665	5.89585	5.15014	6.08336	6.89201	6.65319	5.87239	5.69307	5.89071	3.8546	3.86149	3.88444	5.00495	4.89363	5.04074
CC2G_001447	7.56352	7.41064	7.52259	6.40117	6.80101	6.63361	5.80262	5.57472	6.30727	6.14358	6.19922	5.96479	6.16589	6.14076	6.14032	6.39939	6.39664	6.33881	5.95194	5.64518	5.77879	5.8339	5.86673	5.93413	5.54855	5.4853	5.92312
CC2G_001448	4.09808	7.75791	7.5176	2.58761	4.18173	4.07317	3.16516	3.40556	3.22289	4.53999	3.8341	3.96621	3.23973	3.84611	3.63311	3.71444	3.54545	3.36413	4.22737	3.932	4.31749	5.53412	6.03138	5.76746	7.55586	7.81726	8.03736
CC2G_001449	5.98808	6.02578	6.12467	7.10819	7.25541	7.30983	8.9269	8.79959	6.80872	7.38049	7.11237	6.85843	7.32271	7.59553	7.41261	6.91574	7.15108	6.99099	6.89853	6.80224	6.91448	6.94823	6.97433	6.96111	7.41134	7.53599	7.44175
CC2G_001450	3.06499	3.53753	3.13177	2.11792	3.21045	3.35552	3.75754	3.49296	3.00773	4.11923	3.52772	3.65863	3.26232	3.41816	3.18956	2.76347	3.396	3.00259	2.95613	2.44405	3.23131	3.05166	3.39514	3.42841	3.55355	2.99622	3.60235
CC2G_001451	8.28875	7.91993	7.99272	5.89389	5.7127	5.91579	7.96127	7.90147	5.79377	5.95364	5.9431	5.85532	6.32276	6.21096	6.32583	5.24098	4.93704	4.80735	5.657	5.31647	4.85652	6.56848	6.80855	6.58964	7.0054	7.33375	6.96717
CC2G_001452	5.15815	5.25329	5.04488	4.00298	4.9472	5.34273	4.8241	4.69959	4.84502	4.11923	3.91983	3.71467	4.21243	4.15252	4.42306	4.65529	4.92573	5.04484	5.39765	5.28209	5.59272	4.56671	4.48495	4.75716	4.25079	4.39416	5.03183
CC2G_001453	6.42099	6.94483	6.84475	5.89389	5.56568	5.89994	5.76428	5.82261	5.61068	3.55792	3.73114	4.83333	3.7781	4.12417	3.98243	6.57001	6.26003	5.65156	5.57143	5.84368	6.04127	5.94135	6.20405	6.03385	6.5827	6.53668	6.632
CC2G_001454	0.971684	1.19301	1.53688	4.39534	5.21727	4.23354	4.47952	4.39375	5.717	5.21018	5.21449	5.11679	5.82642	6.04318	6.08752	5.05437	5.62224	5.56938	5.3481	5.20344	5.48422	5.23399	5.13678	5.1552	6.26871	6.0452	6.05209
CC2G_001455	2.33859	2.50152	2.40019	6.68497	7.23731	6.59476	6.25383	6.19913	8.14175	7.48582	7.4928	7.51072	7.80402	8.3063	8.43383	7.4178	7.88709	7.80744	7.71939	7.77201	8.10663	7.62759	7.74885	7.66071	8.60518	8.57328	8.64425
CC2G_001456	4.54347	3.0971	3.32666	6.21907	6.09427	5.36599	7.28705	7.42977	7.0023	7.02127	7.38105	7.47213	7.09576	6.82324	7.15477	7.69114	7.81685	8.02994	7.28883	7.39098	7.34922	7.61855	7.54243	7.64694	6.12529	6.41883	6.56873
CC2G_001457	6.57759	7.05534	7.14208	6.902	7.43558	7.81565	6.46779	6.61413	6.10523	5.79872	5.91597	5.61516	5.90148	6.09279	5.69366	5.91464	5.73546	5.54722	4.84862	4.935	4.81233	5.65353	5.83229	5.72588	4.59728	4.40109	4.47753
CC2G_001458	4.01475	3.9364	3.68766	3.22523	3.56033	3.95541	5.52024	5.13279	5.61914	7.13407	6.83254	6.83571	6.59307	6.40902	6.70696	6.74772	7.08037	6.71106	6.68566	6.6497	6.74143	5.57028	5.30528	5.44932	7.50687	7.48639	7.48237
CC2G_001459	4.54347	2.72847	3.39345	6.88171	6.0396	5.91579	9.31883	9.2355	6.39858	7.48297	7.24233	7.53767	7.72084	7.82459	8.1249	5.7589	5.57086	6.0129	6.10147	6.16247	6.22444	8.44075	8.64097	8.52439	6.25538	6.8555	6.21444
CC2G_001460	8.0109	8.41661	8.46403	5.72193	5.69512	5.49821	6.72234	6.79053	5.49129	5.96515	6.12558	5.9208	6.14376	6.04445	6.3857	5.67501	5.67321	5.6627	5.26153	5.28672	5.01831	6.01404	6.15613	6.1748	6.48326	6.43579	6.25136
CC2G_001461	7.10532	7.98913	7.83044	6.68497	7.08367	6.83043	7.2397	7.31453	5.81602	6.64357	6.2425	6.10505	6.38841	6.54266	6.43264	5.83542	5.84646	5.7202	6.19318	5.98433	5.97331	7.07822	7.05992	6.90504	7.61672	7.44847	7.31896
CC2G_001462	8.25132	8.23837	8.21212	5.6276	6.10762	5.73104	6.26303	6.34721	5.72094	5.61265	5.73858	5.77688	6.10575	6.32433	6.09362	7.06387	6.81313	6.76005	6.68233	6.73351	6.78858	5.60206	5.64822	5.76322	5.09325	5.3198	5.12274
CC2G_001463	5.59422	6.35819	6.14096	5.72193	5.76418	5.34273	6.96892	6.69469	5.12008	5.63958	5.55984	5.72155	5.86751	6.08301	5.63298	5.78772	5.63202	5.43102	6.0776	6.05526	5.99457	5.88504	5.95341	5.91128	4.93975	5.15757	5.0584
CC2G_001464	5.11435	5.05823	4.98116	4.00298	4.02171	4.46662	5.16226	5.29358	4.30955	4.46786	4.34869	4.53571	4.71092	4.65014	4.7385	4.24578	4.38649	4.38364	4.79416	4.41492	4.53978	4.87207	4.77517	4.94384	3.95335	3.62391	4.02677
CC2G_001465	8.13776	8.68132	8.81158	8.05844	8.37732	8.2312	6.19739	6.2502	7.49144	7.39515	7.61992	7.65956	7.6078	7.76003	7.79778	8.70928	8.46495	8.2739	7.62979	7.93282	7.81713	5.96055	6.06267	6.04205	6.28568	6.48059	6.34964
CC2G_001466	2.51067	3.29913	3.18301	3.22523	1.5387	2.1038	1.56165	1.49574	2.48529	2.13859	2.07724	2.08781	2.11396	2.24763	1.67322	1.39986	2.07297	1.96156	1.56411	1.55548	1.51839	2.4513	2.07442	1.91649	1.27423	1.64342	1.49764
CC2G_001467	8.32091	8.70763	8.58148	8.87764	8.71919	8.91064	10.6119	10.4462	7.72499	8.04698	7.85267	7.7645	8.03745	8.19599	8.02729	7.73656	7.95212	7.53692	7.79915	7.72116	7.5986	7.57294	7.5092	7.39216	7.76523	7.67028	7.6591
CC2G_001468	4.09808	2.5812	2.90637	7.85491	8.01599	8.28711	4.26438	4.14663	7.34097	5.67003	6.01791	6.01447	6.26801	6.32641	6.12254	7.24933	7.32613	6.67142	5.57502	5.61235	5.73999	4.64339	4.88846	4.79925	7.47189	6.88048	8.00415
CC2G_001469	2.8252	3.92117	3.79037	0	1.18283	0	0.723026	0	0.781292	0.942409	0.86286	0.907104	0.629023	0.807195	0.708172	2.13316	2.07297	1.96156	1.59276	1.75584	1.87991	2.26971	1.71989	2.29152	0.591369	0.139006	0.490867
CC2G_001470	5.28607	9.43576	9.29333	4.87754	7.37615	5.65753	3.53268	2.76366	4.4957	2.95154	2.34857	3.33133	1.6941	2.39729	1.89055	7.75602	7.94541	7.64118	5.56963	5.51505	5.86785	2.83098	2.80006	3.04575	0.591369	1.33181	0.591308
CC2G_001471	5.30568	6.3005	6.49536	6.75357	6.56979	6.44986	8.02122	8.21116	5.75973	5.94371	5.41049	5.21961	5.57449	6.07932	5.9797	5.26782	5.72375	5.87465	5.44359	5.23254	5.59446	6.20323	6.09692	6.1598	5.42127	5.68854	5.71347
CC2G_001472	1.54708	1.62771	1.27872	2.11792	1.82392	1.86343	0	0.994777	1.00442	1.39548	1.24147	0.700615	1.0656	0.758839	0.985067	0.98787	1.16653	1.11707	1.31182	1.13002	1.03485	5.80688	6.13627	5.99334	4.59123	6.05621	5.29645
CC2G_001473	5.41804	5.00865	5.13222	5.76688	5.44467	5.71301	7.05615	6.9065	5.65251	5.5176	5.84103	5.83176	6.00109	5.99833	6.41911	5.23262	5.71194	5.83158	5.3502	5.21077	5.01831	6.30652	6.39115	6.46358	4.41741	4.6995	4.43761
CC2G_001475	6.23305	5.64036	5.63834	6.51093	6.28259	6.13477	7.07368	7.11201	6.26745	6.86595	6.37552	6.34586	6.36251	6.62506	6.20822	6.39471	6.73877	6.45231	5.95608	5.77447	6.28715	6.08948	5.94806	6.04672	5.12711	4.89853	4.98644
CC2G_001476	6.48259	6.69238	6.91463	5.52667	5.99719	6.0367	3.79183	3.83157	7.09774	7.98616	7.69746	7.26372	6.43554	6.19628	6.96955	5.96723	6.1041	5.8842	6.14564	6.1675	6.79692	6.41588	6.79669	6.59443	6.54875	6.65	6.63935
CC2G_001477	6.22278	5.96766	5.94336	7.58059	7.49266	7.47407	8.30856	8.33977	7.31516	7.05704	7.25218	7.18223	7.14319	7.16627	7.34059	7.2653	7.07935	6.95455	6.66641	6.65508	6.61248	7.18177	7.42119	7.48276	8.02525	8.12229	8.09356
CC2G_001478	7.45619	8.48295	8.63652	3.66589	4.23136	2.49	3.05653	3.07823	3.59306	3.47756	3.42883	3.77521	3.42465	3.57301	3.89574	3.50828	3.41555	3.41019	3.16131	3.43586	3.27539	4.45897	4.46261	4.71087	2.50116	2.44637	1.59763
CC2G_001479	10.0895	11.2504	11.2719	8.20447	9.53807	9.11497	4.76491	4.58492	7.49374	5.44432	4.51288	6.90207	4.09571	5.92764	4.58073	10.6735	10.7748	10.5967	8.36245	8.40196	8.36711	4.00484	4.34539	4.03293	2.78187	3.84311	4.23517
CC2G_001480	8.67124	8.69538	8.8748	6.53712	7.58144	7.16482	5.17531	5.02694	6.24301	4.23783	4.58355	5.58916	4.69717	4.63012	4.96295	8.86189	9.14491	9.08776	6.06103	6.2994	6.42268	4.63999	4.71659	4.64162	4.65064	4.77606	5.04074
CC2G_001481	6.01929	6.44861	6.36274	0	4.13034	4.42291	2.99899	3.61488	4.1317	4.10146	4.31744	4.12971	3.85442	3.82277	4.07411	4.74913	4.94155	4.90975	4.14756	4.20095	4.27903	4.86335	4.97256	5.11356	3.42333	3.44788	4.13056
CC2G_001482	0.805329	0.567895	0.708306	0	0	0	0	0	1.19762	1.39548	1.36888	1.28567	1.2577	1.77503	1.84501	0.285108	0.610329	0.474761	0.161699	0.459801	0.552061	3.92889	3.65367	3.87398	2.67147	2.90175	2.64818
CC2G_001483	6.70415	6.39724	6.59569	6.37237	6.80101	6.91172	7.18753	6.98397	5.96951	6.51414	6.48944	6.31673	6.55546	6.53909	6.30496	5.88427	5.9484	5.71562	6.6027	6.46486	6.38997	6.10928	6.12089	6.13591	6.41294	6.1496	6.50578
CC2G_001484	3.76569	3.53753	3.43632	0	1.18283	1.21373	1.30097	1.31566	1.00442	1.8853	1.94034	2.04474	1.75907	0.943237	1.10584	2.13316	1.84204	1.87662	2.16954	1.52445	1.42755	0.612809	0.755516	0.848389	5.10179	5.09917	5.13527
CC2G_001485	0.279274	0.974322	0	4.00298	3.30619	3.68642	1.84902	1.21642	5.21804	4.88625	4.49554	4.68343	4.54274	4.98044	4.98674	5.11929	5.0393	5.24023	4.63799	4.56354	4.68412	1.95657	2.16945	1.85397	2.3659	2.64607	2.36575
CC2G_001486	4.29929	3.6891	3.91685	2.11792	2.87796	2.1038	3.84179	3.33634	2.90073	3.52276	3.94561	4.205	4.74339	4.27792	4.3758	4.22486	3.80958	3.42522	3.86005	4.06736	3.88855	4.81896	4.74464	4.86941	2.24775	1.68939	1.44492
CC2G_001487	4.04307	3.82624	4.31165	2.58761	3.21045	1.86343	3.19109	2.99085	2.19955	2.20665	2.23609	1.97762	1.99313	2.13847	2.28096	2.55131	2.30031	2.61391	1.94354	2.249	1.9685	2.35509	2.25861	2.52345	0.49092	0.772326	0.685209
CC2G_001488	6.75639	7.56193	7.66344	4.39534	4.53784	4.66722	4.49	5.04874	4.1317	4.10146	4.18951	4.18531	4.31322	4.06076	4.25911	4.32262	4.50072	4.45495	4.10345	4.18119	3.79475	4.35916	4.68155	4.77976	5.94482	5.1203	6.54388
CC2G_001489	5.37785	5.56886	5.45765	5.52667	5.44467	5.05851	6.10495	6.4215	5.26194	5.58522	5.24595	5.17786	5.64063	5.61094	5.51979	5.19008	5.3684	5.36629	5.44359	5.23494	5.14251	4.95646	4.8198	5.07067	4.38279	4.44194	4.19583
CC2G_001490	1.12082	2.37308	2.5246	3.46232	3.56033	3.44562	2.77732	2.86543	5.97282	5.9337	6.196	6.31899	5.33269	5.45465	5.4868	4.71952	5.12888	4.89633	5.32053	5.26811	5.20082	4.66362	4.80804	4.83475	3.90538	3.8633	3.5027
CC2G_001491	4.4689	4.79132	4.89158	2.58761	2.06196	3.04553	2.96933	2.26472	3.20051	3.44974	3.65818	3.68692	3.4899	3.32159	3.59921	3.39298	3.67005	3.88268	3.62371	3.63787	3.30121	3.69345	3.72423	3.75357	3.40964	3.65899	3.54088
CC2G_001492	5.92355	6.26173	5.92842	5.30077	5.2417	5.53972	8.50802	8.37255	4.7403	5.72134	5.25009	4.98913	5.42401	5.78854	5.37308	4.5848	4.95497	4.71862	4.81862	4.81509	4.53978	4.45123	4.19087	4.14161	5.1561	4.90828	5.30757
CC2G_001493	5.76826	6.64913	6.41726	5.03282	4.07705	4.59029	7.19235	7.01568	4.61896	5.54634	5.19097	4.96044	5.31299	5.59036	5.2518	4.23745	4.55756	4.48396	5.48811	4.85929	5.29376	5.15286	5.21014	5.41545	4.87148	4.80766	4.59105
CC2G_001496	4.25962	3.6891	4.3345	5.47342	5.93864	6.43894	5.26348	4.97476	4.85938	4.40649	4.77975	4.96334	4.96382	4.97251	5.19167	4.65216	4.83669	4.4659	5.50139	5.55783	5.45577	3.68028	3.72423	3.68937	4.70209	4.12819	4.21956
CC2G_001497	2.24419	2.61945	1.94579	0	1.18283	0	0	0.220902	1.10425	0.831819	1.02641	1.3222	0.761768	0.708806	0.898542	0.947576	0.933267	0.585951	1.20454	1.00068	1.39595	0.304762	0.486941	1.15537	0.38295	0.855326	1.27412
CC2G_001498	6.21242	5.86791	6.04727	5.57802	5.03366	4.74026	5.50482	5.37637	5.41072	5.91178	6.0971	6.26841	6.40118	6.56832	6.46311	6.0385	5.92244	5.9297	6.3988	6.23974	6.17875	7.25635	7.34129	7.39354	6.51558	6.64854	6.66694
CC2G_001499	3.42197	2.92453	3.30369	8.16303	7.37615	7.06173	6.39157	6.6383	6.00546	4.59181	4.72721	4.68343	4.45723	4.17572	4.24603	6.99696	6.6834	7.01975	5.85475	5.77612	6.25007	4.3001	3.73048	4.09732	3.80435	3.44788	3.56578
CC2G_001500	1.99645	1.96131	2.00394	2.11792	2.26623	1.21373	1.20244	0.732788	4.08359	4.05914	4.21941	4.22925	4.41417	4.47413	4.16494	4.80658	4.85589	4.27583	4.29431	4.6913	4.77903	3.26083	3.06025	2.65151	3.45033	2.62257	3.43673
CC2G_001501	3.47836	4.97217	4.6489	2.94136	0	0	0	0.869721	2.44778	1.57786	1.59422	2.12964	1.93808	2.11945	1.9347	3.12137	3.1691	2.76334	2.85333	2.04542	2.53065	2.33841	2.32616	2.14255	1.90151	1.89954	1.82092
CC2G_001502	9.50194	9.14835	9.21624	8.38831	8.71483	8.66549	8.13745	8.24145	8.46413	8.53074	8.46269	8.48855	8.41922	8.47645	8.49155	9.76284	9.76217	9.58625	8.70083	8.70136	8.69401	8.0901	8.21654	8.09082	8.94836	8.86346	9.00419
CC2G_001503	9.70146	9.72987	9.65441	9.75861	9.29574	9.51816	12.2008	12.1744	8.45648	9.05082	8.88877	8.91633	9.14136	9.08632	9.09141	8.7151	8.83346	8.6317	8.72549	8.6944	8.60051	8.38322	8.4331	8.29825	7.64475	7.77392	7.30053
CC2G_001504	3.30213	4.70502	4.63976	2.11792	1.82392	2.65018	1.78237	1.57799	2.36968	2.59313	2.05846	2.96618	2.61292	2.48908	1.9347	2.56469	2.22843	2.35602	2.24367	2.0885	2.22378	9.56097	9.43997	9.71226	6.17672	7.17418	6.45836
CC2G_001505	5.17104	5.11957	4.72003	5.76688	5.06137	5.36599	8.8379	8.4394	4.60199	5.8368	5.26655	5.05573	5.32019	5.57996	5.30323	4.11545	4.77748	4.66581	4.6753	4.31417	4.56131	4.35916	4.04812	4.14597	4.59123	4.30839	4.77848
CC2G_001506	5.85865	5.31286	4.99557	4.70349	4.27933	5.05851	5.81518	5.95163	5.20686	5.20741	4.78262	4.76531	4.73803	4.91575	4.47631	3.99705	3.91864	4.1816	3.95137	3.78262	3.74545	3.86628	3.54444	3.49137	3.01676	3.03234	2.96136
CC2G_001507	3.18843	2.69304	2.00394	3.46232	3.21045	3.2594	2.29391	1.57799	4.10785	4.64593	4.46378	4.38845	4.77777	4.73383	4.57725	4.31472	4.15797	4.25073	3.58858	4.19604	3.74545	3.84282	3.95515	4.18881	3.35354	2.88209	3.21854
CC2G_001508	1.8757	1.70089	1.61359	5.36065	5.14143	5.11452	4.3703	4.07761	6.13208	6.45473	6.59013	6.68257	6.57138	6.51563	6.49755	6.30885	6.2021	5.85397	6.64006	6.88169	6.67799	5.79928	5.82647	5.73891	5.22417	5.14112	5.0584
CC2G_001509	1.31909	1.29106	1.53688	2.11792	2.44513	3.04553	1.56165	2.21418	1.95408	1.7088	2.16764	3.09844	1.88084	1.95749	1.72442	1.62094	1.74235	1.7629	1.72804	1.78232	1.73591	9.01321	8.93999	9.00475	10.8278	10.6144	10.6891
CC2G_001510	6.0264	4.56504	4.98116	9.44956	8.35511	8.75853	6.49145	6.34428	6.97948	4.8897	4.79117	4.62249	5.30032	5.21134	4.87222	4.88335	5.0224	4.58446	5.1137	5.43803	5.41694	5.18119	5.3807	5.26339	6.02334	5.40493	6.05868
CC2G_001511	1.18999	1.62771	1.61359	5.67554	5.48615	5.67626	4.12339	3.38285	6.12021	6.57656	6.76175	6.76366	6.6591	6.63514	6.58066	6.22178	6.07776	5.89098	6.74509	6.91498	6.70241	5.92049	5.93459	5.76746	5.20844	5.13698	5.20826
CC2G_001512	4.85164	5.97136	5.99804	5.36065	6.06719	6.14825	7.71102	7.47206	5.93942	6.06936	5.80205	5.97199	6.26148	6.73616	6.32997	4.878	5.07457	4.79293	5.11864	4.94675	4.91621	3.31298	3.2891	3.04575	6.32996	6.41028	6.2967
CC2G_001513	8.62633	9.12195	9.25043	7.17641	7.76113	7.74199	5.35233	5.5697	6.24301	5.61056	5.23554	5.56078	4.68885	5.33193	4.66832	7.74357	7.94513	7.42173	5.51455	6.26695	6.1671	8.76809	9.45326	8.71196	8.9051	9.17754	8.81981
CC2G_015285	0.714357	1.55062	1.61359	0	0	1.21373	0	0	0	0	0	0	0	0	0	0	0	0	0	0	0.159041	0.719702	1.10236	0.400752	1.27423	1.07902	1.21238
CC2G_001514	4.93961	6.00425	6.07466	5.97275	5.26571	4.77543	8.50996	8.44352	5.92242	8.88071	8.00541	7.91185	7.07252	8.25493	7.23199	7.34889	8.29438	6.85469	7.56936	7.39795	8.10388	7.68684	7.39783	7.39491	9.25512	8.85624	9.31285
CC2G_001515	0.279274	0.402256	0.561119	0	0	0.730907	1.91274	1.49574	1.00442	1.77006	1.33807	1.0877	1.34493	1.99972	1.32072	2.02113	1.67905	1.38649	1.85171	2.00102	2.18733	0.91231	0.850352	0.760228	1.82105	1.27265	1.64513
CC2G_001516	0.400949	0	0.397192	0	1.82392	1.86343	2.77732	3.04969	2.05733	2.35399	2.46723	2.55497	3.32087	2.87667	3.02572	2.84251	2.75378	2.98241	2.75537	2.82134	2.88947	5.73543	5.47487	5.78711	3.5157	3.99726	3.3817
CC2G_001517	0.279274	0	0	0	0.709386	2.49	3.57268	3.02057	1.52032	1.23091	1.20778	1.17018	1.47954	1.41827	1.50771	1.54195	1.19697	1.8322	0.918025	1.67335	1.36365	2.0207	2.25861	2.17701	0.856533	0.772326	0.490867
CC2G_001518	3.8103	2.72847	2.81186	3.46232	3.48049	2.79434	4.27654	4.2631	2.00663	2.9647	2.86319	3.0004	3.33515	2.74633	3.63979	2.82036	2.56827	2.72741	2.49199	2.78252	2.75894	4.19285	4.17263	4.01399	2.60093	2.84195	2.30789
CC2G_001519	5.57172	5.43049	5.65204	3.84426	4.91719	4.84331	4.13679	4.23801	4.59342	5.1935	5.57973	5.40771	5.51929	5.50132	5.11938	5.81457	5.71982	5.54722	5.58931	5.6325	5.28301	4.41987	4.39343	4.34472	7.59948	7.29153	7.59628
CC2G_001520	6.34342	6.1841	6.21053	5.47342	5.19243	5.71301	4.18919	4.81433	5.41558	4.92717	5.52093	5.36019	5.31119	5.29001	5.26699	6.2323	6.15345	5.89773	5.57861	5.69481	5.56102	4.51199	4.80508	4.58501	7.8708	7.80818	8.0785
CC2G_001522	6.11798	5.76076	5.74022	5.36065	5.21727	5.45547	5.73373	5.8477	4.9891	5.21294	5.12932	4.94002	5.01792	5.32156	4.69424	5.05199	5.49018	5.19928	4.82467	4.38931	4.23952	4.83688	4.44752	4.51602	3.6844	3.87329	3.70679
CC2G_001524	1.25598	0.402256	0	0	0	1.21373	0.982555	0.869721	1.59085	1.8853	2.11408	2.45981	2.14671	1.59393	1.64692	2.13316	1.59009	1.61343	1.94354	1.49273	1.57592	1.1602	0.705653	0.890529	0.935096	0.382322	0.490867
CC2G_001525	1.12082	0.71646	0.964086	0	1.5387	1.21373	0.858618	0.732788	0.517227	1.18666	1.10171	1.17018	0.921666	0.943237	0.806495	1.45839	1.49528	1.6901	1.24119	1.46029	1.11467	0.770318	0.544805	0.848389	1.08044	1.73394	0.685209
CC2G_001526	3.40753	3.51742	3.57707	4.39534	6.06719	5.51911	3.24159	3.28828	4.91542	5.35966	5.3881	5.26019	3.97783	4.32018	4.31028	4.77238	4.89356	4.5159	4.47444	4.61601	4.5216	3.17889	3.07014	3.23754	3.06996	3.57577	3.18678
CC2G_001527	0.279274	0.567895	0.708306	2.11792	1.82392	1.21373	0.858618	0.732788	1.52032	1.61173	2.53672	2.55497	1.60266	2.15725	1.50771	1.42942	1.3938	0.918933	1.85171	1.97829	2.0721	1.97827	1.47402	1.83251	3.59043	3.93183	3.80418
CC2G_001528	0.279274	0	0	0	2.44513	1.86343	0.723026	1.21642	1.72235	4.55747	4.96005	4.64429	4.26929	4.21658	4.39962	3.28393	2.85271	2.4324	2.09139	3.18111	0.993226	0.371859	0.363748	0.616978	0.139254	0	0.266211
CC2G_001531	5.90052	5.85595	5.5726	6.79756	7.11044	7.12446	5.77288	5.87236	6.3151	6.03077	6.44585	6.30309	6.14173	6.01772	6.79268	6.00944	6.21982	6.28318	5.85771	5.8247	5.81657	5.54687	5.62326	5.78851	6.34083	5.82865	6.43321
CC2G_001532	0.617261	0.402256	0.964086	3.22523	1.82392	0.730907	0.406341	0.412428	0.517227	1.23091	1.48595	1.35783	1.28737	1.02729	0.985067	1.06523	0.896637	1.58694	0.824501	1.08818	0.60829	0.556239	0.755516	0.565884	0.591369	0.382322	0.382908
CC2G_001533	2.98941	3.12395	3.28035	4.50553	4.61465	4.33133	6.7312	6.52103	3.48608	3.93756	4.03478	4.15525	4.7191	4.20309	5.35288	2.16865	2.56827	3.13648	3.39884	3.13048	2.99868	7.98887	7.88249	7.93185	6.59183	7.09953	6.62016
CC2G_001534	5.10542	5.11957	5.18973	5.17301	5.33545	5.02966	5.88037	6.00836	4.73252	5.55725	5.38056	5.37331	5.21025	5.32364	5.31997	5.0591	5.05808	5.12987	5.24358	5.44219	5.45768	5.34878	5.10588	5.36403	4.70209	4.93237	4.46435
CC2G_001537	0.617261	0.402256	0	2.11792	2.60428	2.49	1.20244	1.31566	1.6581	2.81285	2.40912	2.22918	2.28549	2.44391	2.22872	0.72727	1.03788	1.50442	1.80351	2.44405	2.58771	1.40409	1.47402	1.54655	1.54862	1.27265	1.27412
CC2G_001538	0.714357	1.19301	0.561119	0	2.87796	1.21373	1.78237	2.65416	2.59232	3.83378	4.13229	3.83331	3.86921	3.62789	3.83297	3.02785	2.88111	3.21642	3.96786	3.75614	3.71377	4.19285	4.40519	4.41498	3.28019	3.10198	4.06221
CC2G_001539	1.8331	1.77053	1.53688	0	1.82392	2.1038	0.982555	0.581482	1.89954	1.96606	2.37916	2.06644	2.13043	1.79914	1.79798	1.51463	1.63526	1.50442	2.36489	2.30486	2.16875	1.26981	1.17745	1.04776	1.73583	1.14649	1.49764
CC2G_001540	5.76543	5.57374	5.64292	5.93386	6.0396	6.10742	3.42755	3.78037	5.43009	4.85124	5.3881	5.16032	5.76579	5.56774	5.62963	5.76035	5.57376	5.71715	6.04298	5.67198	5.90621	6.92049	7.10148	7.07969	7.75308	7.71749	7.64603
CC2G_001541	2.45556	3.04184	3.02347	0	0	0	0.573356	0.220902	0.897165	0.773174	0.348097	0.644021	0.200442	0.230242	0.3652	0.863446	0.968989	0.918933	0.500916	1.00068	0.552061	0.435973	0.755516	0.512912	1.54862	1.27265	1.14787
CC2G_001542	0	0	0	2.11792	0	1.86343	1.20244	1.21642	2.05733	3.44974	2.98753	2.62974	2.85008	2.75867	2.50248	2.13316	2.45946	2.54678	3.3743	3.15095	3.41592	3.45899	3.02002	3.06428	2.39399	2.18273	2.44842
CC2G_001543	0	0	0.397192	0	1.5387	1.21373	0	0.220902	1.52032	1.96606	1.81168	1.55489	1.45361	1.18199	1.21728	1.96167	1.78306	1.96156	2.26162	1.80832	2.22378	0.719702	0.803713	0.931472	1.0096	0.684258	0.935008
CC2G_001544	0.146384	0	0	2.58761	1.5387	1.86343	1.20244	0.581482	1.52032	1.79975	1.4286	1.49215	1.4272	1.35461	1.44804	1.33886	1.10364	0.918933	1.98735	1.72887	1.54744	0.160414	0.297968	0.0750068	0	0	0
CC2G_001546	6.12903	6.67886	6.6261	6.4294	7.43558	7.33951	6.81069	6.77099	6.89837	6.85273	6.9268	6.88233	6.8111	6.74937	6.85503	7.03952	7.00386	7.11784	7.17028	7.30284	7.245	7.00018	7.02603	7.07969	8.23824	8.17373	8.3623
CC2G_001547	5.40719	5.75648	5.69681	4.39534	5.54621	5.49821	4.63871	4.54457	5.16701	4.92717	5.15164	5.10373	4.99338	5.03729	4.92515	5.09182	4.91203	5.21017	5.41379	5.33224	5.42087	5.10928	5.15779	5.2371	6.4232	6.20406	6.52654
CC2G_001549	6.59523	6.77519	6.92971	6.31299	6.81735	7.23599	4.55134	4.79726	7.30339	7.61562	7.91793	7.60732	8.05642	7.80537	7.97605	7.07735	6.94398	6.81029	7.5567	7.29021	7.28652	7.26631	7.31191	7.37835	7.40013	7.30174	7.33444
CC2G_001552	0	0.402256	0.212222	0	1.18283	0	0	0	0.655293	1.27385	1.30658	1.35783	1.40029	1.02729	0.602655	0.98787	0.968989	0.960797	0.671762	0.700961	0.714572	0	0	0	0.266241	0	0.382908
CC2G_001553	0.805329	1.46918	1.88519	2.94136	3.39597	2.49	2.08855	2.31356	3.54056	4.74843	4.87674	4.87696	5.15499	4.92673	5.1618	5.19654	4.74178	4.87185	5.14063	5.17874	4.90503	3.62634	3.98681	3.51177	3.08726	3.10198	2.96136
CC2G_001554	0.279274	0.402256	0	0	1.18283	0	0	0	1.19762	1.141	0.905518	1.04463	1.16484	1.62124	1.41725	0.678863	0.933267	1.18929	1.24119	1.17068	1.03485	0.819218	0.654004	0.341223	0.685278	0.933809	0.935008
CC2G_001555	3.27055	3.12395	3.2325	5.10462	4.88654	3.44562	4.55134	4.1865	6.54567	6.26427	6.08324	6.59943	6.3781	7.26911	6.74698	6.14702	6.08896	5.49297	7.01953	6.6773	6.91866	4.1457	4.64894	3.97536	4.39673	4.57646	4.54796
CC2G_001556	3.45044	2.89364	2.5246	2.94136	2.87796	1.86343	2.90812	3.21305	5.32537	6.33186	5.71329	5.97773	6.06029	6.76476	6.10091	5.89358	6.07161	5.31274	6.5128	6.37311	6.5239	4.75442	4.76912	4.67817	4.188	4.51397	4.11378
CC2G_001557	1.43759	1.70089	0.841857	2.94136	3.30619	3.89271	5.37512	5.01223	5.72878	5.21294	4.96005	5.29736	5.67891	5.93446	5.74725	5.50842	5.51153	5.35457	5.1503	4.78921	5.23916	4.6703	4.79915	4.36354	4.07977	4.04223	3.76171
CC2G_001558	1.78919	1.62771	1.75577	4.70349	5.65931	5.94698	4.86494	5.03425	5.96288	7.09869	6.95182	6.58729	6.74581	6.64764	6.8579	4.43982	4.76229	4.44023	4.90967	4.71898	4.8767	3.14093	3.20186	3.1361	2.55191	2.75816	2.42139
CC2G_001559	1.37955	1.0878	0.964086	4.87754	3.8417	3.35552	4.31242	4.37086	5.80864	6.32677	5.9609	6.04074	5.78672	6.1384	6.00968	4.20363	4.7236	3.70933	4.7084	4.05655	5.03636	2.482	3.09939	2.29152	3.60251	2.77957	3.1211
CC2G_001560	0	0	0.964086	0	0	0	1.09668	0	3.08307	1.7088	1.71905	2.39269	2.14671	2.54718	2.38009	1.87839	2.00577	1.53245	2.11133	1.67335	2.0721	0.612809	1.17745	0.804982	0.591369	0.772326	0.856451
CC2G_001561	1.25598	2.45996	2.00394	0	0	0	0	0	1.10425	0.942409	1.36888	1.88298	0.843931	1.35461	1.18108	1.6713	2.00577	0.738151	1.08864	1.00068	1.92489	0.234393	0.297968	0.71404	1.0096	0	1.82092
CC2G_001562	4.56315	4.16048	4.0191	6.15288	5.50645	5.49821	6.46779	6.39338	4.85222	5.91517	5.95964	5.8428	5.91817	5.77341	5.47377	4.53468	4.44156	3.96727	4.88961	4.71555	4.56841	5.44928	5.43718	5.41545	3.06996	3.65899	3.03455
CC2G_001563	2.66439	1.83697	1.61359	0	1.82392	1.21373	1.91274	1.86687	3.28803	3.86921	3.67677	4.02833	3.75705	3.57301	3.68573	3.1304	3.22187	2.37162	3.28056	2.92004	3.48513	2.21594	2.30957	2.03394	3.47684	1.89954	3.0166
CC2G_001564	7.15805	8.05951	7.91718	5.89389	6.69003	6.87975	6.71118	6.47347	5.66482	6.26294	6.0844	5.85064	6.02109	5.77341	5.87171	5.4609	5.49784	5.50008	5.94084	5.8717	5.80609	6.28275	6.20854	6.28158	7.69076	6.18614	7.1179
CC2G_001565	6.66217	6.7322	6.63303	5.85279	5.95351	6.14825	7.35599	7.49077	5.73269	6.10991	6.10513	5.73177	6.19749	5.96675	6.10695	5.60063	5.59535	5.61761	6.07633	5.82629	5.82993	6.2204	6.26342	6.31774	6.57199	6.0693	6.98228
CC2G_001568	4.41936	3.89022	4.10132	6.84025	6.27077	6.33667	5.20742	5.29358	6.60439	7.12311	7.05016	6.98273	7.28781	7.38715	7.36096	6.4253	6.51992	6.61273	6.89135	6.60497	6.64308	6.88144	6.96376	6.85071	6.61885	6.32912	6.08906
CC2G_001569	4.42654	5.73486	5.88652	6.04752	6.21018	5.67626	5.72044	5.52374	6.05621	7.02206	6.76826	6.79324	6.95554	7.18869	6.97617	6.52622	6.61599	6.53777	7.27176	7.23915	7.16818	7.14148	7.16051	7.07227	7.89986	7.78983	8.01549
CC2G_001570	3.2545	3.7593	3.30369	3.46232	2.7476	2.49	1.47988	1.65581	4.63574	5.38191	5.34613	5.24124	5.30576	4.8624	4.80244	4.84273	4.52192	4.39132	5.99281	5.70177	5.4287	3.75129	3.59325	3.27778	3.39582	3.4072	3.62622
CC2G_001571	0.513155	2.07578	2.11366	2.58761	1.82392	1.21373	5.0534	5.11912	4.73252	4.15986	3.92503	4.30877	4.42422	4.47038	4.80542	4.63323	5.29992	5.63872	6.37838	6.37855	6.44601	4.86044	4.54644	4.56888	5.14375	4.76536	4.96788
CC2G_001573	4.15972	5.35881	5.80299	4.60791	3.77633	4.37785	6.44642	6.4215	3.85907	3.84806	3.4506	3.47615	4.04015	3.93039	3.90687	3.25945	3.34932	3.32459	3.52311	3.5248	3.45478	3.70651	3.52301	3.70125	4.39673	4.55799	4.83078
CC2G_001574	5.9636	6.05747	6.13121	7.12555	7.45137	7.22331	8.36517	8.43113	6.69524	6.64765	6.9268	6.76449	7.54892	7.51639	7.25721	6.40591	6.28238	6.24874	6.70218	6.5693	6.57594	7.44197	7.47054	7.60129	7.7806	7.93165	8.10847
CC2G_001575	1.74391	3.04184	2.40019	2.11792	1.5387	1.57485	0.406341	0.581482	1.72235	1.82883	1.59422	1.17018	1.53006	1.67434	1.84501	1.13865	1.31271	1.55995	1.04784	1.32274	1.68453	0.91231	0.426659	0.616978	0.773445	0.490143	0.856451
CC2G_001578	0	0	0.561119	0	0	0	0.406341	0	4.02111	3.33278	3.14714	3.56266	2.62459	2.63016	2.13721	2.86432	2.69099	2.65274	3.25391	3.17113	3.50748	2.64005	2.80006	2.57605	2.18483	2.88209	1.90138
CC2G_001579	1.91709	2.12978	1.88519	3.84426	4.53784	5.02966	4.62926	4.54457	4.70893	4.72542	4.72126	4.66222	4.49903	4.48903	4.51681	3.98715	3.73373	3.9043	4.97097	4.97859	4.97353	4.43171	4.43227	4.51938	4.29614	4.12819	3.99045
CC2G_001580	8.88901	8.62368	8.67058	7.44886	7.37615	8.02743	8.29816	8.34271	6.60652	5.38925	5.30091	5.09584	5.43896	5.62787	5.60423	5.08255	5.12096	5.16163	5.46699	5.26106	5.39313	4.76382	5.71905	4.69015	6.41637	6.4341	6.81839
CC2G_001581	1.64885	1.77053	1.88519	0	1.82392	0.730907	0	0	1.36797	0	0.218754	0.459556	0.136673	0	0.157334	0	0.252771	0.1523	0.307087	0.858588	0.493552	0.304762	0	0.341223	2.50116	2.04807	2.92333
CC2G_001582	4.56966	2.69304	3.05131	6.34299	6.09427	5.85132	6.82111	6.87634	6.30988	6.67494	6.86533	6.67905	7.01605	6.84657	7.07872	6.10413	6.36598	6.64197	6.47387	6.32552	6.20862	6.65268	6.68613	6.79425	4.86145	5.16165	4.90096
CC2G_001583	5.03198	6.27975	6.07127	5.30077	3.96417	4.90814	6.14198	6.12582	4.67686	5.26707	5.39186	5.20502	5.47486	5.41814	5.43587	4.34606	4.30148	4.41033	5.23906	5.27045	4.91621	5.57028	5.84962	5.83511	4.49077	5.12867	4.70752
CC2G_001584	2.03456	1.62771	2.05985	4.00298	4.79049	4.28326	2.63346	2.61573	4.65233	3.56658	3.63301	4.09319	3.05371	3.02715	3.37723	4.72846	4.795	4.71862	4.38309	4.55204	4.38744	2.85463	3.09939	2.9887	2.11905	2.54967	2.67131
CC2G_001585	3.79928	4.65985	4.44359	4.00298	3.77633	4.33133	5.07445	5.11223	3.54056	3.9174	4.75955	3.6799	4.63217	4.04068	4.46129	3.34725	3.10633	3.12732	4.13787	3.39354	3.6748	3.63319	3.92823	3.77059	3.92476	4.26351	4.41037
CC2G_001586	3.37819	4.09412	3.99062	2.11792	2.99751	3.89271	4.45833	4.28775	3.55827	4.07136	4.63516	3.75531	4.28776	3.86907	4.28492	2.64248	2.34177	2.855	3.58145	3.40211	3.34323	3.08204	3.60009	3.1361	3.01676	3.21629	3.20275
CC2G_001588	0.279274	0	0.212222	0	0	0	0.723026	0.412428	2.19955	2.22864	2.16764	2.78175	1.62607	1.99972	1.97754	2.33407	1.84204	2.27537	1.62085	1.90788	2.24167	3.46669	2.98909	3.08257	3.97211	3.64739	3.5027
CC2G_001589	7.23677	7.6454	7.80307	6.01062	6.0256	6.10742	7.96315	8.0367	6.12319	7.20025	6.84629	6.83255	6.78663	6.94507	6.72829	6.60686	6.92932	6.59954	6.79909	6.49819	6.88206	6.79241	6.97301	6.95305	5.39719	5.85662	5.68818
CC2G_001590	0	0	0	0	0	0	0	0	2.40926	3.8121	3.4215	3.29503	1.67178	1.75051	1.35362	0.774105	0.968989	1.04105	1.12832	1.83386	2.05197	1.79484	1.53239	1.54655	0.591369	0.382322	0.382908
CC2G_001638	0.400949	1.70089	0.964086	0	0	0	0.573356	0	0.897165	0.511383	0.905518	1.00023	0.533215	0.853982	1.18108	0	0	0.290046	0.560142	0.644344	0.714572	1.26981	1.56071	1.6483	0.49092	0.933809	0.382908
CC2G_001639	6.22278	7.04308	7.13396	9.75304	10.3019	10.5022	6.82939	7.08061	8.8235	8.93731	8.39156	8.3706	8.16529	8.25928	8.42442	8.22206	8.28401	8.264	7.73433	7.69745	8.05951	7.43169	7.33618	7.3658	9.79374	10.0952	10.0302
CC2G_001640	1.04818	1.19301	1.18127	8.18804	7.73126	7.3686	4.55134	3.92882	5.65662	4.9472	5.18232	5.27657	5.21798	5.24683	5.2713	5.0232	4.41914	4.38364	5.0376	4.65951	4.89376	2.46673	2.71441	3.25377	4.54187	4.6654	4.85118
CC2G_001641	6.41016	6.61403	6.65134	5.10462	4.9766	5.02966	5.88435	5.5847	4.85938	5.20186	5.21237	5.05843	5.07857	4.80104	4.91141	4.51757	4.44791	4.63382	5.4178	5.10198	5.19624	4.86917	4.83728	4.93883	5.18853	4.68822	5.7218
CC2G_001642	7.35442	7.04132	7.24513	6.01062	5.48615	5.45547	7.39416	7.35738	5.77117	6.41692	6.23416	6.39384	6.39438	6.61065	6.64602	6.0131	6.04047	6.28524	6.50341	6.45769	6.4079	6.76224	6.84643	6.86992	6.10844	6.5492	6.34784
CC2G_001643	3.28643	4.26069	4.16643	6.68497	6.94925	7.36283	4.78207	5.02694	6.17002	5.1935	5.07896	4.83016	5.52864	5.15873	4.97622	4.47568	4.51288	4.37593	3.88343	3.53262	3.79475	4.76069	4.82857	4.87467	6.66136	7.10802	6.75213
CC2G_001644	4.18535	5.56397	5.50373	4.27603	3.63598	3.35552	2.43077	2.26472	2.10631	2.04254	2.05846	2.02271	1.73774	1.70018	1.44804	1.85679	2.16824	2.1543	2.22549	2.17098	1.87991	2.10199	2.07442	1.83251	5.08034	5.04274	5.25111
CC2G_001645	0.617261	0.402256	1.07676	0	0	0	1.97375	1.57799	2.10631	4.27529	3.85602	3.91332	3.3563	3.41036	3.36921	2.59109	2.75378	2.7868	3.50815	3.56348	3.80681	0.612809	0.544805	0.848389	1.0096	1.73394	1.7357
CC2G_001648	0.714357	1.77053	1.61359	0	0	1.86343	0.573356	1.10985	6.09919	5.74442	5.65666	5.24362	5.4373	5.37267	5.38108	4.54146	4.41267	4.77251	4.6753	4.52093	4.56131	4.37968	4.42843	4.24674	3.87581	4.40109	4.02677
CC2G_001649	1.8757	1.70089	2.16555	5.85279	6.01147	4.90814	7.9744	7.95054	6.73666	9.81067	9.43369	9.52206	9.35608	9.69455	9.62613	8.31457	7.99499	7.24082	7.93819	8.26256	8.62819	4.22949	4.16343	4.15464	5.33335	5.54591	5.43468
CC2G_001650	1.91709	1.83697	1.07676	0	2.26623	3.2594	1.09668	0.869721	2.36968	2.57608	2.02015	2.22918	2.1628	2.36535	1.77387	2.99856	2.75378	2.93068	2.70378	2.68764	3.2133	2.30447	1.74479	1.99584	2.15231	2.01235	1.90138
CC2G_001651	7.98924	7.91993	8.10327	7.39261	7.29095	7.84906	8.54305	8.60182	7.70327	8.47174	8.30434	8.28846	8.5891	8.57684	8.65676	8.82153	8.98017	8.79863	7.9448	7.9628	8.41149	7.29306	7.07595	7.25121	7.54573	7.45014	7.58186
CC2G_001652	4.25962	4.02456	3.93191	3.84426	4.02171	3.53043	6.32873	6.18607	2.8441	3.39245	2.65395	2.68689	3.16977	3.90839	3.44748	4.169	4.08659	3.93087	3.45453	3.16107	2.98812	4.60904	4.48864	4.51938	2.80297	2.69195	2.99842
CC2G_001653	4.72919	5.48847	5.04488	6.61294	7.32564	7.16482	7.91535	7.93892	6.48909	4.47708	4.48854	5.86309	4.81134	5.7286	5.41069	7.71084	7.5109	7.0957	7.424	7.88552	7.22548	4.69997	4.49966	4.36728	5.13961	4.90828	4.81529
CC2G_001654	7.8284	9.62037	9.38474	7.10819	8.35511	7.80718	4.41498	4.4925	6.04996	4.13096	3.56811	4.69044	3.9549	5.38666	4.02389	7.42699	7.28951	7.03023	6.34929	6.85932	6.83718	3.8369	4.18178	3.74785	2.05012	2.86216	2.98001
CC2G_001655	8.2976	9.24288	9.09564	8.58938	9.42666	8.96307	7.72772	7.26262	7.33327	5.92531	5.05073	6.6225	4.86644	6.28432	5.23203	9.46741	9.60918	9.22629	8.12324	8.75373	8.36329	5.59681	6.05397	5.60928	4.15556	5.30142	4.98182
CC2G_001656	3.22184	1.70089	1.37	7.503	7.38166	7.62151	4.08242	4.00513	5.57197	0.648208	0.818903	1.67274	0.883322	1.53772	1.50771	2.18607	2.18353	1.94079	2.16954	2.10956	2.14993	1.46682	0.850352	0.760228	0.266241	1.00824	0.773369
CC2G_001657	1.69717	2.18183	2.00394	2.11792	2.06196	2.30978	1.91274	2.26472	3.3091	2.73816	2.76236	3.20986	2.67034	2.72131	2.68157	3.74415	3.67005	3.45482	4.03203	3.99562	4.3467	2.68031	2.7761	2.76911	1.97773	2.24562	2.44842
CC2G_001658	6.91417	7.27942	7.05191	7.30389	7.24337	6.9196	7.48734	7.39616	5.89481	5.58947	5.53628	5.46397	5.77498	6.07068	5.80191	6.73224	6.53116	6.47325	5.86653	5.75287	5.86497	6.07319	6.03391	5.98849	3.84562	4.41483	3.83524
CC2G_001659	6.65148	6.10205	6.16983	4.87754	5.31258	4.90814	7.25053	7.02853	4.59342	4.91704	4.87942	4.84906	5.25599	4.92947	5.00238	5.14624	5.1659	5.22313	5.17656	5.03749	4.84194	5.21813	5.27141	5.19568	5.86178	5.85913	5.74379
CC2G_001660	1.31909	1.19301	0.708306	0	1.18283	0	0	0	0	0.278232	0.0766631	0.169976	0.200442	0.157503	0.157334	0.218937	0.252771	0.222816	0.374632	0	0.432569	0	0.156663	0.214247	0.38295	0	0
CC2G_001670	0.400949	0	0	2.11792	0	0	0.21743	0	1.52032	2.04254	1.67041	1.67274	1.19646	0.985876	1.10584	1.20852	1.51957	1.55995	1.08864	1.00068	1.26215	0.160414	0	0.214247	0	0	0
CC2G_001663	5.30957	5.62164	5.6245	3.84426	4.07705	4.18203	3.87415	3.91306	3.87329	5.31924	5.19742	5.01167	5.13473	5.1887	5.12654	4.36148	4.2874	4.29232	5.38132	5.50515	5.61004	5.29144	5.35263	5.28528	5.39024	5.46892	5.2279
CC2G_001664	4.51679	3.15032	3.10545	2.94136	2.87796	4.33133	1.71248	2.26472	3.57577	3.3429	3.38428	3.44336	3.47063	3.24467	3.26066	3.83531	3.60909	3.6337	3.47005	3.33214	3.44709	3.77007	3.74289	3.78742	4.72991	4.61865	4.32543
CC2G_001665	4.98896	4.39905	4.39007	2.94136	0	1.86343	1.30097	1.31566	5.02775	3.40216	3.9405	4.76531	4.0004	3.19101	3.65966	6.47043	6.17559	5.81883	5.54235	5.86397	5.75563	4.07195	4.30829	4.14161	2.3659	2.73643	2.80282
CC2G_001666	6.91927	6.63052	6.55006	4.14595	4.18173	4.28326	3.4492	3.61488	3.75541	3.58375	3.65193	3.68692	4.02702	3.86336	3.70497	4.68317	4.52493	4.4141	4.45896	4.80544	4.44647	4.53046	4.45885	4.53938	4.34731	4.46194	4.28851
CC2G_001667	5.18804	5.06518	4.9069	3.22523	3.30619	2.9254	1.78237	2.31356	2.52186	2.59313	2.46723	2.58534	2.90853	2.70863	2.71992	3.23455	2.98071	2.89873	3.36602	3.34995	3.1389	3.50455	3.26348	3.57773	3.29516	3.32221	3.24961
CC2G_001668	4.23529	3.8425	3.55778	4.60791	4.82322	5.45547	6.3747	6.43811	4.82321	4.98645	4.84695	4.50028	4.84913	5.04739	4.70702	3.60859	4.00721	3.95697	4.08844	4.12022	3.68137	4.89506	4.84593	4.95629	4.64481	4.93714	4.51637
CC2G_001669	2.88899	2.72847	2.26403	3.84426	4.61465	4.07317	2.38658	2.21418	4.42988	4.47248	4.78262	4.74527	4.53967	4.69581	4.41529	5.58429	5.68131	5.66745	5.49001	5.63976	5.7447	3.43566	3.7552	3.92556	1.77907	1.93813	1.44492
CC2G_001676	0	0	0	0	0	0	0	0	0	0	0.408664	0.322019	0.136673	0.230242	0	0	0.0674644	0	0	0	0.232436	0.371859	0	0	1.0096	1.21095	1.33333
CC2G_001677	0.617261	1.90048	1.88519	0	0	0	0.573356	0.412428	1.52032	0.712044	0.773565	0.858186	0.921666	0.708806	0.3652	0.947576	0.740045	0.785514	1.31182	1.35838	0.906187	3.67364	4.2957	2.9293	6.75367	6.89649	7.17869
CC2G_001678	2.75847	2.61945	2.26403	5.41814	5.7127	5.38889	5.25121	4.9518	5.28339	5.93203	5.743	5.78672	5.616	5.70805	5.78994	5.19869	5.10097	5.60612	5.72004	5.48715	5.4861	5.25414	5.25633	5.29315	4.14733	4.06856	3.91493
CC2G_001671	3.61036	3.27537	3.47796	5.93386	5.16715	5.51911	7.03125	6.92233	4.57614	4.97022	4.77688	4.524	4.74339	4.70221	4.86082	2.45398	2.57986	2.63992	3.26285	3.5404	3.37599	5.94273	6.0577	5.8297	5.51057	5.51752	5.25111
CC2G_001672	2.48338	1.62771	0.964086	0	2.44513	2.30978	5.2326	5.26903	3.88737	3.4309	3.67677	3.49227	3.6063	3.23586	3.74272	1.89966	1.93528	1.80947	2.78049	2.70159	2.92311	3.71945	3.56556	3.93566	3.79385	2.94029	3.28002
CC2G_001673	0.890903	1.38287	1.07676	0	0	1.57485	1.3932	1.49574	2.78515	1.04512	0.522667	0.907104	1.6491	1.93591	1.86796	0.408985	0.416963	0.531427	0.500916	0.858588	0.552061	0.667246	0.895531	0.804982	2.01438	1.81912	1.5485
CC2G_001674	5.64436	6.03642	5.85921	8.04025	7.57665	7.55221	9.6285	9.50196	6.24027	6.55713	5.9934	5.80296	6.05599	6.51017	6.00968	3.24289	3.9232	3.83845	4.8307	4.56735	5.27434	3.05166	3.04027	3.06428	5.91606	5.02939	6.16028
CC2G_001675	0	0	0	0	0	0	0	0	4.51397	4.45859	4.56038	4.84593	2.28549	2.84227	2.41167	0.906124	1.41985	1.35544	2.131	1.88363	2.13086	0	0	0.279131	2.2782	2.92115	2.33711
CC2G_001679	3.64772	2.89364	2.67537	4.70349	4.37075	3.89271	4.91247	4.70875	3.08307	3.99643	3.50709	3.58538	3.27718	3.61437	3.57849	4.31076	4.2696	4.2209	4.33727	4.24921	4.45799	4.95919	5.14382	4.85883	7.22553	7.25187	6.99264
CC2G_001680	5.57172	5.24108	5.263	5.10462	5.46556	6.00741	6.70894	6.47883	5.17851	4.95711	4.96257	4.69393	5.09963	4.85953	5.36705	4.84273	4.65398	5.1949	4.76299	4.63066	4.55774	4.71943	4.65223	4.62612	4.25079	4.64805	4.33994
CC2G_001681	2.2113	3.15032	2.44286	4.27603	3.90423	3.35552	5.6333	5.4492	2.87269	3.52276	3.47204	2.87076	3.47708	3.77495	3.7795	2.30247	2.40833	2.66546	2.88842	2.49297	2.91198	1.19767	1.28322	1.43707	0.685278	0.855326	1.08035
CC2G_001682	7.91202	7.81362	7.93036	7.95542	8.14135	7.51106	6.92518	6.9065	7.81706	7.45642	7.64728	7.59804	7.5615	7.58039	7.77063	8.90839	8.82206	8.59104	8.02418	8.2827	8.28405	8.49231	8.60657	8.61809	8.34371	7.63254	7.71791
CC2G_001683	8.87563	9.82986	9.97422	3.66589	2.60428	3.35552	0	0.994777	4.08359	3.76773	3.89887	3.96621	3.90314	4.03561	3.73025	4.80658	4.75463	4.94929	4.23648	4.24446	4.54699	3.03105	3.14688	3.16213	4.04477	4.45531	3.99045
CC2G_001684	2.07168	1.77053	2.63913	3.84426	2.26623	1.57485	2.47365	2.49389	7.67716	7.81911	7.91533	8.81884	7.75575	7.49855	7.13952	7.27907	7.30357	7.26765	7.5338	7.50169	7.36511	2.59863	2.64995	2.88829	2.69423	2.77957	2.84412
CC2G_001685	0	0.851145	0.708306	5.10462	5.44467	5.45547	4.32418	4.60467	5.4959	4.68224	4.8025	4.82699	5.9842	5.92353	5.70645	5.00859	5.23722	5.28829	5.88402	5.71729	5.7925	2.77011	2.83527	2.24355	2.92349	3.03234	2.84412
CC2G_001686	4.14238	3.12395	3.20797	2.11792	4.13034	3.75851	3.75754	3.70915	3.67651	3.07806	3.1995	3.12969	3.46415	3.24467	3.07587	3.04704	3.14588	3.60758	3.02081	2.98987	3.14841	2.6536	2.83527	2.90894	4.64481	4.15301	4.72421
CC2G_001692	1.04818	0	0	2.11792	2.26623	0	3.49154	3.65333	4.75573	4.71377	4.63832	4.77852	4.44411	4.66662	4.08883	4.69234	4.90743	4.93623	5.15751	4.85306	4.94924	2.74502	2.58249	3.00797	1.82105	1.44333	1.59763
CC2G_001693	0	0	0	0	0	0	0.21743	0.220902	0.655293	0.648208	0.576459	0.907104	0.533215	0.656975	0.708172	0.72727	0.698089	0.875816	0.962607	0.954852	0.60829	0.304762	0.363748	0.0750068	0	0	0.139237
CC2G_001694	2.84678	0	0	0	0	0	2.74268	2.16179	5.10208	5.48143	4.4018	4.74191	3.27718	4.28647	3.55039	3.4079	3.63712	3.77534	4.1183	4.07809	4.51057	5.8922	5.75013	5.83376	5.90146	5.55214	5.00932
CC2G_001696	0.279274	0.567895	0.964086	0	0	0	0.723026	0.869721	3.1312	2.09137	1.89871	1.97762	2.2407	2.38141	2.28096	3.1304	3.24391	3.2336	3.47775	3.23962	3.35971	2.0207	2.32616	2.4549	1.0096	1.07902	1.77894
CC2G_001697	0	0	0	0	0	0	0.406341	0	1.28531	0.888173	0.987225	0.807551	0.718863	1.10671	0.806495	1.24223	1.49528	1.32371	2.22549	2.17098	2.62906	0.719702	0.705653	0.804982	0.591369	0.265787	0.685209
CC2G_001704	3.63538	4.18619	4.24087	2.94136	1.5387	1.57485	0.406341	0.581482	2.72369	2.29268	2.45292	2.58534	2.3849	2.89915	2.38009	6.0131	5.99895	5.83299	3.66476	4.25395	3.49261	1.08221	0.981853	0.616978	0	0.265787	0
CC2G_001687	0	0	0	0	0	0	0.573356	0.581482	5.58067	5.82603	5.91988	5.84594	6.71816	6.28965	6.45081	5.48221	5.31735	6.28215	5.99818	6.03476	5.74156	5.77934	6.12801	5.94291	8.85641	8.94596	8.83494
CC2G_001688	0.513155	0	0.397192	0	0	1.86343	2.59514	2.86543	2.90073	2.95154	2.94726	2.71463	3.34928	3.20009	3.25196	2.74007	2.83346	3.21642	3.50061	3.10972	3.17658	3.20673	3.65367	3.61591	1.69126	1.59594	1.82092
CC2G_001689	0.400949	0.851145	0.561119	0	1.82392	0	1.20244	0.869721	4.59342	5.1879	5.31878	5.29277	4.96612	4.97251	5.07815	4.0408	4.26602	4.17717	4.16197	4.05655	4.30052	3.87787	4.05809	3.78742	3.32464	3.55108	3.56578
CC2G_001690	1.64885	3.06973	3.13177	0	0	0	1.30097	0.869721	0.897165	0.437774	0.628317	0.322019	0.3201	0.807195	0.428327	0.218937	0.0674644	0	0.560142	0.523974	0.368893	0.371859	0.755516	0.804982	0.38295	0.772326	0.382908
CC2G_001691	7.11868	7.81053	7.66119	5.93386	5.93864	5.69475	4.98836	4.96715	5.37118	5.24296	5.40492	5.47212	5.73786	5.51957	5.76265	5.67809	5.42415	5.26759	5.18364	5.40007	5.24361	5.71781	5.7639	5.65736	5.05857	5.24482	4.88125
CC2G_001709	0	0.215102	0	2.11792	2.99751	1.57485	0.573356	0.732788	1.89954	2.11517	1.85585	1.20971	1.09944	1.06755	0.942453	0.628776	0.309604	0.638488	1.04784	1.52445	1.36365	0	0.156663	0.146306	0	0	0
CC2G_001710	0.890903	0	0	0	1.18283	0	0	0.732788	1.84286	2.82734	2.49543	1.97762	0.883322	1.10671	0.806495	0.523062	0.610329	0.785514	1.00585	1.35838	1.07531	2.91212	2.80006	2.94937	0.685278	0.855326	0
CC2G_001706	7.20788	7.27494	7.25863	5.97275	6.18522	5.94698	6.63295	6.6526	6.36124	6.14358	6.45036	6.39813	6.42474	6.36629	6.34129	6.62214	6.58107	6.38759	6.1708	6.11377	6.21881	6.42677	6.32044	6.58804	5.66837	5.76029	5.57314
CC2G_001707	4.8833	5.17198	5.22683	3.66589	4.13034	3.15643	2.67079	3.26364	3.1312	3.21655	3.36148	3.72152	3.3563	3.38668	3.38521	4.08326	3.85324	3.51928	3.60273	3.78916	3.36787	3.41194	3.48656	3.61591	3.28019	3.57577	3.52826
CC2G_001708	5.35545	5.69063	5.93217	4.87754	3.90423	4.46662	3.55282	3.76289	3.99533	4.10741	4.44943	4.2812	4.34178	4.35313	4.44612	4.53807	4.65124	4.30862	4.44724	4.45662	4.46181	4.34671	4.37361	4.2946	10.7308	10.3157	10.9616
CC2G_001712	1.37955	0.71646	0.841857	0	0	0	2.24525	1.65581	0.517227	0	0.218754	0.322019	0.200442	0.157503	0	0.149585	0	0	0.374632	0.39264	0.302278	3.64001	3.36334	3.11848	4.69082	4.59469	5.15182
CC2G_001713	0	0.402256	0	0	0	0	1.20244	0	0	0.278232	0.284874	0.169976	0.376402	0.428747	0.157334	0	0	0.1523	0	0.248141	0.232436	1.19767	0.705653	0.71404	1.73583	1.54684	1.86171
CC2G_001711	8.20717	8.44883	8.49033	6.84025	7.21898	7.05459	6.88206	6.91641	6.67914	7.12823	7.17908	7.3105	7.36201	7.49441	7.37955	8.07756	7.89842	7.8404	7.84861	8.00943	7.87128	5.7716	5.80591	5.86712	4.4777	4.32304	5.23568
CC2G_001715	1.64885	1.70089	1.82193	4.14595	3.21045	4.28326	2.19488	2.05095	3.00773	3.10208	2.37916	2.53954	2.8796	2.39729	2.50248	1.64634	1.76285	2.38706	1.56411	1.52445	1.29679	1.37167	1.47402	1.67265	0.38295	1.00824	0
CC2G_001714	4.4408	2.50152	3.05131	6.51093	6.89639	5.96233	7.21147	7.17778	8.06485	8.08553	8.69093	8.75805	8.26885	8.57138	8.85197	7.5798	7.70842	8.17566	7.64269	7.75331	7.7124	7.65226	7.92907	7.81808	7.89065	8.14721	8.07742
CC2G_001718	0	0.71646	0	0	1.18283	0.730907	1.63904	0.994777	0.897165	1.73976	1.76611	1.78168	2.71469	2.66993	2.95245	1.59509	1.41985	1.66499	2.02987	1.97829	1.48874	2.57035	3.06025	2.97897	0.856533	0.265787	0.773369
CC2G_001719	5.00824	2.18183	2.31086	7.72426	7.9619	8.59587	9.59035	9.38294	6.60865	7.61875	7.57603	7.525	7.14875	7.39607	6.98078	2.2203	1.98847	1.98203	4.6311	4.2301	4.49201	5.57028	5.79105	5.30877	4.40366	4.301	3.79368
CC2G_001726	0	0	0	0	0	0	0	0.581482	4.17826	5.77837	5.78501	5.88309	3.52768	3.47165	3.30338	1.96167	1.86118	2.13614	4.21821	3.87163	3.52948	1.12173	0.705653	1.25551	0.591369	0.684258	0.266211
CC2G_001729	3.13682	1.96131	2.16555	0	0	1.21373	1.71248	1.10985	3.10734	3.4309	3.58789	3.71467	2.22545	1.75051	1.62013	2.43953	2.54479	2.90946	3.05209	3.268	2.83159	2.33841	2.2758	2.12501	2.90409	3.15208	2.73856
CC2G_001730	0	0	0	0	0	0	0	0	2.72369	3.56658	3.102	3.83331	2.21004	2.10017	1.25259	0.947576	1.19697	1.11707	2.52209	2.0885	2.4093	0.160414	0.297968	0	4.04477	4.39416	3.60235
CC2G_001724	7.99226	7.99459	8.06195	8.36657	8.25369	7.69683	9.8159	9.93304	7.3726	8.82676	8.47735	8.35636	8.5156	9.06224	8.46427	8.26009	8.62378	8.23817	8.46698	8.18498	8.41593	9.3108	9.30299	9.37728	8.05249	8.43255	7.92336
CC2G_001733	1.37955	0.851145	0.841857	2.58761	0	0	0.723026	1.40851	7.37759	7.68288	7.35483	8.36896	8.28434	8.25683	8.00643	5.97852	6.06234	6.89641	7.35773	7.3578	7.64973	2.404	2.16945	2.35309	3.42333	2.82146	3.30981
CC2G_001734	0	0	0	0	0	0	0	0	1.10425	1.61173	1.59422	1.12953	1.13251	1.02729	0.898542	0.628776	0.364282	0.585951	1.20454	1.49273	1.42755	2.26971	2.03459	1.85397	1.27423	1.54684	1.49764
CC2G_001731	0	0	0	0	0	0	0	0	7.67615	9.96264	9.8242	9.77143	6.79698	7.10049	5.06083	6.62773	7.4367	6.50896	7.61634	7.53322	6.10861	1.43579	1.17745	1.6966	5.69402	4.95607	5.16817
CC2G_001732	7.01648	6.30344	6.4119	5.72193	6.18522	6.43894	6.7422	6.74229	6.32548	6.77734	7.02014	6.93045	6.65981	6.68855	6.68209	6.60119	6.45685	6.45871	6.32708	6.35889	6.272	6.55049	6.62121	6.63682	8.08246	8.4556	8.01944
CC2G_001735	6.76491	3.95147	3.94681	7.1427	7.23122	7.73307	8.95365	8.92226	7.2417	8.59828	8.53622	8.59385	8.94912	8.99778	9.04339	4.71952	4.66763	4.98015	7.39684	7.53175	7.74725	8.88378	8.59592	8.63717	9.97781	9.91925	9.76259
CC2G_001739	1.69717	1.70089	2.16555	2.94136	2.60428	3.04553	1.20244	1.21642	2.36968	1.50765	2.00061	1.83322	1.28737	1.84618	1.14395	1.87839	1.63526	1.78637	2.34818	1.83386	1.51839	1.30457	1.53239	1.12039	1.59775	1.07902	1.21238
CC2G_001740	4.09808	4.3769	4.50529	3.46232	3.77633	4.59029	4.7211	4.97476	3.44859	3.25991	3.38428	3.07722	3.29919	3.23586	3.24321	2.23711	2.71223	3.07109	3.8182	3.55583	3.28405	3.83095	3.93906	3.91539	3.82513	3.20051	4.03571
CC2G_001741	3.17143	3.01339	3.15762	3.46232	5.40197	4.33133	2.90812	2.40654	6.13208	7.01654	6.82631	6.74697	5.69006	5.88744	5.80042	6.47132	6.55413	6.54725	6.77117	6.77613	6.70885	5.44345	5.62158	5.67706	3.92476	4.26351	3.85558
CC2G_001742	6.95696	7.87815	7.94249	4.27603	3.90423	4.07317	1.30097	0	3.28803	3.2055	3.54131	3.54731	2.99198	3.30485	3.08569	4.7344	4.33266	4.35645	4.31595	4.24921	3.77031	0.497359	0.803713	0.760228	0.49092	0	0.591308
CC2G_001743	1.37955	4.88065	4.67599	0	0	0	3.77479	3.04969	1.6581	2.69142	2.09578	1.85831	1.50502	1.21821	1.0667	0.348376	0.0674644	0.1523	1.24119	0.459801	0.493552	0.234393	0	0.214247	0	0.139006	0.266211
CC2G_001744	1.54708	1.46918	1.61359	3.22523	2.7476	3.68642	3.57268	3.79764	5.16123	5.03717	4.87406	5.47415	5.6478	6.16299	5.727	6.18975	5.94504	6.01787	6.57784	7.04095	6.91239	4.74496	5.16242	5.04292	6.8782	6.69576	6.775
CC2G_001737	2.75847	2.79682	2.26403	2.11792	3.63598	2.79434	1.47988	1.40851	2.40926	0.773174	1.20778	1.97762	1.4272	1.84618	1.41725	4.19505	4.0537	3.82151	2.6088	2.83405	2.99868	0.719702	1.28322	0.760228	1.0096	0.855326	0.773369
CC2G_001738	9.02061	8.61424	8.68176	9.30467	10.7669	10.0999	6.74658	6.78621	9.30475	7.19048	7.03402	9.33947	7.01771	8.92945	7.94266	11.2711	11.3111	10.8986	10.0301	10.3612	10.7254	6.44539	7.64644	6.74629	7.33462	7.17215	8.0556
CC2G_001746	0	0.402256	0	0	1.82392	1.21373	0.723026	0.581482	1.84286	1.7088	1.83393	1.83322	1.03094	1.41827	0.898542	0.576887	0.933267	0.831372	1.44347	1.49273	1.90258	1.33851	1.21358	1.18953	0.49092	0.684258	0.591308
CC2G_015286	0.279274	0.402256	0.397192	3.46232	3.1079	1.21373	1.97375	1.10985	1.19762	0.437774	1.13794	0.858186	0.843931	1.21821	0.942453	2.99856	3.09828	2.92011	2.75537	2.34094	2.66927	1.08221	0.981853	0.760228	0.266241	1.14649	0.490867
CC2G_001745	0.890903	3.92117	3.25662	6.56284	7.52784	7.64547	3.16516	2.9605	8.15854	8.52936	8.12163	8.61309	7.43383	7.62069	7.19163	9.62123	9.45535	9.14988	6.96304	6.85075	6.84744	2.23408	2.3907	1.91649	5.23586	4.47513	4.5604
CC2G_001748	6.8595	6.90667	6.83677	5.30077	5.03366	5.14174	5.25736	5.38781	3.94236	3.29159	3.514	3.21958	3.41123	3.24467	3.25196	3.71444	3.89097	3.79283	3.13233	3.12014	2.80778	3.41194	3.36334	3.48451	3.89559	4.31573	3.92459
CC2G_001749	7.35724	7.1168	7.11594	5.23831	4.82322	5.477	5.5506	5.4492	4.37097	4.02184	4.23621	4.1603	4.34531	4.22994	4.03914	3.61504	3.90025	3.84964	4.00564	3.6233	3.40802	3.72587	4.17263	3.93062	4.66223	4.84875	4.82564
CC2G_001750	4.59538	5.7862	5.6245	4.27603	3.63598	4.23354	3.11187	2.72807	3.15467	2.88386	2.70314	2.83328	2.7995	2.91026	2.82922	1.9413	1.74235	1.87662	1.98735	2.0885	2.11154	2.08209	1.31683	1.08453	2.2782	2.18273	2.04998
CC2G_001753	3.559	2.07578	2.11366	8.07641	8.24466	8.13968	7.12333	7.35446	8.10004	8.88158	8.92826	8.86251	8.38017	8.47785	8.47482	7.80652	7.85583	8.15439	8.09128	8.31395	8.32211	8.03779	8.10916	8.17634	8.36736	8.25048	8.03402
CC2G_001768	0	0	0	0	1.18283	0	0.982555	0	1.84286	2.20665	2.34857	1.88298	1.97501	2.21216	1.89055	2.5378	2.71223	3.58098	2.27936	2.13033	2.73388	2.10199	2.18773	2.10725	1.44504	1.97572	1.44492
CC2G_001769	0	0	0	0	0	0	1.47988	1.40851	1.78387	2.52368	1.96071	2.04474	2.13043	1.99972	2.24634	0.98787	0.564363	1.11707	1.34588	1.17068	1.22667	3.22499	3.30593	3.17071	2.96152	3.4072	2.30789
CC2G_001770	3.40753	2.54191	2.87555	3.84426	5.33545	5.02966	2.93905	2.65416	5.43009	4.88625	5.01709	4.97772	4.42756	4.14313	3.96657	5.32004	5.23722	5.42168	4.77866	4.75953	4.85362	1.43579	1.41318	1.46523	0.773445	0.933809	0.773369
CC2G_001771	3.59769	4.26069	4.47477	3.84426	4.23136	3.82717	3.59226	3.65333	3.90132	3.44974	3.0459	3.11935	3.13755	3.37871	2.91987	3.45178	3.26562	3.6337	2.74265	2.88381	2.44061	2.78249	2.86964	2.89865	1.64526	1.27265	1.86171
CC2G_001772	6.16597	6.60453	6.61214	5.23831	4.27933	4.77543	4.73878	4.13309	4.44899	4.8897	4.742	4.84279	4.97754	5.07481	5.02042	5.25755	5.15237	5.24235	5.3502	5.27744	5.11851	4.78244	5.01412	4.68117	4.60931	4.74374	4.62699
CC2G_001765	0.617261	0.215102	0.561119	2.11792	1.82392	3.15643	1.78237	1.72965	2.40926	2.3134	2.56361	2.57024	2.21004	2.56134	2.3478	1.59509	1.44543	1.55995	1.00585	1.39316	1.29679	0.819218	1.21358	1.01003	0.685278	0.855326	0.685209
CC2G_001766	3.13682	2.54191	2.05985	6.53712	6.22251	7.17144	5.76859	6.09472	6.03739	7.19538	7.09462	7.0428	6.81046	7.08464	7.23476	5.22632	5.53853	5.42168	5.80818	5.74616	5.86208	5.48949	5.64657	5.79129	4.13906	4.86387	3.99045
CC2G_001773	7.84659	6.90474	6.93346	6.77573	7.38714	7.47407	6.16832	6.10863	6.98767	6.4217	6.30458	6.17787	6.24362	6.52831	6.70537	6.26751	6.36347	6.3799	5.86946	5.9886	6.24676	7.34042	7.57012	7.49006	8.01681	6.90016	7.24379
CC2G_001774	0.890903	1.70089	1.07676	0	0.709386	0	0.723026	0.869721	1.19762	0.831819	1.06455	1.58527	1.19646	1.3217	1.0667	0.628776	0.820465	0.960797	2.07118	1.75584	1.19029	2.66702	2.42192	2.38292	2.86449	2.01235	3.0871
CC2G_001775	4.49646	4.45301	4.00493	4.14595	3.77633	3.82717	3.70452	4.07761	4.85222	5.89125	6.17109	6.01028	5.58647	5.25339	5.52702	4.27457	4.49154	4.5264	6.30345	6.31762	6.04891	6.76303	7.15703	7.07855	6.75637	6.6887	7.1242
CC2G_005003	0.400949	2.32759	2.48431	5.17301	6.50065	5.02966	0.982555	0.581482	8.99099	5.89641	5.22926	5.46397	6.53164	6.89771	5.9678	8.70191	8.64118	8.7504	6.80446	7.1274	7.55232	3.10193	2.03459	2.68781	2.24775	2.15022	2.18469
CC2G_005000	8.10735	7.65118	7.73172	8.86735	9.52818	9.67307	7.80215	7.80656	9.49752	9.01054	9.10995	9.02611	9.39918	9.37479	9.25584	10.6324	10.5375	10.4407	9.53937	10.0895	9.87213	8.7184	8.90451	8.97399	9.49727	9.52322	9.72335
CC2G_005001	4.74076	4.39905	4.50529	5.6276	5.95351	6.48216	4.04025	4.27548	6.14679	4.77856	5.08593	5.16535	5.25223	5.36461	5.10497	6.97081	6.84592	6.77332	5.45143	5.96712	5.91599	4.87207	4.92976	5.05455	5.72751	5.64255	5.81043
CC2G_005004	0	0	0.708306	9.21018	11.2484	10.5204	0	0	9.07759	10.7917	10.099	10.168	10.6135	11.3151	10.6616	10.991	11.2954	10.628	9.98667	10.1976	10.0577	2.83098	3.14688	2.82451	3.59043	3.42089	3.6497
CC2G_005007	0.890903	0.974322	0.561119	0	0	0	0	0	4.7247	3.96402	3.92503	4.26722	2.86983	3.89167	3.63311	5.76181	5.99463	5.77696	4.3541	4.50909	4.1189	3.30442	3.14688	2.74635	5.94482	5.22934	5.68534
CC2G_005008	0.513155	0.974322	0	0	0	0	0	0	0	0.437774	0.348097	0.523701	0	0.54737	0.3652	1.87839	2.02286	1.7629	0.617031	0.523974	0.493552	0.819218	0.297968	0.400752	1.21248	0.772326	0.935008
CC2G_005011	0.805329	0.402256	0	3.66589	2.99751	3.82717	3.80867	3.28828	2.52186	1.8853	1.78907	1.35783	1.47954	1.99972	1.21728	0.819467	0.933267	0.918933	1.77879	1.58587	1.26215	1.26981	1.41318	1.40836	1.0096	1.00824	1.08035
CC2G_005009	5.47458	4.63206	4.84461	3.46232	4.13034	2.9254	5.19466	5.39917	3.70859	3.85514	4.22783	4.2719	4.57317	4.11459	4.70064	3.99705	3.89562	4.32474	4.52734	4.23969	4.28335	4.76069	4.84593	4.77976	4.41741	4.56418	4.50997
CC2G_005010	0.146384	0	0	2.11792	0	1.21373	0.723026	0.732788	1.00442	0.437774	0.284874	0.392426	0.261511	0.29949	0.428327	0.467151	0.252771	0.474761	0.374632	0.644344	0.60829	2.10199	2.49712	2.51	0	1.14649	0.856451
CC2G_005012	0.890903	2.07578	1.45585	3.22523	2.7476	2.79434	2.34099	2.26472	3.6602	3.17185	3.0554	3.11935	3.12938	2.74633	2.94167	1.39986	1.47057	2.61391	2.49199	2.55571	2.44061	3.43566	2.92516	3.14483	2.01438	1.93813	1.49764
CC2G_005014	0.279274	0	0.964086	3.84426	4.7227	4.12863	2.1427	1.65581	3.77068	2.39346	2.46723	1.75521	2.17872	1.89174	2.07939	4.47214	3.9812	4.42536	3.7499	3.74945	3.64823	0.556239	0.363748	0.400752	0	0.490143	0.591308
CC2G_005015	0	0	0	0	0	0	0.406341	0.732788	0.897165	0	0	0	0.200442	0.230242	0.230002	0.285108	0.252771	0	0.161699	0.248141	0.552061	0.497359	0.981853	0.565884	0.266241	0.382322	0.266211
CC2G_005020	3.50574	4.09412	4.20413	3.46232	2.26623	3.53043	2.03229	2.05095	3.03328	3.18315	3.23338	3.11935	3.19347	3.07731	3.33667	3.62785	3.46642	3.84964	3.28934	3.98426	3.97128	3.37971	3.30593	3.24568	4.12237	4.75999	5.06278
CC2G_005021	4.18535	3.8425	4.03313	2.94136	4.53784	3.75851	3.05653	2.79839	4.34059	3.99001	4.37549	4.52007	4.1492	4.10011	4.24164	5.18359	4.80492	4.89093	5.23906	5.23014	5.04911	4.19748	3.76132	3.98997	4.45122	4.52034	4.57887
CC2G_005026	1.64885	1.83697	1.82193	2.11792	0	0	1.30097	1.40851	0.655293	0.712044	0.678375	0.807551	0.843931	0.708806	0.708172	1.06523	0.859054	0.638488	0.872021	0.585414	1.11467	1.23419	1.47402	1.18953	2.08499	1.77716	2.08485
CC2G_005027	0	0.402256	0	0	1.18283	0	2.24525	2.05095	0	1.50765	1.87744	1.49215	1.53006	1.25354	0.806495	1.76702	1.13543	2.35602	3.24491	2.249	3.65492	0.999758	0.486941	0.400752	0.38295	0.265787	0
CC2G_005022	0	0	0	0	0	0	0	0	3.41009	3.24919	3.49317	3.18032	2.68156	2.28226	2.36403	1.83487	1.70046	1.22409	3.11269	2.79557	2.72119	3.14093	3.04027	2.86734	2.76046	2.86216	3.28002
CC2G_005023	6.76208	6.98017	6.94278	4.87754	5.26571	5.53972	5.70703	5.65271	4.84502	4.45859	4.58683	4.48828	4.78818	4.54357	4.72913	5.48924	5.37174	5.31274	5.59286	5.55399	5.26999	5.07949	5.00384	5.06838	6.11478	5.85662	6.27232
CC2G_005165	1.91709	2.41717	2.00394	0	0	0	0.573356	0.412428	0.655293	0.773174	0.408664	0.644021	0.674642	0.807195	0.230002	0.0767305	0.252771	0.1523	0.824501	0.644344	0.714572	0.819218	0.850352	0.760228	0.773445	0.490143	0.490867
CC2G_005166	0.617261	1.19301	1.94579	0	0	1.57485	0.406341	0	2.28712	1.67716	1.45756	1.42655	1.91925	1.70018	1.69905	1.56877	1.65732	1.47583	1.00585	1.08818	1.29679	1.77018	1.5035	1.25551	0.591369	0.382322	0.856451
CC2G_005167	2.33859	3.20165	3.28035	2.58761	0	1.21373	1.30097	1.93087	3.91513	2.92485	3.0267	3.45985	3.14567	3.50134	3.30338	3.04704	3.422	3.5052	2.39773	2.39341	2.85502	3.03105	3.06025	3.26982	1.97773	1.81912	2.18469
CC2G_005170	0	0.71646	0.212222	0	0	0	0.406341	0	1.36797	0.942409	1.13794	1.42655	1.13251	1.21821	1.56502	1.13865	1.22679	1.44666	1.75363	1.61562	1.92489	1.30457	1.44392	1.40836	0.685278	0.684258	0.591308
CC2G_005171	0	0.974322	0	0	0	0	0.982555	0	2.15368	1.99201	2.09578	1.80768	2.14671	2.39729	2.21088	1.96167	2.25761	2.25868	2.6088	2.44405	2.94511	2.17895	1.86324	2.27571	1.27423	1.21095	1.33333
CC2G_005168	6.24935	5.75218	5.66562	5.30077	5.7127	6.07955	6.28426	6.54167	6.28617	6.51302	6.89076	6.78099	6.78858	6.58401	6.94007	5.88694	5.92244	6.14474	6.63835	6.41602	6.29145	7.21812	7.30146	7.42837	7.55431	7.57783	7.68491
CC2G_005169	3.10135	3.49701	3.30369	3.66589	3.56033	4.42291	2.5153	2.40654	5.31499	5.99913	5.87898	5.39061	4.86398	5.06986	4.59111	4.7344	4.44791	4.43653	5.02189	5.01254	4.92454	4.3756	4.40519	4.41136	6.55809	6.20208	6.91361
CC2G_005172	1.54708	2.65671	2.71072	0	0	0	0.573356	0	3.1312	2.37386	1.69493	2.26715	1.73774	1.50877	1.56502	0.863446	1.22679	1.15363	2.16954	1.90788	2.13086	1.91218	1.6425	1.25551	2.11905	2.69195	2.50101
CC2G_005173	5.61951	6.41638	6.29448	3.84426	3.77633	3.89271	3.80867	3.92882	4.34059	5.46299	5.37488	5.44339	5.42234	5.34836	5.45115	5.18575	4.90973	4.91775	5.61048	5.36764	5.40707	5.2385	5.37673	5.33381	5.05418	5.02492	5.02287
CC2G_005174	1.74391	0.851145	0.708306	0	0	0	2.77732	2.10743	3.26664	3.07806	3.22499	3.62247	2.99198	2.80703	3.55747	3.73234	3.78473	3.76356	3.06237	3.22038	2.99868	2.69349	2.80006	2.2272	1.94012	1.33181	1.86171
CC2G_005175	0.279274	0.567895	0	1.41702	0	0	0.858618	1.21642	4.6105	4.71766	4.30952	5.13743	3.15375	3.31324	2.78166	3.81306	4.00721	3.86074	4.06307	4.18119	4.57195	0.371859	0.600438	0.565884	0.591369	0.265787	0.856451
CC2G_005182	4.50327	4.03874	4.04703	0	1.18283	1.21373	1.71248	1.40851	5.77874	2.0175	1.89871	2.98908	2.56527	2.83062	2.95245	4.54821	4.31889	4.11827	4.89249	5.07546	5.79856	6.12881	6.14331	6.34262	4.62717	4.73281	5.16817
CC2G_005183	1.74391	2.79682	2.74523	0	0	0	0	0.869721	1.6581	0	0.149457	0.459556	0.376402	0.489277	0.602655	1.13865	1.56697	1.11707	1.59276	1.35838	1.29679	2.69349	2.37483	2.66371	1.27423	1.89954	2.01424
CC2G_005184	1.37955	0	0.397192	2.11792	0	0	5.22635	5.29965	0	0.278232	0.218754	0.169976	0.629023	0.428747	0.428327	0	0	0	0	0	0	0	0	0	0	0	0
CC2G_005185	1.78919	1.55062	1.07676	2.94136	1.82392	0	1.47988	2.40654	7.42301	4.23783	3.82302	4.76531	4.89563	5.55363	4.84065	5.40434	5.51002	5.06417	8.14938	8.18746	8.51393	3.96193	4.02289	4.10629	5.88918	5.76298	5.74924
CC2G_005186	3.74286	2.79682	3.6698	0	3.39597	2.9254	3.90581	3.76289	4.42023	3.93756	4.37928	4.13486	4.31682	3.94126	3.95053	4.31076	4.34631	4.68154	4.73435	4.72922	4.83017	4.89506	4.95132	5.03354	3.86581	3.90286	4.23517
CC2G_005176	2.78106	1.83697	0.841857	2.11792	2.06196	2.79434	4.54129	4.63381	5.07157	4.95051	4.9371	4.85531	4.34178	4.25195	4.82021	4.44345	4.64297	4.24227	3.16131	3.00118	3.33492	3.25195	3.22859	3.02698	2.71665	2.80066	2.55176
CC2G_005177	7.23268	6.24041	6.35996	5.97275	5.64106	5.81796	6.45714	6.54423	6.71116	6.72705	6.84081	6.827	6.81683	6.89071	6.85862	6.83176	6.91623	6.88286	7.25394	7.15553	7.11519	6.49796	6.41656	6.61342	7.12124	6.81071	7.56498
CC2G_005178	5.40356	3.89022	3.32666	6.15288	5.76418	5.34273	7.80425	7.5758	5.7091	6.31397	6.22892	6.22325	6.52465	6.43426	6.36266	5.72205	5.73546	5.71103	6.01812	5.89615	5.85193	6.32463	6.31526	6.28849	8.87427	8.7869	8.88526
CC2G_005179	8.56866	8.527	8.37248	8.10295	7.76955	8.02012	9.93384	9.92741	7.44697	8.5076	8.06425	7.98487	7.89927	8.30209	8.29333	6.40962	6.8543	6.88218	7.76769	7.58302	7.60638	7.08198	7.26856	6.93932	7.04579	7.03868	7.36757
CC2G_005180	4.87282	5.31286	4.77951	3.84426	4.37075	3.15643	4.91247	4.57493	2.95522	3.14896	3.08354	2.82057	3.37715	3.21809	3.35303	2.05945	2.40833	2.20743	3.05209	2.76934	2.87808	3.07198	3.0503	2.9887	3.40964	2.94029	3.59026
CC2G_005181	8.92654	10.3546	10.458	3.66589	1.82392	2.49	0	0.869721	1.52032	0.511383	0.726755	0.459556	0.718863	0.230242	0.656378	0.628776	0.364282	0.785514	0.872021	0.954852	0.66241	3.86628	3.71166	3.93566	2.52676	2.57438	2.36575
CC2G_005190	0.400949	0.71646	1.37	2.58761	1.18283	0	1.20244	0.581482	0	0.581417	0.94695	0.755073	0.629023	0.708806	0.0808106	0.576887	0.416963	0.415779	0.824501	0.700961	0.60829	0.556239	0.803713	0.666326	0.773445	0.490143	1.08035
CC2G_005188	6.21864	6.93349	6.75022	5.6276	6.56979	6.87975	4.05445	4.17333	7.32812	6.2762	6.07275	6.34696	6.49078	7.00461	6.56582	8.22417	8.19678	7.93467	7.56891	7.56645	7.5986	6.16827	6.75822	6.4345	6.08063	6.4137	6.40416
CC2G_005192	6.04051	5.1784	5.15806	6.40117	6.21018	5.45547	6.96517	6.9669	6.26475	6.04942	6.20777	6.24481	6.35902	6.48438	6.4911	7.07794	6.94454	6.74065	6.26392	6.36109	6.33479	6.59943	6.71713	6.73694	7.3704	7.5098	7.4163
CC2G_005193	3.63538	3.72462	3.55778	5.72193	6.29431	6.54466	3.38326	3.33634	5.4959	5.34464	6.11879	6.12844	7.68541	7.77035	7.66893	8.82483	8.49933	8.67105	7.422	7.72757	7.33991	4.25637	4.2616	4.35228	4.72991	5.04716	4.63877
CC2G_005194	6.10461	9.28439	9.29187	3.22523	0	2.30978	2.29391	1.49574	2.75475	2.81285	2.9267	2.80775	3.34223	3.04742	3.05602	3.14829	2.96311	3.25058	3.65121	3.53262	3.42378	4.04137	3.97634	4.15895	2.64833	2.94029	2.67131
CC2G_005195	4.91429	5.4624	5.50373	5.76688	5.89312	5.76644	7.39416	7.20068	5.43967	5.72522	5.61389	5.40346	5.76051	5.79605	5.88161	5.38937	5.3784	5.34472	5.75689	5.54629	5.57696	6.53594	6.56552	6.48265	5.94007	5.67147	5.62145
CC2G_005196	7.40983	8.88345	8.82071	5.72193	6.18522	5.86771	8.71485	8.23829	5.38614	5.67804	5.5863	5.40984	5.88823	6.06572	5.82262	5.38937	5.49018	5.42168	5.53499	5.40433	5.4861	5.58802	5.70166	5.68755	5.3727	5.2828	5.44813
CC2G_005051	0	0.71646	0	0	3.1079	3.68642	2.70718	1.93087	3.88737	3.48671	3.514	2.95459	3.30646	3.12578	3.33667	2.70424	2.75378	3.30034	3.18972	3.07801	2.88947	1.43579	0.850352	1.51995	0	0	0.382908
CC2G_005063	0	0.71646	0.561119	0	0	0	0	0	0.364536	0.360207	0	0.169976	0.261511	0.0808996	0.230002	0	0.309604	0.0781586	0.374632	0.322199	0.368893	0.719702	0.600438	0.931472	1.54862	1.33181	1.14787
CC2G_005117	0	0	0	2.11792	0	0.730907	0.406341	0	5.18991	0.888173	0.678375	0.523701	0.718863	0.29949	0.546854	0.863446	0.820465	0.875816	0.775363	1.00068	1.63125	1.19767	1.10236	1.2229	1.64526	1.21095	1.5485
CC2G_005028	5.66273	4.88065	5.13222	5.6276	5.35797	6.07955	4.0685	4.65291	5.32537	5.10116	5.98721	5.77524	6.24551	5.93989	5.65624	5.21151	5.15431	4.93885	6.44961	6.48011	6.13636	5.06182	5.23232	5.25938	6.63218	6.50811	6.81839
CC2G_005029	1.18999	1.19301	0.964086	2.11792	1.18283	1.21373	0.723026	0.581482	0.897165	0.994679	1.71905	1.24819	1.67178	1.47923	1.02646	1.10241	1.00385	1.18929	1.82781	1.88363	1.48874	0.999758	1.17745	1.08453	1.54862	1.54684	1.77894
CC2G_005030	6.05912	5.49877	5.63834	6.86113	7.34267	7.33363	3.74008	4.11942	5.89132	5.0152	5.89627	5.65866	5.94052	6.09888	5.19621	5.41361	5.21135	5.17947	5.77263	5.71729	5.4748	5.00218	5.1226	4.96124	5.13129	5.00688	5.0715
CC2G_005032	0	0.402256	0	0	0	0	0.406341	0	0.781292	0.773174	1.06455	0.807551	2.86983	3.18187	1.97754	0.285108	0	0.354281	4.1183	4.52877	4.05964	3.28714	3.55152	3.1361	3.55355	3.61202	3.54088
CC2G_005033	0.513155	0.974322	1.07676	0	0	0.730907	0	0	0.517227	0.278232	0.628317	0.858186	0.959017	0.985876	0.3652	1.20852	0.780815	1.04105	0.872021	1.00068	1.15298	0.304762	0.544805	0.512912	0.266241	0.265787	0.382908
CC2G_005034	2.51067	3.15032	3.20797	2.11792	2.06196	0	0.573356	0.412428	4.35079	4.19937	4.39434	4.24361	3.23973	3.87475	2.7937	5.40805	4.84151	4.59114	4.56758	4.40643	4.26598	2.41994	1.86324	2.21067	2.64833	1.97572	2.57647
CC2G_005035	1.54708	1.55062	1.18127	4.39534	6.39573	5.05851	1.91274	1.99216	4.91542	5.89984	5.51233	6.3569	5.88581	7.29478	6.64436	9.08884	8.94809	8.06784	7.67529	8.28646	8.23746	1.55607	0.981853	1.25551	1.27423	1.64342	1.5485
CC2G_005036	2.73552	2.37308	2.60195	5.36065	5.31258	5.31908	6.05993	6.03044	6.43499	7.0647	6.99444	6.91259	6.6049	6.7385	6.67071	6.674	6.73877	6.78793	6.70136	6.74197	6.76172	3.65356	3.76132	3.26982	5.49768	5.3198	5.52633
CC2G_005037	6.1724	7.39556	7.32715	5.97275	5.2417	5.38889	5.28771	5.26903	5.52771	4.96696	5.16047	5.31106	5.50358	5.4958	5.13603	6.32467	6.22906	6.12301	6.11511	6.23015	6.33584	5.82196	5.9733	5.86051	5.85927	5.75219	6.09976
CC2G_005038	4.72337	4.89631	4.81242	7.52933	7.55245	7.83245	9.0391	8.80707	6.61712	7.03459	6.92161	6.76781	6.91632	7.18183	6.94548	4.49678	4.58083	4.39514	6.51468	6.40967	6.35136	7.14027	7.14481	6.94433	7.56284	7.54383	7.50508
CC2G_005039	3.51924	3.63411	3.88626	3.84426	3.48049	3.68642	3.77479	4.03456	3.95579	4.39681	4.14124	4.1603	3.83947	4.15252	3.92886	3.39298	3.45387	3.80437	4.22737	4.22045	3.74545	3.33837	3.95515	3.92048	4.46452	4.24053	4.01778
CC2G_005040	0.617261	0.71646	1.27872	0	0	0	1.3932	1.10985	2.00663	4.05299	4.15898	4.34473	3.47063	3.78101	3.89574	1.54195	1.28463	1.63944	2.84145	2.79557	2.95598	0.956697	0.803713	1.49285	3.20291	2.41934	3.51554
CC2G_005041	1.54708	0.71646	0	0	0	0	0.406341	0.412428	0.655293	0.511383	0.905518	0.585115	0.376402	0.603213	0.758171	0.408985	0.610329	0.415779	0.439156	0.170075	0.232436	1.26981	1.17745	1.08453	2.08499	1.07902	1.64513
CC2G_005042	2.98941	2.54191	2.35621	0	2.44513	2.65018	0.858618	0.732788	2.15368	1.99201	1.94034	2.24829	1.80082	1.95749	2.01915	1.45839	1.49528	1.71478	1.85171	1.67335	1.98983	3.47434	3.36334	3.65921	3.85575	3.51324	3.84545
CC2G_005043	1.99645	2.07578	1.37	0	1.82392	1.57485	2.70718	0	1.28531	1.23091	1.02641	1.17018	1.2274	1.18199	1.21728	1.54195	1.63526	1.73904	1.12832	0.954852	0.906187	1.49719	1.28322	1.18953	1.90151	1.49602	1.86171
CC2G_005044	8.65336	8.43884	8.59337	8.75471	8.73433	8.96497	10.7936	10.9131	8.42001	8.91883	8.64053	8.60176	8.50083	8.84602	8.58347	9.04908	9.36124	9.2166	8.17388	8.26901	8.40951	7.51892	7.58399	7.51384	8.45704	8.55361	8.66132
CC2G_005045	1.8331	1.19301	1.68643	5.10462	5.79751	5.2706	4.3589	4.31199	5.58499	4.56181	4.75664	5.14765	4.67489	5.19098	5.39892	5.39687	4.37655	4.04231	4.79416	5.17874	5.25466	3.86628	4.1588	4.16326	3.6844	2.92115	2.98001
CC2G_005046	1.04818	0	0	0	0	0	1.84902	1.40851	1.00442	0.511383	0.628317	0.700615	0.995425	0.853982	0.898542	0	0.364282	0.415779	0.775363	0.700961	1.15298	2.28719	2.35879	1.97641	1.21248	0.382322	0.935008
CC2G_005047	0.890903	1.0878	0	2.11792	0	1.57485	1.30097	0.732788	1.00442	0.581417	0.522667	0.322019	0.430589	0.489277	0.708172	0	0.131914	0.222816	0.439156	0.39264	0.368893	4.01012	3.47916	3.68937	3.52843	3.78077	3.5027
CC2G_005048	0.890903	0.974322	0.397192	0	1.18283	0	0.723026	1.10985	0.655293	0	0.348097	0.459556	0.261511	0.489277	0.3652	0	0	0	0.307087	0.248141	0.232436	3.57743	3.72423	3.86344	3.03471	3.36533	3.55338
CC2G_005050	6.7762	5.63103	5.83138	4.95727	5.44467	5.67626	6.39993	6.43811	5.40093	5.63752	5.78644	5.56078	5.73651	5.83884	5.70804	5.68423	5.49937	5.32281	5.21622	5.32099	5.21673	5.87061	5.98511	5.9628	6.16658	6.14755	6.69684
CC2G_005054	3.47836	4.0667	3.43632	1.41702	0	2.9254	3.11187	2.53565	4.25629	4.10741	3.78925	4.0228	3.38403	3.46413	3.59234	2.74007	2.71223	3.05185	3.78135	3.69474	3.99783	2.482	2.70174	2.56308	2.86449	2.95917	2.55176
CC2G_005055	4.33789	3.27537	2.84406	3.22523	2.7476	2.9254	5.17531	5.11912	2.8441	3.16045	2.91631	2.93113	2.67034	2.85383	3.41668	2.56469	3.02381	3.49811	2.84145	2.80852	3.2133	3.29581	3.29754	3.53852	4.79455	4.65964	4.94907
CC2G_005056	7.33547	5.6357	5.65204	6.84025	6.97133	7.35704	9.56826	9.53933	6.52781	7.51799	6.94864	6.73092	6.36946	6.5489	7.15302	5.83542	6.59328	6.99541	6.24824	6.12157	6.59171	7.0599	7.16801	7.16531	8.63894	8.45892	8.87253
CC2G_005057	7.60526	6.34112	6.3176	10.0924	10.4786	10.9671	10.3567	10.3206	9.0818	7.91674	7.81715	7.44909	7.89807	7.97768	7.9057	7.19766	7.21569	7.22157	7.01887	6.94898	6.76713	8.096	8.19834	8.07663	8.36869	8.50544	8.23709
CC2G_015296	0.279274	0.567895	0	0	0	0	0	0	0.364536	0.437774	0.348097	0.700615	0.136673	0.29949	0.230002	0.149585	0	0	0	0.322199	0	0.667246	0.981853	0.971286	0.266241	0	0.591308
CC2G_005058	0.513155	1.0878	0.964086	2.94136	2.06196	1.21373	3.36059	3.38285	4.09577	3.81936	3.86685	4.15018	3.25483	3.35451	3.49249	3.5425	3.60909	4.32073	3.74352	3.46884	3.89422	3.08204	3.03018	3.02698	1.21248	1.93813	1.59763
CC2G_005059	3.64772	4.18619	3.75694	0	3.21045	3.61053	3.42755	4.1865	3.57577	3.64227	3.47912	3.32234	3.87898	4.0707	3.72397	3.51519	3.52159	3.94659	4.22737	4.32772	4.10919	4.76694	4.80508	4.61359	5.65683	5.39802	5.67393
CC2G_005060	8.48341	7.86726	7.77202	7.61787	7.50784	7.84906	10.1756	10.1818	7.05159	7.38356	7.43755	7.24124	7.7683	7.53804	7.90605	6.78536	7.13298	7.1966	7.28389	7.16814	6.90118	7.65015	7.78532	7.82997	7.00426	7.21698	7.07301
CC2G_005061	5.29394	5.25329	5.12568	5.57802	5.90845	5.51911	5.52534	5.56466	5.93942	6.49612	6.64937	6.5646	6.78078	6.75092	6.70855	6.0752	6.07571	6.37797	6.50152	6.44945	6.16476	6.45606	6.63043	6.67801	8.57674	8.06022	8.47299
CC2G_005064	0	0	0	0	0	0	1.47988	1.21642	2.244	1.93964	1.67041	1.12953	1.50502	1.21821	1.53665	0.408985	0.364282	0.531427	0.918025	0.644344	0.764914	1.55607	1.8858	1.2229	3.24977	2.88209	2.69408
CC2G_005065	0.714357	2.07578	2.11366	7.95542	8.13485	8.79327	2.74268	2.21418	6.87205	1.93964	2.2527	1.3926	1.90018	1.79914	1.47818	0.863446	0.564363	1.11707	0.775363	1.13002	0.764914	0.234393	0.156663	0.341223	0.266241	0	0.382908
CC2G_005066	3.58491	4.09412	4.32312	9.17726	9.50693	9.64363	7.65623	7.51967	7.99016	6.98135	6.76465	6.5367	5.74054	5.68882	6.65347	4.878	4.52792	5.08798	5.45143	5.45459	5.36893	4.10191	4.2957	4.09732	3.20291	3.72668	3.70679
CC2G_005068	0.890903	3.17621	3.05131	0	1.18283	0	0	0.581482	1.28531	0.581417	0.348097	0.459556	0.533215	0.656975	0.3652	0.678863	0.131914	0.638488	0.724492	0.459801	1.36365	1.04157	1.10236	1.01003	3.06996	3.10198	2.82362
CC2G_005069	5.30178	5.32449	5.67907	7.1427	7.01449	7.52663	5.83175	5.77108	6.40594	6.13196	6.02518	5.91483	6.14781	5.81834	6.1356	6.09493	5.98811	6.1538	6.34824	6.21444	6.26217	5.54869	5.57894	5.78153	4.85641	4.95607	4.98182
CC2G_005070	0	0.402256	0	0	0	0	0	0	1.84286	3.94422	3.57473	3.2578	2.91804	2.70863	3.43217	0	0	0.290046	0.374632	0.248141	0.368893	0.819218	0.426659	0.616978	0.856533	1.14649	1.5485
CC2G_005073	2.56375	2.54191	2.5246	4.79314	3.70786	3.53043	2.93905	3.26364	2.59232	2.6755	2.6664	2.22918	3.19347	2.69585	3.05602	2.07823	2.32808	2.51902	3.01023	3.06728	3.43159	3.0414	2.86964	2.91915	1.90151	1.73394	1.33333
CC2G_005075	0.971684	0.567895	0.841857	2.11792	2.06196	1.57485	1.47988	1.31566	1.95408	2.0175	2.85233	2.79481	2.57733	2.53287	2.44258	2.74007	2.7435	2.53296	2.41387	2.50891	2.45601	1.58464	1.69455	1.97641	2.01438	2.24562	2.1189
CC2G_005076	3.85358	3.43402	2.71072	6.45709	7.04256	6.8635	6.14529	6.27507	7.06404	7.50453	7.79888	7.74613	7.58894	7.43602	7.44874	7.07326	6.98545	6.93564	7.51006	7.52736	7.45937	6.11785	6.19052	6.26666	6.86195	6.97283	6.93169
CC2G_005077	7.7418	6.83534	7.04846	6.0835	6.62654	6.64317	7.11828	7.25326	6.86673	6.77173	7.05253	7.08327	7.10777	7.20232	7.20858	6.99387	7.07628	7.10389	7.09656	6.97862	7.05514	7.6138	7.75614	7.88897	7.88014	7.81143	7.91369
CC2G_005079	0.400949	0	0.708306	0	2.7476	3.68642	0	0	2.19955	3.8121	3.4215	3.02277	3.41796	3.14472	3.18956	0.0767305	0.364282	0.222816	0.500916	0.248141	0.552061	4.33414	4.64894	3.91539	4.34731	4.50756	4.13056
CC2G_005080	2.03456	2.72847	2.60195	2.11792	3.96417	3.44562	2.74268	2.76366	5.17277	5.38925	5.743	5.52597	5.30576	5.0143	5.2276	4.80658	4.79997	5.04484	5.29243	5.21321	5.2235	5.29144	5.27782	5.16597	5.63346	5.54591	5.24342
CC2G_005082	0.617261	0.851145	0	0	0	0	0.406341	0.412428	3.37054	3.94422	3.85057	3.42668	3.80399	3.86336	3.9124	0.576887	1.19697	1.04105	1.53489	1.17068	1.11467	1.86638	2.09394	2.12501	2.47511	2.77957	2.44842
CC2G_005083	5.72231	5.86394	5.55326	6.15288	6.32892	6.20095	6.58242	6.45454	5.51869	6.09652	5.63465	5.62798	5.85022	6.11457	5.71913	4.75789	5.107	4.70944	5.46699	5.09143	5.34016	6.27181	6.03895	5.95785	6.17065	5.93741	6.2164
CC2G_005084	9.40573	9.27768	9.34451	7.60555	8.12504	7.65495	6.17807	6.15626	7.68323	6.71736	7.02196	7.11875	6.70448	6.52741	6.65595	7.47871	7.4616	7.52999	7.39023	7.50964	7.36307	6.53319	6.82104	6.66213	7.46611	7.43925	8.10103
CC2G_005085	5.64436	5.59309	5.263	5.03282	5.56568	5.36599	4.61017	4.56488	5.8808	6.40852	6.5309	6.48427	6.07312	5.80352	6.16717	5.38561	5.30517	5.4403	5.66882	5.65058	5.71139	4.13608	4.09245	4.24268	5.07167	4.64805	5.40393
CC2G_005086	0	0.215102	0	0	0	2.1038	0	0	2.90073	2.52368	2.61592	3.03382	1.80082	1.97876	2.19281	2.64248	2.95422	3.55388	2.41387	2.28648	2.62906	0.234393	0.297968	0.146306	0.266241	0	0.266211
CC2G_005087	0	0	0	0	0	0	0	0	2.00663	1.27385	1.71905	2.17028	1.2274	1.35461	1.50771	2.11508	1.82264	2.51902	1.87522	1.85896	2.05197	0	0.156663	0	0	0	0
CC2G_005088	5.9512	5.4412	5.71433	4.95727	5.42348	5.14174	5.49964	5.53408	4.9891	4.96368	4.77688	5.0421	4.84165	4.97515	4.78747	5.90809	5.8867	5.84979	4.85455	5.33448	5.38913	5.83241	6.01867	5.89843	5.20844	5.18591	4.8663
CC2G_005089	0	0	0.397192	0	0	1.57485	1.09668	1.57799	4.16676	2.82734	2.81925	3.20008	3.00989	3.05745	2.65542	4.27457	4.32234	4.76957	3.48541	3.85924	4.06969	2.21594	2.13219	2.14255	1.82105	1.33181	1.82092
CC2G_005091	8.05733	8.27327	8.39371	6.88171	7.0701	6.97361	7.4108	7.56576	6.71314	6.70663	6.85584	6.67993	6.94975	6.72755	6.91274	6.76231	6.61106	6.75262	7.00294	6.82072	6.68372	7.20438	7.20325	7.25171	6.74415	6.73875	6.74124
CC2G_005092	3.59769	3.82624	4.0191	6.25106	6.12084	5.58007	8.82088	8.59195	5.80864	7.11796	6.95246	6.88004	6.58563	6.56656	6.68209	5.88294	6.40236	6.36243	6.15287	6.01535	6.33688	7.46136	7.43703	7.46848	6.53778	6.72915	6.50578
CC2G_005093	0	0.71646	0.841857	0	1.18283	0	0.858618	0	2.44778	3.54045	3.30683	2.78175	2.97385	2.70863	2.81747	0.467151	0.610329	0.415779	1.77879	1.97829	1.87991	2.59863	2.16945	2.57605	1.73583	1.73394	1.86171
CC2G_005094	0.617261	0.402256	0.561119	0	0	0	0	0.412428	0.655293	0.278232	0.218754	0.169976	0.376402	0.0808996	0.656378	0.285108	0.131914	0.1523	0.236223	0.523974	0.302278	0.719702	0.981853	1.01003	0.773445	0.772326	0.591308
CC2G_005095	0	0	0.964086	2.11792	1.18283	0	0.573356	0.412428	7.60017	7.53463	7.23032	6.34364	7.54816	7.81981	7.99442	2.13316	2.08929	3.51928	6.05332	5.97	6.08774	1.95657	2.24121	2.03394	1.90151	1.97572	1.64513
CC2G_005096	0	0.71646	0	0	0	0	0.858618	0.732788	7.36255	7.38539	7.13102	6.465	7.26376	7.34478	7.47887	2.74007	2.7435	3.07109	5.35229	5.33894	5.49358	3.37153	3.96578	3.55171	3.83541	3.84311	3.6613
CC2G_005097	0.400949	1.38287	0.708306	0	1.18283	0	1.09668	1.31566	0.897165	0.888173	1.10171	0.755073	1.2274	0.807195	0.806495	0.218937	0.193608	0.638488	0.560142	0.459801	0.368893	1.97827	2.29278	2.36808	2.39399	2.18273	2.21649
CC2G_005098	6.11798	7.69214	7.61645	6.25106	6.3738	5.73104	7.44353	7.14105	4.94265	5.08919	5.01465	4.89526	5.20831	5.39063	5.00756	5.33379	5.28228	5.01285	4.95175	5.06201	4.77903	4.72585	4.93788	4.67516	3.55355	4.17741	3.62622
CC2G_005099	6.36414	5.31286	5.50876	7.40688	7.70075	7.60693	5.15569	5.3935	6.78635	7.31583	7.15553	7.13102	6.77752	6.96519	7.07626	5.52904	5.8344	5.8074	6.58052	6.92467	7.23052	7.75676	8.04105	7.87001	9.43675	8.74602	8.86283
CC2G_005100	3.28643	1.96131	1.82193	2.94136	1.18283	1.57485	1.20244	1.21642	1.52032	1.39548	1.76611	2.10888	1.19646	1.21821	1.10584	1.10241	1.10364	1.15363	0.617031	1.08818	0.860616	0.497359	0.544805	0.666326	1.14797	0.772326	0.685209
CC2G_005101	5.03668	4.54531	4.86044	8.26055	8.77464	8.94	6.69315	6.84761	8.29222	8.95926	9.25875	9.34447	8.88188	8.81032	8.92953	7.05145	7.39709	7.49212	8.72064	8.95027	8.99981	8.03359	8.33658	8.16351	9.66891	9.08707	9.32385
CC2G_005102	3.11919	2.92453	2.81186	5.97275	6.56012	6.27655	3.85806	3.99019	5.30454	4.81898	4.60636	4.48425	5.32913	5.3174	4.84065	5.07087	5.16782	4.71251	4.88092	5.0674	5.152	3.33837	3.59325	3.32465	4.86145	4.14479	4.72973
CC2G_005104	2.10787	1.90048	2.16555	5.03282	3.96417	4.18203	6.84376	6.77099	4.46786	3.81936	3.56811	3.79484	3.03634	3.10658	3.12433	3.20066	3.13019	2.98241	3.49303	3.54813	3.29265	3.53415	3.54444	3.40679	4.69082	4.9932	4.51637
CC2G_005105	0.279274	0.567895	0.561119	2.58761	0.709386	1.86343	2.5153	2.10743	1.6581	0.942409	0.576459	1.04463	0.581914	0.943237	0.708172	0.678863	0.820465	1.07956	0.617031	0.807935	1.07531	0.371859	0.803713	0.971286	0.685278	0.933809	1.00951
CC2G_005106	1.12082	0	0	4.70349	3.90423	4.33133	2.03229	2.72807	2.69196	1.73976	1.96071	1.70076	2.09731	2.06083	2.24634	1.96167	1.88006	1.73904	2.88842	2.94369	2.20567	2.19756	2.15094	2.27571	1.64526	1.89954	1.7357
CC2G_005107	0.146384	0	0	2.11792	0.709386	1.21373	0	0.732788	0.517227	0.511383	0.576459	0.322019	0.3201	0.230242	0.3652	0.348376	0.610329	0.290046	1.00585	0.322199	0.432569	0.234393	0.229045	0.146306	0	0.139006	0.139237
CC2G_005109	2.39826	2.65671	2.67537	2.94136	1.82392	2.65018	1.3932	0.994777	3.96909	3.19437	3.29885	3.16028	3.34928	3.25342	3.40888	4.22486	4.0947	4.72774	3.73712	3.68775	3.60742	2.66702	2.7761	3.12731	3.12126	2.01235	2.44842
CC2G_005110	6.99611	7.0623	6.97221	5.85279	5.81389	6.13477	6.98938	7.00271	6.11423	6.3744	6.36982	6.25193	6.31017	6.39821	6.16138	6.25104	6.27437	6.36438	6.15047	6.03476	6.30533	6.72504	6.78097	7.06251	5.25895	5.16978	5.75466
CC2G_005111	4.4408	4.99417	5.23292	7.61787	7.87089	8.39848	8.72764	8.56636	6.82161	5.97494	5.88032	5.55887	6.07737	6.10856	5.89284	4.52444	4.48539	4.37593	5.31839	5.09143	4.87956	5.85164	5.58067	5.68456	6.34802	6.33093	6.37628
CC2G_005112	6.467	5.71292	5.82736	6.01062	6.28259	5.78382	6.40271	6.44361	6.38376	6.49498	6.82214	6.6515	6.81046	6.75323	6.6837	6.33642	6.35927	6.44126	6.85115	6.74112	6.68045	7.23849	7.38303	7.43283	7.93911	8.01525	7.79563
CC2G_005113	1.25598	1.46918	0.708306	2.11792	2.26623	2.65018	1.78237	1.79989	6.0247	6.03233	5.95075	6.4893	5.33091	5.1887	4.91692	7.53461	7.72026	8.42875	6.60182	6.9964	7.16056	6.274	6.01612	6.46009	4.38978	4.34475	3.92459
CC2G_005114	0	0	0.708306	0	0	0	0	0.412428	0.897165	0.712044	0.987225	1.12953	1.0656	0.985876	0.299184	1.48678	1.13543	1.15363	1.08864	0.907523	0.906187	0.234393	0.363748	0.279131	0.266241	0	0.139237
CC2G_005116	0	0	0	0	0	0	1.56165	1.21642	0	0.648208	0.284874	0.169976	0.883322	0.758839	0.853253	0.628776	0.416963	0.738151	0.307087	0.459801	0.432569	0.160414	0	0	0	0	0
CC2G_005118	0.400949	0.402256	0.561119	0	0	1.21373	0	0	3.59306	2.09137	2.18506	1.90723	2.1628	1.89174	2.38009	0.408985	0.416963	0.222816	1.75363	1.64478	1.51839	1.33851	2.13219	1.83251	2.57663	1.59594	1.93999
CC2G_005119	1.95731	2.76305	2.93655	0	0	0	0.723026	0.994777	1.19762	1.141	0.987225	1.0877	1.16484	1.21821	0.488808	2.55131	1.59009	2.08026	1.92112	2.49297	2.60162	2.252	1.99362	2.4549	2.24775	2.11697	1.93999
CC2G_005120	7.37869	6.6675	7.02583	7.17641	6.99307	7.34538	6.56269	6.75561	6.84164	6.40852	6.61364	6.64341	6.63695	6.44671	6.67316	7.44971	7.38887	7.62622	6.91706	6.99782	6.97588	6.65773	6.70211	6.74486	6.56583	6.50007	6.70247
CC2G_005143	0.279274	0.402256	0.561119	0	1.82392	1.21373	0	0	0.517227	0.278232	0	0.169976	0.200442	0	0	0	0	0	0	0	0.159041	0.160414	0.486941	0.279131	0	0	0
CC2G_005144	1.31909	1.29106	1.18127	6.53712	6.05346	6.788	1.84902	1.79989	4.81587	3.35295	3.65193	3.10893	3.70853	4.01517	3.47764	0.774105	1.67905	1.6901	2.07118	1.21022	1.94686	3.88937	3.62713	3.505	2.08499	2.04807	2.42139
CC2G_005146	1.59886	2.72847	2.40019	0	0	0	0	0.220902	1.19762	0.648208	0.628317	1.0877	0.803435	0.943237	1.21728	2.27016	2.12139	1.73904	2.39773	2.64499	2.47125	1.1602	0.895531	0.848389	1.0096	0.590463	1.21238
CC2G_005147	5.03668	3.65267	3.65173	0	3.1079	2.79434	2.43077	2.57625	7.84619	7.92728	7.93219	7.8058	8.35456	8.11307	8.27117	8.66006	8.61447	8.51471	7.23475	7.51803	7.31478	5.51198	5.54567	5.24321	5.73577	4.94664	5.62145
CC2G_005148	7.07593	7.01287	6.95204	5.76688	5.67733	5.53972	6.07393	6.29952	6.03423	6.37194	6.57038	6.47517	6.34145	6.23325	6.36468	6.2777	6.15732	6.29448	6.37632	6.35559	6.17759	6.8836	7.01584	6.9728	6.63953	6.46416	6.83385
CC2G_005149	2.33859	2.32759	1.88519	3.46232	2.99751	3.82717	5.94655	5.9283	4.30955	4.26468	4.11876	4.37981	4.28409	4.24757	4.33108	4.41048	4.48847	4.32073	4.03725	4.13056	4.20347	4.10684	4.06799	4.01875	1.54862	2.33509	1.77894
CC2G_005150	0	0.402256	0.212222	0	2.26623	3.15643	0.406341	0.412428	3.15467	2.20665	2.52309	2.30414	3.43794	3.46413	2.65542	1.69583	1.44543	1.66499	2.22549	2.13033	2.24167	2.06192	1.34966	1.72016	0.266241	0.265787	0.266211
CC2G_005151	0.400949	0.402256	0.212222	0	2.44513	1.86343	0	0	1.78387	1.39548	1.51379	1.20971	1.86125	1.44907	1.69905	0.863446	1.03788	1.11707	0.918025	1.00068	0.813558	0.770318	0.850352	1.25551	0.266241	0.382322	0.266211
CC2G_005152	0.279274	0.567895	0	0	2.60428	2.65018	0	0.581482	2.36968	1.73976	2.21928	1.97762	2.56527	1.93591	2.09892	1.51463	1.65732	1.32371	1.85171	1.75584	1.83349	2.35509	1.8858	2.24355	0.38295	0.382322	0.490867
CC2G_005153	0	0	0	0	0	0	0.406341	0.412428	0.364536	0.712044	0.94695	0.585115	0.995425	0.656975	0.488808	0.408985	0.364282	0.290046	0.824501	0.907523	0.552061	1.61265	1.31683	1.46523	0.266241	0.590463	0.266211
CC2G_005154	0	0	0.708306	0	0	0	0.723026	0	3.10734	1.43385	0.987225	1.3926	2.06341	1.59393	1.14395	2.67985	1.84204	1.91972	2.22549	2.0885	1.98983	0.91231	1.41318	0.279131	2.33726	1.73394	1.69113
CC2G_005155	6.24529	3.671	4.48501	5.52667	5.73006	5.81796	7.91729	7.97637	5.91557	6.47787	6.57946	6.48427	6.74113	6.61914	6.90305	5.26167	5.46382	5.73987	5.92262	5.96423	5.51947	7.30598	7.47054	7.34132	6.07196	6.52247	5.92312
CC2G_005156	3.11919	2.32759	1.94579	3.46232	4.13034	4.50903	5.25121	5.21863	5.22914	5.35217	5.33056	5.30194	5.43067	5.34017	5.38705	5.43015	5.31388	5.52646	5.46505	5.5111	5.58223	3.86628	3.86149	3.91539	3.4369	3.60004	3.55338
CC2G_005157	5.29786	4.29655	4.14074	4.27603	4.07705	4.97018	3.84179	3.57537	5.50506	5.25372	5.65041	5.5985	5.72572	5.50682	5.54671	5.85053	5.73805	5.70796	5.4995	5.56547	5.36893	4.53413	4.52504	4.46115	4.25079	4.46194	4.43761
CC2G_005158	0.400949	1.29106	0.212222	2.11792	0	1.21373	2.19488	2.16179	3.85907	3.02877	3.17356	3.87694	2.81995	2.66993	2.88654	2.48247	2.2431	2.4324	3.30674	3.06728	3.29265	2.8894	3.26348	3.23754	2.47511	2.57438	2.39384
CC2G_005159	6.24935	6.20311	6.04727	4.14595	4.57676	3.82717	5.14247	5.45466	5.05295	5.65793	6.07275	5.90884	6.1346	5.84029	6.15206	5.52904	5.33628	5.44584	6.22212	5.95553	5.88075	6.51846	6.57509	6.57437	8.06455	6.78976	7.39908
CC2G_005161	1.25598	1.38287	1.27872	0	0	0	1.63904	0.869721	4.46786	2.97775	3.08354	2.84588	2.77876	2.36535	2.19281	3.07537	3.02381	3.37965	2.29687	2.71539	2.60162	0.866515	1.28322	1.40836	1.08044	0.933809	0.685209
CC2G_005162	7.72879	7.93423	7.90101	6.75357	7.00024	7.09692	6.01709	6.01944	6.56551	5.96679	6.22471	6.56365	6.18769	6.49456	6.28271	7.2653	6.99035	6.8533	6.88557	7.09938	7.1804	6.48286	6.59406	6.64915	6.8844	6.85927	7.19475
CC2G_005163	0.279274	0.402256	0	0	0	1.21373	1.78237	0.869721	1.78387	1.73976	1.96071	2.20981	1.82124	1.79914	1.82168	0.628776	0.896637	0.738151	1.70198	1.32274	1.48874	2.74502	2.55459	2.91915	1.39032	1.33181	0.773369
CC2G_005198	8.23352	8.62426	8.75238	6.73106	7.2494	6.8635	5.97294	5.93222	7.23346	6.86067	6.94033	7.23467	6.76768	6.94912	6.98407	8.2711	8.286	8.11843	7.7295	8.1102	8.14307	7.29576	7.5814	7.56027	9.00551	9.08599	9.05537
CC2G_005199	2.48338	2.82982	3.02347	3.84426	4.68758	4.07317	2.24525	2.65416	3.62702	3.11395	3.23338	3.01163	3.30646	3.12578	3.14327	3.85178	3.62597	3.90966	3.16131	3.05647	3.26668	3.27843	3.36334	3.42841	4.43779	4.34475	4.48408
CC2G_005200	1.25598	3.55737	3.53824	0	0	0	1.30097	1.40851	0.897165	0.773174	0.818903	0.954417	0.718863	0.603213	0.942453	0.408985	0.564363	0.918933	0.775363	0.907523	0.66241	1.40409	1.38177	1.83251	0.856533	0.490143	0.490867
CC2G_005207	0.513155	0.851145	0.964086	0	0	1.21373	0	0	0.655293	0	0.408664	0.392426	0.136673	0.29949	0.299184	0.628776	0.516883	0.474761	0.374632	0.700961	0.368893	0.667246	0.600438	1.01003	0.38295	0.265787	0
CC2G_005204	7.60842	8.3892	8.58148	8.29932	8.62021	9.21925	5.45754	5.59461	8.41759	7.30358	7.27116	7.52107	7.20619	7.6024	7.32357	8.04391	7.92794	7.98309	8.26459	8.56431	8.65721	6.92678	7.1789	7.04512	8.98805	8.54348	8.99304
CC2G_005208	3.96629	3.17621	3.8068	2.11792	1.82392	2.1038	2.74268	2.40654	2.48529	2.57608	2.34857	2.45981	2.49071	2.66993	2.84086	1.64634	2.2431	2.54678	1.87522	2.21051	1.90258	3.86628	3.77347	3.59695	3.39582	4.07724	3.5027
CC2G_005209	4.01475	4.50501	4.28844	0	2.60428	3.75851	4.15007	3.7452	3.28803	2.89765	3.06484	2.75528	3.26232	3.11621	3.52173	2.5378	2.40833	2.94118	2.44563	2.249	1.98983	3.71945	3.91732	3.77622	4.13074	3.80185	4.05343
CC2G_005210	6.13999	5.86394	5.84337	5.03282	5.48615	5.36599	6.29326	6.31159	5.36113	5.26707	5.40864	5.55887	5.50674	5.40248	5.62963	5.71606	5.78265	5.71256	5.40574	5.54242	5.5752	6.13486	6.26019	6.14899	5.23197	5.52387	5.5295
CC2G_005211	1.54708	1.29106	1.18127	4.60791	4.79049	4.42291	4.73878	4.92062	4.61896	2.75341	3.0459	3.60775	3.16977	3.27936	3.13383	4.05983	4.11078	4.07604	3.91212	4.07809	4.20803	2.404	2.13219	2.03394	3.98139	3.87329	4.06221
CC2G_005212	0	1.29106	0.397192	0	0	1.21373	0	0.869721	1.44615	0.831819	0.818903	0.807551	0.803435	1.21821	1.02646	0.523062	1.07114	1.04105	1.67544	1.58587	2.18733	3.97278	3.97107	4.16326	1.69126	3.15208	2.08485
CC2G_005213	0.805329	0.851145	1.18127	2.11792	2.7476	1.57485	0.723026	0.869721	4.74804	1.09386	1.17329	1.72824	2.70373	2.47418	2.51707	2.05945	1.34025	1.98203	2.86512	3.74945	4.64769	5.35086	5.8976	5.09115	4.42423	3.10198	3.43673
CC2G_005214	7.20266	6.66521	6.57905	7.15966	7.60045	7.81565	8.24036	8.29106	7.29153	7.60935	7.54137	7.43143	7.49947	7.44894	7.6059	6.71883	6.98327	7.16729	7.01953	7.04779	7.19768	7.58625	7.69636	7.6766	6.37293	6.4724	6.41961
CC2G_005215	4.68794	5.22256	5.17714	6.68497	6.49049	6.43894	6.13197	6.1729	6.96959	7.57059	7.57356	7.29737	7.4959	7.02007	7.47934	7.93574	7.94345	7.72595	7.36605	7.48768	7.59338	5.51754	5.58067	5.59979	7.1524	7.26994	7.14087
CC2G_005216	4.04307	4.02456	4.12772	0	4.07705	4.12863	3.80867	3.63423	4.4957	5.23755	4.97264	4.5396	4.91239	4.85953	4.97357	4.0879	4.31195	4.59447	5.04021	4.85306	4.88526	5.14808	4.9216	5.04991	6.35697	5.65418	6.5122
CC2G_005217	8.85913	8.13654	8.34251	8.9622	9.25132	9.39351	6.76827	6.87227	8.86634	8.52852	8.57638	8.51788	8.42716	8.42678	8.40076	9.40403	9.36638	9.47373	8.23593	8.4417	8.59139	7.10866	7.18346	7.10898	7.72778	7.39832	7.29309
CC2G_005218	0.714357	1.38287	0.841857	0	0	0.730907	0.723026	0.869721	1.89954	0.712044	1.71905	1.3222	1.50502	1.28802	1.59284	1.81261	1.74235	2.08026	1.94354	1.80832	1.80971	1.52693	1.34966	1.78862	1.77907	2.11697	1.90138
CC2G_005219	2.17764	2.28062	2.16555	2.11792	1.5387	2.49	1.97375	2.69159	3.73997	3.66663	3.65818	3.44336	3.66398	3.47913	3.82126	3.58252	3.72331	3.9203	4.36244	4.30962	4.27034	4.66362	5.057	4.68716	4.52926	4.85381	4.27347
CC2G_005220	2.10787	1.55062	2.00394	5.81047	6.81735	6.1616	3.98204	4.10562	6.99582	7.49038	7.48755	7.72241	7.08049	7.10896	7.17447	7.10624	7.08648	7.07797	6.19084	6.54147	6.75239	7.1105	7.07595	7.06136	6.11478	6.35964	6.09976
CC2G_005221	2.58958	3.22665	2.71072	2.58761	3.8417	3.89271	3.19109	2.9295	4.94938	5.16812	5.2808	5.29507	4.81644	4.81588	4.81726	4.74619	4.78251	4.90975	5.04021	5.16873	5.24804	4.68356	4.69119	4.77695	4.62717	4.37319	4.42406
CC2G_005222	0.714357	0	0	0	0	1.21373	1.56165	2.16179	2.6263	2.81285	2.93702	2.80775	2.32894	2.10017	2.42721	2.52416	2.97194	3.41019	2.18843	2.10956	2.20567	1.46682	1.14039	1.01003	4.83609	1.81912	3.15432
CC2G_005223	2.39826	2.23207	2.5246	7.03657	6.94925	7.24229	6.21012	6.39905	6.81978	7.08519	7.09519	6.99127	6.44791	6.5489	6.47063	7.16453	7.27932	7.54727	6.75779	6.91199	6.70644	2.8894	2.96809	2.9593	3.06996	2.3918	2.86433
CC2G_005224	3.8852	2.76305	2.96611	4.14595	4.27933	3.95541	5.98411	5.87642	5.294	5.72908	5.71629	5.85998	4.94533	4.99877	4.98674	4.93321	4.96163	5.3087	5.69713	5.66666	5.62715	5.6125	5.70325	5.7461	4.65645	4.77606	4.22739
CC2G_005225	1.49337	2.76305	2.56379	5.03282	5.31258	5.63855	2.43077	2.53565	4.50486	4.06526	4.37928	4.25782	5.31299	5.28788	5.12654	4.75497	4.35983	4.40654	4.98724	4.85618	4.44261	4.0362	3.97107	3.59057	4.43102	4.39416	4.49059
CC2G_005226	3.91615	4.3083	3.90164	2.11792	1.5387	3.2594	0.982555	1.31566	3.41009	3.60071	3.69512	3.83963	3.81422	3.63461	3.66622	3.38545	3.31503	3.29217	4.34149	4.30962	4.33008	4.21586	4.29991	4.50589	1.39032	2.08293	2.47496
CC2G_005227	0.805329	0.71646	0.708306	0	2.44513	1.57485	0	0.732788	2.59232	2.69142	3.3918	3.37545	2.45194	2.29926	2.65542	1.74368	2.02286	2.25868	2.3814	2.55571	2.37729	3.36331	3.47916	3.71304	1.73583	2.08293	2.01424
CC2G_005228	3.75432	3.6153	3.96156	6.18635	5.67733	5.96233	7.51967	7.28116	5.13196	5.15095	5.29691	4.96334	5.45702	5.50132	5.53241	3.2177	3.44121	3.29217	4.31595	4.27741	4.41922	6.2936	6.26127	6.17693	5.35495	5.57068	5.31125
CC2G_005229	1.8331	3.17621	3.75694	4.95727	4.85523	5.59983	4.21469	3.8147	5.03409	5.24026	5.20811	4.85842	5.3661	5.40248	5.15714	4.37293	4.181	3.96213	5.40776	5.16622	5.13536	3.99423	4.2044	3.98511	4.34011	4.35191	4.03571
CC2G_005230	8.81603	8.16187	8.27547	7.83394	7.2792	8.4966	6.42746	6.48684	7.30994	5.98789	6.34194	6.14383	6.32097	6.12534	6.3279	6.4881	6.59471	6.55667	6.00085	6.03062	6.16944	5.44734	6.02122	5.54477	4.20396	4.39416	4.12219
CC2G_005231	8.12953	7.95868	8.08907	7.09061	7.02859	8.01645	6.43562	6.50008	6.75598	5.49056	5.65666	5.34474	5.8773	5.74576	5.7657	6.18867	6.19364	6.07973	5.46699	5.17124	5.28301	4.70323	5.43144	4.69313	3.46365	3.88321	3.52826
CC2G_005232	0	0.402256	0	0	0	0	0	0	1.00442	0.942409	1.06455	1.04463	0.921666	1.18199	0.656378	0.628776	0.516883	1.22409	1.16693	1.35838	1.39595	0.371859	0.426659	0.71404	0.935096	0.684258	0.856451
CC2G_005234	0	1.0878	1.07676	0	0	0	0	0	1.19762	0	0	0	0	0.157503	0	0.819467	0.564363	0.585951	2.34818	1.35838	2.66927	0.234393	2.49712	0.341223	1.54862	3.71562	2.82362
CC2G_005233	7.41435	7.05534	7.17251	7.03657	6.39573	7.28564	5.45754	5.46009	6.63809	5.42064	5.68602	5.66933	5.56846	5.4413	5.59737	5.21151	5.40635	5.45319	5.05829	5.19607	5.17778	6.21584	6.39706	6.37359	5.13129	5.6686	5.49426
CC2G_005235	4.83013	5.92248	5.59169	8.35189	8.89885	8.85828	6.07741	5.95163	7.80599	6.25492	6.31352	6.66223	8.44063	8.69056	8.27117	7.96347	7.94737	8.05733	8.22023	8.72266	8.29534	6.46952	6.47168	6.515	8.97184	8.96623	9.06713
CC2G_005236	5.5974	6.1809	6.12139	4.39534	5.14143	5.00023	5.0392	4.82279	5.68108	5.88952	5.85878	5.91483	5.96482	5.82128	5.89843	5.97977	5.91216	5.9098	5.90844	5.97431	6.13397	6.30759	6.40879	6.35208	6.35875	5.65418	6.07829
CC2G_005237	2.63988	2.50152	2.21563	2.11792	0	1.21373	5.90799	6.01576	3.03328	2.09137	2.49543	2.97768	2.54084	2.29926	2.86388	2.82036	2.81395	4.59114	5.39358	5.3434	5.20538	5.05927	4.45885	4.68716	4.21187	4.79195	4.20378
CC2G_005238	6.23305	5.4624	5.40466	4.70349	5.33545	5.16845	5.07445	4.94407	6.06553	6.15798	6.35547	6.46806	6.10054	5.70167	6.01355	6.40405	6.36598	6.58036	5.95332	5.85931	5.76957	6.57116	6.6077	6.73477	7.65567	7.64206	7.71026
CC2G_005239	6.65455	6.80454	7.06392	6.15288	6.06719	6.17484	7.86792	7.80336	5.57197	6.06936	5.98472	5.90884	6.12437	6.00223	6.22388	5.6934	5.70401	5.71715	5.5804	5.63432	5.413	5.58978	5.5545	5.60612	7.22553	7.3274	7.26295
CC2G_005240	3.50574	3.59625	3.68766	4.50553	5.56568	5.69475	4.30056	4.21249	5.02775	5.04958	4.95751	5.3336	5.50516	5.57124	5.60934	7.28514	6.80636	6.64919	5.75214	5.73942	5.40905	4.13608	3.92823	4.31795	4.03588	3.81227	3.97193
CC2G_005241	8.21393	8.20652	8.32764	5.17301	5.93864	6.36003	8.30856	8.28342	6.05621	5.70379	5.75179	5.41196	6.13358	5.77645	5.80489	6.13697	6.2699	6.55154	5.98202	5.33	5.26125	6.33832	6.41268	6.34357	4.91089	5.18991	4.85118
CC2G_005242	5.47804	4.80798	4.55477	4.50553	5.44467	5.05851	5.41966	5.48162	4.71683	4.47248	4.69718	4.44752	4.58815	4.37735	4.78144	4.07393	3.89562	4.21226	4.66522	4.4525	4.51793	4.58803	4.54644	4.52273	3.78327	4.24053	3.87564
CC2G_005243	6.42816	4.48443	4.6849	5.36065	4.41437	4.46662	5.62856	5.7312	6.65671	5.99913	6.50426	6.54252	6.67813	6.5788	6.97947	6.68016	6.4537	6.79084	6.2893	6.29825	6.22219	6.23624	6.19052	6.18118	6.99512	7.43419	7.12943
CC2G_005244	1.54708	2.5812	1.61359	0	0	0	0	0.412428	3.62702	2.18432	2.55023	3.01163	2.76828	2.72131	2.87526	5.02562	5.13871	5.8484	4.95726	5.25635	5.34637	1.58464	1.47402	1.6966	5.85169	5.2828	5.94227
CC2G_005245	1.8331	1.0878	1.18127	0	0	0.730907	0	0.994777	3.75541	2.59313	2.2527	2.49223	3.26977	3.26212	3.31178	3.39298	3.69159	3.67201	3.6981	3.66658	3.08046	0.91231	0.755516	0.666326	2.50116	2.04807	2.52661
CC2G_005246	3.8103	2.95476	2.77893	2.11792	0	1.21373	3.53268	3.13368	4.75573	4.44457	4.53343	4.74527	4.82658	4.89352	4.63526	5.20938	5.14067	5.24235	5.68388	6.00555	5.84024	5.05927	4.71659	5.03824	3.2187	3.13557	3.24961
CC2G_005247	3.54587	2.32759	2.56379	4.39534	5.35797	5.22043	5.30562	5.18622	6.20698	6.53414	6.31352	6.22927	5.74322	6.10856	6.09727	5.55274	6.04466	6.58789	6.30236	6.38072	6.47937	5.20669	5.10588	5.36216	2.94263	2.82146	2.82362
CC2G_005248	3.04647	2.76305	3.18301	8.16303	8.73862	8.94	6.06695	6.10169	8.34738	8.26083	8.31253	8.25164	8.25625	8.15367	8.2258	8.87202	8.84882	9.02316	7.62979	7.90523	7.93759	8.08354	8.28631	8.13147	10.231	9.8294	10.0659
CC2G_005260	6.8595	6.91246	6.83877	5.6276	5.99719	5.76644	6.84784	6.61657	6.06553	6.40972	6.15571	5.90734	6.2708	6.3992	6.31125	6.46241	6.45999	6.45506	6.60797	6.80305	6.83203	6.76459	6.67645	6.55157	6.53147	6.61767	6.37275
CC2G_005262	3.0277	3.70697	3.55778	0	3.48049	3.61053	2.63346	2.16179	3.15467	2.72275	2.75071	3.06649	2.64765	2.77092	2.75728	3.41531	3.70224	3.60098	3.25391	3.5404	2.96678	2.28719	2.46751	2.61427	2.78187	2.44637	2.44842
CC2G_005263	6.3604	5.82355	5.85921	2.11792	3.21045	3.04553	3.51226	2.45087	3.70859	3.3429	3.74882	3.42668	3.45764	3.36262	3.57152	4.12451	3.82915	4.34069	3.90071	4.07809	3.97663	4.18354	3.84431	4.16755	7.56284	7.82565	7.49215
CC2G_005250	5.07832	5.08582	5.01691	2.94136	1.82392	1.21373	4.05445	4.33583	5.44444	5.09518	5.10665	5.32687	5.09753	5.32364	5.34268	5.51705	6.04988	6.53431	6.44961	6.34007	6.56443	4.86917	4.7902	5.06378	4.61529	5.09917	4.80487
CC2G_005251	9.64562	9.76602	9.87302	6.88171	7.42496	7.14478	5.97294	5.9165	7.3726	5.99913	6.52236	6.86309	6.16788	6.23987	6.19694	7.98789	7.69615	7.37024	6.82649	7.29079	7.25715	5.68355	5.97856	6.04322	7.00426	6.84157	7.59628
CC2G_005252	5.78791	5.16554	5.41005	8.21262	8.37732	8.83971	8.74086	8.791	7.97951	8.23662	8.22209	8.18409	8.27117	8.2522	8.58693	7.61319	7.76476	7.99668	7.53564	7.65911	7.63373	9.51069	9.59459	9.51045	10.7525	10.7681	10.6844
CC2G_005253	6.51158	4.81624	5.04488	7.89596	7.60517	8.42917	8.60101	8.46462	7.08558	6.59783	6.55539	6.4024	6.86128	6.83859	6.41619	6.11326	6.35252	6.1784	6.81133	6.5405	6.42757	6.73463	6.98351	6.85869	5.71921	5.82092	5.50718
CC2G_005254	1.54708	1.46918	1.07676	0	0	1.57485	0.573356	0.994777	1.10425	1.09386	1.45756	1.3926	1.13251	1.44907	1.10584	1.02707	0.968989	1.25806	1.44347	1.39316	1.19029	1.12173	1.86324	1.49285	0.856533	1.33181	0.856451
CC2G_005255	1.95731	0.567895	1.45585	0	0	0	0	0.869721	1.19762	1.54318	1.81168	1.95453	1.78009	1.59393	1.62013	1.39986	1.47057	1.50442	1.92112	2.02339	1.65813	1.84293	2.01425	1.93674	1.54862	1.21095	1.3902
CC2G_005256	3.00868	2.01968	2.00394	3.22523	2.26623	2.1038	2.08855	1.99216	3.28803	2.72275	3.08354	3.11935	3.38403	2.84227	2.58791	3.43001	3.396	3.67201	3.94583	3.65946	3.56543	3.51943	3.54444	3.59695	2.42154	2.73643	2.2476
CC2G_005257	10.2955	11.9752	11.9194	8.28393	9.02204	8.47536	5.2326	4.65291	6.95294	6.75478	5.48797	6.08127	6.08267	7.19949	6.21942	9.42344	9.44468	9.1341	8.30139	8.22112	8.25902	4.72906	4.6588	4.83745	6.68571	6.5846	6.95072
CC2G_005269	1.04818	0.71646	0.561119	0	0	0	0.858618	0	0	0	0.678375	0.322019	0.136673	0	0	0.149585	0	0	0.374632	0	0	0	0.426659	0.279131	2.01438	2.3918	2.18469
CC2G_005275	0.146384	0	0	0	0	0	1.30097	0.581482	0.364536	0.360207	0.576459	1.00023	0.581914	0.29949	0.758171	0.348376	0.416963	0.638488	0.617031	0.39264	0.60829	0.234393	0.080457	0.146306	0	0	0
CC2G_005264	0.890903	1.19301	0.708306	0	0	0	1.47988	1.72965	2.15368	2.3134	2.31732	2.32229	2.46498	2.26505	2.50248	2.00158	2.18353	2.11776	1.94354	1.93174	1.71045	2.98893	3.26348	3.39951	2.64833	2.73643	2.21649
CC2G_005265	4.4689	3.87449	3.77375	0	3.96417	2.79434	4.72997	4.29992	3.37054	2.9647	3.11114	3.06649	2.98295	3.25342	3.09545	2.77503	2.76398	3.18144	3.12254	3.04558	3.04015	3.4278	3.66023	3.67738	2.90409	2.86216	2.52661
CC2G_005266	2.63988	2.23207	2.11366	3.66589	3.21045	3.35552	5.14247	5.02694	3.32987	3.77522	3.77206	3.77521	3.6063	3.75659	3.87323	3.23455	3.3357	3.5052	2.85333	3.13048	3.09037	3.98355	4.18178	4.01399	1.97773	2.49894	1.86171
CC2G_005267	2.36874	1.0878	1.61359	4.70349	4.53784	3.35552	7.05262	6.93409	3.90132	5.18509	4.49204	4.32236	4.98435	5.46222	5.16874	4.82059	5.00745	4.79871	4.98454	4.79247	4.90784	4.2021	4.35755	4.19303	2.2782	2.90175	2.47496
CC2G_005268	4.96942	4.63206	5.02395	6.81906	7.00738	6.5033	5.13581	5.09836	6.78259	6.65579	6.74202	6.69829	6.41721	6.32329	6.54461	6.85849	6.74844	6.60944	6.44274	6.45152	6.45466	5.93858	5.97987	5.97387	5.42808	5.74949	5.45814
CC2G_005276	3.3633	2.18183	1.68643	3.46232	5.56568	5.02966	6.06345	6.18279	4.82321	5.04029	5.77642	6.0625	5.34685	4.62675	5.77028	4.65529	4.71047	5.24447	4.85455	5.07546	4.75744	3.44348	3.60009	3.84212	2.08499	1.85989	2.21649
CC2G_005451	4.27562	4.1734	4.16643	2.11792	3.56033	2.49	2.8442	2.40654	4.22337	4.17126	4.55369	4.37547	3.9687	3.90839	4.18793	4.10174	4.24067	4.77837	4.11337	4.41492	4.64769	3.24302	3.25483	3.42841	1.27423	1.21095	1.08035
CC2G_005453	5.87187	5.64963	5.79889	6.902	6.67217	6.34839	6.54772	6.619	7.16575	7.31262	7.65785	7.57883	7.43383	7.13465	7.54356	7.8389	7.73784	7.73803	7.62503	7.82551	7.53927	6.97005	7.08999	7.15022	6.6099	6.8668	6.52971
CC2G_005454	3.45044	3.87449	3.65173	5.72193	5.06137	5.24573	6.38035	6.45726	5.03409	5.11893	5.42155	5.00607	5.77236	5.08465	5.62458	5.55442	5.27695	5.10908	4.59969	4.59375	4.56131	5.13607	5.18988	5.18725	4.87148	5.20581	4.7516
[truncated: 10,666 more rows]
