# Supplementary material for: The Genome-Wide Characterization of Alternative Splicing and RNA Editing in the Development of Coprinopsis cinerea
Source: J Fungi (Basel). 2023 Sep 9;9(9):915. doi: 10.3390/jof9090915 (PMC10532568; doi:10.3390/jof9090915)
Supplement: Supplementary file 1 [file jof-09-00915-s001.zip › DatasetS2_Alternative_splicing.exp5.minor05.jad6.psi.xlsx]

## Sheet: Alternative_splicing.exp5.minor
Location	SplicingType	BS	BS12h	BS24h	Myc	Oidia	Scl	Knot	Pri	YFB
scaffold_1:1002193-1002250	IR	0.836066	1	1	1	1	0.98895	1	0.993464	1
scaffold_1:1005087-1005148	IR	NA	NA	NA	NA	0.880952	0.9375	NA	NA	NA
scaffold_1:1009410-1009742	IR	0.0813953	0.0291262	0.0118012	0.0187135	0.0156379	0.0413625	0.042471	0.027027	0.0260708
scaffold_1:1018250-1018296	IR	0.292857	0.142857	0.0434783	0.0636364	0.116147	0.139423	0.0886525	0.0442708	0.123077
scaffold_1:1019090-1019150	IR	0.54878	1	0.971564	0.876161	0.877598	0.875	0.893564	0.863529	0.839344
scaffold_1:1023263-1023309	A3SS	1	1	1	1	1	1	1	0.920502	1
scaffold_1:1023309-1023370	IR	0.0434783	0.0396825	0.0526316	0.110368	0.0995671	0.0629139	0.0734463	0.087963	0.112069
scaffold_1:1023370-1023374	AltStart	0.931217	0.952756	0.889328	0.914089	0.892704	0.937086	0.911111	0.824268	0.962617
scaffold_1:1025398-1025407	A3SS	0.957082	1	0.935484	0.931818	0.953216	0.958442	0.955787	0.940532	0.941613
scaffold_1:1025398-1025407	A5SS	NA	NA	NA	NA	0.953216	NA	NA	NA	0.941613
scaffold_1:1025398-1025410	A3SS	NA	1	0.90625	0.946154	0.946299	NA	NA	0.94795	0.933824
scaffold_1:1036277-1036335	IR	0	0.0833333	0	0.0192555	0.00970874	0.00247788	0.00402212	0.0115385	0.0078125
scaffold_1:1046902-1046955	IR	0.786765	0.8	0.663507	0.743523	0.755011	0.869048	0.758974	0.640511	0.6
scaffold_1:1051323-1051376	IR	0.977011	NA	NA	0.962025	NA	0.94702	0.976744	0.97479	NA
scaffold_1:1054737-1054778	A3SS	0.0898876	NA	0.0157895	0.0336134	0.0179641	0.0204082	NA	0.026087	NA
scaffold_1:1054794-1054834	A5SS	0.910112	NA	0.984211	0.966387	0.982036	0.979592	NA	0.973913	NA
scaffold_1:1059625-1059675	IR	0.947368	1	1	0.998008	0.998638	0.993232	1	0.999585	0.998388
scaffold_1:1064368-1064378	A3SS	0.285714	0	0	0.012	0.00353357	0.00593472	0	0.00253165	0.00231481
scaffold_1:1064419-1064433	A5SS	0.714286	1	1	0.988	0.996466	0.994065	1	0.997468	0.997685
scaffold_1:1070688-1070773	IR	NA	NA	NA	NA	NA	0.947368	1	NA	NA
scaffold_1:1070714-1070773	IR	NA	NA	NA	0.615385	NA	NA	0.75	NA	NA
scaffold_1:1071257-1071274	A3SS	0.932886	1	1	1	1	1	1	0.996324	0.990196
scaffold_1:1071322-1071331	A5SS	0.0671141	0	0	0	0	0	0	0.00367647	0.00980392
scaffold_1:1079913-1079939	A3SS	1	1	0.933333	0.988679	0.996516	0.993671	0.994819	0.98469	0.997653
scaffold_1:1079973-1079987	A5SS	0	0	0.0666667	0.0113208	0.00348432	0.00632911	0.00518135	0.00811688	0.00156617
scaffold_1:1086320-1086348	A3SS	0.928571	NA	NA	NA	NA	0.945578	NA	NA	0.875
scaffold_1:1087999-1088126	IR	0.919811	0.866667	0.890756	0.912109	0.905908	0.872117	0.889273	0.922644	0.914787
scaffold_1:1097778-1097839	IR	0.0151757	0.0666667	0.0106007	0.0280612	0.0311665	0.0186418	0.0307692	0.014377	0.00921659
scaffold_1:1109655-1109736	IR	0	0.0555556	0.0232558	0.0590164	0.0726496	0.068323	0.100313	0.0301508	0.0408163
scaffold_1:1111594-1111811	A3SS	0	0	0	0	0	0.0132743	0.0160428	0.0719424	0.254545
scaffold_1:1111822-1111868	A5SS	1	1	1	1	1	0.986784	0.983957	0.928058	0.745455
scaffold_1:1134880-1134935	IR	0.262376	0.633333	0.834483	0.815271	0.890547	0.807642	0.8482	0.807619	0.825581
scaffold_1:1135039-1135076	A5SS	NA	NA	NA	NA	0.571429	NA	NA	0.727273	0.333333
scaffold_1:1135039-1135130	IR	NA	0.901961	0.989691	NA	NA	NA	NA	0.995714	NA
scaffold_1:1136495-1136500	A3SS	NA	1	0.962963	0.966387	0.926829	0.957529	0.915493	0.894444	0.930233
scaffold_1:1136509-1136553	A5SS	0.138686	0	0	0.0325203	0.00485437	0.0114068	0.0273973	0.00552486	0.0652174
scaffold_1:1137257-1137309	IR	0.0666667	NA	NA	NA	0.114286	NA	NA	0.0981595	NA
scaffold_1:1150147-1150199	IR	0.893333	NA	NA	0.978814	0.985765	0.977612	0.990476	0.986301	0.979079
scaffold_1:1160190-1160204	A3SS	NA	NA	NA	NA	NA	NA	NA	0.417323	0.592593
scaffold_1:1160245-1160259	A3SS	0.833333	1	0.789474	0.7	0.608108	0.555556	0.5	0.582677	0.407407
scaffold_1:1160245-1160259	A5SS	NA	NA	NA	NA	NA	NA	NA	0.582677	0.407407
scaffold_1:1161166-1161177	A3SS	NA	NA	NA	NA	0.125	0.16	NA	0.375	0.6
scaffold_1:1161166-1161177	A5SS	NA	NA	NA	NA	0.125	0.16	NA	NA	NA
scaffold_1:1161220-1161263	A3SS	NA	NA	NA	NA	0.875	0.84	NA	NA	NA
scaffold_1:1161220-1161263	A5SS	NA	NA	NA	NA	0.875	0.84	NA	0.625	0.4
scaffold_1:1161462-1161503	A3SS	NA	NA	NA	0.10101	NA	NA	NA	NA	0.315789
scaffold_1:1161462-1161503	A5SS	0	0	0	0.10101	0.01	0.107143	0.0833333	0.285714	NA
scaffold_1:1161522-1161552	Cassette	NA	NA	NA	0.9	NA	NA	NA	NA	0.714286
scaffold_1:1161522-1161558	A3SS	1	1	1	0.89899	0.99	0.892857	0.916667	0.714286	NA
scaffold_1:1161522-1161558	A5SS	NA	1	NA	0.89899	NA	NA	NA	NA	NA
scaffold_1:1161558-1161626	A3SS	NA	NA	NA	0.909091	NA	NA	NA	NA	0.75
scaffold_1:1163129-1163162	A3SS	NA	NA	NA	NA	NA	0.0722892	NA	0.0299401	0.0190476
scaffold_1:1163551-1163565	A3SS	1	0.714286	0.818182	0.747331	0.669967	0.733813	0.650407	0.4375	0.173387
scaffold_1:1163551-1163565	A5SS	NA	0.714286	0.818182	NA	NA	0.733813	NA	0.4375	0.173387
scaffold_1:1163843-1163851	A3SS	NA	NA	NA	NA	NA	0.882353	NA	0.949367	0.882353
scaffold_1:1163851-1163902	IR	0.195122	0.818182	0.344828	0.491429	0.629108	0.669811	0.528139	0.733096	0.933628
scaffold_1:1164059-1164084	A3SS	NA	0.714286	0.229508	NA	NA	0.493506	NA	0.62	0.859375
scaffold_1:1164059-1164084	A5SS	0.0677966	0.714286	0.229508	0.308081	0.539535	0.493506	0.396226	0.62	0.859375
scaffold_1:1164125-1164138	A3SS	0.931034	0.285714	0.770492	0.691919	0.460465	0.506494	0.603774	0.38	0.140625
scaffold_1:1164125-1164138	A5SS	NA	0.285714	0.770492	NA	NA	0.506494	NA	0.38	0.140625
scaffold_1:1170585-1170614	A3SS	0.0816327	0	0.016129	0.0333333	0.0349462	0.0241546	0.0426288	0.040884	0.0538922
scaffold_1:1174894-1174913	A3SS	0.555556	0.5	0.0197368	0.0361156	0.0665188	0.0759259	0.0986239	0.852941	0.5625
scaffold_1:1174894-1174913	A5SS	0.555556	0.5	0.0197368	0.0361156	0.0665188	0.0759259	0.0986239	0.852941	0.5625
scaffold_1:1175026-1175037	A3SS	0.833333	0.545455	0.0625	0.0830258	0.131579	0.107937	0.222222	0.964286	0.8
scaffold_1:1175026-1175037	A5SS	0.833333	0.545455	0.0625	0.0830258	0.131579	0.107937	0.222222	0.964286	0.8
scaffold_1:1175116-1175178	IR	1	0.9	0.4375	0.547619	0.8	0.701613	0.708029	1	1
scaffold_1:1185623-1185726	IR	0.928571	1	1	0.966667	0.961905	0.901754	0.990566	0.996875	1
scaffold_1:1191274-1191334	IR	NA	0.222222	0.0269231	0.0230769	0.00452489	0.0150376	0.010274	0.0526316	0.0253165
scaffold_1:1203076-1203135	IR	0.939759	1	NA	NA	NA	1	NA	1	1
scaffold_1:1203130-1203160	A5SS	1	1	0.814815	0.635135	0.626263	0.993056	0.844444	0.963636	1
scaffold_1:1203135-1203160	Cassette	1	NA	0.814815	0.635135	0.632653	NA	0.853933	NA	NA
scaffold_1:1203200-1203212	A3SS	0	0	0.185185	0.364865	0.367347	0.00694444	0.146067	0.0363636	0
scaffold_1:1207511-1207553	A5SS	NA	NA	NA	0.988889	0.992543	0.91018	0.956693	0.8	0.545455
scaffold_1:1207756-1207809	IR	1	1	0.971292	0.981061	0.99169	NA	0.992513	0.869565	NA
scaffold_1:1212018-1212075	IR	0.963855	1	0.994048	0.978933	0.985149	0.983051	0.989813	0.925926	0.85514
scaffold_1:1213109-1213168	A3SS	0.71028	0.714286	0.957627	0.987854	0.982609	0.966981	0.987616	0.994065	1
scaffold_1:1213173-1213223	A5SS	0.28972	0.285714	0.0434783	0.0121457	0.0177515	0.0331754	0.0124611	0.00598802	0
scaffold_1:1213173-1213235	A5SS	NA	NA	0.625	NA	0.461538	NA	NA	NA	NA
scaffold_1:1216350-1216423	IR	0.0526316	0	0.00680272	0.0301887	0.0401338	0.032491	0.04375	0.0232558	0.0246914
scaffold_1:1218196-1218212	A3SS	0	NA	NA	NA	NA	NA	0.916667	NA	NA
scaffold_1:1226216-1226231	A3SS	0.102564	0.160714	0.245399	0.277056	0.263547	0.155963	0.246445	0.332308	0.367171
scaffold_1:1248480-1248548	IR	0.918033	1	0.97561	0.982394	0.974504	0.974138	0.956522	0.936877	0.963855
scaffold_1:1249367-1249426	IR	0.949541	1	0.987578	0.971264	0.981395	0.968051	0.976562	0.958175	NA
scaffold_1:1259575-1259636	IR	0.376623	1	1	0.961905	0.970588	0.945338	0.949807	0.951613	0.955556
scaffold_1:1269783-1269790	A3SS	NA	NA	NA	0.0982143	0.0631579	NA	NA	NA	NA
scaffold_1:1269830-1269867	A5SS	NA	NA	NA	0.943925	0.936842	NA	NA	NA	NA
scaffold_1:1270975-1271030	IR	0.171362	0.125	0.0501792	0.0367647	0.0154867	0.0123967	0.0357143	0.0783582	0.0859729
scaffold_1:1273903-1273961	IR	1	1	1	1	1	1	1	0.997877	0.82
scaffold_1:1273921-1273961	A3SS	NA	NA	NA	NA	NA	1	NA	NA	0
scaffold_1:1282739-1282801	IR	NA	NA	NA	NA	NA	0.785714	NA	NA	0.785714
scaffold_1:1290573-1290582	A3SS	0.925926	NA	NA	0.981693	0.984095	0.974227	0.989975	0.990215	0.967033
scaffold_1:1293223-1293282	IR	0.677885	1	1	0.976471	0.990937	0.990506	0.97479	1	0.998457
scaffold_1:1293710-1293728	A3SS	0.540741	0	0	0.0220588	0.0454545	0.0193548	0.04	0	0.003003
scaffold_1:1295394-1295448	IR	0.25	0.653846	0.597701	0.5625	0.676667	0.639205	0.843049	0.656109	0.7593
scaffold_1:1297352-1297410	IR	NA	0.946667	NA	0.995767	0.995673	0.999016	0.999179	NA	NA
scaffold_1:1309532-1309643	IR	0.176895	0	0.0144928	0.0301508	0.00598802	0.0394089	0.0691824	0.0197368	0.0427046
scaffold_1:1309830-1309858	A5SS	0.922619	1	1	1	1	1	1	1	1
scaffold_1:1309905-1309918	A3SS	0.104046	0	0	0	0	0	0	0	0
scaffold_1:1317450-1317465	Cassette	0.290323	NA	NA	NA	NA	0.036	NA	NA	NA
scaffold_1:1317494-1317541	A5SS	0.888889	NA	NA	NA	NA	0.983673	NA	NA	NA
scaffold_1:1321316-1321367	IR	1	1	1	0.989583	1	0.983051	0.936508	1	0.939394
scaffold_1:132460-132475	A3SS	0.780576	0.550459	0.714286	0.696275	0.664269	0.726328	0.719068	0.375	0.666667
scaffold_1:1327633-1327680	A5SS	1	0.966667	1	0.949219	0.944099	0.99336	0.982517	1	1
scaffold_1:1327691-1327717	Cassette	0	0.0333333	0	0.0898876	0.0952381	0.0131926	0.0393162	0	0
scaffold_1:1330428-1330433	A3SS	0.274725	0.0869565	0.0740741	0.180995	0.111475	0.184739	0.188755	0.169903	0.190476
scaffold_1:1330596-1330601	A3SS	0.791667	1	0.943182	0.93361	0.875	0.932258	0.9125	0.914089	0.86911
scaffold_1:1331286-1331348	IR	0.98773	0.933333	0.97561	0.987421	0.975309	0.977341	0.984962	0.974212	0.949495
scaffold_1:1335879-1335945	IR	0.948755	0.985714	1	1	1	0.995933	0.995351	1	1
scaffold_1:1338849-1338907	IR	0	0.375	0.0595238	0.041543	0.053125	0.0633803	0.0517241	0.0323529	0.0724638
scaffold_1:1339662-1339721	IR	0.0263653	0	0.00651466	0.017316	0.0140625	0.0145631	0.0528541	0.0150862	0.0108992
scaffold_1:1339744-1339801	IR	NA	NA	NA	NA	NA	0.0636183	NA	NA	0.0445434
scaffold_1:1340944-1341169	Cassette_multi	0.913223	NA	NA	NA	NA	NA	NA	NA	1
scaffold_1:1341169-1341182	A5SS	0.0623229	NA	NA	NA	NA	NA	NA	NA	0.0909091
scaffold_1:1341169-1341256	IR	0.650475	1	0.971429	0.990826	0.983333	0.991031	1	0.828571	0.989572
scaffold_1:134232-134297	IR	NA	NA	0.733333	NA	NA	NA	NA	0.714286	NA
scaffold_1:1367543-1367590	A5SS	1	1	0.996795	0.966	0.991279	0.985795	0.94844	1	1
scaffold_1:1367599-1367646	A3SS	0	0	0.00320513	0.034	0.00872093	0.0142045	0.0515604	0	0
scaffold_1:1375941-1375994	IR	0.0327869	0.0384615	0.0520833	0.118519	0.182131	0.0732394	0.0714286	0.129496	0.257576
scaffold_1:1386399-1386451	A3SS	0.988662	1	0.933333	1	1	0.97619	0.94375	0.976048	0.982699
scaffold_1:1389305-1389357	IR	0.181818	0	0	0.00756144	0.0145631	0.013468	0.00171527	0.0298246	0.211538
scaffold_1:1389935-1389945	A5SS	NA	NA	0.971831	0.992806	0.982353	0.984496	0.931298	0.950413	0.987654
scaffold_1:1396420-1396536	IR	0.938053	0.987013	0.977778	0.974937	0.97479	0.963277	1	0.976081	0.944399
scaffold_1:1397345-1397350	A3SS	0.0220588	0.0555556	0	0.0132013	0.0306407	0.0305344	0.0307692	0.0174292	0.00941915
scaffold_1:140590-140598	A3SS	0.925	0.818182	0.985294	0.932515	0.886139	0.858824	0.742857	0.864979	0.787879
scaffold_1:1407073-1407102	A3SS	0.974359	1	0.966667	0.959596	0.912409	0.95	0.912281	0.977654	0.971429
scaffold_1:1407637-1407723	IR	NA	NA	NA	0.984127	0.990099	NA	0.98773	NA	0.938462
scaffold_1:1411188-1411221	AltStart	NA	0.964286	0.869565	NA	0.813559	0.775862	0.852792	0.794118	0.804348
scaffold_1:1411188-1411221	Cassette	0.8	0.964286	0.869565	0.875433	0.816667	0.777397	0.853535	0.794118	0.804348
scaffold_1:1413894-1413905	A3SS	0.895161	1	0.935897	0.890909	0.915179	0.927419	0.87931	0.919753	0.947368
scaffold_1:1416287-1416348	IR	0	0.25	0	0.00215983	0.00371058	0.012605	0.011254	0.00276243	0.025641
scaffold_1:1418586-1418592	A5SS	NA	NA	NA	NA	NA	NA	0	NA	0.0526316
scaffold_1:1418648-1418655	A3SS	NA	NA	NA	NA	NA	NA	1	NA	0.947368
scaffold_1:1424657-1424714	A3SS	0.201681	0.25	0.0288462	0.118598	0.119107	0.141631	0.136095	0.0814815	0.0870044
scaffold_1:1424771-1424832	A5SS	0.436975	0.416667	0.365385	0.415094	0.434243	0.316239	0.447732	0.483951	0.375965
scaffold_1:1426357-1426370	A3SS	0.0469388	0.125	0.0128205	0.0636364	0.0117647	0.0574713	0.0285714	0.0365854	0.0160643
scaffold_1:1433872-1433877	A3SS	0.964286	NA	0.960396	NA	NA	NA	0.938144	0.960784	NA
scaffold_1:1439978-1440002	A3SS	0.121212	0.571429	0.546875	0.585242	0.70354	0.763797	0.503356	0.247967	0.190809
scaffold_1:1447934-1447986	A3SS	0.33913	0.0714286	0.0307692	0.108108	0.0933333	0.277344	0.0632184	0.0789474	0.0833333
scaffold_1:1447934-1447986	A5SS	NA	0.0714286	0.0307692	NA	NA	NA	NA	NA	NA
scaffold_1:1447992-1448046	A3SS	0.66087	0.928571	0.969231	0.891892	0.906667	0.730159	0.942197	0.915789	0.915966
scaffold_1:1447992-1448046	A5SS	0.66087	0.928571	0.969231	0.891892	0.906667	0.730159	0.942197	0.915789	0.915966
scaffold_1:1450767-1450783	A5SS	1	1	0.997118	NA	0.947977	0.995016	NA	1	0.998979
scaffold_1:1450771-1450783	A5SS	1	0.875	1	0.937079	0.942529	0.997858	0.984452	1	0.999591
scaffold_1:1450831-1450838	A3SS	0	0.125	0.00288184	0.132455	0.104369	0.0071048	0.0373433	0	0.00142886
scaffold_1:1453704-1453761	IR	0.344828	0.285714	0.132353	0.0833333	0.1	0.0796703	0.141956	0.0797546	0.0664024
scaffold_1:1455770-1455826	IR	0.327138	0.162162	0.142857	0.0594059	0.05	0.246914	0.0441176	0.0474308	0.0731707
scaffold_1:1455850-1455864	A3SS	0.181034	0	0	0	0	0.027027	0	0	0
scaffold_1:1455850-1455904	IR	NA	0.133333	0.0666667	0.133333	0.148148	0.1	0.105263	0.0471204	0.142857
scaffold_1:1455904-1455915	Cassette	0.9	1	1	1	1	0.980769	1	1	1
scaffold_1:1455922-1455969	A5SS	0.169355	NA	NA	NA	NA	NA	NA	NA	0
scaffold_1:1459926-1459983	IR	0.945205	1	0.994286	0.995665	0.998677	0.995536	0.995665	0.987435	0.991968
scaffold_1:1480440-1480495	IR	0.683594	0.814815	0.919355	0.85567	0.905844	0.865	0.888889	0.918605	0.863636
scaffold_1:1480927-1480975	IR	0.0171544	0.0615385	0	0.00540541	0.00714286	0.0174002	0.0225764	0.0111288	0.0101695
scaffold_1:1488131-1488183	IR	0.929293	NA	NA	NA	NA	NA	NA	0.985591	NA
scaffold_1:1490424-1490429	A5SS	1	0.777778	0.942857	1	0.967105	0.995516	0.978541	0.991597	0.98
scaffold_1:1490983-1491042	A5SS	0.77551	NA	NA	NA	NA	NA	0.993197	NA	NA
scaffold_1:1491098-1491115	A3SS	0.808511	NA	NA	NA	NA	NA	0.993197	NA	NA
scaffold_1:1497400-1497434	A5SS	NA	NA	NA	NA	0.333333	NA	NA	0.846154	NA
scaffold_1:1497400-1497437	A5SS	NA	NA	0.986111	0.98773	0.944056	0.965116	0.964286	NA	0.977273
scaffold_1:1497437-1497492	IR	0.560886	0.590909	0.568389	0.777317	0.836957	0.907572	0.746649	0.765246	0.688857
scaffold_1:1517466-1517537	IR	0.822884	1	0.993827	1	0.994609	1	1	0.995444	0.993506
scaffold_1:1521829-1521899	A3SS	0.884848	1	1	0.99308	0.996795	NA	0.978541	0.974453	1
scaffold_1:1521829-1521899	A5SS	0.884848	1	1	0.99308	0.996795	1	0.978541	0.974453	1
scaffold_1:1521900-1521950	A3SS	0.11976	0	0.00990099	0.0103448	0.00320513	0	0.0214592	0.0290909	0
scaffold_1:1521900-1521950	A5SS	0.11976	0	0.00990099	0.0103448	0.00320513	0	0.0214592	0.0290909	0
scaffold_1:1529776-1529828	IR	0.2	0.2	0.0645161	0.06	0.0531915	0.106918	0.0700637	0.126316	0
scaffold_1:1529793-1529828	A3SS	0.15493	NA	0.0333333	NA	NA	0.0206897	0	0.0568182	0
scaffold_1:1529793-1529828	A5SS	0.15493	0	NA	0	0.0111111	NA	NA	NA	NA
scaffold_1:1533437-1533494	IR	0.118577	0.0645161	0.0769231	0.150794	0.167526	0.183867	0.189693	0.459459	0.5
scaffold_1:1533575-1533624	IR	0.097561	0	0.0909091	0.0862069	0.0543478	0.116364	NA	0.28	0.148148
scaffold_1:1550119-1550205	A3SS	1	0.888889	0.971429	1	1	1	1	1	1
scaffold_1:1550193-1550205	A3SS	0.25	NA	0.170854	0.158273	0.0979381	0.175325	0.211268	0.235294	0.212963
scaffold_1:1554636-1554708	IR	0.375	0.44	0.166667	0.244186	0.234921	0.236842	0.2	0.14539	0.16129
scaffold_1:1554745-1554800	IR	0.507463	0.15	0.142857	0.0594059	0.0389105	NA	NA	NA	NA
scaffold_1:1561930-1561983	IR	0.0357143	0	0	0.0526316	0.047619	0.0833333	0.0731707	0.113122	0.0391304
scaffold_1:156209-156265	IR	0.306843	0.285714	0.180328	0.162162	0.132353	0.400922	0.301887	0.0609244	0.0294118
scaffold_1:1562343-1562407	IR	0.0909091	0.2	0.1875	0.3	0.205128	0.172414	0.19697	0.188776	0.0949657
scaffold_1:156331-156393	A3SS	1	NA	NA	NA	NA	NA	0.945946	NA	NA
scaffold_1:156331-156393	A5SS	1	1	1	0.980488	0.995833	0.98773	0.945946	0.997797	1
scaffold_1:156402-156486	A3SS	0	0	0	0.0195122	0.00414938	0.0122699	0.0538117	0.00219298	0
scaffold_1:156402-156486	A5SS	0	0	0	NA	0.00414938	0.0122699	0.0538117	0.00219298	0
scaffold_1:1564943-1565040	IR	0.907534	1	1	0.952381	0.975	0.948864	0.990099	0.989796	0.977778
scaffold_1:156653-156718	IR	NA	0.2	0.047619	0.121622	0.0689655	0.0535714	0.0963855	0.0114504	0.0295858
scaffold_1:156813-156867	IR	0.00622084	0	0.0645161	0.152542	0.037037	0.0859375	NA	NA	0
scaffold_1:157005-157011	A3SS	NA	NA	NA	NA	NA	0.170732	NA	0.130435	NA
scaffold_1:157005-157036	A3SS	0.375	NA	NA	NA	NA	1	NA	NA	NA
scaffold_1:1570987-1571040	IR	0.0648148	0	0.0372671	0.124444	0.0894309	0.0859107	0.189349	0.122302	0.166667
scaffold_1:1573083-1573163	IR	0.997006	0.974359	0.981308	0.947917	0.987342	0.998185	0.980519	NA	0.931034
scaffold_1:1573234-1573243	A3SS	NA	NA	NA	0.10241	0.0184049	NA	0.0192308	0.0111111	NA
scaffold_1:1573290-1573313	A5SS	1	0.909091	0.971429	0.90303	0.981595	0.996835	0.993506	0.988889	0.928571
scaffold_1:157697-157766	IR	0.869565	NA	NA	NA	NA	0.952381	0.923077	NA	0.714286
scaffold_1:1584296-1584326	A3SS	NA	NA	NA	NA	0.903226	NA	0.815789	NA	NA
scaffold_1:1586525-1586583	IR	0.923077	0.333333	0.0694444	0.0909091	0.118421	0.56338	0.321429	0.191489	0.2
scaffold_1:1587976-1588030	IR	1	NA	NA	NA	NA	NA	NA	NA	0.859155
scaffold_1:1590563-1590571	A3SS	0.971429	NA	0.951807	0.844444	0.964706	0.881657	0.899083	0.897638	0.909091
scaffold_1:1592421-1592475	IR	0.0419847	0.183673	0.0465116	0.0704846	0.047619	0.104895	0.0833333	0.0264151	0.0775194
scaffold_1:1595892-1595938	A3SS	0.967626	0.962963	0.978852	0.97929	0.986607	0.969653	0.977157	0.979167	0.949074
scaffold_1:1595892-1595938	A5SS	0.967626	0.962963	0.978852	NA	0.986607	0.969653	0.977157	0.979167	0.949074
scaffold_1:1597051-1597104	IR	0.950104	0.923077	0.992376	0.987478	0.972561	0.986154	0.980226	0.986456	0.962406
scaffold_1:1622155-1622205	IR	1	1	0.991903	1	1	1	1	0.985972	0.888889
scaffold_1:1633049-1633116	IR	0.240677	0.40396	0.363367	0.528462	0.460563	0.43517	0.552906	0.33908	0.412037
scaffold_1:1640205-1640262	IR	0.0441176	0.0625	0	0.119318	0.0651341	0.0584958	0.0914634	0.0833333	0
scaffold_1:1641762-1641767	A5SS	NA	NA	0.972222	0.88	NA	0.933333	NA	NA	NA
scaffold_1:1641865-1641896	A3SS	NA	NA	NA	NA	0.0810811	0.0958904	NA	NA	NA
scaffold_1:1641865-1641896	A5SS	NA	NA	NA	NA	NA	0.0958904	NA	0.021978	NA
scaffold_1:1641887-1641896	Cassette	0.192982	NA	NA	NA	0.0810811	0.0958904	0.0869565	0.021978	NA
scaffold_1:1641917-1641965	A3SS	0.836364	NA	NA	NA	0.918919	0.90411	NA	0.978022	NA
scaffold_1:1641917-1641965	A5SS	0.836364	NA	NA	NA	0.918919	0.90411	0.933333	NA	NA
scaffold_1:1642115-1642138	A3SS	0.65	NA	NA	0.946237	NA	0.873563	0.914894	NA	NA
scaffold_1:1642115-1642138	A5SS	0.65	0.888889	1	0.946237	0.970803	0.873563	0.914894	0.964029	0.979592
scaffold_1:1642179-1642196	A3SS	0.315789	NA	0	NA	NA	0.05	NA	NA	NA
scaffold_1:1642179-1642196	A5SS	0.315789	0.111111	0	0.032967	0.0291971	0.05	0.0652174	0.0218978	0.0204082
scaffold_1:1642183-1642196	A5SS	NA	NA	NA	0.0222222	NA	0.0843373	NA	NA	NA
scaffold_1:1642228-1642287	IR	0.964187	0.947368	0.981221	0.994528	0.985714	0.982546	0.995068	0.993622	0.994141
scaffold_1:1643162-1643186	A3SS	0.340753	0.324675	0.45	0.401408	0.357456	0.36113	0.293867	0.348337	0.41471
scaffold_1:1643162-1643186	A5SS	NA	NA	NA	NA	0.357456	NA	NA	NA	0.41471
scaffold_1:1651421-1651431	A3SS	0.768	0	0.0124224	0.0122449	0.0213333	0.0125	0.0125786	0.0292208	0.0222222
scaffold_1:1651421-1651473	IR	0.758333	0	0.0185185	0.0241935	0.0613811	0.0418964	0.0499244	0.0354839	0.0833333
scaffold_1:1651431-1651487	IR	0.244094	1	NA	NA	NA	NA	NA	NA	0.983607
scaffold_1:1651473-1651487	A5SS	0.232	1	0.987578	0.987755	0.978667	0.987514	0.988976	0.970779	0.977778
scaffold_1:1651758-1651774	A3SS	0.367347	0	0	0	0.00247525	0.00076864	0.00149031	0	0
scaffold_1:1651808-1651826	A5SS	0.516667	1	1	0.996169	0.997525	0.998466	0.998514	1	1
scaffold_1:1652074-1652348	IR	0.938053	1	1	1	1	0.997974	0.998419	0.998322	1
scaffold_1:1653242-1653303	IR	0.92233	NA	NA	0.96875	NA	0.969072	NA	NA	NA
scaffold_1:1653585-1653641	IR	0.425	0.333333	0.00819672	0.170213	0.218182	0.306667	0.0625	0.692308	0.222222
scaffold_1:1654547-1654630	A3SS	NA	NA	0.714286	NA	1	1	NA	NA	NA
scaffold_1:1654547-1654630	A5SS	NA	NA	0.714286	NA	NA	NA	NA	NA	1
scaffold_1:165916-165923	A5SS	NA	NA	0.285714	0.666667	0.333333	NA	0.384615	NA	NA
scaffold_1:167126-167210	A5SS	NA	0.0193798	0.0199005	0.027882	0.0432344	NA	NA	0	0.0967742
scaffold_1:167186-167210	Cassette	0.00819769	0.0188366	0.0199005	0.027882	0.0434783	0.0319977	0.0421192	0	0.0967742
scaffold_1:167186-167210	MXE	0.870588	1	NA	1	0.994624	0.977492	0.988439	NA	NA
scaffold_1:167459-167478	Cassette	0.00174541	0	0	NA	NA	0.081571	NA	NA	0
scaffold_1:167506-167532	A3SS	NA	0.0127424	0.0107794	0.0144772	0.0161253	0.0182211	0.0166606	0.0512821	0
scaffold_1:167668-167682	Cassette	0.404255	NA	NA	NA	NA	NA	1	NA	NA
scaffold_1:167700-167718	A5SS	0.4375	NA	NA	NA	NA	NA	0	NA	NA
scaffold_1:1681452-1681507	IR	0.928571	1	1	1	0.989474	1	1	0.991494	0.984262
scaffold_1:1682772-1682797	A5SS	NA	NA	NA	NA	NA	NA	0.878788	NA	0.87931
scaffold_1:1689507-1689512	A3SS	0.2	0	0.056338	0.0675676	0.0656934	0.119565	0.282609	0.13964	0.166667
scaffold_1:1691621-1691631	A5SS	NA	NA	NA	0.96	0.966667	NA	0.647059	0.703704	NA
scaffold_1:1704542-1704575	A3SS	0.487465	0.625	0.434783	0.666667	0.655556	0.684766	0.767486	0.698851	0.622857
scaffold_1:1704836-1704847	A3SS	NA	0.888889	0.883929	0.824645	0.848921	0.868167	0.878049	0.810811	0.891089
scaffold_1:1704883-1704941	IR	0.897038	1	1	0.996139	0.998379	0.996892	0.996855	0.996286	0.997685
scaffold_1:1710495-1710555	IR	0.109756	0	0.0409357	0.216667	0.151899	0.205714	0.0666667	0.0672269	0.172414
scaffold_1:1711762-1711820	IR	0.95082	0.909091	0.992157	0.958506	0.98524	0.995935	0.992188	0.987288	0.985294
scaffold_1:1715872-1715922	IR	0.924686	0.963636	0.991507	0.986745	0.99006	0.96793	0.95581	0.916667	0.9625
scaffold_1:1716380-1716391	A3SS	0.99375	0.942857	0.97193	0.949896	0.954969	0.975694	0.976987	0.975	1
scaffold_1:1717385-1717396	A5SS	0.926014	1	0.999474	0.998826	0.998794	0.994604	0.995315	0.999539	1
scaffold_1:1717436-1717448	A3SS	0.0750894	0	0.000525762	0.00117371	0.00120627	0.00599161	0.00468506	0.000460617	0
scaffold_1:1723098-1723147	IR	0.0659574	0.0655738	0.0928571	0.0350877	0.0437637	0.0676779	0.0581583	0.0741758	0.0305732
scaffold_1:1724460-1724523	IR	0.0339506	0.0421053	0.0326797	0.0794798	0.0814917	0.059044	0.132762	0.0683891	0.0230655
scaffold_1:1726361-1726435	A3SS	NA	0.913043	0.947761	0.964286	0.979167	0.964824	NA	0.967213	0.962791
scaffold_1:1737147-1737210	IR	0.732143	1	0.918728	0.928074	0.946844	0.961699	0.92455	0.854617	0.832669
scaffold_1:1740368-1740454	IR	NA	NA	NA	NA	NA	NA	0.964706	0.887324	NA
scaffold_1:1744027-1744087	IR	0.851064	0.0589569	0.0988064	0.771574	0.622271	0.975309	0.994709	0.97786	0.968553
scaffold_1:1744190-1744199	A3SS	0.97619	NA	1	1	1	0.956522	0.666667	1	NA
scaffold_1:1744190-1744199	A5SS	0.97619	NA	NA	NA	NA	0.956522	0.666667	1	1
scaffold_1:1744242-1744255	A3SS	0.0238095	0	0	0	0	0.0434783	0.333333	0	0
scaffold_1:1745789-1745804	A5SS	0.48	NA	NA	NA	NA	0.3	0.5	0.62963	0.625
scaffold_1:1746151-1746222	IR	0.87234	1	0.989101	0.968215	0.988898	0.973297	0.969626	0.890598	0.745614
scaffold_1:1756776-1756781	A5SS	NA	NA	NA	NA	0.927835	NA	NA	0.936842	0.916667
scaffold_1:1760032-1760113	IR	0.643411	0.888889	0.795699	0.7343	0.759657	0.899015	0.912807	0.741379	0.806452
scaffold_1:1760439-1760505	A5SS	0.895833	NA	NA	NA	NA	0.967273	NA	NA	NA
scaffold_1:178266-178303	A5SS	NA	NA	NA	NA	NA	NA	NA	0.150943	0.416667
scaffold_1:1789092-1789097	A5SS	0.945946	1	0.958333	0.993056	NA	NA	NA	NA	NA
scaffold_1:1792058-1792115	IR	0.931772	0.88	0.901961	0.92973	0.964126	0.957647	0.975787	0.932331	0.968037
scaffold_1:1793774-1793833	IR	0.847273	1	1	0.993485	1	0.98125	0.99763	0.996454	1
scaffold_1:1797894-1797948	IR	0.78327	0.891892	0.919192	0.86783	0.899767	0.889776	0.888668	0.892857	0.891391
scaffold_1:1804120-1804160	A3SS	0.00262467	0	0	0.00307692	0	0	0	0.0771513	0.293478
scaffold_1:1804173-1804226	A5SS	0.997375	1	1	0.996923	1	1	1	0.922849	0.706522
scaffold_1:1810025-1810092	IR	0.922078	0.930233	0.981595	0.987755	0.976038	0.96483	0.990991	0.991935	0.986842
scaffold_1:1812096-1812160	IR	0.983621	0.928571	0.987179	0.992736	0.991903	0.991623	0.990453	0.986702	0.993724
scaffold_1:1815887-1815919	A3SS	0.97561	NA	NA	0.977376	0.98524	0.99505	0.944805	0.9869	NA
scaffold_1:1815887-1815919	A5SS	NA	1	0.985507	0.977376	0.98524	NA	0.944805	NA	0.994975
scaffold_1:1819859-1819911	IR	0.097561	0	0	0.151899	0.0277778	0.0769231	0.108974	0.106383	0
scaffold_1:1819933-1819986	IR	NA	0.0833333	NA	NA	NA	NA	NA	NA	0.545455
scaffold_1:1820168-1820191	A3SS	0.056338	NA	NA	0.05	0.037234	NA	NA	NA	NA
scaffold_1:1820496-1820549	IR	0.144737	0.206897	0	0.0151515	0.07	0.0543478	0.106383	0.0677966	0.0833333
scaffold_1:1820826-1820883	IR	0.895833	1	0.857143	0.9	1	0.896552	0.931507	0.961538	0.875
scaffold_1:1833385-1833442	IR	0.808917	0.956522	0.986486	0.912821	0.912727	0.862694	0.903766	0.948718	0.972973
scaffold_1:1841193-1841209	A3SS	1	NA	NA	NA	NA	NA	NA	NA	0.9
scaffold_1:1841209-1841228	A3SS	0.947368	NA	1	0.997001	0.996875	1	0.997656	0.993415	0.994519
scaffold_1:1841271-1841338	A5SS	1	NA	NA	NA	NA	NA	NA	NA	0.9
scaffold_1:1845828-1845866	A3SS	1	0.833333	0.947368	0.924528	0.938776	0.917293	0.873874	0.931429	0.942529
scaffold_1:1845828-1845866	A5SS	1	0.833333	0.947368	0.924528	0.938776	0.917293	0.873874	NA	0.942529
scaffold_1:1857876-1857883	A3SS	0.085	0	0.0461538	0.06621	0.0445736	0.0366492	0.0858209	0.0727969	0.0387597
scaffold_1:1857876-1857883	A5SS	0.085	0	0.0461538	0.06621	0.0445736	NA	NA	0.0727969	0.0387597
scaffold_1:1866242-1866294	IR	0.0418246	0.176991	0.2	0.757576	0.763158	0.84375	0.770492	0.692308	0.75
scaffold_1:1867324-1867365	A5SS	1	0.888889	1	0.99505	0.995455	0.97973	0.977564	0.988201	0.977941
scaffold_1:1868646-1868656	A3SS	0.909091	1	0.981481	0.994444	1	0.996441	NA	1	1
scaffold_1:1868710-1868758	A5SS	0.909091	1	0.981481	0.994382	1	0.992908	NA	1	0.993421
scaffold_1:1881807-1881854	A5SS	0.722222	1	0.964029	0.970492	0.953995	0.975676	0.951456	0.985481	0.991837
scaffold_1:1881863-1881901	Cassette	0.35	0	0.0428571	0.0295082	0.0506024	0.0243243	0.0516129	0.0145191	0.00816327
scaffold_1:1881909-1881962	A3SS	0.866667	1	0.992593	1	0.994949	1	0.99661	1	1
scaffold_1:1894163-1894215	IR	0.00806452	0.0333333	0.0229885	0.0516605	0.0351906	0.0657439	0.0483271	0.046875	0.046875
scaffold_1:1897369-1897426	IR	0.0612245	0.103448	0.0121951	0.0119048	0.0148883	0.012	0.0176471	0.0171674	0.0268657
scaffold_1:1905931-1906011	IR	0.102564	0	0.0340909	0.119718	0.0821256	0.0858586	0.0426829	0.0542169	0.0926641
scaffold_1:1907423-1907485	IR	0.530303	0.842105	0.883117	0.88961	0.899371	0.86	0.868966	0.75	0.748744
scaffold_1:1908108-1908134	A5SS	0.583333	1	0.9375	0.833333	0.794872	0.846154	0.894737	0.659574	0.333333
scaffold_1:1908134-1908197	IR	0.461538	0.222222	0.117647	0.444444	0.395833	0.62069	0.595238	0.586667	0.714286
scaffold_1:1908171-1908197	A3SS	0.461538	0.125	0.117647	0.375	0.275	0.576923	0.451613	0.569444	0.714286
scaffold_1:1915035-1915046	A3SS	0.964286	0.9	NA	NA	1	NA	NA	1	0.980769
scaffold_1:1916435-1916486	A5SS	NA	NA	NA	0.12	0.0740741	NA	0.183673	NA	NA
scaffold_1:1916485-1916486	Cassette	NA	NA	NA	NA	NA	0.0952381	NA	0.121622	NA
scaffold_1:1916485-1916492	A5SS	NA	NA	NA	NA	NA	0.0952381	NA	NA	NA
scaffold_1:1916485-1916501	A3SS	NA	NA	NA	NA	NA	NA	NA	0.4	NA
scaffold_1:1916492-1916501	A5SS	0.818182	NA	NA	0.931818	0.986486	NA	NA	0.878378	0.933333
scaffold_1:1916492-1916536	A5SS	1	NA	NA	0.911111	0.960526	0.863636	0.847826	NA	0.918033
scaffold_1:1916501-1916536	A5SS	NA	NA	NA	NA	NA	NA	0.125	0.75	NA
scaffold_1:1916684-1916697	A5SS	0.935484	NA	NA	1	0.996454	0.976378	NA	0.996491	NA
scaffold_1:1923344-1923355	A3SS	0.0478655	0.0714286	0.0163043	0.0193322	0.0255474	0.0283582	0.0248276	0.0120141	0.0122699
scaffold_1:1923344-1923386	A3SS	1	NA	NA	NA	0.933333	NA	NA	1	NA
scaffold_1:1923694-1923750	IR	0.0689655	0.272727	0.168539	0.109137	NA	0.149177	0.122235	0.0591497	0.0430464
scaffold_1:1925134-1925191	IR	0.788043	0.939394	0.944915	0.661654	0.674487	0.674731	0.774194	0.834731	0.687805
scaffold_1:1928190-1928229	A5SS	0.527273	0.931034	1	0.940171	0.901961	1	0.969136	0.99639	1
scaffold_1:1928247-1928285	A3SS	0.472727	0.0689655	0	0.0598291	0.103896	0	0.0308642	0.00361011	0
scaffold_1:1939447-1939503	IR	0.166667	NA	NA	NA	NA	0.298429	NA	NA	0.183673
scaffold_1:1939614-1939674	IR	0.923497	0.915254	0.980878	0.934993	0.918757	0.909311	0.966793	0.930131	0.917391
scaffold_1:1939674-1939679	A3SS	0.921053	NA	0.931034	0.921569	0.931507	0.892857	0.945946	0.941176	0.957983
scaffold_1:1943145-1943177	A5SS	0.899225	NA	NA	NA	NA	NA	0.994253	NA	NA
scaffold_1:1943219-1943231	A3SS	0.0645161	NA	NA	NA	NA	NA	0.00574713	NA	NA
scaffold_1:1951577-1951634	IR	0.0909091	0.181818	0.05	0.130112	0.106897	0.0339806	0.107595	0.0601719	0.0571429
scaffold_1:1955010-1955061	IR	0.0714286	0.0882353	0.0138889	0.0216718	0.0184659	0.0191388	0.048495	0.0348259	0.0157895
scaffold_1:1957378-1957384	A3SS	0.0144928	0	0.0128205	0.00862069	0.0161725	0.0257611	0.0213777	0.0514706	0.0141844
scaffold_1:1957378-1957384	A5SS	NA	NA	NA	NA	NA	NA	0.0213777	0.0514706	0.0141844
scaffold_1:1957429-1957476	A5SS	0.942857	NA	0.961538	0.991379	0.975741	0.983607	0.988124	0.992647	0.971631
scaffold_1:1959441-1959497	IR	0.904762	0.833333	NA	NA	0.689655	0.62963	0.954545	NA	0.8125
scaffold_1:1960559-1960615	IR	NA	NA	NA	0.2	0.217822	NA	0.32574	NA	0.287805
scaffold_1:1960560-1960622	A3SS	NA	NA	NA	NA	0.5	NA	0.5	NA	NA
scaffold_1:1961256-1961305	A5SS	NA	NA	NA	0.0682927	0.0723404	NA	NA	NA	0.0693069
scaffold_1:1963126-1963178	IR	0.0840979	0.666667	0.900433	0.308824	0.144737	0.717703	0.417219	0.671815	0.627451
scaffold_1:1966602-1966613	A3SS	0.888889	NA	NA	0.980769	0.967347	0.95045	0.955665	0.995134	0.981818
scaffold_1:1966602-1966613	A5SS	0.888889	1	0.982456	0.980769	0.967347	0.95045	0.955665	0.995134	0.981818
scaffold_1:196876-196960	IR	0.980952	NA	NA	0.97561	1	0.987342	0.991266	1	0.9375
scaffold_1:1970632-1970687	IR	0.725926	0.55814	0.478261	0.549153	0.481595	0.5	0.610811	0.668687	0.641138
scaffold_1:1973450-1973508	IR	0.545	0.5	0.326087	0.4	0.464865	0.324455	0.507177	0.475309	0.528249
scaffold_1:1975525-1975580	IR	0.0467836	0.105263	0.0526316	0.0833333	0.037594	0.0503597	0.141956	0.0606061	0.0487805
scaffold_1:1976884-1976943	IR	0.151515	0	0.0188679	0.0277778	0.047619	0.0578358	0.0501193	0.0506329	0.0404858
scaffold_1:1980227-1980445	IR	0.606061	0.318182	0.0641711	0.293269	0.231061	0.240838	0.413043	0.325723	0.183824
scaffold_1:1980976-1981021	A3SS	0.902174	0.8	0.767442	0.859259	0.842236	0.797436	0.881818	0.874945	0.898477
scaffold_1:1981626-1981679	IR	0.233533	0.173913	0.0618557	0.0979381	0.106383	0.0615385	0.18797	0.163306	0.164948
scaffold_1:1997657-1997662	A3SS	NA	0.857143	0.962963	NA	NA	NA	0.97549	NA	NA
scaffold_1:1997657-1997662	A5SS	0.950704	0.857143	0.962963	0.957265	0.992481	0.98827	0.97549	0.990291	1
scaffold_1:1998872-1998921	IR	0.985185	0.982143	0.988571	0.979094	0.96861	0.990182	0.992982	0.939024	0.775148
scaffold_1:2001084-2001115	A3SS	0.92437	0.928571	0.985782	0.930556	0.958647	0.977011	0.97166	0.961336	0.923077
scaffold_1:2001145-2001170	A5SS	0.0756303	0.0714286	0.0141509	0.056338	0.0340909	0.017341	0.0283401	0.0352734	0.0718232
scaffold_1:2002164-2002222	IR	0	0.217391	0.0310881	0.025641	0.0291595	0.0440098	0.0310421	0.0348259	0.0583333
scaffold_1:2003380-2003442	IR	0.921569	1	1	0.996825	0.99435	0.988959	0.987526	0.993243	1
scaffold_1:2003871-2003929	IR	0.906433	1	1	NA	NA	NA	NA	NA	1
scaffold_1:2004266-2004319	IR	0.939828	1	0.943182	0.943452	0.94	0.926214	0.961656	0.869198	0.922414
scaffold_1:2006385-2006391	A3SS	0.244444	0.333333	0.166667	0.111765	0.185185	0.158333	0.179245	0.318043	0.311224
scaffold_1:2006385-2006391	A5SS	0.244444	0.333333	0.166667	0.111765	0.185185	0.158333	0.179245	NA	0.311224
scaffold_1:2010297-2010354	IR	0	0.0588235	0	0.00854701	0	0.029703	0	0	0.0074664
scaffold_1:2011853-2011913	IR	0.138528	0.228571	0.12381	0.096	0.121495	0.0747664	0.1	0.0987654	0.0343152
scaffold_1:2014823-2014857	A3SS	0.0314961	0.148148	0	0.122449	0.0676692	0.136646	0.276923	0.0547945	0.185053
scaffold_1:2014823-2014857	A5SS	0.0314961	0.148148	0	0.122449	0.0676692	0.136646	0.276923	0.0547945	0.185053
scaffold_1:2015586-2015596	A3SS	0.242424	NA	0.230769	0.736842	0.8	0.428571	0.461538	1	NA
scaffold_1:2025215-2025276	IR	0.0448718	0.0740741	0.0128535	0.019088	0.0171123	0.00731261	0.0243161	0.00833333	0.00847458
scaffold_1:2030159-2030223	IR	0.909091	1	0.970588	0.996078	0.996805	0.977987	0.996063	0.95858	1
scaffold_1:2035892-2035950	IR	0.244444	0.153846	0.0528634	0.0143266	0.012	0.0389344	0.0521327	0.0332986	0.0157195
scaffold_1:2036080-2036137	IR	0.198276	0	0.0396341	0.00593632	0.0119904	0.0242537	0.0248756	0.0171278	0.00448096
scaffold_1:2036304-2036320	A3SS	0.945946	NA	NA	NA	NA	NA	NA	0.994931	NA
scaffold_1:2036359-2036384	A5SS	0.0526316	NA	NA	NA	NA	NA	NA	0.00507246	NA
scaffold_1:2041377-2041431	IR	0.0925926	0	0	0	0.0162338	0.0127389	0.0205479	0.011236	0
scaffold_1:2041682-2041729	A3SS	NA	0.133333	0	0.0100503	0.00469484	NA	NA	NA	NA
scaffold_1:2041835-2041885	IR	NA	0.733333	0.119266	0.340996	0.271242	NA	NA	NA	NA
scaffold_1:2042026-2042049	A3SS	NA	0.6	0.956522	0.976119	0.990025	NA	NA	NA	NA
scaffold_1:2042026-2042049	A5SS	NA	0.6	0.956522	0.976119	NA	NA	NA	NA	NA
scaffold_1:2042093-2042102	A5SS	NA	0.444444	NA	0.0238806	0.00997506	NA	NA	NA	NA
scaffold_1:2042102-2042120	A5SS	0.967213	0.833333	0.988636	1	1	1	0.994382	0.996094	0.988506
scaffold_1:2052207-2052244	A5SS	0.0413223	0.1	0.0212766	0.0127389	0.0366972	0.0301508	0.0372093	0.00447427	0
scaffold_1:2052263-2052299	A3SS	0.958678	0.9	0.978723	0.987302	0.963303	0.969849	0.962791	0.995526	NA
scaffold_1:2061869-2061916	IR	NA	0	0.0847458	0	0.00869565	0.0143791	0	0	0.0434783
scaffold_1:2062017-2062023	A3SS	0.331461	0.371429	0.365854	0.452174	0.464286	0.442623	0.393075	0.393162	0.444444
scaffold_1:2063923-2063974	IR	NA	0.181818	0.135135	0.16092	0.117302	0.134405	0.175141	NA	0.0810811
scaffold_1:2087091-2087171	AltStart	NA	NA	NA	NA	NA	NA	NA	1	0.9
scaffold_1:2087171-2087239	IR	1	NA	1	0.862069	0.929577	NA	0.901961	0.913907	NA
scaffold_1:2087901-2087907	A3SS	NA	1	0.923077	0.98	0.970297	0.955752	0.918919	0.903226	0.966667
scaffold_1:2087901-2087907	A5SS	NA	1	NA	0.98	NA	0.955752	0.918919	0.903226	NA
scaffold_1:2106336-2106382	IR	0.268908	NA	NA	0.034188	NA	NA	NA	NA	NA
scaffold_1:2106674-2106685	A5SS	NA	NA	NA	NA	NA	NA	0.290323	0.3	NA
scaffold_1:2106674-2106688	Cassette	0.0373563	0.0127389	0.0195258	0.0401396	0.0182186	0.0262258	0.0639535	0.0233546	0.101594
scaffold_1:2106685-2106688	Cassette	0.0261628	0.0127389	0.0195258	0.0265487	0.0162272	0.0262258	0.0492126	0.0191898	0.0604167
scaffold_1:2106688-2106748	IR	1	NA	NA	0.934783	NA	NA	NA	NA	NA
scaffold_1:2107966-2107989	A3SS	0.222222	0	0.089172	0.150485	0.148148	0.121212	0.14433	0.1875	0.28
scaffold_1:2114981-2115028	A5SS	1	1	1	0.992806	0.978836	0.994286	1	0.943005	0.972222
scaffold_1:2114991-2115028	Cassette	1	NA	NA	NA	NA	NA	NA	0.941176	NA
scaffold_1:2115037-2115097	A3SS	NA	0	NA	NA	NA	NA	NA	0.0588235	NA
scaffold_1:2115860-2115881	Cassette	0.0661376	0	0	0.016	0.0191693	0	0	0.00967742	0.0253165
scaffold_1:2115891-2115938	A3SS	0.941333	1	1	0.984	0.980831	1	1	0.990323	0.974684
scaffold_1:2118981-2118992	A3SS	0.109589	0	0	0.00197239	0	0	0	NA	0
scaffold_1:2118981-2118992	A5SS	0.109589	NA	NA	NA	NA	NA	NA	0	NA
scaffold_1:2119033-2119056	A5SS	0.92891	1	NA	NA	NA	1	NA	1	1
scaffold_1:2119430-2119439	A3SS	0.64	1	0.833333	0.705882	0.673077	0.741071	0.546392	0.652174	0.583333
scaffold_1:2119430-2119439	A5SS	NA	NA	NA	NA	NA	0.741071	0.546392	0.652174	0.583333
scaffold_1:2119439-2119487	IR	0.869919	0.857143	0.949495	0.879195	0.8017	0.78934	0.879545	0.898649	0.891473
scaffold_1:2120000-2120056	IR	0.529412	0.142857	0.0769231	0.135593	0.304348	0.305785	0.101523	0.341463	0.152778
scaffold_1:2128382-2128438	IR	0.230769	0	0.0384615	0.0630631	0.040404	0.0569106	0.028169	0.00515464	0.256757
scaffold_1:2131038-2131048	A3SS	0.977778	1	0.966102	0.943396	0.921788	0.9	0.826316	NA	0.880435
scaffold_1:2131038-2131054	A3SS	1	1	1	0.986842	0.988024	0.990431	0.969136	0.928571	0.97006
scaffold_1:2131147-2131196	IR	0.294872	0.210526	0.108108	0.0467836	0.0290698	0.0595745	0.0208333	0.0344828	0.0854271
scaffold_1:2132675-2132713	Cassette	0.988662	1	0.967213	0.939716	0.947242	0.922689	0.890071	0.980952	0.966942
scaffold_1:2133394-2133458	IR	0.151335	0.708333	0.432432	0.269531	0.277064	0.454545	0.133981	0.0733945	0.0662824
scaffold_1:2134899-2134923	A3SS	0.97048	0.842105	0.756906	0.686347	0.60686	0.742481	0.862191	0.879808	0.824427
scaffold_1:2137112-2137172	IR	0.725849	0.52381	0.65971	0.571333	0.560038	0.522699	0.575377	0.497978	0.540925
scaffold_1:2142601-2142606	A3SS	0.970027	1	0.97619	0.915789	0.953623	0.951613	0.963455	0.942559	0.942446
scaffold_1:2142721-2142773	A5SS	0.996979	1	1	0.986395	0.994695	1	0.996942	0.969121	0.922118
scaffold_1:2142784-2142802	Cassette	0.00302115	0	0	0.0169492	0.00530504	0	0.0030581	0.0422535	0.0835913
scaffold_1:2143416-2143477	IR	0.976253	0.862069	0.938567	0.960317	0.97619	0.998795	0.984431	0.968897	0.983666
scaffold_1:2143600-2143625	A5SS	NA	0.172414	0.0454545	NA	NA	NA	NA	NA	NA
scaffold_1:2143656-2143684	A3SS	0.989873	0.8	0.949153	NA	NA	NA	NA	NA	NA
scaffold_1:2151403-2151483	AltEnd	NA	NA	NA	0.909548	NA	NA	0.985591	NA	NA
scaffold_1:2153314-2153332	A3SS	NA	NA	NA	NA	0.794118	NA	NA	NA	0.428571
scaffold_1:2155318-2155325	A3SS	0.00917431	0	0.0377358	0.0243902	0.0230769	0.0203046	0.0892857	0.048951	0.0474453
scaffold_1:2155799-2155867	IR	0.140625	0.104167	0.0811808	0.138462	0.144531	0.216749	0.209877	0.173077	0.111111
scaffold_1:2155863-2155903	A3SS	0.341463	NA	1	NA	NA	NA	NA	NA	NA
scaffold_1:2159551-2159573	A5SS	NA	NA	0.625	NA	NA	1	NA	NA	NA
scaffold_1:2160608-2160659	IR	0.00166945	0.0384615	0.0143541	0	0	0.00677201	0.0283401	0	0.175
scaffold_1:2160871-2161002	IR	0.077551	0.0707071	0.0366972	0.073132	0.0406977	0.0703125	0.0788863	0.0570571	0.135279
scaffold_1:2162454-2162505	IR	0.00277008	0	0.0397727	0.0616438	0.0588235	0.0180412	0.0945946	0.0180723	0.0992366
scaffold_1:2180249-2180308	IR	0.0306748	0	0.0972222	0.0714286	0.0942623	0.092437	0.062753	0.0912863	0
scaffold_1:2183152-2183163	A3SS	NA	NA	NA	0.615385	NA	0.666667	NA	NA	NA
scaffold_1:2183154-2183163	A3SS	NA	NA	NA	0.5	NA	0.857143	0.590909	0.25	NA
scaffold_1:2183154-2183174	A3SS	NA	NA	NA	0.333333	NA	NA	0.4	NA	NA
scaffold_1:2183197-2183211	Cassette	NA	NA	NA	0.194444	NA	0.225166	0.139241	NA	NA
scaffold_1:218646-218651	A3SS	1	0.923077	1	0.994865	NA	NA	NA	NA	0.992908
scaffold_1:219218-219288	IR	0.636364	0.5	0.209302	0.265664	0.256289	0.213967	0.318078	0.595506	0.594378
scaffold_1:2210905-2210962	IR	NA	NA	NA	NA	NA	0	NA	NA	0.315789
scaffold_1:2211054-2211110	IR	0	0	0.0655738	0.030303	0.0555556	0	0.108108	0.0576923	0.133333
scaffold_1:2215187-2215247	A5SS	NA	NA	1	NA	NA	NA	0	NA	NA
scaffold_1:2218576-2218631	IR	0.814433	1	1	1	0.989848	0.991228	1	0.997835	1
scaffold_1:2227504-2227561	A3SS	NA	NA	NA	0.975	0.986842	0.933824	0.967442	0.987903	0.885246
scaffold_1:2227562-2227579	Cassette	NA	NA	NA	0.0429448	0.0217391	0.0592593	0.0588235	0.0160643	0.15625
scaffold_1:2227618-2227645	A5SS	NA	NA	NA	0.981595	0.991342	0.984962	0.972973	0.996032	0.947368
scaffold_1:2228278-2228286	A3SS	0.115385	NA	0.0434783	0.057971	0.0729927	0.0705882	0.0769231	0.10241	0.135135
scaffold_1:2232033-2232041	A3SS	0.372093	NA	NA	NA	NA	NA	NA	0.571429	0.45614
scaffold_1:2251818-2251873	IR	0.016129	0	0	0.0284091	0.0582524	0.0102041	0.0240964	0.0361635	0.0710059
scaffold_1:2252193-2252227	A3SS	1	0.9	0.966667	0.992806	0.957055	0.97931	0.937888	0.983539	1
scaffold_1:2252227-2252282	IR	0.0470588	0.181818	0	0	0	0.0340136	0.00657895	NA	NA
scaffold_1:2252719-2252781	IR	1	1	0.984375	0.996	1	1	1	0.976546	0.813765
scaffold_1:2252870-2252884	A3SS	NA	NA	0	NA	NA	NA	NA	NA	0.162791
scaffold_1:2252870-2252884	A5SS	0	0	0	0.00719424	0	0.00877193	0	NA	0.162791
scaffold_1:2252922-2252940	A5SS	1	1	1	0.992806	1	0.991071	1	0.984772	0.857143
scaffold_1:2259807-2259856	IR	0.0365854	0.05	0.0576923	0.0944625	0.0489914	0.0574913	0.0903427	0.0787879	0.0111111
scaffold_1:2260025-2260083	IR	0.0116959	0	0.00694444	0.0170132	0.0300752	0.0329815	0.0651341	0.0168421	0.05625
scaffold_1:2267876-2267931	IR	0.984962	1	0.944099	0.99308	0.989362	0.992519	0.975904	0.929825	1
scaffold_1:2268579-2268640	IR	0.0714286	0.204545	0.0983146	0.142019	0.13342	0.172749	0.115646	0.111392	0.0588235
scaffold_1:2270519-2270557	A3SS	0.0176991	0	0.054878	0.0947368	0.071066	0.0454545	0.11254	0.0791667	0.107981
scaffold_1:2273609-2273664	IR	0.867841	1	0.953488	0.95098	0.938525	0.93295	0.939024	0.932927	0.94822
scaffold_1:2279242-2279301	A5SS	NA	0	0.0833333	NA	NA	NA	0.00958466	0.00110497	NA
scaffold_1:2286401-2286451	IR	0.0581395	NA	0.0177305	0.0128023	0.0113086	NA	0.033123	0.0060024	0.0188679
scaffold_1:2286495-2286547	IR	0.0555556	0.103448	0.0263158	0.0218978	0.0091047	0.0127389	0.00906344	0.00768246	0.0508475
scaffold_1:2295461-2295472	A3SS	0.126437	0.12	0.0416667	0.090625	0.0771513	0.0490196	0.0529248	0.0403587	0.0224215
scaffold_1:2295461-2295472	A5SS	NA	NA	NA	0.090625	NA	0.0490196	0.0529248	NA	NA
scaffold_1:2297274-2297285	A3SS	0.115183	0.0909091	0.110048	0.305344	0.228395	0.247191	0.22973	0.173913	0.241117
scaffold_1:2297274-2297285	A5SS	NA	NA	NA	NA	NA	0.247191	0.22973	0.173913	0.241117
scaffold_1:2298314-2298389	A5SS	NA	0.3	0.23913	0.550562	0.566929	NA	NA	0.560345	0.505376
scaffold_1:2299862-2299873	A3SS	0.483146	0.117647	0.0111111	0.0225564	0	0.0289855	0.00970874	0.033557	0.0606061
scaffold_1:2299862-2299873	A5SS	0.483146	NA	NA	NA	NA	0.0289855	NA	0.033557	NA
scaffold_1:2299907-2299930	Cassette	0.727612	NA	NA	NA	NA	NA	NA	0.983108	NA
scaffold_1:2299911-2299923	A3SS	0.873786	NA	NA	NA	NA	0.985075	NA	NA	NA
scaffold_1:2299911-2299930	Cassette	0.725564	1	0.99435	0.996047	1	0.992701	0.995025	0.983108	0.983871
scaffold_1:2299939-2299991	A3SS	0.447853	NA	NA	NA	NA	NA	NA	0.0328947	NA
scaffold_1:2299939-2299991	A5SS	0.447853	0	0.0113636	0.00819672	0	0.0142857	0.010101	0.0328947	0.0333333
scaffold_1:2300903-2300908	A3SS	0.452381	0.6	0.0298507	0.378205	0.246914	0.180556	0.323529	0.392157	0.333333
scaffold_1:2306208-2306214	A3SS	0.479167	0.0588235	0.257895	0.245223	0.270408	0.229474	0.236111	0.228938	0.221053
scaffold_1:2317550-2317612	IR	0.473684	0.833333	0.717391	0.721649	0.761468	0.781818	0.821918	0.761905	1
scaffold_1:2322781-2322840	IR	0.911111	NA	NA	0.988701	NA	NA	NA	NA	NA
scaffold_1:2327117-2327176	IR	0.0770677	0.034188	0.0169591	NA	NA	0.0394402	NA	NA	0.0360656
scaffold_1:2331618-2331623	A3SS	0.965517	0.909091	0.941176	0.964103	0.936782	0.935065	0.91195	0.865014	0.915567
scaffold_1:2331867-2331892	A3SS	0.935484	1	1	0.98	0.994595	1	0.988439	0.978142	0.960526
scaffold_1:2335265-2335299	A3SS	1	NA	NA	NA	NA	NA	NA	0	NA
scaffold_1:2335265-2335307	A3SS	NA	NA	NA	NA	NA	0.705882	NA	0.125	0.333333
scaffold_1:2335330-2335361	A5SS	0	NA	NA	NA	NA	0.277778	NA	0.875	0.666667
scaffold_1:2335717-2335778	IR	0.878049	NA	NA	0.972222	0.979167	0.975	NA	0.9986	0.997564
scaffold_1:2337193-2337244	IR	0.0194932	0	0.039604	0.0526316	0.0733945	0.0736842	0.148936	0.0520833	0
scaffold_1:2340235-2340250	A5SS	0.7	1	0.994792	0.98827	0.989011	1	1	0.964072	1
scaffold_1:2340291-2340306	A3SS	0.3	0	0.00520833	0.0117302	0.0110375	0	0	0.0359281	0
scaffold_1:2341730-2341812	A3SS	NA	NA	NA	0.027027	0.025974	0.0818182	NA	NA	0.0384615
scaffold_1:2341730-2341928	A3SS	NA	NA	NA	NA	NA	0.692308	0.272727	NA	NA
scaffold_1:2341812-2341821	Cassette	0.98913	1	1	0.948052	0.974026	0.961905	0.851852	0.775281	0.925926
scaffold_1:2341812-2341928	A3SS	0.989011	1	1	0.947368	0.974026	0.961905	0.851852	0.770115	0.925926
scaffold_1:2352015-2352084	IR	0.110448	0.0597015	0.115519	0.161049	0.162887	0.154472	0.229752	0.3	0.251656
scaffold_1:2359201-2359212	A3SS	0	0	0.00329625	0.0130548	0.0223124	0.0125	0.0160643	0.102564	0.00534759
scaffold_1:2375136-2375142	A3SS	NA	NA	NA	0.0184049	0.0597015	0.0298507	NA	0.0229885	NA
scaffold_1:2375136-2375142	A5SS	NA	NA	0.0266667	0.0184049	0.0597015	NA	0.0192308	0.0229885	NA
scaffold_1:2375186-2375198	A5SS	NA	NA	NA	NA	0.942446	0.970803	NA	NA	NA
scaffold_1:2377018-2377070	IR	0.804878	0.0625	0.392442	0.17094	0.264793	0.455118	0.32853	0.248042	0.0487805
scaffold_1:2377249-2377254	A3SS	NA	NA	0.029703	0.0520833	0.0535714	NA	0.0482759	0.0252101	NA
scaffold_1:2377249-2377254	A5SS	0.0243902	NA	0.029703	0.0520833	0.0535714	NA	0.0482759	0.0252101	NA
scaffold_1:2377298-2377314	A3SS	0.0487805	0	0.0328947	0.03125	0.113095	0.044	0.0137931	0.0420168	0.148148
scaffold_1:2377298-2377314	A5SS	0.0487805	0	0.0328947	0.03125	0.113095	NA	0.0137931	0.0420168	0.148148
scaffold_1:2384993-2385013	A5SS	NA	NA	NA	NA	NA	NA	NA	0.915663	0.943396
scaffold_1:2388275-2388333	IR	0	0.0338983	0.0714286	0.0498534	0.0702576	0.0661896	0.0597484	0.0852273	0.0294118
scaffold_1:2390161-2390224	IR	0.25	0	0.0338983	0.0798319	0.0361446	0.0735294	0.103053	0.031746	0.0810811
scaffold_1:2390318-2390371	IR	0.166667	0	0.0273973	0.0161943	0.00958466	NA	0.0514706	0.0305344	0.137255
scaffold_1:2391837-2391893	IR	1	0.891304	0.979167	0.996707	0.991143	0.996201	1	0.995396	0.996728
scaffold_1:2398668-2398696	A3SS	NA	1	0.953846	0.963918	0.953307	0.950769	0.967136	0.965347	0.916667
scaffold_1:2399365-2399423	IR	0.875181	0.972973	0.978495	0.990506	0.988636	0.953731	0.994302	0.988338	0.982143
scaffold_1:2400205-2400260	IR	0	0.102564	0.00970874	0.0131579	0.0202664	0.0133488	0.016	0.0122699	0.0294118
scaffold_1:2403367-2403380	A5SS	0.848485	0.989362	1	0.99513	0.997379	1	0.998689	0.957958	0.981308
scaffold_1:2403621-2403710	IR	0.75	NA	NA	NA	NA	0.999272	NA	0.983133	NA
scaffold_1:2420740-2420849	IR	0.040146	0.0784314	0.00220264	0.0108401	0.0154525	0.0625	0.113744	0.0530726	0.149153
scaffold_1:2421204-2421217	A5SS	NA	NA	NA	NA	0.5	NA	NA	0.2	0.116667
scaffold_1:2421217-2421233	A5SS	NA	NA	NA	NA	NA	NA	0.903846	NA	0.913793
scaffold_1:242290-242361	IR	0.936685	0.975309	0.956349	0.956914	0.960034	0.938114	0.932322	0.952748	0.912837
scaffold_1:2428683-2428701	A5SS	NA	NA	0.133333	NA	0.210526	NA	NA	NA	NA
scaffold_1:2428683-2428743	IR	0.863229	1	0.972917	0.938412	0.922414	0.957041	0.862745	0.874016	0.564103
scaffold_1:2428743-2428766	A3SS	NA	NA	0.875	NA	0.793103	NA	NA	NA	NA
scaffold_1:2429781-2429846	IR	NA	NA	NA	0.823529	0.857143	NA	NA	NA	NA
scaffold_1:2430401-2430449	A3SS	0.222222	0.0588235	0.0097561	0.0296496	0.0174863	0.023913	0.0229133	0.0173745	0.0114943
scaffold_1:2432687-2432761	A3SS	NA	NA	NA	NA	NA	1	NA	NA	0.909091
scaffold_1:2432795-2432840	A3SS	NA	NA	NA	NA	0	NA	0.0666667	NA	0
scaffold_1:2432816-2432854	MXE	NA	NA	0.538462	NA	NA	0	NA	NA	NA
scaffold_1:2432850-2432854	Cassette	NA	NA	NA	NA	0.984127	0.717949	NA	NA	NA
scaffold_1:2432850-2432854	Cassette_multi	NA	NA	NA	NA	0.525424	NA	NA	NA	0.555556
scaffold_1:2432854-2432903	A3SS	NA	NA	NA	0.173913	NA	NA	NA	NA	0.952381
scaffold_1:2432855-2432908	Cassette	NA	NA	NA	NA	0.986301	0.813559	0.862745	NA	NA
scaffold_1:2432855-2432908	MXE	NA	NA	0.375	NA	0.640845	NA	1	NA	NA
scaffold_1:2432903-2432908	A3SS	NA	NA	NA	0.866667	0.5	NA	0.97561	NA	NA
scaffold_1:2432904-2432908	MXE	NA	NA	0	1	NA	0	NA	0	NA
scaffold_1:2443514-2443579	A5SS	0.847222	1	0.990476	0.982906	0.993151	0.964789	1	1	1
scaffold_1:2444697-2444713	A5SS	0.3	NA	NA	NA	NA	0	NA	NA	NA
scaffold_1:2447565-2447577	A3SS	0.909091	1	0.98005	0.957692	0.972892	0.917582	0.869888	0.933333	0.927273
scaffold_1:2447621-2447631	A3SS	0.0962567	0	0.0199501	0.0423077	0.0271903	0.0828729	0.132353	0.0666667	0.0727273
scaffold_1:2447621-2447631	A5SS	0.0962567	NA	NA	NA	0.0271903	NA	NA	NA	NA
scaffold_1:2447873-2447926	IR	0.260563	0.0243902	0.0833333	0.147186	0.216393	0.207317	0.392097	0.121107	0.141304
scaffold_1:2447951-2448007	A5SS	0.967033	1	0.987342	0.990338	0.972093	0.981818	0.948357	0.990826	1
scaffold_1:2448025-2448059	A5SS	0.0434783	0	0.0310559	0.028436	0.0542986	0.04	0.133047	0.0226244	0.0344828
scaffold_1:2453270-2453288	A3SS	0.198347	0	0	0.0105634	0.127371	0.0846995	0.087146	0.0606061	0.122302
scaffold_1:2453270-2453288	A5SS	0.198347	0	0	0.0105634	0.127371	0.0846995	NA	NA	0.122302
scaffold_1:2455993-2456015	A5SS	0	NA	NA	NA	NA	NA	0.0926518	NA	NA
scaffold_1:2466616-2466628	A3SS	0.928854	0.814815	0.87013	0.95509	0.950495	0.832353	0.974093	0.989474	1
scaffold_1:2466628-2466684	IR	0.0926641	0.0638298	0.0694444	0.0505952	0.1	0.0870968	0.06	0.0693069	0.0717489
scaffold_1:2467517-2467534	A3SS	0.36	0.0196078	0.000918274	0.00253485	0.00219298	0.0069735	0.0104322	0.00521739	0.019802
scaffold_1:2467572-2467601	A5SS	0.666667	0.980392	1	0.998731	0.997807	0.993026	0.989568	0.996516	0.980198
scaffold_1:2467885-2467955	IR	0.816901	0.970588	1	0.988914	0.998267	0.995696	1	0.994152	0.945205
scaffold_1:2473707-2473715	A3SS	0.936709	0.982456	0.97551	0.980282	0.976893	0.97663	0.985816	0.992436	0.971714
scaffold_1:2479344-2479406	IR	0.470588	1	1	1	1	1	0.994186	0.982036	0.72973
scaffold_1:2480542-2480628	IR	0.89899	1	1	1	1	1	1	1	0.992157
scaffold_1:2490334-2490362	A3SS	0.74	1	0.834586	0.806452	0.722892	0.692308	0.70229	0.781022	0.711111
scaffold_1:2492449-2492454	A5SS	0.979452	NA	NA	0.970339	NA	0.944444	0.976	0.953975	0.960784
scaffold_1:2494681-2494708	A3SS	0.0909091	NA	NA	NA	NA	NA	0.8	NA	NA
scaffold_1:2494713-2494724	A5SS	0.999237	1	1	1	1	1	1	0.993724	0.910781
scaffold_1:2494785-2494812	A3SS	0.999237	1	1	1	1	1	1	0.993724	0.910781
scaffold_1:2495336-2495343	A3SS	0.116049	0	0	0.0530973	0.0308642	0.0165975	0.0533333	0.152542	0.0862069
scaffold_1:2497113-2497118	MXE	0.956522	NA	1	0.993567	0.994128	0.991507	0.981853	0.988055	0.921053
scaffold_1:2497118-2497125	A5SS	NA	0	0.0178971	0.0113798	0.0108514	0.00426439	NA	0.039801	0.102564
scaffold_1:2497386-2497447	IR	0.154867	0.162791	0.24569	0.254885	0.287345	0.203108	0.304153	0.178445	0.117117
scaffold_1:2498154-2498214	IR	NA	NA	NA	0.0118343	NA	NA	0.0857143	NA	0.0470588
scaffold_1:2506376-2506422	A3SS	NA	NA	NA	NA	NA	0.0631579	0.0532544	0.0545455	0.0595238
scaffold_1:2506376-2506422	A5SS	0.016	0	0.0142857	0.019802	0.0384615	0.0631579	0.0532544	0.0545455	0.0595238
scaffold_1:2515662-2515722	A3SS	0.0238928	0.0136986	0.0633152	0.0460905	0.052417	0.044164	0.0676471	0.0224138	0.0143885
scaffold_1:2515662-2515722	A5SS	0.0238928	NA	NA	0.0460905	0.052417	NA	NA	NA	NA
scaffold_1:2515723-2515735	Cassette	0.0909091	NA	NA	NA	NA	NA	NA	NA	0.229391
scaffold_1:2515723-2515791	A3SS	0.0909091	NA	NA	0.279012	0.232517	NA	NA	NA	NA
scaffold_1:2515723-2515791	A5SS	0.0909091	0.191781	0.218207	0.279012	0.232517	0.170347	0.311765	0.315517	0.226619
scaffold_1:2521596-2521631	A5SS	0.0486919	0.0769231	0.0366492	0.0648855	0.0730689	0.0857814	0.0367647	0.0308483	0.0401338
scaffold_1:2523061-2523075	A3SS	0.0952381	NA	NA	NA	NA	NA	0.285714	0.925926	0.923077
scaffold_1:2523326-2523383	IR	0.0449015	0.0319693	0.0204334	0.0209069	0.0228637	0.0300113	0.0320691	0.0186346	0.0557873
scaffold_1:2523474-2523528	IR	0.00467602	0.00356506	0.00423012	0.0134305	0.0131452	0.0125851	0.0167391	0.0222324	0.0712766
scaffold_1:2527924-2527929	A3SS	0.989983	1	0.979452	0.95858	0.981771	0.989899	0.962162	0.948661	0.969957
scaffold_1:2529643-2529708	IR	0.0232945	0.0666667	0.0254237	0.0530612	0.0504732	0.0548885	0.0490998	0.0526316	0.0282187
scaffold_1:2529963-2530051	IR	0.0357782	0.111111	0.00943396	0.015873	0.0171756	0.039666	0.011194	0.0320197	0.0164271
scaffold_1:2531493-2531539	A3SS	NA	NA	NA	NA	0	NA	NA	1	NA
scaffold_1:2531584-2531591	A3SS	NA	NA	NA	NA	0.785714	1	NA	0	NA
scaffold_1:2531584-2531591	A5SS	NA	NA	NA	NA	NA	1	NA	0	NA
scaffold_1:2534368-2534385	A3SS	0.947664	0.96875	0.962329	0.971654	0.971572	NA	0.956631	0.990805	0.993151
scaffold_1:2534368-2534385	A5SS	0.947664	0.96875	0.962329	0.971654	0.971572	0.970133	0.956631	0.990805	0.993151
scaffold_1:2542523-2542544	A3SS	NA	NA	NA	NA	0.875	0.133333	0.142857	NA	NA
scaffold_1:2542587-2542595	Cassette	1	NA	NA	0.8	NA	NA	NA	0.823529	NA
scaffold_1:2547034-2547093	A5SS	0.986413	NA	0.985366	0.965812	0.990132	0.932489	NA	0.990741	NA
scaffold_1:2551722-2551752	A3SS	NA	NA	0.932203	0.913043	0.91791	0.93	0.945455	0.876712	0.894737
scaffold_1:2551730-2551752	A3SS	NA	NA	NA	NA	0.91791	0.93	NA	NA	NA
scaffold_1:2551797-2551802	A5SS	NA	NA	NA	NA	0.0884354	0.0555556	NA	NA	NA
scaffold_1:2552401-2552407	A3SS	0.895349	1	NA	0.860606	0.876106	0.917476	0.936508	0.95625	0.886957
scaffold_1:2552401-2552407	A5SS	0.895349	NA	0.944056	0.860606	0.876106	0.917476	0.936508	0.95625	0.886957
scaffold_1:2562377-2562390	A3SS	0.459459	0	0	0	0.0040568	0.00161812	0.00232019	0.0194175	0.0227273
scaffold_1:2562435-2562441	A5SS	NA	0.980392	0.994565	0.965418	0.989817	0.995138	0.986047	0.945545	0.953488
scaffold_1:2562435-2562446	A5SS	0.540541	1	1	1	0.995902	0.998374	0.997647	0.979487	0.97619
scaffold_1:2563947-2564002	IR	0.0457516	0.0952381	0.0472973	0.0212766	0.035	0.0388601	0.0268657	0.0177778	0.0306748
scaffold_1:2566069-2566256	IR	0.661972	0.691176	0.765625	0.81477	0.845727	0.829787	0.892508	0.920561	0.947026
scaffold_1:2566154-2566195	Cassette	0.142857	NA	NA	0.0316456	0.00714286	0.145299	0.038835	0	0.0172414
scaffold_1:2566154-2566256	A3SS	0.132743	0.0454545	0	0.0316456	0.00714286	0.144681	0.038835	0	0.016129
scaffold_1:2566872-2566936	IR	1	1	0.958333	0.956522	0.939453	0.942974	0.950226	0.922652	0.941176
scaffold_1:2575478-2575533	IR	0.142857	0.030303	0.0279898	0.0965347	0.0783898	0.165414	0.119777	0.0533333	0.0218579
scaffold_1:2576089-2576104	A5SS	0.5	NA	NA	0.973404	NA	NA	NA	NA	NA
scaffold_1:2576104-2576113	A5SS	NA	NA	0.0568182	0.0213904	0.0224215	0.0343137	0.0135747	0.00867052	0.0252101
scaffold_1:2576147-2576169	A5SS	0.5	NA	NA	0.0265957	NA	NA	NA	NA	NA
scaffold_1:2576177-2576229	IR	NA	NA	NA	NA	NA	0.418103	NA	0.348039	NA
scaffold_1:2576358-2576369	A5SS	0.875	NA	0.983827	0.992687	0.985348	NA	0.995918	0.990458	0.987805
scaffold_1:2579456-2579509	IR	NA	1	0.865672	0.947059	NA	0.939394	0.858268	0.986667	1
scaffold_1:2582798-2582807	A3SS	NA	NA	NA	0	NA	NA	NA	0.142857	NA
scaffold_1:2583560-2583568	A3SS	0.808247	0.931034	0.955556	0.933066	0.955929	0.944376	0.921144	0.920245	0.92435
scaffold_1:2583560-2583568	A5SS	0.808247	0.931034	0.955556	0.933066	0.955929	0.944376	0.921144	0.920245	0.92435
scaffold_1:2583679-2583768	A3SS	0.948473	1	0.981481	0.987193	0.987002	0.980249	0.988261	0.990011	0.96945
scaffold_1:2583679-2583768	A5SS	0.948473	1	0.981481	0.987193	0.987002	0.980249	0.988261	0.990011	0.96945
scaffold_1:2583914-2583919	A3SS	NA	NA	NA	NA	0.285714	0.3	0.2	0.55	NA
scaffold_1:2584035-2584142	A3SS	0.940379	NA	1	NA	1	NA	NA	0.998358	NA
scaffold_1:2584035-2584142	A5SS	0.940379	1	NA	1	NA	0.998183	0.998093	NA	1
scaffold_1:2596704-2596728	A3SS	0.866667	NA	NA	1	NA	NA	NA	NA	NA
scaffold_1:2596704-2596728	A5SS	0.866667	1	NA	1	NA	0.995455	0.993289	NA	0.986667
scaffold_1:2596802-2596846	A5SS	0	0	0.04375	0.0075188	0.008	0.00438596	0.0481928	0.070922	0.020202
scaffold_1:2596860-2596923	A3SS	1	1	0.95625	0.992481	0.991935	0.995614	0.950617	0.928571	0.979381
scaffold_1:2597417-2597469	IR	0.175	0.05	0.00985222	0.0694669	0.0381232	0.0899471	0.109649	0.0786517	0.0581395
scaffold_1:2598114-2598168	IR	0.294976	0.505495	0.659696	0.717098	0.684559	0.577222	0.678261	0.59562	0.680412
scaffold_1:2600336-2600344	A3SS	NA	NA	NA	NA	NA	NA	0.901408	0.993103	NA
scaffold_1:2602413-2602465	IR	1	NA	1	0.9375	0.982759	NA	1	NA	NA
scaffold_1:2603345-2603352	A3SS	0.0833333	NA	0.011236	0.00214133	0.00775946	0.00648649	0.0135501	0.00813953	NA
scaffold_1:2619582-2619649	IR	0.108108	0	0.0387597	0.134529	0.141667	0.181818	0.248485	0.105442	NA
scaffold_1:2620519-2620571	A3SS	NA	0.9375	1	0.957447	0.9875	0.965909	0.962025	0.951613	NA
scaffold_1:2620519-2620571	A5SS	0.882353	0.9375	1	0.957447	0.9875	0.965909	0.962025	0.951613	0.905882
scaffold_1:2620794-2620804	A5SS	NA	NA	NA	NA	NA	0.0576923	0.0428571	NA	0.0377358
scaffold_1:2622038-2622095	IR	0.92	0.9375	1	0.995968	0.995595	0.992443	0.995763	0.998299	0.982881
scaffold_1:2628395-2628408	A3SS	0.943128	1	NA	NA	NA	0.984	1	NA	1
scaffold_1:2629780-2629839	IR	0.909639	1	1	0.996109	1	0.978979	0.979661	0.970787	0.984615
scaffold_1:2630558-2630624	IR	0.0863309	0	0.126761	NA	0.21875	0.106383	NA	NA	0.244186
scaffold_1:2635809-2635816	A3SS	0.149502	0.0666667	0.180723	0.2	0.235	0.202186	0.204545	0.188841	0.181818
scaffold_1:2635809-2635816	A5SS	NA	NA	NA	0.2	NA	0.202186	NA	NA	NA
scaffold_1:2635816-2635861	A5SS	NA	NA	0.0625	0	NA	NA	NA	0	NA
scaffold_1:2635863-2635946	Cassette	1	1	0.9375	1	1	0.994565	1	1	1
scaffold_1:2638740-2638745	A3SS	NA	0.8	NA	0.76089	0.720234	0.725632	0.70137	0.695026	0.651282
scaffold_1:2638740-2638745	A5SS	0.692494	0.8	0.649435	0.76089	0.720234	0.725632	0.70137	0.695026	0.651282
scaffold_1:2639678-2639687	A3SS	0.0592885	NA	NA	0.00179211	0.011713	NA	0	0	NA
scaffold_1:2643183-2643232	IR	0.0789474	0	0	0	0.0235294	0	0	0.0909091	0.0869565
scaffold_1:2643844-2643854	A3SS	0.940887	0.956522	0.976834	0.989744	0.97479	0.946619	0.960784	0.941176	0.909091
scaffold_1:2644785-2644793	A3SS	0.103967	0.0566038	0.0655738	0.101215	0.0756972	0.103611	0.0533881	0.0669856	0.0610687
scaffold_1:265071-265106	A5SS	0	0	0.00229885	0.0542986	0.0606509	0.0117096	0.0661479	0.00662252	0.0135135
scaffold_1:265124-265165	A3SS	1	1	0.997701	0.945701	0.939349	0.98829	0.933852	0.993377	0.986486
scaffold_1:2653489-2653556	IR	0.93617	NA	NA	NA	0.969697	0.92	0.946429	0.970588	NA
scaffold_1:265632-265643	A5SS	1	0.923077	0.995495	0.949474	0.853659	0.984334	0.890625	0.996633	0.975
scaffold_1:265695-265710	A3SS	0	0.0769231	0.0045045	0.0505263	0.146341	0.0156658	0.109375	0.003367	0.025
scaffold_1:2659968-2660017	IR	0.25	0.25	0.231343	0.30663	0.360248	0.287755	0.440633	0.405498	0.298851
scaffold_1:2660017-2660040	A3SS	1	1	0.990385	0.940075	0.962617	0.97486	0.981481	0.940217	0.983871
scaffold_1:2660017-2660040	A5SS	NA	NA	NA	0.940075	0.962617	0.97486	NA	0.940217	0.983871
scaffold_1:2660683-2660696	A3SS	NA	NA	NA	NA	0.875	NA	NA	1	NA
scaffold_1:2661316-2661324	MXE	NA	NA	NA	NA	0.25	NA	0.442953	NA	NA
scaffold_1:2661325-2661354	Cassette	NA	NA	NA	NA	1	NA	0.717557	NA	NA
scaffold_1:2664302-2664312	A3SS	0.929577	0.923077	0.953125	0.962264	0.96	0.917949	0.912088	0.942029	0.95122
scaffold_1:2665471-2665478	A5SS	0.962963	1	1	0.994898	0.97314	0.98062	0.98645	0.959569	0.937269
scaffold_1:2674092-2674146	IR	0.038961	0.0740741	0	0.117647	0.05	NA	NA	NA	0.0441176
scaffold_1:2674218-2674267	IR	NA	0.0454545	NA	0.0909091	NA	NA	NA	NA	NA
scaffold_1:2674344-2674406	IR	0.0178571	0	0	0.133333	0.225	0	0.0186335	0.165138	0.188889
scaffold_1:268440-268496	IR	0	0.0465116	0.0344828	0.0634921	0.0717762	0.0679825	0.0926641	0.107317	0.0510441
scaffold_1:2694212-2694258	A3SS	NA	NA	1	NA	NA	0.941489	NA	0.907692	NA
scaffold_1:2694212-2694262	A3SS	0.803922	NA	NA	1	1	0.983333	0.995575	1	1
scaffold_1:2694604-2694667	IR	0.791757	0.8	0.989796	0.984436	0.973856	0.950673	0.973747	0.925581	0.965217
scaffold_1:2694761-2694815	A5SS	0.44898	NA	0.977273	NA	NA	0.949275	NA	0.916667	NA
scaffold_1:2699782-2699787	Cassette	0.576958	0.156098	0.215023	0.537176	0.285249	0.392317	0.524399	0.497308	0.26466
scaffold_1:2715935-2715947	A3SS	0.0895522	0	0.127273	0.0875912	0.0806452	0.0992366	0.101307	0.0930233	0.108696
scaffold_1:2716601-2716656	AltStart	0.888889	NA	NA	NA	NA	NA	0.95	0.953125	NA
scaffold_1:2721459-2721465	A3SS	0.425676	0.272727	0.470149	0.563768	0.503243	0.521898	0.590629	NA	NA
scaffold_1:2721459-2721465	A5SS	0.425676	0.272727	0.470149	0.563768	0.503243	0.521898	0.590629	NA	0.451351
scaffold_1:2722428-2722495	IR	0.883721	0.934783	0.952555	0.973594	0.967175	0.961694	0.959746	0.957233	0.942974
scaffold_1:2732416-2732429	A3SS	0.947917	0.928571	0.956835	0.880734	0.82243	0.944828	0.949074	0.877778	0.910646
scaffold_1:2732416-2732429	A5SS	NA	0.928571	0.956835	0.880734	NA	NA	NA	NA	NA
scaffold_1:2737924-2737985	IR	0.992958	0.833333	0.526316	0.757576	0.852459	0.594203	0.814433	0.997619	1
scaffold_1:2758213-2758288	IR	0.0675676	0	0	0.0326797	0.00925926	0.0229008	0.0228571	0.00759013	0.00833333
scaffold_1:2758517-2758568	IR	0.035	0.15625	0.078125	0.0144928	0.00502513	0.0138504	0.0117994	0.00661626	0.0210773
scaffold_1:2759427-2759479	IR	0.0316832	0	0.0472441	0.0549683	0.0484375	0.0457516	0.0863309	0.0262273	0.0460624
scaffold_1:2761216-2761268	IR	0.119048	0.0181818	0.00660066	0.0658228	0.0277228	0.046875	0.108046	NA	0.027972
scaffold_1:2765642-2765695	IR	0.85	0.461538	0.151515	0.285714	0.261062	0.817778	0.553398	0.358209	0.529412
scaffold_1:2768758-2768767	A3SS	NA	NA	NA	0.777778	NA	NA	NA	0.25	NA
scaffold_1:2768767-2768773	A3SS	NA	NA	0.823529	0.125	NA	NA	NA	NA	NA
scaffold_1:2768816-2768849	A5SS	NA	NA	1	NA	NA	NA	0	NA	NA
scaffold_1:2771146-2771151	A3SS	0.00966184	0.047619	0.05	0.0330033	0.0375335	0.0515695	0.0270833	0.0560224	0.0205128
scaffold_1:2771728-2771741	A3SS	0.973154	0.75	0.924242	0.969565	0.972222	0.956311	0.918367	0.932605	0.921311
scaffold_1:2773123-2773148	A3SS	NA	NA	NA	NA	0.833333	NA	NA	0.259259	NA
scaffold_1:2776739-2776751	A5SS	NA	NA	NA	NA	NA	NA	NA	0.407407	0.214286
scaffold_1:2776751-2776767	A5SS	NA	0	0.0909091	0.440678	NA	NA	NA	NA	NA
scaffold_1:2776751-2776880	A5SS	0.3125	NA	0.53125	NA	NA	NA	NA	NA	0.8125
scaffold_1:2778755-2778814	Cassette	0.714286	0.786885	0.705128	0.732283	0.707483	NA	0.779245	0.752137	0.651163
scaffold_1:2778755-2778840	A3SS	0.714286	0.786885	0.705128	0.732283	0.707483	0.799719	0.778828	0.752137	0.651163
scaffold_1:2784450-2784508	IR	0.384615	0.666667	0.486486	0.253968	0.215789	0.346667	0.396313	NA	0.416216
scaffold_1:2784773-2784782	A3SS	0.189189	0	0.121212	0	0.0206186	0.038961	0.0625	0.00869565	0.00970874
scaffold_1:2793146-2793206	IR	0.364441	0.876543	0.714286	0.80597	0.811663	0.85395	0.860039	0.768103	0.747085
scaffold_1:2793999-2794079	AltStart	NA	NA	NA	NA	NA	NA	0.944444	1	NA
scaffold_1:2794079-2794094	A3SS	0.923835	0.977011	0.990431	0.980276	0.964444	0.945187	0.979038	0.973315	0.989899
scaffold_1:2794079-2794094	A5SS	0.923835	NA	0.990431	0.980276	0.964444	0.945187	0.979038	0.973315	0.989899
scaffold_1:2806801-2806815	A3SS	NA	NA	NA	NA	NA	0.222222	0.272727	NA	NA
scaffold_1:2811942-2811996	IR	NA	NA	NA	0.0648596	0.0526829	0.0906977	NA	0.0393743	NA
scaffold_1:2821743-2821879	A5SS	NA	NA	NA	NA	0.875	NA	NA	1	NA
scaffold_1:2826087-2826113	A5SS	NA	NA	NA	0.583333	NA	NA	NA	0.72973	1
scaffold_1:2826097-2826147	IR	NA	NA	NA	0.884615	NA	NA	NA	0.520325	0.491228
scaffold_1:2826113-2826147	A3SS	0.148148	NA	NA	0.625	0.111111	0.391304	NA	0.253165	0
scaffold_1:2826113-2826147	A5SS	NA	NA	NA	0.625	NA	0.391304	NA	0.253165	NA
scaffold_1:2826147-2826188	Cassette	NA	NA	NA	0.941176	NA	NA	NA	1	1
scaffold_1:2826163-2826188	A3SS	0.355556	0.5	0.25641	NA	0.268908	0.510204	0.69697	0.496183	0.355932
scaffold_1:2826163-2826188	A5SS	0.355556	0.5	0.25641	0.490566	0.268908	0.510204	0.69697	0.496183	0.355932
scaffold_1:2826254-2826284	A3SS	0.355556	0.5	0.243902	0.472727	0.268908	0.510204	0.666667	NA	NA
scaffold_1:2826254-2826284	A5SS	0.355556	0.5	0.243902	0.472727	0.268908	0.510204	0.666667	0.488722	0.355932
scaffold_1:2831473-2831514	A3SS	0.934066	NA	NA	0.956757	NA	0.963504	NA	0.973684	0.8875
scaffold_1:2831549-2831574	A5SS	0.032967	NA	NA	0.0216216	NA	0.0218978	NA	0.0204678	0.075
scaffold_1:2834244-2834407	IR	0.687708	0.747368	0.704268	0.602679	0.673966	0.753086	0.708487	0.738462	0.792553
scaffold_1:2841318-2841368	IR	0.186235	0	0.019802	0.0224719	0.0336391	0.0485075	0.110092	0.0674157	0.033195
scaffold_1:2842711-2842760	IR	0.0606061	0.307692	0.146067	0.181081	0.227848	0.204986	0.0533333	0.0776119	0.104439
scaffold_1:2852964-2853015	IR	NA	0.0571429	NA	NA	NA	0.0159574	NA	NA	NA
scaffold_1:2853103-2853156	IR	0.0334448	0.09375	0.0125786	0.0140389	0.0149551	0.0184843	0.0106667	0.0242131	0.0341463
scaffold_1:2855034-2855088	IR	0.216216	NA	NA	0.145833	0.142857	0.100437	0.433735	0.28125	NA
scaffold_1:2855501-2855552	IR	0.0408163	0.1	0	0.0309278	0.0607477	0.0390879	0.0763359	0.152381	0.89
scaffold_1:2862218-2862270	IR	0.034965	0	0.00829876	0.0163265	0.0226537	0.0641221	0.0782998	0.0152905	0.0307692
scaffold_1:2869186-2869264	IR	0.92	NA	NA	0.946746	NA	NA	0.95082	0.943548	NA
scaffold_1:2882998-2883053	IR	0.774194	0.980769	0.976744	0.820513	0.914634	0.775	0.730159	0.666667	0.608696
scaffold_1:2916554-2916609	IR	NA	NA	NA	0.909091	NA	0.533333	NA	0.642857	NA
scaffold_1:2924208-2924259	IR	0.0405644	0.130435	0.0217216	0.0279279	0.0326581	NA	0.138985	0.093779	0.119584
scaffold_1:2924318-2924372	IR	0.034581	0.103604	0.0299145	0.0225485	0.0334076	0.0350221	0.132583	0.114994	0.13834
scaffold_1:2927884-2927981	IR	0.0503834	0	0.00869565	0.0109718	0.0167598	0.00996264	0.0331429	0.0495868	0
scaffold_1:2928537-2928554	A5SS	0.111349	0.05	0.0374332	0.0290456	0.0120482	0.0200803	0.0291005	0.202703	0.157895
scaffold_1:2942788-2942845	IR	0.931373	1	0.985507	0.995541	0.98999	1	0.980551	NA	0.915888
scaffold_1:2943261-2943316	IR	NA	NA	0.989933	NA	NA	NA	NA	NA	0.935185
scaffold_1:2943541-2943604	A3SS	0.00826446	0.0625	0.0108696	0.00947867	0.00480769	0.00675676	0	0.0383142	0.0232558
scaffold_1:2963842-2963881	A3SS	NA	NA	NA	0.947368	0.969925	0.962963	0.976	NA	0.981735
scaffold_1:2963899-2963935	A5SS	NA	NA	NA	0.0526316	0.0300752	0.037037	0.024	NA	0.0159817
scaffold_1:2966664-2966674	A5SS	0.885714	0.75	0.970238	0.881579	0.895	0.914286	0.927536	0.932127	0.865169
scaffold_1:2969244-2969290	A3SS	0.636364	1	1	1	1	0.994792	0.968944	0.904494	0.847222
scaffold_1:2969301-2969346	A5SS	0.351852	0	0	0	0	0.00520833	0.0310559	0.0903955	0.15493
scaffold_1:2969982-2970034	A3SS	0.47619	1	1	0.913043	0.942857	0.992424	0.96875	0.861111	0.607143
scaffold_1:2970041-2970088	A5SS	0.52381	0	0	0.0869565	0.0571429	0.00760456	0.0314465	0.140845	0.392857
scaffold_1:2970100-2970119	A3SS	NA	NA	NA	0.931818	0.984375	NA	0.942308	0.863636	0.6
scaffold_1:2970172-2970188	A5SS	0.43662	0	0	0.0681818	0.015625	0.00383142	0.0576923	0.136364	0.4
scaffold_1:2972941-2973004	IR	0.11039	0	0.075	0.0657895	0.025	0.0693642	0.2	0.106383	0.0778547
scaffold_1:2973632-2973641	A3SS	0.898396	0.857143	0.8	NA	0.721951	NA	0.871658	0.847384	0.835495
scaffold_1:2973632-2973641	A5SS	0.898396	0.857143	0.8	0.785714	0.721951	0.739837	0.871658	0.847384	0.835495
scaffold_1:2988634-2988653	A5SS	1	NA	1	1	1	1	1	1	0.823529
scaffold_1:2990092-2990179	A3SS	NA	NA	NA	NA	NA	1	0.857143	NA	NA
scaffold_1:2990666-2990698	A3SS	0.944649	1	1	0.968553	0.995968	0.964045	0.977778	0.982639	0.983099
scaffold_1:2990759-2990780	A5SS	0.944649	1	1	0.968553	0.995968	0.964045	0.977778	0.982639	0.983099
scaffold_1:2993064-2993139	A3SS	1	NA	NA	NA	NA	NA	0.9	NA	NA
scaffold_1:2993129-2993139	A3SS	0.156863	0	0	0.0238095	0.0603448	0.00806452	0.0273556	0.0540541	0
scaffold_1:2993180-2993211	A5SS	0.877551	1	1	0.984	0.947826	0.994609	0.981595	0.981308	1
scaffold_1:2993211-2993325	A5SS	1	NA	NA	NA	NA	NA	0.857143	NA	NA
scaffold_1:299724-299773	IR	0.05	0.0625	0.0857143	0.0138741	0.00627803	0.0215232	0.00118765	0.57204	0.51378
scaffold_1:2997516-2997543	A3SS	0.950617	0.692308	0.748148	0.668	0.727642	0.684049	0.725888	0.686441	0.578125
scaffold_1:3005705-3005747	A3SS	1	1	1	1	1	1	1	0.831325	0.09375
scaffold_1:3005763-3005825	A5SS	0	0	0	0	0	0	0	0.168675	0.9
scaffold_1:3023753-3023773	A3SS	0.0509804	0	0.111111	NA	0.0526316	0.0344828	NA	NA	NA
scaffold_1:3024228-3024244	A5SS	0.963446	1	0.982456	0.606557	0.717949	0.561905	0.564103	0.661538	0.5
scaffold_1:3024231-3024244	A5SS	0.965969	0.961538	0.933333	0.637931	NA	NA	NA	NA	NA
scaffold_1:3024288-3024306	A3SS	0.0681818	0.0384615	0.0967742	0.559524	0.529412	0.635802	0.653543	0.565657	0.761905
scaffold_1:3043650-3043655	A3SS	0.436464	0.190476	0.0833333	0.243902	0.150877	NA	NA	0.212389	0.444444
scaffold_1:3043650-3043655	A5SS	0.436464	0.190476	0.0833333	0.243902	0.150877	0.268012	0.329749	0.212389	0.444444
scaffold_1:3047163-3047221	IR	NA	NA	NA	NA	NA	0.985437	0.903226	0.967442	0.943396
scaffold_1:305045-305114	IR	0	0.0209205	0	0.0262418	0.0161064	0.0744681	0.01417	0	0.0714286
scaffold_1:305114-305147	A5SS	0.96	0.979079	0.983193	0.967412	0.967631	0.966667	0.91028	0.777778	0.859922
scaffold_1:3061093-3061112	A5SS	0.0341463	0	0	0.0230769	0.00666667	0.0195122	0.00689655	0.00436681	0.179487
scaffold_1:3061146-3061171	A3SS	0.965854	1	1	0.976923	0.993333	0.980488	0.993103	0.995633	0.810127
scaffold_1:3061208-3061262	IR	0.103093	0	0.0102041	0.0576923	0.0543933	0.0460829	0.0352423	0.00872093	0.181818
scaffold_1:3061311-3061321	A5SS	0.95977	1	0.99115	0.981818	0.972441	1	0.984127	0.996114	0.921429
scaffold_1:3061361-3061373	A3SS	0.0402299	0	0.00884956	0.0181818	0.0275591	0	0.015873	0.00387597	0.0785714
scaffold_1:3061420-3061468	IR	0.0628743	0	0.0283019	0.0643564	0.0822511	0.037037	0.0686695	0.0217391	0.155963
scaffold_1:306216-306263	A3SS	NA	NA	NA	0.892944	0.907942	0.907692	NA	NA	NA
scaffold_1:306263-306272	A3SS	NA	0.011976	NA	0.0541237	0.101786	0.0166667	NA	NA	NA
scaffold_1:3064299-3064355	IR	0.05	0.142857	0.171429	0.214286	0.516129	0.297297	0.285714	0.241667	0.375
scaffold_1:3064792-3064860	IR	0.0898204	0	0.114286	0.272727	0.181818	0.340206	0.340909	0.015873	0.119266
scaffold_1:3083399-3083427	A3SS	0.0588235	0	0.109375	0.0620155	0.106383	0.0865385	0.14881	0.0462428	0.0338983
scaffold_1:3085776-3085792	A5SS	0.925	1	1	1	1	1	1	1	1
scaffold_1:3085846-3085886	A3SS	0.948718	1	1	1	1	1	1	1	1
scaffold_1:3148720-3148833	IR	NA	NA	0.0625	NA	NA	0.0384615	NA	NA	NA
scaffold_1:3148981-3149042	IR	0.352941	NA	0.439024	0.44086	0.476923	0.36	0.379791	0.596288	0.66129
scaffold_1:3149126-3149179	IR	0.116279	0	0.0645161	0.0223881	0.0383142	0.0285714	0.0241692	0.071618	0.0333333
scaffold_1:3149308-3149361	IR	NA	NA	NA	NA	NA	NA	0.275974	0.208589	NA
scaffold_1:3149361-3149380	Cassette	NA	NA	0.9375	0.877378	NA	0.906103	NA	0.8576	NA
scaffold_1:3154027-3154137	IR	0.947368	NA	0.985612	0.981132	0.992248	0.993548	0.964427	0.997076	NA
scaffold_1:3154532-3154549	A3SS	0	0.1	0.0348837	0.0197044	0.0486322	0	0.0143541	0.0107914	0.030303
scaffold_1:3160808-3160868	A5SS	NA	0.8	0.836364	NA	NA	NA	NA	NA	NA
scaffold_1:3160816-3160868	A5SS	NA	1	NA	NA	NA	0.765152	NA	NA	NA
scaffold_1:3160873-3160905	Cassette	0.265306	0	0.0283688	0.153846	0.137584	0.172222	0.234234	0.168254	0.111111
scaffold_1:3160873-3160953	AltEnd	NA	0	NA	NA	NA	0.172222	NA	NA	NA
scaffold_1:3160873-3160953	AltStart	NA	0	0.0283688	NA	NA	0.172222	0.237668	0.170886	NA
scaffold_1:3167974-3168035	IR	0.037037	0.0666667	0.00348432	0	0.0123967	0.00315457	0.042735	0.0102041	0
scaffold_1:3173249-3173306	IR	0.875	1	1	1	0.993007	1	0.993151	0.996979	0.985
scaffold_1:3181618-3181647	A5SS	NA	NA	NA	0.906667	NA	NA	NA	0.975983	0.98829
scaffold_1:3181618-3181649	A5SS	NA	NA	NA	NA	NA	NA	NA	0	0.444444
scaffold_1:3181734-3181780	A3SS	NA	NA	NA	0.943662	NA	NA	NA	0.980263	0.990632
scaffold_1:3181780-3181837	A3SS	NA	NA	NA	NA	NA	NA	NA	1	0.5
scaffold_1:3183662-3183673	A3SS	0.818182	NA	NA	NA	0.971014	0.97351	NA	0.975265	0.940397
scaffold_1:318442-318475	AltEnd	NA	NA	NA	NA	NA	NA	0.9	0.333333	NA
scaffold_1:318464-318568	A5SS	1	NA	NA	NA	NA	NA	NA	0.545455	NA
scaffold_1:3186655-3186722	IR	0.2	0	0.294118	0.32	0.361111	0.113402	0.186667	0.264706	0.05
scaffold_1:3186742-3186804	IR	NA	0	NA	NA	NA	NA	NA	0.1875	NA
scaffold_1:319028-319038	A5SS	NA	NA	NA	0.428571	NA	0.4375	NA	NA	NA
scaffold_1:319269-319280	A3SS	NA	NA	NA	1	NA	0.998811	NA	0.928571	NA
scaffold_1:319280-319301	A3SS	NA	NA	NA	NA	0.333333	NA	0	0.142857	NA
scaffold_1:319282-319301	A5SS	NA	NA	NA	NA	0.428571	0.823529	0.541667	NA	NA
scaffold_1:3195195-3195267	IR	0.87156	0.980392	0.972851	0.991304	0.982036	0.955882	0.941176	0.978261	0.99062
scaffold_1:3203157-3203191	A3SS	0.35	NA	NA	NA	NA	0.176471	NA	0.121212	NA
scaffold_1:3227048-3227058	A3SS	NA	NA	NA	NA	NA	0.9625	0.994152	0.949791	0.952381
scaffold_1:3227048-3227058	A5SS	1	1	1	1	1	0.9625	0.994152	0.949791	NA
scaffold_1:3227097-3227114	A3SS	0.025974	0	0	0	0	0.0372671	0.00581395	0.0541667	NA
scaffold_1:3227097-3227114	A5SS	NA	NA	NA	NA	NA	0.0372671	0.00581395	0.0541667	0.047619
scaffold_1:3235664-3235746	IR	0.108974	0.125	0.0161616	0.0239362	0.0316344	0.0689655	0.0305344	0.0385802	0.0285326
scaffold_1:3259753-3259811	IR	1	1	1	0.999631	1	1	1	0.949625	0.996899
scaffold_1:3266408-3266503	A3SS	0.907216	0.978261	0.98773	0.99005	0.995526	1	0.984436	0.995185	0.997067
scaffold_1:3266921-3266934	A3SS	1	1	1	0.975225	0.996212	0.975155	0.996764	0.987871	0.927577
scaffold_1:3266921-3266934	A5SS	1	1	1	0.975225	0.996212	0.975155	0.996764	0.987871	0.927577
scaffold_1:3268283-3268331	IR	NA	NA	0.988889	NA	0.981221	0.974249	0.931818	0.996689	NA
scaffold_1:3284398-3284458	IR	0.859813	0.940594	0.946203	0.957071	0.95787	0.963131	0.965636	0.952242	0.948504
scaffold_1:3292403-3292413	A5SS	0.910853	1	0.986207	0.989761	0.988473	0.997743	0.997199	1	1
scaffold_1:3292461-3292634	A3SS	0.0972763	0	0.0137931	0.0102389	0.0115274	0.00225734	NA	0	0
scaffold_1:3292664-3292739	A3SS	0.0550459	NA	NA	NA	NA	NA	0.0025974	NA	NA
scaffold_1:3297236-3297343	IR	0.937362	0.923977	0.909308	0.964877	0.957912	0.978796	0.957968	0.884346	0.839286
scaffold_1:3297343-3297444	AltEnd	0.794393	0.928571	1	1	0.986842	0.957746	1	1	1
scaffold_1:3299206-3299218	A3SS	0.563574	0.75	0.554054	0.588146	0.641154	0.669903	0.545328	0.518382	0.524038
scaffold_1:3306070-3306129	IR	0.018018	0	0	0.0046729	0	0.10596	0	0.00210084	0.0041841
scaffold_1:3306997-3307121	IR	0.05	0.111111	0.0314961	0.039604	0.039886	0.191176	0.0698413	0.038078	0.0541872
scaffold_1:330970-331172	IR	0.66	1	0.909091	0.9375	0.990385	0.97561	0.990291	0.972973	0.971429
scaffold_1:3337636-3337746	IR	0.020979	0.0714286	0.037037	0.0765027	0.0766423	0.0769231	0.129534	0.0786026	0.0882353
scaffold_1:3340639-3340675	A3SS	0.0769231	0.25	0.0813953	0.162866	0.200308	0.204678	0.224315	0.19685	0.162602
scaffold_1:3340639-3340675	A5SS	NA	0.25	0.0813953	NA	0.200308	0.204678	0.224315	NA	NA
scaffold_1:3341287-3341303	A3SS	0.937853	0.977778	0.95539	0.896632	0.881188	0.924706	0.844648	0.868201	0.87594
scaffold_1:3344308-3344327	A3SS	0.963889	0.860656	0.915441	0.875397	0.870224	0.894886	0.841302	0.792236	0.744977
scaffold_1:3347978-3348055	IR	0.699029	0.75	0.5	0.602787	0.575658	0.482906	0.710811	0.581897	0.654206
scaffold_1:3357724-3357777	IR	0.915254	0.928571	1	0.971963	0.991597	0.987069	0.964286	0.978873	1
scaffold_1:3358837-3358891	IR	0.00952381	0	0.0102426	0.00578704	0.0319462	0.0436409	0.0673267	0.0135606	0.0235849
scaffold_1:3359239-3359261	A3SS	NA	NA	0.578947	NA	NA	NA	NA	0.857143	NA
scaffold_1:3360153-3360216	IR	0.2	NA	NA	NA	NA	0.777778	0.444444	0.875	NA
scaffold_1:3362729-3362789	IR	0.941176	NA	NA	1	0.993289	0.991667	1	0.993902	NA
scaffold_1:3376804-3376825	A3SS	0.365079	1	0.647059	0.204819	0.297521	0.466667	0.269036	0.127551	0.118056
scaffold_1:3376804-3376843	Cassette	NA	1	NA	0.92623	0.927711	NA	0.956349	0.918519	0.92268
scaffold_1:3377143-3377217	A3SS	0.555556	NA	NA	NA	NA	0.173913	NA	NA	NA
scaffold_1:3384151-3384237	IR	0.763158	NA	1	NA	NA	0.769231	NA	NA	NA
scaffold_1:3384507-3384580	IR	0.52	0.5	0.5	0.372093	0.333333	0.291667	0.162791	0.223881	0.204819
scaffold_1:3384773-3384847	IR	0.125	0	0	NA	NA	0.08	NA	NA	NA
scaffold_1:3391074-3391098	A3SS	0.00198807	0	0.00884956	0.0275229	0.0336538	0.0240964	0.0560224	0.00818331	0.0254237
scaffold_1:3391165-3391179	A5SS	NA	1	0.991304	0.972477	0.966346	0.975904	0.943978	0.991817	0.974576
scaffold_1:3391228-3391245	A3SS	0.962963	NA	NA	NA	NA	NA	0.157895	NA	NA
scaffold_1:3391282-3391304	A5SS	0	NA	NA	NA	NA	NA	0.8	NA	NA
scaffold_1:3395264-3395317	IR	0.59447	0.923077	0.864261	0.873377	0.92029	0.792176	0.763066	0.764865	0.495349
scaffold_1:3395443-3395504	IR	NA	0	0.0111421	0.0454545	0.0447154	NA	0.0656566	0.0442804	NA
scaffold_1:3410105-3410513	IR	0.060241	0	0.0129032	0.057377	0.0957096	0.0634146	0.141935	0.0353357	0.0458716
scaffold_1:3411470-3411482	A3SS	0.747006	0.813433	0.77608	0.820601	0.82153	0.82397	0.810578	0.802111	NA
scaffold_1:3411470-3411482	A5SS	0.747006	0.813433	0.77608	0.820601	0.82153	0.82397	0.810578	0.802111	0.778481
scaffold_1:3414362-3414367	A3SS	0.871429	1	0.816327	0.708333	NA	NA	NA	NA	NA
scaffold_1:3414362-3414376	A5SS	NA	0.8	NA	NA	NA	NA	NA	NA	0.78125
scaffold_1:3420197-3420202	A3SS	0.973545	0.923077	0.925	0.891473	0.843284	0.887299	0.826347	0.884921	0.904545
scaffold_1:3430468-3430490	A3SS	0.478261	NA	NA	NA	NA	0.0142349	NA	NA	0
scaffold_1:3432429-3432493	IR	0.444444	0.969697	0.781818	0.80813	0.809587	0.86216	0.844211	0.56705	0.755102
scaffold_1:3433992-3434008	A5SS	0.971061	0.956522	0.955056	0.925581	0.889299	0.965079	0.918269	0.936073	0.928
scaffold_1:3434981-3435041	IR	0.986711	0.927536	0.951613	0.963893	0.984615	0.983591	0.994059	0.987013	1
scaffold_1:3436942-3436952	A3SS	NA	0.176471	NA	0.0795455	0.128205	0.101695	0.0697674	NA	NA
scaffold_1:3436942-3437047	IR	NA	NA	NA	NA	0.364486	0.376471	NA	0.0608273	0.0571429
scaffold_1:3437009-3437047	A5SS	NA	0.176471	NA	0.0795455	0.116883	0.0862069	0.0689655	NA	NA
scaffold_1:3437491-3437547	A5SS	NA	NA	NA	0.859649	0.942029	NA	0.947368	1	NA
scaffold_1:3444486-3444576	A5SS	0.397778	0	0.416974	0.483193	0.436261	0.504673	0.472603	0.458696	0.529595
scaffold_1:3444486-3444629	IR	0.5	0.4375	0.478548	0.515748	0.501253	0.646667	0.552326	0.532833	0.582873
scaffold_1:3448647-3448789	IR	0.138889	0.0833333	0.111111	0.101852	0.102941	0.0714286	0.0266667	0.0426829	0.010989
scaffold_1:3452098-3452136	Cassette	NA	0.2	0.255556	NA	0.376812	NA	0.37156	0.421053	NA
scaffold_1:3452098-3452147	Cassette	0.642023	0.2	0.271739	0.4625	0.376812	0.647436	0.37156	0.421053	0.616034
scaffold_1:3452136-3452147	A5SS	0.0330579	NA	NA	0.16	NA	NA	NA	0	0.134615
scaffold_1:3475762-3475898	IR	0.761905	0.875	0.206667	0.189034	0.256663	0.253259	0.350926	0.554945	0.614907
scaffold_1:3476095-3476179	IR	0.675676	0.555556	NA	NA	NA	NA	NA	NA	NA
scaffold_1:3488545-3488729	A3SS	0.0588235	NA	0	0.0145985	0.0123457	0.0129032	0	0.00473934	NA
scaffold_1:3501362-3501570	Cassette	1	NA	NA	NA	NA	1	0.588235	0.339286	NA
scaffold_1:3501746-3501813	IR	0.994214	1	1	0.884058	0.956522	1	0.975684	0.605839	0.6
scaffold_1:3510395-3510402	A3SS	0.0629921	NA	NA	0.0289389	0.0071599	0.0122164	0.0277778	0.00961538	0.0175439
scaffold_1:351145-351151	A5SS	0.0107914	0.111111	NA	0.0129199	0.0162866	0.0206186	0.0660377	0.0555556	NA
scaffold_1:3516143-3516209	IR	0.2	NA	NA	NA	NA	NA	NA	NA	0.5
scaffold_1:3522440-3522510	IR	NA	NA	NA	1	1	0.926829	1	1	1
scaffold_1:3527808-3527882	IR	0.0540852	0.684211	0.329114	0.381356	0.0747664	0.750087	0.496732	0.0344828	0.464286
scaffold_1:3530050-3530106	IR	0.587302	1	1	0.936508	0.965986	0.924686	0.976744	0.96337	0.920635
scaffold_1:3530723-3530787	IR	NA	1	1	0.991597	0.962963	1	1	0.829545	0.62963
scaffold_1:3533613-3533623	A3SS	1	0.941176	0.988235	1	1	NA	1	0.992063	0.981651
scaffold_1:3533776-3533784	A3SS	0.922078	0.979167	0.98893	0.953875	0.974322	0.933333	0.952542	0.950538	0.952381
scaffold_1:3558721-3558781	IR	0.0188679	0	0.00656455	0.010989	0.038961	0.0393013	0.0561798	0.0332447	0.115385
scaffold_1:3566021-3566101	AltStart	0	0.0625	0.0120482	0.0124224	0.0223881	NA	0.0534591	0.0125	0
scaffold_1:3566021-3566128	A5SS	0	0.0625	0.0120482	0.0124224	0.0223881	0.153846	0.0534591	0.0125	0
scaffold_1:357606-357683	IR	0.0416667	0	0	0.0769231	0.0111732	0.0186916	0.0638298	0.013986	0
scaffold_1:3580401-3580481	AltEnd	NA	NA	NA	NA	NA	NA	NA	0.914286	0.470588
scaffold_1:3596345-3596353	A3SS	0.138889	NA	NA	0.0761905	NA	0.0851064	0.0483871	0.0833333	NA
scaffold_1:3596345-3596416	IR	0.184211	0.25	0.0696203	0.0892019	0.192308	0.14094	0.202703	0.144444	0.134328
scaffold_1:3597047-3597061	A3SS	0.123077	0	0.0139373	0.0340909	0.064588	0.045045	0.0822785	0.0633803	0.0294118
scaffold_1:3597047-3597061	A5SS	0.123077	0	0.0139373	0.0340909	0.064588	0.045045	0.0822785	0.0633803	0.0294118
scaffold_1:3597733-3597801	A3SS	0.0925926	0	0.045977	0.077381	NA	0.100629	0.116564	NA	NA
scaffold_1:3597733-3597801	A5SS	0.0925926	0	0.045977	0.077381	0.0226537	0.100629	0.116564	0.230263	0.215686
scaffold_1:3598126-3598170	A3SS	0.09375	0	0.00675676	0	0	0.0208333	0	0	0
scaffold_1:3598126-3598170	A5SS	0.09375	NA	NA	0	0	0.0208333	NA	0	0
scaffold_1:3615724-3615730	A3SS	0.00970874	0	0	0.00167224	0	0.0043573	0	0.113095	0.0017331
scaffold_1:3615795-3615942	A5SS	0.996753	1	1	1	1	1	1	0.919753	0.999133
scaffold_1:3623046-3623144	IR	0.107345	0.0232558	0.0315568	0.0146543	0.0309524	0.0248963	0.0381089	0.0180981	0.0371747
scaffold_1:365616-365667	IR	NA	NA	NA	0.997605	0.999051	0.997348	NA	0.94	NA
scaffold_1:3659516-3659575	IR	0	0	0.00687285	0.0434783	0.0693431	0	0.0958904	0.00582791	0.0109141
scaffold_1:3660143-3660305	IR	0	0.181818	0.0367647	0.1	0.0454545	0.0909091	0.0208333	0.0108142	0.00862069
scaffold_1:3668536-3668553	A3SS	NA	NA	NA	0.166667	NA	NA	0.227273	NA	NA
scaffold_1:3668596-3668639	Cassette	NA	NA	NA	0.925926	NA	NA	0.880952	NA	NA
scaffold_1:3668646-3668692	A5SS	NA	NA	NA	0.12	NA	NA	0.208333	NA	NA
scaffold_1:3687142-3687275	Cassette	NA	NA	NA	NA	0.769231	0.8	0.820513	NA	NA
scaffold_1:369832-369906	IR	0.0989583	0.107143	0.0319149	0.0303738	0.0629496	0.0470219	0.0618557	0.158696	0.111888
scaffold_1:3700191-3700254	IR	NA	NA	0.909091	0.938462	0.931818	NA	0.918919	0.695652	0.689655
scaffold_1:3700377-3700475	A5SS	NA	NA	NA	0.25	NA	NA	NA	0.142857	0.642857
scaffold_1:3700538-3700618	AltEnd	NA	NA	NA	0.25	NA	NA	NA	0.166667	0.642857
scaffold_1:3723933-3724025	A3SS	0	0.0526316	0.0119048	0.00198807	0.00322581	NA	0	0.0142653	NA
scaffold_1:3723933-3724100	IR	0.296296	0.571429	0.207006	0.427594	0.359294	0.484076	0.186404	0.0932983	0.216216
scaffold_1:3724553-3724585	A3SS	0.192308	0.025974	0.0183673	0.0552727	0.0326087	0.0517711	0.096248	0.0471254	0.0483871
scaffold_1:3725736-3725844	A3SS	NA	NA	0	0.01	0	0	0	0.181818	0.769231
scaffold_1:3726062-3726072	A3SS	0.111111	NA	0.866667	0.967213	0.94958	0.928571	0.939394	0.385965	0.0454545
scaffold_1:3726120-3726145	A5SS	0.888889	NA	0.142857	0.0327869	0.0540541	0.0740741	0.0631579	0.636364	0.954545
scaffold_1:3737214-3737280	IR	1	NA	NA	NA	NA	0.995671	NA	0.817073	NA
scaffold_1:3737808-3737858	IR	0.901099	1	0.986842	0.992537	0.995846	0.996241	0.991034	0.985163	1
scaffold_1:374387-374399	A5SS	NA	NA	0	NA	1	NA	NA	NA	NA
scaffold_1:3752417-3752426	A3SS	NA	NA	NA	0.833333	NA	0.885714	0.93617	NA	NA
scaffold_1:3755722-3755727	A3SS	0.909091	0.933333	0.859649	0.752688	0.774194	0.80597	0.64539	0.75	0.789474
scaffold_1:3756268-3756319	IR	0.5	0.833333	0.941606	0.94186	0.941349	0.9319	0.952596	0.937662	0.958621
scaffold_1:3756556-3756566	A3SS	1	0.933333	0.983051	0.983539	1	1	0.990506	0.994505	1
scaffold_1:3756660-3756753	IR	0.3	0.25	0.391304	0.515337	0.465278	0.538462	0.449782	0.382353	0.447761
scaffold_1:3784587-3784599	A3SS	0.0952381	0.166667	0.0483871	0.0491803	0.0840336	0.0357143	0.0632184	0.0555556	0.0289855
scaffold_1:3789277-3789338	IR	0.487342	0.666667	0.684211	0.608696	0.557047	0.540541	0.755365	0.606742	0.488636
scaffold_1:3798833-3798892	IR	0.107692	0.1	0	0.04	0.0190678	0.0574506	0.0547046	0.00733496	0.0181818
scaffold_1:380407-380412	A3SS	1	1	1	0.937931	1	0.993421	0.937107	0.987097	0.984962
scaffold_1:3819841-3819894	IR	0.938776	1	0.969388	0.924837	0.960854	0.953678	0.966495	0.982906	0.961957
scaffold_1:3834671-3834742	IR	0.703704	NA	NA	0.866667	0.954545	0.860465	NA	0.997072	NA
scaffold_1:3836200-3836213	A3SS	0.910714	NA	NA	0.987603	0.982759	0.97205	0.980843	NA	NA
scaffold_1:3839918-3839971	IR	0.987097	0.888889	0.959184	0.982051	0.975684	0.937198	0.990596	0.967181	0.989011
scaffold_1:3861980-3862055	IR	NA	NA	NA	0.88	NA	NA	NA	0.940678	0.842105
scaffold_1:389971-389985	A5SS	1	1	1	0.998158	0.999445	1	0.999051	1	0.909953
scaffold_1:390025-390039	A3SS	0	0	0	0.00184162	0.000554939	0	0.000948767	0.00065189	0.100703
scaffold_1:3903678-3903688	A3SS	0.888462	0.666667	0.927273	0.924051	0.809524	0.932773	0.753247	0.883117	0.842105
scaffold_1:3903894-3903901	A3SS	0.972973	NA	NA	0.961538	0.967742	0.98125	NA	0.934066	NA
scaffold_1:3906256-3906306	A3SS	NA	0.214286	0.0430108	0.0677966	0.138486	0.096	0.198422	0.00388234	NA
scaffold_1:3912999-3913013	A3SS	NA	NA	0.0945946	NA	0.153846	NA	NA	0.147059	NA
scaffold_1:3919978-3920038	IR	0	0	0.0810811	0.0710306	0.0851528	0.0554245	0.0730247	0.0565878	0.0503268
scaffold_1:3930760-3930787	A3SS	0.339869	0.636364	0.301724	0.459877	0.398496	0.45	0.464183	0.366906	0.461538
scaffold_1:3930760-3930787	A5SS	0.339869	0.636364	0.301724	0.459877	0.398496	0.45	0.464183	NA	0.461538
scaffold_1:3931959-3931964	A3SS	0.944444	1	1	0.992443	0.983539	1	0.986813	0.988889	0.995392
scaffold_1:3951999-3952150	A3SS	0.130011	0.210526	0.294542	NA	0.199834	0.107876	0.257443	0.26356	0.420223
scaffold_1:3951999-3952150	A5SS	0.130011	0.210526	0.294542	0.239271	0.199834	NA	0.257443	0.26356	0.420223
scaffold_1:3952210-3952216	Cassette	0.130011	0.210526	0.294542	0.239271	0.199834	0.107852	0.257768	0.26356	0.420223
scaffold_1:3952210-3952290	AltEnd	0.130011	0.210526	0.294542	0.239271	0.199834	0.107852	NA	0.26356	0.420223
scaffold_1:3952210-3952290	AltStart	0.130011	0.210526	0.294542	0.239271	0.199834	0.107876	NA	0.26356	0.420223
scaffold_1:3954090-3954154	IR	0.0909091	0.025	0.0134529	0.04	0.0349206	0.0558931	0.0630699	0.0444444	0.0901639
scaffold_1:3955333-3955338	A3SS	0.0285714	0.0307692	0.0425532	0.0333333	0.0310559	0.0525568	0.0385757	0	0.130435
scaffold_1:4004523-4004574	IR	0	0	0	NA	0	0.00387597	NA	NA	0.0681818
scaffold_1:4004840-4004888	IR	0	0.0625	0.0454545	0.0813492	0.0608108	0.119658	0.0576441	0.04	0.131579
scaffold_1:4007390-4008013	A3SS	NA	NA	NA	0.942857	0.954545	NA	NA	0.976048	NA
scaffold_1:4010514-4010570	IR	0.930818	1	0.969163	0.943218	0.930288	0.928889	0.892377	0.951965	0.853333
scaffold_1:4037316-4037351	A3SS	0.997245	1	1	0.978166	0.985915	0.988327	0.977064	0.943925	0.985507
scaffold_1:4073469-4073487	A3SS	0.806122	0.888889	0.538462	0.512821	0.5	0.654867	0.5	0.5	0.472749
scaffold_1:4081979-4082038	IR	0.0578035	0.428571	0.0166667	0.047619	0.0258065	0.031401	0.0714286	0	0
scaffold_1:4091343-4091525	A3SS	NA	NA	NA	NA	NA	0.01	NA	0.0653595	0.0434783
scaffold_1:409680-409711	A5SS	NA	NA	NA	0.125	0.823529	NA	NA	NA	NA
scaffold_1:409731-409777	AltEnd	NA	NA	NA	0.875	0.176471	NA	NA	NA	NA
scaffold_1:4127934-4128595	IR	0.0119522	0.0119048	0.00801282	0.0258349	0.0227153	0.0425717	0.0874587	0.0457542	0.0615797
scaffold_1:414019-414075	IR	0.505652	0.145912	0.326053	0.256953	0.287318	0.2932	0.506427	0.468491	0.353041
scaffold_1:414075-414080	A5SS	0.91134	0.884565	0.839418	0.891391	0.882385	0.901905	0.911675	0.814485	0.792141
scaffold_1:4143597-4143602	A3SS	NA	NA	NA	NA	NA	0.890351	NA	NA	0.894915
scaffold_1:4144131-4144184	IR	0.209091	0.5	0.230769	0.221843	0.227612	0.277612	0.376471	0.37037	0.339416
scaffold_1:4146283-4146308	A3SS	NA	NA	NA	NA	NA	NA	0.533333	NA	0.875
scaffold_1:4146443-4146497	IR	0.678571	NA	NA	NA	NA	0.72	0.888889	NA	0.887097
scaffold_1:4152078-4152150	IR	NA	NA	NA	NA	0.909091	NA	NA	0.898734	0.909091
scaffold_1:4163220-4163294	IR	0.928571	1	1	1	1	1	1	0.992424	0.988764
scaffold_1:4171068-4171119	IR	1	1	1	1	1	1	0.999371	0.900533	0.765073
scaffold_1:4188302-4188348	IR	0.941497	1	0.989362	1	0.984615	0.970674	1	0.992063	0.97619
scaffold_1:4189360-4189391	A3SS	0.029724	0.184211	0.0294118	0.182648	0.249071	0.191083	0.11976	0.0524017	0.0913462
scaffold_1:4189360-4189391	A5SS	0.029724	0.184211	0.0294118	0.182648	0.249071	0.191083	0.11976	NA	0.0913462
scaffold_1:4189645-4189670	A3SS	0.864407	NA	0.736842	NA	NA	NA	NA	0.888889	NA
scaffold_1:4189645-4189670	A5SS	0.864407	0.923077	0.736842	NA	NA	0.94	0.962264	0.888889	0.884615
scaffold_1:4189650-4189670	A3SS	NA	0.413793	0.112903	NA	NA	0.34058	0.455357	0.161616	0.175573
scaffold_1:4189650-4189670	A5SS	NA	0.413793	0.112903	0.514286	0.513393	0.34058	0.455357	0.161616	0.175573
scaffold_1:4189706-4189786	AltEnd	0.68005	0.6	0.891473	NA	NA	0.666667	0.552632	0.841584	0.828358
scaffold_1:4189706-4189786	AltStart	0.68005	0.6	0.891473	NA	NA	0.666667	0.552632	0.841584	0.828358
scaffold_1:4189706-4189847	A3SS	0.68005	0.6	0.891473	0.505556	0.491228	0.666667	0.552632	0.841584	0.828358
scaffold_1:41964-42019	IR	0.105634	0	0	0.025974	0.0689655	0.0440678	0.0373832	0.0264901	0.0103627
scaffold_1:4231228-4231237	A5SS	1	1	1	0.994728	0.991817	0.953488	0.995283	0.944681	0.857143
scaffold_1:4231286-4231301	A3SS	0	0	0	0.00527241	0.00818331	0.0465116	0.00471698	0.059322	0.142857
scaffold_1:4240629-4240687	IR	0.318182	0.8125	0.71831	0.712389	0.595092	0.702941	0.823232	0.5	1
scaffold_1:4241010-4241016	A5SS	NA	NA	0.982759	NA	NA	NA	0.938776	NA	NA
scaffold_1:4244281-4244359	IR	0.233533	0	0.142857	0.216	0.283582	0.33526	0.156757	0.195652	0.0508475
scaffold_1:4244562-4244632	IR	0.00921659	0	0	0.0414938	0.0454545	0.0536585	0.0462428	0.0136364	0
scaffold_1:4245334-4245344	A3SS	NA	NA	NA	0.0484848	0.026738	NA	NA	0.0542169	NA
scaffold_1:4245613-4245668	IR	1	1	1	NA	0.939516	0.996656	0.99631	0.866171	0.949153
scaffold_1:4245835-4245898	A5SS	NA	NA	NA	NA	0.96129	NA	NA	0.943262	0.913793
scaffold_1:4246082-4246144	IR	0.139706	NA	0.24	0.175439	0.128571	0.175926	0.169014	NA	0.136364
scaffold_1:431427-431479	IR	0.684211	0.954545	0.783784	0.910112	0.868966	0.831169	0.742268	0.612745	0.584507
scaffold_1:44137-44233	IR	NA	NA	0.3	0.349558	0.345924	0.224462	0.210402	0.213873	0.227484
scaffold_1:44340-44462	IR	0.142857	0.1	0.025641	0.0397351	0.0438066	0.0399027	0.0271382	0.0381356	0.0317058
scaffold_1:45611-45695	A5SS	0	0	0.0491803	0.057187	0.0487616	0.0368339	0.0324675	0.0282051	0.0664298
scaffold_1:45611-45887	IR	0.148148	0	0.0333333	0.0491284	0.044164	0.0630631	0.04	0.0212202	0.0643472
scaffold_1:456916-457231	IR	0.0502318	0.137405	0.0757576	0.425573	0.386005	0.275124	0.618627	0.423767	0.559758
scaffold_1:460559-460618	IR	0.89047	1	0.987179	0.962825	0.97973	0.954955	0.977925	0.980993	0.977985
scaffold_1:46287-46339	IR	0.0333333	NA	0.140845	NA	NA	NA	NA	NA	NA
scaffold_1:466235-466290	IR	0.94	1	0.990566	0.989646	0.998856	0.985632	1	0.983871	1
scaffold_1:470486-470495	A3SS	1	0.992537	1	1	1	1	1	0.985294	0.88162
scaffold_1:470546-470569	A5SS	0	0.00746269	0	0	0	0	0	0.0147059	0.115625
scaffold_1:479160-479230	IR	0	0	0.153846	0.0589971	0.0538721	0.105469	0.21148	0.283784	0.470588
scaffold_1:483340-483374	A3SS	NA	0.888889	NA	0.0298507	0.0277778	NA	NA	0.242647	0.0785908
scaffold_1:483422-483466	A5SS	NA	NA	NA	NA	NA	NA	0.8	NA	0.166667
scaffold_1:483422-483471	IR	1	NA	1	0.993711	0.987842	1	0.996317	0.895911	0.969734
scaffold_1:483471-483529	A3SS	NA	NA	NA	NA	NA	NA	0.2	NA	0.833333
scaffold_1:491426-491481	IR	0.875	NA	NA	0.996947	0.994612	0.992936	NA	NA	NA
scaffold_1:494417-494531	A5SS	NA	NA	NA	0.611111	0.576923	0.987179	0.535714	0.159091	0.636364
scaffold_1:494417-494559	Cassette	NA	NA	NA	NA	NA	NA	0.986842	0.860262	NA
scaffold_1:494531-494532	Cassette	NA	NA	NA	0.916667	0.980392	NA	0.983607	0.825328	0.925926
scaffold_1:499093-499108	A3SS	0.036036	0	0.0542636	0.0276923	0.0283912	0.0471014	0.0517241	0.0276753	0.0332717
scaffold_1:511492-511520	A3SS	NA	NA	NA	NA	NA	NA	NA	0.416667	0.625
scaffold_1:516955-516968	A3SS	NA	NA	NA	NA	NA	NA	NA	0.00483871	0.0921053
scaffold_1:517008-517019	A5SS	NA	NA	NA	NA	NA	NA	NA	0.995161	0.906667
scaffold_1:530066-530095	A3SS	0.794821	0.421053	0.5	0.42246	0.395062	0.539286	0.518283	0.402027	0.485075
scaffold_1:53247-53266	A5SS	0.05	0.576923	0.116667	0.0708661	0.0808081	0.0872483	0.0236967	0.0888889	0.326923
scaffold_1:53307-53320	A3SS	NA	0.423077	0.881356	0.928571	0.918367	0.907801	0.97561	0.909091	0.666667
scaffold_1:53311-53320	A3SS	0.555556	0	0.125	0.1	0.111111	0.380952	0.545455	0.2	0.0555556
scaffold_1:651377-651389	A3SS	0.0222222	0	0	0	0	0	0	0.00628931	0.214286
scaffold_1:651432-651502	A5SS	NA	NA	NA	NA	NA	NA	NA	0.996855	0.948276
scaffold_1:651432-651507	A5SS	0.978723	1	1	1	1	1	1	NA	0.820896
scaffold_1:660302-660371	IR	NA	NA	NA	0	NA	NA	NA	0.0299401	0.103448
scaffold_1:668210-668273	IR	0.236364	0	0.0273973	0.169014	0.0333333	0.0847458	0	0.0460526	0
scaffold_1:677437-677446	A5SS	1	1	0.666667	0.479592	0.443548	0.57037	0.457447	0.671875	0.784946
scaffold_1:677487-677502	A3SS	0	0	0.333333	0.520408	0.556452	0.433824	0.544974	0.328125	0.239583
scaffold_1:677517-677525	A5SS	1	1	0.619048	0.57732	0.483051	0.593985	0.477011	0.689076	0.802326
scaffold_1:677565-677579	A3SS	0	0	0.380952	0.42268	0.516949	0.406015	0.522989	0.310924	0.197674
scaffold_1:680085-680134	IR	0.151163	0.351852	0.2	0.332	0.276786	0.285546	0.396313	0.301408	0.355556
scaffold_1:680142-680155	A3SS	0.975391	0.939394	0.954861	0.868293	0.883895	0.841874	0.88724	0.931973	0.970588
scaffold_1:680155-680203	IR	0.00909091	0.03125	0.0178571	0.0531915	0.0634921	0.0384615	0.0567823	0.0486111	0
scaffold_1:681102-681155	IR	1	1	0.992754	0.990521	0.991416	0.976096	0.967742	1	0.875
scaffold_1:701314-701626	AltEnd	0.909091	NA	NA	1	NA	NA	NA	NA	NA
scaffold_1:704136-704875	AltEnd	0.944444	NA	NA	1	NA	NA	NA	NA	NA
scaffold_1:706287-706340	IR	0.0158103	0.0555556	0	0.157895	0.142857	0.027027	0	0	0.00453858
scaffold_1:707496-707579	IR	NA	1	0.882353	1	0.947368	0.888889	0.571429	0.375	0.583333
scaffold_1:716418-716475	IR	0.689655	0.666667	0.666667	0.632353	0.795455	0.842105	0.377049	NA	NA
scaffold_1:722389-722396	A3SS	0.610169	0.8	0.8	0.827338	0.841772	0.826772	0.826087	0.768519	0.740157
scaffold_1:749339-749361	Cassette	NA	NA	NA	0.666667	NA	0.482759	NA	0.428571	NA
scaffold_1:751236-751249	A3SS	0.439024	0.133333	0.0823529	0.18107	0.202703	0.40708	0.449275	0.308989	0.141414
scaffold_1:751236-751249	A5SS	0.439024	0.133333	0.0823529	0.18107	0.202703	NA	NA	NA	0.141414
scaffold_1:751297-751317	A3SS	0.638889	0.866667	0.917647	0.81893	0.815668	NA	NA	NA	0.876289
scaffold_1:751297-751317	A5SS	NA	0.866667	0.917647	0.81893	0.815668	0.623256	NA	0.736527	0.876289
scaffold_1:751297-751319	A5SS	0.884615	1	1	1	0.994382	0.943662	0.890625	0.946154	1
scaffold_1:755226-755286	IR	0.948276	NA	NA	0.973333	NA	NA	0.971429	0.974359	NA
scaffold_1:757197-757255	IR	0.047619	0	0.0419287	0.184211	0.174567	0.109304	0.155537	0.10661	0.147826
scaffold_1:773449-773469	A5SS	0	0	0.0307692	0.0273224	0.0526316	0.127907	0.00961538	0.0533981	0.0277778
scaffold_1:773449-773473	A5SS	0	0	0.0869565	0.148325	0.12	NA	0.141667	0.0758294	0.102564
scaffold_1:773515-773528	A3SS	1	1	0.887324	0.839623	0.849785	0.742574	0.858333	0.886364	0.875
scaffold_1:776162-776218	IR	0.0367985	0.028436	0.0568986	0.0292398	0.0368315	0.0291404	0.0401826	0.0664629	0.0769231
scaffold_1:802833-803013	A5SS	NA	NA	NA	0.851064	0.794118	NA	NA	NA	NA
scaffold_1:804407-804420	A3SS	NA	1	0.885246	0.977941	0.932939	NA	NA	0.97446	NA
scaffold_1:804407-804420	A5SS	0.922156	1	0.885246	0.977941	NA	0.857708	0.980315	0.97446	0.883721
scaffold_1:804464-804491	A3SS	0.0778443	0	0.114754	0.022113	NA	0.142292	0.019685	0.0255906	0.116279
scaffold_1:804856-804924	IR	0.0890411	0.2	0.45122	0.174672	0.130909	0.180952	0.221918	0.249201	0.311828
scaffold_1:805236-805292	A3SS	0.946429	0.833333	0.84375	0.790698	0.89313	0.833333	0.953125	0.872093	0.836735
scaffold_1:805236-805292	A5SS	0.946429	0.833333	0.84375	0.790698	0.89313	0.833333	0.953125	0.872093	0.836735
scaffold_1:805310-805364	A3SS	0.0363636	0.166667	0.16129	0.207317	0.107692	0.169811	0.0396825	0.117647	0.147368
scaffold_1:805310-805364	A5SS	0.0363636	0.166667	0.16129	0.207317	0.107692	0.169811	0.0396825	0.117647	0.147368
scaffold_1:805659-805792	A3SS	0	NA	NA	NA	0.285714	NA	NA	NA	NA
scaffold_1:805720-805800	AltStart	0.877551	1	1	0.95279	0.937107	0.975694	0.989247	1	1
scaffold_1:805848-805860	A5SS	NA	1	0.933333	1	0.95092	1	1	1	NA
scaffold_1:805848-805889	A3SS	0.62585	0.619048	0.264151	0.467811	0.487421	0.496528	0.252688	NA	NA
scaffold_1:805957-805976	A3SS	NA	NA	0.225806	NA	NA	NA	NA	NA	0.368932
scaffold_1:805957-805976	A5SS	NA	NA	0.225806	NA	NA	NA	NA	NA	0.368932
scaffold_1:806185-806215	A3SS	0.0769231	NA	NA	NA	0.046729	0.0208333	NA	0.131222	0.183206
scaffold_1:806185-806215	A5SS	NA	0.1	0.06	0.030303	NA	NA	0.0753138	0.131222	0.183206
scaffold_1:806510-806517	A3SS	NA	0.0909091	0.0465116	0.0614754	0.037037	0.058309	0.0630631	0.0259259	0.0682927
scaffold_1:806510-806517	A5SS	0.116564	0.0909091	0.0465116	0.0614754	0.037037	0.058309	0.0630631	0.0259259	0.0682927
scaffold_1:833957-833962	A3SS	0.389105	0.129032	0.130435	0.209877	0.150376	0.177778	0.294118	0.217949	0.167702
scaffold_1:838846-838884	A5SS	0.947368	0.857143	0.891892	0.92053	0.8875	0.857143	0.881579	0.983471	0.87931
scaffold_1:842063-842072	A3SS	0.198582	0.25	0.170909	0.160685	0.152109	0.149657	0.157924	0.160558	0.128205
scaffold_1:842063-842072	A5SS	0.198582	0.25	0.170909	0.160685	0.152109	0.149657	0.157924	NA	0.128205
scaffold_1:851692-851781	IR	0.272727	0.230769	0.28	0.1	0.0357143	0.0615385	0.253012	0.45	0.226562
scaffold_1:857568-857624	IR	0.678261	0.733333	0.861702	0.977273	0.961111	0.831933	0.919708	0.901961	0.859076
scaffold_1:861488-861497	A3SS	0.97541	1	0.931677	0.927273	0.938462	0.924832	0.969953	0.962519	0.956392
scaffold_1:876539-876599	Cassette	NA	NA	NA	1	0.916667	NA	0.964286	0.970588	0.571429
scaffold_1:876786-876803	A5SS	NA	NA	0.333333	0.846154	0.928571	0.875	0.75	0.571429	NA
scaffold_1:899607-899678	IR	0.144509	0.133333	0.00395257	0.0197044	0	0.0227273	0.0246914	0.00851064	0.0181818
scaffold_1:914117-914169	IR	0.510172	0.884615	0.920415	0.859175	0.8815	0.862271	0.810568	0.831065	0.789226
scaffold_1:926485-926559	IR	0.947368	1	0.972222	0.909836	0.987421	0.923414	0.932432	0.952663	0.962617
scaffold_1:929361-929419	IR	0.183099	0	0.521739	0.121212	0.0851064	0.127907	0.0421053	0.102941	0.152542
scaffold_1:959426-959439	A3SS	0.105263	0.0434783	0.0234192	0.0538922	0.0585683	0.0473684	0.0526316	0.040404	0.0540541
scaffold_1:972824-972839	A3SS	NA	NA	NA	NA	NA	NA	0.0393701	0.0324324	0.148936
scaffold_1:976511-976588	IR	0.0833333	0	0.0272374	0.166667	0.140665	0.0868545	0.256586	0.089701	0.06
scaffold_1:976511-976766	IR	0.155556	0.0555556	NA	NA	NA	NA	NA	NA	NA
scaffold_1:976588-976617	Cassette	NA	NA	0.78135	0.831905	0.806211	0.784353	0.819068	0.842697	0.889724
scaffold_1:976617-976766	IR	NA	0.222222	NA	NA	NA	0.182952	NA	NA	NA
scaffold_1:978188-978255	Cassette	0	0	0.0108696	0.08159	0.0493097	0.0128755	0.0426065	0	0
scaffold_1:986515-986570	IR	0.938272	0.833333	0.982143	0.991561	0.991223	0.986842	0.987395	0.990579	0.985401
scaffold_1:986515-986573	IR	0.894118	NA	NA	0.992537	NA	0.995575	NA	0.990528	0.992593
scaffold_1:995340-995355	A3SS	0.9375	NA	0.967742	0.865672	0.932203	0.884615	0.909091	0.96	NA
scaffold_1:999920-999973	IR	0.0142857	0	0.0277778	0.0368664	0.0696721	0.0842697	0.0688623	0.0384615	0.0583333
scaffold_10:1049772-1049831	IR	0.0362319	0.8	0.54386	0.349515	0.4	0.296296	0.333333	0.186207	0.195122
scaffold_10:1054140-1054388	IR	0.0322581	0.0487805	0.0314961	0.0289715	0.0368737	0.0969388	0.046798	0.0413851	0.0457107
scaffold_10:1058526-1058536	A3SS	NA	NA	NA	0.318182	0.545455	NA	NA	NA	NA
scaffold_10:1058548-1058567	A5SS	NA	NA	NA	0.666667	0.857143	NA	NA	NA	NA
scaffold_10:1063644-1063706	IR	0.015625	0.125	0.00966184	0.0314637	0.0278261	0.034965	0.0154799	0.0108225	0.0302013
scaffold_10:1065219-1065229	A5SS	0.0555556	0	0.0186047	0.0380228	0.0902256	0.0337079	0.0630631	0.0357143	0.0751445
scaffold_10:1073784-1073947	A5SS	NA	NA	NA	0.888889	1	NA	NA	NA	NA
scaffold_10:1076508-1076567	IR	0.116751	0	0.140351	0.0420792	0.0503597	0.0858726	0.135802	0.0781893	0.0833333
scaffold_10:1078658-1078743	IR	1	NA	NA	NA	NA	NA	NA	0.9375	NA
scaffold_10:1080889-1080900	A3SS	NA	NA	NA	0.285714	NA	NA	NA	0.171429	NA
scaffold_10:1086668-1086693	A3SS	NA	NA	NA	NA	NA	0.5	0.222222	NA	NA
scaffold_10:1086778-1086842	IR	0.0562249	0.0112749	0.00515907	0.0369881	0.0268595	0.0456631	0.0137741	0.00846024	0.0162455
scaffold_10:1089251-1089297	A5SS	0.958549	NA	0.965812	0.987013	0.985149	0.978723	NA	0.958333	0.909091
scaffold_10:1089306-1089347	A3SS	0.0414508	NA	0.034188	0.012987	0.0148515	0.0212766	NA	0.0416667	0.0909091
scaffold_10:1112951-1112969	A3SS	0	0	0	0.00418994	0.0102941	0.00315789	0.0034188	0.0808824	0.075
scaffold_10:1113011-1113049	A5SS	1	1	0.994382	0.987535	0.989706	0.995794	0.989813	0.912409	0.925
scaffold_10:1114828-1114960	A3SS	0.958904	0.625	NA	NA	NA	NA	NA	NA	NA
scaffold_10:1117432-1117485	IR	0.0864198	0.214286	0.0763359	0.0873786	0.0673077	NA	0.145833	0.09375	0.134615
scaffold_10:1117549-1117601	IR	0.0638298	0	0.00952381	0.0113636	0.0350877	0.0425532	0.00719424	0.03125	0.0272109
scaffold_10:1127802-1127815	A3SS	0.567961	0.697674	0.868805	0.816239	0.808176	0.805461	0.764103	0.861789	0.833333
scaffold_10:1137804-1137861	A3SS	0.666667	0.516129	0.601604	0.658915	0.610596	0.655844	0.815152	0.813283	0.793622
scaffold_10:1158255-1158321	IR	0.125	0.113636	0.0330033	0	0.244444	0.0931373	0.043956	0.122066	0.027027
scaffold_10:1161538-1161588	IR	NA	NA	NA	0.955556	1	0.936508	NA	0.935484	0.891892
scaffold_10:1188001-1188020	Cassette	1	NA	NA	0.0909091	0.214286	NA	0.111111	NA	1
scaffold_10:1196113-1196177	IR	0.0804598	0.384615	0.0925926	0.492647	0.402844	0.473684	0.412698	0.241935	0.191176
scaffold_10:1198187-1198248	IR	0.65625	0.904762	0.813008	0.833119	0.785614	0.8429	0.841705	0.777512	0.751323
scaffold_10:121304-121351	IR	NA	NA	NA	0.8	NA	1	NA	NA	NA
scaffold_10:123542-123554	A3SS	0.125	NA	NA	NA	NA	NA	NA	0	NA
scaffold_10:125386-125429	A3SS	NA	NA	NA	NA	NA	NA	NA	0.243243	1
scaffold_10:125462-125488	A5SS	NA	NA	NA	NA	NA	NA	NA	0.756757	0.142857
scaffold_10:1259381-1259391	A5SS	1	1	0.982143	1	1	1	1	1	0.703125
scaffold_10:1259435-1259446	A3SS	0	0	0.0178571	0	0	0	0	0	0.296875
scaffold_10:1260513-1260525	A3SS	0.763158	0.367347	0.384615	0.348018	0.311573	0.37037	0.641135	0.705036	0.606299
scaffold_10:1260513-1260525	A5SS	0.763158	NA	NA	NA	NA	NA	NA	0.705036	NA
scaffold_10:1277462-1277519	IR	0.910256	1	0.987179	0.99845	0.991582	0.983553	0.993197	0.926641	0.970588
scaffold_10:1277591-1277602	Cassette	0.714286	0.833333	NA	NA	0.894886	0.752941	0.765487	0.112782	NA
scaffold_10:1278440-1278449	A3SS	NA	0.0666667	0.0754717	0.0108696	0.00292398	0.010989	0.00952381	0.0245902	0.0833333
scaffold_10:1294328-1294396	IR	0.00617284	0	0.0606061	0.0636704	0.0660377	0.130926	0.102564	0.0110619	0.111111
scaffold_10:1305544-1305635	IR	0.942857	NA	NA	0.863636	0.88	0.84	0.969697	0.925	0.969697
scaffold_10:1311665-1312203	IR	0.0263852	0.428571	0	0.0188679	0.0232558	0.163462	0.025641	NA	0.0765864
scaffold_10:1316043-1316108	IR	0.666667	NA	0.0821918	NA	NA	NA	NA	NA	NA
scaffold_10:1316227-1316399	IR	0.4	0	0.015625	0.0466321	0.01341	0.0516432	0.0598504	0.0523504	0.0431034
scaffold_10:1316688-1316741	IR	0.130435	0	0	0.0194175	0.0117371	0.0328698	0.0306905	0.0524017	0.00961538
scaffold_10:1323443-1323499	IR	0.114833	0.230769	0.176471	0.0819672	0.145455	0.214521	0.161572	0.107438	0.115385
scaffold_10:1332941-1332998	IR	0.4	0.3	0.35	NA	0.451796	NA	NA	0.364	0.293194
scaffold_10:1346968-1347039	IR	0.00306883	0	0.00925926	0.00481928	0.0189076	0.00689655	0.02589	0.0268657	0.12
scaffold_10:1355667-1355729	IR	0	0.1	0.0153846	0.0221328	0.0120919	0.00944669	0.015873	0.025	0.00889988
scaffold_10:1357877-1357931	IR	0.0352941	0.0869565	0.0238095	0.0159363	0.0282686	0.0224215	0.0238095	0.0132231	0.00847458
scaffold_10:1358068-1358221	IR	0.137405	0.347826	0.212121	0.296089	0.297521	0.25	0.289593	0.311512	0.330808
scaffold_10:137908-137930	A3SS	NA	NA	NA	0.984615	0.9875	0.956938	0.983871	0.833333	0.970588
scaffold_10:1448944-1448996	IR	0.911392	0.978261	1	0.985507	0.985294	0.983819	0.982955	0.974522	0.95
scaffold_10:1453538-1453557	A3SS	0.827957	NA	1	0.996997	1	1	1	1	1
scaffold_10:1453538-1453557	A5SS	0.827957	1	NA	NA	NA	NA	NA	NA	NA
scaffold_10:1453593-1453619	A3SS	0.172043	0	NA	NA	NA	NA	NA	NA	NA
scaffold_10:1453593-1453619	A5SS	0.172043	NA	0	0.00302115	0	0	0	0	0
scaffold_10:1466495-1466845	IR	0.058363	0.024024	0.00725745	0.021014	0.0274218	0.0363699	0.0592164	0.0809206	0.0530267
scaffold_10:1477482-1477503	A5SS	0.017094	0.125	0.0192308	0.0148331	0.00642398	0.0168539	0.00969828	0.00195695	0
scaffold_10:1478183-1478245	IR	0.111111	0.333333	0.236111	0.287599	0.280519	0.388471	0.529825	0.167401	0.136364
scaffold_10:1478500-1478580	IR	0.159091	NA	0.0697674	0.202899	0.217195	NA	NA	0.230159	0.148148
scaffold_10:148133-148211	IR	NA	NA	0.891892	NA	0.964912	NA	NA	0.988189	0.983087
scaffold_10:1486415-1486430	Cassette	0.583333	NA	NA	0.69863	NA	NA	NA	NA	NA
scaffold_10:1516311-1516384	IR	0.0697674	NA	0.363636	0.0862069	0.0549451	0.049505	0.0805687	0.0277778	0.226667
scaffold_10:1531075-1531132	IR	0.966997	0.789474	0.838428	0.925311	0.897638	0.907027	0.99115	0.941606	0.948718
scaffold_10:1536833-1536887	IR	0.0596026	0.0869565	0.0361446	0.0319917	0.0351064	0.0559441	0.106952	0.105882	0.06
scaffold_10:1539285-1539292	A5SS	0.88092	0.983333	0.985294	0.905405	0.917098	0.862069	0.963719	0.972826	0.968254
scaffold_10:1550650-1550662	A5SS	NA	NA	NA	NA	NA	0.936709	1	NA	1
scaffold_10:1554621-1554772	IR	NA	NA	NA	NA	0.785714	0.684211	NA	NA	NA
scaffold_10:1574834-1574969	IR	0.244726	0.236842	0.145038	0.198036	0.172043	0.124682	0.149038	0.0802292	0.109589
scaffold_10:1576445-1576509	IR	NA	NA	NA	NA	NA	0.0828471	NA	0.0302433	NA
scaffold_10:1584244-1584300	IR	0.209756	0	0.3	0.277778	0.276265	0.194737	0.32	0.369949	0.354839
scaffold_10:1592456-1592467	A5SS	NA	NA	NA	0.0625	0.0273973	0.08	0.0263158	NA	NA
scaffold_10:1606770-1606791	A3SS	0.73516	NA	NA	NA	NA	0.666667	NA	0.714286	NA
scaffold_10:1607316-1607490	IR	0.0110457	0.125	0.169014	0.301961	0.264615	0.141548	0.359012	0.296912	0.365714
scaffold_10:1621116-1621125	A3SS	NA	0.938776	0.969231	0.981928	0.974659	0.982036	0.955801	0.969565	0.979798
scaffold_10:1628794-1628854	IR	0.8	0.333333	0.701299	0.83121	0.878873	0.852113	0.925094	0.935982	0.934211
scaffold_10:1628843-1628854	A3SS	NA	NA	NA	0.0862069	NA	0.192308	0.2	NA	NA
scaffold_10:1628843-1628854	A5SS	NA	NA	NA	0.0862069	NA	0.192308	0.2	NA	NA
scaffold_10:1633395-1633481	IR	1	1	0.621622	0.631068	0.884211	0.554054	0.416	0.357143	0.294737
scaffold_10:1634804-1634855	IR	1	1	1	0.995177	0.992347	0.99958	0.999097	0.945525	0.863636
scaffold_10:1642064-1642146	A5SS	NA	NA	NA	0.932773	NA	NA	0.971698	NA	NA
scaffold_10:164766-164787	A5SS	0.09375	0.222222	0.210526	0.124294	0.129187	0.0869565	0.149254	0.118881	0.149733
scaffold_10:167628-167712	IR	0.00806452	0.027027	0.0171946	0.0390738	0.0386792	0.030837	0.035443	0.0505166	0.0609272
scaffold_10:1702412-1702477	IR	0.0714286	0.0714286	NA	NA	NA	NA	NA	NA	NA
scaffold_10:1702531-1702607	IR	0.157895	0.266667	0.115385	0.200663	0.169811	0.167934	0.275716	0.101562	0.125
scaffold_10:1740950-1741161	IR	0.048913	0.15625	0.0349345	0.0318471	0.0288858	NA	0.0381356	NA	0.0320405
scaffold_10:1746266-1746395	IR	0.0412371	0.0909091	0.0149254	0.100376	0.0721533	0.0393701	0.0326087	0.0185874	0.00802139
scaffold_10:1769415-1769459	A3SS	0.846154	NA	NA	NA	NA	NA	NA	NA	0.428571
scaffold_10:1788211-1788269	IR	0.00952381	0	0.0731707	0.032967	0.0226244	0	0.0855457	0.0132013	0
scaffold_10:1833261-1833269	A3SS	NA	NA	NA	0.0681818	NA	0.318182	0.189189	NA	NA
scaffold_10:1835767-1835822	IR	0.717949	1	1	0.959459	0.979167	0.983471	1	1	1
scaffold_10:1842184-1842235	IR	NA	NA	NA	NA	1	1	NA	0.923077	NA
scaffold_10:1845631-1845703	IR	NA	0.9	0.990741	0.961538	0.917526	0.954082	0.983871	0.946903	0.869565
scaffold_10:188769-188820	A5SS	NA	NA	0	0.0808081	0.171429	NA	0.1	NA	NA
scaffold_10:1888490-1888527	Cassette	0.04375	NA	0.057971	0.0125	0.015873	0.0189394	0.0097561	0.00927644	NA
scaffold_10:1888490-1888652	A3SS	NA	0.222222	0.056338	NA	NA	0.0189394	NA	0.00925926	NA
scaffold_10:1888880-1888918	A5SS	0.964912	0.954545	0.993333	0.938776	0.84715	0.982249	0.904014	1	0.991736
scaffold_10:1888934-1888967	Cassette	0.0295858	0	0.00666667	0.0584795	0.155039	0.0177515	0.079929	0	0.00826446
scaffold_10:1888934-1888988	A3SS	0.0295858	NA	0.00666667	0.0639535	NA	0.020649	NA	0	0.00826446
scaffold_10:1889402-1889514	IR	0.994444	0.956522	0.984655	0.739554	0.677885	0.871667	0.729185	0.996748	0.976562
scaffold_10:1922267-1922280	A3SS	NA	NA	NA	0	0.125	NA	NA	0.166667	NA
scaffold_10:1926475-1926482	A3SS	0.511628	0.416667	0.575758	0.527027	0.692308	0.532468	0.518519	0.72449	0.607143
scaffold_10:1930310-1930359	IR	NA	NA	NA	0.999456	NA	NA	NA	0.9967	0.945455
scaffold_10:1932901-1932964	IR	0.153846	NA	0.0227964	0.0286344	0.0400572	0.090625	NA	0.0557421	0.0622407
scaffold_10:1933789-1933819	A3SS	1	NA	1	0.997085	0.993827	0.998706	NA	0.995079	0.783193
scaffold_10:1933789-1933819	A5SS	NA	1	NA	0.997085	0.993827	NA	0.999178	0.995079	0.783193
scaffold_10:1955633-1955676	A3SS	0	0.222222	0.025641	0.0894309	0.0747664	0.0487805	0	0	0
scaffold_10:1955722-1955746	A5SS	1	0.777778	0.974359	0.910569	0.925234	0.95122	1	1	1
scaffold_10:1978255-1978292	Cassette	NA	1	NA	NA	0.892015	0.984088	NA	NA	NA
scaffold_10:1980245-1980301	IR	NA	NA	NA	NA	0.0461538	NA	0.0704607	NA	NA
scaffold_10:1980431-1980795	Cassette	1	NA	NA	NA	0.903346	NA	NA	NA	NA
scaffold_10:1980526-1980795	Cassette	NA	NA	0.166333	0.0669523	NA	NA	0.187153	NA	NA
scaffold_10:1980731-1980795	Cassette	NA	NA	0.758841	NA	NA	0.953881	0.844513	1	1
scaffold_10:1980754-1980795	Cassette	NA	NA	NA	0.0699413	0.105454	0.430556	NA	NA	NA
scaffold_10:1983091-1983094	AltStart	0.998804	1	0.882353	0.95679	0.976471	0.952941	0.983333	0.969072	0.97561
scaffold_10:1983150-1983170	A3SS	0.998804	NA	0.882353	0.957576	0.976471	0.952941	0.983333	0.969072	0.97561
scaffold_10:1983443-1983458	A3SS	NA	1	0.956522	0.979757	0.984556	0.977444	0.912409	0.927184	0.94958
scaffold_10:1983443-1983458	A5SS	NA	NA	NA	NA	NA	0.977444	NA	0.927184	NA
scaffold_10:1993763-1993817	IR	0.0255864	0.0517241	0	0.0512821	0.0228898	0.0290089	0.0327103	0.0286944	0.0261364
scaffold_10:200070-200135	A3SS	1	1	1	0.948718	0.954545	0.816901	0.722772	0.721649	0.690476
scaffold_10:200136-200143	Cassette	0	0	0	0.075	0	0.309524	0.317757	0.247312	0.292683
scaffold_10:200274-200282	A3SS	NA	NA	NA	NA	0.0243902	NA	0.0672269	NA	0.0254237
scaffold_10:201730-201786	A5SS	NA	NA	NA	NA	NA	0.8	0.910256	NA	NA
scaffold_10:201785-201786	Cassette	0.0440835	NA	NA	NA	NA	NA	0.0414067	0.0557895	NA
scaffold_10:2034741-2034798	IR	0	0.0444444	0.0163934	0.0841924	0.0608108	0.0605613	0.0733652	0.0375	0.0357143
scaffold_10:2048190-2048218	A5SS	0.13245	0.285714	0	0	0	0	0.027027	0	0.0547945
scaffold_10:2048244-2048320	A3SS	0.935714	NA	NA	NA	NA	NA	NA	NA	0.971831
scaffold_10:2048244-2048383	Cassette	0.976987	0.909091	1	1	1	1	1	1	NA
scaffold_10:2054100-2054166	IR	0.266667	0	0.126582	0.0923567	0.146939	0.103261	0.283465	0.265823	0.375
scaffold_10:2060045-2060105	AltEnd	0.905028	0.961538	0.982955	0.97043	0.989501	0.961039	0.977612	0.957672	0.94
scaffold_10:2074974-2074994	A3SS	1	1	1	1	1	1	1	1	0.770492
scaffold_10:2075038-2075049	A5SS	0	0	0	0	0	0	0	0	0.229508
scaffold_10:2086797-2086857	IR	NA	NA	0.0186916	NA	0.0154044	NA	NA	NA	0.0656934
scaffold_10:2089088-2089158	IR	0.302374	0.594722	0.591292	0.509885	0.462247	0.527079	0.630245	0.44591	0.471591
scaffold_10:2097015-2097070	IR	0.961039	NA	0.9375	1	1	1	1	0.990654	1
scaffold_10:2099610-2099661	IR	1	0.943396	0.977612	0.969728	0.969598	0.947669	0.960909	0.983213	0.972816
scaffold_10:2126131-2126277	A5SS	NA	NA	0	0	0	NA	0	0.0653061	0
scaffold_10:2132096-2132177	IR	1	1	1	0.996139	1	1	0.996805	0.970046	0.923913
scaffold_10:2137336-2137390	A5SS	0.158621	0.0625	0.0405405	0.0144928	0.0558659	0.038961	0	0.0526316	0.0978261
scaffold_10:2137336-2137456	IR	0.146853	0	0.1125	0.139241	0.133333	0.132812	0.0852713	0.152941	0.14433
scaffold_10:2137582-2137647	IR	0.934783	NA	1	0.951613	0.969388	0.957672	NA	0.959677	0.967742
scaffold_10:2165099-2167281	A5SS	0.142857	0.289474	0.3	0.117647	0.0901288	0.208955	0.380645	0.428051	0.448598
scaffold_10:2167201-2167281	AltStart	NA	0.289474	0.3	0.117647	0.0901288	0.208955	NA	NA	NA
scaffold_10:2176759-2176787	A5SS	NA	NA	NA	0.113636	0.0515464	0.00574713	0.0295203	NA	NA
scaffold_10:2176809-2176842	A3SS	NA	NA	NA	0.886364	0.948454	0.994231	0.97048	NA	NA
scaffold_10:2184200-2184258	IR	0.930769	1	1	0.977099	0.987013	0.963437	0.974522	NA	0.983838
scaffold_10:2184212-2184258	IR	0.900415	1	0.987654	0.967871	0.972696	NA	NA	NA	0.98768
scaffold_10:2184739-2184789	IR	1	1	0.988095	0.994505	1	0.998302	0.996071	0.76378	0.985481
scaffold_10:2213804-2213809	A5SS	NA	NA	NA	NA	NA	NA	0.0526316	0.0337079	NA
scaffold_10:2213858-2213963	A3SS	0.24	0	0.0480769	0.254717	0.228448	0.30814	0.210526	0.0898876	0.0434783
scaffold_10:2222281-2222459	A3SS	0.0546448	0.0588235	0	0.00594354	0.00363196	0.00828157	0.0124481	0.0202703	0
scaffold_10:2238330-2238394	IR	0.0289855	0.133333	0.0405405	0.0741935	0.0791789	0.107744	0.0927835	0.0244361	0.0753623
scaffold_10:2247348-2247354	A3SS	NA	NA	NA	0.166667	0	NA	NA	NA	NA
scaffold_10:225392-225407	A3SS	0.918919	NA	NA	NA	NA	NA	NA	0.998551	NA
scaffold_10:2262027-2262059	Cassette	0	0	0	0.0416667	0.0552632	0.003125	0.0102041	0.544762	0.291411
scaffold_10:2262116-2262344	A5SS	0	0	0	0.0416667	0.0551181	0.003125	0.0101695	0.542857	0.291411
scaffold_10:228244-228261	A3SS	NA	NA	0.941176	NA	NA	NA	NA	0.995984	NA
scaffold_10:2290909-2290967	IR	NA	NA	NA	NA	0.148844	NA	0.293987	NA	0.1
scaffold_10:2291594-2291636	A3SS	NA	NA	NA	1	1	1	1	1	0.9
scaffold_10:2295038-2295077	A5SS	NA	NA	NA	NA	NA	NA	0.981366	0.893333	NA
scaffold_10:2295077-2295138	IR	0.890244	0.890411	0.759615	0.743353	0.729358	0.809077	0.850662	0.680952	0.558201
scaffold_10:2295117-2295138	A3SS	NA	NA	NA	NA	NA	NA	0.0186335	0.106667	NA
scaffold_10:2298368-2298405	A3SS	NA	NA	NA	0.0384615	NA	0.134615	NA	NA	NA
scaffold_10:2304482-2304497	A5SS	NA	NA	NA	NA	NA	0.947368	0.87931	NA	NA
scaffold_10:2304538-2304547	A3SS	NA	NA	NA	NA	NA	0.1	0.135593	NA	NA
scaffold_10:2304746-2304764	A3SS	NA	NA	NA	NA	NA	NA	0.246575	0.705882	NA
scaffold_10:253042-253052	A5SS	0.65	0.714286	0.83871	0.775	0.927007	0.822222	0.848315	0.82906	0.961538
scaffold_10:260026-260046	A5SS	NA	NA	NA	0.0692308	NA	NA	0.00819672	NA	NA
scaffold_10:260086-260100	A3SS	NA	NA	NA	0.923077	NA	NA	0.991803	NA	NA
scaffold_10:266719-266724	A3SS	NA	NA	NA	0.047619	NA	NA	0.0645161	NA	NA
scaffold_10:269705-269726	A5SS	0.992806	NA	0.984252	NA	NA	0.995327	NA	NA	0.945578
scaffold_10:269764-269780	A3SS	0.00719424	0	0.015748	0.00139276	0.00135135	0.0046729	0.00263505	0	0.0544218
scaffold_10:27128-27281	A3SS	0.854839	0.555556	0.75	0.765799	0.732057	0.82906	0.829787	0.858156	0.858268
scaffold_10:28522-28592	IR	NA	1	0.9375	0.983607	0.9375	0.93617	0.886957	0.625	0.666667
scaffold_10:292314-292320	A3SS	0.8	0.73913	0.8	0.75	0.657143	0.786047	0.79021	0.882096	0.822581
scaffold_10:292879-292929	IR	NA	0.962963	0.95	0.939623	0.965649	NA	NA	NA	NA
scaffold_10:292879-292934	IR	0.918239	0.9	0.952381	0.932862	0.988593	0.94	0.939954	0.909739	0.914454
scaffold_10:296833-296863	A3SS	NA	NA	NA	NA	NA	NA	0.125	0.137255	NA
scaffold_10:296888-296935	A5SS	NA	NA	NA	NA	NA	NA	0.875	0.862745	NA
scaffold_10:298253-298307	IR	0.0102041	0	0	0	0	0.00655738	0.0300752	0	0.12
scaffold_10:298504-298577	IR	NA	1	1	1	NA	NA	NA	1	0.767089
scaffold_10:322655-322707	IR	0.014553	0.00666667	0	0.0239044	0.00990099	0.0142285	NA	0.0124481	0.0519481
scaffold_10:348224-348283	IR	0.117647	0.166667	0.0246914	0.0502092	0.047619	0.0204082	0.0882353	0.0437158	0.0526316
scaffold_10:357081-357141	IR	0.117647	0.0769231	0	0.0242424	0.0308789	0.0710059	0.0426667	0.0278422	0.0203304
scaffold_10:395538-395558	A3SS	0.933501	0.957895	0.992	0.992366	0.988864	0.981949	0.979557	0.992224	0.98801
scaffold_10:40754-40788	A3SS	NA	NA	0.727273	0.575	0.833333	0.773585	0.897436	0.863636	NA
scaffold_10:409245-409251	A3SS	NA	NA	NA	NA	NA	NA	NA	0.808511	0.666667
scaffold_10:420948-420962	A3SS	NA	NA	NA	NA	NA	0.0769231	0.608696	NA	NA
scaffold_10:420948-420983	A3SS	NA	NA	0.942857	0.990476	NA	0.937173	NA	0.995215	NA
scaffold_10:421016-421062	A5SS	NA	NA	NA	NA	NA	0	0.666667	NA	NA
scaffold_10:423103-423157	IR	0.0327869	0	0	0	0.0292398	0.0190476	0.0597015	0.00695652	0.0106038
scaffold_10:456495-456504	A3SS	0.1875	0.285714	0.297872	0.241135	0.304094	0.22956	0.24359	0.261398	0.312057
scaffold_10:467516-468051	A5SS	1	1	1	1	1	1	0.810811	1	1
scaffold_10:468119-468140	AltEnd	1	1	1	1	1	1	0.808743	1	1
scaffold_10:480387-480394	A3SS	NA	NA	NA	NA	0.949495	NA	0.939759	NA	NA
scaffold_10:490913-490946	A5SS	0.6	0.9	0.981818	1	1	1	1	0.996241	1
scaffold_10:490996-491004	A3SS	0.485714	0.1	0.0181818	0	0	0	0	0.011194	0
scaffold_10:521657-521663	A3SS	0.108844	0.444444	0.170543	0.1	0.153025	0.160377	0.121951	0.150838	0.0988506
scaffold_10:526468-526518	IR	0.557895	0.578947	0.2	0.269663	0.325648	0.394191	0.27809	0.348214	0.753623
scaffold_10:527085-527096	A3SS	0.817391	0.708333	0.905263	0.933929	0.892889	0.750663	0.905729	0.857143	0.595308
scaffold_10:527139-527155	A5SS	0.247059	0.466667	0.173077	0.134892	0.198305	0.4	0.165597	0.242744	0.536965
scaffold_10:527139-527158	A5SS	0.411765	0.4375	0.173077	NA	0.183673	0.401709	0.177442	0.259155	0.624434
scaffold_10:527760-527777	A3SS	0.190476	NA	0.333333	0.160714	NA	0.0666667	NA	NA	NA
scaffold_10:527822-527831	A5SS	0.809524	1	0.666667	0.839286	0.930556	0.934066	0.848485	0.897436	0.969072
scaffold_10:530050-530112	IR	0.305556	0.333333	0.736842	0.5	0.489362	0.697674	0.62	0.567568	0.578947
scaffold_10:530748-530800	IR	0.0952381	0	0.1	0.0833333	0.151515	0.08	0.338462	0.196078	0.0714286
scaffold_10:537352-537408	IR	0.307692	0.232558	0.0862069	0.0674157	0.155963	0.105263	0.115152	0.163793	0.5
scaffold_10:543961-544026	A5SS	0.938776	NA	0.988372	NA	NA	0.996198	0.997992	NA	0.998523
scaffold_10:568665-568778	IR	0.101449	0	0.0235294	0.0196078	0.0185449	0.0308989	0.0299824	0.369748	0.104575
scaffold_10:573930-573999	IR	0.36	0.5	0.789474	0.684211	1	0.568627	0.76	0.432494	0.40856
scaffold_10:575770-575833	IR	0.148438	0.111111	0.025	0	0.0597015	0.0784314	0.030303	0.0278777	0.0321285
scaffold_10:583141-583209	IR	0.938272	0.875	0.8	0.833333	0.763359	0.921875	0.940594	0.921569	1
scaffold_10:586371-586390	A5SS	0.34	0.333333	0.18	0.132193	0.129893	NA	0.140625	0.251397	0.598394
scaffold_10:586374-586390	A5SS	0.309091	0.428571	0.157895	0.140264	0.128295	0.435	0.133333	0.2267	0.512027
scaffold_10:586433-586444	A3SS	0.806818	0.785714	0.91	0.927773	0.930123	0.760989	0.925951	0.864662	0.618926
scaffold_10:592423-592491	IR	0.0726257	0.06	0.0150376	0.00918836	0.0147157	0.0298913	0.0318627	0.0432099	0.025
scaffold_10:597323-597334	A3SS	NA	NA	NA	0.75	NA	0.727273	0.789474	0.891892	NA
scaffold_10:597381-597398	A5SS	NA	NA	NA	0.25	NA	0.272727	0.210526	0.108108	NA
scaffold_10:605813-605868	IR	NA	NA	NA	NA	NA	0.0306122	NA	0.00529101	0.06
scaffold_10:612336-612347	A3SS	0.928571	1	1	0.978049	0.97619	0.978723	0.984615	0.992701	0.95122
scaffold_10:615284-615306	A3SS	NA	NA	NA	NA	0.988732	NA	0.986928	0.972222	0.927083
scaffold_10:616594-616674	AltStart	1	1	0.9	0.869159	NA	NA	0.857143	NA	0.934783
scaffold_10:616594-616783	A5SS	1	1	0.9	0.865116	0.748792	0.874074	0.847059	0.716667	0.914894
scaffold_10:622174-622229	IR	0.987179	0.666667	NA	0.966942	0.980645	NA	NA	NA	NA
scaffold_10:622401-622406	A3SS	0.897196	0.9	0.929293	0.91358	0.930851	0.941176	0.887006	0.920354	0.899083
scaffold_10:622401-622406	A5SS	0.897196	0.9	0.929293	0.91358	0.930851	0.941176	0.887006	NA	0.899083
scaffold_10:622406-622457	IR	0.142857	0	0.140187	0.150289	0.190698	0.524752	0.374502	0.203065	0.234375
scaffold_10:622946-622957	A3SS	0.568182	0.333333	0.76	0.582418	0.474576	0.617021	0.426087	0.728682	0.45977
scaffold_10:643216-643419	A3SS	0.0594595	0	0.0075188	0.0199501	0.024	0.034375	0.0367171	0.0213049	0.0182648
scaffold_10:647817-647917	IR	NA	NA	NA	0.833333	0.789474	NA	0.892857	NA	NA
scaffold_10:650517-650571	IR	0.857143	1	1	0.984848	0.962963	0.975	1	0.952	0.95
scaffold_10:664436-664623	A3SS	0.901333	1	1	0.979424	1	0.960094	0.996618	0.978916	1
scaffold_10:667619-667719	IR	0.165584	0.166667	0.117241	0.0949555	0.124722	0.138365	0.141553	0.163522	0.139241
scaffold_10:670303-670343	A5SS	NA	NA	0.916667	1	NA	NA	NA	NA	NA
scaffold_10:677928-677946	A3SS	NA	NA	NA	NA	1	1	0	NA	NA
scaffold_10:679353-679411	IR	NA	NA	NA	0.95	NA	1	0.923077	NA	NA
scaffold_10:696174-696240	IR	0.992424	0.933333	1	0.982639	0.974729	1	0.993333	0.952778	0.945
scaffold_10:696780-696890	IR	0.847059	1	1	0.916667	0.91954	0.909091	1	NA	0.860465
scaffold_10:698604-698674	IR	0.0190476	0	0.166667	0.0973451	0.111111	0.108527	0.136364	0.0851064	0.192308
scaffold_10:701522-701600	IR	NA	0	0	0.0338983	0.115702	0.0545455	0.0981308	0.0535714	0.115385
scaffold_10:701732-701891	IR	0.0784314	0.0526316	0.0416667	0.192	0.0909091	0.0331754	0.0597015	0.05	0.0178571
scaffold_10:701791-701891	A3SS	0.0208333	0	0	0.114035	0.0163934	0.00487805	0	0.0187793	0
scaffold_10:722841-722849	A3SS	NA	NA	NA	0	NA	NA	0.00111483	0.725	NA
scaffold_10:722901-722910	A5SS	NA	NA	NA	NA	NA	NA	0.998885	0.275	NA
scaffold_10:722988-723044	IR	NA	NA	NA	1	NA	NA	NA	0.656716	NA
scaffold_10:727735-727742	A3SS	0.0260492	0	0.0508475	0.0320197	0.0243506	0.035	0.0238095	0.0368764	0.0405405
scaffold_10:727735-727742	A5SS	0.0260492	0	0.0508475	0.0320197	0.0243506	NA	0.0238095	0.0368764	0.0405405
scaffold_10:736655-736705	IR	0.544444	0.933333	0.940741	0.896907	0.940541	0.912925	0.923833	0.943734	0.935065
scaffold_10:742459-742489	A3SS	0.870968	0.979167	1	1	1	0.976562	0.923077	0.896552	0.875
scaffold_10:742514-742547	A5SS	0.129032	0.0208333	0	0	0	0.0234375	0.0769231	0.103448	0.125
scaffold_10:750085-750115	A5SS	0.568966	0.0123457	0	0.0184049	0.0218978	0.0451128	0.027451	0	NA
scaffold_10:750169-750273	A3SS	0.583333	0.0121951	0	0.0181543	0.0215827	0.0451128	0.03125	0	0
scaffold_10:763897-763904	A3SS	1	1	0.94	1	0.925926	1	0.882353	0.944444	0.937255
scaffold_10:769701-769769	IR	0.00660264	0.0629921	0.0113636	0.015625	0.0131148	0.00617284	0.0302267	0.0220264	0.0365854
scaffold_10:769954-770007	IR	NA	NA	NA	NA	NA	NA	NA	0.794872	0.9
scaffold_10:770007-770035	A5SS	0.959538	NA	NA	NA	NA	0.909091	NA	NA	NA
scaffold_10:77219-77294	IR	0.101449	0.125	0.352273	0.531646	0.513889	0.325581	0.36	0.39924	0.777778
scaffold_10:782213-782271	IR	0.5625	NA	NA	NA	NA	NA	NA	NA	0.666667
scaffold_10:787597-787695	IR	0.835267	0.947368	0.957265	0.960938	0.962466	0.94864	0.987692	0.989418	0.992
scaffold_10:791834-791849	A3SS	0.441176	1	NA	NA	0.992398	NA	0.988827	NA	NA
scaffold_10:791834-791849	A5SS	0.441176	1	0.997537	0.99376	0.992398	0.941176	0.988827	0.975779	0.965812
scaffold_10:791849-791902	IR	0.814815	0	0.0402844	NA	0.047777	0.219512	0.157518	NA	NA
scaffold_10:791885-791902	A3SS	0.464286	0	0.00246305	0.00625489	0.0089779	0.0588235	NA	0.0375427	0.0423729
scaffold_10:791885-791902	A5SS	0.464286	0	NA	NA	0.0089779	NA	0.0112045	NA	NA
scaffold_10:802018-802085	IR	0.0707965	0.125	0.114286	0.157068	0.114833	0.11336	0.518519	0.489039	0.393602
scaffold_10:807402-807409	A3SS	0.925	1	0.984848	0.982456	0.978	0.987013	0.979112	0.983871	0.973684
scaffold_10:812152-812168	A3SS	NA	NA	NA	NA	NA	0.111111	NA	0	NA
scaffold_10:818761-818784	A5SS	0.514286	1	1	0.975	0.991643	0.993789	0.989035	0.963415	1
scaffold_10:818965-818982	A5SS	0.493827	1	1	0.990964	0.992401	0.986823	0.983963	0.966418	1
scaffold_10:819023-819058	A3SS	0.506173	0	0	0.00906344	0.00759878	0.0132353	0.016055	0.0335821	0
scaffold_10:819150-819156	A3SS	0.307692	NA	NA	NA	NA	NA	NA	0	NA
scaffold_10:829662-829675	A3SS	NA	NA	0.0384615	0.0189873	0.0481928	NA	0.107527	NA	NA
scaffold_10:832591-832604	Cassette	NA	NA	NA	NA	NA	0.996355	0.991899	NA	0.9
scaffold_10:832761-832820	Cassette	NA	NA	0.987952	0.988691	0.990835	0.995652	NA	NA	0.9375
scaffold_10:838810-838831	A3SS	NA	NA	0.1	NA	0.02	NA	0.0344828	0.0555556	0.147541
scaffold_10:851429-851480	A3SS	NA	NA	0.88	0.986486	0.980282	0.968586	NA	NA	0.913043
scaffold_10:851440-851480	A3SS	0.870968	1	NA	0.9701	0.980282	0.968586	NA	0.954338	0.954545
scaffold_10:851540-851551	A5SS	0.129032	0.153846	0.0909091	0.331148	0.235616	0.248731	0.337156	0.481818	0.458333
scaffold_10:853775-853784	A3SS	NA	NA	NA	0	NA	0	NA	0	0.08
scaffold_10:854909-854965	IR	0.110345	0.0148148	0.00561272	0.00577082	0.00586081	0.0234261	0.0135659	0.00904977	0.00627943
scaffold_10:862574-862627	IR	0.935484	1	0.99422	1	0.972973	0.963696	0.965174	0.988971	0.934426
scaffold_10:864936-865007	IR	0.375	0.222222	0.144231	0.160377	0.137931	0.113861	0.137615	0.134752	0.2
scaffold_10:876000-876009	A5SS	NA	NA	NA	0.0308642	NA	NA	0.0636943	0.024	NA
scaffold_10:880378-880420	A5SS	NA	NA	NA	0.117647	0.257143	NA	0.105263	NA	0.0584416
scaffold_10:880431-880478	A3SS	NA	NA	NA	0.714286	0.634146	NA	0.85	NA	0.923077
scaffold_10:882209-882256	IR	NA	NA	NA	0.666667	NA	NA	0.533333	NA	NA
scaffold_10:882256-882297	Cassette	NA	NA	NA	NA	NA	0.875	0.7	0.75	0.793103
scaffold_10:887178-887232	IR	0	0.111111	0.423077	0.0469799	0.0759494	0.0238095	0.208955	0.075	0.25
scaffold_10:894049-894117	IR	0.125	0.0181818	0.00869565	NA	NA	0.00957243	NA	0.00917431	0.0374332
scaffold_10:894254-894327	IR	0.0819672	0	0.00578035	0.00723639	0.00730994	0.010761	0.0042508	0	0
scaffold_10:896501-896533	A3SS	0.897059	NA	NA	0.9988	NA	NA	NA	NA	NA
scaffold_10:896551-896597	A5SS	0.102941	NA	NA	0.00119856	NA	NA	NA	NA	NA
scaffold_10:896921-896973	IR	NA	NA	NA	NA	NA	0.842105	1	NA	NA
scaffold_10:902409-902414	A3SS	0.0645161	NA	NA	0.0610687	NA	NA	NA	0.0592593	NA
scaffold_10:905495-905508	A3SS	0.7	0.357143	0.089701	0.290076	0.185629	0.411458	0.285714	0.227979	0.266234
scaffold_10:905495-905508	A5SS	0.7	NA	NA	NA	NA	0.411458	NA	NA	0.266234
scaffold_10:906274-906321	A3SS	NA	0.0714286	0.128205	0.170543	0.180212	NA	NA	NA	NA
scaffold_10:906274-906321	A5SS	0.316547	0.0714286	0.128205	0.170543	0.180212	0.180412	0.212996	0.168279	0.242525
scaffold_10:911219-911289	IR	0.0241838	0	0.04	0.100917	0.0771513	0.062201	0.121854	0.131045	0.0929791
scaffold_10:911750-911870	IR	0.0151261	0	0	0.078125	0.0947368	0.00639659	0.0313199	0.0752427	0.0523952
scaffold_10:91486-91543	IR	0.045977	0	0.0129032	0.0244755	0.0452489	0.0788177	0.100791	0.0286576	0.0294737
scaffold_10:91742-91791	IR	0.0947368	0.0588235	0.0709677	0.0310559	0.0643939	0.0474684	0.0605381	NA	0.0294785
scaffold_10:927505-927627	A3SS	NA	NA	NA	NA	0.952381	0.923913	0.910714	NA	NA
scaffold_10:929659-929667	A3SS	0.941176	1	1	0.981982	0.987261	0.988389	0.980645	0.987683	0.990953
scaffold_10:933779-933809	A5SS	0.880282	0.552632	0.877622	0.947067	0.948565	0.779783	0.924272	1	0.998607
scaffold_10:933833-933866	A3SS	0.119718	0.447368	0.122378	0.0529328	0.0480192	0.223827	0.0721248	0	0.00139276
scaffold_10:933956-934013	IR	0.841549	0.409639	0.892449	0.934545	0.969196	0.87931	0.934531	0.996944	0.999098
scaffold_10:935221-935233	A5SS	0.7	NA	NA	1	1	NA	1	NA	NA
scaffold_10:935246-935270	A3SS	0.3	NA	NA	0	0	NA	NA	NA	NA
scaffold_10:935246-935438	A3SS	0.5	NA	NA	NA	NA	NA	0	NA	NA
scaffold_10:935270-935301	A3SS	NA	NA	NA	NA	0.928571	NA	0.8	NA	NA
scaffold_10:947467-947506	A3SS	NA	NA	NA	NA	NA	0.7	0.860465	0.766667	NA
scaffold_10:947467-947522	A3SS	0.125	0.0235294	0.0029615	0.0142965	0.0146341	0.022082	0.0406147	0.0151216	0.028
scaffold_10:948123-948187	IR	NA	NA	NA	0.866667	1	NA	NA	0.909091	NA
scaffold_10:949591-949626	A5SS	NA	NA	NA	0.913043	NA	NA	NA	0.875	NA
scaffold_11:1018363-1018392	A3SS	NA	NA	NA	NA	0.375	0.758621	NA	0.5	0.166667
scaffold_11:1018363-1018392	A5SS	NA	NA	NA	NA	0.375	0.758621	NA	NA	NA
scaffold_11:1025262-1025321	IR	0.133333	0	0	0.00917431	0	0.0272873	0.0227273	0.05	0
scaffold_11:1032740-1032791	IR	0.2	0.285714	NA	NA	0.0690846	0.0891648	0.0895706	0.0166667	0
scaffold_11:1032821-1032881	IR	0.1	0.1875	0.141593	0.0640777	0.0690265	0.0938967	0.102767	0.0784314	0.0353535
scaffold_11:1039215-1039263	IR	NA	NA	NA	0.904762	1	0.888889	0.826087	NA	NA
scaffold_11:1045883-1045896	A5SS	0.774373	1	1	1	1	1	1	1	1
scaffold_11:1045938-1045949	A3SS	0.227778	0	0	0	0	0	0	0	0
scaffold_11:1049397-1049419	A5SS	NA	NA	NA	0.6	0.1	NA	NA	NA	NA
scaffold_11:1049468-1049481	A3SS	NA	NA	NA	0.4	0.875	NA	NA	NA	NA
scaffold_11:1058990-1059005	A3SS	0.201276	0.09	0.0321252	0.0675563	0.103393	0.0793737	0.0788064	0.0560224	0.0789474
scaffold_11:1061405-1061426	A5SS	NA	NA	NA	NA	NA	0.636364	0.625	NA	NA
scaffold_11:106306-106331	A5SS	NA	NA	NA	NA	0.9375	NA	NA	1	0.990859
scaffold_11:1091076-1091135	IR	1	1	0.787234	0.884774	0.887097	0.911765	0.888502	0.79798	0.890323
scaffold_11:1091127-1091135	A3SS	NA	NA	NA	NA	0.176471	0.153846	0.135135	NA	NA
scaffold_11:1104002-1104013	A5SS	0	NA	NA	0.0833333	0.444444	NA	NA	NA	0
scaffold_11:1116839-1116885	A5SS	0.638889	1	1	1	1	1	1	1	1
scaffold_11:1116931-1116944	A3SS	0.361111	0	0	0	0	0	0	0	0
scaffold_11:115321-115326	A3SS	0.288194	0.25	0.131579	0.0416667	0.150943	0.10274	0.219512	0.133929	0.233333
scaffold_11:1225073-1225141	IR	1	1	0.938776	0.980892	0.969697	0.965	0.968153	0.690763	0.829787
scaffold_11:1228831-1228953	IR	0.94051	0.952381	0.991667	0.997085	0.98801	0.98151	0.97651	0.984914	0.981221
scaffold_11:1232400-1232456	IR	0.791667	NA	0.972973	NA	0.809524	NA	0.993865	0.949721	0.953488
scaffold_11:1233082-1233097	A3SS	NA	NA	NA	NA	0.922078	0.977528	0.917526	0.785714	NA
scaffold_11:1237922-1237927	A5SS	0.994709	1	0.986239	0.960432	0.975078	0.944444	0.96	0.885714	0.893617
scaffold_11:1254440-1254546	IR	0.468085	0	0.2	0.374429	0.310757	0.340136	0.4625	0.322176	0.222222
scaffold_11:1254621-1254677	IR	0.166667	0.125	NA	0.0633803	NA	0.110236	0.153333	NA	NA
scaffold_11:1257515-1257528	A5SS	0.938053	0.986587	0.975888	0.988682	0.990583	0.993887	0.979294	0.966063	0.993421
scaffold_11:1273342-1273398	IR	0.875	0.157895	0.0446429	0.0576369	0.0210526	0.0352505	0.0516351	0.0706714	0.152542
scaffold_11:1273477-1273536	IR	0	0	0.0247934	0.00615385	NA	NA	NA	0.0188679	0.111111
scaffold_11:1282302-1282466	A3SS	0.28125	0.0833333	0.3125	0.64539	0.597701	0.605634	0.709677	0.61	0.676923
scaffold_11:1331122-1331198	IR	0.0714286	0.0222222	0.028777	0.0349435	0.0318896	0.0295226	0.0429668	0.0376652	0.0246036
scaffold_11:1331653-1332050	A5SS	NA	NA	NA	NA	NA	NA	0.05	NA	0.75
scaffold_11:1332222-1332302	AltStart	0	0.166667	0	0.00408163	NA	0.0127796	NA	NA	NA
scaffold_11:1332222-1332422	A5SS	NA	0.166667	NA	0.00406918	0.0013089	0.0127714	0.0030837	0.000185151	0.000478469
scaffold_11:134309-134371	IR	0.0955056	0	0.125	0.179856	0.185185	0.160377	0.106557	0.049505	0.174603
scaffold_11:1358842-1358901	IR	0.875	0.973333	0.998974	0.916256	0.940701	0.897727	0.979021	0.795666	0.679245
scaffold_11:1359290-1359343	IR	0.852941	1	0.997955	0.981818	NA	1	0.991525	0.98156	0.992883
scaffold_11:1359373-1359392	A3SS	0.904762	NA	NA	0.983871	0.993056	NA	NA	0.980769	0.979885
scaffold_11:1359440-1359466	A3SS	0.0952381	NA	NA	0.016129	0.00694444	NA	NA	0.0192308	0.0201149
scaffold_11:1359440-1359466	A5SS	0.0952381	NA	NA	0.016129	0.00694444	NA	NA	0.0192308	0.0201149
scaffold_11:1360302-1360365	IR	0.2	0.571429	0.346154	0.277778	0.305732	0.372414	0.259615	0.360544	0.359375
scaffold_11:1360604-1360656	IR	0.173913	0.857143	0.642857	NA	0.341085	0.312139	NA	0.333333	0.621622
scaffold_11:1368794-1368809	A5SS	NA	NA	NA	0.916667	NA	NA	NA	0.875	NA
scaffold_11:1369649-1369661	A3SS	NA	NA	1	NA	NA	1	0.982143	NA	0.000359712
scaffold_11:1382763-1382770	A5SS	1	0.866667	0.969231	0.983051	0.988669	0.987452	0.971897	0.910714	0.940828
scaffold_11:1383903-1383955	IR	0.894737	1	0.985075	0.990276	0.987879	0.98446	0.990403	0.97619	0.973684
scaffold_11:1389685-1389748	IR	NA	0	NA	NA	NA	NA	NA	NA	0.0550459
scaffold_11:1390607-1390665	IR	0.221311	0.375	0.116279	0.17284	0.131313	0.0921986	0.168675	0.0238095	0
scaffold_11:1393427-1393622	IR	0.166667	0.00934579	0.0454545	0.0984405	0.0937759	0.167708	0.143535	0.0758621	0.151442
scaffold_11:1397599-1397652	IR	0.998568	0.888889	0.846154	0.862745	0.829268	0.960573	0.967033	0.813953	1
scaffold_11:140354-140405	IR	0.3	0	0.0126263	0.0201841	0.0198413	0.0258144	0.0314534	0.020202	0
scaffold_11:1412020-1412077	IR	1	0.949153	0.986486	0.982558	0.977778	1	0.994949	0.972093	NA
scaffold_11:1414143-1414184	Cassette	0.161017	0.037037	0.017341	0	0.00262467	0.00824742	0.005	0.0539683	0.0583333
scaffold_11:1423410-1423466	IR	NA	NA	NA	0.153846	NA	NA	NA	0	NA
scaffold_11:1447512-1447642	IR	NA	NA	NA	NA	0.875	NA	0.940476	NA	NA
scaffold_11:1455208-1455345	A3SS	1	0.866667	0.914286	0.949153	0.959839	0.941935	0.988827	0.975155	0.992647
scaffold_11:1455208-1455371	A3SS	NA	NA	0.454545	NA	0.375	0.181818	NA	NA	NA
scaffold_11:1459599-1459648	IR	1	1	1	0.995169	0.993119	0.993664	0.99709	0.997732	0.762772
scaffold_11:1460278-1460290	A5SS	0.185185	NA	0	0	NA	NA	NA	0.00311042	NA
scaffold_11:1460340-1460359	A3SS	0.185185	0	0	0	0.00847458	0.00187617	0.0103359	0.00311526	0.371638
scaffold_11:1490784-1490847	IR	0.0628571	0.0140449	0.0063762	0.0196629	0.00775194	0.0459627	0.0162835	0.0213523	0.0121433
scaffold_11:1498362-1498479	A3SS	0	0	0	0	0.000475511	0	0	0.0398482	0.322862
scaffold_11:1498362-1498479	A5SS	0	0	0	NA	0.000475511	NA	0	0.0398482	0.322862
scaffold_11:1498523-1498534	A3SS	1	1	1	NA	0.999524	1	1	0.960152	0.677138
scaffold_11:1498523-1498534	A5SS	1	1	1	1	0.999524	1	1	0.960152	0.677138
scaffold_11:1516539-1516545	A5SS	NA	NA	0.153846	0.130435	NA	NA	NA	NA	NA
scaffold_11:1534567-1534582	A3SS	0.035461	0	0.00961538	0.0731707	0.0333333	0.0302115	0.0219298	0.0204918	0.0125786
scaffold_11:1545313-1545366	IR	0.0460299	0	0.00877193	0.0392157	0.0496	0.0749108	0.0440181	0.075431	0.0352941
scaffold_11:1578388-1578410	A5SS	NA	NA	NA	0.942029	0.984925	0.969072	0.988024	0.990698	0.975904
scaffold_11:1578453-1578463	A3SS	NA	NA	NA	0.057971	0.0150754	0.0309278	0.011976	0.00930233	0.0240964
scaffold_11:1586478-1586495	A5SS	0	0	0.0138889	0.0642202	0.0950704	0.0477612	0.064	0	0.0013245
scaffold_11:1586537-1586547	A3SS	1	1	0.986111	0.93578	0.90493	0.95231	0.935743	1	0.998679
scaffold_11:1607881-1607888	A3SS	0.646667	0.722222	0.637652	0.684466	0.703642	0.656613	0.606618	0.552821	0.587054
scaffold_11:1608647-1608728	IR	0.186047	0	0.0167364	NA	0.0282258	0.0393939	NA	NA	0.0895522
scaffold_11:1608705-1608728	A3SS	0.132231	0	0.00423729	NA	NA	NA	NA	NA	NA
scaffold_11:1609476-1609614	IR	0.0338983	0.0689655	0.0213675	0.0250696	0.00692042	0.0304183	0.0570175	0.0377778	0.047619
scaffold_11:1619405-1619483	IR	0.257353	0	0.108434	0.262484	0.23608	0.275374	0.235433	0.0460157	0.0754717
scaffold_11:1623609-1623614	A3SS	0.83871	0.928571	0.960784	0.926471	0.911111	0.922374	0.920863	0.95858	0.928889
scaffold_11:1631200-1631278	IR	0.96875	0.777778	0.982143	0.985915	0.977273	0.958095	0.963504	0.960784	0.971538
scaffold_11:1655394-1655473	IR	NA	NA	NA	0.6	0.777778	NA	NA	0.958904	NA
scaffold_11:1657517-1657535	A3SS	0.188609	0.715152	0.312394	0.574672	0.611452	0.664086	0.505271	0.338416	0.357787
scaffold_11:1657521-1657535	A3SS	0.87931	1	0.968421	0.989474	0.986799	0.988475	NA	0.985915	0.965909
scaffold_11:1657587-1657626	A5SS	0.183381	0.715152	0.307692	0.571552	0.610924	0.657833	0.505061	0.338132	0.351271
scaffold_11:1686322-1686754	A3SS	0.424242	0	0	0.157895	0.0888889	0.0987654	0.108696	0	0.05
scaffold_11:1686322-1687006	IR	0.672727	0.230769	0.521739	0.719298	0.732026	0.939421	0.82906	0.873016	0.988213
scaffold_11:1701258-1701270	A3SS	0	0	0	0	0	0	0	0.0555556	0.0173697
scaffold_11:1701462-1701473	A3SS	0	0	0	0	0	0	0	0.0812183	0.0119332
scaffold_11:1701516-1701533	A5SS	1	1	1	1	1	1	1	0.918782	0.988067
scaffold_11:1709276-1709321	A3SS	0.3125	NA	NA	NA	1	1	NA	NA	NA
scaffold_11:1714385-1714394	Cassette	NA	NA	NA	0.866667	0.912281	0.939655	0.761194	0.882353	NA
scaffold_11:1714451-1714467	A5SS	NA	NA	NA	NA	NA	0.0681818	NA	NA	NA
scaffold_11:1731901-1731966	IR	0.171429	0.2	0.0638298	0.233333	0.368421	0.373134	0.567568	0.192308	0
scaffold_11:1741486-1741522	A3SS	0.802817	0	0	0	0	0	0	0.0188679	0.097561
scaffold_11:1741539-1741585	A5SS	0.2	1	1	1	1	1	1	0.981132	0.902439
scaffold_11:174273-174340	A3SS	0.941704	1	1	0.97619	0.964602	0.990868	0.980237	1	0.986486
scaffold_11:1743358-1743407	IR	NA	NA	NA	0.0490463	0.0185185	NA	NA	0.0909091	NA
scaffold_11:1746441-1746496	IR	0.833333	1	0.9	0.902913	0.860825	0.934896	0.782738	0.931159	0.90202
scaffold_11:1747500-1747554	IR	1	1	0.948718	0.86087	0.936508	0.993197	0.958525	1	0.997475
scaffold_11:1747996-1748002	A3SS	0	0	0	0.0517241	0	0	0	0	0
scaffold_11:1756814-1756824	A5SS	NA	NA	NA	NA	0.666667	0.4375	NA	NA	NA
scaffold_11:1759297-1759361	A3SS	NA	NA	NA	NA	NA	0.114286	1	0.75	NA
scaffold_11:1759297-1759361	A5SS	NA	NA	NA	NA	NA	NA	1	0.75	NA
scaffold_11:1759366-1759422	A3SS	NA	NA	NA	NA	NA	NA	0	0.25	NA
scaffold_11:1759366-1759422	A5SS	NA	NA	NA	NA	NA	0.885714	0	0.25	NA
scaffold_11:1759547-1759608	IR	NA	NA	NA	NA	NA	NA	0.85	0.782609	NA
scaffold_11:1759668-1759736	IR	NA	NA	0.454545	NA	NA	NA	NA	0.869565	NA
scaffold_11:1772080-1772171	IR	0	0.178571	0.0422265	0.0623701	0.0794045	0.0628019	0.148725	0.210638	0.140845
scaffold_11:1773990-1774007	A3SS	0.971429	1	1	0.973958	0.975501	0.932836	0.963889	0.980263	0.986028
scaffold_11:1774042-1774062	A5SS	0.0285714	0	0	0.0260417	0.0244989	0.0774908	0.0280112	0.0197368	0.014
scaffold_11:1789979-1790061	A5SS	NA	0.211538	0.0658349	0.550548	0.450612	NA	0.821918	0.241773	0.162162
scaffold_11:1790040-1790061	Cassette	NA	0.212903	NA	NA	0.452167	NA	0.823163	NA	NA
scaffold_11:1790051-1790061	Cassette	0.301298	0.212903	0.0658476	NA	0.451429	0.631612	0.82236	0.243788	0.164045
scaffold_11:1790051-1790172	Cassette_multi	0.0240964	NA	NA	0.016	NA	0.0555556	NA	NA	NA
scaffold_11:1790123-1790172	Cassette	NA	NA	0.0658729	0.551095	NA	NA	NA	NA	NA
scaffold_11:1790123-1790280	A3SS	NA	0.217949	0.0662315	NA	0.452614	0.623698	0.822943	0.242424	0.162162
scaffold_11:179839-179892	IR	0.00471356	0.0864865	0.0194346	0.0195777	0.0183541	0.0226849	0.0128824	0.0113788	0.0101716
scaffold_11:1806518-1806543	A3SS	NA	NA	NA	0.56	NA	NA	NA	0.882353	NA
scaffold_11:1806524-1806543	A5SS	NA	NA	NA	0.521739	NA	NA	NA	0	NA
scaffold_11:1815747-1815809	IR	0.285714	0	0.00666667	0.0126783	0.0136157	0.00943396	0	0	0.0121951
scaffold_11:1819352-1819408	IR	NA	NA	NA	NA	0.761905	0.722222	NA	NA	NA
scaffold_11:1831941-1831955	A5SS	1	1	0.974359	0.980392	0.992481	0.970326	0.908654	0.820611	0.807692
scaffold_11:1876892-1876903	A5SS	NA	NA	NA	0.166667	NA	0.111111	NA	NA	0.00223214
scaffold_11:1876945-1877001	IR	NA	NA	NA	0.905882	0.960784	0.965517	0.880597	1	0.997475
scaffold_11:1877217-1877252	A3SS	NA	NA	NA	NA	0.08	0.0612245	NA	NA	0
scaffold_11:1877236-1877252	MXE	NA	NA	NA	0.0909091	NA	0	NA	0	0
scaffold_11:1877343-1877395	IR	NA	NA	NA	0.525	0.352941	0.25	NA	0.015625	0.0175055
scaffold_11:187735-187793	IR	0	0.631579	0.599265	0.682119	0.660391	0.536638	0.556589	0.64	0.769231
scaffold_11:1879533-1879545	A3SS	0.421053	NA	NA	NA	NA	0.0869565	NA	0.307692	NA
scaffold_11:1879585-1879598	A5SS	0.578947	NA	NA	NA	NA	0.913043	NA	0.692308	NA
scaffold_11:1885092-1885115	A3SS	NA	1	NA	NA	NA	NA	NA	0.902913	NA
scaffold_11:1885092-1885115	A5SS	1	NA	0.991597	0.983333	1	1	0.99841	0.902913	1
scaffold_11:1885161-1885181	A3SS	0	NA	0.00840336	0.0166667	0	0	0.00158983	0.105769	0
scaffold_11:1885161-1885181	A5SS	NA	0	NA	NA	NA	NA	NA	0.105769	NA
scaffold_11:1885772-1885833	IR	1	1	1	0.993827	1	1	1	0.920732	0.999644
scaffold_11:1886442-1886449	A3SS	0	0	0	0	NA	0	0.0027027	0.322222	0.00692841
scaffold_11:1886442-1886449	A5SS	NA	NA	NA	NA	0.0104167	NA	NA	0.322222	NA
scaffold_11:1886497-1886507	A3SS	NA	NA	NA	NA	0.989583	NA	NA	0.677778	NA
scaffold_11:1886497-1886507	A5SS	1	1	1	1	NA	1	0.997297	0.677778	0.993072
scaffold_11:1886614-1886629	A3SS	0	0.0105263	0	0.0724638	NA	0.00806452	0.0150376	NA	0.0367893
scaffold_11:1886672-1886682	A3SS	1	0.989474	1	0.927536	0.968504	0.991935	NA	0.647059	0.966443
scaffold_11:1886672-1886682	A5SS	1	0.989474	1	0.927536	0.968504	0.991935	0.988679	0.647059	0.966443
scaffold_11:1893578-1893615	A3SS	1	1	0.997059	1	1	1	0.998371	0.997204	0.920082
scaffold_11:1893631-1893670	A5SS	NA	0	0	NA	NA	0	0.00162866	0.00186741	0.0665281
scaffold_11:1910170-1910197	A3SS	0	0	0	0.037037	0.00364964	0	0	0.442652	0.02457
scaffold_11:1910247-1910513	Cassette	0.0252525	0	0	0.0421053	0.00364964	0.00234192	0.00543478	0.631319	0.231804
scaffold_11:1910522-1910551	MXE	1	1	1	0.994536	1	1	1	0.538739	0.966169
scaffold_11:1910522-1910620	A5SS	1	1	1	0.994536	1	1	1	0.539568	NA
scaffold_11:1948837-1948846	A5SS	NA	NA	NA	NA	NA	0.6	0.818182	0.7	NA
scaffold_11:1952229-1952518	A5SS	0	0	0	0	0	0	0	0.162338	0
scaffold_11:1952589-1952757	A3SS	0	0	0	0	0	0	0	0.162338	0
scaffold_11:1952589-1952757	A5SS	0	NA	NA	NA	NA	0	0	0.162338	NA
scaffold_11:1957691-1957745	IR	0.347826	0.333333	0.0967742	0.0890411	0.143791	0.170854	0.145923	0.097561	0.16092
scaffold_11:1964780-1964785	A3SS	0.9	0.869565	0.935065	0.802444	0.822464	0.52193	0.617577	0.760606	0.764706
scaffold_11:2054142-2054148	A3SS	NA	NA	NA	NA	NA	0.866548	0.886667	NA	NA
scaffold_11:2134413-2134475	A3SS	NA	0.971154	0.988235	0.938017	0.957219	0.957082	0.93154	0.752688	0.942857
scaffold_11:2134476-2134530	A5SS	0.0571429	0.0190476	0.0117647	0.0365854	0.0213904	0.0379747	0.0532688	0.0967742	0
scaffold_11:2140845-2140897	IR	NA	NA	NA	NA	0.96875	NA	0.882353	NA	NA
scaffold_11:2161954-2161961	A5SS	NA	NA	NA	0.285714	0.266667	NA	NA	0.173913	0.209302
scaffold_11:2166366-2166443	IR	0	0	0	0.0681818	0.0131579	0.0613497	0.0289017	0.0930233	0.0203957
scaffold_11:259169-259179	A5SS	0.367089	NA	NA	0.102941	NA	NA	NA	NA	NA
scaffold_11:269450-269509	IR	0.832258	1	0.985185	0.98367	0.98325	0.970717	0.982653	0.979021	0.945545
scaffold_11:269509-269515	A5SS	NA	NA	NA	0.777778	0.827586	0.862745	NA	NA	NA
scaffold_11:269515-269537	A5SS	NA	NA	NA	0.428571	NA	0.466667	NA	NA	NA
scaffold_11:269638-269655	A5SS	NA	0.0555556	0.0487805	0.00642055	NA	0.00872093	0.00832466	0.0337838	NA
scaffold_11:270939-270985	IR	0.0222222	0	0.0862069	0.0526316	0.0608108	0.049505	0.147541	0.0403361	0.0570342
scaffold_11:272024-272076	IR	0	0	0	0.0865385	0.0812183	0.0680628	0.0439024	0.0296392	0.0474684
scaffold_11:303740-303807	IR	0.142857	0.0714286	0.0108696	0.126316	0.164706	0.0638298	0.128834	0.0258065	0.1875
scaffold_11:307728-307823	IR	0.0671233	0.0427136	0.0240642	0.0307434	0.0328305	0.0500253	0.0473568	0.0625674	0.105534
scaffold_11:339271-339327	IR	0.0415254	0.125	0.00255428	0.0267857	0.00189036	0.0527778	0.0528302	0.00401606	0.016
scaffold_11:369294-369308	A5SS	1	1	1	1	1	1	1	0.97	0.06
scaffold_11:369353-369368	A3SS	NA	NA	0	0	0	0	0	0.03125	0.937824
scaffold_11:369368-369375	A3SS	0.931174	1	1	1	0.980769	0.97541	0.971014	0.958763	NA
scaffold_11:374087-374274	IR	0.949212	0.970588	0.961957	0.896552	0.87478	0.864888	0.944065	0.964989	0.934132
scaffold_11:379678-379740	IR	0.981752	NA	NA	0.947368	NA	NA	0.944444	NA	NA
scaffold_11:425357-425401	A3SS	NA	NA	NA	NA	NA	1	NA	NA	0.3125
scaffold_11:426108-426175	IR	NA	NA	NA	NA	NA	0.998108	NA	NA	0.119134
scaffold_11:426315-426338	A3SS	1	NA	NA	0.0121951	NA	NA	NA	NA	NA
scaffold_11:426315-426338	A5SS	NA	NA	0.0952381	NA	NA	NA	NA	0.982609	NA
scaffold_11:432407-432413	A3SS	NA	NA	NA	NA	0.875	0.8	0.533333	NA	0.740741
scaffold_11:437564-437572	A3SS	NA	NA	NA	NA	NA	0.936	0.945578	NA	NA
scaffold_11:441531-441598	IR	NA	NA	NA	0.988764	NA	NA	NA	0.949219	NA
scaffold_11:468147-468207	IR	0.0483871	0.157895	0.0373832	0.0281518	0.0144462	0.0134228	0.033195	0.0460123	0.0148699
scaffold_11:489667-489718	IR	0.865385	NA	NA	NA	0.987469	0.994357	NA	NA	NA
scaffold_11:491614-491636	A3SS	NA	NA	NA	NA	NA	NA	NA	0.981928	0.927083
scaffold_11:537600-537657	IR	0.673729	1	0.978261	0.943262	0.95122	0.951009	0.937107	0.942029	0.85
scaffold_11:538247-538253	A3SS	NA	NA	NA	0.987013	0.989899	0.947368	0.989796	0.980952	0.933333
scaffold_11:554712-554732	A5SS	0.925926	NA	NA	0.866667	0.882353	0.859649	NA	0.96748	0.898734
scaffold_11:556317-556371	IR	0.937984	NA	NA	NA	NA	0.988372	NA	0.994924	NA
scaffold_11:620209-620265	IR	0.98018	1	0.974648	0.938053	0.964427	0.946955	0.958647	0.953125	0.948718
scaffold_11:623672-623725	IR	0.461538	NA	NA	NA	NA	NA	NA	NA	0.983982
scaffold_11:642532-642617	IR	0.702495	0.215054	0.104895	0.060745	0.0777834	0.124741	0.0929221	0.0295238	0.0406015
scaffold_11:642579-642617	A5SS	0.0545455	NA	NA	NA	NA	0.00235988	NA	NA	NA
scaffold_11:650278-650413	IR	0.283019	0.324324	0.133588	0.196667	0.236522	0.109726	0.119303	0.0804769	0.124424
scaffold_11:652790-652809	A3SS	NA	NA	NA	NA	NA	NA	NA	0.883117	0.571429
scaffold_11:734653-734671	A5SS	NA	NA	NA	0.826087	0.774194	0.85	0.833333	0.896552	NA
scaffold_11:737547-737556	A3SS	NA	NA	NA	NA	0.944444	NA	NA	0.996004	0.990982
scaffold_11:757397-757484	IR	0.0573066	0.12	0.0570175	0.0776439	0.0870206	0.0750988	0.0648567	0.117155	0.04
scaffold_11:760098-760135	A5SS	0.840249	0.97561	0.978031	0.96865	0.968826	0.968886	0.971072	0.977051	0.985045
scaffold_11:760222-760246	A3SS	0.911541	0.993902	0.997565	0.997678	0.997883	0.998364	0.998504	0.998535	0.998006
scaffold_11:772161-772219	IR	0.945055	1	0.97	0.976378	0.945098	0.955	0.980333	0.969565	0.979118
scaffold_11:773318-773379	IR	0.31	0.666667	0.944444	0.753333	0.787879	0.741206	0.836957	0.888889	0.877698
scaffold_11:78756-78810	A3SS	0.615385	NA	NA	NA	NA	NA	NA	0	NA
scaffold_11:796701-796762	IR	0.95082	1	0.986667	0.951724	0.927928	0.944444	0.972603	0.91954	0.886792
scaffold_11:809666-809717	IR	0.941176	1	1	0.993562	0.99308	0.998405	0.9968	1	0.984375
scaffold_11:812005-812026	A3SS	NA	NA	NA	0	0	0	0	0	0.929688
scaffold_11:815598-815712	A3SS	0.101266	NA	NA	NA	NA	NA	NA	NA	0.0373134
scaffold_11:815734-815842	A5SS	0.898734	NA	NA	NA	NA	NA	NA	NA	0.962687
scaffold_11:817568-817580	A3SS	0.891892	NA	NA	0.972222	NA	NA	NA	0.985577	0.787879
scaffold_11:817622-817637	A5SS	0.25	NA	NA	0.0277778	NA	NA	NA	0.0191388	0.235294
scaffold_11:819781-819848	IR	0.985075	1	0.972973	0.92268	0.971698	0.944828	0.976331	0.977143	0.973064
scaffold_11:833227-833279	IR	0.5	0.142857	0.230769	0.304976	0.210526	0.27154	0.298851	0.324232	0.3
scaffold_11:834198-834254	IR	0.910714	1	0.994413	0.994352	0.99049	0.997156	0.992294	0.988497	0.991667
scaffold_11:839520-839578	IR	0.445783	0.666667	0.721088	0.549451	0.521186	0.59633	0.579832	0.620283	0.623188
scaffold_11:843644-843697	A3SS	NA	NA	NA	NA	0.985	0.972763	NA	0.891892	NA
scaffold_11:847866-847923	IR	NA	1	1	NA	0.733333	0.818182	0.521739	0.0666667	NA
scaffold_11:857420-857470	A3SS	0.0877193	0	0	0.0521327	NA	0.0518868	0.0493827	0.0517241	0.043956
scaffold_11:857420-857470	A5SS	0.0877193	0	0	0.0521327	0.0533808	0.0518868	0.0493827	0.0517241	0.043956
scaffold_11:874891-874949	IR	0.888889	1	0.914894	0.97541	0.864	0.984914	0.983471	0.965035	0.795918
scaffold_11:879170-879181	A5SS	0.772727	1	1	0.966825	0.954545	0.896341	0.871795	0.88764	0.983607
scaffold_11:971676-971731	IR	0.00769231	0.153846	0.0454545	0.604706	0.504202	0.342679	0.40724	0.256705	0.427184
scaffold_11:995112-995128	A5SS	0.615385	NA	NA	NA	NA	0.103448	NA	NA	NA
scaffold_11:995169-995192	A3SS	0.25	NA	NA	NA	NA	0.833333	NA	NA	NA
scaffold_12:1000090-1000156	IR	0.998928	0.854651	0.993695	0.98018	0.996624	0.997732	0.988012	0.997984	1
scaffold_12:1002221-1002272	IR	0.0212766	0.166667	0.0727273	0	0.0165289	0.0272727	0.0113636	0.015873	0.130952
scaffold_12:1013987-1014052	IR	0.0100714	0.0344828	0.145833	0.039604	0.137931	0.111111	0.035461	0.0773481	0
scaffold_12:1023151-1023158	A3SS	0.0677966	0	0.0194805	0.0494297	0.0504451	0.0791367	0.0565217	0.0572917	0.027027
scaffold_12:1028449-1028505	IR	1	1	0.958042	0.991992	0.977636	0.976091	0.975791	0.94863	0.888889
scaffold_12:1034182-1034231	IR	0.129944	0	0.034632	0.0280112	0.0390625	0.03125	0.0273843	0.0161812	0.00419413
scaffold_12:1036748-1036828	AltEnd	NA	NA	NA	NA	NA	NA	NA	1	0.933333
scaffold_12:1036875-1036888	A5SS	NA	NA	NA	NA	NA	NA	NA	0.5	0.642857
scaffold_12:1037260-1037269	A5SS	0.12766	0.2	0.0209581	0.107362	0.0899183	0.135922	0.235	0.0758621	0.133562
scaffold_12:1040057-1040116	IR	NA	NA	NA	0.837838	0.914286	0.939394	NA	NA	NA
scaffold_12:1043440-1043507	IR	0.0581818	0.0357143	0.0207469	0.0172911	0.0294511	0.0142405	0.0238095	0.0394633	0.0245665
scaffold_12:1063168-1063188	A5SS	0	0.0153846	0	0.0269865	0.0291439	0.025	0.0382883	0.0629371	0.0447761
scaffold_12:1063222-1063297	A3SS	1	0.984615	0.944444	0.970194	0.970962	0.975062	0.941573	0.936953	0.954887
scaffold_12:1064796-1064863	A5SS	0.932749	1	1	1	0.994898	0.986034	0.996124	0.991489	0.976331
scaffold_12:1064925-1064950	A3SS	0.93457	1	1	1	0.997442	0.994366	0.996124	0.991489	0.976331
scaffold_12:1074537-1074593	IR	0	0	0	0.113208	0.0657895	0	0.0526316	0	0.545455
scaffold_12:1077340-1077348	A5SS	0.730159	0.818182	0.905263	0.859504	0.87931	0.814103	0.793103	0.879195	0.848214
scaffold_12:1078494-1078500	A5SS	0.935606	1	0.78125	0.786561	0.756554	0.865801	0.785047	0.676329	0.8
scaffold_12:1087347-1087361	A3SS	1	0.96	0.945338	0.926136	NA	0.923077	0.914081	0.960328	0.956522
scaffold_12:1087347-1087361	A5SS	1	0.96	0.945338	0.926136	0.937337	0.923077	0.914081	0.960328	0.956522
scaffold_12:1087350-1087361	A3SS	NA	NA	NA	NA	NA	0	0	0	0.142857
scaffold_12:1087391-1087449	IR	0.142857	0	0.0121951	0.0769231	0.0648379	0.0412371	0.0204082	0.0262751	0.008
scaffold_12:1115693-1115754	IR	0.0214286	0.0625	0.0431034	NA	0.06875	0.0992063	0.190083	0.0123711	0.0368098
scaffold_12:1115775-1115847	IR	NA	0.285714	0.00925926	0.0110497	0.0632911	0.112403	0.128755	0.00416667	0.02
scaffold_12:1127951-1128009	IR	0.997326	0.851064	0.962712	0.978193	0.964467	0.99388	0.982625	0.886297	0.723005
scaffold_12:1139204-1139223	AltEnd	0.940426	0.947368	0.925373	0.914286	0.941176	0.940299	0.945055	0.921951	0.93617
scaffold_12:1141870-1141929	IR	0.0344828	0.125	0.225806	0.00947867	0.0664207	0.025974	0.0756303	0.263473	0.266667
scaffold_12:114299-114329	A3SS	0.926471	1	0.991935	0.994755	0.99115	0.995086	0.992593	0.990566	0.965517
scaffold_12:114388-114419	A5SS	0.920821	1	0.991935	0.994755	0.99115	0.995086	0.99382	0.990566	0.965517
scaffold_12:1150534-1150637	IR	0.166667	0.25	0.14	0.244582	0.225177	0.243169	0.325039	0.265233	0.19697
scaffold_12:1157699-1157755	IR	NA	NA	0.85	0.881657	0.872727	0.828829	0.893617	NA	NA
scaffold_12:1158257-1158679	IR	NA	0	0	NA	0.109677	0.186047	NA	0.181818	NA
scaffold_12:1158928-1159047	IR	0.0833333	0.0666667	0.097561	0.0357143	0.0584795	0.0326797	0.0126582	0.117647	0.666667
scaffold_12:1161927-1161983	IR	NA	0.833333	0.961131	0.931751	0.961538	NA	0.975	0.966667	1
scaffold_12:118380-118392	A3SS	0	NA	NA	NA	0.25	0.00425532	NA	0.905172	NA
scaffold_12:1279519-1279528	A3SS	0.899281	1	0.852459	0.891599	0.892116	0.909502	0.859935	0.865952	0.858407
scaffold_12:1284715-1284776	IR	NA	NA	NA	0.982353	NA	NA	NA	0.9801	0.921569
scaffold_12:1285954-1285963	A5SS	NA	NA	NA	0.00980392	NA	0.0487805	0.0483871	0.0641026	0.1
scaffold_12:1297650-1297729	IR	1	1	1	1	1	1	1	0.995204	0.928839
scaffold_12:1298439-1298449	A3SS	0.0366972	0.0769231	0.0416667	0.025	0.0300231	0.0187075	0.0286976	0.0222222	0.00887574
scaffold_12:1300600-1300623	A3SS	0.0567376	0.0204082	NA	0.0165816	0.0121581	0.0172414	0.0286885	0.030303	0.0322581
scaffold_12:1300600-1300671	Cassette	0.982729	0.98995	0.931759	0.984356	0.987336	0.995253	0.984111	0.98313	0.975669
scaffold_12:1300800-1300853	IR	0.947692	1	0.99576	0.994717	0.99707	0.993414	0.996972	0.993469	0.996466
scaffold_12:1348908-1348949	A3SS	0.0833333	NA	NA	NA	NA	NA	NA	0.00990099	NA
scaffold_12:1348963-1349014	A5SS	0.916667	NA	NA	NA	NA	NA	NA	0.990099	NA
scaffold_12:1383636-1383756	IR	0.270588	0.25	0.0923077	0.087156	0.0883534	0.197279	0.205479	0.0731707	0.217391
scaffold_12:1383961-1384022	IR	0.0188679	0.444444	0	0.0474308	0.0590278	0.05	0.106145	0.0378378	0
scaffold_12:1384755-1384846	IR	0.281879	0.173913	0.049505	0.0604915	0.0631277	0.15873	0.0736342	0.0230179	0.0309278
scaffold_12:1396321-1396415	A3SS	0.991166	NA	0.974545	0.995825	0.993988	0.99	0.997175	0.972477	0.918367
scaffold_12:1397407-1397439	A3SS	0.142857	0.1875	0.0215827	0.043771	0.0583333	0.0355556	0.0394737	0.00558659	0
scaffold_12:1426229-1426290	IR	0.0769231	0	0.0204082	0.0701754	0.0451128	0.0232558	0.0664452	0.0550351	0.0408163
scaffold_12:1445215-1445272	IR	0.0185185	0	0	0.111111	0.112782	0.0746269	0.0559211	0.0181818	0.0416667
scaffold_12:1447046-1447102	IR	1	1	0.999329	1	1	1	1	0.933174	0.887755
scaffold_12:1447230-1447245	A5SS	0.999622	1	1	0.99946	1	1	1	0.946524	0.971429
scaffold_12:1450875-1450950	IR	0.135484	0.12	0.242718	0.25	0.187117	0.208861	0.309179	0.278539	0.215311
scaffold_12:1455089-1455251	A3SS	NA	NA	NA	NA	0.117647	0.12	NA	0.357143	1
scaffold_12:1466537-1466597	IR	0.0217391	0.0952381	0.0416667	0.0420168	0.0318182	0.0120482	0.0307018	0.00576184	0.00909091
scaffold_12:1469709-1469759	IR	NA	NA	NA	NA	0.818182	NA	NA	0.741935	NA
scaffold_12:1478893-1478904	A3SS	NA	NA	0.985507	0.924528	NA	NA	NA	0.988235	0.966667
scaffold_12:1478946-1478962	A5SS	NA	NA	0.0144928	0.0925926	NA	NA	NA	0.0117647	0.0333333
scaffold_12:1497475-1497526	IR	0.818182	NA	NA	NA	NA	NA	0.980892	NA	NA
scaffold_12:1498735-1498746	A5SS	0.666667	NA	NA	0.491803	NA	NA	NA	NA	NA
scaffold_12:1500844-1500855	A5SS	0	NA	NA	0.00308642	0	0.00671141	0	0	0.314286
scaffold_12:1500898-1500919	A3SS	1	NA	NA	0.996914	1	0.993289	1	1	0.685714
scaffold_12:1500898-1500919	A5SS	1	1	0.996639	0.996914	1	0.993289	1	1	0.685714
scaffold_12:1511221-1511276	IR	0.25	NA	NA	0.411765	0.238342	NA	NA	0.247104	NA
scaffold_12:1515563-1515574	A5SS	NA	NA	NA	0.615385	0.785714	0.583333	0.736842	NA	0.923913
scaffold_12:1515616-1515630	A3SS	NA	NA	NA	0.384615	0.214286	0.461538	0.263158	NA	0.076087
scaffold_12:1517542-1517611	IR	0	0.911765	0.815385	0.695473	0.832061	0.375	0.241379	0.432432	0.869565
scaffold_12:1521602-1521622	A3SS	0.944444	0.933333	0.96875	0.955224	0.941176	0.988764	0.97561	0.94709	0.940181
scaffold_12:153308-153313	Cassette	0.924731	NA	NA	0.990683	0.986425	0.958904	0.979839	NA	0.985714
scaffold_12:1536668-1536731	IR	NA	NA	NA	0.947368	NA	NA	0.965517	NA	NA
scaffold_12:1544804-1544859	IR	NA	NA	NA	NA	NA	NA	1	0.990991	0.94086
scaffold_12:1544804-1544862	IR	0.8	NA	NA	0.924883	NA	NA	0.986772	0.956897	NA
scaffold_12:1556865-1556876	A3SS	0.05	0.0434783	0.25	0.0638298	0.0588235	0.047619	0.0635838	0.0689655	0.0166667
scaffold_12:1582056-1582061	Cassette	0.734177	0.833333	0.571429	0.714286	0.636364	0.636364	0.666667	0.521127	0.541667
scaffold_12:1585861-1585926	IR	0.923077	0.9375	0.914894	0.705882	0.685714	0.74359	0.76	0.640927	0.697234
scaffold_12:1589695-1589709	A3SS	0	0.0238095	0.00418994	0.0443787	0.00250627	0.0769231	0.0848708	0.0217391	0.0725806
scaffold_12:1589754-1589778	A5SS	1	0.97619	0.99581	0.955621	0.997494	0.923077	0.915129	0.978261	0.927419
scaffold_12:1590990-1591053	IR	0.0776256	0	0.00491803	0.074928	0.0413386	0.100304	0.0888889	0.0212766	0.078125
scaffold_12:1603176-1603217	A5SS	0.910448	NA	NA	NA	NA	0.95	NA	NA	NA
scaffold_12:1615396-1615411	A5SS	NA	NA	NA	0.875	NA	NA	NA	1	NA
scaffold_12:1616055-1616070	A3SS	NA	NA	NA	1	0.888889	NA	NA	NA	1
scaffold_12:1702896-1702904	A3SS	NA	0.625	0.714286	NA	NA	NA	0.740933	0.768	0.676259
scaffold_12:1711440-1711491	A5SS	0.777778	0.909091	1	0.887324	0.88806	0.818182	0.978261	0.943396	0.972973
scaffold_12:1711497-1711556	A3SS	0.125	0.0909091	0	0.0869565	0.105263	0.162791	0.0217391	0.0566038	0
scaffold_12:1716278-1716296	A3SS	NA	NA	NA	0.119403	0.146341	0.208333	NA	0.0487805	NA
scaffold_12:1716278-1716305	Cassette	NA	NA	NA	0.905405	0.931818	NA	NA	NA	NA
scaffold_12:1722092-1722170	IR	0.811321	1	0.97619	0.985075	0.972222	0.96319	0.962366	0.975904	0.974425
scaffold_12:1752192-1752254	IR	0.938053	NA	NA	NA	NA	0.965035	NA	0.972222	NA
scaffold_12:1765305-1765316	A3SS	0.0783133	0	0.0111111	0.015873	0.0101351	0.00928793	0.0503876	0.0273973	0.0204082
scaffold_12:1765546-1765577	A5SS	0.910714	1	1	1	1	0.995327	1	1	0.989362
scaffold_12:1765620-1765638	A3SS	0.0900901	0	0	0	0	0.0046729	0	0	0.0106383
scaffold_12:1780786-1780844	IR	0.713115	0.875	0.682927	0.717172	0.625899	0.625668	0.892523	0.907975	0.84589
scaffold_12:178890-178927	A3SS	0.0243902	NA	NA	0	0	0	NA	0	0.567797
scaffold_12:178944-178983	A3SS	0.97561	NA	1	1	1	1	1	1	0.414634
scaffold_12:178944-178983	A5SS	NA	NA	NA	NA	NA	NA	NA	1	0.414634
scaffold_12:179285-179352	IR	NA	1	NA	NA	NA	NA	NA	NA	0.632743
scaffold_12:1794794-1794846	IR	0.732804	0.842105	0.972477	0.938111	0.963816	0.864286	0.963989	0.976774	0.983193
scaffold_12:181695-181747	A5SS	NA	NA	NA	0.444444	NA	NA	0.571429	NA	NA
scaffold_12:181747-181814	IR	NA	NA	NA	NA	NA	0.98	0.941606	NA	0.98
scaffold_12:181923-181935	A5SS	NA	NA	NA	NA	NA	0.642857	0.625	NA	0.615385
scaffold_12:181935-181940	A3SS	0.307692	NA	NA	NA	NA	NA	NA	NA	0.636364
scaffold_12:181935-181944	A3SS	0.4	NA	NA	0.619048	0.566667	0.653846	NA	0.764706	0.2
scaffold_12:182014-182029	A5SS	NA	NA	NA	0.826087	0.882353	0.851852	0.75	NA	0.727273
scaffold_12:182074-182090	A3SS	NA	NA	NA	NA	NA	NA	0.352941	NA	0.428571
scaffold_12:182101-182161	IR	NA	NA	NA	NA	NA	0.931507	0.887097	0.97561	0.964286
scaffold_12:1835271-1835325	A5SS	0.72314	0.875	0.968085	1	1	0.985401	0.993266	0.990991	0.960526
scaffold_12:1846149-1846212	IR	0.928	1	1	0.996667	0.995227	0.992537	0.96679	0.953488	0.96875
scaffold_12:1876270-1876312	A3SS	NA	NA	NA	NA	0.104478	NA	0.0862069	0.0819672	NA
scaffold_12:1881153-1881160	A5SS	NA	NA	NA	NA	0.0506329	0.0346535	NA	NA	NA
scaffold_12:1884730-1884847	IR	NA	NA	0.846154	NA	0.963855	0.96875	0.988235	NA	NA
scaffold_12:189213-189287	IR	NA	NA	0.107143	0.0580913	0.0430108	0.0769231	0.0144928	0.0833333	0.0555556
scaffold_12:1925953-1925960	A5SS	0.232955	0.75	0.524823	0.469444	0.479518	0.43379	0.532653	0.579694	0.557432
scaffold_12:1926028-1926050	AltEnd	0.224138	0.714286	0.517986	0.458924	0.475728	0.425926	NA	NA	0.556701
scaffold_12:1939673-1939754	IR	0.923077	NA	NA	NA	NA	NA	NA	0.836364	NA
scaffold_12:1945971-1945984	A3SS	0.775194	0.941176	0.988636	0.952586	0.995652	0.949239	0.970297	0.956647	0.985507
scaffold_12:1950443-1950521	Cassette	NA	0.647059	0.959641	NA	NA	NA	NA	NA	NA
scaffold_12:1952593-1952605	A3SS	0.95	0.777778	0.769231	0.707182	0.835938	0.763636	0.883721	0.812766	0.807143
scaffold_12:1955171-1955359	IR	0.223077	0.0555556	0.0598291	0.00646204	0.020915	0.066482	NA	0.0362416	0.0181269
scaffold_12:1969312-1969371	IR	0.884615	1	0.948276	0.918605	0.990196	0.978049	0.895981	0.954373	0.95122
scaffold_12:2010606-2010659	IR	0.0758621	NA	0.047619	0.0512821	0.0444444	0.0416667	0.0521739	0.0837989	0.111111
scaffold_12:2010743-2010791	IR	0.0382166	0	0	0.0243902	0	0.0689655	0	0.0460993	0.0142857
scaffold_12:2011961-2011982	A5SS	1	1	1	0.949721	0.949861	1	0.994949	1	0.890244
scaffold_12:2011982-2012034	IR	0	0	0	0.137056	0.111979	0.0120482	0.0343137	0.00386847	0.215054
scaffold_12:2012022-2012034	A3SS	0	0	0	0.0529248	0.0501393	0	0.00505051	0	0.109756
scaffold_12:2012488-2012573	IR	0.333333	NA	NA	0.428571	0.172222	0.692308	0.110048	0.0969697	NA
scaffold_12:2085945-2085951	A5SS	NA	NA	NA	NA	NA	0.0784314	0.0346821	NA	NA
scaffold_12:2119748-2119802	IR	NA	NA	NA	NA	NA	NA	NA	0.938776	0.966667
scaffold_12:2119845-2119916	IR	1	NA	NA	NA	NA	NA	NA	0.948276	NA
scaffold_12:2120917-2120927	A5SS	1	0.857143	0.956522	0.990982	0.993443	0.991636	0.992869	NA	1
scaffold_12:2121071-2121080	A3SS	NA	NA	NA	NA	0.00711744	0.00672646	0.0102041	NA	0.0724638
scaffold_12:2121071-2121080	A5SS	0	NA	NA	NA	NA	NA	NA	0.00543478	0.0724638
scaffold_12:2121073-2121080	A3SS	0.111111	0	0.104167	0.0740385	0.0720621	0.0770833	NA	0.120192	0.146667
scaffold_12:2121073-2121080	A5SS	NA	NA	NA	0.0740385	NA	NA	NA	0.120192	NA
scaffold_12:2121232-2121238	A3SS	NA	NA	0.901639	NA	0.874109	0.909091	0.945946	0.939394	NA
scaffold_12:2138220-2138248	Cassette	0	NA	NA	NA	NA	NA	0.625	NA	NA
scaffold_12:2143401-2143542	IR	NA	NA	NA	NA	0.5	NA	NA	0.8125	NA
scaffold_12:2154603-2154650	A3SS	0.0304348	NA	NA	NA	NA	NA	NA	0.5	NA
scaffold_12:2154931-2154960	A3SS	0.580645	0	0.00316456	0.0261438	0.0168919	0.0493827	0.0740741	0.5	0.0232558
scaffold_12:2154931-2154960	A5SS	0.580645	NA	NA	0.0261438	0.0168919	NA	0.0740741	NA	NA
scaffold_12:2155007-2155021	A3SS	NA	NA	NA	0.973856	0.983108	NA	0.925926	NA	NA
scaffold_12:2155007-2155021	A5SS	0.419355	1	0.996835	0.973856	0.983108	0.950617	0.925926	0.5	0.976744
scaffold_12:2161681-2161689	A3SS	NA	NA	NA	0.9	NA	0.903226	NA	NA	NA
scaffold_12:253842-253860	A3SS	0.454545	0.5	0.363636	0.238806	0.254237	0.277108	0.16	0.227273	0.4
scaffold_12:253847-253860	A3SS	NA	0.625	0.829268	NA	NA	NA	NA	NA	0.4
scaffold_12:257971-257993	A3SS	0.969231	1	1	1	1	1	0.939759	0.991364	0.995048
scaffold_12:266740-266804	IR	0.4	NA	0.833333	NA	NA	NA	NA	NA	NA
scaffold_12:275780-275833	IR	0.828571	NA	NA	NA	NA	NA	NA	0.966942	0.940476
scaffold_12:276232-276246	A3SS	1	NA	NA	0.8	0.75	0.771429	0.724138	0.789474	0.878788
scaffold_12:289118-289187	IR	0.933333	NA	NA	NA	NA	NA	NA	0.994269	0.970711
scaffold_12:316157-316223	IR	0.1	0.714286	0.125	0.229508	0.0615385	0.0631579	0.122449	0.247191	0.142857
scaffold_12:317728-317776	A5SS	NA	NA	NA	NA	NA	NA	NA	0.782609	0.538462
scaffold_12:317733-317776	Cassette	NA	NA	NA	NA	NA	NA	NA	0.878049	0.727273
scaffold_12:317817-317828	A3SS	NA	NA	NA	NA	NA	NA	NA	0.234043	0.272727
scaffold_12:319040-319105	IR	NA	NA	0.714286	NA	NA	NA	NA	NA	0.769231
scaffold_12:328582-328587	A3SS	NA	NA	NA	NA	NA	NA	0.854167	0.789474	NA
scaffold_12:34131-34825	IR	0.222222	1	0.869565	0.983607	0.9625	0.968912	0.984615	0.994845	0.974026
scaffold_12:367739-367798	IR	0.729167	1	1	NA	NA	NA	NA	NA	0.963964
scaffold_12:368502-368554	IR	0.5	0	0.0666667	0.2	0.0851064	0.0533333	0.225	0.205882	0.74
scaffold_12:369997-370062	IR	0.45	0.25	0.263158	0.25	0.15	0.102041	0.214286	0.267857	0.777778
scaffold_12:370090-370143	IR	0.307692	0	0.0588235	NA	0.0204082	0.0192308	0.153846	0.116279	0.692308
scaffold_12:371958-372022	IR	0.810458	0.954545	0.96875	0.983713	0.973207	0.961471	0.925676	0.93725	0.921788
scaffold_12:373292-373298	A3SS	0.057971	0.1	0.0555556	0.0175439	0.0258964	0.0123839	0.0382883	0.0205128	0
scaffold_12:421574-421630	A5SS	0.0620155	0.0833333	0	0.00416667	0.00983607	0.0165289	0.0221811	0.015361	0.0143541
scaffold_12:422931-422985	A5SS	0.936709	NA	NA	NA	NA	NA	NA	NA	1
scaffold_12:423082-423095	A3SS	0.936709	NA	NA	NA	NA	NA	NA	NA	1
scaffold_12:423296-423511	IR	0.126761	0.636364	0.156863	0.165605	0.178771	0.110526	0.134328	0.0421456	0.0674157
scaffold_12:425281-425294	A5SS	0.882353	1	1	0.988827	1	1	1	0.914286	1
scaffold_12:425402-425428	A5SS	0.172414	0	0	0.0176471	0.0149254	0.0133333	0.0510949	0.166667	0.0645161
scaffold_12:425476-425481	A3SS	0.75	1	1	0.982353	0.985075	0.986667	0.942029	0.815789	0.935484
scaffold_12:426317-426376	Cassette	NA	NA	NA	1	NA	0.914894	NA	NA	NA
scaffold_12:42632-42702	A5SS	0.428571	1	0.992537	0.989709	0.997183	1	1	0.93617	0.889251
scaffold_12:426369-426376	Cassette	1	1	1	NA	1	0.911661	0.987952	0.986301	1
scaffold_12:42715-43013	Cassette	0.608696	NA	NA	NA	NA	0.00101989	NA	NA	NA
scaffold_12:42715-43385	A3SS	0.612903	0.011236	0.0184502	0.0109025	0.00282486	0	0.0004095	0.0638298	0.110749
scaffold_12:433970-434449	IR	0.0166667	0	0.0576923	0.0917431	0.0852273	0.0629139	0.1	0.0909091	0.1
scaffold_12:448878-449277	IR	0.0138249	0.0277778	0.00776398	0.0138812	0.0151423	0.0176211	0.0254826	0.0176817	0.0673854
scaffold_12:461963-461967	Cassette	NA	NA	NA	0.8	0.681818	0.730769	0.75	0.78125	NA
scaffold_12:461963-461972	A5SS	NA	NA	NA	0.8	NA	0.730769	NA	NA	NA
scaffold_12:462262-462308	IR	NA	NA	0.941176	NA	1	NA	NA	NA	NA
scaffold_12:467492-467547	IR	0.344262	0.8	0.804511	0.753695	0.793594	0.715686	0.758621	0.838384	0.807692
scaffold_12:473268-473280	A3SS	NA	NA	NA	0.222222	0.206897	0.238095	NA	NA	NA
scaffold_12:473622-473673	IR	0.0645161	0.0454545	0.0526316	0.0294118	0.0162602	0.0556901	0.0612903	0.02407	0.0294985
scaffold_12:473673-473681	A3SS	0.859838	1	0.978261	0.934844	0.962227	0.958231	0.93871	0.936975	0.959184
scaffold_12:50093-50102	A3SS	0.235632	0.0588235	0.0967742	0.101923	0.0883085	0.091133	0.0771325	0.0600227	0.0845588
scaffold_12:522772-522840	IR	0.936	NA	NA	NA	0.964286	0.928571	NA	NA	NA
scaffold_12:528602-528661	IR	1	NA	NA	NA	0	NA	NA	NA	NA
scaffold_12:58513-58586	IR	NA	NA	0.987552	NA	NA	0.992968	0.985537	0.952941	0.862069
scaffold_12:631923-631936	A5SS	NA	NA	NA	NA	0	NA	0.3	NA	NA
scaffold_12:632113-632181	IR	NA	NA	NA	0.416667	0.5	NA	0.740741	NA	NA
scaffold_12:66737-66813	IR	0.00142328	0	0	0	0	0.00952381	0.00451467	0.00387597	0.202247
scaffold_12:695938-696036	IR	NA	NA	0.909091	NA	NA	NA	NA	0.95	0.892857
scaffold_12:715990-716035	A3SS	0.875	NA	NA	NA	NA	NA	NA	1	1
scaffold_12:730301-730310	A3SS	0.0205761	0	0.012987	0	0.00399202	0.00335008	0.00877674	0.0289017	0.0618557
scaffold_12:730355-730378	A5SS	0.979424	1	0.987013	1	0.996008	0.99665	0.991767	0.971098	0.938144
scaffold_12:742985-743002	A3SS	NA	NA	0.112903	0.0219298	0.0189873	0.0126582	0.0241287	NA	NA
scaffold_12:743041-743057	A5SS	NA	NA	0.887097	0.97807	0.981013	0.987374	0.975871	NA	NA
scaffold_12:744026-744031	A5SS	0.950704	1	1	0.923077	0.846154	0.911227	0.877698	0.867347	0.833333
scaffold_12:750159-750174	A5SS	NA	NA	NA	0	NA	NA	NA	0.823529	0.285714
scaffold_12:750217-750229	A3SS	NA	NA	NA	1	NA	NA	NA	0.176471	0.714286
scaffold_12:770837-770853	A3SS	NA	NA	0.714286	0.901786	0.91358	NA	NA	NA	NA
scaffold_12:770837-770853	A5SS	NA	NA	0.714286	0.901786	0.91358	NA	NA	NA	NA
scaffold_12:770931-770936	A3SS	NA	0.222222	0.0714286	0.100917	0.125	NA	0.130435	0.184211	NA
scaffold_12:771504-771518	A3SS	0.141791	0.0312843	0.0337621	0.0365063	0.025408	0.051671	0.0473986	0.0728083	0.0940439
scaffold_12:771504-771518	A5SS	0.141791	0.0312843	NA	NA	NA	NA	NA	NA	NA
scaffold_12:772163-772179	A5SS	0.238095	NA	0.0568182	0.057971	0.0363636	NA	NA	0.115942	0.222222
scaffold_12:795442-795447	A3SS	NA	NA	0.75	0.740741	0.752137	0.766839	0.853982	0.87013	NA
scaffold_12:807494-807550	IR	NA	NA	NA	NA	NA	0.934426	NA	0.969828	NA
scaffold_12:812048-812081	A3SS	1	1	1	0.99115	1	1	1	0.987805	0.856115
scaffold_12:812102-812130	Cassette	0	0	0	0.00884956	0.00294985	0	0	0.0121951	0.173611
scaffold_12:850615-850688	IR	1	1	NA	NA	0.95122	1	0.956522	0.9375	0.6
scaffold_12:851138-851162	A3SS	NA	NA	0	0	NA	NA	NA	NA	0.454545
scaffold_12:852140-852205	IR	0.904412	1	1	0.987234	0.990826	0.987179	0.995968	0.991501	NA
scaffold_12:859716-859774	IR	0.875	NA	NA	0.714286	NA	NA	NA	0.692308	NA
scaffold_12:866266-866291	A3SS	0.904762	0.882353	0.967033	0.869767	0.921053	0.932961	0.797386	0.899329	0.875
scaffold_12:879467-879525	IR	0.875	1	0.923077	NA	NA	0.901235	0.997442	0.976	0.97006
scaffold_12:879740-879830	A5SS	0.993827	1	0.916667	0.531915	0.446429	0.931129	NA	0.898305	0.953846
scaffold_12:879847-879885	A3SS	0.00617284	0	0.0833333	0.468085	0.561404	0.0688705	0.126316	0.102128	0.0461538
scaffold_12:881446-881461	A5SS	1	1	0.967742	0.611465	0.658824	0.959933	0.876588	0.908517	0.978558
scaffold_12:881502-881513	A3SS	0	0	0.0322581	0.388535	0.341176	0.0400668	0.123412	0.0914826	0.0214425
scaffold_12:889177-889263	IR	0.75	0.998478	0.994841	0.994121	0.99641	0.993906	0.984808	0.775862	0.814815
scaffold_12:890086-890151	IR	NA	0.923077	0.75	0.373984	0.427632	0.271605	0.503704	0.622642	NA
scaffold_12:890151-890307	A3SS	NA	NA	1	0.842857	0.892216	0.930435	NA	NA	NA
scaffold_12:890259-890307	IR	0.568862	1	0.883721	0.907407	0.935982	0.946746	0.926752	0.87218	0.786885
scaffold_12:890307-890319	A3SS	0.904255	NA	NA	0.898551	0.864407	NA	0.840909	0.692308	NA
scaffold_12:892025-892078	IR	0.0596026	0	0	0.0440252	0.0324826	0.013986	0.0526316	0.0491803	0.032967
scaffold_12:892098-892155	IR	0.208122	0.333333	0.226027	0.262376	NA	0.205882	0.205387	0.269231	0.330709
scaffold_12:892388-892441	IR	0.230366	0.35	0.10084	0.212698	0.237762	0.134454	0.208178	0.197183	0.246809
scaffold_12:899479-899632	IR	0.159468	0.333333	0.0932203	0.478827	0.494652	0.536585	0.497863	0.490909	0.315789
scaffold_12:902804-902857	Cassette	0.0289017	0	0.031746	0.0135135	0.0209424	0.00930233	0.0833333	0.11985	0.226519
scaffold_12:907975-908038	IR	0.807692	NA	NA	NA	NA	NA	NA	NA	0.857143
scaffold_12:927890-927948	IR	0.00421941	0	0.00141443	0.0106122	0.00414651	0.0395257	0.0748899	0.00815851	0.0217391
scaffold_12:944401-944487	A3SS	0.0740741	NA	NA	NA	NA	NA	NA	NA	0
scaffold_12:953737-953763	A3SS	0.0780142	0	0	0.0144928	0.0123967	0.0221239	0.0641509	0.0291262	0.0363636
scaffold_12:953737-953763	A5SS	0.0780142	0	0	0.0144928	0.0123967	0.0221239	NA	0.0291262	0.0363636
scaffold_12:956264-956279	A5SS	NA	NA	NA	0.125984	0.512821	0.357143	0.229508	0.769231	1
scaffold_12:958281-958333	IR	0.147826	0	0.0135135	0.0517928	0.0428016	0.0921986	0.138211	0.0384615	0.0368421
scaffold_12:965071-965135	IR	0.875	NA	NA	NA	NA	NA	NA	0.782609	NA
scaffold_12:965811-965863	IR	0.944444	1	1	1	0.982036	0.911243	0.978723	0.906977	0.818182
scaffold_12:969461-969520	IR	1	1	1	1	1	1	1	0.999268	0.717967
scaffold_12:971543-971593	Cassette	0.0108303	NA	NA	NA	0.0164384	0.104235	0.0833333	0.0189702	NA
scaffold_12:971543-971623	AltStart	NA	0	0	0.011396	0.0164384	0.104235	0.0833333	0.0189702	0.0108696
scaffold_12:981177-981236	IR	0	0.0333333	0.00591716	0.0140187	0.025641	0.0233393	0.0258621	0.606918	0.693642
scaffold_12:994618-994677	IR	0.966216	NA	NA	NA	NA	NA	NA	0.948276	0.909091
scaffold_12:997400-997462	IR	0.0492958	0	0	0	0.0210843	0.0078125	0	0.00934579	0.159292
scaffold_12:999147-999179	A3SS	0.805556	NA	NA	NA	NA	0.5	NA	NA	NA
scaffold_12:999212-999240	A5SS	0.166667	NA	NA	NA	NA	0.5	NA	NA	NA
scaffold_13:1013351-1013357	A5SS	0	0	0	0.0277778	0.0238095	0.0421053	0.0909091	0.143939	0.304348
scaffold_13:1013402-1013412	A3SS	1	1	1	0.972222	0.97619	0.957895	0.909091	0.856061	0.695652
scaffold_13:1017354-1017495	A5SS	NA	NA	NA	NA	NA	NA	0.948718	1	NA
scaffold_13:1018771-1018779	A3SS	0.211382	0.0638298	0.0180879	NA	NA	NA	0.0613811	0.0755814	0.0224719
scaffold_13:1018771-1018779	A5SS	0.211382	0.0638298	0.0180879	0.0918367	0.0727532	0.0887097	0.0613811	0.0755814	0.0224719
scaffold_13:118407-118592	IR	0.0408163	0	0.0434783	0.00704225	0.0231214	0.0833333	0.0425532	0.544248	0.196172
scaffold_13:228882-228976	IR	0.666667	0.5	0.269841	0.531381	0.526531	0.808511	0.590717	0.660969	0.840149
scaffold_13:229766-229838	IR	NA	NA	NA	0.99095	0.995708	0.989975	NA	0.909091	0.962366
scaffold_13:230671-230720	A3SS	NA	NA	NA	1	0.981481	0.971591	NA	0.904762	0.913386
scaffold_13:239522-239595	A5SS	NA	NA	NA	NA	0.428571	NA	0.866667	NA	NA
scaffold_13:239661-239692	A3SS	NA	NA	NA	NA	0.615385	NA	0.133333	NA	NA
scaffold_13:250853-250924	IR	0.785714	NA	NA	NA	NA	NA	0.9	0.883721	0.867925
scaffold_13:308670-308702	Cassette	0	0	0.00806452	0.00257732	0.014531	0.00490998	0.0100937	0.0252525	0.1
scaffold_13:310296-310355	IR	0	0	0	0.00107411	0.00475342	0.00246103	0.0114571	0.00547945	0.759494
scaffold_13:324304-324361	IR	0.43038	0.142857	0.236842	0.316176	0.256098	0.365591	0.492611	0.297521	0.375661
scaffold_13:36665-36719	IR	0.961538	0.230769	0.594595	0	0.238095	0.37037	0.466667	0.592857	0.464286
scaffold_13:372557-372612	IR	NA	NA	NA	NA	NA	NA	0.529412	1	NA
scaffold_13:387256-387405	A3SS	0.0645161	NA	0.0601504	NA	NA	0.0405405	NA	0.0285714	0.0810811
scaffold_13:419245-419552	IR	0.918367	0.923077	0.967033	0.997602	0.99635	0.958955	0.983834	1	1
scaffold_13:424223-424469	Cassette	0.982143	0.932692	0.991202	0.995907	0.998035	0.982143	1	1	1
scaffold_13:434467-434475	A3SS	0.269231	0	0.044586	0.0846154	0.091195	0.0867769	0.10177	0.123188	0.0561798
scaffold_13:435056-435136	IR	0.355556	0	0.125	0.194774	0.191943	0.245902	0.29235	0.146718	0.188679
scaffold_13:440204-440304	A3SS	0.941176	NA	NA	0	0	NA	0	NA	0.000293513
scaffold_13:440224-440304	AltStart	0.941176	NA	NA	0	0	NA	0	0	0.0002936
scaffold_13:441109-441126	A5SS	0.935484	NA	NA	NA	0	NA	0	NA	NA
scaffold_13:441180-441191	A3SS	0.833333	NA	NA	NA	0	NA	0	NA	NA
scaffold_13:445255-445262	A3SS	0.880952	1	1	0.93662	0.993243	0.945833	0.891213	0.945312	0.950495
scaffold_13:447493-447561	IR	1	1	1	1	1	1	1	0.994764	0.93037
scaffold_13:451492-451563	IR	1	0.888889	0.96875	NA	0.963855	0.971963	0.986395	0.970588	0.984694
scaffold_13:462386-462424	A5SS	0.979167	1	1	1	1	0.991189	0.921569	0.875	0.9875
scaffold_13:462480-462494	A5SS	0.957447	0.833333	0.666667	0.949153	0.822222	0.915179	0.957447	1	0.987342
scaffold_13:462670-462722	A5SS	NA	NA	NA	NA	NA	1	NA	NA	0.857143
scaffold_13:464384-464399	A3SS	0.221198	0.551948	0.288043	0.216783	NA	0.340819	0.257724	0.0662252	0.0442136
scaffold_13:464384-464399	A5SS	0.221198	0.551948	0.288043	0.216783	NA	0.340819	0.257724	0.0662252	0.0442136
scaffold_13:464399-464448	A3SS	0	NA	NA	0.015873	0.0393701	0	0.00291545	0.0909091	0.00666667
scaffold_13:477938-477956	A5SS	0.928571	NA	NA	1	NA	NA	NA	NA	NA
scaffold_13:478004-478035	Cassette	0.1875	NA	NA	0.655172	NA	NA	NA	NA	NA
scaffold_13:521426-521476	IR	0.0378378	0.0555556	0.0339806	0.0194805	0.0306905	0.0223881	0.0726257	0.029703	0.0217391
scaffold_13:522219-522237	A5SS	0.444444	NA	NA	NA	0	NA	NA	NA	NA
scaffold_13:522219-522279	IR	0.916667	1	NA	NA	NA	NA	NA	NA	NA
scaffold_13:522333-522357	A5SS	0.5	NA	NA	0.951923	0.983968	0.997812	0.986607	0.866667	NA
scaffold_13:522402-522414	A3SS	0.5	NA	NA	0.0480769	0.0160643	0.00218818	0.0133929	0.133333	NA
scaffold_13:522402-522414	A5SS	NA	NA	NA	0.0480769	0.0160643	0.00218818	0.0133929	0.133333	0.04
scaffold_13:522509-522526	A5SS	NA	NA	NA	NA	0.0212766	NA	NA	NA	0.875
scaffold_13:522667-522739	IR	0.533333	NA	NA	NA	1	NA	NA	NA	NA
scaffold_13:523337-523353	A3SS	0.5	NA	NA	NA	0.985294	0.998156	NA	NA	NA
scaffold_13:523398-523415	A5SS	0.5	NA	NA	NA	0.0147059	0.00138376	NA	NA	NA
scaffold_13:538458-538483	A5SS	NA	NA	NA	0.6	NA	NA	0.37931	NA	NA
scaffold_13:538640-538648	A5SS	NA	NA	NA	0.944444	NA	NA	1	NA	NA
scaffold_13:548658-548725	IR	0.105263	0	0.0119048	0.0372493	0.0119863	0.0174927	0.0274314	0	0
scaffold_13:556026-556084	IR	0.384615	0.5	0.114286	0.163265	0.0630631	0.0833333	0.165354	0.26601	0.351648
scaffold_13:557747-557758	A3SS	0	0	0	0	0.0263158	0.0307692	0.0310078	0.0761905	0
scaffold_13:576278-576289	A5SS	1	NA	NA	1	0.904762	0.969697	0.96875	0.993377	NA
scaffold_13:578102-578109	A5SS	0	NA	NA	NA	NA	NA	NA	0.8	NA
scaffold_13:591467-591530	IR	0.0614844	0.0434783	0.0194175	0.0763359	0.114583	0.107581	0.043273	0.064	0.0643564
scaffold_13:592975-592980	A5SS	NA	NA	0.818182	0.933333	0.939394	0.930233	0.98913	0.985075	0.946381
scaffold_13:595178-595183	A3SS	NA	NA	NA	0.0412371	NA	NA	0.0909091	NA	0.0286738
scaffold_13:598974-598991	A5SS	NA	NA	NA	NA	NA	0.333333	0.0967742	NA	NA
scaffold_13:605889-605933	A3SS	0	0	0	0.00355872	0	0.00446429	0	0	0.430657
scaffold_13:606130-606187	A3SS	0	0	0	0	0	0.00938967	0	0	0.573034
scaffold_13:606199-606244	A5SS	1	1	1	1	1	0.99061	1	1	0.426966
scaffold_13:621224-621229	A5SS	0.336735	1	0.99359	0.986517	0.996219	0.988889	0.992754	0.809013	0.558824
scaffold_13:621277-621296	A3SS	0.663265	0	0.00641026	0.0134831	0.00378072	0.0111111	0.00724638	0.190987	0.441176
scaffold_13:621401-621423	A5SS	NA	NA	NA	1	NA	1	NA	0.861646	NA
scaffold_13:621471-621482	A3SS	0.488372	0	0	0	0	0	0	0.141361	0.333333
scaffold_13:621567-621584	A5SS	0.954545	1	1	0.998459	1	1	1	0.873171	0.670139
scaffold_13:621626-621641	A3SS	0.0454545	0	0	0.00154083	0	0	0	0.128247	0.33218
scaffold_13:622320-622355	A5SS	0	0	0.00389105	0	0	0	0	0.0512224	0.135593
scaffold_13:622373-622413	A3SS	1	1	0.996109	1	1	1	1	0.94213	0.842975
scaffold_13:625026-625081	IR	NA	NA	NA	0.9	0.833333	0.882353	0.932203	NA	NA
scaffold_13:630636-630649	A3SS	0.489726	0.571429	0.701149	0.613426	0.611111	0.582192	0.590909	0.721223	0.676471
scaffold_13:640011-640033	A3SS	NA	NA	NA	0.571429	NA	0.0769231	0.411765	0.714286	0.692308
scaffold_13:647632-647640	A3SS	0.257576	0	0.0740741	0.0119048	0	0.0204082	0.0431034	0.010101	0
scaffold_13:647632-647689	IR	0.246154	0.142857	0.0740741	0.0674157	0.10101	0.127273	0.165414	0.029703	0.0526316
scaffold_13:658345-658416	IR	0.8	1	1	NA	NA	NA	NA	NA	0.894737
scaffold_13:670873-670879	A5SS	NA	NA	NA	0.0888889	0.272727	NA	NA	0.0325203	NA
scaffold_13:670933-670955	A3SS	NA	NA	NA	0.0952381	0.285714	NA	NA	NA	NA
scaffold_13:685845-685862	A3SS	0.0745763	0	0.00784314	0.00925926	0.0233161	0.0214286	0.0179283	0.0160428	0.0175953
scaffold_13:710458-710542	IR	0.677348	0.862434	0.744204	0.886057	0.906465	0.852518	0.953846	0.885161	0.818182
scaffold_13:711579-711588	Cassette	0.9375	1	0.909091	0.933333	0.916667	0.975207	0.666667	0.98778	0.970205
scaffold_13:717399-717416	A5SS	0.375	NA	NA	NA	NA	0.714286	0.648649	0.777778	NA
scaffold_13:717399-717462	A3SS	NA	NA	NA	NA	0.130435	NA	NA	0.75	NA
scaffold_13:717416-717521	A5SS	0.357143	NA	NA	NA	NA	0.153846	NA	NA	NA
scaffold_13:717462-717521	A3SS	0.689655	NA	NA	NA	0.645161	NA	NA	NA	NA
scaffold_13:717462-717521	A5SS	0.689655	NA	NA	0.692308	0.645161	0.755556	NA	0.241379	0.269231
scaffold_13:717462-717561	Cassette	NA	NA	NA	NA	NA	NA	NA	0.783784	0.834951
scaffold_13:717521-717561	Cassette	NA	NA	NA	NA	0.666667	NA	0.818182	0.692308	NA
scaffold_13:717562-717608	A5SS	NA	NA	NA	NA	NA	NA	0.857143	1	NA
scaffold_13:722114-722165	IR	0.725806	1	0.971429	0.991404	0.989691	1	0.995475	NA	0.995025
scaffold_13:722714-722765	IR	0.822222	NA	NA	NA	NA	NA	NA	0.972222	NA
scaffold_13:724019-724068	IR	0.107317	0	0.0769231	0.111111	0.02	0.037037	0.171429	0.150538	0.148718
scaffold_13:736204-736270	IR	1	1	1	0.992366	1	1	1	0.753846	0.759375
scaffold_13:740538-740565	Cassette	0.478261	NA	NA	NA	NA	NA	NA	NA	0.12
scaffold_13:745779-745844	IR	0.0984848	0.0222222	0.0193165	0.0734597	0.116279	0.1	0.0744681	0.0546139	0.564286
scaffold_13:754716-754778	IR	0.965517	1	1	0.988909	0.996639	1	0.973154	0.987965	0.940439
scaffold_13:776171-776224	IR	0.0337711	0.108696	0.0526316	0.0512821	0	0.0734266	0.013245	0.0373134	0.04
scaffold_13:785215-785273	IR	0.879898	0.910112	0.942708	0.938559	0.946945	0.923858	0.971275	0.975741	0.990893
scaffold_13:785576-785585	A3SS	NA	0.914286	0.915888	0.942197	0.894866	0.933522	0.856209	NA	NA
scaffold_13:785576-785588	A3SS	0.973214	1	0.98	0.978979	0.989189	0.995475	1	0.953052	0.926724
scaffold_13:796609-796679	IR	0.956123	0.878049	0.953668	0.962175	0.963519	0.96264	0.994426	0.984748	0.986861
scaffold_13:815888-815944	IR	0.0689655	0	0.00980392	0.0199601	0.0220472	0.0267857	0.0376176	0.013289	0.015873
scaffold_13:821902-821963	IR	0.0483871	0	0.01875	0.0588235	0.0322034	0.069697	0.059501	0.0413695	0.0592384
scaffold_13:824104-824118	A3SS	1	0.809524	0.846154	0.907975	0.857143	0.933333	0.893939	0.890909	0.875
scaffold_13:848038-848056	A3SS	0.978571	1	0.967742	0.990566	0.996212	1	0.969231	1	0.928571
scaffold_13:857341-857392	IR	0.777778	0.833333	0.857143	0.833333	0.814815	0.894737	0.818182	0.884615	0.909091
scaffold_13:857693-857753	IR	0.389313	0	0.0549451	0.173789	0.184848	0.287273	0.323651	0.165877	0.18
scaffold_13:858480-858534	IR	0.363014	0	0.0491228	0.101732	0.0931264	0.150725	0.133562	0.103571	0.132075
scaffold_13:859685-859691	A3SS	0.127049	0.0869565	0.1	0.110843	0.136646	0.104962	0.0613108	0.0792952	0.0963855
scaffold_13:859685-859701	A3SS	0.95679	NA	NA	NA	0.956522	0.948276	NA	NA	NA
scaffold_13:865437-865662	A5SS	NA	NA	NA	NA	NA	NA	NA	0.833333	1
scaffold_13:898591-898648	IR	0.896552	NA	NA	NA	NA	NA	NA	0.9375	NA
scaffold_13:907577-907588	A5SS	0.714286	1	0.9625	0.992593	0.992565	0.830986	0.948718	0.93617	NA
scaffold_13:907629-907649	A3SS	NA	NA	0.0375	0.00740741	0.00743494	0.174825	0.0553191	0.0833333	0.797297
scaffold_13:908387-908451	IR	0.666667	0.9	0.966667	0.990476	0.984293	0.929379	0.91723	0.972868	0.420502
scaffold_13:925952-925959	A5SS	NA	NA	0.964912	NA	0.969697	0.948718	0.965517	0.938931	NA
scaffold_13:930183-930234	IR	0.233483	1	0.882353	0.989362	1	0.969639	1	1	0.977273
scaffold_13:936128-936180	IR	0.0158014	0.0555556	0.0408163	0.015625	0.00291545	0.0336658	0	0	0
scaffold_13:940960-940977	A3SS	0.0574713	NA	NA	0.942308	NA	0.995392	0.991031	NA	NA
scaffold_13:951532-951554	A3SS	NA	NA	NA	NA	NA	0.625	0.333333	NA	NA
scaffold_13:951721-951794	A5SS	NA	NA	NA	0.9	NA	NA	NA	NA	1
scaffold_13:951721-951815	MXE	0.733333	NA	0.75	NA	0.416667	0.25	NA	NA	NA
scaffold_13:951786-951815	Cassette	NA	NA	0.833333	NA	NA	NA	0.952055	0.946237	NA
scaffold_13:951909-952009	A5SS	NA	NA	0.478261	0.148148	0.170213	0.328947	0.174603	0.330357	0.409091
scaffold_13:952009-952062	Cassette	0.982428	0.965517	0.923729	0.987624	0.988839	0.992095	0.993464	0.978402	1
scaffold_13:990638-990693	IR	0.956929	0.897959	0.93617	0.925926	0.963855	0.963455	0.961924	0.948854	0.929167
scaffold_13:993211-993273	IR	0.724138	NA	NA	NA	0.904762	NA	NA	NA	NA
scaffold_15:47572-47607	A3SS	NA	NA	NA	NA	NA	0.988848	NA	0.416667	NA
scaffold_15:47572-47607	A5SS	NA	NA	NA	0.964602	0.983051	0.988848	0.997753	0.416667	NA
scaffold_15:47648-47664	A3SS	NA	NA	NA	0.0396476	0.0234899	0.011236	0.00561167	0.583333	NA
scaffold_15:47648-47664	A5SS	NA	NA	NA	NA	NA	0.011236	NA	0.583333	NA
scaffold_15:52352-52415	IR	0.724444	0.833333	0.742105	0.54	0.503132	0.524752	0.631027	0.467756	0.673349
scaffold_15:71183-71210	A3SS	0.975309	0.924528	0.889908	0.926526	0.958592	0.94697	0.959748	0.963454	0.975689
scaffold_15:88411-88771	IR	0.560484	1	1	NA	NA	NA	NA	NA	NA
scaffold_15:89099-89118	A3SS	0.577778	NA	NA	0	0	0	0	0	0
scaffold_15:89161-89169	A5SS	0.431818	1	1	1	1	1	1	1	1
scaffold_16:29441-29463	A3SS	0.441315	0.676329	0.572016	0.57971	0.570888	0.606548	0.478036	0.371951	0.394958
scaffold_16:46834-46902	IR	0	0.1	0.0100756	0.022449	0.021164	0.0165631	0.0684932	0.0162162	0.04375
scaffold_16:46995-47056	IR	0	0.153846	0.015748	0.0385051	0.0279163	0.0312076	0.0810313	0.0202343	0.0278746
scaffold_16:92382-92387	A3SS	NA	NA	NA	0.833333	0.875	NA	NA	NA	NA
scaffold_16:96213-96269	IR	0.0833333	0	0.172414	0.25	0.269091	0.296089	0.340961	0.137681	0.333333
scaffold_17:12787-12843	A3SS	NA	NA	NA	0.993243	0.990881	0.976077	0.982079	0.943262	NA
scaffold_17:23715-23771	IR	1	1	1	1	1	1	1	1	0.745098
scaffold_17:54363-54425	IR	0.837179	0.945455	0.972222	0.897959	0.909513	0.861893	0.868167	0.79771	0.846154
[truncated: 4,870 more rows]
