# Supplementary material for: The Genome-Wide Characterization of Alternative Splicing and RNA Editing in the Development of Coprinopsis cinerea
Source: J Fungi (Basel). 2023 Sep 9;9(9):915. doi: 10.3390/jof9090915 (PMC10532568; doi:10.3390/jof9090915)
Supplement: Supplementary file 1 [file jof-09-00915-s001.zip › DatasetS3_Alternative_splicing.exp5.minor05.jad6.feature.xlsx]

## Sheet: Alternative_splicing.exp5.minor
Location	exon	geneID	strand
scaffold_1:1002193-1002250	8	CC2G_000398	-
scaffold_1:1005087-1005148	1-2	CC2G_000399	-
scaffold_1:1009410-1009742	8	CC2G_000401	+
scaffold_1:1018250-1018296	2	CC2G_000405	-
scaffold_1:1019090-1019150	1	CC2G_000405	-
scaffold_1:1023263-1023309	1	CC2G_000408	-
scaffold_1:1023309-1023370	1	CC2G_000408	-
scaffold_1:1023370-1023374	1	CC2G_000408	-
scaffold_1:1025398-1025407	4	CC2G_000410	+
scaffold_1:1025398-1025407	4	CC2G_000410	+
scaffold_1:1025398-1025410	4	CC2G_000410	+
scaffold_1:1036277-1036335	5	CC2G_000413	-
scaffold_1:1046902-1046955	23	CC2G_000415	+
scaffold_1:1051323-1051376	4	CC2G_000418	+
scaffold_1:1054737-1054778	3	CC2G_000420	-
scaffold_1:1054794-1054834	3	CC2G_000420	-
scaffold_1:1059625-1059675	1	CC2G_000422	+
scaffold_1:1064368-1064378	13	CC2G_000424	-
scaffold_1:1064419-1064433	13	CC2G_000424	-
scaffold_1:1070688-1070773	2	CC2G_000426	-
scaffold_1:1070714-1070773	2	CC2G_000426	-
scaffold_1:1071257-1071274	7	CC2G_000427	-
scaffold_1:1071322-1071331	6	CC2G_000427	-
scaffold_1:1079913-1079939	2	CC2G_000430	-
scaffold_1:1079973-1079987	1	CC2G_000430	-
scaffold_1:1086320-1086348	4	CC2G_000433	-
scaffold_1:1087999-1088126	1	CC2G_000433	-
scaffold_1:1097778-1097839	7	CC2G_000439	+
scaffold_1:1109655-1109736	9	CC2G_000445	-
scaffold_1:1111594-1111811	7	CC2G_000445	-
scaffold_1:1111822-1111868	7	CC2G_000445	-
scaffold_1:1134880-1134935	5	CC2G_000455	-
scaffold_1:1135039-1135076	5	CC2G_000455	-
scaffold_1:1135039-1135130	5	CC2G_000455	-
scaffold_1:1136495-1136500	2	CC2G_000455	-
scaffold_1:1136509-1136553	1	CC2G_000455	-
scaffold_1:1137257-1137309	17	CC2G_000456	-
scaffold_1:1150147-1150199	2	CC2G_000460	-
scaffold_1:1160190-1160204	2	CC2G_000466	-
scaffold_1:1160245-1160259	2	CC2G_000466	-
scaffold_1:1160245-1160259	2	CC2G_000466	-
scaffold_1:1161166-1161177	2	CC2G_000467	-
scaffold_1:1161166-1161177	2	CC2G_000467	-
scaffold_1:1161220-1161263	2	CC2G_000467	-
scaffold_1:1161220-1161263	2	CC2G_000467	-
scaffold_1:1161462-1161503	1	CC2G_000467	-
scaffold_1:1161462-1161503	1	CC2G_000467	-
scaffold_1:1161522-1161552	1	CC2G_000467	-
scaffold_1:1161522-1161558	1	CC2G_000467	-
scaffold_1:1161522-1161558	1	CC2G_000467	-
scaffold_1:1161558-1161626	1	CC2G_000467	-
scaffold_1:1163129-1163162	1	CC2G_000468	+
scaffold_1:1163551-1163565	4	CC2G_000468	+
scaffold_1:1163551-1163565	4	CC2G_000468	+
scaffold_1:1163843-1163851	6	CC2G_000468	+
scaffold_1:1163851-1163902	6	CC2G_000468	+
scaffold_1:1164059-1164084	7	CC2G_000468	+
scaffold_1:1164059-1164084	7	CC2G_000468	+
scaffold_1:1164125-1164138	7	CC2G_000468	+
scaffold_1:1164125-1164138	7	CC2G_000468	+
scaffold_1:1170585-1170614	2	CC2G_000471	+
scaffold_1:1174894-1174913	2	CC2G_000474	-
scaffold_1:1174894-1174913	2	CC2G_000474	-
scaffold_1:1175026-1175037	1	CC2G_000474	-
scaffold_1:1175026-1175037	1	CC2G_000474	-
scaffold_1:1175116-1175178	1	CC2G_000474	-
scaffold_1:1185623-1185726	4	CC2G_000479	-
scaffold_1:1191274-1191334	6	CC2G_000480	+
scaffold_1:1203076-1203135	3	CC2G_000486	+
scaffold_1:1203130-1203160	3	CC2G_000486	+
scaffold_1:1203135-1203160	3	CC2G_000486	+
scaffold_1:1203200-1203212	3	CC2G_000486	+
scaffold_1:1207511-1207553	2	CC2G_000487	-
scaffold_1:1207756-1207809	2	CC2G_000487	-
scaffold_1:1212018-1212075	1	CC2G_000489	-
scaffold_1:1213109-1213168	8	CC2G_000491	-
scaffold_1:1213173-1213223	7	CC2G_000491	-
scaffold_1:1213173-1213235	6	CC2G_000491	-
scaffold_1:1216350-1216423	4	CC2G_000492	+
scaffold_1:1218196-1218212	4	CC2G_000493	-
scaffold_1:1226216-1226231	1	CC2G_000497	+
scaffold_1:1248480-1248548	2	CC2G_000506	-
scaffold_1:1249367-1249426	2	CC2G_000507	+
scaffold_1:1259575-1259636	3	CC2G_000509	-
scaffold_1:1269783-1269790	5	CC2G_000512	-
scaffold_1:1269830-1269867	5	CC2G_000512	-
scaffold_1:1270975-1271030	1	CC2G_000513	+
scaffold_1:1273903-1273961	8	CC2G_000514	+
scaffold_1:1273921-1273961	8	CC2G_000514	+
scaffold_1:1282739-1282801	2	CC2G_000518	-
scaffold_1:1290573-1290582	2	CC2G_000522	-
scaffold_1:1293223-1293282	2	CC2G_000523	+
scaffold_1:1293710-1293728	2-3	CC2G_000523	+
scaffold_1:1295394-1295448	5	CC2G_000523	+
scaffold_1:1297352-1297410	15	CC2G_000524	-
scaffold_1:1309532-1309643	1	CC2G_000528	+
scaffold_1:1309830-1309858	5	CC2G_000527	+
scaffold_1:1309905-1309918	1	CC2G_000528	+
scaffold_1:1317450-1317465	4	CC2G_000530	-
scaffold_1:1317494-1317541	4	CC2G_000530	-
scaffold_1:1321316-1321367	1	CC2G_000532	+
scaffold_1:132460-132475	1	CC2G_000050	+
scaffold_1:1327633-1327680	10	CC2G_000533	+
scaffold_1:1327691-1327717	10	CC2G_000533	+
scaffold_1:1330428-1330433	2	CC2G_000534	+
scaffold_1:1330596-1330601	4	CC2G_000534	+
scaffold_1:1331286-1331348	7	CC2G_000534	+
scaffold_1:1335879-1335945	1	CC2G_000536	+
scaffold_1:1338849-1338907	2	CC2G_000537	-
scaffold_1:1339662-1339721	1	CC2G_000538	+
scaffold_1:1339744-1339801	1	CC2G_000538	+
scaffold_1:1340944-1341169	1	CC2G_000539	+
scaffold_1:1341169-1341182	1	CC2G_000539	+
scaffold_1:1341169-1341256	1	CC2G_000539	+
scaffold_1:134232-134297	15	CC2G_000051	-
scaffold_1:1367543-1367590	10	CC2G_000548	+
scaffold_1:1367599-1367646	10	CC2G_000548	+
scaffold_1:1375941-1375994	3	CC2G_000552	-
scaffold_1:1386399-1386451	3	CC2G_000558	+
scaffold_1:1389305-1389357	7	CC2G_000558	+
scaffold_1:1389935-1389945	2	CC2G_000559	-
scaffold_1:1396420-1396536	3	CC2G_000563	-
scaffold_1:1397345-1397350	1	CC2G_000563	-
scaffold_1:140590-140598	2	CC2G_000053	+
scaffold_1:1407073-1407102	3	CC2G_000570	+
scaffold_1:1407637-1407723	4	CC2G_000570	+
scaffold_1:1411188-1411221	1	CC2G_000571	-
scaffold_1:1411188-1411221	1	CC2G_000571	-
scaffold_1:1413894-1413905	8	CC2G_000572	+
scaffold_1:1416287-1416348	12	CC2G_000572	+
scaffold_1:1418586-1418592	6	CC2G_000574	-
scaffold_1:1418648-1418655	6	CC2G_000574	-
scaffold_1:1424657-1424714	8	CC2G_000577	-
scaffold_1:1424771-1424832	8	CC2G_000577	-
scaffold_1:1426357-1426370	1	CC2G_000578	+
scaffold_1:1433872-1433877	2	CC2G_000582	-
scaffold_1:1439978-1440002	9	CC2G_000586	+
scaffold_1:1447934-1447986	11	CC2G_000588	+
scaffold_1:1447934-1447986	11	CC2G_000588	+
scaffold_1:1447992-1448046	12	CC2G_000588	+
scaffold_1:1447992-1448046	12	CC2G_000588	+
scaffold_1:1450767-1450783	1	CC2G_000591	+
scaffold_1:1450771-1450783	1	CC2G_000591	+
scaffold_1:1450831-1450838	1	CC2G_000591	+
scaffold_1:1453704-1453761	5	CC2G_000592	+
scaffold_1:1455770-1455826	4	CC2G_000594	-
scaffold_1:1455850-1455864	3	CC2G_000594	-
scaffold_1:1455850-1455904	3	CC2G_000594	-
scaffold_1:1455904-1455915	3	CC2G_000594	-
scaffold_1:1455922-1455969	2	CC2G_000594	-
scaffold_1:1459926-1459983	6	CC2G_000595	+
scaffold_1:1480440-1480495	1	CC2G_000602	-
scaffold_1:1480927-1480975	2	CC2G_000603	+
scaffold_1:1488131-1488183	4	CC2G_000606	+
scaffold_1:1490424-1490429	3	CC2G_000608	+
scaffold_1:1490983-1491042	8	CC2G_000608	+
scaffold_1:1491098-1491115	9	CC2G_000608	+
scaffold_1:1497400-1497434	2	CC2G_000612	-
scaffold_1:1497400-1497437	2	CC2G_000612	-
scaffold_1:1497437-1497492	2	CC2G_000612	-
scaffold_1:1517466-1517537	3	CC2G_000621	+
scaffold_1:1521829-1521899	2	CC2G_000623	-
scaffold_1:1521829-1521899	2	CC2G_000623	-
scaffold_1:1521900-1521950	1	CC2G_000623	-
scaffold_1:1521900-1521950	1	CC2G_000623	-
scaffold_1:1529776-1529828	1	CC2G_000625	-
scaffold_1:1529793-1529828	1	CC2G_000625	-
scaffold_1:1529793-1529828	1	CC2G_000625	-
scaffold_1:1533437-1533494	6	CC2G_000627	+
scaffold_1:1533575-1533624	6	CC2G_000627	+
scaffold_1:1550119-1550205	1	CC2G_000635	-
scaffold_1:1550193-1550205	1	CC2G_000635	-
scaffold_1:1554636-1554708	4	CC2G_000637	+
scaffold_1:1554745-1554800	4	CC2G_000637	+
scaffold_1:1561930-1561983	2	CC2G_000641	+
scaffold_1:156209-156265	4	CC2G_000062	-
scaffold_1:1562343-1562407	3	CC2G_000641	+
scaffold_1:156331-156393	4	CC2G_000061	+
scaffold_1:156331-156393	4	CC2G_000061	+
scaffold_1:156402-156486	3	CC2G_000062	-
scaffold_1:156402-156486	3	CC2G_000062	-
scaffold_1:1564943-1565040	1	CC2G_000642	-
scaffold_1:156653-156718	3	CC2G_000062	-
scaffold_1:156813-156867	3	CC2G_000062	-
scaffold_1:157005-157011	3	CC2G_000062	-
scaffold_1:157005-157036	3	CC2G_000062	-
scaffold_1:1570987-1571040	6	CC2G_000645	-
scaffold_1:1573083-1573163	3	CC2G_000645	-
scaffold_1:1573234-1573243	2-3	CC2G_000645	-
scaffold_1:1573290-1573313	2	CC2G_000645	-
scaffold_1:157697-157766	1	CC2G_000062	-
scaffold_1:1584296-1584326	1	CC2G_000651	+
scaffold_1:1586525-1586583	2	CC2G_000653	-
scaffold_1:1587976-1588030	2	CC2G_000653	-
scaffold_1:1590563-1590571	2	CC2G_000654	+
scaffold_1:1592421-1592475	2	CC2G_000654	+
scaffold_1:1595892-1595938	3	CC2G_000657	-
scaffold_1:1595892-1595938	3	CC2G_000657	-
scaffold_1:1597051-1597104	5	CC2G_000658	+
scaffold_1:1622155-1622205	7	CC2G_000669	+
scaffold_1:1633049-1633116	4	CC2G_000674	-
scaffold_1:1640205-1640262	3	CC2G_000677	+
scaffold_1:1641762-1641767	5	CC2G_000678	+
scaffold_1:1641865-1641896	5	CC2G_000678	+
scaffold_1:1641865-1641896	5	CC2G_000678	+
scaffold_1:1641887-1641896	5	CC2G_000678	+
scaffold_1:1641917-1641965	6	CC2G_000678	+
scaffold_1:1641917-1641965	6	CC2G_000678	+
scaffold_1:1642115-1642138	7	CC2G_000678	+
scaffold_1:1642115-1642138	7	CC2G_000678	+
scaffold_1:1642179-1642196	7	CC2G_000678	+
scaffold_1:1642179-1642196	7	CC2G_000678	+
scaffold_1:1642183-1642196	7	CC2G_000678	+
scaffold_1:1642228-1642287	8	CC2G_000678	+
scaffold_1:1643162-1643186	6	CC2G_000679	-
scaffold_1:1643162-1643186	6	CC2G_000679	-
scaffold_1:1651421-1651431	4	CC2G_000682	-
scaffold_1:1651421-1651473	4	CC2G_000682	-
scaffold_1:1651431-1651487	4	CC2G_000682	-
scaffold_1:1651473-1651487	3	CC2G_000682	-
scaffold_1:1651758-1651774	2-3	CC2G_000682	-
scaffold_1:1651808-1651826	2	CC2G_000682	-
scaffold_1:1652074-1652348	1	CC2G_000682	-
scaffold_1:1653242-1653303	5	CC2G_000683	+
scaffold_1:1653585-1653641	5	CC2G_000684	-
scaffold_1:1654547-1654630	4	CC2G_000684	-
scaffold_1:1654547-1654630	4	CC2G_000684	-
scaffold_1:165916-165923	3	CC2G_000067	+
scaffold_1:167126-167210	2	CC2G_000068	+
scaffold_1:167186-167210	2	CC2G_000068	+
scaffold_1:167186-167210	2	CC2G_000068	+
scaffold_1:167459-167478	2	CC2G_000068	+
scaffold_1:167506-167532	2	CC2G_000068	+
scaffold_1:167668-167682	3	CC2G_000068	+
scaffold_1:167700-167718	3	CC2G_000068	+
scaffold_1:1681452-1681507	13	CC2G_000695	+
scaffold_1:1682772-1682797	5	CC2G_000696	-
scaffold_1:1689507-1689512	1	CC2G_000700	+
scaffold_1:1691621-1691631	9	CC2G_000701	-
scaffold_1:1704542-1704575	4	CC2G_000709	+
scaffold_1:1704836-1704847	5	CC2G_000709	+
scaffold_1:1704883-1704941	5	CC2G_000709	+
scaffold_1:1710495-1710555	1	CC2G_000710	-
scaffold_1:1711762-1711820	10	CC2G_000711	+
scaffold_1:1715872-1715922	2	CC2G_000714	+
scaffold_1:1716380-1716391	6	CC2G_000714	+
scaffold_1:1717385-1717396	3	CC2G_000715	+
scaffold_1:1717436-1717448	3	CC2G_000715	+
scaffold_1:1723098-1723147	1	CC2G_000719	+
scaffold_1:1724460-1724523	8	CC2G_000719	+
scaffold_1:1726361-1726435	4	CC2G_000720	+
scaffold_1:1737147-1737210	5	CC2G_000723	-
scaffold_1:1740368-1740454	1	CC2G_000724	+
scaffold_1:1744027-1744087	20	CC2G_000724	+
scaffold_1:1744190-1744199	20	CC2G_000724	+
scaffold_1:1744190-1744199	20	CC2G_000724	+
scaffold_1:1744242-1744255	20	CC2G_000724	+
scaffold_1:1745789-1745804	2	CC2G_000726	-
scaffold_1:1746151-1746222	1	CC2G_000726	-
scaffold_1:1756776-1756781	2	CC2G_000731	-
scaffold_1:1760032-1760113	1	CC2G_000733	+
scaffold_1:1760439-1760505	1	CC2G_000733	+
scaffold_1:178266-178303	2	CC2G_000075	+
scaffold_1:1789092-1789097	8	CC2G_000741	+
scaffold_1:1792058-1792115	12	CC2G_000742	-
scaffold_1:1793774-1793833	5	CC2G_000742	-
scaffold_1:1797894-1797948	3	CC2G_000743	-
scaffold_1:1804120-1804160	4	CC2G_000747	-
scaffold_1:1804173-1804226	4	CC2G_000747	-
scaffold_1:1810025-1810092	4	CC2G_000749	-
scaffold_1:1812096-1812160	4	CC2G_000750	+
scaffold_1:1815887-1815919	3	CC2G_000751	-
scaffold_1:1815887-1815919	3	CC2G_000751	-
scaffold_1:1819859-1819911	6	CC2G_000754	-
scaffold_1:1819933-1819986	6	CC2G_000754	-
scaffold_1:1820168-1820191	5-6	CC2G_000754	-
scaffold_1:1820496-1820549	3	CC2G_000754	-
scaffold_1:1820826-1820883	1	CC2G_000754	-
scaffold_1:1833385-1833442	8	CC2G_000760	-
scaffold_1:1841193-1841209	3	CC2G_000763	-
scaffold_1:1841209-1841228	3	CC2G_000763	-
scaffold_1:1841271-1841338	1	CC2G_000763	-
scaffold_1:1845828-1845866	7	CC2G_000765	+
scaffold_1:1845828-1845866	7	CC2G_000765	+
scaffold_1:1857876-1857883	5-6	CC2G_000770	+
scaffold_1:1857876-1857883	5-6	CC2G_000770	+
scaffold_1:1866242-1866294	2	CC2G_000776	+
scaffold_1:1867324-1867365	3	CC2G_000777	+
scaffold_1:1868646-1868656	7	CC2G_000777	+
scaffold_1:1868710-1868758	8	CC2G_000777	+
scaffold_1:1881807-1881854	10	CC2G_000781	+
scaffold_1:1881863-1881901	10	CC2G_000781	+
scaffold_1:1881909-1881962	11	CC2G_000781	+
scaffold_1:1894163-1894215	6	CC2G_000786	+
scaffold_1:1897369-1897426	2	CC2G_000787	+
scaffold_1:1905931-1906011	9	CC2G_000791	-
scaffold_1:1907423-1907485	1	CC2G_000791	-
scaffold_1:1908108-1908134	1	CC2G_000792	+
scaffold_1:1908134-1908197	2	CC2G_000792	+
scaffold_1:1908171-1908197	2	CC2G_000792	+
scaffold_1:1915035-1915046	7	CC2G_000796	-
scaffold_1:1916435-1916486	1	CC2G_000797	+
scaffold_1:1916485-1916486	1	CC2G_000797	+
scaffold_1:1916485-1916492	1	CC2G_000797	+
scaffold_1:1916485-1916501	1-2	CC2G_000797	+
scaffold_1:1916492-1916501	2	CC2G_000797	+
scaffold_1:1916492-1916536	2	CC2G_000797	+
scaffold_1:1916501-1916536	1-3	CC2G_000797	+
scaffold_1:1916684-1916697	3	CC2G_000797	+
scaffold_1:1923344-1923355	7-8	CC2G_000801	+
scaffold_1:1923344-1923386	7-9	CC2G_000801	+
scaffold_1:1923694-1923750	10-11	CC2G_000801	+
scaffold_1:1925134-1925191	1	CC2G_000802	+
scaffold_1:1928190-1928229	5	CC2G_000803	+
scaffold_1:1928247-1928285	5	CC2G_000803	+
scaffold_1:1939447-1939503	2	CC2G_000808	+
scaffold_1:1939614-1939674	4	CC2G_000808	+
scaffold_1:1939674-1939679	4	CC2G_000808	+
scaffold_1:1943145-1943177	13	CC2G_000809	+
scaffold_1:1943219-1943231	13	CC2G_000809	+
scaffold_1:1951577-1951634	15	CC2G_000811	+
scaffold_1:1955010-1955061	4	CC2G_000813	-
scaffold_1:1957378-1957384	1-2	CC2G_000813	-
scaffold_1:1957378-1957384	1-2	CC2G_000813	-
scaffold_1:1957429-1957476	1	CC2G_000813	-
scaffold_1:1959441-1959497	4	CC2G_000814	+
scaffold_1:1960559-1960615	13	CC2G_000814	+
scaffold_1:1960560-1960622	13	CC2G_000814	+
scaffold_1:1961256-1961305	19	CC2G_000814	+
scaffold_1:1963126-1963178	6	CC2G_000815	+
scaffold_1:1966602-1966613	10	CC2G_000817	+
scaffold_1:1966602-1966613	10	CC2G_000817	+
scaffold_1:196876-196960	2	CC2G_000082	-
scaffold_1:1970632-1970687	17	CC2G_000819	-
scaffold_1:1973450-1973508	8	CC2G_000819	-
scaffold_1:1975525-1975580	1	CC2G_000819	-
scaffold_1:1976884-1976943	5	CC2G_000820	+
scaffold_1:1980227-1980445	1	CC2G_000822	+
scaffold_1:1980976-1981021	6	CC2G_000822	+
scaffold_1:1981626-1981679	7	CC2G_000822	+
scaffold_1:1997657-1997662	3	CC2G_000826	+
scaffold_1:1997657-1997662	3	CC2G_000826	+
scaffold_1:1998872-1998921	11	CC2G_000826	+
scaffold_1:2001084-2001115	2	CC2G_000827	-
scaffold_1:2001145-2001170	1	CC2G_000827	-
scaffold_1:2002164-2002222	3	CC2G_000828	+
scaffold_1:2003380-2003442	2	CC2G_000829	-
scaffold_1:2003871-2003929	1	CC2G_000829	-
scaffold_1:2004266-2004319	1	CC2G_000829	-
scaffold_1:2006385-2006391	5	CC2G_000831	-
scaffold_1:2006385-2006391	5	CC2G_000831	-
scaffold_1:2010297-2010354	7	CC2G_000832	+
scaffold_1:2011853-2011913	1	CC2G_000833	-
scaffold_1:2014823-2014857	1	CC2G_000835	-
scaffold_1:2014823-2014857	1	CC2G_000835	-
scaffold_1:2015586-2015596	1	CC2G_000836	-
scaffold_1:2025215-2025276	12	CC2G_000840	+
scaffold_1:2030159-2030223	2	CC2G_000842	-
scaffold_1:2035892-2035950	8	CC2G_000845	-
scaffold_1:2036080-2036137	7	CC2G_000845	-
scaffold_1:2036304-2036320	6	CC2G_000845	-
scaffold_1:2036359-2036384	6-7	CC2G_000845	-
scaffold_1:2041377-2041431	2	CC2G_000846	-
scaffold_1:2041682-2041729	2	CC2G_000847	+
scaffold_1:2041835-2041885	3	CC2G_000847	+
scaffold_1:2042026-2042049	4	CC2G_000847	+
scaffold_1:2042026-2042049	4	CC2G_000847	+
scaffold_1:2042093-2042102	4	CC2G_000847	+
scaffold_1:2042102-2042120	5	CC2G_000847	+
scaffold_1:2052207-2052244	3	CC2G_000853	+
scaffold_1:2052263-2052299	4	CC2G_000853	+
scaffold_1:2061869-2061916	26	CC2G_000855	+
scaffold_1:2062017-2062023	27	CC2G_000855	+
scaffold_1:2063923-2063974	40	CC2G_000855	+
scaffold_1:2087091-2087171	4	CC2G_000863	-
scaffold_1:2087171-2087239	4	CC2G_000863	-
scaffold_1:2087901-2087907	4	CC2G_000863	-
scaffold_1:2087901-2087907	4	CC2G_000863	-
scaffold_1:2106336-2106382	1	CC2G_000869	-
scaffold_1:2106674-2106685	1	CC2G_000870	+
scaffold_1:2106674-2106688	1	CC2G_000870	+
scaffold_1:2106685-2106688	1	CC2G_000870	+
scaffold_1:2106688-2106748	1	CC2G_000870	+
scaffold_1:2107966-2107989	9	CC2G_000870	+
scaffold_1:2114981-2115028	1	CC2G_000875	+
scaffold_1:2114991-2115028	1	CC2G_000875	+
scaffold_1:2115037-2115097	1	CC2G_000875	+
scaffold_1:2115860-2115881	3	CC2G_000875	+
scaffold_1:2115891-2115938	4	CC2G_000875	+
scaffold_1:2118981-2118992	3-4	CC2G_000876	-
scaffold_1:2118981-2118992	3-4	CC2G_000876	-
scaffold_1:2119033-2119056	2-4	CC2G_000876	-
scaffold_1:2119430-2119439	2-4	CC2G_000876	-
scaffold_1:2119430-2119439	2-4	CC2G_000876	-
scaffold_1:2119439-2119487	2-4	CC2G_000876	-
scaffold_1:2120000-2120056	2	CC2G_000876	-
scaffold_1:2128382-2128438	1	CC2G_000882	+
scaffold_1:2131038-2131048	8	CC2G_000882	+
scaffold_1:2131038-2131054	8	CC2G_000882	+
scaffold_1:2131147-2131196	9	CC2G_000882	+
scaffold_1:2132675-2132713	3	CC2G_000883	+
scaffold_1:2133394-2133458	4	CC2G_000883	+
scaffold_1:2134899-2134923	7	CC2G_000883	+
scaffold_1:2137112-2137172	1	CC2G_000884	-
scaffold_1:2142601-2142606	2	CC2G_000887	+
scaffold_1:2142721-2142773	3	CC2G_000887	+
scaffold_1:2142784-2142802	3	CC2G_000887	+
scaffold_1:2143416-2143477	6	CC2G_000887	+
scaffold_1:2143600-2143625	6	CC2G_000887	+
scaffold_1:2143656-2143684	7	CC2G_000887	+
scaffold_1:2151403-2151483	1	CC2G_000891	-
scaffold_1:2153314-2153332	5	CC2G_000892	+
scaffold_1:2155318-2155325	1	CC2G_000893	-
scaffold_1:2155799-2155867	2	CC2G_000894	-
scaffold_1:2155863-2155903	2	CC2G_000894	-
scaffold_1:2159551-2159573	6	CC2G_000896	-
scaffold_1:2160608-2160659	1	CC2G_000897	+
scaffold_1:2160871-2161002	3	CC2G_000897	+
scaffold_1:2162454-2162505	8	CC2G_000897	+
scaffold_1:2180249-2180308	2	CC2G_000903	+
scaffold_1:2183152-2183163	1	CC2G_000904	-
scaffold_1:2183154-2183163	1	CC2G_000904	-
scaffold_1:2183154-2183174	1	CC2G_000904	-
scaffold_1:2183197-2183211	1	CC2G_000904	-
scaffold_1:218646-218651	10	CC2G_000092	+
scaffold_1:219218-219288	13	CC2G_000092	+
scaffold_1:2210905-2210962	3	CC2G_000917	-
scaffold_1:2211054-2211110	3	CC2G_000917	-
scaffold_1:2215187-2215247	2	CC2G_000919	+
scaffold_1:2218576-2218631	14	CC2G_000921	-
scaffold_1:2227504-2227561	12	CC2G_000926	-
scaffold_1:2227562-2227579	11	CC2G_000926	-
scaffold_1:2227618-2227645	11	CC2G_000926	-
scaffold_1:2228278-2228286	8	CC2G_000926	-
scaffold_1:2232033-2232041	2	CC2G_000928	+
scaffold_1:2251818-2251873	3	CC2G_000935	+
scaffold_1:2252193-2252227	5	CC2G_000936	-
scaffold_1:2252227-2252282	3	CC2G_000935	+
scaffold_1:2252719-2252781	4	CC2G_000936	-
scaffold_1:2252870-2252884	3	CC2G_000935	+
scaffold_1:2252870-2252884	3	CC2G_000935	+
scaffold_1:2252922-2252940	4	CC2G_000936	-
scaffold_1:2259807-2259856	1	CC2G_000939	+
scaffold_1:2260025-2260083	1	CC2G_000939	+
scaffold_1:2267876-2267931	1	CC2G_000942	-
scaffold_1:2268579-2268640	3	CC2G_000943	+
scaffold_1:2270519-2270557	1	CC2G_000945	+
scaffold_1:2273609-2273664	2	CC2G_000946	+
scaffold_1:2279242-2279301	2	CC2G_000947	-
scaffold_1:2286401-2286451	5	CC2G_000951	+
scaffold_1:2286495-2286547	4	CC2G_000952	-
scaffold_1:2295461-2295472	1	CC2G_000956	+
scaffold_1:2295461-2295472	1	CC2G_000956	+
scaffold_1:2297274-2297285	2	CC2G_000958	+
scaffold_1:2297274-2297285	2	CC2G_000958	+
scaffold_1:2298314-2298389	5	CC2G_000958	+
scaffold_1:2299862-2299873	7	CC2G_000959	-
scaffold_1:2299862-2299873	7	CC2G_000959	-
scaffold_1:2299907-2299930	6	CC2G_000959	-
scaffold_1:2299911-2299923	7	CC2G_000959	-
scaffold_1:2299911-2299930	7	CC2G_000959	-
scaffold_1:2299939-2299991	6	CC2G_000959	-
scaffold_1:2299939-2299991	6	CC2G_000959	-
scaffold_1:2300903-2300908	1	CC2G_000959	-
scaffold_1:2306208-2306214	11	CC2G_000962	-
scaffold_1:2317550-2317612	2	CC2G_000965	+
scaffold_1:2322781-2322840	3	CC2G_000967	+
scaffold_1:2327117-2327176	3	CC2G_000968	-
scaffold_1:2331618-2331623	2	CC2G_000970	+
scaffold_1:2331867-2331892	3	CC2G_000970	+
scaffold_1:2335265-2335299	9	CC2G_000970	+
scaffold_1:2335265-2335307	9	CC2G_000970	+
scaffold_1:2335330-2335361	9	CC2G_000970	+
scaffold_1:2335717-2335778	10	CC2G_000970	+
scaffold_1:2337193-2337244	1	CC2G_000972	+
scaffold_1:2340235-2340250	3	CC2G_000974	+
scaffold_1:2340291-2340306	3	CC2G_000974	+
scaffold_1:2341730-2341812	1	CC2G_000975	+
scaffold_1:2341730-2341928	1	CC2G_000975	+
scaffold_1:2341812-2341821	2	CC2G_000975	+
scaffold_1:2341812-2341928	2	CC2G_000975	+
scaffold_1:2352015-2352084	15	CC2G_000979	-
scaffold_1:2359201-2359212	3	CC2G_000981	+
scaffold_1:2375136-2375142	3	CC2G_000989	-
scaffold_1:2375136-2375142	3	CC2G_000989	-
scaffold_1:2375186-2375198	3	CC2G_000989	-
scaffold_1:2377018-2377070	4	CC2G_000991	-
scaffold_1:2377249-2377254	3	CC2G_000991	-
scaffold_1:2377249-2377254	3	CC2G_000991	-
scaffold_1:2377298-2377314	3	CC2G_000991	-
scaffold_1:2377298-2377314	3	CC2G_000991	-
scaffold_1:2384993-2385013	13	CC2G_000994	+
scaffold_1:2388275-2388333	4	CC2G_000997	-
scaffold_1:2390161-2390224	1	CC2G_000997	-
scaffold_1:2390318-2390371	1	CC2G_000997	-
scaffold_1:2391837-2391893	3	CC2G_000998	-
scaffold_1:2398668-2398696	8	CC2G_001000	+
scaffold_1:2399365-2399423	8	CC2G_001000	+
scaffold_1:2400205-2400260	8	CC2G_001001	-
scaffold_1:2403367-2403380	6	CC2G_001002	+
scaffold_1:2403621-2403710	7	CC2G_001002	+
scaffold_1:2420740-2420849	1	CC2G_001008	+
scaffold_1:2421204-2421217	1	CC2G_001008	+
scaffold_1:2421217-2421233	1	CC2G_001008	+
scaffold_1:242290-242361	1	CC2G_000098	-
scaffold_1:2428683-2428701	6	CC2G_001014	-
scaffold_1:2428683-2428743	6	CC2G_001014	-
scaffold_1:2428743-2428766	6	CC2G_001014	-
scaffold_1:2429781-2429846	1	CC2G_001014	-
scaffold_1:2430401-2430449	1	CC2G_001015	+
scaffold_1:2432687-2432761	1	CC2G_001016	-
scaffold_1:2432795-2432840	1	CC2G_001016	-
scaffold_1:2432816-2432854	1	CC2G_001016	-
scaffold_1:2432850-2432854	1	CC2G_001016	-
scaffold_1:2432850-2432854	1	CC2G_001016	-
scaffold_1:2432854-2432903	1	CC2G_001016	-
scaffold_1:2432855-2432908	1	CC2G_001016	-
scaffold_1:2432855-2432908	1	CC2G_001016	-
scaffold_1:2432903-2432908	1	CC2G_001016	-
scaffold_1:2432904-2432908	1	CC2G_001016	-
scaffold_1:2443514-2443579	7	CC2G_001021	-
scaffold_1:2444697-2444713	3	CC2G_001021	-
scaffold_1:2447565-2447577	1	CC2G_001023	+
scaffold_1:2447621-2447631	2	CC2G_001022	-
scaffold_1:2447621-2447631	2	CC2G_001022	-
scaffold_1:2447873-2447926	2	CC2G_001022	-
scaffold_1:2447951-2448007	3	CC2G_001023	+
scaffold_1:2448025-2448059	1	CC2G_001022	-
scaffold_1:2453270-2453288	2	CC2G_001026	-
scaffold_1:2453270-2453288	2	CC2G_001026	-
scaffold_1:2455993-2456015	3	CC2G_001028	+
scaffold_1:2466616-2466628	2	CC2G_001033	-
scaffold_1:2466628-2466684	1	CC2G_001033	-
scaffold_1:2467517-2467534	4	CC2G_001034	-
scaffold_1:2467572-2467601	4	CC2G_001034	-
scaffold_1:2467885-2467955	3	CC2G_001034	-
scaffold_1:2473707-2473715	5	CC2G_001037	-
scaffold_1:2479344-2479406	1	CC2G_001040	+
scaffold_1:2480542-2480628	2	CC2G_001040	+
scaffold_1:2490334-2490362	3	CC2G_001045	+
scaffold_1:2492449-2492454	8	CC2G_001046	-
scaffold_1:2494681-2494708	2	CC2G_001047	+
scaffold_1:2494713-2494724	2	CC2G_001047	+
scaffold_1:2494785-2494812	3	CC2G_001047	+
scaffold_1:2495336-2495343	5	CC2G_001047	+
scaffold_1:2497113-2497118	7	CC2G_001048	+
scaffold_1:2497118-2497125	7-8	CC2G_001048	+
scaffold_1:2497386-2497447	9	CC2G_001048	+
scaffold_1:2498154-2498214	2	CC2G_001049	+
scaffold_1:2506376-2506422	4	CC2G_001052	-
scaffold_1:2506376-2506422	4	CC2G_001052	-
scaffold_1:2515662-2515722	1-2	CC2G_001056	-
scaffold_1:2515662-2515722	1-2	CC2G_001056	-
scaffold_1:2515723-2515735	1	CC2G_001056	-
scaffold_1:2515723-2515791	1	CC2G_001056	-
scaffold_1:2515723-2515791	1	CC2G_001056	-
scaffold_1:2521596-2521631	5	CC2G_001061	-
scaffold_1:2523061-2523075	2	CC2G_001061	-
scaffold_1:2523326-2523383	2	CC2G_001061	-
scaffold_1:2523474-2523528	1	CC2G_001061	-
scaffold_1:2527924-2527929	5	CC2G_001066	+
scaffold_1:2529643-2529708	11	CC2G_001066	+
scaffold_1:2529963-2530051	12	CC2G_001066	+
scaffold_1:2531493-2531539	1	CC2G_001067	-
scaffold_1:2531584-2531591	1	CC2G_001067	-
scaffold_1:2531584-2531591	1	CC2G_001067	-
scaffold_1:2534368-2534385	5	CC2G_001069	+
scaffold_1:2534368-2534385	5	CC2G_001069	+
scaffold_1:2542523-2542544	4	CC2G_001072	+
scaffold_1:2542587-2542595	5	CC2G_001072	+
scaffold_1:2547034-2547093	2	CC2G_001074	-
scaffold_1:2551722-2551752	3	CC2G_001078	-
scaffold_1:2551730-2551752	3	CC2G_001078	-
scaffold_1:2551797-2551802	2	CC2G_001078	-
scaffold_1:2552401-2552407	3	CC2G_001079	+
scaffold_1:2552401-2552407	3	CC2G_001079	+
scaffold_1:2562377-2562390	1	CC2G_001085	-
scaffold_1:2562435-2562441	1	CC2G_001085	-
scaffold_1:2562435-2562446	1	CC2G_001085	-
scaffold_1:2563947-2564002	1	CC2G_001086	-
scaffold_1:2566069-2566256	2	CC2G_001087	+
scaffold_1:2566154-2566195	2	CC2G_001087	+
scaffold_1:2566154-2566256	2	CC2G_001087	+
scaffold_1:2566872-2566936	3	CC2G_001087	+
scaffold_1:2575478-2575533	2	CC2G_001093	+
scaffold_1:2576089-2576104	8	CC2G_001093	+
scaffold_1:2576104-2576113	8	CC2G_001093	+
scaffold_1:2576147-2576169	8	CC2G_001093	+
scaffold_1:2576177-2576229	9	CC2G_001093	+
scaffold_1:2576358-2576369	10	CC2G_001093	+
scaffold_1:2579456-2579509	5	CC2G_001095	-
scaffold_1:2582798-2582807	5	CC2G_001096	+
scaffold_1:2583560-2583568	4	CC2G_001097	+
scaffold_1:2583560-2583568	4	CC2G_001097	+
scaffold_1:2583679-2583768	5	CC2G_001097	+
scaffold_1:2583679-2583768	5	CC2G_001097	+
scaffold_1:2583914-2583919	6	CC2G_001097	+
scaffold_1:2584035-2584142	7	CC2G_001097	+
scaffold_1:2584035-2584142	7	CC2G_001097	+
scaffold_1:2596704-2596728	4	CC2G_001105	+
scaffold_1:2596704-2596728	4	CC2G_001105	+
scaffold_1:2596802-2596846	4	CC2G_001105	+
scaffold_1:2596860-2596923	5	CC2G_001105	+
scaffold_1:2597417-2597469	7	CC2G_001105	+
scaffold_1:2598114-2598168	1	CC2G_001106	+
scaffold_1:2600336-2600344	11	CC2G_001107	-
scaffold_1:2602413-2602465	3	CC2G_001108	-
scaffold_1:2603345-2603352	2	CC2G_001109	-
scaffold_1:2619582-2619649	7	CC2G_001119	-
scaffold_1:2620519-2620571	4	CC2G_001119	-
scaffold_1:2620519-2620571	4	CC2G_001119	-
scaffold_1:2620794-2620804	1-2	CC2G_001119	-
scaffold_1:2622038-2622095	3	CC2G_001120	+
scaffold_1:2628395-2628408	2	CC2G_001122	+
scaffold_1:2629780-2629839	6-8	CC2G_001122	+
scaffold_1:2630558-2630624	10	CC2G_001122	+
scaffold_1:2635809-2635816	2	CC2G_001125	-
scaffold_1:2635809-2635816	2	CC2G_001125	-
scaffold_1:2635816-2635861	2	CC2G_001125	-
scaffold_1:2635863-2635946	2	CC2G_001125	-
scaffold_1:2638740-2638745	4	CC2G_001128	-
scaffold_1:2638740-2638745	4	CC2G_001128	-
scaffold_1:2639678-2639687	3	CC2G_001128	-
scaffold_1:2643183-2643232	1	CC2G_001128	-
scaffold_1:2643844-2643854	2	CC2G_001129	-
scaffold_1:2644785-2644793	2	CC2G_001130	+
scaffold_1:265071-265106	7	CC2G_000107	+
scaffold_1:265124-265165	8	CC2G_000107	+
scaffold_1:2653489-2653556	8	CC2G_001134	-
scaffold_1:265632-265643	9	CC2G_000107	+
scaffold_1:265695-265710	9	CC2G_000107	+
scaffold_1:2659968-2660017	8	CC2G_001136	+
scaffold_1:2660017-2660040	8	CC2G_001136	+
scaffold_1:2660017-2660040	8	CC2G_001136	+
scaffold_1:2660683-2660696	9	CC2G_001136	+
scaffold_1:2661316-2661324	2	CC2G_001137	+
scaffold_1:2661325-2661354	2	CC2G_001137	+
scaffold_1:2664302-2664312	6	CC2G_001139	+
scaffold_1:2665471-2665478	9	CC2G_001139	+
scaffold_1:2674092-2674146	2	CC2G_001143	+
scaffold_1:2674218-2674267	2	CC2G_001143	+
scaffold_1:2674344-2674406	2	CC2G_001143	+
scaffold_1:268440-268496	2	CC2G_000108	+
scaffold_1:2694212-2694258	2	CC2G_001147	+
scaffold_1:2694212-2694262	2	CC2G_001147	+
scaffold_1:2694604-2694667	2	CC2G_001147	+
scaffold_1:2694761-2694815	2	CC2G_001147	+
scaffold_1:2699782-2699787	4	CC2G_001149	+
scaffold_1:2715935-2715947	7	CC2G_001154	+
scaffold_1:2716601-2716656	1	CC2G_001155	+
scaffold_1:2721459-2721465	5	CC2G_001157	-
scaffold_1:2721459-2721465	5	CC2G_001157	-
scaffold_1:2722428-2722495	1	CC2G_001157	-
scaffold_1:2732416-2732429	2	CC2G_001162	-
scaffold_1:2732416-2732429	2	CC2G_001162	-
scaffold_1:2737924-2737985	3	CC2G_001166	+
scaffold_1:2758213-2758288	1	CC2G_001175	+
scaffold_1:2758517-2758568	2	CC2G_001175	+
scaffold_1:2759427-2759479	6-8	CC2G_001175	+
scaffold_1:2761216-2761268	3	CC2G_001176	+
scaffold_1:2765642-2765695	15	CC2G_001178	+
scaffold_1:2768758-2768767	5	CC2G_001180	-
scaffold_1:2768767-2768773	5	CC2G_001180	-
scaffold_1:2768816-2768849	5	CC2G_001180	-
scaffold_1:2771146-2771151	8	CC2G_001181	-
scaffold_1:2771728-2771741	6	CC2G_001181	-
scaffold_1:2773123-2773148	2	CC2G_001182	+
scaffold_1:2776739-2776751	2	CC2G_001184	+
scaffold_1:2776751-2776767	2	CC2G_001184	+
scaffold_1:2776751-2776880	2	CC2G_001184	+
scaffold_1:2778755-2778814	1	CC2G_001185	+
scaffold_1:2778755-2778840	1	CC2G_001185	+
scaffold_1:2784450-2784508	2	CC2G_001188	-
scaffold_1:2784773-2784782	1	CC2G_001188	-
scaffold_1:2793146-2793206	3	CC2G_001194	-
scaffold_1:2793999-2794079	2	CC2G_001194	-
scaffold_1:2794079-2794094	2	CC2G_001194	-
scaffold_1:2794079-2794094	2	CC2G_001194	-
scaffold_1:2806801-2806815	6	CC2G_001200	-
scaffold_1:2811942-2811996	4	CC2G_001203	+
scaffold_1:2821743-2821879	7	CC2G_001206	+
scaffold_1:2826087-2826113	1	CC2G_001208	+
scaffold_1:2826097-2826147	2	CC2G_001208	+
scaffold_1:2826113-2826147	2	CC2G_001208	+
scaffold_1:2826113-2826147	2	CC2G_001208	+
scaffold_1:2826147-2826188	2	CC2G_001208	+
scaffold_1:2826163-2826188	3	CC2G_001208	+
scaffold_1:2826163-2826188	3	CC2G_001208	+
scaffold_1:2826254-2826284	3	CC2G_001208	+
scaffold_1:2826254-2826284	3	CC2G_001208	+
scaffold_1:2831473-2831514	2	CC2G_001210	-
scaffold_1:2831549-2831574	1	CC2G_001210	-
scaffold_1:2834244-2834407	6	CC2G_001212	-
scaffold_1:2841318-2841368	8	CC2G_001214	-
scaffold_1:2842711-2842760	2	CC2G_001214	-
scaffold_1:2852964-2853015	6	CC2G_001218	+
scaffold_1:2853103-2853156	6	CC2G_001218	+
scaffold_1:2855034-2855088	10	CC2G_001219	+
scaffold_1:2855501-2855552	5	CC2G_001220	-
scaffold_1:2862218-2862270	1	CC2G_001224	+
scaffold_1:2869186-2869264	2	CC2G_001229	-
scaffold_1:2882998-2883053	7	CC2G_001235	-
scaffold_1:2916554-2916609	1	CC2G_001249	+
scaffold_1:2924208-2924259	1	CC2G_001251	-
scaffold_1:2924318-2924372	1	CC2G_001251	-
scaffold_1:2927884-2927981	5	CC2G_001253	-
scaffold_1:2928537-2928554	2-3	CC2G_001253	-
scaffold_1:2942788-2942845	3	CC2G_001262	-
scaffold_1:2943261-2943316	2	CC2G_001262	-
scaffold_1:2943541-2943604	1	CC2G_001262	-
scaffold_1:2963842-2963881	6	CC2G_001272	-
scaffold_1:2963899-2963935	5	CC2G_001272	-
scaffold_1:2966664-2966674	2	CC2G_001273	+
scaffold_1:2969244-2969290	11	CC2G_001274	-
scaffold_1:2969301-2969346	10	CC2G_001274	-
scaffold_1:2969982-2970034	8	CC2G_001274	-
scaffold_1:2970041-2970088	7	CC2G_001274	-
scaffold_1:2970100-2970119	7	CC2G_001274	-
scaffold_1:2970172-2970188	6	CC2G_001274	-
scaffold_1:2972941-2973004	10	CC2G_001275	-
scaffold_1:2973632-2973641	6	CC2G_001275	-
scaffold_1:2973632-2973641	6	CC2G_001275	-
scaffold_1:2988634-2988653	9	CC2G_001280	-
scaffold_1:2990092-2990179	3	CC2G_001280	-
scaffold_1:2990666-2990698	11	CC2G_001281	-
scaffold_1:2990759-2990780	10	CC2G_001281	-
scaffold_1:2993064-2993139	3	CC2G_001282	-
scaffold_1:2993129-2993139	3	CC2G_001282	-
scaffold_1:2993180-2993211	3	CC2G_001282	-
scaffold_1:2993211-2993325	3	CC2G_001282	-
scaffold_1:299724-299773	3	CC2G_000122	+
scaffold_1:2997516-2997543	2	CC2G_001284	-
scaffold_1:3005705-3005747	2	CC2G_001286	-
scaffold_1:3005763-3005825	1	CC2G_001286	-
scaffold_1:3023753-3023773	1	CC2G_001293	+
scaffold_1:3024228-3024244	3	CC2G_001293	+
scaffold_1:3024231-3024244	3	CC2G_001293	+
scaffold_1:3024288-3024306	3	CC2G_001293	+
scaffold_1:3043650-3043655	1	CC2G_001302	-
scaffold_1:3043650-3043655	1	CC2G_001302	-
scaffold_1:3047163-3047221	7	CC2G_001304	-
scaffold_1:305045-305114	2	CC2G_000123	-
scaffold_1:305114-305147	1	CC2G_000123	-
scaffold_1:3061093-3061112	1	CC2G_001307	+
scaffold_1:3061146-3061171	4	CC2G_001307	+
scaffold_1:3061208-3061262	1	CC2G_001307	+
scaffold_1:3061311-3061321	2	CC2G_001307	+
scaffold_1:3061361-3061373	1-2	CC2G_001307	+
scaffold_1:3061420-3061468	2	CC2G_001307	+
scaffold_1:306216-306263	2	CC2G_000123	-
scaffold_1:306263-306272	1	CC2G_000123	-
scaffold_1:3064299-3064355	2	CC2G_001308	+
scaffold_1:3064792-3064860	3	CC2G_001308	+
scaffold_1:3083399-3083427	5	CC2G_001314	+
scaffold_1:3085776-3085792	15	CC2G_001314	+
scaffold_1:3085846-3085886	16	CC2G_001314	+
scaffold_1:3148720-3148833	22-23	CC2G_001330	-
scaffold_1:3148981-3149042	22-23	CC2G_001330	-
scaffold_1:3149126-3149179	20	CC2G_001330	-
scaffold_1:3149308-3149361	19	CC2G_001330	-
scaffold_1:3149361-3149380	17-19	CC2G_001330	-
scaffold_1:3154027-3154137	14	CC2G_001332	-
scaffold_1:3154532-3154549	12	CC2G_001332	-
scaffold_1:3160808-3160868	1-2	CC2G_001334	-
scaffold_1:3160816-3160868	1-2	CC2G_001334	-
scaffold_1:3160873-3160905	1	CC2G_001334	-
scaffold_1:3160873-3160953	1	CC2G_001334	-
scaffold_1:3160873-3160953	1	CC2G_001334	-
scaffold_1:3167974-3168035	1	CC2G_001338	-
scaffold_1:3173249-3173306	3	CC2G_001340	-
scaffold_1:3181618-3181647	9	CC2G_001344	+
scaffold_1:3181618-3181649	8	CC2G_001344	+
scaffold_1:3181734-3181780	10	CC2G_001344	+
scaffold_1:3181780-3181837	10	CC2G_001344	+
scaffold_1:3183662-3183673	3	CC2G_001345	+
scaffold_1:318442-318475	3	CC2G_000131	-
scaffold_1:318464-318568	3	CC2G_000131	-
scaffold_1:3186655-3186722	9	CC2G_001346	+
scaffold_1:3186742-3186804	9	CC2G_001346	+
scaffold_1:319028-319038	2	CC2G_000131	-
scaffold_1:319269-319280	1	CC2G_000131	-
scaffold_1:319280-319301	1	CC2G_000131	-
scaffold_1:319282-319301	1	CC2G_000131	-
scaffold_1:3195195-3195267	2	CC2G_001350	+
scaffold_1:3203157-3203191	2	CC2G_001353	-
scaffold_1:3227048-3227058	5	CC2G_001360	+
scaffold_1:3227048-3227058	5	CC2G_001360	+
scaffold_1:3227097-3227114	5	CC2G_001360	+
scaffold_1:3227097-3227114	5	CC2G_001360	+
scaffold_1:3235664-3235746	1	CC2G_001363	+
scaffold_1:3259753-3259811	2	CC2G_001370	+
scaffold_1:3266408-3266503	6	CC2G_001371	-
scaffold_1:3266921-3266934	3	CC2G_001371	-
scaffold_1:3266921-3266934	3	CC2G_001371	-
scaffold_1:3268283-3268331	3	CC2G_001372	+
scaffold_1:3284398-3284458	8	CC2G_001378	+
scaffold_1:3292403-3292413	4	CC2G_001382	+
scaffold_1:3292461-3292634	4	CC2G_001382	+
scaffold_1:3292664-3292739	5	CC2G_001382	+
scaffold_1:3297236-3297343	6	CC2G_001384	+
scaffold_1:3297343-3297444	6	CC2G_001384	+
scaffold_1:3299206-3299218	8	CC2G_001385	-
scaffold_1:3306070-3306129	7	CC2G_001386	+
scaffold_1:3306997-3307121	9	CC2G_001386	+
scaffold_1:330970-331172	6	CC2G_000138	+
scaffold_1:3337636-3337746	3	CC2G_001398	-
scaffold_1:3340639-3340675	1	CC2G_001401	+
scaffold_1:3340639-3340675	1	CC2G_001401	+
scaffold_1:3341287-3341303	4	CC2G_001401	+
scaffold_1:3344308-3344327	3	CC2G_001402	+
scaffold_1:3347978-3348055	1	CC2G_001403	-
scaffold_1:3357724-3357777	3	CC2G_001407	-
scaffold_1:3358837-3358891	4	CC2G_001409	-
scaffold_1:3359239-3359261	4	CC2G_001409	-
scaffold_1:3360153-3360216	1	CC2G_001409	-
scaffold_1:3362729-3362789	1	CC2G_001411	-
scaffold_1:3376804-3376825	4	CC2G_001420	+
scaffold_1:3376804-3376843	4	CC2G_001420	+
scaffold_1:3377143-3377217	5	CC2G_001420	+
scaffold_1:3384151-3384237	3	CC2G_001422	-
scaffold_1:3384507-3384580	3	CC2G_001422	-
scaffold_1:3384773-3384847	3	CC2G_001422	-
scaffold_1:3391074-3391098	2	CC2G_001425	-
scaffold_1:3391165-3391179	2	CC2G_001425	-
scaffold_1:3391228-3391245	2	CC2G_001425	-
scaffold_1:3391282-3391304	2	CC2G_001425	-
scaffold_1:3395264-3395317	5	CC2G_001427	-
scaffold_1:3395443-3395504	2	CC2G_001427	-
scaffold_1:3410105-3410513	3	CC2G_001437	-
scaffold_1:3411470-3411482	2	CC2G_001438	+
scaffold_1:3411470-3411482	2	CC2G_001438	+
scaffold_1:3414362-3414367	2	CC2G_001440	+
scaffold_1:3414362-3414376	2	CC2G_001440	+
scaffold_1:3420197-3420202	21	CC2G_001441	+
scaffold_1:3430468-3430490	8	CC2G_001445	-
scaffold_1:3432429-3432493	3	CC2G_001446	-
scaffold_1:3433992-3434008	1	CC2G_001447	+
scaffold_1:3434981-3435041	4	CC2G_001447	+
scaffold_1:3436942-3436952	14	CC2G_001448	-
scaffold_1:3436942-3437047	14	CC2G_001448	-
scaffold_1:3437009-3437047	14	CC2G_001448	-
scaffold_1:3437491-3437547	12	CC2G_001448	-
scaffold_1:3444486-3444576	6	CC2G_001451	+
scaffold_1:3444486-3444629	6	CC2G_001451	+
scaffold_1:3448647-3448789	16	CC2G_001452	+
scaffold_1:3452098-3452136	1	CC2G_001453	+
scaffold_1:3452098-3452147	1	CC2G_001453	+
scaffold_1:3452136-3452147	1	CC2G_001453	+
scaffold_1:3475762-3475898	2	CC2G_001458	-
scaffold_1:3476095-3476179	2	CC2G_001458	-
scaffold_1:3488545-3488729	1-2	CC2G_001464	-
scaffold_1:3501362-3501570	2	CC2G_001469	-
scaffold_1:3501746-3501813	1	CC2G_001470	+
scaffold_1:3510395-3510402	1	CC2G_001475	+
scaffold_1:351145-351151	1	CC2G_000145	-
scaffold_1:3516143-3516209	6	CC2G_001477	-
scaffold_1:3522440-3522510	2	CC2G_001478	+
scaffold_1:3527808-3527882	1	CC2G_001480	-
scaffold_1:3530050-3530106	2	CC2G_001481	+
scaffold_1:3530723-3530787	2	CC2G_001481	+
scaffold_1:3533613-3533623	2	CC2G_001483	+
scaffold_1:3533776-3533784	3	CC2G_001483	+
scaffold_1:3558721-3558781	4	CC2G_001493	+
scaffold_1:3566021-3566101	1	CC2G_001496	-
scaffold_1:3566021-3566128	1	CC2G_001496	-
scaffold_1:357606-357683	5	CC2G_000147	+
scaffold_1:3580401-3580481	11	CC2G_001500	+
scaffold_1:3596345-3596353	2	CC2G_001505	-
scaffold_1:3596345-3596416	2	CC2G_001505	-
scaffold_1:3597047-3597061	1-2	CC2G_001505	-
scaffold_1:3597047-3597061	1-2	CC2G_001505	-
scaffold_1:3597733-3597801	1	CC2G_001506	+
scaffold_1:3597733-3597801	1	CC2G_001506	+
scaffold_1:3598126-3598170	2	CC2G_001506	+
scaffold_1:3598126-3598170	2	CC2G_001506	+
scaffold_1:3615724-3615730	3	CC2G_001512	-
scaffold_1:3615795-3615942	3	CC2G_001512	-
scaffold_1:3623046-3623144	2	CC2G_001514	-
scaffold_1:365616-365667	1	CC2G_000150	+
scaffold_1:3659516-3659575	4	CC2G_001533	-
scaffold_1:3660143-3660305	1	CC2G_001533	-
scaffold_1:3668536-3668553	21-22	CC2G_001538	-
scaffold_1:3668596-3668639	20-22	CC2G_001538	-
scaffold_1:3668646-3668692	20-21	CC2G_001538	-
scaffold_1:3687142-3687275	3	CC2G_001543	+
scaffold_1:369832-369906	1	CC2G_000152	+
scaffold_1:3700191-3700254	2	CC2G_001547	-
scaffold_1:3700377-3700475	2	CC2G_001547	-
scaffold_1:3700538-3700618	2	CC2G_001547	-
scaffold_1:3723933-3724025	5	CC2G_001562	-
scaffold_1:3723933-3724100	5	CC2G_001562	-
scaffold_1:3724553-3724585	2	CC2G_001562	-
scaffold_1:3725736-3725844	2	CC2G_001563	+
scaffold_1:3726062-3726072	3	CC2G_001563	+
scaffold_1:3726120-3726145	3	CC2G_001563	+
scaffold_1:3737214-3737280	3	CC2G_001570	-
scaffold_1:3737808-3737858	1	CC2G_001570	-
scaffold_1:374387-374399	1	CC2G_000155	-
scaffold_1:3752417-3752426	6	CC2G_001578	-
scaffold_1:3755722-3755727	2	CC2G_001579	+
scaffold_1:3756268-3756319	4	CC2G_001579	+
scaffold_1:3756556-3756566	5	CC2G_001579	+
scaffold_1:3756660-3756753	5	CC2G_001579	+
scaffold_1:3784587-3784599	5	CC2G_001591	-
scaffold_1:3789277-3789338	1	CC2G_001594	+
scaffold_1:3798833-3798892	16	CC2G_001598	-
scaffold_1:380407-380412	2	CC2G_000157	-
scaffold_1:3819841-3819894	2	CC2G_001603	-
scaffold_1:3834671-3834742	3-5	CC2G_001609	+
scaffold_1:3836200-3836213	18	CC2G_001610	-
scaffold_1:3839918-3839971	3	CC2G_001611	-
scaffold_1:3861980-3862055	2-4	CC2G_001620	+
scaffold_1:389971-389985	7	CC2G_000160	+
scaffold_1:390025-390039	7-8	CC2G_000160	+
scaffold_1:3903678-3903688	4	CC2G_001630	-
scaffold_1:3903894-3903901	3	CC2G_001630	-
scaffold_1:3906256-3906306	2	CC2G_001631	-
scaffold_1:3912999-3913013	1	CC2G_001633	+
scaffold_1:3919978-3920038	15	CC2G_001636	+
scaffold_1:3930760-3930787	3	CC2G_001641	-
scaffold_1:3930760-3930787	3	CC2G_001641	-
scaffold_1:3931959-3931964	4	CC2G_001642	+
scaffold_1:3951999-3952150	1	CC2G_001651	-
scaffold_1:3951999-3952150	1	CC2G_001651	-
scaffold_1:3952210-3952216	1	CC2G_001651	-
scaffold_1:3952210-3952290	1	CC2G_001651	-
scaffold_1:3952210-3952290	1	CC2G_001651	-
scaffold_1:3954090-3954154	4	CC2G_001653	-
scaffold_1:3955333-3955338	1-2	CC2G_001653	-
scaffold_1:4004523-4004574	10	CC2G_001678	+
scaffold_1:4004840-4004888	11	CC2G_001678	+
scaffold_1:4007390-4008013	6	CC2G_001679	+
scaffold_1:4010514-4010570	1	CC2G_001680	-
scaffold_1:4037316-4037351	5	CC2G_001691	+
scaffold_1:4073469-4073487	2	CC2G_001708	+
scaffold_1:4081979-4082038	7	CC2G_001711	+
scaffold_1:4091343-4091525	2	CC2G_001714	+
scaffold_1:409680-409711	2	CC2G_000169	+
scaffold_1:409731-409777	2	CC2G_000169	+
scaffold_1:4127934-4128595	8	CC2G_001724	+
scaffold_1:414019-414075	5	CC2G_000172	-
scaffold_1:414075-414080	4	CC2G_000172	-
scaffold_1:4143597-4143602	2	CC2G_001732	+
scaffold_1:4144131-4144184	2	CC2G_001732	+
scaffold_1:4146283-4146308	4	CC2G_001732	+
scaffold_1:4146443-4146497	4	CC2G_001732	+
scaffold_1:4152078-4152150	6	CC2G_001734	+
scaffold_1:4163220-4163294	2	CC2G_001739	+
scaffold_1:4171068-4171119	3	CC2G_001744	-
scaffold_1:4188302-4188348	2	CC2G_001748	-
scaffold_1:4189360-4189391	1	CC2G_001749	-
scaffold_1:4189360-4189391	1	CC2G_001749	-
scaffold_1:4189645-4189670	1	CC2G_001750	+
scaffold_1:4189645-4189670	1	CC2G_001750	+
scaffold_1:4189650-4189670	1	CC2G_001750	+
scaffold_1:4189650-4189670	1	CC2G_001750	+
scaffold_1:4189706-4189786	1	CC2G_001750	+
scaffold_1:4189706-4189786	1	CC2G_001750	+
scaffold_1:4189706-4189847	1	CC2G_001750	+
scaffold_1:41964-42019	6	CC2G_000017	-
scaffold_1:4231228-4231237	2	CC2G_001766	+
scaffold_1:4231286-4231301	2	CC2G_001766	+
scaffold_1:4240629-4240687	1	CC2G_001770	+
scaffold_1:4241010-4241016	1	CC2G_001770	+
scaffold_1:4244281-4244359	9-10	CC2G_001772	-
scaffold_1:4244562-4244632	9	CC2G_001772	-
scaffold_1:4245334-4245344	5-6	CC2G_001772	-
scaffold_1:4245613-4245668	4-6	CC2G_001772	-
scaffold_1:4245835-4245898	3-5	CC2G_001772	-
scaffold_1:4246082-4246144	2-3	CC2G_001772	-
scaffold_1:431427-431479	8	CC2G_000176	-
scaffold_1:44137-44233	2-3	CC2G_000018	+
scaffold_1:44340-44462	2	CC2G_000018	+
scaffold_1:45611-45695	8	CC2G_000018	+
scaffold_1:45611-45887	8	CC2G_000018	+
scaffold_1:456916-457231	1	CC2G_000187	+
scaffold_1:460559-460618	2	CC2G_000189	+
scaffold_1:46287-46339	8	CC2G_000018	+
scaffold_1:466235-466290	8	CC2G_000191	+
scaffold_1:470486-470495	6	CC2G_000194	-
scaffold_1:470546-470569	5	CC2G_000194	-
scaffold_1:479160-479230	1	CC2G_000198	+
scaffold_1:483340-483374	3	CC2G_000199	+
scaffold_1:483422-483466	4	CC2G_000199	+
scaffold_1:483422-483471	4	CC2G_000199	+
scaffold_1:483471-483529	4	CC2G_000199	+
scaffold_1:491426-491481	8	CC2G_000201	-
scaffold_1:494417-494531	3	CC2G_000202	-
scaffold_1:494417-494559	3	CC2G_000202	-
scaffold_1:494531-494532	4	CC2G_000202	-
scaffold_1:499093-499108	4	CC2G_000204	+
scaffold_1:511492-511520	9	CC2G_000208	-
scaffold_1:516955-516968	1-2	CC2G_000209	-
scaffold_1:517008-517019	2	CC2G_000209	-
scaffold_1:530066-530095	2	CC2G_000217	+
scaffold_1:53247-53266	1	CC2G_000020	+
scaffold_1:53307-53320	1	CC2G_000020	+
scaffold_1:53311-53320	1	CC2G_000020	+
scaffold_1:651377-651389	2	CC2G_000257	-
scaffold_1:651432-651502	2	CC2G_000257	-
scaffold_1:651432-651507	2	CC2G_000257	-
scaffold_1:660302-660371	10	CC2G_000258	-
scaffold_1:668210-668273	8	CC2G_000261	-
scaffold_1:677437-677446	8	CC2G_000266	+
scaffold_1:677487-677502	8	CC2G_000266	+
scaffold_1:677517-677525	9	CC2G_000266	+
scaffold_1:677565-677579	9	CC2G_000266	+
scaffold_1:680085-680134	2	CC2G_000268	-
scaffold_1:680142-680155	2-4	CC2G_000268	-
scaffold_1:680155-680203	2	CC2G_000268	-
scaffold_1:681102-681155	1	CC2G_000269	+
scaffold_1:701314-701626	1	CC2G_000277	+
scaffold_1:704136-704875	11	CC2G_000277	+
scaffold_1:706287-706340	7	CC2G_000278	-
scaffold_1:707496-707579	2	CC2G_000278	-
scaffold_1:716418-716475	3	CC2G_000282	+
scaffold_1:722389-722396	2	CC2G_000283	+
scaffold_1:749339-749361	3	CC2G_000292	+
scaffold_1:751236-751249	2	CC2G_000293	-
scaffold_1:751236-751249	2	CC2G_000293	-
scaffold_1:751297-751317	2	CC2G_000293	-
scaffold_1:751297-751317	2	CC2G_000293	-
scaffold_1:751297-751319	2	CC2G_000293	-
scaffold_1:755226-755286	2	CC2G_000294	+
scaffold_1:757197-757255	3	CC2G_000296	+
scaffold_1:773449-773469	2	CC2G_000301	+
scaffold_1:773449-773473	2	CC2G_000301	+
scaffold_1:773515-773528	3	CC2G_000301	+
scaffold_1:776162-776218	1	CC2G_000303	+
scaffold_1:802833-803013	1	CC2G_000310	+
scaffold_1:804407-804420	3	CC2G_000311	-
scaffold_1:804407-804420	3	CC2G_000311	-
scaffold_1:804464-804491	3	CC2G_000311	-
scaffold_1:804856-804924	3	CC2G_000311	-
scaffold_1:805236-805292	3	CC2G_000311	-
scaffold_1:805236-805292	3	CC2G_000311	-
scaffold_1:805310-805364	3	CC2G_000311	-
scaffold_1:805310-805364	3	CC2G_000311	-
scaffold_1:805659-805792	3	CC2G_000311	-
scaffold_1:805720-805800	2	CC2G_000311	-
scaffold_1:805848-805860	2	CC2G_000311	-
scaffold_1:805848-805889	1	CC2G_000311	-
scaffold_1:805957-805976	1	CC2G_000311	-
scaffold_1:805957-805976	1	CC2G_000311	-
scaffold_1:806185-806215	1	CC2G_000312	+
scaffold_1:806185-806215	1	CC2G_000312	+
scaffold_1:806510-806517	2	CC2G_000312	+
scaffold_1:806510-806517	2	CC2G_000312	+
scaffold_1:833957-833962	1	CC2G_000325	+
scaffold_1:838846-838884	1	CC2G_000328	+
scaffold_1:842063-842072	2	CC2G_000329	+
scaffold_1:842063-842072	2	CC2G_000329	+
scaffold_1:851692-851781	1	CC2G_000334	-
scaffold_1:857568-857624	1	CC2G_000337	+
scaffold_1:861488-861497	6	CC2G_000337	+
scaffold_1:876539-876599	3	CC2G_000344	+
scaffold_1:876786-876803	4	CC2G_000344	+
scaffold_1:899607-899678	1	CC2G_000355	+
scaffold_1:914117-914169	5	CC2G_000362	-
scaffold_1:926485-926559	2	CC2G_000368	-
scaffold_1:929361-929419	1	CC2G_000369	-
scaffold_1:959426-959439	1	CC2G_000382	+
scaffold_1:972824-972839	1-2	CC2G_000387	-
scaffold_1:976511-976588	14	CC2G_000388	-
scaffold_1:976511-976766	14	CC2G_000388	-
scaffold_1:976588-976617	14	CC2G_000388	-
scaffold_1:976617-976766	14	CC2G_000388	-
scaffold_1:978188-978255	10-11	CC2G_000388	-
scaffold_1:986515-986570	2	CC2G_000391	-
scaffold_1:986515-986573	2	CC2G_000391	-
scaffold_1:995340-995355	2	CC2G_000394	-
scaffold_1:999920-999973	15	CC2G_000398	-
scaffold_10:1049772-1049831	5	CC2G_002216	+
scaffold_10:1054140-1054388	30	CC2G_002216	+
scaffold_10:1058526-1058536	1	CC2G_002219	-
scaffold_10:1058548-1058567	1	CC2G_002219	-
scaffold_10:1063644-1063706	7	CC2G_002221	-
scaffold_10:1065219-1065229	1	CC2G_002222	-
scaffold_10:1073784-1073947	5	CC2G_002226	+
scaffold_10:1076508-1076567	1	CC2G_002227	-
scaffold_10:1078658-1078743	3	CC2G_002229	-
scaffold_10:1080889-1080900	1	CC2G_002232	-
scaffold_10:1086668-1086693	2	CC2G_002236	-
scaffold_10:1086778-1086842	2	CC2G_002236	-
scaffold_10:1089251-1089297	1	CC2G_002239	+
scaffold_10:1089306-1089347	1	CC2G_002239	+
scaffold_10:1112951-1112969	3	CC2G_002249	-
scaffold_10:1113011-1113049	3	CC2G_002249	-
scaffold_10:1114828-1114960	5	CC2G_002250	-
scaffold_10:1117432-1117485	12	CC2G_002251	-
scaffold_10:1117549-1117601	12	CC2G_002251	-
scaffold_10:1127802-1127815	2	CC2G_002253	-
scaffold_10:1137804-1137861	6	CC2G_002257	-
scaffold_10:1158255-1158321	18	CC2G_002263	+
scaffold_10:1161538-1161588	6	CC2G_002265	-
scaffold_10:1188001-1188020	1	CC2G_002275	-
scaffold_10:1196113-1196177	7	CC2G_002277	-
scaffold_10:1198187-1198248	3	CC2G_002277	-
scaffold_10:121304-121351	2	CC2G_001837	-
scaffold_10:123542-123554	2	CC2G_001838	-
scaffold_10:125386-125429	3	CC2G_001840	-
scaffold_10:125462-125488	3	CC2G_001840	-
scaffold_10:1259381-1259391	5	CC2G_002297	+
scaffold_10:1259435-1259446	5	CC2G_002297	+
scaffold_10:1260513-1260525	8	CC2G_002297	+
scaffold_10:1260513-1260525	8	CC2G_002297	+
scaffold_10:1277462-1277519	1	CC2G_002306	+
scaffold_10:1277591-1277602	2	CC2G_002306	+
scaffold_10:1278440-1278449	1	CC2G_002307	+
scaffold_10:1294328-1294396	2	CC2G_002313	+
scaffold_10:1305544-1305635	1	CC2G_002318	-
scaffold_10:1311665-1312203	7	CC2G_002322	+
scaffold_10:1316043-1316108	1	CC2G_002323	+
scaffold_10:1316227-1316399	1	CC2G_002323	+
scaffold_10:1316688-1316741	2	CC2G_002323	+
scaffold_10:1323443-1323499	2	CC2G_002328	-
scaffold_10:1332941-1332998	7	CC2G_002334	-
scaffold_10:1346968-1347039	3	CC2G_002340	+
scaffold_10:1355667-1355729	2	CC2G_002343	+
scaffold_10:1357877-1357931	2	CC2G_002344	-
scaffold_10:1358068-1358221	2	CC2G_002344	-
scaffold_10:137908-137930	6	CC2G_001848	+
scaffold_10:1448944-1448996	8	CC2G_002370	+
scaffold_10:1453538-1453557	5	CC2G_002371	-
scaffold_10:1453538-1453557	5	CC2G_002371	-
scaffold_10:1453593-1453619	4	CC2G_002371	-
scaffold_10:1453593-1453619	4	CC2G_002371	-
scaffold_10:1466495-1466845	1	CC2G_002376	+
scaffold_10:1477482-1477503	4-5	CC2G_002380	-
scaffold_10:1478183-1478245	1	CC2G_002380	-
scaffold_10:1478500-1478580	1-2	CC2G_002380	-
scaffold_10:148133-148211	3	CC2G_001856	-
scaffold_10:1486415-1486430	6	CC2G_002384	-
scaffold_10:1516311-1516384	7	CC2G_002392	+
scaffold_10:1531075-1531132	2	CC2G_002397	-
scaffold_10:1536833-1536887	14	CC2G_002398	+
scaffold_10:1539285-1539292	3	CC2G_002399	+
scaffold_10:1550650-1550662	16	CC2G_002403	+
scaffold_10:1554621-1554772	1	CC2G_002405	+
scaffold_10:1574834-1574969	4	CC2G_002411	+
scaffold_10:1576445-1576509	3	CC2G_002412	+
scaffold_10:1584244-1584300	6	CC2G_002416	+
scaffold_10:1592456-1592467	3	CC2G_002421	-
scaffold_10:1606770-1606791	1	CC2G_002426	+
scaffold_10:1607316-1607490	2	CC2G_002426	+
scaffold_10:1621116-1621125	2	CC2G_002433	+
scaffold_10:1628794-1628854	3	CC2G_002436	-
scaffold_10:1628843-1628854	3	CC2G_002436	-
scaffold_10:1628843-1628854	3	CC2G_002436	-
scaffold_10:1633395-1633481	1	CC2G_002437	+
scaffold_10:1634804-1634855	2-4	CC2G_002437	+
scaffold_10:1642064-1642146	1	CC2G_002441	+
scaffold_10:164766-164787	5	CC2G_001862	-
scaffold_10:167628-167712	1	CC2G_001863	+
scaffold_10:1702412-1702477	4	CC2G_002464	-
scaffold_10:1702531-1702607	4	CC2G_002464	-
scaffold_10:1740950-1741161	1	CC2G_002486	+
scaffold_10:1746266-1746395	5	CC2G_002486	+
scaffold_10:1769415-1769459	3-5	CC2G_002497	-
scaffold_10:1788211-1788269	2	CC2G_002506	-
scaffold_10:1833261-1833269	1	CC2G_002529	+
scaffold_10:1835767-1835822	3	CC2G_002530	+
scaffold_10:1842184-1842235	3	CC2G_002532	-
scaffold_10:1845631-1845703	7	CC2G_002534	-
scaffold_10:188769-188820	2	CC2G_001870	-
scaffold_10:1888490-1888527	3	CC2G_002549	+
scaffold_10:1888490-1888652	3	CC2G_002549	+
scaffold_10:1888880-1888918	4	CC2G_002549	+
scaffold_10:1888934-1888967	4	CC2G_002549	+
scaffold_10:1888934-1888988	4	CC2G_002549	+
scaffold_10:1889402-1889514	5	CC2G_002549	+
scaffold_10:1922267-1922280	1	CC2G_002562	-
scaffold_10:1926475-1926482	2	CC2G_002564	+
scaffold_10:1930310-1930359	13	CC2G_002567	-
scaffold_10:1932901-1932964	5	CC2G_002567	-
scaffold_10:1933789-1933819	2	CC2G_002568	+
scaffold_10:1933789-1933819	2	CC2G_002568	+
scaffold_10:1955633-1955676	7	CC2G_002578	-
scaffold_10:1955722-1955746	7	CC2G_002578	-
scaffold_10:1978255-1978292	2	CC2G_002587	+
scaffold_10:1980245-1980301	3	CC2G_002587	+
scaffold_10:1980431-1980795	3	CC2G_002587	+
scaffold_10:1980526-1980795	1	CC2G_002587	+
scaffold_10:1980731-1980795	1	CC2G_002587	+
scaffold_10:1980754-1980795	1	CC2G_002587	+
scaffold_10:1983091-1983094	1	CC2G_002589	+
scaffold_10:1983150-1983170	2	CC2G_002589	+
scaffold_10:1983443-1983458	2	CC2G_002589	+
scaffold_10:1983443-1983458	2	CC2G_002589	+
scaffold_10:1993763-1993817	5	CC2G_002594	+
scaffold_10:200070-200135	3	CC2G_001873	-
scaffold_10:200136-200143	3	CC2G_001873	-
scaffold_10:200274-200282	1	CC2G_001873	-
scaffold_10:201730-201786	3	CC2G_001874	+
scaffold_10:201785-201786	3	CC2G_001874	+
scaffold_10:2034741-2034798	4	CC2G_002609	-
scaffold_10:2048190-2048218	1	CC2G_002612	+
scaffold_10:2048244-2048320	2	CC2G_002612	+
scaffold_10:2048244-2048383	2	CC2G_002612	+
scaffold_10:2054100-2054166	1	CC2G_002616	+
scaffold_10:2060045-2060105	2	CC2G_002620	+
scaffold_10:2074974-2074994	13	CC2G_002629	-
scaffold_10:2075038-2075049	12	CC2G_002629	-
scaffold_10:2086797-2086857	3	CC2G_002634	+
scaffold_10:2089088-2089158	1	CC2G_002635	-
scaffold_10:2097015-2097070	3	CC2G_002639	-
scaffold_10:2099610-2099661	6	CC2G_002640	-
scaffold_10:2126131-2126277	8	CC2G_002648	-
scaffold_10:2132096-2132177	3	CC2G_002649	+
scaffold_10:2137336-2137390	15	CC2G_002649	+
scaffold_10:2137336-2137456	15	CC2G_002649	+
scaffold_10:2137582-2137647	15	CC2G_002649	+
scaffold_10:2165099-2167281	1	CC2G_002663	+
scaffold_10:2167201-2167281	1	CC2G_002663	+
scaffold_10:2176759-2176787	2	CC2G_002668	+
scaffold_10:2176809-2176842	3	CC2G_002668	+
scaffold_10:2184200-2184258	1	CC2G_002671	-
scaffold_10:2184212-2184258	1	CC2G_002671	-
scaffold_10:2184739-2184789	1	CC2G_002671	-
scaffold_10:2213804-2213809	1-2	CC2G_002686	+
scaffold_10:2213858-2213963	2	CC2G_002686	+
scaffold_10:2222281-2222459	2	CC2G_002689	-
scaffold_10:2238330-2238394	4	CC2G_002696	-
scaffold_10:2247348-2247354	3	CC2G_002697	-
scaffold_10:225392-225407	12	CC2G_001882	-
scaffold_10:2262027-2262059	5	CC2G_002700	-
scaffold_10:2262116-2262344	5	CC2G_002700	-
scaffold_10:228244-228261	8	CC2G_001883	-
scaffold_10:2290909-2290967	5	CC2G_002708	+
scaffold_10:2291594-2291636	8	CC2G_002708	+
scaffold_10:2295038-2295077	1	CC2G_002710	+
scaffold_10:2295077-2295138	1	CC2G_002710	+
scaffold_10:2295117-2295138	1	CC2G_002710	+
scaffold_10:2298368-2298405	10	CC2G_002710	+
scaffold_10:2304482-2304497	2	CC2G_002713	+
scaffold_10:2304538-2304547	2-3	CC2G_002713	+
scaffold_10:2304746-2304764	4-5	CC2G_002713	+
scaffold_10:253042-253052	2	CC2G_001892	+
scaffold_10:260026-260046	8	CC2G_001893	+
scaffold_10:260086-260100	9	CC2G_001893	+
scaffold_10:266719-266724	4	CC2G_001895	-
scaffold_10:269705-269726	1	CC2G_001897	+
scaffold_10:269764-269780	1	CC2G_001897	+
scaffold_10:27128-27281	2	CC2G_001799	-
scaffold_10:28522-28592	1	CC2G_001799	-
scaffold_10:292314-292320	3	CC2G_001905	-
scaffold_10:292879-292929	2	CC2G_001905	-
scaffold_10:292879-292934	2	CC2G_001905	-
scaffold_10:296833-296863	2	CC2G_001907	-
scaffold_10:296888-296935	2	CC2G_001907	-
scaffold_10:298253-298307	1	CC2G_001908	+
scaffold_10:298504-298577	1	CC2G_001908	+
scaffold_10:322655-322707	1	CC2G_001915	-
scaffold_10:348224-348283	12	CC2G_001925	+
scaffold_10:357081-357141	5	CC2G_001928	+
scaffold_10:395538-395558	2	CC2G_001944	-
scaffold_10:40754-40788	2	CC2G_001803	+
scaffold_10:409245-409251	4	CC2G_001951	-
scaffold_10:420948-420962	7	CC2G_001955	-
scaffold_10:420948-420983	7	CC2G_001955	-
scaffold_10:421016-421062	5	CC2G_001955	-
scaffold_10:423103-423157	8	CC2G_001956	-
scaffold_10:456495-456504	1	CC2G_001969	-
scaffold_10:467516-468051	6	CC2G_001974	+
scaffold_10:468119-468140	7	CC2G_001974	+
scaffold_10:480387-480394	3-5	CC2G_001980	-
scaffold_10:490913-490946	3	CC2G_001985	+
scaffold_10:490996-491004	3	CC2G_001985	+
scaffold_10:521657-521663	1	CC2G_001996	+
scaffold_10:526468-526518	9	CC2G_001999	-
scaffold_10:527085-527096	8	CC2G_001999	-
scaffold_10:527139-527155	8	CC2G_001999	-
scaffold_10:527139-527158	8	CC2G_001999	-
scaffold_10:527760-527777	7	CC2G_001999	-
scaffold_10:527822-527831	7	CC2G_001999	-
scaffold_10:530050-530112	1	CC2G_002000	+
scaffold_10:530748-530800	1	CC2G_002000	+
scaffold_10:537352-537408	4	CC2G_002001	+
scaffold_10:543961-544026	6	CC2G_002005	-
scaffold_10:568665-568778	2	CC2G_002014	-
scaffold_10:573930-573999	1	CC2G_002015	-
scaffold_10:575770-575833	2	CC2G_002016	+
scaffold_10:583141-583209	3	CC2G_002019	-
scaffold_10:586371-586390	6-8	CC2G_002020	+
scaffold_10:586374-586390	6-8	CC2G_002020	+
scaffold_10:586433-586444	7-8	CC2G_002020	+
scaffold_10:592423-592491	17	CC2G_002022	+
scaffold_10:597323-597334	5	CC2G_002025	-
scaffold_10:597381-597398	4	CC2G_002025	-
scaffold_10:605813-605868	5	CC2G_002028	-
scaffold_10:612336-612347	3	CC2G_002031	+
scaffold_10:615284-615306	2	CC2G_002032	+
scaffold_10:616594-616674	1	CC2G_002033	-
scaffold_10:616594-616783	1	CC2G_002033	-
scaffold_10:622174-622229	6	CC2G_002036	+
scaffold_10:622401-622406	7	CC2G_002036	+
scaffold_10:622401-622406	7	CC2G_002036	+
scaffold_10:622406-622457	7	CC2G_002036	+
scaffold_10:622946-622957	2	CC2G_002037	-
scaffold_10:643216-643419	1	CC2G_002048	-
scaffold_10:647817-647917	1	CC2G_002049	-
scaffold_10:650517-650571	1	CC2G_002052	+
scaffold_10:664436-664623	12	CC2G_002057	-
scaffold_10:667619-667719	2	CC2G_002057	-
scaffold_10:670303-670343	3	CC2G_002059	+
scaffold_10:677928-677946	2	CC2G_002061	+
scaffold_10:679353-679411	2	CC2G_002062	+
scaffold_10:696174-696240	3	CC2G_002069	+
scaffold_10:696780-696890	3	CC2G_002069	+
scaffold_10:698604-698674	2	CC2G_002070	+
scaffold_10:701522-701600	16	CC2G_002072	-
scaffold_10:701732-701891	16	CC2G_002072	-
scaffold_10:701791-701891	16	CC2G_002072	-
scaffold_10:722841-722849	2	CC2G_002077	-
scaffold_10:722901-722910	2	CC2G_002077	-
scaffold_10:722988-723044	2	CC2G_002077	-
scaffold_10:727735-727742	5	CC2G_002079	+
scaffold_10:727735-727742	5	CC2G_002079	+
scaffold_10:736655-736705	4	CC2G_002083	+
scaffold_10:742459-742489	2	CC2G_002085	-
scaffold_10:742514-742547	1	CC2G_002085	-
scaffold_10:750085-750115	10	CC2G_002088	+
scaffold_10:750169-750273	10	CC2G_002088	+
scaffold_10:763897-763904	2	CC2G_002094	-
scaffold_10:769701-769769	5	CC2G_002097	+
scaffold_10:769954-770007	6	CC2G_002097	+
scaffold_10:770007-770035	7	CC2G_002097	+
scaffold_10:77219-77294	3	CC2G_001813	-
scaffold_10:782213-782271	3	CC2G_002105	-
scaffold_10:787597-787695	3	CC2G_002106	+
scaffold_10:791834-791849	1-3	CC2G_002110	+
scaffold_10:791834-791849	1-3	CC2G_002110	+
scaffold_10:791849-791902	4	CC2G_002111	-
scaffold_10:791885-791902	4	CC2G_002111	-
scaffold_10:791885-791902	4	CC2G_002111	-
scaffold_10:802018-802085	2	CC2G_002116	-
scaffold_10:807402-807409	2	CC2G_002119	+
scaffold_10:812152-812168	12	CC2G_002120	+
scaffold_10:818761-818784	1	CC2G_002123	+
scaffold_10:818965-818982	2	CC2G_002123	+
scaffold_10:819023-819058	2	CC2G_002123	+
scaffold_10:819150-819156	3	CC2G_002123	+
scaffold_10:829662-829675	8	CC2G_002129	+
scaffold_10:832591-832604	10	CC2G_002130	+
scaffold_10:832761-832820	12	CC2G_002130	+
scaffold_10:838810-838831	4	CC2G_002132	-
scaffold_10:851429-851480	3	CC2G_002137	-
scaffold_10:851440-851480	3	CC2G_002137	-
scaffold_10:851540-851551	2	CC2G_002137	-
scaffold_10:853775-853784	4-5	CC2G_002138	+
scaffold_10:854909-854965	8	CC2G_002138	+
scaffold_10:862574-862627	1	CC2G_002143	+
scaffold_10:864936-865007	8	CC2G_002143	+
scaffold_10:876000-876009	10	CC2G_002149	-
scaffold_10:880378-880420	4	CC2G_002150	+
scaffold_10:880431-880478	5	CC2G_002150	+
scaffold_10:882209-882256	1	CC2G_002151	+
scaffold_10:882256-882297	2	CC2G_002151	+
scaffold_10:887178-887232	13	CC2G_002152	-
scaffold_10:894049-894117	12	CC2G_002154	-
scaffold_10:894254-894327	12	CC2G_002154	-
scaffold_10:896501-896533	2	CC2G_002154	-
scaffold_10:896551-896597	1	CC2G_002154	-
scaffold_10:896921-896973	3	CC2G_002155	-
scaffold_10:902409-902414	3	CC2G_002157	-
scaffold_10:905495-905508	2	CC2G_002158	-
scaffold_10:905495-905508	2	CC2G_002158	-
scaffold_10:906274-906321	1	CC2G_002159	+
scaffold_10:906274-906321	1	CC2G_002159	+
scaffold_10:911219-911289	3	CC2G_002162	-
scaffold_10:911750-911870	1	CC2G_002162	-
scaffold_10:91486-91543	10	CC2G_001820	-
scaffold_10:91742-91791	10	CC2G_001820	-
scaffold_10:927505-927627	4	CC2G_002169	+
scaffold_10:929659-929667	12	CC2G_002169	+
scaffold_10:933779-933809	4	CC2G_002171	+
scaffold_10:933833-933866	4	CC2G_002171	+
scaffold_10:933956-934013	5	CC2G_002171	+
scaffold_10:935221-935233	2	CC2G_002172	+
scaffold_10:935246-935270	2	CC2G_002172	+
scaffold_10:935246-935438	2	CC2G_002172	+
scaffold_10:935270-935301	2	CC2G_002172	+
scaffold_10:947467-947506	1	CC2G_002179	+
scaffold_10:947467-947522	1	CC2G_002179	+
scaffold_10:948123-948187	4	CC2G_002179	+
scaffold_10:949591-949626	4	CC2G_002180	+
scaffold_11:1018363-1018392	2	CC2G_003092	+
scaffold_11:1018363-1018392	2	CC2G_003092	+
scaffold_11:1025262-1025321	2	CC2G_003095	-
scaffold_11:1032740-1032791	10	CC2G_003097	+
scaffold_11:1032821-1032881	13	CC2G_003097	+
scaffold_11:1039215-1039263	7	CC2G_003100	+
scaffold_11:1045883-1045896	2	CC2G_003102	+
scaffold_11:1045938-1045949	2	CC2G_003102	+
scaffold_11:1049397-1049419	4	CC2G_003103	+
scaffold_11:1049468-1049481	4	CC2G_003103	+
scaffold_11:1058990-1059005	1-2	CC2G_003106	-
scaffold_11:1061405-1061426	8	CC2G_003108	-
scaffold_11:106306-106331	7	CC2G_002753	+
scaffold_11:1091076-1091135	1	CC2G_003117	+
scaffold_11:1091127-1091135	1	CC2G_003117	+
scaffold_11:1104002-1104013	4	CC2G_003120	+
scaffold_11:1116839-1116885	1	CC2G_003127	+
scaffold_11:1116931-1116944	1	CC2G_003127	+
scaffold_11:115321-115326	2	CC2G_002757	+
scaffold_11:1225073-1225141	2	CC2G_003156	+
scaffold_11:1228831-1228953	4	CC2G_003156	+
scaffold_11:1232400-1232456	5	CC2G_003157	+
scaffold_11:1233082-1233097	2	CC2G_003158	+
scaffold_11:1237922-1237927	2	CC2G_003159	-
scaffold_11:1254440-1254546	6	CC2G_003164	-
scaffold_11:1254621-1254677	5	CC2G_003164	-
scaffold_11:1257515-1257528	2	CC2G_003165	-
scaffold_11:1273342-1273398	12	CC2G_003168	+
scaffold_11:1273477-1273536	12	CC2G_003168	+
scaffold_11:1282302-1282466	2	CC2G_003171	-
scaffold_11:1331122-1331198	17	CC2G_003187	-
scaffold_11:1331653-1332050	14-16	CC2G_003187	-
scaffold_11:1332222-1332302	14-15	CC2G_003187	-
scaffold_11:1332222-1332422	14-15	CC2G_003187	-
scaffold_11:134309-134371	1	CC2G_002764	-
scaffold_11:1358842-1358901	1	CC2G_003199	+
scaffold_11:1359290-1359343	2	CC2G_003199	+
scaffold_11:1359373-1359392	2	CC2G_003199	+
scaffold_11:1359440-1359466	2	CC2G_003199	+
scaffold_11:1359440-1359466	2	CC2G_003199	+
scaffold_11:1360302-1360365	4	CC2G_003199	+
scaffold_11:1360604-1360656	4	CC2G_003199	+
scaffold_11:1368794-1368809	2	CC2G_003204	+
scaffold_11:1369649-1369661	5	CC2G_003204	+
scaffold_11:1382763-1382770	8	CC2G_003211	-
scaffold_11:1383903-1383955	1	CC2G_003211	-
scaffold_11:1389685-1389748	4	CC2G_003213	-
scaffold_11:1390607-1390665	2	CC2G_003213	-
scaffold_11:1393427-1393622	9	CC2G_003214	+
scaffold_11:1397599-1397652	3	CC2G_003216	-
scaffold_11:140354-140405	11	CC2G_002767	-
scaffold_11:1412020-1412077	1	CC2G_003221	-
scaffold_11:1414143-1414184	2	CC2G_003222	+
scaffold_11:1423410-1423466	14	CC2G_003227	-
scaffold_11:1447512-1447642	7	CC2G_003240	-
scaffold_11:1455208-1455345	1-3	CC2G_003241	-
scaffold_11:1455208-1455371	1-3	CC2G_003241	-
scaffold_11:1459599-1459648	1	CC2G_003243	+
scaffold_11:1460278-1460290	1	CC2G_003243	+
scaffold_11:1460340-1460359	1	CC2G_003243	+
scaffold_11:1490784-1490847	4	CC2G_003254	+
scaffold_11:1498362-1498479	2	CC2G_003258	-
scaffold_11:1498362-1498479	2	CC2G_003258	-
scaffold_11:1498523-1498534	2	CC2G_003258	-
scaffold_11:1498523-1498534	2	CC2G_003258	-
scaffold_11:1516539-1516545	7	CC2G_003265	-
scaffold_11:1534567-1534582	1	CC2G_003273	-
scaffold_11:1545313-1545366	1	CC2G_003278	-
scaffold_11:1578388-1578410	1	CC2G_003288	+
scaffold_11:1578453-1578463	1	CC2G_003288	+
scaffold_11:1586478-1586495	1	CC2G_003292	+
scaffold_11:1586537-1586547	2	CC2G_003292	+
scaffold_11:1607881-1607888	1	CC2G_003302	-
scaffold_11:1608647-1608728	27	CC2G_003304	-
scaffold_11:1608705-1608728	27	CC2G_003304	-
scaffold_11:1609476-1609614	27	CC2G_003304	-
scaffold_11:1619405-1619483	1	CC2G_003305	+
scaffold_11:1623609-1623614	2	CC2G_003307	+
scaffold_11:1631200-1631278	3	CC2G_003309	-
scaffold_11:1655394-1655473	2	CC2G_003320	+
scaffold_11:1657517-1657535	5	CC2G_003322	-
scaffold_11:1657521-1657535	5	CC2G_003322	-
scaffold_11:1657587-1657626	5	CC2G_003322	-
scaffold_11:1686322-1686754	1	CC2G_003334	-
scaffold_11:1686322-1687006	1	CC2G_003334	-
scaffold_11:1701258-1701270	5-6	CC2G_003339	-
scaffold_11:1701462-1701473	4-5	CC2G_003339	-
scaffold_11:1701516-1701533	3-5	CC2G_003339	-
scaffold_11:1709276-1709321	3	CC2G_003343	-
scaffold_11:1714385-1714394	5	CC2G_003348	+
scaffold_11:1714451-1714467	5	CC2G_003348	+
scaffold_11:1731901-1731966	1	CC2G_003360	-
scaffold_11:1741486-1741522	11	CC2G_003363	-
scaffold_11:1741539-1741585	11	CC2G_003363	-
scaffold_11:174273-174340	3	CC2G_002781	-
scaffold_11:1743358-1743407	2	CC2G_003363	-
scaffold_11:1746441-1746496	2	CC2G_003365	-
scaffold_11:1747500-1747554	1	CC2G_003365	-
scaffold_11:1747996-1748002	1	CC2G_003366	-
scaffold_11:1756814-1756824	1	CC2G_003369	+
scaffold_11:1759297-1759361	1	CC2G_003370	+
scaffold_11:1759297-1759361	1	CC2G_003370	+
scaffold_11:1759366-1759422	2	CC2G_003370	+
scaffold_11:1759366-1759422	2	CC2G_003370	+
scaffold_11:1759547-1759608	2	CC2G_003370	+
scaffold_11:1759668-1759736	3	CC2G_003370	+
scaffold_11:1772080-1772171	3	CC2G_003378	-
scaffold_11:1773990-1774007	10	CC2G_003379	-
scaffold_11:1774042-1774062	9	CC2G_003379	-
scaffold_11:1789979-1790061	1	CC2G_003384	+
scaffold_11:1790040-1790061	1	CC2G_003384	+
scaffold_11:1790051-1790061	1	CC2G_003384	+
scaffold_11:1790051-1790172	1	CC2G_003384	+
scaffold_11:1790123-1790172	1	CC2G_003384	+
scaffold_11:1790123-1790280	1	CC2G_003384	+
scaffold_11:179839-179892	3	CC2G_002784	+
scaffold_11:1806518-1806543	3	CC2G_003389	+
scaffold_11:1806524-1806543	3	CC2G_003389	+
scaffold_11:1815747-1815809	6	CC2G_003395	+
scaffold_11:1819352-1819408	5	CC2G_003396	+
scaffold_11:1831941-1831955	5	CC2G_003400	-
scaffold_11:1876892-1876903	2	CC2G_003417	+
scaffold_11:1876945-1877001	3	CC2G_003417	+
scaffold_11:1877217-1877252	4	CC2G_003417	+
scaffold_11:1877236-1877252	4	CC2G_003417	+
scaffold_11:1877343-1877395	5	CC2G_003417	+
scaffold_11:187735-187793	9	CC2G_002787	+
scaffold_11:1879533-1879545	1	CC2G_003418	-
scaffold_11:1879585-1879598	1	CC2G_003418	-
scaffold_11:1885092-1885115	8	CC2G_003422	-
scaffold_11:1885092-1885115	8	CC2G_003422	-
scaffold_11:1885161-1885181	7	CC2G_003422	-
scaffold_11:1885161-1885181	7	CC2G_003422	-
scaffold_11:1885772-1885833	5	CC2G_003422	-
scaffold_11:1886442-1886449	2	CC2G_003422	-
scaffold_11:1886442-1886449	2	CC2G_003422	-
scaffold_11:1886497-1886507	2	CC2G_003422	-
scaffold_11:1886497-1886507	2	CC2G_003422	-
scaffold_11:1886614-1886629	1	CC2G_003422	-
scaffold_11:1886672-1886682	1	CC2G_003422	-
scaffold_11:1886672-1886682	1	CC2G_003422	-
scaffold_11:1893578-1893615	4	CC2G_003425	-
scaffold_11:1893631-1893670	3	CC2G_003425	-
scaffold_11:1910170-1910197	2	CC2G_003432	-
scaffold_11:1910247-1910513	2	CC2G_003432	-
scaffold_11:1910522-1910551	2	CC2G_003432	-
scaffold_11:1910522-1910620	2	CC2G_003432	-
scaffold_11:1948837-1948846	3	CC2G_003451	-
scaffold_11:1952229-1952518	2	CC2G_003452	+
scaffold_11:1952589-1952757	2	CC2G_003452	+
scaffold_11:1952589-1952757	2	CC2G_003452	+
scaffold_11:1957691-1957745	2	CC2G_003454	+
scaffold_11:1964780-1964785	2	CC2G_003460	+
scaffold_11:2054142-2054148	1	CC2G_003493	+
scaffold_11:2134413-2134475	3	CC2G_003526	-
scaffold_11:2134476-2134530	2	CC2G_003526	-
scaffold_11:2140845-2140897	5-6	CC2G_003528	+
scaffold_11:2161954-2161961	1	CC2G_003543	+
scaffold_11:2166366-2166443	4	CC2G_003546	-
scaffold_11:259169-259179	1	CC2G_002814	-
scaffold_11:269450-269509	3	CC2G_002819	-
scaffold_11:269509-269515	3	CC2G_002819	-
scaffold_11:269515-269537	3	CC2G_002819	-
scaffold_11:269638-269655	2	CC2G_002819	-
scaffold_11:270939-270985	1	CC2G_002820	+
scaffold_11:272024-272076	6	CC2G_002820	+
scaffold_11:303740-303807	5	CC2G_002833	-
scaffold_11:307728-307823	2	CC2G_002834	-
scaffold_11:339271-339327	2	CC2G_002847	+
scaffold_11:369294-369308	1	CC2G_002860	+
scaffold_11:369353-369368	1	CC2G_002860	+
scaffold_11:369368-369375	2	CC2G_002860	+
scaffold_11:374087-374274	5	CC2G_002862	+
scaffold_11:379678-379740	3	CC2G_002866	-
scaffold_11:425357-425401	2	CC2G_002884	-
scaffold_11:426108-426175	1	CC2G_002885	-
scaffold_11:426315-426338	1	CC2G_002885	-
scaffold_11:426315-426338	1	CC2G_002885	-
scaffold_11:432407-432413	1	CC2G_002888	+
scaffold_11:437564-437572	3	CC2G_002890	+
scaffold_11:441531-441598	13	CC2G_002890	+
scaffold_11:468147-468207	36	CC2G_002895	-
scaffold_11:489667-489718	2	CC2G_002901	+
scaffold_11:491614-491636	7-9	CC2G_002902	-
scaffold_11:537600-537657	5	CC2G_002918	-
scaffold_11:538247-538253	3	CC2G_002918	-
scaffold_11:554712-554732	1	CC2G_002923	+
scaffold_11:556317-556371	4	CC2G_002923	+
scaffold_11:620209-620265	8	CC2G_002951	+
scaffold_11:623672-623725	6	CC2G_002954	-
scaffold_11:642532-642617	1	CC2G_002966	-
scaffold_11:642579-642617	1	CC2G_002966	-
scaffold_11:650278-650413	4	CC2G_002969	+
scaffold_11:652790-652809	1-3	CC2G_002970	-
scaffold_11:734653-734671	7	CC2G_002994	+
scaffold_11:737547-737556	6	CC2G_002995	+
scaffold_11:757397-757484	8	CC2G_003004	+
scaffold_11:760098-760135	4	CC2G_003006	+
scaffold_11:760222-760246	5	CC2G_003006	+
scaffold_11:772161-772219	2	CC2G_003010	-
scaffold_11:773318-773379	1	CC2G_003010	-
scaffold_11:78756-78810	2	CC2G_002739	-
scaffold_11:796701-796762	2	CC2G_003019	-
scaffold_11:809666-809717	7	CC2G_003024	+
scaffold_11:812005-812026	4	CC2G_003025	+
scaffold_11:815598-815712	11	CC2G_003026	-
scaffold_11:815734-815842	11	CC2G_003026	-
scaffold_11:817568-817580	7	CC2G_003026	-
scaffold_11:817622-817637	6	CC2G_003026	-
scaffold_11:819781-819848	1	CC2G_003027	+
scaffold_11:833227-833279	5	CC2G_003032	-
scaffold_11:834198-834254	1	CC2G_003032	-
scaffold_11:839520-839578	4	CC2G_003035	+
scaffold_11:843644-843697	3	CC2G_003037	-
scaffold_11:847866-847923	1	CC2G_003039	+
scaffold_11:857420-857470	2	CC2G_003044	-
scaffold_11:857420-857470	2	CC2G_003044	-
scaffold_11:874891-874949	4	CC2G_003053	-
scaffold_11:879170-879181	2	CC2G_003055	-
scaffold_11:971676-971731	1	CC2G_003081	+
scaffold_11:995112-995128	7	CC2G_003089	+
scaffold_11:995169-995192	8	CC2G_003089	+
scaffold_12:1000090-1000156	3	CC2G_003944	-
scaffold_12:1002221-1002272	3	CC2G_003945	+
scaffold_12:1013987-1014052	1	CC2G_003949	-
scaffold_12:1023151-1023158	2	CC2G_003954	-
scaffold_12:1028449-1028505	5	CC2G_003957	-
scaffold_12:1034182-1034231	11	CC2G_003960	-
scaffold_12:1036748-1036828	3	CC2G_003961	+
scaffold_12:1036875-1036888	3	CC2G_003961	+
scaffold_12:1037260-1037269	4	CC2G_003961	+
scaffold_12:1040057-1040116	1	CC2G_003962	-
scaffold_12:1043440-1043507	8	CC2G_003963	+
scaffold_12:1063168-1063188	12	CC2G_003969	+
scaffold_12:1063222-1063297	13	CC2G_003969	+
scaffold_12:1064796-1064863	3	CC2G_003970	+
scaffold_12:1064925-1064950	4	CC2G_003970	+
scaffold_12:1074537-1074593	1	CC2G_003975	-
scaffold_12:1077340-1077348	1	CC2G_003977	-
scaffold_12:1078494-1078500	3	CC2G_003979	+
scaffold_12:1087347-1087361	5	CC2G_003982	-
scaffold_12:1087347-1087361	5	CC2G_003982	-
scaffold_12:1087350-1087361	5	CC2G_003982	-
scaffold_12:1087391-1087449	4	CC2G_003982	-
scaffold_12:1115693-1115754	4	CC2G_003991	-
scaffold_12:1115775-1115847	4	CC2G_003991	-
scaffold_12:1127951-1128009	17	CC2G_003993	+
scaffold_12:1139204-1139223	7	CC2G_003998	+
scaffold_12:1141870-1141929	3	CC2G_003999	+
scaffold_12:114299-114329	4	CC2G_003596	-
scaffold_12:114388-114419	3	CC2G_003596	-
scaffold_12:1150534-1150637	1	CC2G_004003	+
scaffold_12:1157699-1157755	1	CC2G_004007	+
scaffold_12:1158257-1158679	1-2	CC2G_004007	+
scaffold_12:1158928-1159047	3-4	CC2G_004007	+
scaffold_12:1161927-1161983	2	CC2G_004008	+
scaffold_12:118380-118392	4	CC2G_003597	+
scaffold_12:1279519-1279528	2	CC2G_004040	-
scaffold_12:1284715-1284776	2	CC2G_004043	-
scaffold_12:1285954-1285963	1	CC2G_004043	-
scaffold_12:1297650-1297729	1	CC2G_004048	+
scaffold_12:1298439-1298449	3	CC2G_004048	+
scaffold_12:1300600-1300623	2	CC2G_004050	+
scaffold_12:1300600-1300671	2	CC2G_004050	+
scaffold_12:1300800-1300853	3	CC2G_004050	+
scaffold_12:1348908-1348949	1	CC2G_004067	-
scaffold_12:1348963-1349014	1	CC2G_004067	-
scaffold_12:1383636-1383756	2	CC2G_004082	+
scaffold_12:1383961-1384022	2	CC2G_004082	+
scaffold_12:1384755-1384846	7	CC2G_004082	+
scaffold_12:1396321-1396415	2	CC2G_004086	-
scaffold_12:1397407-1397439	2	CC2G_004087	+
scaffold_12:1426229-1426290	5	CC2G_004100	+
scaffold_12:1445215-1445272	1	CC2G_004107	-
scaffold_12:1447046-1447102	3	CC2G_004108	-
scaffold_12:1447230-1447245	2	CC2G_004108	-
scaffold_12:1450875-1450950	1	CC2G_004109	-
scaffold_12:1455089-1455251	3	CC2G_004111	+
scaffold_12:1466537-1466597	3	CC2G_004116	+
scaffold_12:1469709-1469759	2	CC2G_004118	+
scaffold_12:1478893-1478904	2	CC2G_004123	+
scaffold_12:1478946-1478962	2	CC2G_004123	+
scaffold_12:1497475-1497526	2	CC2G_004130	+
scaffold_12:1498735-1498746	5	CC2G_004130	+
scaffold_12:1500844-1500855	1	CC2G_004131	-
scaffold_12:1500898-1500919	1	CC2G_004131	-
scaffold_12:1500898-1500919	1	CC2G_004131	-
scaffold_12:1511221-1511276	4	CC2G_004136	+
scaffold_12:1515563-1515574	4	CC2G_004138	+
scaffold_12:1515616-1515630	4	CC2G_004138	+
scaffold_12:1517542-1517611	1	CC2G_004139	+
scaffold_12:1521602-1521622	6-8	CC2G_004140	+
scaffold_12:153308-153313	16	CC2G_003611	-
scaffold_12:1536668-1536731	4	CC2G_004143	-
scaffold_12:1544804-1544859	5	CC2G_004147	-
scaffold_12:1544804-1544862	5	CC2G_004147	-
scaffold_12:1556865-1556876	2	CC2G_004151	+
scaffold_12:1582056-1582061	2	CC2G_004165	-
scaffold_12:1585861-1585926	1	CC2G_004167	-
scaffold_12:1589695-1589709	6-7	CC2G_004168	-
scaffold_12:1589754-1589778	5-7	CC2G_004168	-
scaffold_12:1590990-1591053	1	CC2G_004168	-
scaffold_12:1603176-1603217	3	CC2G_004173	+
scaffold_12:1615396-1615411	4	CC2G_004179	-
scaffold_12:1616055-1616070	1	CC2G_004179	-
scaffold_12:1702896-1702904	1	CC2G_004207	+
scaffold_12:1711440-1711491	1	CC2G_004209	+
scaffold_12:1711497-1711556	2	CC2G_004209	+
scaffold_12:1716278-1716296	3	CC2G_004210	+
scaffold_12:1716278-1716305	3	CC2G_004210	+
scaffold_12:1722092-1722170	1	CC2G_004215	+
scaffold_12:1752192-1752254	1	CC2G_004227	-
scaffold_12:1765305-1765316	9	CC2G_004232	+
scaffold_12:1765546-1765577	11	CC2G_004232	+
scaffold_12:1765620-1765638	11	CC2G_004232	+
scaffold_12:1780786-1780844	5	CC2G_004238	+
scaffold_12:178890-178927	4	CC2G_003622	+
scaffold_12:178944-178983	5	CC2G_003622	+
scaffold_12:178944-178983	5	CC2G_003622	+
scaffold_12:179285-179352	5	CC2G_003622	+
scaffold_12:1794794-1794846	3	CC2G_004243	+
scaffold_12:181695-181747	9	CC2G_003623	-
scaffold_12:181747-181814	9	CC2G_003623	-
scaffold_12:181923-181935	7	CC2G_003623	-
scaffold_12:181935-181940	7	CC2G_003623	-
scaffold_12:181935-181944	7	CC2G_003623	-
scaffold_12:182014-182029	6	CC2G_003623	-
scaffold_12:182074-182090	6	CC2G_003623	-
scaffold_12:182101-182161	5	CC2G_003623	-
scaffold_12:1835271-1835325	5	CC2G_004262	-
scaffold_12:1846149-1846212	2	CC2G_004264	-
scaffold_12:1876270-1876312	6	CC2G_004275	+
scaffold_12:1881153-1881160	13	CC2G_004277	-
scaffold_12:1884730-1884847	4	CC2G_004277	-
scaffold_12:189213-189287	8-9	CC2G_003625	+
scaffold_12:1925953-1925960	13	CC2G_004295	+
scaffold_12:1926028-1926050	14	CC2G_004295	+
scaffold_12:1939673-1939754	2	CC2G_004303	-
scaffold_12:1945971-1945984	3	CC2G_004306	-
scaffold_12:1950443-1950521	3	CC2G_004309	-
scaffold_12:1952593-1952605	2	CC2G_004310	-
scaffold_12:1955171-1955359	5	CC2G_004311	-
scaffold_12:1969312-1969371	2	CC2G_004316	-
scaffold_12:2010606-2010659	2-3	CC2G_004335	+
scaffold_12:2010743-2010791	1	CC2G_004335	+
scaffold_12:2011961-2011982	3-5	CC2G_004335	+
scaffold_12:2011982-2012034	7	CC2G_004335	+
scaffold_12:2012022-2012034	7	CC2G_004335	+
scaffold_12:2012488-2012573	9	CC2G_004335	+
scaffold_12:2085945-2085951	1	CC2G_004365	-
scaffold_12:2119748-2119802	2	CC2G_004381	-
scaffold_12:2119845-2119916	1	CC2G_004381	-
scaffold_12:2120917-2120927	1	CC2G_004382	+
scaffold_12:2121071-2121080	2	CC2G_004382	+
scaffold_12:2121071-2121080	2	CC2G_004382	+
scaffold_12:2121073-2121080	2	CC2G_004382	+
scaffold_12:2121073-2121080	2	CC2G_004382	+
scaffold_12:2121232-2121238	3	CC2G_004382	+
scaffold_12:2138220-2138248	4	CC2G_004389	+
scaffold_12:2143401-2143542	1	CC2G_004391	+
scaffold_12:2154603-2154650	2	CC2G_004396	-
scaffold_12:2154931-2154960	1	CC2G_004396	-
scaffold_12:2154931-2154960	1	CC2G_004396	-
scaffold_12:2155007-2155021	1	CC2G_004396	-
scaffold_12:2155007-2155021	1	CC2G_004396	-
scaffold_12:2161681-2161689	5	CC2G_004399	-
scaffold_12:253842-253860	1	CC2G_003647	+
scaffold_12:253847-253860	2	CC2G_003647	+
scaffold_12:257971-257993	10	CC2G_003648	+
scaffold_12:266740-266804	1	CC2G_003654	-
scaffold_12:275780-275833	1	CC2G_003658	+
scaffold_12:276232-276246	2	CC2G_003658	+
scaffold_12:289118-289187	3	CC2G_003663	-
scaffold_12:316157-316223	6	CC2G_003669	+
scaffold_12:317728-317776	3	CC2G_003671	+
scaffold_12:317733-317776	4	CC2G_003671	+
scaffold_12:317817-317828	4	CC2G_003671	+
scaffold_12:319040-319105	1	CC2G_003674	+
scaffold_12:328582-328587	7	CC2G_003680	+
scaffold_12:34131-34825	1	CC2G_003568	+
scaffold_12:367739-367798	2	CC2G_003690	-
scaffold_12:368502-368554	2	CC2G_003690	-
scaffold_12:369997-370062	1	CC2G_003690	-
scaffold_12:370090-370143	1	CC2G_003690	-
scaffold_12:371958-372022	9	CC2G_003691	-
scaffold_12:373292-373298	4	CC2G_003691	-
scaffold_12:421574-421630	3	CC2G_003709	+
scaffold_12:422931-422985	9	CC2G_003709	+
scaffold_12:423082-423095	10	CC2G_003709	+
scaffold_12:423296-423511	10	CC2G_003709	+
scaffold_12:425281-425294	1	CC2G_003710	+
scaffold_12:425402-425428	2	CC2G_003710	+
scaffold_12:425476-425481	3	CC2G_003710	+
scaffold_12:426317-426376	5	CC2G_003710	+
scaffold_12:42632-42702	1	CC2G_003570	+
scaffold_12:426369-426376	5	CC2G_003710	+
scaffold_12:42715-43013	1	CC2G_003570	+
scaffold_12:42715-43385	1	CC2G_003570	+
scaffold_12:433970-434449	11	CC2G_003714	-
scaffold_12:448878-449277	6	CC2G_003718	+
scaffold_12:461963-461967	2	CC2G_003726	+
scaffold_12:461963-461972	1	CC2G_003726	+
scaffold_12:462262-462308	4	CC2G_003726	+
scaffold_12:467492-467547	4	CC2G_003729	+
scaffold_12:473268-473280	2	CC2G_003731	+
scaffold_12:473622-473673	3	CC2G_003731	+
scaffold_12:473673-473681	4	CC2G_003731	+
scaffold_12:50093-50102	9	CC2G_003573	-
scaffold_12:522772-522840	4	CC2G_003753	+
scaffold_12:528602-528661	7	CC2G_003757	-
scaffold_12:58513-58586	1	CC2G_003576	+
scaffold_12:631923-631936	2	CC2G_003797	+
scaffold_12:632113-632181	1	CC2G_003798	-
scaffold_12:66737-66813	3	CC2G_003579	+
scaffold_12:695938-696036	1	CC2G_003825	-
scaffold_12:715990-716035	4	CC2G_003831	-
scaffold_12:730301-730310	5	CC2G_003834	-
scaffold_12:730355-730378	5	CC2G_003834	-
scaffold_12:742985-743002	8	CC2G_003841	-
scaffold_12:743041-743057	8	CC2G_003841	-
scaffold_12:744026-744031	2	CC2G_003841	-
scaffold_12:750159-750174	2	CC2G_003846	-
scaffold_12:750217-750229	2	CC2G_003846	-
scaffold_12:770837-770853	3	CC2G_003851	+
scaffold_12:770837-770853	3	CC2G_003851	+
scaffold_12:770931-770936	3	CC2G_003851	+
scaffold_12:771504-771518	2	CC2G_003852	-
scaffold_12:771504-771518	2	CC2G_003852	-
scaffold_12:772163-772179	1	CC2G_003853	+
scaffold_12:795442-795447	9	CC2G_003860	+
scaffold_12:807494-807550	3	CC2G_003865	-
scaffold_12:812048-812081	4	CC2G_003867	-
scaffold_12:812102-812130	3	CC2G_003867	-
scaffold_12:850615-850688	3	CC2G_003882	-
scaffold_12:851138-851162	2	CC2G_003882	-
scaffold_12:852140-852205	2	CC2G_003882	-
scaffold_12:859716-859774	1	CC2G_003885	+
scaffold_12:866266-866291	3	CC2G_003888	+
scaffold_12:879467-879525	1	CC2G_003894	+
scaffold_12:879740-879830	1	CC2G_003894	+
scaffold_12:879847-879885	1	CC2G_003894	+
scaffold_12:881446-881461	4	CC2G_003894	+
scaffold_12:881502-881513	4	CC2G_003894	+
scaffold_12:889177-889263	2	CC2G_003897	-
scaffold_12:890086-890151	1	CC2G_003898	+
scaffold_12:890151-890307	1	CC2G_003898	+
scaffold_12:890259-890307	2	CC2G_003898	+
scaffold_12:890307-890319	2-4	CC2G_003898	+
scaffold_12:892025-892078	8	CC2G_003898	+
scaffold_12:892098-892155	8	CC2G_003898	+
scaffold_12:892388-892441	12	CC2G_003898	+
scaffold_12:899479-899632	4	CC2G_003902	+
scaffold_12:902804-902857	1	CC2G_003904	+
scaffold_12:907975-908038	4	CC2G_003906	-
scaffold_12:927890-927948	6	CC2G_003915	-
scaffold_12:944401-944487	5	CC2G_003922	+
scaffold_12:953737-953763	2	CC2G_003924	-
scaffold_12:953737-953763	2	CC2G_003924	-
scaffold_12:956264-956279	1	CC2G_003925	+
scaffold_12:958281-958333	4	CC2G_003927	-
scaffold_12:965071-965135	1	CC2G_003931	+
scaffold_12:965811-965863	7	CC2G_003931	+
scaffold_12:969461-969520	5	CC2G_003933	-
scaffold_12:971543-971593	4	CC2G_003933	-
scaffold_12:971543-971623	4	CC2G_003933	-
scaffold_12:981177-981236	3	CC2G_003937	-
scaffold_12:994618-994677	2	CC2G_003940	+
scaffold_12:997400-997462	1	CC2G_003941	-
scaffold_12:999147-999179	2	CC2G_003943	-
scaffold_12:999212-999240	1	CC2G_003943	-
scaffold_13:1013351-1013357	1	CC2G_004798	+
scaffold_13:1013402-1013412	2	CC2G_004798	+
scaffold_13:1017354-1017495	4	CC2G_004799	-
scaffold_13:1018771-1018779	1	CC2G_004800	+
scaffold_13:1018771-1018779	1	CC2G_004800	+
scaffold_13:118407-118592	1	CC2G_004446	-
scaffold_13:228882-228976	10	CC2G_004487	-
scaffold_13:229766-229838	9	CC2G_004487	-
scaffold_13:230671-230720	7	CC2G_004487	-
scaffold_13:239522-239595	1	CC2G_004491	+
scaffold_13:239661-239692	1	CC2G_004491	+
scaffold_13:250853-250924	5	CC2G_004496	-
scaffold_13:308670-308702	4-5	CC2G_004519	-
scaffold_13:310296-310355	1	CC2G_004519	-
scaffold_13:324304-324361	1	CC2G_004526	+
scaffold_13:36665-36719	7	CC2G_004416	-
scaffold_13:372557-372612	3	CC2G_004546	+
scaffold_13:387256-387405	5	CC2G_004555	+
scaffold_13:419245-419552	6	CC2G_004568	-
scaffold_13:424223-424469	2	CC2G_004569	-
scaffold_13:434467-434475	1-2	CC2G_004574	+
scaffold_13:435056-435136	5	CC2G_004574	+
scaffold_13:440204-440304	9	CC2G_004577	-
scaffold_13:440224-440304	9	CC2G_004577	-
scaffold_13:441109-441126	6	CC2G_004577	-
scaffold_13:441180-441191	6	CC2G_004577	-
scaffold_13:445255-445262	2	CC2G_004579	+
scaffold_13:447493-447561	8	CC2G_004579	+
scaffold_13:451492-451563	14	CC2G_004579	+
scaffold_13:462386-462424	3	CC2G_004585	+
scaffold_13:462480-462494	4	CC2G_004585	+
scaffold_13:462670-462722	5	CC2G_004585	+
scaffold_13:464384-464399	3	CC2G_004586	-
scaffold_13:464384-464399	3	CC2G_004586	-
scaffold_13:464399-464448	3	CC2G_004586	-
scaffold_13:477938-477956	4	CC2G_004590	+
scaffold_13:478004-478035	4	CC2G_004590	+
scaffold_13:521426-521476	4	CC2G_004603	+
scaffold_13:522219-522237	20	CC2G_004604	-
scaffold_13:522219-522279	20	CC2G_004604	-
scaffold_13:522333-522357	20	CC2G_004604	-
scaffold_13:522402-522414	19	CC2G_004604	-
scaffold_13:522402-522414	19	CC2G_004604	-
scaffold_13:522509-522526	18	CC2G_004604	-
scaffold_13:522667-522739	17	CC2G_004604	-
scaffold_13:523337-523353	13	CC2G_004604	-
scaffold_13:523398-523415	12	CC2G_004604	-
scaffold_13:538458-538483	2	CC2G_004611	+
scaffold_13:538640-538648	2	CC2G_004611	+
scaffold_13:548658-548725	14	CC2G_004614	+
scaffold_13:556026-556084	7	CC2G_004617	-
scaffold_13:557747-557758	3	CC2G_004617	-
scaffold_13:576278-576289	15	CC2G_004626	-
scaffold_13:578102-578109	2	CC2G_004626	-
scaffold_13:591467-591530	9	CC2G_004633	+
scaffold_13:592975-592980	3-5	CC2G_004635	-
scaffold_13:595178-595183	2-3	CC2G_004635	-
scaffold_13:598974-598991	2	CC2G_004637	-
scaffold_13:605889-605933	17	CC2G_004640	-
scaffold_13:606130-606187	16	CC2G_004640	-
scaffold_13:606199-606244	16	CC2G_004640	-
scaffold_13:621224-621229	4	CC2G_004644	+
scaffold_13:621277-621296	4	CC2G_004644	+
scaffold_13:621401-621423	5	CC2G_004644	+
scaffold_13:621471-621482	5	CC2G_004644	+
scaffold_13:621567-621584	7	CC2G_004644	+
scaffold_13:621626-621641	7	CC2G_004644	+
scaffold_13:622320-622355	10	CC2G_004644	+
scaffold_13:622373-622413	11	CC2G_004644	+
scaffold_13:625026-625081	1	CC2G_004646	+
scaffold_13:630636-630649	2	CC2G_004649	+
scaffold_13:640011-640033	4	CC2G_004654	-
scaffold_13:647632-647640	1	CC2G_004658	-
scaffold_13:647632-647689	1	CC2G_004658	-
scaffold_13:658345-658416	1	CC2G_004661	+
scaffold_13:670873-670879	9	CC2G_004664	+
scaffold_13:670933-670955	9	CC2G_004664	+
scaffold_13:685845-685862	1	CC2G_004668	+
scaffold_13:710458-710542	7	CC2G_004677	+
scaffold_13:711579-711588	2	CC2G_004678	+
scaffold_13:717399-717416	1	CC2G_004680	+
scaffold_13:717399-717462	1	CC2G_004680	+
scaffold_13:717416-717521	1	CC2G_004680	+
scaffold_13:717462-717521	2	CC2G_004680	+
scaffold_13:717462-717521	2	CC2G_004680	+
scaffold_13:717462-717561	2	CC2G_004680	+
scaffold_13:717521-717561	2	CC2G_004680	+
scaffold_13:717562-717608	2	CC2G_004680	+
scaffold_13:722114-722165	1	CC2G_004682	-
scaffold_13:722714-722765	1	CC2G_004682	-
scaffold_13:724019-724068	3	CC2G_004683	+
scaffold_13:736204-736270	6	CC2G_004690	+
scaffold_13:740538-740565	2	CC2G_004692	+
scaffold_13:745779-745844	6	CC2G_004696	-
scaffold_13:754716-754778	2	CC2G_004699	-
scaffold_13:776171-776224	2	CC2G_004709	-
scaffold_13:785215-785273	2	CC2G_004712	+
scaffold_13:785576-785585	3	CC2G_004712	+
scaffold_13:785576-785588	3	CC2G_004712	+
scaffold_13:796609-796679	5	CC2G_004717	+
scaffold_13:815888-815944	4	CC2G_004724	-
scaffold_13:821902-821963	3	CC2G_004727	-
scaffold_13:824104-824118	2	CC2G_004728	+
scaffold_13:848038-848056	2	CC2G_004740	+
scaffold_13:857341-857392	1	CC2G_004744	-
scaffold_13:857693-857753	1	CC2G_004745	+
scaffold_13:858480-858534	4	CC2G_004745	+
scaffold_13:859685-859691	1	CC2G_004747	+
scaffold_13:859685-859701	1	CC2G_004747	+
scaffold_13:865437-865662	2	CC2G_004750	-
scaffold_13:898591-898648	2	CC2G_004763	-
scaffold_13:907577-907588	3-5	CC2G_004765	+
scaffold_13:907629-907649	4-5	CC2G_004765	+
scaffold_13:908387-908451	4-6	CC2G_004765	+
scaffold_13:925952-925959	4	CC2G_004773	-
scaffold_13:930183-930234	1	CC2G_004775	+
scaffold_13:936128-936180	6	CC2G_004775	+
scaffold_13:940960-940977	2	CC2G_004778	+
scaffold_13:951532-951554	3	CC2G_004781	+
scaffold_13:951721-951794	4	CC2G_004781	+
scaffold_13:951721-951815	4	CC2G_004781	+
scaffold_13:951786-951815	4	CC2G_004781	+
scaffold_13:951909-952009	4	CC2G_004781	+
scaffold_13:952009-952062	5	CC2G_004781	+
scaffold_13:990638-990693	5	CC2G_004790	+
scaffold_13:993211-993273	8	CC2G_004790	+
scaffold_15:47572-47607	2	CC2G_004850	+
scaffold_15:47572-47607	2	CC2G_004850	+
scaffold_15:47648-47664	2	CC2G_004850	+
scaffold_15:47648-47664	2	CC2G_004850	+
scaffold_15:52352-52415	11	CC2G_004853	-
scaffold_15:71183-71210	5	CC2G_004859	+
scaffold_15:88411-88771	3	CC2G_004864	-
scaffold_15:89099-89118	2	CC2G_004864	-
scaffold_15:89161-89169	2	CC2G_004864	-
scaffold_16:29441-29463	2	CC2G_004885	-
scaffold_16:46834-46902	2	CC2G_004895	+
scaffold_16:46995-47056	3	CC2G_004895	+
scaffold_16:92382-92387	20	CC2G_004922	-
scaffold_16:96213-96269	1	CC2G_004923	-
scaffold_17:12787-12843	11	CC2G_004929	+
scaffold_17:23715-23771	5	CC2G_004933	-
scaffold_17:54363-54425	1	CC2G_004948	+
[truncated: 4,870 more rows]
