# Supplementary material for: The Genome-Wide Characterization of Alternative Splicing and RNA Editing in the Development of Coprinopsis cinerea
Source: J Fungi (Basel). 2023 Sep 9;9(9):915. doi: 10.3390/jof9090915 (PMC10532568; doi:10.3390/jof9090915)
Supplement: Supplementary file 1 [file jof-09-00915-s001.zip › DatasetS4_RNA_editing.editing_level.xlsx]

## Sheet: RE.matrix
Region	Position	Reference	AllSubs	Strand	gCoverage.q25	gMeanQ	gBaseCount.A.C.G.T.	BS1	BS2	BS3	BS12h1	BS12h2	BS12h3	BS24h1	BS24h2	BS24h3	Myc1	Myc2	Myc3	Oidia1	Oidia2	Oidia3	Scl1	Scl2	Scl3	Knot1	Knot2	Knot3	Pri1	Pri2	Pri3	YFB1	YFB2	YFB3
scaffold_1	1061898	T	TC	2	23	38.35	[0, 0, 0, 23]	NA	NA	NA	NA	NA	NA	NA	NA	NA	NA	NA	0.04	0.03	0.02	NA	0.04	0.05	0.02	0.04	NA	NA	0.03	0.02	0.03	NA	NA	NA
scaffold_1	1303571	T	TC	2	30	38.97	[0, 0, 0, 30]	NA	NA	NA	NA	NA	NA	NA	NA	NA	NA	NA	0.08	0.04	0.03	NA	0.09	NA	0.03	0.06	NA	NA	NA	0.09	0.06	0.06	NA	0.04
scaffold_1	1525684	T	TC	2	27	39.85	[0, 0, 0, 27]	NA	0.12	NA	NA	NA	NA	NA	NA	NA	NA	NA	NA	NA	NA	NA	0.06	0.03	0.07	NA	NA	NA	NA	NA	NA	NA	NA	NA
scaffold_1	1567564	T	TC	2	31	37.71	[0, 0, 0, 31]	NA	NA	NA	NA	NA	NA	NA	NA	NA	NA	NA	NA	NA	NA	NA	0.22	0.17	0.28	NA	NA	NA	NA	NA	NA	NA	NA	NA
scaffold_1	166675	T	TC	2	28	38.96	[0, 0, 0, 28]	0.11	0.09	0.07	NA	NA	NA	0.09	0.07	NA	0.08	0.05	0.11	0.05	0.06	0.06	0.08	0.08	0.08	0.08	0.06	0.05	0.09	0.09	0.15	NA	0.09	NA
scaffold_1	167847	T	TC	2	26	38.62	[0, 0, 0, 26]	0.04	0.02	0.02	NA	0.05	NA	NA	NA	NA	0.04	NA	0.03	NA	0.01	NA	0.02	0.02	0.02	0.02	0.02	0.02	NA	NA	NA	NA	NA	NA
scaffold_1	167882	T	TC	2	31	40.03	[0, 0, 0, 31]	NA	0.02	0.03	NA	NA	NA	NA	NA	NA	NA	NA	NA	NA	0.07	NA	0.03	0.05	0.03	0.03	0.03	0.02	NA	NA	NA	NA	NA	NA
scaffold_1	1680797	T	TC	2	28	38.86	[0, 0, 0, 28]	NA	NA	NA	NA	NA	NA	NA	NA	NA	NA	NA	NA	NA	NA	NA	NA	NA	NA	NA	NA	NA	NA	0.04	NA	0.04	NA	0.05
scaffold_1	1759357	T	TC	2	33	39.79	[0, 0, 0, 33]	NA	NA	NA	NA	NA	NA	NA	NA	NA	NA	NA	NA	NA	NA	NA	NA	0.07	0.09	NA	NA	NA	NA	NA	NA	NA	NA	NA
scaffold_1	1817744	T	TC	2	32	39.53	[0, 0, 0, 32]	NA	NA	NA	NA	NA	NA	NA	NA	NA	NA	NA	NA	NA	NA	NA	0.04	NA	0.03	NA	NA	NA	NA	NA	NA	NA	NA	NA
scaffold_1	1849871	A	AG	2	33	38.58	[33, 0, 0, 0]	NA	NA	0.04	NA	NA	NA	NA	NA	NA	NA	NA	NA	NA	NA	NA	0.02	0.03	0.03	0.05	NA	NA	NA	NA	NA	NA	NA	NA
scaffold_1	2116854	C	CG	2	28	38.79	[0, 28, 0, 0]	NA	NA	NA	NA	NA	NA	NA	NA	NA	NA	NA	NA	NA	NA	0.04	0.04	0.03	0.03	NA	NA	NA	NA	NA	NA	NA	NA	NA
scaffold_1	216583	T	TC	2	20	39.35	[0, 0, 0, 20]	0.12	NA	NA	NA	NA	NA	NA	NA	NA	NA	NA	NA	NA	NA	NA	0.07	0.08	0.05	NA	NA	NA	NA	NA	NA	NA	NA	NA
scaffold_1	216590	T	TC	2	22	39.23	[0, 0, 0, 22]	NA	NA	NA	NA	NA	NA	NA	NA	NA	NA	NA	NA	NA	NA	NA	0.05	0.11	0.07	NA	NA	NA	NA	NA	NA	NA	NA	NA
scaffold_1	2215722	T	TC	2	25	39.08	[0, 0, 0, 25]	NA	NA	NA	NA	NA	NA	NA	NA	NA	NA	NA	0.14	NA	NA	NA	0.03	0.04	0.03	0.06	0.07	0.07	NA	NA	0.12	NA	NA	NA
scaffold_1	2486558	T	TC	2	34	38.79	[0, 0, 0, 34]	NA	NA	NA	NA	NA	NA	NA	NA	NA	NA	NA	NA	NA	NA	NA	0.1	0.11	NA	NA	NA	NA	NA	NA	NA	NA	NA	NA
scaffold_1	2522858	C	CT	2	37	39.46	[0, 37, 0, 0]	NA	NA	NA	NA	NA	NA	NA	NA	NA	NA	NA	NA	NA	NA	NA	0.04	NA	0.07	NA	NA	NA	NA	NA	NA	NA	NA	NA
scaffold_1	2525162	T	TC	2	18	39.44	[0, 0, 0, 18]	0.98	0.96	0.93	NA	NA	NA	NA	NA	NA	0.93	0.92	0.9	0.97	0.96	0.96	0.93	0.97	0.93	0.97	0.98	1	0.96	0.89	1	1	0.94	0.96
scaffold_1	2583145	T	TC	2	26	38.77	[0, 0, 0, 26]	NA	NA	NA	NA	NA	NA	0.02	0.02	NA	NA	NA	NA	NA	NA	NA	0.03	0.05	0.04	NA	NA	NA	NA	NA	NA	NA	NA	NA
scaffold_1	2599148	T	TC	2	34	39.71	[0, 0, 0, 34]	NA	0.09	0.06	NA	NA	NA	0.06	0.03	NA	NA	NA	0.03	0.03	NA	NA	0.03	0.03	0.02	NA	NA	NA	NA	NA	0.03	NA	NA	NA
scaffold_1	2801077	T	TC	2	24	38.79	[0, 0, 0, 24]	NA	NA	NA	NA	NA	NA	NA	NA	NA	0.04	0.06	NA	0.03	0.06	0.05	0.06	0.06	0.06	NA	0.05	0.04	NA	NA	NA	NA	NA	0.09
scaffold_1	2803897	T	TC	2	31	38.52	[0, 0, 0, 31]	NA	NA	NA	NA	NA	NA	NA	NA	NA	NA	NA	NA	NA	NA	NA	0.04	NA	0.03	NA	NA	NA	NA	NA	NA	NA	NA	NA
scaffold_1	2814918	T	TC	2	30	40.13	[0, 0, 0, 30]	NA	NA	NA	NA	NA	NA	NA	NA	NA	NA	NA	NA	NA	NA	NA	0.09	0.04	NA	NA	NA	NA	NA	NA	NA	NA	NA	NA
scaffold_1	2848268	T	TC	2	21	38.95	[0, 0, 0, 21]	NA	NA	NA	NA	NA	NA	0.02	NA	NA	0.08	0.04	NA	NA	NA	NA	NA	0.05	0.07	NA	NA	NA	NA	NA	NA	NA	NA	NA
scaffold_1	2876801	G	GA	2	14	37.79	[0, 0, 14, 0]	NA	NA	NA	NA	NA	NA	NA	NA	NA	NA	NA	NA	NA	NA	0.07	NA	NA	NA	0.07	0.06	0.09	NA	0.04	NA	NA	0.04	NA
scaffold_1	301748	G	GT	2	27	39.22	[0, 0, 27, 0]	NA	NA	NA	NA	NA	NA	NA	NA	NA	NA	NA	0.05	0.03	0.03	0.02	NA	NA	NA	NA	NA	NA	NA	NA	NA	NA	NA	NA
scaffold_1	3075489	T	TC	2	28	38.71	[0, 0, 0, 28]	NA	NA	NA	NA	NA	NA	0.3	NA	NA	NA	NA	NA	NA	NA	NA	0.04	0.03	0.02	0.09	NA	NA	NA	NA	NA	NA	NA	NA
scaffold_1	4154720	T	TC	2	29	39.69	[0, 0, 0, 29]	NA	NA	NA	NA	NA	NA	0.04	NA	NA	0.03	0.01	0.02	NA	NA	NA	NA	NA	NA	0.03	0.03	0.02	0.02	NA	NA	0.01	0.02	NA
scaffold_1	4198089	T	TC	2	17	37.65	[0, 0, 0, 17]	NA	NA	NA	NA	NA	NA	NA	NA	NA	NA	NA	0.02	NA	0.02	NA	0.06	NA	0.06	NA	NA	NA	NA	NA	0.03	NA	NA	NA
scaffold_1	46772	T	TC	2	20	39.2	[0, 0, 0, 20]	NA	NA	NA	NA	NA	NA	NA	NA	NA	NA	NA	NA	NA	NA	NA	0.03	0.04	0.08	NA	NA	NA	NA	NA	NA	0.03	NA	0.03
scaffold_1	500517	T	TC	2	18	37.17	[0, 0, 0, 18]	NA	NA	NA	NA	NA	NA	NA	NA	NA	NA	NA	NA	NA	NA	0.15	NA	0.19	NA	0.07	NA	NA	NA	0.06	0.1	0.07	0.08	NA
scaffold_1	58651	T	TC	2	20	40	[0, 0, 0, 20]	NA	NA	NA	NA	NA	NA	NA	0.04	NA	0.05	0.03	0.09	0.04	NA	0.1	0.07	0.07	0.03	0.05	0.07	0.05	NA	NA	NA	NA	NA	NA
scaffold_1	775044	A	AG	2	29	39.31	[29, 0, 0, 0]	NA	NA	NA	NA	NA	NA	0.02	0.04	NA	NA	NA	NA	NA	NA	NA	0.03	0.05	0.09	NA	NA	NA	NA	NA	NA	NA	NA	NA
scaffold_1	842371	T	TC	2	34	39.06	[0, 0, 0, 34]	NA	NA	NA	NA	NA	NA	NA	NA	NA	0.02	0.02	0.02	0.01	0.01	0.02	NA	NA	0.01	0.03	0.02	0.03	NA	NA	NA	NA	NA	NA
scaffold_1	877131	T	TC	2	25	38.32	[0, 0, 0, 25]	NA	NA	NA	NA	NA	NA	NA	NA	NA	NA	NA	NA	NA	NA	NA	NA	NA	NA	NA	NA	NA	NA	NA	NA	0.03	0.04	0.04
scaffold_10	104083	T	TC	2	30	38.97	[0, 0, 0, 30]	NA	NA	NA	NA	NA	NA	NA	NA	NA	0.04	0.04	NA	NA	NA	NA	0.05	0.06	0.04	NA	0.03	NA	NA	NA	NA	NA	NA	NA
scaffold_10	1070182	T	TC	2	31	39.29	[0, 0, 0, 31]	0.06	0.04	0.02	NA	NA	NA	NA	NA	NA	NA	NA	NA	NA	NA	NA	NA	NA	NA	NA	NA	NA	NA	NA	NA	NA	NA	NA
scaffold_10	1276619	T	TC	2	16	37.12	[0, 0, 0, 16]	NA	NA	NA	NA	NA	NA	NA	NA	NA	NA	NA	NA	NA	NA	NA	NA	NA	NA	NA	NA	NA	NA	0.03	0.05	NA	NA	NA
scaffold_10	1348506	G	GA	2	27	39.56	[0, 0, 27, 0]	NA	NA	NA	NA	NA	NA	NA	NA	NA	NA	0.03	0.05	NA	NA	NA	NA	NA	NA	NA	NA	NA	0.03	NA	NA	0.02	0.03	0.02
scaffold_10	1537431	T	TC	2	28	39.43	[0, 0, 0, 28]	NA	NA	NA	NA	NA	NA	NA	NA	NA	NA	NA	NA	NA	NA	NA	0.07	0.06	NA	NA	NA	NA	NA	NA	NA	NA	NA	NA
scaffold_10	1945912	C	CT	2	29	39.79	[0, 29, 0, 0]	NA	NA	NA	NA	NA	NA	NA	NA	NA	NA	NA	NA	NA	NA	NA	0.03	0.03	NA	NA	NA	NA	NA	NA	NA	NA	NA	NA
scaffold_10	1981253	T	TC	2	25	38.24	[0, 0, 0, 25]	NA	NA	NA	NA	NA	NA	NA	NA	NA	NA	0.01	0.01	NA	NA	0.01	0.03	0.03	0.02	0.01	NA	NA	NA	NA	NA	NA	NA	NA
scaffold_10	834616	T	TC	2	36	39.56	[0, 0, 0, 36]	NA	0.03	0.03	NA	0.07	NA	NA	NA	NA	NA	NA	NA	NA	NA	NA	NA	NA	0.01	NA	0.01	0.02	NA	NA	NA	NA	NA	NA
scaffold_11	1030266	T	TC	2	39	39.44	[0, 0, 0, 39]	NA	NA	NA	NA	NA	NA	NA	NA	NA	NA	NA	NA	NA	NA	NA	0.06	0.11	NA	NA	NA	NA	NA	NA	NA	NA	NA	NA
scaffold_11	1061238	T	TC	2	23	38.52	[0, 0, 0, 23]	NA	NA	NA	NA	NA	NA	NA	NA	NA	0.02	0.04	0.04	NA	NA	NA	NA	NA	NA	NA	NA	NA	NA	NA	NA	NA	NA	NA
scaffold_11	1113291	T	TC	2	17	39.76	[0, 0, 0, 17]	NA	NA	NA	NA	NA	NA	NA	0.12	NA	0.06	NA	0.05	NA	NA	NA	0.06	0.1	0.04	NA	NA	NA	NA	NA	NA	NA	NA	NA
scaffold_11	1716350	T	TC	2	30	38.63	[0,0,0,30]	NA	NA	NA	NA	NA	NA	NA	NA	NA	NA	0.19	0.06	NA	0.12	0.07	0.06	0.03	NA	0.18	0.04	0.7	NA	NA	NA	NA	NA	NA
scaffold_12	934723	T	TC	2	29	38.55	[0, 0, 0, 29]	NA	NA	0.08	NA	NA	NA	NA	NA	NA	NA	NA	NA	NA	NA	NA	0.04	NA	0.04	NA	NA	NA	NA	NA	NA	NA	NA	NA
scaffold_2	1060973	T	TC	2	23	39.22	[0, 0, 0, 23]	NA	NA	NA	NA	NA	NA	0.03	NA	NA	0.02	0.02	NA	NA	NA	0.03	0.01	0.05	0.04	NA	0.05	0.03	0.02	0.03	0.02	NA	NA	NA
scaffold_2	106997	T	TC	2	25	40	[0, 0, 0, 25]	NA	NA	NA	NA	NA	NA	0.01	NA	NA	NA	NA	NA	NA	NA	NA	0.05	0.04	NA	NA	NA	NA	NA	NA	NA	NA	NA	NA
scaffold_2	1221488	T	TC	2	23	39.35	[0, 0, 0, 23]	NA	0.04	NA	NA	NA	NA	NA	0.04	NA	0.03	NA	NA	NA	NA	NA	0.03	0.04	0.02	NA	NA	NA	NA	NA	NA	NA	NA	NA
scaffold_2	1221503	T	TC	2	25	39.2	[0, 0, 0, 25]	NA	NA	NA	NA	NA	NA	NA	NA	NA	NA	NA	NA	NA	NA	NA	0.06	0.07	NA	NA	NA	NA	NA	NA	NA	NA	NA	NA
scaffold_2	1259328	T	TC	2	32	39.47	[0, 0, 0, 32]	NA	NA	NA	NA	NA	NA	NA	NA	NA	NA	NA	NA	NA	NA	NA	0.07	NA	0.06	NA	NA	NA	NA	NA	NA	NA	NA	NA
scaffold_2	1259329	G	GA	2	31	39.29	[0, 0, 31, 0]	NA	NA	NA	NA	NA	NA	NA	NA	NA	NA	NA	NA	NA	NA	NA	0.04	0.03	0.04	NA	NA	NA	NA	NA	NA	NA	NA	NA
scaffold_2	1360698	T	TC	2	21	38.1	[0, 0, 0, 21]	0.06	NA	0.04	NA	NA	NA	NA	NA	NA	NA	NA	NA	NA	NA	NA	NA	NA	0.02	NA	0.02	0.03	NA	NA	NA	NA	NA	NA
scaffold_2	1735269	A	AT	2	16	38.38	[16, 0, 0, 0]	NA	NA	NA	NA	NA	NA	NA	NA	NA	0.03	0.03	0.02	0.02	NA	NA	NA	NA	NA	0.02	0.02	0.03	NA	NA	0.03	NA	NA	NA
scaffold_2	1749556	T	TC	2	25	40.32	[0, 0, 0, 25]	NA	NA	NA	NA	NA	NA	0.11	0.1	NA	NA	NA	NA	NA	NA	NA	0.15	0.13	0.19	NA	NA	NA	NA	NA	NA	NA	NA	NA
scaffold_2	1785435	G	GA	2	33	39.33	[0, 0, 33, 0]	NA	NA	NA	NA	NA	NA	NA	NA	NA	NA	NA	NA	NA	NA	NA	0.05	0.05	NA	NA	NA	NA	NA	NA	NA	NA	NA	NA
scaffold_2	1885302	G	GA	2	28	40.25	[0, 0, 28, 0]	NA	NA	NA	NA	NA	NA	NA	NA	NA	0.03	0.02	0.03	NA	NA	0.02	NA	NA	NA	NA	0.02	NA	0.01	NA	0.02	0.01	0.02	0.02
scaffold_2	2232057	T	TC	2	38	40.21	[0, 0, 0, 38]	NA	0.02	NA	NA	NA	NA	NA	NA	NA	NA	NA	NA	0.04	NA	0.05	NA	NA	NA	NA	NA	NA	NA	0.06	NA	NA	NA	NA
scaffold_2	2371304	T	TC	2	20	39.95	[0, 0, 0, 20]	NA	NA	NA	NA	NA	NA	NA	NA	NA	NA	NA	NA	NA	NA	NA	0.02	0.01	0.02	0.05	0.04	NA	NA	NA	NA	NA	NA	NA
scaffold_2	2381165	A	AG	2	40	39.52	[40, 0, 0, 0]	NA	NA	NA	NA	NA	NA	NA	NA	NA	0.11	0.06	NA	NA	NA	NA	0.19	NA	NA	NA	NA	NA	NA	NA	NA	NA	NA	NA
scaffold_2	2427252	T	TC	2	28	40.07	[0, 0, 0, 28]	NA	NA	NA	NA	NA	NA	NA	NA	NA	NA	NA	NA	NA	NA	NA	0.03	NA	0.03	NA	NA	NA	NA	NA	NA	NA	NA	NA
scaffold_2	2510595	T	TG	2	24	39.92	[0, 0, 0, 24]	NA	NA	NA	NA	NA	NA	NA	NA	NA	NA	NA	NA	NA	NA	NA	0.03	0.03	NA	NA	NA	NA	NA	NA	NA	NA	NA	NA
scaffold_2	2515448	T	TC	2	25	39.72	[0, 0, 0, 25]	NA	NA	NA	NA	NA	NA	NA	NA	NA	NA	NA	NA	NA	0.06	0.05	0.06	NA	0.05	NA	NA	NA	NA	NA	NA	NA	NA	NA
scaffold_2	2529690	G	GT	2	18	39.06	[0, 0, 18, 0]	0.05	0.04	NA	NA	NA	NA	0.01	0.03	NA	0.02	NA	NA	NA	0.03	0.02	NA	NA	NA	0.02	NA	NA	0.02	NA	NA	0.02	NA	NA
scaffold_2	2551029	T	TC	2	25	38.6	[0, 0, 0, 25]	NA	NA	NA	NA	NA	NA	NA	NA	NA	NA	NA	0.04	NA	NA	NA	0.03	0.04	NA	NA	NA	NA	NA	NA	NA	NA	NA	NA
scaffold_2	2551030	T	TC	2	29	38.28	[0, 0, 0, 29]	NA	NA	NA	NA	NA	NA	NA	NA	NA	NA	NA	NA	NA	0.07	0.05	NA	0.03	0.03	NA	NA	NA	NA	NA	NA	NA	NA	NA
scaffold_2	2613507	T	TC	2	26	39.54	[0, 0, 0, 26]	NA	NA	NA	NA	NA	NA	NA	NA	NA	NA	NA	NA	0.05	NA	NA	0.02	0.04	NA	NA	0.04	0.03	NA	NA	NA	NA	NA	NA
scaffold_2	2737543	T	TC	2	40	39.17	[0, 0, 0, 40]	NA	NA	NA	NA	NA	NA	NA	NA	NA	NA	NA	NA	NA	NA	NA	0.03	0.03	0.02	NA	NA	NA	NA	NA	NA	NA	NA	NA
scaffold_2	2766799	G	GA	2	38	39.71	[0, 0, 38, 0]	NA	NA	NA	NA	NA	NA	NA	NA	NA	NA	NA	NA	NA	NA	NA	0.03	0.03	0.04	0.05	0.05	0.03	NA	NA	NA	NA	NA	NA
scaffold_2	2821627	T	TC	2	26	39.69	[0, 0, 0, 26]	NA	NA	NA	NA	NA	NA	NA	NA	NA	NA	NA	NA	NA	NA	NA	NA	NA	0.02	0.03	NA	NA	NA	NA	NA	0.03	0.02	0.03
scaffold_2	2978592	A	AG	2	10	40.2	[10, 0, 0, 0]	NA	NA	NA	NA	NA	NA	NA	NA	NA	NA	0.12	0.2	NA	0.12	NA	NA	NA	NA	NA	NA	NA	NA	NA	NA	NA	NA	NA
scaffold_2	3148084	A	AC	2	16	38.19	[16, 0, 0, 0]	NA	NA	NA	NA	NA	NA	NA	NA	NA	0.03	0.02	0.02	0.02	0.02	0.02	0.01	0.01	NA	0.03	0.02	0.03	NA	NA	NA	NA	NA	NA
scaffold_2	3292332	G	GA	2	36	39.08	[0, 0, 36, 0]	NA	NA	NA	NA	NA	NA	NA	NA	NA	NA	0.05	NA	NA	0.05	NA	NA	NA	NA	NA	NA	NA	NA	0.04	0.05	NA	NA	NA
scaffold_2	3382372	T	TC	2	25	39.92	[0, 0, 0, 25]	NA	NA	NA	NA	NA	NA	NA	NA	NA	NA	0.02	0.02	0.02	0.02	NA	NA	0.04	0.03	0.02	0.02	0.02	NA	NA	NA	NA	NA	NA
scaffold_2	3479660	T	TC	2	29	37.66	[0, 0, 0, 29]	NA	NA	NA	0.1	NA	0.03	0.03	NA	NA	NA	0.01	NA	NA	NA	0.01	NA	NA	NA	NA	NA	NA	NA	0.05	NA	NA	NA	NA
scaffold_2	3479677	T	TC	2	28	38.61	[0, 0, 0, 28]	NA	NA	NA	NA	NA	NA	NA	NA	NA	NA	NA	NA	NA	NA	NA	NA	0.04	0.03	NA	NA	NA	NA	NA	NA	NA	NA	NA
scaffold_2	3710952	C	CT	2	36	40.17	[0, 36, 0, 0]	NA	NA	NA	NA	NA	NA	NA	NA	NA	0.05	NA	0.05	NA	NA	NA	NA	NA	NA	NA	NA	0.05	NA	NA	NA	NA	NA	NA
scaffold_2	562189	T	TC	2	35	39.66	[0, 0, 0, 35]	NA	NA	NA	NA	NA	NA	NA	NA	NA	NA	NA	NA	NA	NA	NA	NA	NA	NA	NA	0.07	0.04	NA	NA	NA	NA	NA	0.02
scaffold_2	748491	T	TC	2	28	39.79	[0, 0, 0, 28]	NA	0.03	NA	NA	NA	NA	NA	NA	NA	NA	NA	NA	NA	NA	NA	0.03	NA	0.03	NA	NA	NA	NA	NA	NA	NA	NA	NA
scaffold_3	1144601	T	TC	2	25	39.12	[0, 0, 0, 25]	NA	NA	NA	NA	NA	NA	NA	NA	NA	NA	NA	NA	NA	NA	NA	0.03	0.03	NA	NA	NA	NA	NA	NA	0.01	0.02	0.02	NA
scaffold_3	1149605	T	TC	2	32	39.38	[0, 0, 0, 32]	NA	0.09	0.04	NA	NA	NA	NA	NA	NA	NA	NA	NA	NA	NA	NA	0.07	NA	NA	NA	NA	NA	NA	NA	NA	NA	NA	NA
scaffold_3	1168764	A	AG	2	27	40.33	[27, 0, 0, 0]	NA	NA	NA	NA	NA	NA	NA	NA	NA	NA	NA	NA	NA	NA	NA	0.04	0.04	0.04	NA	NA	NA	NA	NA	NA	NA	NA	NA
scaffold_3	1206135	T	TC	2	18	39.78	[0, 0, 0, 18]	NA	NA	NA	NA	NA	NA	NA	NA	NA	NA	NA	NA	NA	NA	NA	0.03	0.03	NA	NA	NA	NA	NA	NA	NA	NA	NA	NA
scaffold_3	1295982	C	CT	2	26	40.35	[0, 26, 0, 0]	NA	NA	NA	NA	NA	NA	NA	NA	NA	NA	NA	NA	NA	NA	NA	NA	NA	NA	0.03	0.04	0.04	NA	0.03	NA	NA	NA	NA
scaffold_3	1849034	T	TC	2	23	37.91	[0, 0, 0, 23]	0.05	0.04	NA	NA	NA	NA	0.02	NA	NA	0.05	NA	NA	0.02	NA	0.02	0.02	0.02	NA	NA	NA	NA	NA	0.03	0.04	NA	NA	NA
scaffold_3	1849068	T	TC	2	21	39.57	[0, 0, 0, 21]	NA	0.17	NA	NA	NA	NA	NA	0.13	NA	0.12	NA	NA	NA	NA	NA	0.12	0.11	0.1	NA	NA	NA	NA	NA	NA	NA	NA	NA
scaffold_3	1975405	G	GC	2	24	40.5	[0, 0, 24, 0]	NA	NA	NA	NA	NA	NA	NA	NA	NA	NA	NA	NA	NA	NA	NA	NA	NA	NA	NA	NA	NA	NA	NA	NA	0.07	NA	0.09
scaffold_3	2385155	A	AG	2	23	38.96	[23, 0, 0, 0]	NA	0.07	NA	NA	NA	NA	NA	NA	NA	NA	0.03	NA	NA	NA	0.04	0.07	NA	NA	NA	NA	NA	0.08	NA	0.05	NA	NA	NA
scaffold_3	2429081	T	TC	2	39	40	[0, 0, 0, 39]	NA	NA	NA	NA	NA	NA	NA	NA	NA	NA	NA	NA	0.02	NA	NA	0.03	0.04	NA	0.04	NA	NA	NA	NA	NA	NA	NA	NA
scaffold_3	3296081	A	AG	2	30	37.57	[30, 0, 0, 0]	NA	NA	NA	NA	NA	NA	NA	NA	NA	NA	0.04	0.03	NA	NA	NA	0.08	0.06	NA	NA	0.03	NA	NA	NA	NA	NA	NA	NA
scaffold_3	3441815	T	TC	2	28	39.96	[0, 0, 0, 28]	NA	NA	NA	NA	NA	NA	NA	NA	NA	NA	NA	NA	0.03	0.03	NA	0.02	0.03	0.03	NA	NA	NA	0.01	NA	0.02	NA	0.02	0.01
scaffold_3	353802	T	TC	2	21	38.05	[0, 0, 0, 21]	NA	NA	NA	NA	NA	NA	NA	NA	NA	NA	NA	NA	NA	NA	NA	NA	NA	NA	NA	0.04	0.05	NA	NA	NA	NA	NA	NA
scaffold_3	3634204	T	TC	2	26	38.04	[0, 0, 0, 26]	NA	NA	NA	NA	NA	NA	NA	NA	NA	NA	NA	NA	NA	NA	NA	0.06	0.09	NA	NA	NA	NA	NA	NA	NA	NA	NA	NA
scaffold_3	3654547	T	TC	2	24	39.17	[0, 0, 0, 24]	NA	NA	NA	NA	NA	NA	NA	NA	NA	NA	NA	NA	NA	NA	NA	NA	0.14	0.17	NA	NA	NA	NA	NA	NA	NA	NA	NA
scaffold_3	389669	T	TC	2	23	39	[0, 0, 0, 23]	NA	NA	NA	NA	NA	NA	NA	NA	NA	NA	NA	NA	NA	NA	NA	0.15	NA	0.5	NA	NA	NA	NA	NA	NA	NA	NA	NA
scaffold_3	440835	T	TC	2	23	39.91	[0, 0, 0, 23]	NA	NA	NA	NA	NA	NA	NA	NA	NA	NA	0.1	NA	0.05	NA	NA	0.09	0.09	0.03	0.08	NA	NA	NA	NA	NA	NA	NA	NA
scaffold_3	774254	T	TC	2	21	39.81	[0, 0, 0, 21]	NA	NA	NA	NA	NA	NA	NA	NA	NA	NA	NA	NA	NA	NA	NA	0.11	0.12	NA	NA	NA	NA	NA	NA	NA	NA	NA	NA
scaffold_3	819613	C	CG	2	24	39	[0, 24, 0, 0]	NA	NA	NA	NA	NA	NA	NA	NA	NA	NA	0.03	0.03	NA	0.06	NA	NA	NA	NA	NA	NA	0.05	NA	NA	NA	NA	NA	NA
scaffold_4	1123601	T	TC	2	30	40.3	[0, 0, 0, 30]	NA	NA	NA	NA	NA	NA	NA	NA	NA	NA	NA	NA	NA	NA	NA	0.05	0.03	NA	NA	NA	NA	NA	NA	NA	NA	NA	NA
scaffold_4	1256755	T	TG	2	18	39.11	[0, 0, 0, 18]	NA	NA	NA	NA	NA	NA	NA	NA	NA	NA	NA	NA	NA	0.05	0.04	NA	NA	NA	NA	NA	0.04	NA	NA	NA	NA	NA	NA
scaffold_4	1395013	T	TC	2	29	39.21	[0, 0, 0, 29]	NA	NA	NA	NA	NA	NA	NA	NA	NA	NA	NA	NA	NA	NA	NA	0.04	0.04	0.06	NA	NA	NA	NA	NA	NA	NA	NA	NA
scaffold_4	150194	T	TA	2	29	39.79	[0, 0, 0, 29]	NA	0.47	0.3	NA	NA	NA	NA	NA	NA	NA	NA	NA	NA	NA	NA	NA	NA	NA	NA	NA	NA	NA	NA	NA	NA	NA	NA
scaffold_4	1538257	T	TC	2	28	39.11	[0, 0, 0, 28]	NA	NA	NA	NA	NA	NA	NA	NA	NA	NA	NA	NA	NA	NA	NA	NA	0.03	0.04	NA	NA	NA	NA	NA	NA	NA	NA	NA
scaffold_4	1700924	A	AG	2	32	39.56	[32, 0, 0, 0]	NA	NA	NA	NA	NA	NA	NA	NA	NA	NA	NA	NA	0.02	0.03	0.03	0.05	0.03	0.02	NA	NA	NA	0.02	NA	NA	NA	NA	0.05
scaffold_4	1791420	T	TC	2	28	40.29	[0, 0, 0, 28]	NA	NA	NA	NA	NA	NA	NA	NA	NA	NA	NA	NA	NA	NA	NA	NA	NA	NA	NA	NA	NA	NA	NA	NA	NA	0.07	0.07
scaffold_4	1839392	G	GT	2	32	39.44	[0, 0, 32, 0]	NA	NA	NA	NA	NA	NA	NA	NA	NA	NA	NA	NA	NA	NA	NA	0.05	0.05	0.06	NA	NA	NA	NA	NA	NA	NA	NA	NA
scaffold_4	1979942	G	GA	2	24	40.12	[0, 0, 24, 0]	NA	NA	NA	NA	NA	NA	NA	NA	NA	NA	NA	0.03	NA	NA	NA	NA	NA	NA	NA	NA	NA	NA	NA	NA	0.08	0.06	0.05
scaffold_4	1979944	G	GA	2	26	38.92	[0, 0, 26, 0]	NA	NA	NA	NA	NA	NA	NA	NA	NA	NA	NA	0.03	NA	NA	NA	NA	NA	NA	NA	NA	NA	NA	NA	NA	0.1	0.06	0.05
scaffold_4	1979947	G	GA	2	27	38.44	[0, 0, 27, 0]	NA	NA	NA	NA	NA	NA	NA	NA	NA	NA	NA	NA	NA	NA	NA	NA	NA	NA	NA	NA	NA	NA	NA	NA	0.06	0.06	0.05
scaffold_4	2176035	T	TC	2	30	39.1	[0, 0, 0, 30]	NA	NA	NA	NA	NA	NA	0.02	NA	NA	NA	NA	0.02	NA	0.01	0.01	0.02	0.04	0.04	NA	0.01	NA	NA	NA	0.01	NA	NA	NA
scaffold_4	2176038	T	TC	2	31	39	[0, 0, 0, 31]	NA	NA	NA	NA	0.21	0.1	0.03	0.1	NA	0.02	0.03	0.02	0.03	0.03	0.02	0.03	0.04	0.04	0.01	0.04	0.02	NA	0.02	0.03	0.03	0.03	NA
scaffold_4	23224	A	AG	2	25	39.56	[25, 0, 0, 0]	NA	NA	NA	NA	NA	NA	NA	NA	NA	NA	0.05	NA	0.05	NA	NA	NA	NA	NA	NA	0.1	0.07	NA	NA	NA	NA	NA	NA
scaffold_4	234714	T	TC	2	29	38.72	[0, 0, 0, 29]	NA	NA	NA	NA	0.11	NA	0.04	0.03	NA	NA	NA	0.03	0.02	NA	0.01	0.02	0.02	0.01	NA	NA	NA	NA	0.01	0.01	NA	0.01	NA
scaffold_4	245909	T	TC	2	27	39.22	[0, 0, 0, 27]	NA	NA	NA	NA	NA	NA	NA	NA	NA	NA	0.11	NA	0.11	NA	NA	0.08	0.11	0.1	NA	NA	NA	NA	NA	NA	NA	NA	NA
scaffold_4	2463801	T	TC	2	24	39.83	[0, 0, 0, 24]	NA	NA	NA	NA	NA	NA	0.02	0.02	NA	NA	NA	NA	NA	NA	NA	0.04	0.05	NA	NA	NA	NA	NA	NA	NA	NA	NA	NA
scaffold_4	2543396	T	TC	2	37	39.03	[0, 0, 0, 37]	NA	0.04	NA	NA	0.07	0.04	NA	NA	NA	NA	0.02	0.03	NA	NA	NA	0.03	NA	NA	NA	NA	NA	NA	0.01	NA	NA	NA	NA
scaffold_4	2703692	T	TC	2	26	39.85	[0, 0, 0, 26]	NA	NA	NA	NA	NA	NA	NA	NA	NA	NA	NA	NA	NA	0.03	NA	0.06	NA	0.05	NA	NA	NA	0.05	0.09	NA	NA	NA	NA
scaffold_4	2987588	T	TC	2	43	39.74	[0, 0, 0, 43]	NA	NA	NA	NA	NA	NA	NA	NA	NA	NA	NA	NA	NA	NA	NA	NA	NA	0.05	NA	NA	NA	NA	NA	NA	0.03	NA	0.03
scaffold_4	3293778	T	TC	2	30	39.57	[0, 0, 0, 30]	NA	NA	NA	NA	NA	NA	NA	NA	NA	NA	NA	NA	NA	NA	NA	0.06	NA	NA	NA	NA	NA	0.03	0.03	0.03	0.03	0.04	NA
scaffold_4	333285	G	GC	2	33	39.42	[0, 0, 33, 0]	NA	NA	NA	NA	NA	NA	NA	NA	NA	NA	NA	NA	0.05	NA	0.04	NA	NA	NA	NA	NA	NA	NA	NA	NA	NA	NA	NA
scaffold_4	3528507	T	TC	2	32	39.09	[0, 0, 0, 32]	NA	0.14	0.08	NA	NA	NA	NA	NA	NA	NA	NA	NA	NA	NA	NA	0.04	0.06	0.05	NA	NA	NA	NA	NA	NA	NA	NA	NA
scaffold_4	3679890	A	AG	2	25	38.72	[25, 0, 0, 0]	NA	NA	NA	NA	NA	NA	NA	NA	NA	NA	NA	NA	NA	NA	NA	0.05	0.03	0.03	NA	NA	NA	NA	NA	NA	NA	NA	NA
scaffold_4	460557	A	AG	2	12	41	[12, 0, 0, 0]	NA	NA	NA	NA	NA	NA	NA	NA	NA	NA	0.02	NA	NA	NA	NA	NA	0.04	0.04	NA	NA	NA	NA	NA	NA	NA	NA	NA
scaffold_4	552893	C	CG	2	28	39	[0, 28, 0, 0]	NA	NA	NA	NA	NA	NA	NA	NA	NA	NA	NA	NA	0.04	0.05	NA	NA	NA	NA	NA	NA	NA	NA	NA	NA	NA	NA	0.03
scaffold_4	552906	C	CT	2	27	38.26	[0, 27, 0, 0]	NA	NA	NA	NA	NA	NA	NA	NA	NA	NA	NA	NA	0.05	0.06	NA	NA	NA	NA	NA	NA	NA	NA	NA	NA	NA	NA	0.04
scaffold_5	1037802	T	TC	2	32	38.72	[0, 0, 0, 32]	NA	NA	NA	NA	NA	NA	NA	NA	NA	NA	NA	NA	0.23	NA	NA	0.11	0.16	NA	NA	NA	NA	NA	NA	NA	NA	NA	NA
scaffold_5	1037982	C	CT	2	22	39.41	[0, 22, 0, 0]	NA	0.01	NA	NA	NA	NA	NA	NA	NA	NA	NA	NA	NA	NA	NA	0.07	0.07	NA	NA	NA	NA	NA	NA	NA	NA	NA	NA
scaffold_5	1133937	C	CT	2	33	39.12	[0, 33, 0, 0]	0.1	NA	NA	NA	NA	NA	0.14	0.17	NA	NA	NA	NA	NA	NA	NA	NA	NA	NA	NA	NA	NA	NA	NA	NA	NA	NA	NA
scaffold_5	1136932	T	TC	2	29	38.62	[0, 0, 0, 29]	NA	NA	NA	NA	NA	NA	0.01	NA	NA	0.02	0.02	0.03	0.02	0.02	0.03	0.03	NA	NA	0.03	NA	NA	NA	NA	NA	0.04	0.03	NA
scaffold_5	1159417	G	GC	2	27	40.19	[0, 0, 27, 0]	0.09	0.04	NA	NA	NA	NA	NA	NA	NA	NA	NA	NA	NA	0.05	NA	0.03	0.07	NA	NA	NA	NA	NA	NA	NA	NA	NA	NA
scaffold_5	1287504	T	TC	2	34	39.35	[0, 0, 0, 34]	NA	NA	NA	NA	NA	NA	0.07	0.06	NA	NA	0.06	NA	0.06	NA	NA	NA	NA	0.09	NA	NA	NA	0.08	0.07	NA	NA	NA	0.16
scaffold_5	1344836	T	TC	2	31	39.13	[0, 0, 0, 31]	NA	NA	NA	NA	NA	NA	0.19	0.1	NA	NA	0.03	NA	NA	NA	NA	0.05	0.06	0.06	0.06	NA	NA	NA	NA	NA	NA	NA	NA
scaffold_5	1384591	T	TC	2	32	38.25	[0, 0, 0, 32]	NA	NA	NA	NA	NA	NA	NA	NA	NA	NA	NA	0.06	NA	0.05	NA	0.06	NA	0.03	0.07	0.05	NA	0.04	0.04	0.06	NA	NA	NA
scaffold_5	1393409	A	AG	2	25	38.88	[25, 0, 0, 0]	NA	NA	NA	NA	NA	NA	NA	NA	NA	NA	NA	NA	NA	NA	NA	0.04	NA	0.06	NA	NA	NA	NA	NA	NA	NA	NA	NA
scaffold_5	1430443	T	TG	2	33	38.94	[0, 0, 0, 33]	NA	0.93	0.92	NA	NA	NA	NA	NA	NA	NA	NA	NA	NA	NA	NA	NA	NA	NA	NA	NA	NA	NA	NA	NA	NA	NA	NA
scaffold_5	1653646	T	TA	2	24	37.75	[0, 0, 0, 24]	NA	NA	NA	NA	NA	NA	NA	NA	NA	NA	NA	NA	NA	NA	NA	0.13	0.14	0.05	NA	NA	NA	NA	NA	NA	NA	NA	NA
scaffold_5	1663250	T	TC	2	19	39.42	[0, 0, 0, 19]	0.07	NA	0.04	NA	NA	NA	NA	NA	NA	NA	NA	NA	NA	NA	NA	NA	NA	NA	NA	NA	NA	NA	NA	NA	NA	NA	NA
scaffold_5	1720733	T	TC	2	28	37.96	[0, 0, 0, 28]	0.04	0.02	0.04	0.23	0.1	NA	0.03	0.03	NA	0.03	0.03	NA	0.03	0.02	0.02	0.03	0.03	0.04	0.02	0.03	0.03	0.04	NA	NA	NA	NA	NA
scaffold_5	1736589	T	TC	2	34	40.24	[0, 0, 0, 34]	0.07	0.05	NA	NA	NA	NA	NA	NA	NA	NA	NA	NA	NA	NA	NA	0.05	0.04	0.04	NA	NA	NA	NA	NA	NA	0.05	NA	NA
scaffold_5	1922855	T	TC	2	28	39.93	[0, 0, 0, 28]	NA	NA	NA	NA	NA	NA	NA	NA	NA	0.03	0.04	NA	0.03	0.01	0.02	0.02	0.03	0.03	0.02	0.01	0.02	NA	0.07	0.07	0.03	NA	NA
scaffold_5	1922864	C	CA	2	32	40.25	[0, 32, 0, 0]	NA	NA	NA	NA	NA	NA	NA	NA	NA	NA	NA	NA	0.04	0.03	NA	NA	NA	NA	0.05	0.04	NA	NA	NA	NA	NA	NA	NA
scaffold_5	20053	T	TC	2	33	38.52	[0, 0, 0, 33]	NA	NA	NA	NA	NA	NA	NA	NA	NA	NA	NA	NA	NA	NA	NA	0.11	0.07	NA	NA	NA	NA	NA	NA	NA	NA	NA	NA
scaffold_5	2040910	T	TC	2	28	38.61	[0, 0, 0, 28]	NA	NA	NA	NA	NA	NA	NA	NA	NA	NA	0.19	NA	NA	0.18	NA	0.1	0.16	0.12	NA	NA	0.36	NA	NA	NA	NA	NA	NA
scaffold_5	213583	G	GA	2	22	39.82	[0, 0, 22, 0]	NA	NA	NA	NA	NA	NA	NA	NA	NA	NA	NA	NA	NA	0.02	NA	NA	NA	NA	NA	0.01	0.01	NA	NA	NA	0.03	NA	0.03
scaffold_5	2198880	T	TC	2	34	38.38	[0, 0, 0, 34]	NA	NA	NA	NA	NA	NA	0.04	0.07	NA	NA	NA	NA	NA	NA	NA	NA	NA	NA	NA	NA	NA	NA	NA	NA	NA	NA	NA
scaffold_5	238930	T	TA	2	19	39.47	[0, 0, 0, 19]	NA	NA	NA	NA	NA	NA	NA	NA	NA	NA	NA	NA	NA	NA	0.01	0.03	0.04	0.03	NA	NA	NA	NA	NA	NA	NA	NA	NA
scaffold_5	2392727	T	TC	2	12	40.33	[0, 0, 0, 12]	NA	NA	NA	NA	NA	NA	0.09	NA	NA	NA	0.02	NA	NA	NA	NA	0.04	NA	0.04	NA	0.04	NA	NA	NA	NA	NA	NA	NA
scaffold_5	248001	T	TC	2	22	39.05	[0, 0, 0, 22]	NA	NA	NA	NA	NA	NA	NA	NA	NA	NA	0.07	NA	NA	NA	NA	0.04	0.04	0.04	NA	NA	NA	NA	NA	NA	NA	NA	NA
scaffold_5	2758885	T	TC	2	31	36.74	[0, 0, 0, 31]	NA	0.03	0.03	NA	NA	NA	0.01	0.02	NA	0.02	NA	0.01	NA	0.01	NA	0.03	NA	0.02	0.02	0.02	0.03	0.02	0.01	0.01	NA	0.02	0.03
scaffold_5	2775536	T	TC	2	30	38.7	[0, 0, 0, 30]	NA	NA	NA	NA	NA	NA	0.04	0.04	NA	NA	NA	NA	NA	NA	NA	NA	0.07	0.11	NA	NA	NA	NA	NA	NA	NA	NA	NA
scaffold_5	3082927	T	TC	2	22	39.23	[0, 0, 0, 22]	NA	NA	NA	NA	NA	NA	0.03	0.04	NA	NA	NA	NA	NA	NA	NA	NA	0.03	0.06	NA	NA	0.06	NA	NA	NA	NA	NA	NA
scaffold_5	3098055	T	TC	2	29	40.1	[0, 0, 0, 29]	NA	NA	NA	NA	NA	NA	0.05	0.03	NA	0.05	NA	NA	NA	NA	NA	0.03	0.07	0.03	NA	0.1	NA	NA	NA	0.06	0.01	0.03	0.02
scaffold_5	3215213	T	TC	2	32	40.06	[0, 0, 0, 32]	NA	NA	NA	NA	NA	NA	NA	NA	NA	NA	NA	NA	NA	NA	NA	NA	0.03	0.03	NA	NA	NA	NA	NA	NA	NA	NA	NA
scaffold_5	3271892	A	AG	2	22	36.77	[22, 0, 0, 0]	NA	NA	NA	NA	NA	NA	NA	NA	NA	NA	NA	NA	NA	NA	NA	NA	0.05	0.06	NA	NA	NA	NA	NA	NA	NA	NA	NA
scaffold_5	3368301	T	TC	2	35	39.43	[0, 0, 0, 35]	NA	NA	NA	NA	NA	NA	NA	NA	NA	NA	NA	NA	NA	NA	NA	0.06	0.03	NA	NA	NA	NA	NA	NA	NA	NA	NA	NA
scaffold_5	681007	T	TC	2	27	36.96	[0, 0, 0, 27]	NA	0.09	NA	NA	NA	NA	NA	0.08	NA	0.07	NA	0.06	0.06	0.06	0.12	NA	0.06	NA	0.09	0.08	0.06	NA	NA	NA	NA	0.05	NA
scaffold_5	694941	A	AG	2	21	37.86	[21, 0, 0, 0]	0.03	NA	0.04	NA	0.14	NA	NA	NA	NA	0.04	0.03	0.05	0.04	0.05	0.04	0.01	0.01	0.01	0.04	0.06	0.03	0.05	0.04	0.05	0.03	0.04	0.04
scaffold_6	1127238	T	TC	2	27	39.78	[0, 0, 0, 27]	NA	NA	NA	NA	NA	NA	NA	NA	NA	0.25	NA	NA	NA	NA	NA	0.14	0.09	NA	0.18	0.17	NA	NA	NA	NA	NA	NA	NA
scaffold_6	1334690	T	TC	2	28	37.96	[0, 0, 0, 28]	1	1	1	NA	NA	1	1	1	NA	NA	0.27	0.03	NA	0.07	NA	0.08	0.02	0.03	0.11	0.04	0.78	NA	NA	NA	NA	NA	NA
scaffold_6	1337796	C	CA	2	34	39.41	[0, 34, 0, 0]	NA	NA	NA	NA	NA	NA	NA	NA	NA	0.07	0.14	NA	NA	0.1	NA	NA	NA	NA	NA	NA	NA	NA	NA	NA	NA	NA	0.18
scaffold_6	1387991	T	TC	2	24	39.38	[0, 0, 0, 24]	0.01	NA	NA	NA	0.04	0.03	NA	NA	NA	NA	NA	NA	NA	NA	NA	NA	NA	NA	NA	NA	NA	NA	NA	NA	NA	NA	NA
scaffold_6	1474161	G	GT	2	29	40.28	[0, 0, 29, 0]	NA	NA	NA	NA	NA	NA	NA	NA	NA	NA	NA	NA	NA	NA	NA	0.03	0.03	0.03	NA	NA	NA	NA	NA	NA	NA	NA	NA
scaffold_6	1726204	T	TC	2	27	39.85	[0, 0, 0, 27]	NA	NA	NA	NA	NA	NA	NA	NA	NA	NA	NA	NA	NA	NA	NA	NA	0.03	0.03	NA	NA	NA	NA	NA	NA	NA	NA	NA
scaffold_6	1791511	T	TC	2	29	39.1	[0, 0, 0, 29]	NA	NA	NA	NA	NA	NA	NA	NA	NA	NA	NA	NA	NA	NA	NA	0.03	0.03	NA	NA	NA	0.02	NA	NA	NA	NA	NA	NA
scaffold_6	2119980	C	CT	2	28	39.43	[0, 28, 0, 0]	NA	NA	NA	NA	NA	NA	0.08	0.04	NA	NA	NA	NA	NA	NA	NA	NA	0.06	NA	0.07	NA	NA	NA	NA	NA	NA	NA	NA
scaffold_6	2283059	T	TC	2	24	39.75	[0, 0, 0, 24]	NA	NA	NA	NA	NA	NA	NA	NA	NA	NA	NA	NA	NA	NA	NA	0.03	0.03	0.05	NA	NA	NA	NA	NA	NA	NA	NA	NA
scaffold_6	2508433	T	TC	2	30	38.83	[0, 0, 0, 30]	NA	0.06	NA	NA	NA	NA	NA	NA	NA	NA	NA	NA	NA	0.04	NA	NA	NA	NA	NA	0.06	NA	0.03	0.03	0.03	0.03	0.04	NA
scaffold_6	2657017	T	TC	2	34	38.53	[0, 0, 0, 34]	NA	NA	NA	NA	NA	NA	NA	NA	NA	NA	NA	NA	NA	NA	NA	0.09	0.03	0.06	0.02	0.04	0.02	NA	NA	NA	NA	NA	NA
scaffold_6	411429	A	AG	2	31	39.48	[31, 0, 0, 0]	NA	NA	NA	NA	NA	NA	NA	NA	NA	NA	NA	NA	NA	NA	NA	0.07	NA	0.08	NA	NA	NA	NA	NA	NA	NA	NA	NA
scaffold_6	584885	T	TC	2	19	37.58	[0, 0, 0, 19]	NA	NA	NA	NA	NA	NA	NA	NA	NA	0.02	NA	0.02	NA	NA	0.02	NA	NA	NA	0.03	0.03	0.01	NA	NA	NA	0.04	NA	0.02
scaffold_6	658469	T	TC	2	20	39.45	[0, 0, 0, 20]	0.04	NA	NA	NA	NA	NA	0.02	0.02	NA	NA	NA	NA	NA	NA	NA	0.07	0.03	0.03	NA	NA	NA	NA	NA	NA	NA	NA	NA
scaffold_6	838721	T	TC	2	32	39.59	[0, 0, 0, 32]	NA	NA	NA	NA	NA	NA	NA	NA	NA	NA	NA	NA	NA	NA	NA	0.13	0.18	0.16	NA	NA	NA	NA	NA	NA	NA	NA	NA
scaffold_6	881758	T	TC	2	29	39.14	[0, 0, 0, 29]	NA	NA	NA	NA	NA	NA	NA	NA	NA	NA	NA	NA	NA	NA	NA	0.07	0.08	NA	NA	NA	NA	NA	NA	NA	NA	NA	NA
scaffold_7	1368789	A	AG	2	30	39.2	[30, 0, 0, 0]	NA	NA	NA	NA	0.1	0.05	NA	NA	NA	0.08	NA	NA	0.04	0.02	0.04	0.06	0.04	0.04	0.05	0.1	NA	NA	NA	NA	NA	NA	NA
scaffold_7	1880248	T	TC	2	23	39.74	[0, 0, 0, 23]	NA	NA	NA	NA	NA	NA	NA	NA	NA	NA	NA	NA	NA	NA	NA	NA	NA	NA	0.03	0.03	0.02	NA	NA	NA	NA	NA	NA
scaffold_7	2286837	T	TC	2	10	36.2	[0, 0, 0, 10]	0.05	NA	0.05	NA	NA	NA	NA	NA	NA	NA	NA	NA	NA	NA	NA	NA	NA	NA	NA	NA	NA	NA	NA	NA	NA	NA	NA
scaffold_7	2420293	A	AC	2	27	38.81	[27, 0, 0, 0]	NA	NA	NA	NA	NA	NA	NA	NA	NA	NA	NA	NA	NA	NA	NA	NA	0.16	0.07	NA	NA	NA	NA	NA	NA	NA	NA	NA
scaffold_7	2421854	T	TC	2	33	39.39	[0, 0, 0, 33]	NA	NA	NA	NA	NA	NA	NA	NA	NA	NA	NA	NA	NA	NA	NA	NA	0.04	0.06	NA	NA	NA	NA	NA	NA	NA	NA	NA
scaffold_7	543630	T	TC	2	20	39.45	[0, 0, 0, 20]	NA	NA	NA	NA	NA	NA	NA	NA	NA	NA	NA	NA	NA	NA	NA	0.08	0.07	NA	NA	NA	NA	NA	NA	NA	NA	NA	NA
scaffold_7	656275	G	GC	2	31	38.61	[0, 0, 31, 0]	0.25	0.14	NA	NA	NA	NA	NA	NA	NA	NA	NA	NA	NA	NA	NA	NA	NA	NA	NA	NA	NA	NA	NA	NA	NA	NA	NA
scaffold_8	1107144	T	TC	2	30	39.9	[0, 0, 0, 30]	NA	NA	NA	NA	NA	NA	NA	NA	NA	NA	NA	NA	NA	NA	NA	0.04	NA	0.03	NA	NA	NA	NA	NA	NA	NA	NA	NA
scaffold_8	1232115	C	CT	2	26	39.85	[0, 26, 0, 0]	NA	NA	NA	NA	NA	NA	NA	NA	NA	0.06	0.05	0.07	NA	0.05	0.05	NA	0.1	0.07	NA	NA	NA	0.11	0.06	0.06	NA	0.05	NA
scaffold_8	1590779	T	TC	2	29	39.55	[0, 0, 0, 29]	NA	NA	NA	NA	NA	NA	NA	NA	NA	NA	NA	NA	NA	NA	NA	0.05	0.06	0.05	NA	NA	NA	NA	NA	NA	NA	NA	NA
scaffold_8	1609296	T	TC	2	34	39.24	[0, 0, 0, 34]	NA	NA	NA	NA	NA	NA	NA	NA	NA	NA	NA	NA	NA	NA	NA	0.04	0.08	0.06	NA	NA	0.04	NA	NA	NA	NA	NA	NA
scaffold_8	1659415	T	TC	2	22	40.45	[0, 0, 0, 22]	0.03	0.03	0.06	NA	NA	NA	NA	NA	NA	NA	NA	NA	NA	NA	NA	0.06	NA	0.04	0.11	NA	NA	NA	NA	NA	NA	NA	NA
scaffold_8	2059304	A	AT	2	34	39.76	[34, 0, 0, 0]	0.02	0.04	0.03	NA	NA	NA	NA	NA	NA	NA	NA	NA	NA	NA	NA	NA	NA	NA	NA	NA	NA	NA	NA	NA	NA	NA	NA
scaffold_8	2061571	T	TC	2	22	38.23	[0, 0, 0, 22]	NA	NA	NA	NA	NA	NA	NA	NA	NA	NA	NA	NA	0.06	NA	NA	0.03	0.05	0.05	NA	NA	NA	NA	NA	NA	NA	NA	NA
scaffold_8	2141405	T	TC	2	27	39.89	[0, 0, 0, 27]	0.04	NA	NA	NA	NA	NA	NA	NA	NA	NA	NA	NA	NA	NA	NA	0.04	0.07	0.07	NA	NA	NA	NA	NA	NA	NA	NA	NA
scaffold_8	285907	T	TC	2	24	36.88	[0, 0, 0, 24]	NA	0.05	0.03	NA	NA	NA	NA	0.02	NA	NA	0.02	0.03	NA	0.03	0.02	NA	0.03	NA	NA	NA	NA	NA	0.03	NA	NA	NA	NA
scaffold_8	453813	T	TC	2	15	38.13	[0, 0, 0, 15]	NA	NA	NA	NA	NA	NA	NA	NA	NA	NA	NA	NA	NA	NA	NA	NA	0.04	0.05	NA	NA	NA	NA	NA	NA	NA	NA	NA
scaffold_8	466588	A	AG	2	28	40.07	[28, 0, 0, 0]	NA	NA	NA	NA	NA	NA	NA	NA	NA	NA	NA	NA	NA	NA	NA	0.04	0.02	0.06	NA	NA	NA	NA	NA	NA	NA	NA	NA
scaffold_8	467373	G	GC	2	26	39.96	[0, 0, 26, 0]	NA	NA	NA	NA	NA	NA	NA	NA	NA	NA	NA	0.25	NA	NA	NA	NA	NA	NA	NA	0.11	0.2	NA	NA	NA	NA	NA	NA
scaffold_8	516668	A	AG	2	35	39.66	[35, 0, 0, 0]	NA	NA	NA	NA	NA	NA	NA	NA	NA	NA	NA	NA	NA	NA	NA	0.02	0.03	0.04	NA	NA	NA	NA	NA	NA	NA	NA	NA
scaffold_8	540429	T	TC	2	39	39.36	[0, 0, 0, 39]	NA	NA	NA	NA	0.08	0.05	NA	NA	NA	NA	NA	NA	NA	NA	NA	NA	NA	NA	NA	NA	NA	NA	NA	NA	NA	NA	NA
scaffold_8	577991	T	TC	2	31	38.58	[0, 0, 0, 31]	NA	NA	NA	NA	NA	NA	NA	NA	NA	NA	NA	0.11	NA	NA	NA	0.06	0.09	0.06	NA	0.05	0.07	NA	NA	NA	NA	NA	NA
scaffold_8	888669	T	TC	2	26	39.62	[0, 0, 0, 26]	NA	NA	NA	NA	NA	NA	NA	NA	NA	NA	NA	NA	NA	NA	NA	0.04	0.05	NA	NA	NA	NA	NA	NA	NA	NA	NA	NA
scaffold_8	910060	T	TC	2	36	39.58	[0, 0, 0, 36]	0.07	NA	NA	NA	NA	NA	0.06	0.05	NA	0.03	0.02	NA	0.02	0.03	NA	0.05	0.05	0.06	0.04	0.03	0.03	0.03	NA	0.03	0.03	0.05	0.02
scaffold_8	991801	T	TC	2	47	39.79	[0, 0, 0, 47]	NA	NA	NA	NA	NA	NA	NA	NA	NA	NA	NA	NA	NA	NA	NA	0.02	0.04	0.03	NA	NA	NA	NA	NA	NA	NA	NA	NA
scaffold_9	1082646	T	TC	2	30	38.83	[0, 0, 0, 30]	0.02	NA	NA	NA	NA	NA	NA	NA	NA	NA	NA	NA	NA	NA	NA	0.03	0.03	0.02	NA	NA	NA	NA	NA	NA	NA	NA	NA
scaffold_9	1082652	T	TC	2	28	39.57	[0, 0, 0, 28]	0.02	0.02	0.02	NA	NA	NA	NA	NA	NA	NA	NA	NA	NA	NA	NA	0.04	0.02	0.04	NA	0.07	NA	NA	NA	NA	NA	NA	NA
scaffold_9	1276926	T	TC	2	22	40	[0, 0, 0, 22]	NA	NA	NA	NA	NA	NA	NA	NA	NA	NA	NA	NA	NA	NA	NA	NA	0.04	0.07	NA	NA	NA	NA	NA	NA	NA	NA	NA
scaffold_9	1276928	T	TC	2	24	37.96	[0, 0, 0, 24]	NA	NA	NA	NA	NA	NA	NA	NA	NA	NA	NA	NA	NA	NA	NA	0.04	0.03	NA	NA	NA	NA	NA	NA	NA	NA	NA	NA
scaffold_9	1352057	A	AG	2	19	39.58	[19, 0, 0, 0]	NA	NA	NA	NA	NA	NA	NA	NA	NA	NA	NA	NA	NA	NA	NA	NA	0.05	0.04	NA	NA	NA	NA	NA	NA	NA	NA	NA
scaffold_9	1427908	A	AT	2	24	39.46	[24, 0, 0, 0]	NA	NA	NA	NA	NA	NA	NA	NA	NA	NA	NA	NA	NA	NA	NA	0.03	NA	0.03	NA	NA	NA	NA	NA	0.01	NA	NA	NA
scaffold_9	1538978	C	CT	2	16	38.81	[0, 16, 0, 0]	NA	NA	NA	NA	NA	NA	NA	NA	NA	0.03	NA	0.05	NA	0.03	NA	0.03	NA	0.02	NA	NA	NA	NA	NA	NA	NA	NA	NA
scaffold_9	1901616	T	TC	2	28	39.79	[0, 0, 0, 28]	NA	NA	NA	NA	NA	NA	0.04	NA	NA	NA	NA	NA	NA	NA	NA	0.09	0.06	0.05	NA	NA	NA	NA	NA	NA	NA	NA	NA
scaffold_9	249171	T	TA	2	12	38.75	[0, 0, 0, 12]	NA	NA	NA	NA	NA	NA	NA	NA	NA	NA	NA	NA	NA	NA	NA	0.03	0.03	0.01	NA	NA	NA	NA	NA	NA	NA	NA	NA
scaffold_9	249205	C	CT	2	12	40	[0, 12, 0, 0]	NA	NA	NA	NA	NA	NA	NA	NA	NA	NA	NA	NA	NA	NA	NA	0.03	0.04	0.02	NA	NA	NA	NA	NA	NA	NA	NA	NA
scaffold_9	249245	T	TC	2	19	39.63	[0, 0, 0, 19]	NA	NA	NA	NA	NA	NA	NA	NA	NA	NA	NA	NA	NA	NA	NA	0.06	0.04	0.02	NA	NA	NA	NA	NA	NA	NA	NA	NA
scaffold_9	445868	G	GA	2	27	39.67	[0, 0, 27, 0]	NA	NA	NA	NA	NA	NA	NA	NA	NA	0.05	0.05	NA	0.02	0.02	0.03	0.06	NA	0.02	NA	NA	0.03	NA	NA	NA	NA	NA	NA
scaffold_9	714012	T	TC	2	30	39.03	[0, 0, 0, 30]	NA	NA	NA	NA	NA	NA	NA	NA	NA	0.04	0.03	NA	0.02	0.02	0.04	NA	NA	NA	NA	NA	0.07	0.03	0.03	0.04	NA	NA	NA
scaffold_9	714024	A	AC	2	31	38.55	[31, 0, 0, 0]	NA	NA	NA	NA	NA	NA	NA	NA	NA	0.07	0.02	NA	0.03	NA	0.03	NA	NA	NA	0.03	NA	NA	0.03	0.02	0.03	NA	NA	NA
scaffold_9	715850	T	TC	2	21	38.86	[0, 0, 0, 21]	NA	NA	0.11	NA	NA	NA	0.04	0.07	NA	0.08	0.09	0.1	0.12	0.14	0.19	NA	0.05	0.1	0.17	0.08	NA	0.03	0.03	0.04	0.04	0.04	NA
scaffold_9	849019	T	TC	2	38	40.76	[0, 0, 0, 38]	NA	0.07	0.04	NA	NA	NA	NA	NA	NA	NA	NA	NA	NA	NA	NA	0.05	0.03	0.07	NA	NA	NA	NA	NA	0.16	NA	NA	NA
scaffold_9	898670	T	TC	2	26	38.88	[0, 0, 0, 26]	NA	NA	NA	NA	NA	NA	0.1	0.1	NA	NA	NA	NA	NA	NA	NA	0.05	0.06	0.04	NA	0.06	0.09	NA	NA	NA	0.06	NA	0.1
