# Supplementary material for: The Genome-Wide Characterization of Alternative Splicing and RNA Editing in the Development of Coprinopsis cinerea
Source: J Fungi (Basel). 2023 Sep 9;9(9):915. doi: 10.3390/jof9090915 (PMC10532568; doi:10.3390/jof9090915)
Supplement: Supplementary file 1 [file jof-09-00915-s001.zip › DatasetS5_RNA_editing.feature.xlsx]

## Sheet: Sheet1
Transcript	Region	Position	Impact	Effect	Genes	Exon	cds.change	cDNA.position	cds.position	aa.change	aa.position	Distance	Gene.region	Genename
CC2G_000018-T1	scaffold_1	46772	3_prime_UTR_variant	MODIFIER	CC2G_000018	10/10	c.*297T>C					297	3'-UTR	malate dehydrogenase
CC2G_000021-T1	scaffold_1	58651	3_prime_UTR_variant	MODIFIER	CC2G_000021	13/13	c.*119T>C					119	3'-UTR	peptide transporter PTR2B
CC2G_000065-T1	scaffold_1	166675	upstream_gene_variant	MODIFIER	CC2G_000065		c.-4102A>G					4102	Intergenic	hypothetical protein
CC2G_000068-T1	scaffold_1	167882	3_prime_UTR_variant	MODIFIER	CC2G_000068	3/3	c.*232T>C					232	3'-UTR	hypothetical protein
CC2G_000068-T1	scaffold_1	167847	3_prime_UTR_variant	MODIFIER	CC2G_000068	3/3	c.*197T>C					197	3'-UTR	hypothetical protein
CC2G_000089-T1	scaffold_1	216590	upstream_gene_variant	MODIFIER	CC2G_000089		c.-3108A>G					3108	Intergenic	hypothetical protein
CC2G_000090-T1	scaffold_1	216583	3_prime_UTR_variant	MODIFIER	CC2G_000090	7/7	c.*270T>C					270	3'-UTR	histone H3
CC2G_000122-T1	scaffold_1	301748	synonymous_variant	LOW	CC2G_000122	4/5	c.4164G>T	4813/6206	4164/4191	p.Gly1388Gly	1388/1396		CDS	protein phosphatase regulator
CC2G_000204-T1	scaffold_1	500517	missense_variant	MODERATE	CC2G_000204	9/9	c.1253T>C	1253/2045	1253/1632	p.Val418Ala	418/543		CDS	hypothetical protein
CC2G_000303-T1	scaffold_1	775044	upstream_gene_variant	MODIFIER	CC2G_000303		c.-1182A>G					1068	Intergenic	60S ribosomal protein L21
CC2G_000327-T1	scaffold_1	842371	upstream_gene_variant	MODIFIER	CC2G_000327		c.-3991A>G					3991	Intergenic	hypothetical protein
CC2G_000345-T1	scaffold_1	877131	upstream_gene_variant	MODIFIER	CC2G_000345		c.-249T>C					249	Intergenic	mannosyl-oligosaccharide 1,2-alpha-mannosidase
CC2G_000423-T1	scaffold_1	1061898	upstream_gene_variant	MODIFIER	CC2G_000423		c.-185T>C					176	Intergenic	tRNA-dihydrouridine synthase 2
CC2G_000524-T1	scaffold_1	1303571	upstream_gene_variant	MODIFIER	CC2G_000524		c.-3394A>G					3394	Intergenic	chitin synthase
CC2G_000625-T1	scaffold_1	1525684	3_prime_UTR_variant	MODIFIER	CC2G_000625	3/3	c.*461A>G					461	3'-UTR	hypothetical protein
CC2G_000642-T1	scaffold_1	1567564	upstream_gene_variant	MODIFIER	CC2G_000642		c.-2643A>G					2394	Intergenic	hypothetical protein
CC2G_000695-T1	scaffold_1	1680797	synonymous_variant	LOW	CC2G_000695	11/13	c.1815T>C	1913/3056	1815/2958	p.Ser605Ser	605/985		CDS	hypothetical protein
CC2G_000730-T1	scaffold_1	1759357	upstream_gene_variant	MODIFIER	CC2G_000730		c.-4715A>G					4715	Intergenic	hypothetical protein
CC2G_000753-T1	scaffold_1	1817744	missense_variant	MODERATE	CC2G_000753	3/3	c.1288A>G	1288/1296	1288/1296	p.Ser430Gly	430/431		CDS	glucosylceramide synthase
CC2G_000768-T1	scaffold_1	1849871	upstream_gene_variant	MODIFIER	CC2G_000768		c.-4146A>G					4123	Intergenic	aldehyde dehydrogenase
CC2G_000875-T1	scaffold_1	2116854	stop_gained	HIGH	CC2G_000875	6/8	c.1731C>G	1731/2142	1731/2142	p.Tyr577*	577/713		CDS	Trp-Asp repeats containing protein
CC2G_000917-T1	scaffold_1	2215722	upstream_gene_variant	MODIFIER	CC2G_000917		c.-2694A>G					2640	Intergenic	hypothetical protein
CC2G_001043-T1	scaffold_1	2486558	upstream_gene_variant	MODIFIER	CC2G_001043		c.-201T>C					201	Intergenic	hypothetical protein
CC2G_001060-T1	scaffold_1	2525162	upstream_gene_variant	MODIFIER	CC2G_001060		c.-4450A>G					4450	Intergenic	hypothetical protein
CC2G_001061-T1	scaffold_1	2522858	5_prime_UTR_variant	MODIFIER	CC2G_001061	2/6	c.-84G>A					84	5'-UTR	hypothetical protein
CC2G_001096-T1	scaffold_1	2583145	3_prime_UTR_variant	MODIFIER	CC2G_001096	6/6	c.*124T>C					124	3'-UTR	60S ribosomal protein L32
CC2G_001106-T1	scaffold_1	2599148	3_prime_UTR_variant	MODIFIER	CC2G_001106	4/4	c.*102T>C					102	3'-UTR	40S ribosomal protein S3
CC2G_001196-T1	scaffold_1	2801077	upstream_gene_variant	MODIFIER	CC2G_001196		c.-3629A>G					3629	Intergenic	60S ribosomal protein L13
CC2G_001198-T1	scaffold_1	2803897	3_prime_UTR_variant	MODIFIER	CC2G_001198	2/2	c.*80T>C					80	3'-UTR	hypothetical protein
CC2G_001204-T1	scaffold_1	2814918	3_prime_UTR_variant	MODIFIER	CC2G_001204	7/7	c.*257T>C					313	3'-UTR	NADPH oxidase isoform 1
CC2G_001214-T1	scaffold_1	2848268	upstream_gene_variant	MODIFIER	CC2G_001214		c.-4700A>G					4494	Intergenic	hypothetical protein
CC2G_001231-T1	scaffold_1	2876801	upstream_gene_variant	MODIFIER	CC2G_001231		c.-1850C>T					1850	Intergenic	hypothetical protein
CC2G_001311-T1	scaffold_1	3075489	3_prime_UTR_variant	MODIFIER	CC2G_001311	3/3	c.*511T>C					511	3'-UTR	vacuolar protein sorting-associated protein 27
CC2G_001735-T1	scaffold_1	4154720	3_prime_UTR_variant	MODIFIER	CC2G_001735	3/3	c.*140T>C					140	3'-UTR	hypothetical protein
CC2G_001753-T1	scaffold_1	4198089	missense_variant	MODERATE	CC2G_001753	6/6	c.2105T>C	2283/2564	2105/2112	p.Val702Ala	702/703		CDS	hypothetical protein
CC2G_001828-T1	scaffold_10	104083	upstream_gene_variant	MODIFIER	CC2G_001828		c.-1027T>C					1027	Intergenic	hypothetical protein
CC2G_002129-T1	scaffold_10	834616	downstream_gene_variant	MODIFIER	CC2G_002129		c.*3665T>C					3665	Intergenic	hypothetical protein
CC2G_002222-T1	scaffold_10	1070182	upstream_gene_variant	MODIFIER	CC2G_002222		c.-4852A>G					4852	Intergenic	beta-glucan synthesis-associated protein KRE6
CC2G_002305-T1	scaffold_10	1276619	missense_variant	MODERATE	CC2G_002305	2/2	c.352T>C	352/734	352/546	p.Ser118Pro	118/181		CDS	hypothetical protein
CC2G_002341-T1	scaffold_10	1348506	missense_variant	MODERATE	CC2G_002341	2/6	c.386G>A	386/1728	386/1728	p.Gly129Asp	129/575		CDS	RTF domain-containing protein
CC2G_002399-T1	scaffold_10	1537431	upstream_gene_variant	MODIFIER	CC2G_002399		c.-756T>C					756	Intergenic	FAD binding domain-containing protein
CC2G_002575-T1	scaffold_10	1945912	missense_variant	MODERATE	CC2G_002575	6/6	c.1086G>A	1270/2181	1086/1662	p.Met362Ile	362/553		CDS	hypothetical protein
CC2G_002588-T1	scaffold_10	1981253	upstream_gene_variant	MODIFIER	CC2G_002588		c.-757T>C					707	Intergenic	CoH2
CC2G_003096-T1	scaffold_11	1030266	3_prime_UTR_variant	MODIFIER	CC2G_003096	3/3	c.*362T>C					362	3'-UTR	hypothetical protein
CC2G_003107-T1	scaffold_11	1061238	3_prime_UTR_variant	MODIFIER	CC2G_003107	4/4	c.*479T>C					607	3'-UTR	hypothetical protein
CC2G_003123-T1	scaffold_11	1113291	upstream_gene_variant	MODIFIER	CC2G_003123		c.-1977A>G					1977	Intergenic	CAMK/CAMK1 protein kinase
CC2G_003350-T1	scaffold_11	1716350	synonymous_variant	LOW	CC2G_003350	1/1	c.558T>C	p.Ala186Ala	558/816	558/816	186/271		CDS	hypothetical protein
CC2G_003915-T1	scaffold_12	934723	upstream_gene_variant	MODIFIER	CC2G_003915		c.-4236A>G					4007	Intergenic	proline-tRNA ligase
CC2G_005036-T1	scaffold_2	106997	upstream_gene_variant	MODIFIER	CC2G_005036		c.-4151A>G					4070	Intergenic	vegetative incompatibility protein HET-E-1
CC2G_005198-T1	scaffold_2	562189	downstream_gene_variant	MODIFIER	CC2G_005198		c.*237T>C					237	Intergenic	hypothetical protein
CC2G_005257-T1	scaffold_2	748491	3_prime_UTR_variant	MODIFIER	CC2G_005257	6/6	c.*194T>C					194	3'-UTR	hypothetical protein
CC2G_005394-T1	scaffold_2	1060973	upstream_gene_variant	MODIFIER	CC2G_005394		c.-2410T>C					2325	Intergenic	3-hydroxyisobutyryl-Coenzyme A hydrolase isoform 1
CC2G_005465-T1	scaffold_2	1221503	upstream_gene_variant	MODIFIER	CC2G_005465		c.-2320A>G					2320	Intergenic	membrane transporter
CC2G_005467-T1	scaffold_2	1221488	3_prime_UTR_variant	MODIFIER	CC2G_005467	7/7	c.*229T>C					229	3'-UTR	GTP-binding nuclear protein RAN
CC2G_005487-T1	scaffold_2	1259328	missense_variant	MODERATE	CC2G_005487	19/30	c.1277T>C	1277/5040	1277/5040	p.Leu426Ser	426/1679		CDS	calcium ion transporter
CC2G_005487-T1	scaffold_2	1259329	synonymous_variant	LOW	CC2G_005487	19/30	c.1278G>A	1278/5040	1278/5040	p.Leu426Leu	426/1679		CDS	calcium ion transporter
CC2G_005532-T1	scaffold_2	1360698	upstream_gene_variant	MODIFIER	CC2G_005532		c.-4713A>G					4713	Intergenic	hypothetical protein
CC2G_005682-T1	scaffold_2	1735269	synonymous_variant	LOW	CC2G_005682	2/3	c.462A>T	462/1476	462/1476	p.Val154Val	154/491		CDS	glycoamidase
CC2G_005689-T1	scaffold_2	1749556	upstream_gene_variant	MODIFIER	CC2G_005689		c.-136T>C					12	Intergenic	hypothetical protein
CC2G_005706-T1	scaffold_2	1785435	upstream_gene_variant	MODIFIER	CC2G_005706		c.-2637C>T					2637	Intergenic	priB protein
CC2G_005756-T1	scaffold_2	1885302	missense_variant	MODERATE	CC2G_005756	2/3	c.349C>T	370/1230	349/1137	p.Pro117Ser	117/378		CDS	hypothetical protein
CC2G_005909-T1	scaffold_2	2232057	upstream_gene_variant	MODIFIER	CC2G_005909		c.-2877A>G					2877	Intergenic	Sdad1 protein
CC2G_005952-T1	scaffold_2	2371304	missense_variant	MODERATE	CC2G_005952	1/1	c.904A>G	930/938	904/912	p.Arg302Gly	302/303		CDS	hypothetical protein
CC2G_005956-T1	scaffold_2	2381165	upstream_gene_variant	MODIFIER	CC2G_005956		c.-722T>C					722	Intergenic	hypothetical protein
CC2G_005976-T1	scaffold_2	2427252	3_prime_UTR_variant	MODIFIER	CC2G_005976	7/7	c.*312T>C					312	3'-UTR	hypothetical protein
CC2G_006018-T1	scaffold_2	2510595	stop_gained	HIGH	CC2G_006018	1/1	c.1065T>G	1065/1890	1065/1890	p.Tyr355*	355/629		CDS	hypothetical protein
CC2G_006019-T1	scaffold_2	2515448	3_prime_UTR_variant	MODIFIER	CC2G_006019	10/10	c.*99T>C					99	3'-UTR	glutathione-disulfide reductase
CC2G_006025-T1	scaffold_2	2529690	5_prime_UTR_variant	MODIFIER	CC2G_006025	1/4	c.-7G>T					7	5'-UTR	ubiquinol-cytochrome-c reductase complex subunit 6
CC2G_006034-T1	scaffold_2	2551029	upstream_gene_variant	MODIFIER	CC2G_006034		c.-4105A>G					4105	Intergenic	hypothetical protein
CC2G_006034-T1	scaffold_2	2551030	upstream_gene_variant	MODIFIER	CC2G_006034		c.-4106A>G					4106	Intergenic	hypothetical protein
CC2G_006066-T1	scaffold_2	2613507	upstream_gene_variant	MODIFIER	CC2G_006066		c.-1458A>G					1458	Intergenic	hypothetical protein
CC2G_006122-T1	scaffold_2	2737543	3_prime_UTR_variant	MODIFIER	CC2G_006122	10/10	c.*73T>C					73	3'-UTR	glucuronyl hydrolase
CC2G_006139-T1	scaffold_2	2766799	upstream_gene_variant	MODIFIER	CC2G_006139		c.-178G>A					45	Intergenic	hypothetical protein
CC2G_006158-T1	scaffold_2	2821627	synonymous_variant	LOW	CC2G_006158	2/2	c.903A>G	903/927	903/927	p.Arg301Arg	301/308		CDS	40S ribosomal protein S0
CC2G_006210-T1	scaffold_2	2978592	missense_variant	MODERATE	CC2G_006210	1/2	c.196T>C	224/928	196/576	p.Ser66Pro	66/191		CDS	hypothetical protein
CC2G_006292-T1	scaffold_2	3148084	synonymous_variant	LOW	CC2G_006292	2/6	c.567A>C	689/2034	567/1422	p.Ser189Ser	189/473		CDS	hypothetical protein
CC2G_006350-T1	scaffold_2	3292332	downstream_gene_variant	MODIFIER	CC2G_006350		c.*2872G>A					1955	Intergenic	protein phosphatase regulator
CC2G_006393-T1	scaffold_2	3382372	upstream_gene_variant	MODIFIER	CC2G_006393		c.-449T>C					449	Intergenic	hypothetical protein
CC2G_006429-T1	scaffold_2	3479660	3_prime_UTR_variant	MODIFIER	CC2G_006429	4/4	c.*78T>C					78	3'-UTR	hypothetical protein
CC2G_006429-T1	scaffold_2	3479677	3_prime_UTR_variant	MODIFIER	CC2G_006429	4/4	c.*95T>C					95	3'-UTR	hypothetical protein
CC2G_006532-T1	scaffold_2	3710952	synonymous_variant	LOW	CC2G_006532	4/5	c.213G>A	244/757	213/360	p.Glu71Glu	71/119		CDS	hypothetical protein
CC2G_006878-T1	scaffold_3	353802	synonymous_variant	LOW	CC2G_006878	5/8	c.1386T>C	1386/3583	1386/3459	p.Ala462Ala	462/1152		CDS	STE-12 alpha
CC2G_006891-T1	scaffold_3	389669	upstream_gene_variant	MODIFIER	CC2G_006891		c.-3404A>G					3277	Intergenic	hypothetical protein
CC2G_006910-T1	scaffold_3	440835	upstream_gene_variant	MODIFIER	CC2G_006910		c.-1054T>C					1054	Intergenic	hypothetical protein
CC2G_007047-T1	scaffold_3	774254	missense_variant	MODERATE	CC2G_007047	1/2	c.20T>C	20/201	20/201	p.Leu7Pro	7/66		CDS	hypothetical protein
CC2G_007065-T1	scaffold_3	819613	upstream_gene_variant	MODIFIER	CC2G_007065		c.-3555G>C					3516	Intergenic	hypothetical protein
CC2G_007193-T1	scaffold_3	1144601	3_prime_UTR_variant	MODIFIER	CC2G_007193	9/9	c.*370T>C					370	3'-UTR	STE/STE11 protein kinase
CC2G_007196-T1	scaffold_3	1149605	upstream_gene_variant	MODIFIER	CC2G_007196		c.-1348T>C					1099	Intergenic	hst3 protein
CC2G_007202-T1	scaffold_3	1168764	3_prime_UTR_variant	MODIFIER	CC2G_007202	3/3	c.*91T>C					91	3'-UTR	hypothetical protein
CC2G_007218-T1	scaffold_3	1206135	3_prime_UTR_variant	MODIFIER	CC2G_007218	7/7	c.*381T>C					381	3'-UTR	hypothetical protein
CC2G_007248-T1	scaffold_3	1295982	synonymous_variant	LOW	CC2G_007248	4/4	c.1242G>A	1426/2018	1242/1494	p.Gly414Gly	414/497		CDS	PH domain-containing protein
CC2G_007475-T1	scaffold_3	1849068	3_prime_UTR_variant	MODIFIER	CC2G_007475	2/2	c.*192T>C					192	3'-UTR	chaperone
CC2G_007475-T1	scaffold_3	1849034	3_prime_UTR_variant	MODIFIER	CC2G_007475	2/2	c.*158T>C					158	3'-UTR	chaperone
CC2G_007532-T1	scaffold_3	1975405	upstream_gene_variant	MODIFIER	CC2G_007532		c.-2447C>G					2408	Intergenic	hypothetical protein
CC2G_007698-T1	scaffold_3	2385155	upstream_gene_variant	MODIFIER	CC2G_007698		c.-181T>C					181	Intergenic	other/CAMKK/ELM protein kinase
CC2G_007713-T1	scaffold_3	2429081	3_prime_UTR_variant	MODIFIER	CC2G_007713	7/7	c.*195T>C					195	3'-UTR	serine/threonine/tyrosine-interacting protein
CC2G_008057-T1	scaffold_3	3296081	synonymous_variant	LOW	CC2G_008057	1/6	c.294A>G	294/4023	294/4023	p.Arg98Arg	98/1340		CDS	CAMK/CAMKL/GIN4 protein kinase
CC2G_008119-T1	scaffold_3	3441815	3_prime_UTR_variant	MODIFIER	CC2G_008119	7/9	c.*337T>C					337	3'-UTR	septin AspB
CC2G_008200-T1	scaffold_3	3634204	3_prime_UTR_variant	MODIFIER	CC2G_008200	14/14	c.*95T>C					95	3'-UTR	hypothetical protein
CC2G_008212-T1	scaffold_3	3654547	3_prime_UTR_variant	MODIFIER	CC2G_008212	8/8	c.*78T>C					78	3'-UTR	hexose transporter
CC2G_008259-T1	scaffold_4	23224	synonymous_variant	LOW	CC2G_008259	11/16	c.1767T>C	1975/3644	1767/2973	p.Asn589Asn	589/990		CDS	RAN binding protein-like protein
CC2G_008303-T1	scaffold_4	150194	missense_variant	MODERATE	CC2G_008303	1/1	c.75A>T	75/90	75/90	p.Gln25His	25/29		CDS	NA
CC2G_008337-T1	scaffold_4	234714	3_prime_UTR_variant	MODIFIER	CC2G_008337	3/3	c.*149T>C					149	3'-UTR	hypothetical protein
CC2G_008341-T1	scaffold_4	245909	synonymous_variant	LOW	CC2G_008341	6/7	c.3033A>G	3692/5547	3033/3048	p.Arg1011Arg	1011/1015		CDS	hypothetical protein
CC2G_008380-T1	scaffold_4	333285	missense_variant	MODERATE	CC2G_008380	9/11	c.1759C>G	1811/4406	1759/2892	p.Arg587Gly	587/963		CDS	bromodomain and PHD finger-containing protein 3
CC2G_008431-T1	scaffold_4	460557	upstream_gene_variant	MODIFIER	CC2G_008431		c.-3660T>C					3660	Intergenic	hypothetical protein
CC2G_008476-T1	scaffold_4	552893	synonymous_variant	LOW	CC2G_008476	1/2	c.1269C>G	1269/3189	1269/3189	p.Ala423Ala	423/1062		CDS	hypothetical protein
CC2G_008476-T1	scaffold_4	552906	synonymous_variant	LOW	CC2G_008476	1/2	c.1282C>T	1282/3189	1282/3189	p.Leu428Leu	428/1062		CDS	hypothetical protein
CC2G_008700-T1	scaffold_4	1123601	3_prime_UTR_variant	MODIFIER	CC2G_008700	4/4	c.*324T>C					324	3'-UTR	hypothetical protein
CC2G_008748-T1	scaffold_4	1256755	upstream_gene_variant	MODIFIER	CC2G_008748		c.-3225A>C					3225	Intergenic	cell division control protein 23
CC2G_008812-T1	scaffold_4	1395013	3_prime_UTR_variant	MODIFIER	CC2G_008812	2/2	c.*333T>C					333	3'-UTR	hypothetical protein
CC2G_008873-T1	scaffold_4	1538257	missense_variant	MODERATE	CC2G_008873	6/7	c.2201T>C	2463/3737	2201/3219	p.Val734Ala	734/1072		CDS	hypothetical protein
CC2G_008935-T1	scaffold_4	1700924	synonymous_variant	LOW	CC2G_008935	6/8	c.3111A>G	3111/3585	3111/3585	p.Arg1037Arg	1037/1194		CDS	hypothetical protein
CC2G_008975-T1	scaffold_4	1791420	3_prime_UTR_variant	MODIFIER	CC2G_008975	7/7	c.*168T>C					168	3'-UTR	STE/STE11 protein kinase
CC2G_008997-T1	scaffold_4	1839392	5_prime_UTR_variant	MODIFIER	CC2G_008997	1/5	c.-146C>A					146	5'-UTR	hypothetical protein
CC2G_009059-T1	scaffold_4	1979942	missense_variant	MODERATE	CC2G_009059	3/4	c.1850C>T	1850/2547	1850/2547	p.Thr617Met	617/848		CDS	hypothetical protein
CC2G_009059-T1	scaffold_4	1979944	synonymous_variant	LOW	CC2G_009059	3/4	c.1848C>T	1848/2547	1848/2547	p.Ala616Ala	616/848		CDS	hypothetical protein
CC2G_009059-T1	scaffold_4	1979947	synonymous_variant	LOW	CC2G_009059	3/4	c.1845C>T	1845/2547	1845/2547	p.Pro615Pro	615/848		CDS	hypothetical protein
CC2G_009152-T1	scaffold_4	2176035	3_prime_UTR_variant	MODIFIER	CC2G_009152	7/7	c.*162T>C					162	3'-UTR	polyadenylate-binding protein
CC2G_009152-T1	scaffold_4	2176038	3_prime_UTR_variant	MODIFIER	CC2G_009152	7/7	c.*165T>C					165	3'-UTR	polyadenylate-binding protein
CC2G_009269-T1	scaffold_4	2463801	upstream_gene_variant	MODIFIER	CC2G_009269		c.-1395A>G					1382	Intergenic	tyrosine-tRNA ligase
CC2G_009307-T1	scaffold_4	2543396	upstream_gene_variant	MODIFIER	CC2G_009307		c.-2243T>C					1819	Intergenic	endoplasmic reticulum protein
CC2G_009368-T1	scaffold_4	2703692	upstream_gene_variant	MODIFIER	CC2G_009368		c.-1938A>G					1861	Intergenic	hypothetical protein
CC2G_009483-T1	scaffold_4	2987588	upstream_gene_variant	MODIFIER	CC2G_009483		c.-4650A>G					3567	Intergenic	hypothetical protein
CC2G_009620-T1	scaffold_4	3293778	upstream_gene_variant	MODIFIER	CC2G_009620		c.-1861A>G					1507	Intergenic	amidohydrolase 2
CC2G_009712-T1	scaffold_4	3528507	upstream_gene_variant	MODIFIER	CC2G_009712		c.-978T>C					978	Intergenic	hypothetical protein
CC2G_009773-T1	scaffold_4	3679890	missense_variant	MODERATE	CC2G_009773	9/9	c.1480A>G	2110/2174	1480/1497	p.Thr494Ala	494/498		CDS	FAD binding domain-containing protein
CC2G_009794-T1	scaffold_5	20053	upstream_gene_variant	MODIFIER	CC2G_009794		c.-2170A>G					2170	Intergenic	hypothetical protein
CC2G_009872-T1	scaffold_5	213583	synonymous_variant	LOW	CC2G_009872	2/2	c.897C>T	1357/2090	897/1050	p.Ala299Ala	299/349		CDS	hypothetical protein
CC2G_009881-T1	scaffold_5	238930	missense_variant	MODERATE	CC2G_009881	3/12	c.1317A>T	1317/2793	1317/2793	p.Glu439Asp	439/930		CDS	copper amine oxidase
CC2G_009883-T1	scaffold_5	248001	upstream_gene_variant	MODIFIER	CC2G_009883		c.-1886A>G					850	Intergenic	hexose transporter
CC2G_010061-T1	scaffold_5	681007	missense_variant	MODERATE	CC2G_010061	2/2	c.710T>C	710/867	710/867	p.Val237Ala	237/288		CDS	phosphoadenylyl-sulfate reductase
CC2G_010066-T1	scaffold_5	694941	synonymous_variant	LOW	CC2G_010066	6/6	c.3462A>G	3976/4656	3462/3870	p.Ala1154Ala	1154/1289		CDS	hypothetical protein
CC2G_010208-T1	scaffold_5	1037802	3_prime_UTR_variant	MODIFIER	CC2G_010208	6/6	c.*92T>C					92	3'-UTR	U1 snRNP C
CC2G_010209-T1	scaffold_5	1037982	5_prime_UTR_variant	MODIFIER	CC2G_010209	1/4	c.-36C>T					36	5'-UTR	vacuolar transporter chaperone 1
CC2G_010246-T1	scaffold_5	1133937	upstream_gene_variant	MODIFIER	CC2G_010246		c.-4934G>A					4861	Intergenic	hypothetical protein
CC2G_010250-T1	scaffold_5	1136932	5_prime_UTR_premature_start_codon_gain_variant	LOW	CC2G_010250	1/5	c.-1059A>G						5'-UTR	hypothetical protein
CC2G_010259-T1	scaffold_5	1159417	5_prime_UTR_variant	MODIFIER	CC2G_010259	2/3	c.-68G>C					123	5'-UTR	hypothetical protein
CC2G_010321-T1	scaffold_5	1287504	3_prime_UTR_variant	MODIFIER	CC2G_010321	6/6	c.*57T>C					57	3'-UTR	proteasome 26S subunit
CC2G_010345-T1	scaffold_5	1344836	upstream_gene_variant	MODIFIER	CC2G_010345		c.-3778A>G					3778	Intergenic	hypothetical protein
CC2G_010366-T1	scaffold_5	1384591	3_prime_UTR_variant	MODIFIER	CC2G_010366	8/8	c.*403T>C					403	3'-UTR	hexokinase
CC2G_010374-T1	scaffold_5	1393409	3_prime_UTR_variant	MODIFIER	CC2G_010374	4/4	c.*778T>C					778	3'-UTR	hypothetical protein
CC2G_010388-T1	scaffold_5	1430443	stop_lost&splice_region_variant	HIGH	CC2G_010388	2/2	c.456A>C	456/456	456/456	p.Ter152Tyrext*?	152/151		CDS	cytoplasmic protein
CC2G_010491-T1	scaffold_5	1653646	5_prime_UTR_variant	MODIFIER	CC2G_010491	1/14	c.-11A>T					11	5'-UTR	isocitrate dehydrogenase
CC2G_010496-T1	scaffold_5	1663250	3_prime_UTR_variant	MODIFIER	CC2G_010496	5/5	c.*116T>C					170	3'-UTR	polyadenylate-binding protein
CC2G_010515-T1	scaffold_5	1720733	upstream_gene_variant	MODIFIER	CC2G_010515		c.-1076A>G					1068	Intergenic	kDa Trp-Asp repeats containing protein
CC2G_010527-T1	scaffold_5	1736589	upstream_gene_variant	MODIFIER	CC2G_010527		c.-1062T>C					1062	Intergenic	glucose-6-phosphate 1-dehydrogenase
CC2G_010613-T1	scaffold_5	1922855	upstream_gene_variant	MODIFIER	CC2G_010613		c.-2622A>G					2622	Intergenic	hypothetical protein
CC2G_010613-T1	scaffold_5	1922864	upstream_gene_variant	MODIFIER	CC2G_010613		c.-2631G>T					2631	Intergenic	hypothetical protein
CC2G_010667-T1	scaffold_5	2040910	upstream_gene_variant	MODIFIER	CC2G_010667		c.-4311A>G					4311	Intergenic	hypothetical protein
CC2G_010746-T1	scaffold_5	2198880	upstream_gene_variant	MODIFIER	CC2G_010746		c.-2967A>G					2943	Intergenic	ER-to-Golgi transporter
CC2G_010838-T1	scaffold_5	2392727	upstream_gene_variant	MODIFIER	CC2G_010838		c.-1415A>G					1415	Intergenic	COPII-coated vesicle protein
CC2G_010958-T1	scaffold_5	2758885	3_prime_UTR_variant	MODIFIER	CC2G_010958	7/7	c.*24T>C					24	3'-UTR	calcium-dependent protein serine/threonine phosphatase
CC2G_010966-T1	scaffold_5	2775536	3_prime_UTR_variant	MODIFIER	CC2G_010966	3/3	c.*110T>C					110	3'-UTR	40S ribosomal protein S25
CC2G_011090-T1	scaffold_5	3082927	upstream_gene_variant	MODIFIER	CC2G_011090		c.-433T>C					433	Intergenic	mannosyltransferase 1
CC2G_011095-T1	scaffold_5	3098055	3_prime_UTR_variant	MODIFIER	CC2G_011095	9/9	c.*79T>C					79	3'-UTR	fructose-bisphosphate aldolase
CC2G_011145-T1	scaffold_5	3215213	3_prime_UTR_variant	MODIFIER	CC2G_011145	4/4	c.*161T>C					161	3'-UTR	hypothetical protein
CC2G_011167-T1	scaffold_5	3271892	3_prime_UTR_variant	MODIFIER	CC2G_011167	3/3	c.*53T>C					53	3'-UTR	hypothetical protein
CC2G_011202-T1	scaffold_5	3368301	upstream_gene_variant	MODIFIER	CC2G_011202		c.-4438A>G					4438	Intergenic	hypothetical protein
CC2G_011391-T1	scaffold_6	411429	upstream_gene_variant	MODIFIER	CC2G_011391		c.-4295T>C					4295	Intergenic	hypothetical protein
CC2G_011470-T1	scaffold_6	584885	synonymous_variant	LOW	CC2G_011470	4/4	c.1833T>C	1833/1953	1833/1953	p.Gly611Gly	611/650		CDS	RNA helicase
CC2G_011497-T1	scaffold_6	658469	upstream_gene_variant	MODIFIER	CC2G_011497		c.-3239A>G					3239	Intergenic	hst3 protein
CC2G_011576-T1	scaffold_6	838721	3_prime_UTR_variant	MODIFIER	CC2G_011576	2/2	c.*336T>C					336	3'-UTR	hypothetical protein
CC2G_011592-T1	scaffold_6	881758	3_prime_UTR_variant	MODIFIER	CC2G_011592	2/2	c.*488T>C					488	3'-UTR	hypothetical protein
CC2G_011671-T1	scaffold_6	1127238	3_prime_UTR_variant	MODIFIER	CC2G_011671	13/13	c.*67T>C					67	3'-UTR	glycogen debranching enzyme
CC2G_011759-T1	scaffold_6	1334690	missense_variant	MODERATE	CC2G_011759	4/11	c.303A>G	400/1726	303/1356	p.Ile101Met	101/451		CDS	hypothetical protein
CC2G_011759-T1	scaffold_6	1337796	upstream_gene_variant	MODIFIER	CC2G_011759		c.-2636G>T					2539	Intergenic	hypothetical protein
CC2G_011788-T1	scaffold_6	1387991	upstream_gene_variant	MODIFIER	CC2G_011788		c.-1879A>G					1497	Intergenic	GTP cyclohydrolase II
CC2G_011828-T1	scaffold_6	1474161	upstream_gene_variant	MODIFIER	CC2G_011828		c.-3040C>A					3040	Intergenic	hypothetical protein
CC2G_011924-T1	scaffold_6	1726204	3_prime_UTR_variant	MODIFIER	CC2G_011924	8/8	c.*314T>C					376	3'-UTR	R,R-butanediol dehydrogenase
CC2G_011945-T1	scaffold_6	1791511	upstream_gene_variant	MODIFIER	CC2G_011945		c.-4888A>G					4888	Intergenic	calcium-transporting ATPase
CC2G_012077-T1	scaffold_6	2119980	upstream_gene_variant	MODIFIER	CC2G_012077		c.-3427G>A					3226	Intergenic	diacylglycerol O-acyltransferase
CC2G_012131-T1	scaffold_6	2283059	missense_variant	MODERATE	CC2G_012131	5/15	c.704T>C	804/3123	704/2907	p.Val235Ala	235/968		CDS	ubiquitin and ribosomal protein S27a
CC2G_012229-T1	scaffold_6	2508433	missense_variant	MODERATE	CC2G_012229	8/8	c.2113T>C	2113/2379	2113/2379	p.Ser705Pro	705/792		CDS	F-box and WD repeat-containing protein
CC2G_012292-T1	scaffold_6	2657017	3_prime_UTR_variant	MODIFIER	CC2G_012292	3/3	c.*99T>C					99	3'-UTR	hypothetical protein
CC2G_012552-T1	scaffold_7	543630	upstream_gene_variant	MODIFIER	CC2G_012552		c.-3901A>G					3901	Intergenic	FAD binding domain-containing protein
CC2G_012609-T1	scaffold_7	656275	missense_variant	MODERATE	CC2G_012609	3/7	c.193G>C	193/768	193/768	p.Val65Leu	65/255		CDS	hypothetical protein
CC2G_012907-T1	scaffold_7	1368789	upstream_gene_variant	MODIFIER	CC2G_012907		c.-3114T>C					2942	Intergenic	RNA helicase
CC2G_013120-T1	scaffold_7	1880248	3_prime_UTR_variant	MODIFIER	CC2G_013120	4/4	c.*142T>C					199	3'-UTR	CGL3 lectin
CC2G_013268-T1	scaffold_7	2286837	synonymous_variant	LOW	CC2G_013268	5/5	c.2421T>C	2527/3133	2421/3027	p.Gly807Gly	807/1008		CDS	hypothetical protein
CC2G_013326-T1	scaffold_7	2420293	downstream_gene_variant	MODIFIER	CC2G_013326		c.*4246A>C					4012	Intergenic	hypothetical protein
CC2G_013327-T1	scaffold_7	2421854	3_prime_UTR_variant	MODIFIER	CC2G_013327	22/22	c.*45T>C					45	3'-UTR	glycosyl hydrolase
CC2G_013549-T1	scaffold_8	285907	synonymous_variant	LOW	CC2G_013549	3/3	c.309T>C	309/363	309/363	p.Gly103Gly	103/120		CDS	small nuclear riboprotein Sm-D
CC2G_013611-T1	scaffold_8	453813	upstream_gene_variant	MODIFIER	CC2G_013611		c.-3041A>G					3041	Intergenic	lipase I
CC2G_013615-T1	scaffold_8	466588	upstream_gene_variant	MODIFIER	CC2G_013615		c.-4996T>C					4996	Intergenic	ATP-dependent rRNA helicase RRP3
CC2G_013617-T1	scaffold_8	467373	upstream_gene_variant	MODIFIER	CC2G_013617		c.-3289C>G					3289	Intergenic	hypothetical protein
CC2G_013634-T1	scaffold_8	516668	3_prime_UTR_variant	MODIFIER	CC2G_013634	3/3	c.*93T>C					93	3'-UTR	hypothetical protein
CC2G_013646-T1	scaffold_8	540429	3_prime_UTR_variant	MODIFIER	CC2G_013646	3/3	c.*73T>C					73	3'-UTR	hypothetical protein
CC2G_013659-T1	scaffold_8	577991	upstream_gene_variant	MODIFIER	CC2G_013659		c.-1682A>G					1682	Intergenic	hypothetical protein
CC2G_013807-T1	scaffold_8	888669	upstream_gene_variant	MODIFIER	CC2G_013807		c.-242T>C					159	Intergenic	hypothetical protein
CC2G_013816-T1	scaffold_8	910060	3_prime_UTR_variant	MODIFIER	CC2G_013816	5/5	c.*170T>C					170	3'-UTR	ubiquitin-conjugating enzyme E2
CC2G_013850-T1	scaffold_8	991801	3_prime_UTR_variant	MODIFIER	CC2G_013850	4/4	c.*161T>C					161	3'-UTR	hypothetical protein
CC2G_013893-T1	scaffold_8	1107144	upstream_gene_variant	MODIFIER	CC2G_013893		c.-1182A>G					1111	Intergenic	histone H2A
CC2G_013948-T1	scaffold_8	1232115	3_prime_UTR_variant	MODIFIER	CC2G_013948	6/6	c.*126G>A					126	3'-UTR	sterol 24-C-methyltransferase
CC2G_014084-T1	scaffold_8	1590779	3_prime_UTR_variant	MODIFIER	CC2G_014084	2/2	c.*378T>C					434	3'-UTR	hypothetical protein
CC2G_014093-T1	scaffold_8	1609296	3_prime_UTR_variant	MODIFIER	CC2G_014093	10/10	c.*90T>C					90	3'-UTR	peroxidase TAP
CC2G_014113-T1	scaffold_8	1659415	upstream_gene_variant	MODIFIER	CC2G_014113		c.-261T>C					261	Intergenic	hypothetical protein
CC2G_014257-T1	scaffold_8	2059304	missense_variant	MODERATE	CC2G_014257	8/15	c.1575A>T	1678/3614	1575/3261	p.Gln525His	525/1086		CDS	calcium-transporting ATPase
CC2G_014257-T1	scaffold_8	2061571	3_prime_UTR_variant	MODIFIER	CC2G_014257	15/15	c.*217T>C					217	3'-UTR	calcium-transporting ATPase
CC2G_014276-T1	scaffold_8	2141405	upstream_gene_variant	MODIFIER	CC2G_014276		c.-2523A>G					2427	Intergenic	other/FunK1 protein kinase
CC2G_014529-T1	scaffold_9	249171	missense_variant	MODERATE	CC2G_014529	3/3	c.439T>A	605/920	439/540	p.Leu147Met	147/179		CDS	hypothetical protein
CC2G_014529-T1	scaffold_9	249205	missense_variant	MODERATE	CC2G_014529	3/3	c.473C>T	639/920	473/540	p.Ala158Val	158/179		CDS	hypothetical protein
CC2G_014529-T1	scaffold_9	249245	synonymous_variant	LOW	CC2G_014529	3/3	c.513T>C	679/920	513/540	p.Phe171Phe	171/179		CDS	hypothetical protein
CC2G_014608-T1	scaffold_9	445868	missense_variant	MODERATE	CC2G_014608	11/12	c.2804G>A	2967/4859	2804/3537	p.Gly935Glu	935/1178		CDS	topoisomerase 1-associated factor 1
CC2G_014713-T1	scaffold_9	714012	synonymous_variant	LOW	CC2G_014713	2/5	c.408A>G	575/3180	408/1764	p.Leu136Leu	136/587		CDS	nucleoporin autopeptidase
CC2G_014713-T1	scaffold_9	714024	synonymous_variant	LOW	CC2G_014713	2/5	c.396T>G	563/3180	396/1764	p.Thr132Thr	132/587		CDS	nucleoporin autopeptidase
CC2G_014713-T1	scaffold_9	715850	upstream_gene_variant	MODIFIER	CC2G_014713		c.-1357A>G					1190	Intergenic	nucleoporin autopeptidase
CC2G_014769-T1	scaffold_9	849019	upstream_gene_variant	MODIFIER	CC2G_014769		c.-2395A>G					1850	Intergenic	hypothetical protein
CC2G_014797-T1	scaffold_9	898670	3_prime_UTR_variant	MODIFIER	CC2G_014797	4/4	c.*62T>C					62	3'-UTR	hypothetical protein
CC2G_014878-T1	scaffold_9	1082646	synonymous_variant	LOW	CC2G_014878	1/2	c.63T>C	63/501	63/501	p.Ala21Ala	21/166		CDS	hypothetical protein
CC2G_014878-T1	scaffold_9	1082652	synonymous_variant	LOW	CC2G_014878	1/2	c.69T>C	69/501	69/501	p.Asp23Asp	23/166		CDS	hypothetical protein
CC2G_014961-T1	scaffold_9	1276926	upstream_gene_variant	MODIFIER	CC2G_014961		c.-2711T>C					2405	Intergenic	hypothetical protein
CC2G_014961-T1	scaffold_9	1276928	upstream_gene_variant	MODIFIER	CC2G_014961		c.-2709T>C					2403	Intergenic	hypothetical protein
CC2G_014986-T1	scaffold_9	1352057	upstream_gene_variant	MODIFIER	CC2G_014986		c.-683T>C					683	Intergenic	nuclear distribution protein nudF
CC2G_015014-T1	scaffold_9	1427908	synonymous_variant	LOW	CC2G_015014	1/3	c.1317T>A	1317/1587	1317/1587	p.Ile439Ile	439/528		CDS	histone-lysine N-methyltransferase
CC2G_015057-T1	scaffold_9	1538978	3_prime_UTR_variant	MODIFIER	CC2G_015057	3/3	c.*138C>T					138	3'-UTR	membrane fraction protein
CC2G_015191-T1	scaffold_9	1901616	upstream_gene_variant	MODIFIER	CC2G_015191		c.-2251A>G					2251	Intergenic	60s acidic ribosomal protein
