# Supplementary material for: The Genome-Wide Characterization of Alternative Splicing and RNA Editing in the Development of Coprinopsis cinerea
Source: J Fungi (Basel). 2023 Sep 9;9(9):915. doi: 10.3390/jof9090915 (PMC10532568; doi:10.3390/jof9090915)
Supplement: Supplementary file 1 [file jof-09-00915-s001.zip › DatasetS6_full_genome_alignment_of_Muraguchi2015_against_Xie2021.xlsx]

## Sheet: full_genome_alignment_of_Muragu
Qry.name	Qry.length	Qry.start	Qry.end	Strand	Ref.name	Ref.length	Ref.start	Ref.end	Number.matched.bases	Number.bases.with.gaps	Mapping.quality	Alignment.type	Number.minimizers.on.the.chain	Chain.score	Chain.score.best.secondary	Approximate.per-base.sequence.divergence	Length.query.repetitive.seeds
scaffold_149	65255	0	65252	+	scaffold_1	4326744	18007	19465	64598	65898	60	tp:A:P	cm:i:6475	s1:i:64467	s2:i:233	dv:f:0.0000	rl:i:0
scaffold_150	65588	23044	65583	-	scaffold_1	4326744	19480	20685	42504	42540	60	tp:A:P	cm:i:4253	s1:i:42504	s2:i:351	dv:f:0.0001	rl:i:28
scaffold_140	68064	10	68059	-	scaffold_1	4326744	22110	23945	68032	68050	60	tp:A:P	cm:i:6778	s1:i:68032	s2:i:301	dv:f:0.0000	rl:i:0
scaffold_144	67382	2	67377	-	scaffold_1	4326744	32588	34332	67364	67377	60	tp:A:P	cm:i:6718	s1:i:67364	s2:i:332	dv:f:0.0000	rl:i:0
scaffold_120	76213	7	76210	+	scaffold_1	4326744	40592	65766	76189	76203	60	tp:A:P	cm:i:7566	s1:i:76189	s2:i:306	dv:f:0.0000	rl:i:0
scaffold_121	75914	4	63131	-	scaffold_1	4326744	72170	97007	63014	63133	60	tp:A:P	cm:i:6287	s1:i:63014	s2:i:111	dv:f:0.0002	rl:i:0
scaffold_1	622701	175095	622689	+	scaffold_1	4326744	103286	180110	447434	447606	60	tp:A:P	cm:i:44701	s1:i:447432	s2:i:571	dv:f:0.0000	rl:i:0
scaffold_13	292063	10	292052	+	scaffold_1	4326744	180568	188300	291882	292047	60	tp:A:P	cm:i:29239	s1:i:291882	s2:i:306	dv:f:0.0000	rl:i:0
scaffold_117	76979	13815	76978	+	scaffold_1	4326744	188786	221964	63126	63163	60	tp:A:P	cm:i:6333	s1:i:63126	s2:i:618	dv:f:0.0000	rl:i:0
scaffold_129	72472	44651	72459	-	scaffold_1	4326744	222234	230514	27740	27808	60	tp:A:P	cm:i:2752	s1:i:27740	s2:i:316	dv:f:0.0002	rl:i:0
scaffold_12	305909	10	171773	+	scaffold_1	4326744	236911	266602	171461	171763	60	tp:A:P	cm:i:17226	s1:i:171461	s2:i:687	dv:f:0.0001	rl:i:0
scaffold_100	86731	0	86727	-	scaffold_1	4326744	266781	335186	86619	86730	60	tp:A:P	cm:i:8719	s1:i:86617	s2:i:14327	dv:f:0.0001	rl:i:0
scaffold_107	83230	1	83223	-	scaffold_1	4326744	335237	466723	83150	83240	60	tp:A:P	cm:i:8325	s1:i:83146	s2:i:330	dv:f:0.0001	rl:i:0
scaffold_109	82820	12	82809	+	scaffold_1	4326744	464480	494442	82777	82797	60	tp:A:P	cm:i:8303	s1:i:82777	s2:i:338	dv:f:0.0000	rl:i:0
scaffold_108	83116	16	83105	-	scaffold_1	4326744	492828	575337	82974	83090	60	tp:A:P	cm:i:8325	s1:i:82972	s2:i:930	dv:f:0.0001	rl:i:0
scaffold_133	70584	64838	70566	+	scaffold_1	4326744	578666	583755	4798	5728	60	tp:A:P	cm:i:455	s1:i:4789	s2:i:646	dv:f:0.0107	rl:i:0
scaffold_12	305909	163674	305902	+	scaffold_1	4326744	584649	613895	126475	142234	60	tp:A:P	cm:i:12666	s1:i:126354	s2:i:0	dv:f:0.0062	rl:i:0
scaffold_137	69266	13586	69265	+	scaffold_1	4326744	628922	632325	55667	55700	60	tp:A:P	cm:i:5614	s1:i:55662	s2:i:563	dv:f:0.0000	rl:i:38
scaffold_136	69249	1	69241	-	scaffold_1	4326744	633181	636611	69166	69240	60	tp:A:P	cm:i:6939	s1:i:69164	s2:i:452	dv:f:0.0001	rl:i:0
scaffold_116	78141	5	47039	-	scaffold_1	4326744	644053	684232	47034	47034	60	tp:A:P	cm:i:4677	s1:i:47034	s2:i:381	dv:f:0.0000	rl:i:0
scaffold_137	69266	3	10938	-	scaffold_1	4326744	687036	690235	10908	10938	60	tp:A:P	cm:i:1086	s1:i:10908	s2:i:185	dv:f:0.0003	rl:i:38
scaffold_138	69030	15	4166	+	scaffold_1	4326744	697068	699660	3292	4151	60	tp:A:P	cm:i:321	s1:i:3280	s2:i:207	dv:f:0.0136	rl:i:0
scaffold_112	81613	3	79586	-	scaffold_1	4326744	699375	746994	79469	79583	60	tp:A:P	cm:i:7888	s1:i:79453	s2:i:314	dv:f:0.0001	rl:i:0
scaffold_105	83975	4	83962	+	scaffold_1	4326744	747058	802713	83620	83963	60	tp:A:P	cm:i:8406	s1:i:83564	s2:i:660	dv:f:0.0001	rl:i:0
scaffold_135	69639	15	69625	+	scaffold_1	4326744	803409	926936	68233	69611	60	tp:A:P	cm:i:6748	s1:i:68233	s2:i:144	dv:f:0.0000	rl:i:0
scaffold_110	81710	76980	81696	-	scaffold_1	4326744	938452	991091	4716	4716	60	tp:A:P	cm:i:469	s1:i:4716	s2:i:185	dv:f:0.0002	rl:i:0
scaffold_138	69030	2140	69025	-	scaffold_1	4326744	990914	1377240	66672	66886	60	tp:A:P	cm:i:6685	s1:i:66672	s2:i:145	dv:f:0.0003	rl:i:0
scaffold_153	63818	3	63810	-	scaffold_1	4326744	1377485	1714742	63802	63808	60	tp:A:P	cm:i:6292	s1:i:63802	s2:i:399	dv:f:0.0000	rl:i:0
scaffold_145	66777	9	66764	+	scaffold_1	4326744	1715412	2080024	66129	66755	60	tp:A:P	cm:i:6633	s1:i:66116	s2:i:616	dv:f:0.0000	rl:i:0
scaffold_131	71749	2	71747	-	scaffold_1	4326744	2080066	2087422	71713	71747	60	tp:A:P	cm:i:7129	s1:i:71713	s2:i:139	dv:f:0.0001	rl:i:0
scaffold_141	67590	11	8059	-	scaffold_1	4326744	2087360	2194066	7900	8051	60	tp:A:P	cm:i:779	s1:i:7900	s2:i:153	dv:f:0.0011	rl:i:0
scaffold_111	80257	10	80240	-	scaffold_1	4326744	2209154	2261566	80194	80231	60	tp:A:P	cm:i:8068	s1:i:80194	s2:i:226	dv:f:0.0000	rl:i:0
scaffold_155	63046	1	63033	+	scaffold_1	4326744	2262156	2357183	62961	63036	60	tp:A:P	cm:i:6275	s1:i:62961	s2:i:2315	dv:f:0.0001	rl:i:0
scaffold_126	73116	15	73080	+	scaffold_1	4326744	2357443	2369899	73053	73067	60	tp:A:P	cm:i:7261	s1:i:73053	s2:i:491	dv:f:0.0000	rl:i:0
scaffold_101	86237	5	86234	+	scaffold_1	4326744	2369682	2432836	86202	86230	60	tp:A:P	cm:i:8466	s1:i:86202	s2:i:310	dv:f:0.0000	rl:i:0
scaffold_133	70584	60404	66733	-	scaffold_1	4326744	2433006	2438228	6169	6331	60	tp:A:P	cm:i:611	s1:i:6169	s2:i:0	dv:f:0.0017	rl:i:0
scaffold_102	86107	8	86106	-	scaffold_1	4326744	2437926	2706701	86012	86118	60	tp:A:P	cm:i:8630	s1:i:86008	s2:i:310	dv:f:0.0001	rl:i:57
scaffold_14	288418	3	288410	-	scaffold_1	4326744	2706602	2818712	288283	288411	60	tp:A:P	cm:i:28878	s1:i:288283	s2:i:336	dv:f:0.0000	rl:i:38
scaffold_103	86368	5163	86362	+	scaffold_1	4326744	2818770	3078264	81199	81199	60	tp:A:P	cm:i:8125	s1:i:81199	s2:i:715	dv:f:0.0000	rl:i:0
scaffold_125	73438	14	73424	+	scaffold_1	4326744	3078798	3092917	73390	73411	60	tp:A:P	cm:i:7308	s1:i:73389	s2:i:591	dv:f:0.0000	rl:i:0
scaffold_152	64160	8	64159	+	scaffold_1	4326744	3093858	3095012	64078	64154	60	tp:A:P	cm:i:6380	s1:i:64078	s2:i:393	dv:f:0.0001	rl:i:0
scaffold_128	72509	17	72492	-	scaffold_1	4326744	3100688	3111121	72447	72487	60	tp:A:P	cm:i:7307	s1:i:72441	s2:i:326	dv:f:0.0001	rl:i:0
scaffold_147	68383	10	68381	-	scaffold_1	4326744	3111056	3112590	64373	68371	60	tp:A:P	cm:i:6467	s1:i:64373	s2:i:118	dv:f:0.0024	rl:i:0
scaffold_139	68267	3	68242	-	scaffold_1	4326744	3112780	3115307	68231	68239	60	tp:A:P	cm:i:6813	s1:i:68231	s2:i:345	dv:f:0.0000	rl:i:0
scaffold_142	67716	10	67707	-	scaffold_1	4326744	3116040	3117785	67415	67703	60	tp:A:P	cm:i:6690	s1:i:67413	s2:i:356	dv:f:0.0003	rl:i:0
scaffold_141	67590	7061	67588	+	scaffold_1	4326744	3118275	3120012	59970	60527	60	tp:A:P	cm:i:6031	s1:i:59963	s2:i:635	dv:f:0.0005	rl:i:0
scaffold_148	65884	13	65866	+	scaffold_1	4326744	3122576	3124029	65832	65853	60	tp:A:P	cm:i:6586	s1:i:65832	s2:i:256	dv:f:0.0000	rl:i:0
scaffold_151	64822	16	64810	+	scaffold_1	4326744	3126915	3128056	64793	64795	60	tp:A:P	cm:i:6481	s1:i:64793	s2:i:255	dv:f:0.0000	rl:i:0
scaffold_154	63496	17	63495	+	scaffold_1	4326744	3128091	3129184	63467	63480	60	tp:A:P	cm:i:6361	s1:i:63467	s2:i:78	dv:f:0.0000	rl:i:0
scaffold_143	67695	18	67695	+	scaffold_1	4326744	3129232	3130997	67677	67677	60	tp:A:P	cm:i:6730	s1:i:67677	s2:i:370	dv:f:0.0000	rl:i:0
scaffold_130	72379	9	72378	+	scaffold_1	4326744	3131982	3139369	72369	72369	60	tp:A:P	cm:i:7268	s1:i:72369	s2:i:314	dv:f:0.0000	rl:i:0
scaffold_15	286177	13	286174	+	scaffold_1	4326744	3139400	3140804	286107	286164	60	tp:A:P	cm:i:28495	s1:i:286107	s2:i:254	dv:f:0.0000	rl:i:0
scaffold_116	78141	47158	78131	+	scaffold_1	4326744	3147900	3184451	30964	30980	60	tp:A:P	cm:i:3082	s1:i:30963	s2:i:226	dv:f:0.0001	rl:i:0
scaffold_112	81613	79710	81597	-	scaffold_1	4326744	3184855	3230491	1887	1887	60	tp:A:P	cm:i:198	s1:i:1887	s2:i:330	dv:f:0.0005	rl:i:0
scaffold_115	77899	36953	77881	+	scaffold_1	4326744	3230763	3271898	40914	40928	60	tp:A:P	cm:i:4084	s1:i:40914	s2:i:93	dv:f:0.0001	rl:i:0
scaffold_129	72472	4	45441	+	scaffold_1	4326744	3276983	3286441	45417	45437	60	tp:A:P	cm:i:4571	s1:i:45417	s2:i:327	dv:f:0.0001	rl:i:0
scaffold_115	77899	10	37140	+	scaffold_1	4326744	3287018	3327646	37095	37133	60	tp:A:P	cm:i:3689	s1:i:37095	s2:i:0	dv:f:0.0001	rl:i:0
scaffold_106	83992	16	83982	+	scaffold_1	4326744	3328327	3477794	83947	83969	60	tp:A:P	cm:i:8427	s1:i:83947	s2:i:280	dv:f:0.0000	rl:i:0
scaffold_10	310285	11	310275	-	scaffold_1	4326744	3477891	3551297	310207	310277	60	tp:A:P	cm:i:31088	s1:i:310206	s2:i:600	dv:f:0.0000	rl:i:0
scaffold_11	309250	3	309244	+	scaffold_1	4326744	3552940	3601939	309214	309243	60	tp:A:P	cm:i:30861	s1:i:309214	s2:i:305	dv:f:0.0000	rl:i:0
scaffold_110	81710	8	76861	+	scaffold_1	4326744	3605227	3612014	76476	76856	60	tp:A:P	cm:i:7513	s1:i:76415	s2:i:295	dv:f:0.0002	rl:i:0
scaffold_114	78582	17	78571	+	scaffold_1	4326744	3614126	3656619	78349	78556	60	tp:A:P	cm:i:7847	s1:i:78343	s2:i:961	dv:f:0.0002	rl:i:0
scaffold_123	75008	10	75006	-	scaffold_1	4326744	3656719	3675192	74950	74997	60	tp:A:P	cm:i:7483	s1:i:74950	s2:i:328	dv:f:0.0000	rl:i:0
scaffold_133	70584	0	60270	+	scaffold_1	4326744	3674924	3681104	60270	60270	60	tp:A:P	cm:i:6051	s1:i:60270	s2:i:525	dv:f:0.0000	rl:i:0
scaffold_150	65588	13	22913	+	scaffold_1	4326744	3681200	3684329	21760	22907	60	tp:A:P	cm:i:2195	s1:i:21727	s2:i:180	dv:f:0.0004	rl:i:28
scaffold_124	74220	15	74207	-	scaffold_1	4326744	3684024	3824910	73996	74270	60	tp:A:P	cm:i:7413	s1:i:73977	s2:i:306	dv:f:0.0001	rl:i:0
scaffold_113	79181	15	79170	+	scaffold_1	4326744	3824359	3867573	79099	79158	60	tp:A:P	cm:i:7887	s1:i:79099	s2:i:326	dv:f:0.0001	rl:i:0
scaffold_104	84307	15	84289	+	scaffold_1	4326744	3881658	3938633	84256	84274	60	tp:A:P	cm:i:8371	s1:i:84256	s2:i:283	dv:f:0.0000	rl:i:0
scaffold_147	68383	5847	8923	-	scaffold_1	4326744	3939016	3940489	3067	3076	60	tp:A:P	cm:i:301	s1:i:3067	s2:i:849	dv:f:0.0007	rl:i:0
scaffold_146	67985	24624	67974	-	scaffold_1	4326744	3940652	4046491	42644	43612	60	tp:A:P	cm:i:4249	s1:i:42589	s2:i:422	dv:f:0.0001	rl:i:19
scaffold_132	71273	6	71271	+	scaffold_1	4326744	4045684	4052463	71204	71266	60	tp:A:P	cm:i:7136	s1:i:71201	s2:i:402	dv:f:0.0001	rl:i:0
scaffold_118	76842	17	76830	+	scaffold_1	4326744	4053029	4065418	76760	76832	60	tp:A:P	cm:i:7693	s1:i:76754	s2:i:338	dv:f:0.0000	rl:i:41
scaffold_117	76979	16	14169	+	scaffold_1	4326744	4065350	4087378	14153	14153	60	tp:A:P	cm:i:1397	s1:i:14153	s2:i:78	dv:f:0.0000	rl:i:0
scaffold_1	622701	1	173027	+	scaffold_1	4326744	4087871	4097069	172800	173026	60	tp:A:P	cm:i:17253	s1:i:172795	s2:i:364	dv:f:0.0001	rl:i:0
scaffold_122	75050	16	75038	-	scaffold_1	4326744	4097450	4116411	75022	75022	60	tp:A:P	cm:i:7542	s1:i:75022	s2:i:287	dv:f:0.0000	rl:i:0
scaffold_103	86368	1	5032	+	scaffold_1	4326744	4123156	4180767	4669	5125	60	tp:A:P	cm:i:452	s1:i:4649	s2:i:843	dv:f:0.0017	rl:i:0
scaffold_127	72534	12	72523	-	scaffold_1	4326744	4187817	4199841	72486	72514	60	tp:A:P	cm:i:7317	s1:i:72486	s2:i:347	dv:f:0.0000	rl:i:0
scaffold_12	305909	187150	196348	+	scaffold_1	4326744	4229251	4232835	9198	9198	60	tp:A:P	cm:i:924	s1:i:9198	s2:i:238	dv:f:0.0001	rl:i:0
scaffold_119	76326	17	76320	+	scaffold_1	4326744	4233160	4261261	76173	76371	60	tp:A:P	cm:i:7666	s1:i:76158	s2:i:438	dv:f:0.0001	rl:i:0
scaffold_137	69266	10753	13575	+	scaffold_1	4326744	4265549	4268617	2821	2823	60	tp:A:P	cm:i:266	s1:i:2821	s2:i:0	dv:f:0.0006	rl:i:38
scaffold_146	67985	13	24485	-	scaffold_1	4326744	4291033	4292732	24462	24473	60	tp:A:P	cm:i:2467	s1:i:24462	s2:i:362	dv:f:0.0001	rl:i:19
scaffold_134	69913	14	69909	+	scaffold_1	4326744	4292643	4293697	69747	69895	60	tp:A:P	cm:i:6941	s1:i:69742	s2:i:34751	dv:f:0.0001	rl:i:63
scaffold_121	75914	62262	75904	+	scaffold_1	4326744	4300513	4321326	13458	13642	60	tp:A:P	cm:i:1339	s1:i:13456	s2:i:416	dv:f:0.0009	rl:i:0
scaffold_2	613981	464509	613978	-	scaffold_10	2316625	7247	8847	149363	149474	60	tp:A:P	cm:i:15049	s1:i:149363	s2:i:1165	dv:f:0.0001	rl:i:44
scaffold_2	613981	334809	334935	-	scaffold_10	2316625	9794	10984	115	126	39	tp:A:P	cm:i:11	s1:i:115	s2:i:91	dv:f:0.0163	rl:i:44
scaffold_20	240663	5	82524	-	scaffold_10	2316625	12425	13533	82373	82520	60	tp:A:P	cm:i:8245	s1:i:82370			rl:i:0
scaffold_178	56918	13	11224	-	scaffold_10	2316625	19142	33980	11183	11211	60	tp:A:P	cm:i:1106	s1:i:11183	s2:i:621	dv:f:0.0002	rl:i:0
scaffold_182	55913	8	42069	-	scaffold_10	2316625	33806	44689	41931	42061	60	tp:A:P	cm:i:4134	s1:i:41910	s2:i:275	dv:f:0.0000	rl:i:0
scaffold_186	55193	6	5063	-	scaffold_10	2316625	44894	51572	5057	5057	60	tp:A:P	cm:i:498	s1:i:5057	s2:i:317	dv:f:0.0001	rl:i:0
scaffold_2	613981	334751	334914	+	scaffold_10	2316625	71107	72241	91	163	0	tp:A:S	cm:i:7	s1:i:91
scaffold_178	56918	11343	12596	+	scaffold_10	2316625	74385	76392	1245	1253	60	tp:A:P	cm:i:128	s1:i:1245	s2:i:234	dv:f:0.0016	rl:i:0
scaffold_179	55960	17	55951	+	scaffold_10	2316625	76506	90266	55917	55934	60	tp:A:P	cm:i:5595	s1:i:55917	s2:i:250	dv:f:0.0000	rl:i:38
scaffold_16	268789	13	268781	-	scaffold_10	2316625	91104	105257	268640	268778	60	tp:A:P	cm:i:26906	s1:i:268640	s2:i:972	dv:f:0.0000	rl:i:0
scaffold_159	61239	57209	61221	-	scaffold_10	2316625	106867	170030	3671	4012	60	tp:A:P	cm:i:355	s1:i:3641	s2:i:262	dv:f:0.0063	rl:i:0
scaffold_2	613981	73662	73734	+	scaffold_10	2316625	171025	268865	72	72	0	tp:A:S	cm:i:5	s1:i:72
scaffold_157	62665	8	62659	-	scaffold_10	2316625	274716	279841	62631	62651	60	tp:A:P	cm:i:6315	s1:i:62631	s2:i:507	dv:f:0.0000	rl:i:0
scaffold_17	259509	11	259502	+	scaffold_10	2316625	279976	315605	259454	259496	60	tp:A:P	cm:i:25822	s1:i:259454	s2:i:317	dv:f:0.0000	rl:i:0
scaffold_170	58509	2	58500	+	scaffold_10	2316625	316655	349627	58467	58500	60	tp:A:P	cm:i:5882	s1:i:58467	s2:i:326	dv:f:0.0001	rl:i:0
scaffold_156	63164	9	63161	-	scaffold_10	2316625	349539	430738	63133	63154	60	tp:A:P	cm:i:6268	s1:i:63133	s2:i:278	dv:f:0.0000	rl:i:0
scaffold_162	60542	14	60525	+	scaffold_10	2316625	431472	491677	60511	60511	60	tp:A:P	cm:i:5996	s1:i:60511	s2:i:302	dv:f:0.0000	rl:i:0
scaffold_189	54156	16	54140	-	scaffold_10	2316625	491941	497349	54069	54125	60	tp:A:P	cm:i:5384	s1:i:54069	s2:i:130	dv:f:0.0001	rl:i:0
scaffold_181	55600	8	55586	-	scaffold_10	2316625	497265	510267	55551	55583	60	tp:A:P	cm:i:5511	s1:i:55550	s2:i:261	dv:f:0.0000	rl:i:0
scaffold_169	59196	5	59187	-	scaffold_10	2316625	510306	529102	59182	59182	60	tp:A:P	cm:i:5964	s1:i:59182	s2:i:300	dv:f:0.0000	rl:i:0
scaffold_190	54120	4	54110	+	scaffold_10	2316625	528853	532572	54093	54108	60	tp:A:P	cm:i:5407	s1:i:54093	s2:i:485	dv:f:0.0000	rl:i:0
scaffold_172	57632	11	57622	+	scaffold_10	2316625	533225	563355	57542	57611	60	tp:A:P	cm:i:5658	s1:i:57542	s2:i:622	dv:f:0.0001	rl:i:19
scaffold_178	56918	13754	56905	-	scaffold_10	2316625	563262	581140	43130	43151	60	tp:A:P	cm:i:4313	s1:i:43130	s2:i:147	dv:f:0.0001	rl:i:0
scaffold_191	54097	16	54081	+	scaffold_10	2316625	580962	584678	54044	54067	60	tp:A:P	cm:i:5398	s1:i:54044	s2:i:308	dv:f:0.0000	rl:i:0
scaffold_171	57930	7	57912	+	scaffold_10	2316625	584429	759325	57838	57905	60	tp:A:P	cm:i:5784	s1:i:57838	s2:i:282	dv:f:0.0001	rl:i:0
scaffold_160	60804	14	60795	-	scaffold_10	2316625	760590	835612	60762	60790	60	tp:A:P	cm:i:5984	s1:i:60760	s2:i:298	dv:f:0.0001	rl:i:0
scaffold_2	613981	334751	334914	-	scaffold_10	2316625	836819	936121	91	163	60	tp:A:P	cm:i:7	s1:i:91	s2:i:0	dv:f:0.0497	rl:i:44
scaffold_167	59613	11	59612	+	scaffold_10	2316625	936785	951265	59573	59602	60	tp:A:P	cm:i:5962	s1:i:59573	s2:i:294	dv:f:0.0001	rl:i:0
scaffold_182	55913	42202	55895	-	scaffold_10	2316625	957730	967966	13669	13696	60	tp:A:P	cm:i:1354	s1:i:13669	s2:i:421	dv:f:0.0003	rl:i:0
scaffold_18	251868	12	251854	+	scaffold_10	2316625	971417	984668	251796	251948	60	tp:A:P	cm:i:25263	s1:i:251774	s2:i:116	dv:f:0.0000	rl:i:0
scaffold_176	56544	5	56535	+	scaffold_10	2316625	989201	1009415	56504	56531	60	tp:A:P	cm:i:5602	s1:i:56504	s2:i:117	dv:f:0.0000	rl:i:22
scaffold_195	53650	11	53645	-	scaffold_10	2316625	1011426	1013911	53506	53638	60	tp:A:P	cm:i:5380	s1:i:53501	s2:i:369	dv:f:0.0002	rl:i:0
scaffold_180	55669	12	55667	-	scaffold_10	2316625	1016173	1029504	55655	55655	60	tp:A:P	cm:i:5638	s1:i:55655	s2:i:129	dv:f:0.0000	rl:i:0
scaffold_197	53518	1	53501	-	scaffold_10	2316625	1029605	1031952	53331	53505	60	tp:A:P	cm:i:5350	s1:i:53328	s2:i:39722	dv:f:0.0003	rl:i:36
scaffold_163	60455	7	60443	-	scaffold_10	2316625	1034130	1088238	60436	60436	60	tp:A:P	cm:i:6064	s1:i:60436	s2:i:318	dv:f:0.0000	rl:i:0
scaffold_19	249517	6	249510	+	scaffold_10	2316625	1088939	1093610	249322	249513	60	tp:A:P	cm:i:24893	s1:i:249322	s2:i:441	dv:f:0.0001	rl:i:0
scaffold_199	53021	9	53018	-	scaffold_10	2316625	1109558	1219747	52673	53441	60	tp:A:P	cm:i:5238	s1:i:52588	s2:i:761	dv:f:0.0003	rl:i:0
scaffold_188	54248	2	54241	-	scaffold_10	2316625	1226296	1231807	54216	54243	60	tp:A:P	cm:i:5467	s1:i:54215	s2:i:283	dv:f:0.0000	rl:i:0
scaffold_198	53113	23538	53108	+	scaffold_10	2316625	1254036	1364437	29159	29588	60	tp:A:P	cm:i:2930	s1:i:29156	s2:i:811	dv:f:0.0009	rl:i:0
scaffold_187	54947	3	2409	-	scaffold_10	2316625	1364960	1371185	2406	2406	60	tp:A:P	cm:i:236	s1:i:2406	s2:i:306	dv:f:0.0002	rl:i:0
scaffold_2	613981	334983	351599	+	scaffold_10	2316625	1375493	1376689	15234	16641	60	tp:A:P	cm:i:1512	s1:i:15222	s2:i:4812	dv:f:0.0055	rl:i:44
scaffold_194	53850	12	53839	-	scaffold_10	2316625	1376845	1379340	53822	53828	60	tp:A:P	cm:i:5366	s1:i:53822	s2:i:292	dv:f:0.0000	rl:i:0
scaffold_187	54947	2536	54945	-	scaffold_10	2316625	1379973	1386459	52373	52565	60	tp:A:P	cm:i:5286	s1:i:52339	s2:i:747	dv:f:0.0001	rl:i:0
scaffold_159	61239	7	58438	+	scaffold_10	2316625	1386994	1388881	58309	58463	60	tp:A:P	cm:i:5834	s1:i:58282	s2:i:242	dv:f:0.0002	rl:i:0
scaffold_192	53924	1	53912	-	scaffold_10	2316625	1395510	1399037	53893	53911	60	tp:A:P	cm:i:5351	s1:i:53893	s2:i:423	dv:f:0.0000	rl:i:0
scaffold_198	53113	11	26529	-	scaffold_10	2316625	1401282	1403221	24862	26521	60	tp:A:P	cm:i:2418	s1:i:24860	s2:i:1056	dv:f:0.0039	rl:i:0
scaffold_184	55431	13	55423	-	scaffold_10	2316625	1410536	1414167	55386	55415	60	tp:A:P	cm:i:5476	s1:i:55385	s2:i:429	dv:f:0.0000	rl:i:0
scaffold_2	613981	461642	464370	+	scaffold_10	2316625	1414032	1415221	2728	2728	60	tp:A:P	cm:i:275	s1:i:2728	s2:i:251	dv:f:0.0004	rl:i:44
scaffold_2	613981	16	74700	+	scaffold_10	2316625	1415501	1416776	73269	74684	60	tp:A:P	cm:i:7301	s1:i:73269	s2:i:217	dv:f:0.0001	rl:i:44
scaffold_183	55439	10	55438	+	scaffold_10	2316625	1430743	1436350	55417	55428	60	tp:A:P	cm:i:5604	s1:i:55417	s2:i:317	dv:f:0.0000	rl:i:0
scaffold_185	54892	16	54891	+	scaffold_10	2316625	1436296	1437897	54860	54875	60	tp:A:P	cm:i:5456	s1:i:54860	s2:i:254	dv:f:0.0000	rl:i:0
scaffold_2	613981	74724	275973	+	scaffold_10	2316625	1440101	1441989	200764	201744	60	tp:A:P	cm:i:20264	s1:i:200665	s2:i:237	dv:f:0.0000	rl:i:44
scaffold_158	61591	3	61587	-	scaffold_10	2316625	1444442	1523953	61548	61584	60	tp:A:P	cm:i:6190	s1:i:61548	s2:i:367	dv:f:0.0000	rl:i:19
scaffold_166	59650	18	59640	+	scaffold_10	2316625	1523714	1569686	59540	59632	60	tp:A:P	cm:i:5949	s1:i:59536	s2:i:1599	dv:f:0.0001	rl:i:0
scaffold_2	613981	275721	334420	+	scaffold_10	2316625	1570243	1571472	58686	58699	60	tp:A:P	cm:i:5870	s1:i:58686	s2:i:771	dv:f:0.0001	rl:i:44
scaffold_161	61100	18	61082	+	scaffold_10	2316625	1575201	1620638	60471	61069	60	tp:A:P	cm:i:6027	s1:i:60380	s2:i:1339	dv:f:0.0005	rl:i:0
scaffold_20	240663	109171	240661	-	scaffold_10	2316625	1623664	1624775	131212	131492	60	tp:A:P	cm:i:13092	s1:i:131210			rl:i:0
scaffold_175	56993	2	56977	-	scaffold_10	2316625	1629130	1650150	56975	56975	60	tp:A:P	cm:i:5717	s1:i:56975	s2:i:326	dv:f:0.0000	rl:i:0
scaffold_2	613981	351723	461496	-	scaffold_10	2316625	1691900	1693419	109730	109774	60	tp:A:P	cm:i:10912	s1:i:109727	s2:i:251	dv:f:0.0000	rl:i:44
scaffold_178	56918	12702	13901	+	scaffold_10	2316625	1698216	1854023	1143	1199	60	tp:A:P	cm:i:113	s1:i:1143	s2:i:296	dv:f:0.0057	rl:i:0
scaffold_164	60320	16	60306	-	scaffold_10	2316625	1860686	1912330	60276	60290	60	tp:A:P	cm:i:6066	s1:i:60276	s2:i:325	dv:f:0.0000	rl:i:0
scaffold_173	57156	0	57142	+	scaffold_10	2316625	1912362	2040372	57099	57147	60	tp:A:P	cm:i:5699	s1:i:57099	s2:i:226	dv:f:0.0001	rl:i:25
scaffold_165	60224	5	60206	-	scaffold_10	2316625	2040054	2090189	60171	60206	60	tp:A:P	cm:i:5961	s1:i:60171	s2:i:271	dv:f:0.0001	rl:i:0
scaffold_196	53618	13	53605	+	scaffold_10	2316625	2090236	2092683	53538	53593	60	tp:A:P	cm:i:5287	s1:i:53538	s2:i:283	dv:f:0.0001	rl:i:0
scaffold_177	56395	13	56391	-	scaffold_10	2316625	2093141	2111808	55753	56429	60	tp:A:P	cm:i:5666	s1:i:55701	s2:i:1471	dv:f:0.0002	rl:i:0
scaffold_168	59351	13	59337	+	scaffold_10	2316625	2111906	2138181	59300	59325	60	tp:A:P	cm:i:5929	s1:i:59300	s2:i:298	dv:f:0.0000	rl:i:0
scaffold_186	55193	5200	38200	+	scaffold_10	2316625	2137763	2236561	32964	33000	60	tp:A:P	cm:i:3355	s1:i:32964	s2:i:179	dv:f:0.0001	rl:i:0
scaffold_186	55193	37855	55094	-	scaffold_10	2316625	2235522	2272424	16945	17239	60	tp:A:P	cm:i:1688	s1:i:16945	s2:i:397	dv:f:0.0011	rl:i:0
scaffold_193	53853	13	53843	-	scaffold_10	2316625	2270542	2273308	53830	53830	60	tp:A:P	cm:i:5418	s1:i:53830	s2:i:294	dv:f:0.0000	rl:i:0
scaffold_174	57061	11	57055	+	scaffold_10	2316625	2284366	2313371	57031	57047	60	tp:A:P	cm:i:5696	s1:i:57031	s2:i:329	dv:f:0.0001	rl:i:0
scaffold_22	226899	31208	45636	+	scaffold_11	2197563	1719	24654	13702	14480	60	tp:A:P	cm:i:1387	s1:i:13691			rl:i:0
scaffold_269	37636	23888	37628	+	scaffold_11	2197563	24719	25823	13637	13740	60	tp:A:P	cm:i:1363	s1:i:13637			rl:i:0
scaffold_255	40148	6	21431	-	scaffold_11	2197563	27632	29919	21425	21425	60	tp:A:P	cm:i:2097	s1:i:21425			rl:i:0
scaffold_256	39865	39800	39854	-	scaffold_11	2197563	30035	31720	54	54	0	tp:A:S	cm:i:4	s1:i:54
scaffold_263	39348	12	39330	-	scaffold_11	2197563	39294	40473	33286	39857	60	tp:A:P	cm:i:3357	s1:i:33093			rl:i:22
scaffold_232	43226	12	43226	-	scaffold_11	2197563	48538	57768	43214	43214	60	tp:A:P	cm:i:4328	s1:i:43214			rl:i:0
scaffold_207	50675	4	50659	+	scaffold_11	2197563	58007	107626	50655	50727	60	tp:A:P	cm:i:5055	s1:i:50639			rl:i:0
scaffold_226	44492	14	44474	+	scaffold_11	2197563	108136	257011	44364	44461	60	tp:A:P	cm:i:4427	s1:i:44364			rl:i:0
scaffold_202	52698	1	52680	+	scaffold_11	2197563	256698	313842	52529	52679	60	tp:A:P	cm:i:5253	s1:i:52520			rl:i:38
scaffold_209	51612	3721	7096	+	scaffold_11	2197563	314325	350995	3134	3375	60	tp:A:P	cm:i:313	s1:i:3134			rl:i:0
scaffold_230	43284	5	43273	-	scaffold_11	2197563	351163	362120	43257	43268	60	tp:A:P	cm:i:4289	s1:i:43257			rl:i:38
scaffold_20	240663	82654	112607	+	scaffold_11	2197563	362164	446133	27169	29990	60	tp:A:P	cm:i:2658	s1:i:27159			rl:i:0
scaffold_267	37982	4	37964	+	scaffold_11	2197563	458297	458409	37463	37961	60	tp:A:P	cm:i:3713	s1:i:37418			rl:i:0
scaffold_256	39865	10	39776	-	scaffold_11	2197563	459804	461637	39686	39786	60	tp:A:P	cm:i:3935	s1:i:39680			rl:i:46
scaffold_212	48623	11	48611	+	scaffold_11	2197563	462162	494811	48598	48601	60	tp:A:P	cm:i:4843	s1:i:48598			rl:i:0
scaffold_235	44061	0	5635	-	scaffold_11	2197563	496715	504890	5611	5638	60	tp:A:P	cm:i:551	s1:i:5611			rl:i:0
scaffold_220	50767	17	2433	+	scaffold_11	2197563	505913	527491	2416	2416	60	tp:A:P	cm:i:240	s1:i:2416			rl:i:0
scaffold_235	44061	5750	44061	+	scaffold_11	2197563	527531	535901	38299	38311	60	tp:A:P	cm:i:3821	s1:i:38297			rl:i:0
scaffold_218	47366	9	47364	+	scaffold_11	2197563	535488	562441	47354	47355	60	tp:A:P	cm:i:4764	s1:i:47354			rl:i:38
scaffold_245	41555	22758	41554	+	scaffold_11	2197563	562451	567070	18796	18796	60	tp:A:P	cm:i:1853	s1:i:18796			rl:i:0
scaffold_246	41229	3	41213	+	scaffold_11	2197563	568877	573496	41208	41211	60	tp:A:P	cm:i:4139	s1:i:41208			rl:i:0
scaffold_217	47634	17	47628	-	scaffold_11	2197563	573489	602873	47496	47619	60	tp:A:P	cm:i:4740	s1:i:47494			rl:i:0
scaffold_265	37811	3	37793	+	scaffold_11	2197563	607896	608034	37790	37790	60	tp:A:P	cm:i:3748	s1:i:37790			rl:i:0
scaffold_213	48432	16	48416	-	scaffold_11	2197563	614977	645906	48378	48403	60	tp:A:P	cm:i:4873	s1:i:48378			rl:i:0
scaffold_261	39402	18	39396	+	scaffold_11	2197563	645691	646920	39364	39378	60	tp:A:P	cm:i:3975	s1:i:39364			rl:i:0
scaffold_224	45673	26800	45670	+	scaffold_11	2197563	650645	666034	18864	18870	60	tp:A:P	cm:i:1933	s1:i:18864			rl:i:50
scaffold_241	41933	12	41932	+	scaffold_11	2197563	668153	668969	41920	41920	60	tp:A:P	cm:i:4201	s1:i:41920			rl:i:0
scaffold_233	43147	11	43144	+	scaffold_11	2197563	673840	683214	43107	43133	60	tp:A:P	cm:i:4281	s1:i:43107			rl:i:0
scaffold_240	42085	12	42029	+	scaffold_11	2197563	686601	693282	41970	42019	60	tp:A:P	cm:i:4256	s1:i:41969			rl:i:0
scaffold_269	37636	9947	25012	-	scaffold_11	2197563	693405	694478	15061	15067	60	tp:A:P	cm:i:1514	s1:i:15061			rl:i:0
scaffold_245	41555	2	23498	-	scaffold_11	2197563	709559	714674	22889	23496	60	tp:A:P	cm:i:2289	s1:i:22816			rl:i:0
scaffold_228	43785	8	43775	+	scaffold_11	2197563	714565	726701	43767	43772	60	tp:A:P	cm:i:4435	s1:i:43766			rl:i:0
scaffold_256	39865	39800	39854	-	scaffold_11	2197563	726751	728581	54	54	0	tp:A:P	cm:i:4	s1:i:54			rl:i:46
scaffold_208	50147	3	50138	-	scaffold_11	2197563	729345	767647	50135	50135	60	tp:A:P	cm:i:4991	s1:i:50135			rl:i:0
scaffold_221	45657	14	45650	+	scaffold_11	2197563	767664	787828	45629	45636	60	tp:A:P	cm:i:4544	s1:i:45629			rl:i:0
scaffold_222	46224	26512	46212	+	scaffold_11	2197563	787730	807119	19681	19700	60	tp:A:P	cm:i:1981	s1:i:19681			rl:i:0
scaffold_200	52603	11	52596	-	scaffold_11	2197563	807193	880260	52544	52587	60	tp:A:P	cm:i:5221	s1:i:52544			rl:i:0
scaffold_25	212268	67708	212264	-	scaffold_11	2197563	880312	883185	144424	144563	60	tp:A:P	cm:i:14500	s1:i:144420			rl:i:0
scaffold_258	39536	14	39521	+	scaffold_11	2197563	883426	884946	39491	39508	60	tp:A:P	cm:i:3907	s1:i:39491			rl:i:0
scaffold_225	45177	5	45176	-	scaffold_11	2197563	895126	909520	45171	45171	60	tp:A:P	cm:i:4524	s1:i:45171			rl:i:0
scaffold_229	43707	16	43690	-	scaffold_11	2197563	910666	921939	42141	43674	60	tp:A:P	cm:i:4188	s1:i:42055			rl:i:0
scaffold_222	46224	2	26390	-	scaffold_11	2197563	930868	950348	26242	26388	60	tp:A:P	cm:i:2635	s1:i:26218			rl:i:0
scaffold_234	43053	5	43040	-	scaffold_11	2197563	950399	959017	43006	43040	60	tp:A:P	cm:i:4317	s1:i:43005			rl:i:0
scaffold_23	219530	13	219526	-	scaffold_11	2197563	966289	977441	219510	219513	60	tp:A:P	cm:i:21852	s1:i:219510			rl:i:0
scaffold_223	45575	10	45574	-	scaffold_11	2197563	981771	1000660	45553	45570	60	tp:A:P	cm:i:4595	s1:i:45552			rl:i:0
scaffold_201	57899	51095	57885	+	scaffold_11	2197563	1015785	1075385	6561	6790	60	tp:A:P	cm:i:641	s1:i:6561			rl:i:0
scaffold_227	43880	1	43868	-	scaffold_11	2197563	1075329	1089840	43847	43867	60	tp:A:P	cm:i:4372	s1:i:43847			rl:i:0
scaffold_214	48386	1	48371	-	scaffold_11	2197563	1090661	1121532	48306	48374	60	tp:A:P	cm:i:4820	s1:i:48306			rl:i:0
scaffold_243	41861	4	41861	+	scaffold_11	2197563	1128911	1135221	41736	41867	60	tp:A:P	cm:i:4152	s1:i:41732			rl:i:0
scaffold_236	42890	9	42886	+	scaffold_11	2197563	1149567	1157538	42877	42877	60	tp:A:P	cm:i:4261	s1:i:42877			rl:i:0
scaffold_255	40148	21565	40132	+	scaffold_11	2197563	1158154	1160327	18545	18570	60	tp:A:P	cm:i:1846	s1:i:18545			rl:i:0
scaffold_251	40648	7	40632	+	scaffold_11	2197563	1161480	1163992	40599	40629	60	tp:A:P	cm:i:4048	s1:i:40597			rl:i:0
scaffold_254	40197	10	40189	-	scaffold_11	2197563	1168416	1170792	40165	40179	60	tp:A:P	cm:i:3981	s1:i:40165			rl:i:0
scaffold_239	47813	14694	47798	+	scaffold_11	2197563	1172715	1179877	33055	33105	60	tp:A:P	cm:i:3304	s1:i:33052			rl:i:0
scaffold_268	37573	12	37570	+	scaffold_11	2197563	1180149	1181203	37558	37558	60	tp:A:P	cm:i:3743	s1:i:37558			rl:i:0
scaffold_244	41501	11	41500	-	scaffold_11	2197563	1183301	1186421	41469	41489	60	tp:A:P	cm:i:4145	s1:i:41469			rl:i:0
scaffold_266	37811	18	37796	+	scaffold_11	2197563	1197246	1197384	37778	37779	60	tp:A:P	cm:i:3822	s1:i:37778			rl:i:0
scaffold_252	40645	4	40628	-	scaffold_11	2197563	1207276	1322039	40597	40628	60	tp:A:P	cm:i:4075	s1:i:40597			rl:i:0
scaffold_206	50995	1	50978	+	scaffold_11	2197563	1329602	1329674	50809	50980	60	tp:A:P	cm:i:5061	s1:i:50807			rl:i:0
scaffold_203	52442	15	52429	-	scaffold_11	2197563	1329640	1531378	52367	52415	60	tp:A:P	cm:i:5243	s1:i:52367			rl:i:19
scaffold_26	210678	17	210662	-	scaffold_11	2197563	1531126	1532530	210529	210651	60	tp:A:P	cm:i:20963	s1:i:210529			rl:i:0
scaffold_215	48146	18	48146	+	scaffold_11	2197563	1532617	1562526	48105	48128	60	tp:A:P	cm:i:4754	s1:i:48105			rl:i:0
scaffold_210	49625	3	49620	+	scaffold_11	2197563	1563632	1599014	49498	49619	60	tp:A:P	cm:i:4983	s1:i:49498			rl:i:0
scaffold_22	226899	1	31183	-	scaffold_11	2197563	1598718	1624525	31175	31182	60	tp:A:P	cm:i:3145	s1:i:31175			rl:i:0
scaffold_262	39136	14	39133	+	scaffold_11	2197563	1624640	1625847	39005	39120	60	tp:A:P	cm:i:3903	s1:i:39005			rl:i:0
scaffold_204	51649	16	51644	-	scaffold_11	2197563	1625506	1684205	51558	51653	60	tp:A:P	cm:i:5162	s1:i:51550			rl:i:0
scaffold_205	51582	8	51569	-	scaffold_11	2197563	1682510	1699112	51453	51565	60	tp:A:P	cm:i:5191	s1:i:51452			rl:i:19
scaffold_201	57899	1	49010	+	scaffold_11	2197563	1699540	1771286	48382	49012	60	tp:A:P	cm:i:4843	s1:i:48379			rl:i:0
scaffold_211	48837	3	45637	+	scaffold_11	2197563	1771024	1804027	44636	45656	0	tp:A:S	cm:i:4377	s1:i:44636
scaffold_269	37636	18	9816	+	scaffold_11	2197563	1805690	1806683	9573	9798	60	tp:A:P	cm:i:992	s1:i:9573			rl:i:0
scaffold_260	39395	17	39380	+	scaffold_11	2197563	1806699	1808075	39363	39363	60	tp:A:P	cm:i:3955	s1:i:39363			rl:i:0
scaffold_259	39484	17	39476	-	scaffold_11	2197563	1808516	1809961	39459	39459	60	tp:A:P	cm:i:3949	s1:i:39459			rl:i:0
scaffold_209	51612	10	5579	-	scaffold_11	2197563	1811222	1851698	5287	5569	60	tp:A:P	cm:i:542	s1:i:5287			rl:i:0
scaffold_237	42505	6	42505	+	scaffold_11	2197563	1852035	1859880	42408	42504	60	tp:A:P	cm:i:4282	s1:i:42408			rl:i:0
scaffold_216	47654	8	47642	-	scaffold_11	2197563	1866485	1896281	47634	47634	60	tp:A:P	cm:i:4736	s1:i:47634			rl:i:0
scaffold_209	51612	7232	51610	-	scaffold_11	2197563	1896375	1936997	44256	44378	60	tp:A:P	cm:i:4449	s1:i:44256			rl:i:0
scaffold_239	47813	4	12586	-	scaffold_11	2197563	1937167	1944418	12536	12582	60	tp:A:P	cm:i:1261	s1:i:12536			rl:i:0
scaffold_211	48837	3	48835	-	scaffold_11	2197563	1944336	1978680	48662	48837	35	tp:A:P	cm:i:4830	s1:i:48661			rl:i:0
scaffold_247	41162	11	41147	-	scaffold_11	2197563	1984329	1988528	41113	41136	60	tp:A:P	cm:i:4091	s1:i:41113			rl:i:0
scaffold_224	45673	13	26996	+	scaffold_11	2197563	1994771	2013143	25879	27020	60	tp:A:P	cm:i:2553	s1:i:25870			rl:i:50
scaffold_22	226899	45766	226895	-	scaffold_11	2197563	2014930	2040774	181044	181134	60	tp:A:P	cm:i:18232	s1:i:181040			rl:i:0
scaffold_264	38089	12	38076	-	scaffold_11	2197563	2045075	2045211	38042	38064	60	tp:A:P	cm:i:3784	s1:i:38042			rl:i:0
scaffold_250	40634	1	40624	-	scaffold_11	2197563	2046641	2049232	40548	40624	60	tp:A:P	cm:i:4089	s1:i:40548			rl:i:0
scaffold_231	43245	11	43236	-	scaffold_11	2197563	2049190	2059717	43225	43225	60	tp:A:P	cm:i:4340	s1:i:43225			rl:i:0
scaffold_25	212268	0	67591	-	scaffold_11	2197563	2059479	2062304	67584	67592	60	tp:A:P	cm:i:6736	s1:i:67584			rl:i:0
scaffold_257	39857	3	39853	+	scaffold_11	2197563	2062316	2063845	39826	39850	60	tp:A:P	cm:i:4013	s1:i:39826			rl:i:0
scaffold_220	50767	4526	50766	-	scaffold_11	2197563	2063547	2086359	46219	46240	60	tp:A:P	cm:i:4593	s1:i:46219			rl:i:0
scaffold_24	212461	11	212456	+	scaffold_11	2197563	2086036	2092675	212369	212449	60	tp:A:P	cm:i:21202	s1:i:212368			rl:i:0
scaffold_21	234654	5	234650	-	scaffold_11	2197563	2099352	2135699	234600	234646	60	tp:A:P	cm:i:23501	s1:i:234600			rl:i:0
scaffold_219	45988	9	45981	-	scaffold_11	2197563	2135825	2162758	45972	45972	60	tp:A:P	cm:i:4578	s1:i:45972			rl:i:0
scaffold_263	39348	26564	27881	+	scaffold_11	2197563	2162686	2163812	1275	1317	60	tp:A:P	cm:i:126	s1:i:1275			rl:i:22
scaffold_238	42391	10	42386	+	scaffold_11	2197563	2164051	2171417	42374	42430	60	tp:A:P	cm:i:4235	s1:i:42362			rl:i:0
scaffold_242	41918	17	41914	-	scaffold_11	2197563	2178062	2184536	41877	41897	60	tp:A:P	cm:i:4140	s1:i:41877			rl:i:0
scaffold_256	39865	39800	39854	-	scaffold_11	2197563	2186613	2188240	54	54	0	tp:A:S	cm:i:4	s1:i:54
scaffold_249	40742	12	40731	-	scaffold_11	2197563	2188151	2189204	40719	40719	60	tp:A:P	cm:i:4041	s1:i:40719			rl:i:0
scaffold_248	41000	11	40992	-	scaffold_11	2197563	2189129	2191663	40953	40981	60	tp:A:P	cm:i:4174	s1:i:40953			rl:i:0
scaffold_253	40490	5	40482	+	scaffold_11	2197563	2193509	2195901	40441	40479	60	tp:A:P	cm:i:4072	s1:i:40441			rl:i:0
scaffold_329	26659	1	26649	+	scaffold_12	2176702	482	2139	26291	26656	60	tp:A:P	cm:i:2666	s1:i:26290			rl:i:0
scaffold_272	36530	8	36522	+	scaffold_12	2176702	4506	72197	36497	36516	60	tp:A:P	cm:i:3687	s1:i:36497			rl:i:0
scaffold_290	33205	18	33196	-	scaffold_12	2176702	72652	84106	33178	33178	60	tp:A:P	cm:i:3322	s1:i:33178			rl:i:0
scaffold_31	171966	127425	171950	+	scaffold_12	2176702	84561	88559	44349	44525	5	tp:A:P	cm:i:4458	s1:i:44349			rl:i:19
scaffold_287	33349	18	33341	-	scaffold_12	2176702	89250	106661	33323	33323	60	tp:A:P	cm:i:3295	s1:i:33323			rl:i:0
scaffold_342	25006	2	24993	-	scaffold_12	2176702	106879	107993	24958	24991	60	tp:A:P	cm:i:2491	s1:i:24958			rl:i:0
scaffold_341	25202	3	25194	+	scaffold_12	2176702	110006	111120	25191	25191	60	tp:A:P	cm:i:2557	s1:i:25191			rl:i:0
scaffold_27	195323	3	195319	+	scaffold_12	2176702	111338	194132	195197	195324	60	tp:A:P	cm:i:19560	s1:i:195178			rl:i:0
scaffold_322	28114	14	28105	+	scaffold_12	2176702	201838	204099	28061	28095	60	tp:A:P	cm:i:2831	s1:i:28061			rl:i:0
scaffold_281	34611	8	34601	+	scaffold_12	2176702	205391	231624	34534	34759	60	tp:A:P	cm:i:3469	s1:i:34500			rl:i:0
scaffold_273	36267	9	36261	-	scaffold_12	2176702	237550	292965	36232	36252	60	tp:A:P	cm:i:3622	s1:i:36232			rl:i:0
scaffold_337	25556	15	25542	+	scaffold_12	2176702	301674	302958	25515	25527	60	tp:A:P	cm:i:2511	s1:i:25515			rl:i:0
scaffold_318	28962	0	28956	-	scaffold_12	2176702	310401	313116	28945	28958	60	tp:A:P	cm:i:2896	s1:i:28945			rl:i:0
scaffold_304	30941	6	30939	+	scaffold_12	2176702	314986	320448	30845	30936	60	tp:A:P	cm:i:3094	s1:i:30844			rl:i:0
scaffold_309	30159	16	30146	+	scaffold_12	2176702	320215	324536	30130	30130	60	tp:A:P	cm:i:2982	s1:i:30130			rl:i:0
scaffold_307	30296	13	30291	-	scaffold_12	2176702	326137	331908	30227	30278	60	tp:A:P	cm:i:3038	s1:i:30224			rl:i:0
scaffold_321	28220	14	28210	-	scaffold_12	2176702	331879	334147	28186	28199	60	tp:A:P	cm:i:2812	s1:i:28184			rl:i:0
scaffold_34	171516	167918	171502	-	scaffold_12	2176702	335869	337075	3564	3584	60	tp:A:P	cm:i:353	s1:i:3564			rl:i:0
scaffold_276	36291	8	36291	+	scaffold_12	2176702	337508	339924	36283	36283	60	tp:A:P	cm:i:3606	s1:i:36283			rl:i:0
scaffold_275	40713	36090	40710	-	scaffold_12	2176702	346694	392934	4620	4620	60	tp:A:P	cm:i:461	s1:i:4620			rl:i:0
scaffold_34	171516	3	167791	+	scaffold_12	2176702	393043	394268	167725	167801	60	tp:A:P	cm:i:16870	s1:i:167723			rl:i:0
scaffold_314	29417	15	29399	-	scaffold_12	2176702	394412	398309	29384	29384	60	tp:A:P	cm:i:2964	s1:i:29384			rl:i:0
scaffold_270	36698	16	36694	-	scaffold_12	2176702	399115	475485	36664	36678	60	tp:A:P	cm:i:3701	s1:i:36662			rl:i:0
scaffold_278	35657	14	35643	-	scaffold_12	2176702	475801	520262	35602	35629	60	tp:A:P	cm:i:3572	s1:i:35602			rl:i:0
scaffold_274	36379	17	36362	-	scaffold_12	2176702	521207	576082	36326	36347	60	tp:A:P	cm:i:3697	s1:i:36326			rl:i:0
scaffold_319	28674	11	28664	+	scaffold_12	2176702	576147	578745	28651	28656	60	tp:A:P	cm:i:2864	s1:i:28651			rl:i:19
scaffold_292	32962	4	22210	-	scaffold_12	2176702	579821	590489	22005	22206	60	tp:A:P	cm:i:2150	s1:i:21969			rl:i:0
scaffold_30	177661	18	177660	-	scaffold_12	2176702	590548	597398	174725	177643	60	tp:A:P	cm:i:17533	s1:i:174697			rl:i:0
scaffold_293	32981	2	32974	-	scaffold_12	2176702	603647	612962	32838	32972	60	tp:A:P	cm:i:3278	s1:i:32838			rl:i:0
scaffold_291	33008	3	33006	+	scaffold_12	2176702	621242	632366	33003	33003	60	tp:A:P	cm:i:3297	s1:i:33003			rl:i:0
scaffold_302	31211	10	31201	-	scaffold_12	2176702	633102	638826	31191	31191	60	tp:A:P	cm:i:3103	s1:i:31191			rl:i:0
scaffold_297	32432	18	32432	+	scaffold_12	2176702	639231	640930	32212	32415	60	tp:A:P	cm:i:3174	s1:i:32205			rl:i:0
scaffold_334	25910	0	25897	-	scaffold_12	2176702	640625	642038	25897	25897	60	tp:A:P	cm:i:2583	s1:i:25897			rl:i:0
scaffold_333	26079	1	26072	+	scaffold_12	2176702	642158	643594	25399	26076	60	tp:A:P	cm:i:2543	s1:i:25396			rl:i:0
scaffold_286	33975	11	33959	-	scaffold_12	2176702	644075	662088	33937	33948	60	tp:A:P	cm:i:3419	s1:i:33937			rl:i:0
scaffold_32	171540	4	171537	-	scaffold_12	2176702	665741	668238	171510	171533	60	tp:A:P	cm:i:17155	s1:i:171510			rl:i:0
scaffold_295	32665	11	32660	+	scaffold_12	2176702	668400	676790	32645	32649	60	tp:A:P	cm:i:3191	s1:i:32645			rl:i:0
scaffold_339	25361	15	25352	-	scaffold_12	2176702	676805	678094	25317	25339	60	tp:A:P	cm:i:2489	s1:i:25317			rl:i:38
scaffold_294	32610	0	4349	+	scaffold_12	2176702	677896	686328	4349	4349	60	tp:A:P	cm:i:449	s1:i:4349			rl:i:0
scaffold_326	26939	2	26937	-	scaffold_12	2176702	686141	687939	26935	26947	60	tp:A:P	cm:i:2714	s1:i:26933			rl:i:0
scaffold_303	31201	11	31188	-	scaffold_12	2176702	694318	823964	31095	31180	60	tp:A:P	cm:i:3135	s1:i:31095			rl:i:0
scaffold_275	40713	17	33988	+	scaffold_12	2176702	824109	1073620	33885	33971	60	tp:A:P	cm:i:3381	s1:i:33885			rl:i:0
scaffold_332	26269	4	26267	-	scaffold_12	2176702	1074996	1178819	25951	26269	60	tp:A:P	cm:i:2604	s1:i:25942			rl:i:0
scaffold_31	171966	13	128038	+	scaffold_12	2176702	1178514	1182649	127862	128026	60	tp:A:P	cm:i:12674	s1:i:127859			rl:i:19
scaffold_331	26649	1	26631	-	scaffold_12	2176702	1182750	1184287	26630	26640	60	tp:A:P	cm:i:2697	s1:i:26628			rl:i:0
scaffold_31	171966	127425	171481	+	scaffold_12	2176702	1184648	1188640	43820	44062	0	tp:A:S	cm:i:4405	s1:i:43820
scaffold_336	25830	2	25818	+	scaffold_12	2176702	1188565	1189993	25751	25818	60	tp:A:P	cm:i:2629	s1:i:25748			rl:i:0
scaffold_346	24755	5	19803	+	scaffold_12	2176702	1190093	1191103	19798	19798	60	tp:A:P	cm:i:1945	s1:i:19798			rl:i:0
scaffold_320	28530	6	28522	-	scaffold_12	2176702	1192332	1194667	28502	28516	60	tp:A:P	cm:i:2853	s1:i:28502			rl:i:0
scaffold_325	26967	11	26965	-	scaffold_12	2176702	1195436	1197303	26933	26954	60	tp:A:P	cm:i:2700	s1:i:26933			rl:i:0
scaffold_317	29018	11	29017	-	scaffold_12	2176702	1205146	1208060	28926	29006	60	tp:A:P	cm:i:2921	s1:i:28926			rl:i:0
scaffold_338	25400	15	25400	-	scaffold_12	2176702	1208055	1209437	25379	25385	60	tp:A:P	cm:i:2539	s1:i:25379			rl:i:0
scaffold_344	24934	10	24925	-	scaffold_12	2176702	1215212	1216234	24909	24915	60	tp:A:P	cm:i:2478	s1:i:24909			rl:i:0
scaffold_327	26947	12	26945	-	scaffold_12	2176702	1216215	1218007	26933	26933	60	tp:A:P	cm:i:2682	s1:i:26933			rl:i:0
scaffold_328	26855	12	26847	-	scaffold_12	2176702	1225106	1226897	26776	26843	60	tp:A:P	cm:i:2668	s1:i:26774			rl:i:0
scaffold_315	29405	9	29400	+	scaffold_12	2176702	1226816	1230238	29391	29391	60	tp:A:P	cm:i:2881	s1:i:29391			rl:i:0
scaffold_340	25197	9	25183	+	scaffold_12	2176702	1236348	1237542	25132	25174	60	tp:A:P	cm:i:2513	s1:i:25132			rl:i:57
scaffold_299	33319	4	6832	-	scaffold_12	2176702	1237489	1244771	6708	6828	60	tp:A:P	cm:i:654	s1:i:6708			rl:i:57
scaffold_301	31469	16	31453	+	scaffold_12	2176702	1249201	1252019	31363	31439	60	tp:A:P	cm:i:3125	s1:i:31360			rl:i:34
scaffold_296	32558	13	32551	+	scaffold_12	2176702	1256427	1264474	32495	32539	60	tp:A:P	cm:i:3252	s1:i:32495			rl:i:0
scaffold_33	171403	16	171390	-	scaffold_12	2176702	1270035	1271667	171327	171377	60	tp:A:P	cm:i:17092	s1:i:171327			rl:i:0
scaffold_285	34162	0	34150	+	scaffold_12	2176702	1274650	1292895	34066	34150	60	tp:A:P	cm:i:3357	s1:i:34066			rl:i:0
scaffold_308	30643	0	30639	-	scaffold_12	2176702	1293072	1297441	27077	30645	60	tp:A:P	cm:i:2730	s1:i:26885			rl:i:0
scaffold_29	191497	5	191493	+	scaffold_12	2176702	1298514	1449106	191416	191492	60	tp:A:P	cm:i:19155	s1:i:191416			rl:i:19
scaffold_277	36012	14	35995	+	scaffold_12	2176702	1448685	1468384	35923	35981	60	tp:A:P	cm:i:3592	s1:i:35921			rl:i:0
scaffold_335	25873	14	25859	-	scaffold_12	2176702	1468589	1570955	25792	25845	60	tp:A:P	cm:i:2573	s1:i:25792			rl:i:0
scaffold_305	30903	9	30880	+	scaffold_12	2176702	1572165	1575728	30869	30871	60	tp:A:P	cm:i:3108	s1:i:30869			rl:i:38
scaffold_306	30852	8	30839	+	scaffold_12	2176702	1576224	1578876	30816	30831	60	tp:A:P	cm:i:3137	s1:i:30816			rl:i:0
scaffold_311	29816	16	29812	-	scaffold_12	2176702	1579484	1580529	29796	29796	60	tp:A:P	cm:i:2980	s1:i:29796			rl:i:0
scaffold_312	29737	5	29725	-	scaffold_12	2176702	1580655	1581495	29624	29728	60	tp:A:P	cm:i:2949	s1:i:29623			rl:i:0
scaffold_28	197660	17690	197660	+	scaffold_12	2176702	1581542	1582859	179947	179972	60	tp:A:P	cm:i:18108	s1:i:179947			rl:i:0
scaffold_292	32962	20762	32951	+	scaffold_12	2176702	1584012	1593506	12054	12389	60	tp:A:P	cm:i:1229	s1:i:12013			rl:i:0
scaffold_279	35401	4	35384	-	scaffold_12	2176702	1593502	1630186	35374	35382	60	tp:A:P	cm:i:3540	s1:i:35374			rl:i:0
scaffold_313	29710	17	29700	-	scaffold_12	2176702	1604649	1605489	29661	29691	60	tp:A:P	cm:i:2961	s1:i:29659			rl:i:0
scaffold_310	29934	7	29916	+	scaffold_12	2176702	1606498	1607545	29887	29909	60	tp:A:P	cm:i:3027	s1:i:29887			rl:i:0
scaffold_30	177661	144985	147454	+	scaffold_12	2176702	1637179	1643806	2469	2469	60	tp:A:P	cm:i:258	s1:i:2469			rl:i:0
scaffold_299	33319	6957	33319	-	scaffold_12	2176702	1648653	1656283	26316	26362	60	tp:A:P	cm:i:2611	s1:i:26316			rl:i:57
scaffold_330	26715	1	26710	-	scaffold_12	2176702	1656523	1658013	26682	26709	60	tp:A:P	cm:i:2637	s1:i:26679			rl:i:0
scaffold_345	24958	1	24953	+	scaffold_12	2176702	1670203	1671344	24952	24952	60	tp:A:P	cm:i:2529	s1:i:24952			rl:i:0
scaffold_284	34357	9	34353	-	scaffold_12	2176702	1672357	1694645	34344	34344	60	tp:A:P	cm:i:3427	s1:i:34344			rl:i:0
scaffold_343	24993	16	24986	+	scaffold_12	2176702	1694297	1694397	24970	24970	60	tp:A:P	cm:i:2461	s1:i:24970			rl:i:0
scaffold_271	36581	15	36566	-	scaffold_12	2176702	1698711	1773706	36548	36551	60	tp:A:P	cm:i:3657	s1:i:36548			rl:i:0
scaffold_283	34512	7	34506	+	scaffold_12	2176702	1774390	1944026	34488	34499	60	tp:A:P	cm:i:3426	s1:i:34488			rl:i:0
scaffold_294	32610	4496	32597	-	scaffold_12	2176702	1944418	1953669	28100	28102	60	tp:A:P	cm:i:2825	s1:i:28100			rl:i:0
scaffold_280	35171	0	35171	-	scaffold_12	2176702	1953573	1984753	35148	35178	60	tp:A:P	cm:i:3480	s1:i:35148			rl:i:0
scaffold_282	34512	1	34499	+	scaffold_12	2176702	2012422	2036985	34478	34535	60	tp:A:P	cm:i:3401	s1:i:34475			rl:i:0
scaffold_298	32290	4	32281	+	scaffold_12	2176702	2036426	2044190	32207	32280	60	tp:A:P	cm:i:3253	s1:i:32207			rl:i:0
scaffold_316	29300	2	29248	-	scaffold_12	2176702	2045288	2048465	29246	29246	60	tp:A:P	cm:i:2913	s1:i:29246			rl:i:0
scaffold_288	33247	3	33231	-	scaffold_12	2176702	2048391	2064419	33228	33228	60	tp:A:P	cm:i:3368	s1:i:33228			rl:i:0
scaffold_289	33214	10	33211	+	scaffold_12	2176702	2063860	2078658	33181	33201	60	tp:A:P	cm:i:3282	s1:i:33181			rl:i:0
scaffold_28	197660	18	5781	+	scaffold_12	2176702	2078918	2116708	5763	5763	60	tp:A:P	cm:i:561	s1:i:5763			rl:i:0
scaffold_3	573100	1	573082	+	scaffold_12	2176702	2116856	2123712	573015	573084	60	tp:A:P	cm:i:57190	s1:i:573015			rl:i:0
scaffold_300	32102	3	32091	-	scaffold_12	2176702	2123865	2127279	31986	32089	60	tp:A:P	cm:i:3155	s1:i:31986			rl:i:0
scaffold_28	197660	7872	17556	+	scaffold_12	2176702	2128241	2166305	9684	9684	60	tp:A:P	cm:i:976	s1:i:9684			rl:i:0
scaffold_324	27059	11	27045	-	scaffold_12	2176702	2171342	2173269	27034	27034	60	tp:A:P	cm:i:2715	s1:i:27034			rl:i:0
scaffold_323	27072	3	27069	+	scaffold_12	2176702	2174453	2176533	27051	27070	60	tp:A:P	cm:i:2706	s1:i:27051			rl:i:0
scaffold_381	20188	10	20174	+	scaffold_13	1109935	739	1846	20150	20164	60	tp:A:P	cm:i:2016	s1:i:20150			rl:i:0
scaffold_382	19964	9	19955	+	scaffold_13	1109935	24837	25941	19893	19954	60	tp:A:P	cm:i:2038	s1:i:19890			rl:i:25
scaffold_372	20924	15	20908	-	scaffold_13	1109935	27748	30035	20868	20893	60	tp:A:P	cm:i:2085	s1:i:20868			rl:i:0
scaffold_375	20719	10	20706	+	scaffold_13	1109935	30151	31837	20646	20698	60	tp:A:P	cm:i:2069	s1:i:20646			rl:i:0
scaffold_363	22206	16	22192	-	scaffold_13	1109935	36245	50501	22053	22182	60	tp:A:P	cm:i:2174	s1:i:22051			rl:i:0
scaffold_366	21592	12	21589	+	scaffold_13	1109935	50594	51992	21524	21578	60	tp:A:P	cm:i:2166	s1:i:21524			rl:i:0
scaffold_37	164435	0	164429	-	scaffold_13	1109935	59389	62556	164335	164431	60	tp:A:P	cm:i:16550	s1:i:164335			rl:i:0
scaffold_377	20572	18	20560	+	scaffold_13	1109935	62575	64158	20163	20544	60	tp:A:P	cm:i:1977	s1:i:20098			rl:i:0
scaffold_38	163549	8	163532	+	scaffold_13	1109935	64171	65486	163466	163526	60	tp:A:P	cm:i:16278	s1:i:163466			rl:i:0
scaffold_358	22710	15	22703	-	scaffold_13	1109935	65562	90901	22671	22689	60	tp:A:P	cm:i:2264	s1:i:22671			rl:i:0
scaffold_352	23180	83	23164	-	scaffold_13	1109935	91072	112497	22920	23102	60	tp:A:P	cm:i:2263	s1:i:22915			rl:i:0
scaffold_378	20462	10	20460	+	scaffold_13	1109935	112952	114461	20450	20450	60	tp:A:P	cm:i:2028	s1:i:20450			rl:i:0
scaffold_351	23489	3	23481	-	scaffold_13	1109935	114442	156872	23369	23480	60	tp:A:P	cm:i:2329	s1:i:23369			rl:i:38
scaffold_35	169689	5	169678	-	scaffold_13	1109935	114636	114799	169600	169676	60	tp:A:P	cm:i:16977	s1:i:169591			rl:i:35
scaffold_355	22831	16	22828	+	scaffold_13	1109935	157085	191033	22812	22812	60	tp:A:P	cm:i:2288	s1:i:22812			rl:i:0
scaffold_362	22301	11	22299	+	scaffold_13	1109935	191771	206132	22229	22288	60	tp:A:P	cm:i:2264	s1:i:22229			rl:i:0
scaffold_350	24106	7	24090	-	scaffold_13	1109935	206817	210192	24002	24085	60	tp:A:P	cm:i:2403	s1:i:24002			rl:i:0
scaffold_367	21473	11	21463	-	scaffold_13	1109935	210138	214892	21452	21452	60	tp:A:P	cm:i:2156	s1:i:21452			rl:i:0
scaffold_359	22612	18	22606	-	scaffold_13	1109935	215939	236473	22396	22590	60	tp:A:P	cm:i:2235	s1:i:22396			rl:i:0
scaffold_361	22368	17	22365	-	scaffold_13	1109935	236391	250786	22348	22348	60	tp:A:P	cm:i:2182	s1:i:22348			rl:i:0
scaffold_356	22744	7	22730	-	scaffold_13	1109935	250448	282987	22716	22724	60	tp:A:P	cm:i:2280	s1:i:22716			rl:i:0
scaffold_380	20261	11	56	-	scaffold_13	1109935	294214	294336	45	53	0	tp:A:S	cm:i:3	s1:i:43
scaffold_348	24746	11	24746	-	scaffold_13	1109935	295420	337960	24667	24840	60	tp:A:P	cm:i:2452	s1:i:24645			rl:i:0
scaffold_353	23121	10	23115	+	scaffold_13	1109935	338297	373475	22874	23109	60	tp:A:P	cm:i:2261	s1:i:22838			rl:i:0
scaffold_349	24591	13	24577	+	scaffold_13	1109935	374016	396228	24553	24564	60	tp:A:P	cm:i:2406	s1:i:24553			rl:i:0
scaffold_346	24755	19516	24745	-	scaffold_13	1109935	396368	569373	5206	5229	60	tp:A:P	cm:i:507	s1:i:5206			rl:i:0
scaffold_347	24727	15	24712	-	scaffold_13	1109935	570006	642520	24625	24702	60	tp:A:P	cm:i:2457	s1:i:24625			rl:i:0
scaffold_354	22970	14	22967	-	scaffold_13	1109935	642706	676856	22953	22953	60	tp:A:P	cm:i:2326	s1:i:22953			rl:i:0
scaffold_380	20261	11	70	-	scaffold_13	1109935	677098	678238	59	59	26	tp:A:P	cm:i:7	s1:i:59			rl:i:0
scaffold_365	21811	9	21807	-	scaffold_13	1109935	684029	691018	21623	21799	60	tp:A:P	cm:i:2145	s1:i:21623			rl:i:0
scaffold_364	22000	16	21990	-	scaffold_13	1109935	692093	704877	21824	21974	60	tp:A:P	cm:i:2138	s1:i:21798			rl:i:0
scaffold_357	22728	5	22722	-	scaffold_13	1109935	706537	878070	22717	22717	60	tp:A:P	cm:i:2283	s1:i:22717			rl:i:0
scaffold_379	20417	11	20417	-	scaffold_13	1109935	877981	879407	20406	20410	60	tp:A:P	cm:i:2028	s1:i:20405			rl:i:0
scaffold_368	21111	3	21106	-	scaffold_13	1109935	880586	884469	20966	21110	60	tp:A:P	cm:i:2108	s1:i:20964			rl:i:0
scaffold_36	166500	5	166493	+	scaffold_13	1109935	884413	970357	166265	166705	60	tp:A:P	cm:i:16616	s1:i:166221			rl:i:0
scaffold_360	22448	1	22432	-	scaffold_13	1109935	970177	1040332	22419	22431	60	tp:A:P	cm:i:2242	s1:i:22419			rl:i:22
scaffold_373	20811	2	20795	-	scaffold_13	1109935	1039842	1043583	20466	20813	60	tp:A:P	cm:i:2033	s1:i:20461			rl:i:0
scaffold_369	21106	7	21088	+	scaffold_13	1109935	1044998	1048309	21046	21081	60	tp:A:P	cm:i:2144	s1:i:21046			rl:i:0
scaffold_380	20261	91	20255	+	scaffold_13	1109935	1048097	1049385	20164	20164	60	tp:A:P	cm:i:2002	s1:i:20164			rl:i:0
scaffold_383	19679	13	19679	-	scaffold_13	1109935	1050629	1051640	19588	19670	60	tp:A:P	cm:i:1967	s1:i:19587			rl:i:0
scaffold_376	20545	8	20544	-	scaffold_13	1109935	1054231	1055802	20521	20536	60	tp:A:P	cm:i:2036	s1:i:20521			rl:i:0
scaffold_374	20771	2	20758	-	scaffold_13	1109935	1055742	1057475	20701	20756	60	tp:A:P	cm:i:2047	s1:i:20701			rl:i:19
scaffold_371	20976	10	20958	-	scaffold_13	1109935	1061087	1063660	20937	20949	60	tp:A:P	cm:i:2089	s1:i:20937			rl:i:0
scaffold_370	21050	14	21034	-	scaffold_13	1109935	1068671	1071286	21020	21020	60	tp:A:P	cm:i:2087	s1:i:21020			rl:i:0
scaffold_387	19015	4	19006	+	scaffold_14	116032	4613	4697	18972	19002	60	tp:A:P	cm:i:1877	s1:i:18972			rl:i:0
scaffold_385	19412	11	19400	-	scaffold_14	116032	13880	13964	19389	19389	60	tp:A:P	cm:i:1915	s1:i:19389			rl:i:0
scaffold_388	19066	5	2046	+	scaffold_14	116032	23215	23299	2041	2041	60	tp:A:P	cm:i:215	s1:i:2041			rl:i:38
scaffold_386	19264	15	19249	-	scaffold_14	116032	32550	32634	19181	19240	60	tp:A:P	cm:i:1894	s1:i:19179			rl:i:0
scaffold_39	157942	71041	72859	-	scaffold_14	116032	41894	41978	1783	1818	60	tp:A:P	cm:i:176	s1:i:1783			rl:i:0
scaffold_388	19066	1829	19059	-	scaffold_14	116032	51236	51320	17145	17233	60	tp:A:P	cm:i:1702	s1:i:17145			rl:i:38
scaffold_384	19365	10	19359	-	scaffold_14	116032	69933	70017	19349	19480	60	tp:A:P	cm:i:1931	s1:i:19322			rl:i:0
scaffold_39	157942	71972	157926	-	scaffold_14	116032	88613	88697	85875	85955	60	tp:A:P	cm:i:8572	s1:i:85872			rl:i:0
scaffold_389	18972	7	18968	+	scaffold_14	116032	97944	98028	18961	18961	60	tp:A:P	cm:i:1896	s1:i:18961			rl:i:0
scaffold_39	157942	8	70165	-	scaffold_14	116032	107228	107312	70101	70159	60	tp:A:P	cm:i:7038	s1:i:70101			rl:i:0
scaffold_390	18933	10	18925	+	scaffold_15	103986	5962	51555	18908	18916	60	tp:A:P	cm:i:1867	s1:i:18908			rl:i:19
scaffold_391	18904	11	18900	+	scaffold_15	103986	51784	59144	18869	18889	60	tp:A:P	cm:i:1892	s1:i:18869			rl:i:0
scaffold_392	18681	2	18669	-	scaffold_16	99945	80104	98550	18655	18667	60	tp:A:P	cm:i:1856	s1:i:18655			rl:i:0
scaffold_393	18495	2	18477	+	scaffold_17	96933	8057	52106	18457	18475	11	tp:A:P	cm:i:1843	s1:i:18457			rl:i:0
scaffold_393	18495	2	18477	+	scaffold_18	92116	26676	26760	17933	18487	0	tp:A:S	cm:i:1765	s1:i:17931
scaffold_397	18341	15	18331	-	scaffold_19	42417	10	1589	18288	18316	60	tp:A:P	cm:i:1904	s1:i:18288			rl:i:0
scaffold_398	20910	12653	14431	+	scaffold_19	42417	2230	4058	1769	1778	60	tp:A:P	cm:i:179	s1:i:1769			rl:i:19
scaffold_398	20910	19803	20908	+	scaffold_19	42417	5455	6965	972	1105	0	tp:A:S	cm:i:91	s1:i:972
scaffold_395	18440	4	18428	+	scaffold_19	42417	6895	9844	17512	19299	60	tp:A:P	cm:i:1737	s1:i:17337			rl:i:0
scaffold_40	155174	140238	155157	-	scaffold_19	42417	10908	12014	14913	14919	60	tp:A:P	cm:i:1489	s1:i:14913			rl:i:0
scaffold_394	18408	14	18384	-	scaffold_19	42417	13421	13480	18370	18372	60	tp:A:P	cm:i:1844	s1:i:18370			rl:i:19
scaffold_400	18278	17	18260	+	scaffold_19	42417	14255	15261	18232	18245	60	tp:A:P	cm:i:1838	s1:i:18232			rl:i:0
scaffold_398	20910	19803	20908	-	scaffold_19	42417	16815	18396	1032	1105	16	tp:A:P	cm:i:103	s1:i:1032			rl:i:19
scaffold_399	18330	2612	18326	-	scaffold_19	42417	18438	19906	15714	15714	60	tp:A:P	cm:i:1584	s1:i:15714			rl:i:0
scaffold_398	20910	14553	18409	+	scaffold_19	42417	20783	22756	3856	3856	60	tp:A:P	cm:i:395	s1:i:3856			rl:i:19
scaffold_4	494828	18	494827	-	scaffold_19	42417	23192	24603	494656	494820	60	tp:A:P	cm:i:49631	s1:i:494647			rl:i:19
scaffold_396	18387	10	18382	-	scaffold_19	42417	24951	27538	18345	18372	60	tp:A:P	cm:i:1854	s1:i:18345			rl:i:56
scaffold_399	18330	14	3887	+	scaffold_19	42417	33112	34487	2958	3876	60	tp:A:P	cm:i:283	s1:i:2958			rl:i:0
scaffold_40	155174	3	140881	+	scaffold_19	42417	34580	35915	140467	140897	60	tp:A:P	cm:i:14085	s1:i:140460			rl:i:0
scaffold_401	18247	0	18245	+	scaffold_19	42417	37692	38760	18192	18248	60	tp:A:P	cm:i:1805	s1:i:18192			rl:i:38
scaffold_398	20910	8	12530	-	scaffold_19	42417	41847	42417	12522	12522	60	tp:A:P	cm:i:1262	s1:i:12522			rl:i:19
scaffold_424	15428	18	15416	-	scaffold_2	3984596	4985	48117	15398	15398	60	tp:A:P	cm:i:1539	s1:i:15398			rl:i:19
scaffold_436	14382	2	14368	-	scaffold_2	3984596	61385	83816	14111	14370	60	tp:A:P	cm:i:1430	s1:i:14109			rl:i:0
scaffold_416	16816	5	16798	-	scaffold_2	3984596	83797	140844	16761	16794	60	tp:A:P	cm:i:1641	s1:i:16761			rl:i:0
scaffold_427	15284	16	15268	-	scaffold_2	3984596	140992	182203	15252	15252	60	tp:A:P	cm:i:1548	s1:i:15252			rl:i:0
scaffold_422	16799	14251	16794	+	scaffold_2	3984596	182378	201248	2491	2543	60	tp:A:P	cm:i:255	s1:i:2491			rl:i:19
scaffold_457	12708	3	12692	+	scaffold_2	3984596	201268	206075	12689	12689	60	tp:A:P	cm:i:1250	s1:i:12689			rl:i:0
scaffold_481	11138	7	11136	-	scaffold_2	3984596	206741	208174	11091	11129	60	tp:A:P	cm:i:1081	s1:i:11091			rl:i:0
scaffold_454	12803	13	12783	+	scaffold_2	3984596	208294	214418	12770	12770	60	tp:A:P	cm:i:1257	s1:i:12770			rl:i:19
scaffold_474	11475	11	11465	+	scaffold_2	3984596	216076	218225	11454	11454	60	tp:A:P	cm:i:1137	s1:i:11454			rl:i:0
scaffold_422	16799	15	14134	+	scaffold_2	3984596	218111	245131	14119	14119	60	tp:A:P	cm:i:1408	s1:i:14119			rl:i:19
scaffold_434	14437	5	14420	+	scaffold_2	3984596	244009	272525	14323	14415	60	tp:A:P	cm:i:1414	s1:i:14318			rl:i:0
scaffold_429	18974	17	2024	-	scaffold_2	3984596	272660	308633	2007	2007	60	tp:A:P	cm:i:212	s1:i:2007			rl:i:0
scaffold_443	13377	2	13376	-	scaffold_2	3984596	310284	324138	13374	13374	60	tp:A:P	cm:i:1341	s1:i:13374			rl:i:0
scaffold_466	12345	14	12226	+	scaffold_2	3984596	366395	369448	11941	12485	60	tp:A:P	cm:i:1146	s1:i:11884			rl:i:281
scaffold_458	12517	12	12509	+	scaffold_2	3984596	369683	374339	12483	12497	60	tp:A:P	cm:i:1265	s1:i:12483			rl:i:0
scaffold_490	10686	3	10671	-	scaffold_2	3984596	378673	378811	10658	10668	60	tp:A:P	cm:i:1076	s1:i:10658			rl:i:0
scaffold_46	148194	15	10363	-	scaffold_2	3984596	380146	383974	10328	10348	60	tp:A:P	cm:i:1012	s1:i:10328			rl:i:31
scaffold_420	16041	10	16038	-	scaffold_2	3984596	397838	446439	16028	16028	60	tp:A:P	cm:i:1587	s1:i:16028			rl:i:0
scaffold_482	11052	5	11051	-	scaffold_2	3984596	447178	549337	10990	11050	60	tp:A:P	cm:i:1106	s1:i:10990			rl:i:0
scaffold_439	13889	17	13881	+	scaffold_2	3984596	555769	574771	13795	13864	60	tp:A:P	cm:i:1385	s1:i:13793			rl:i:0
scaffold_409	17778	4	17701	-	scaffold_2	3984596	587349	654232	17664	17697	60	tp:A:P	cm:i:1739	s1:i:17664			rl:i:0
scaffold_461	12421	8	12421	-	scaffold_2	3984596	653860	657165	12394	12413	60	tp:A:P	cm:i:1187	s1:i:12394			rl:i:38
scaffold_41	154007	13	154006	+	scaffold_2	3984596	666117	670212	153986	153993	60	tp:A:P	cm:i:15309	s1:i:153986			rl:i:0
scaffold_421	15897	3	15887	+	scaffold_2	3984596	668555	716683	15742	15887	60	tp:A:P	cm:i:1571	s1:i:15742			rl:i:0
scaffold_492	10542	4	10521	-	scaffold_2	3984596	721167	721224	10457	10517	60	tp:A:P	cm:i:1047	s1:i:10450			rl:i:19
scaffold_441	13624	16	13606	+	scaffold_2	3984596	722379	724922	13590	13590	60	tp:A:P	cm:i:1376	s1:i:13590			rl:i:0
scaffold_426	15321	13	15310	-	scaffold_2	3984596	726203	759296	15297	15297	60	tp:A:P	cm:i:1505	s1:i:15297			rl:i:0
scaffold_450	13011	9	13010	-	scaffold_2	3984596	759313	763856	12992	13002	60	tp:A:P	cm:i:1280	s1:i:12992			rl:i:0
scaffold_445	13441	15	13435	-	scaffold_2	3984596	764358	776771	13030	13425	0	tp:A:S	cm:i:1304	s1:i:13030
scaffold_46	148194	25682	148183	-	scaffold_2	3984596	778102	782037	122478	122502	60	tp:A:P	cm:i:12251	s1:i:122478			rl:i:31
scaffold_479	11141	17	11141	-	scaffold_2	3984596	794362	796069	11124	11124	60	tp:A:P	cm:i:1117	s1:i:11124			rl:i:19
scaffold_47	146543	8	146526	-	scaffold_2	3984596	796544	799182	146460	146535	60	tp:A:P	cm:i:14731	s1:i:146455			rl:i:0
scaffold_403	18107	8	18099	+	scaffold_2	3984596	799406	1109681	18091	18091	60	tp:A:P	cm:i:1798	s1:i:18091			rl:i:0
scaffold_418	16222	5	16209	+	scaffold_2	3984596	1110520	1362465	16204	16204	60	tp:A:P	cm:i:1642	s1:i:16204			rl:i:0
scaffold_438	14271	12	14267	-	scaffold_2	3984596	1362498	1382662	14250	14256	60	tp:A:P	cm:i:1446	s1:i:14250			rl:i:0
scaffold_442	13496	9	13478	+	scaffold_2	3984596	1389312	1403609	13407	13470	60	tp:A:P	cm:i:1300	s1:i:13407			rl:i:0
scaffold_455	12802	16	12800	+	scaffold_2	3984596	1411276	1418777	12784	12784	60	tp:A:P	cm:i:1269	s1:i:12784			rl:i:0
scaffold_456	12718	3	12717	+	scaffold_2	3984596	1418945	1424398	12714	12714	60	tp:A:P	cm:i:1257	s1:i:12714			rl:i:0
scaffold_402	18212	18	18210	-	scaffold_2	3984596	1424622	1872224	18183	18195	60	tp:A:P	cm:i:1818	s1:i:18183			rl:i:0
scaffold_411	17435	12	17423	+	scaffold_2	3984596	1872350	1937145	17411	17411	60	tp:A:P	cm:i:1768	s1:i:17411			rl:i:0
scaffold_414	16989	4	16986	-	scaffold_2	3984596	1936889	1996211	16967	16982	60	tp:A:P	cm:i:1679	s1:i:16967			rl:i:0
scaffold_42	151758	4	151750	-	scaffold_2	3984596	2002625	2237271	151712	151758	60	tp:A:P	cm:i:15211	s1:i:151710			rl:i:0
scaffold_476	11397	7	11393	+	scaffold_2	3984596	2238426	2240361	11386	11386	60	tp:A:P	cm:i:1146	s1:i:11386			rl:i:0
scaffold_488	10753	3	10740	+	scaffold_2	3984596	2257570	2258704	10666	10737	60	tp:A:P	cm:i:1056	s1:i:10666			rl:i:0
scaffold_469	12077	8	12043	-	scaffold_2	3984596	2262811	2265711	11999	12036	60	tp:A:P	cm:i:1188	s1:i:11996			rl:i:0
scaffold_475	11437	14	11426	+	scaffold_2	3984596	2273678	2275719	11389	11412	60	tp:A:P	cm:i:1153	s1:i:11389			rl:i:0
scaffold_412	17253	11	17253	+	scaffold_2	3984596	2278763	2282639	17242	17242	60	tp:A:P	cm:i:1716	s1:i:17242			rl:i:0
scaffold_431	14693	11	14687	+	scaffold_2	3984596	2285666	2292494	14676	14676	60	tp:A:P	cm:i:1472	s1:i:14676			rl:i:0
scaffold_48	144362	11	144352	-	scaffold_2	3984596	2293790	2295508	144291	144345	60	tp:A:P	cm:i:14453	s1:i:144291			rl:i:0
scaffold_49	144332	18	144319	+	scaffold_2	3984596	2297912	2298050	144257	144301	60	tp:A:P	cm:i:14370	s1:i:144254			rl:i:0
scaffold_464	12203	16	12190	+	scaffold_2	3984596	2303169	2306283	12174	12174	60	tp:A:P	cm:i:1217	s1:i:12174			rl:i:0
scaffold_493	10546	2	10529	-	scaffold_2	3984596	2310180	2311175	10513	10527	60	tp:A:P	cm:i:1032	s1:i:10513			rl:i:0
scaffold_417	16576	5	16566	-	scaffold_2	3984596	2312214	2313413	16544	16561	60	tp:A:P	cm:i:1634	s1:i:16544			rl:i:0
scaffold_430	14771	17	14757	-	scaffold_2	3984596	2313037	2504527	14704	14740	60	tp:A:P	cm:i:1469	s1:i:14704			rl:i:0
scaffold_471	11696	16	11690	-	scaffold_2	3984596	2505268	2507513	11672	11674	60	tp:A:P	cm:i:1136	s1:i:11672			rl:i:19
scaffold_407	17902	3	17887	+	scaffold_2	3984596	2507461	2535269	17806	17884	60	tp:A:P	cm:i:1796	s1:i:17803			rl:i:0
scaffold_435	14408	8	14402	+	scaffold_2	3984596	2534852	2701557	14379	14394	60	tp:A:P	cm:i:1419	s1:i:14379			rl:i:0
scaffold_43	155813	5	155812	+	scaffold_2	3984596	2701143	2735642	155807	155807	60	tp:A:P	cm:i:15605	s1:i:155807			rl:i:0
scaffold_468	12078	1	12062	+	scaffold_2	3984596	2735664	2738681	11964	12061	60	tp:A:P	cm:i:1197	s1:i:11964			rl:i:0
scaffold_462	12391	11	12375	-	scaffold_2	3984596	2738829	2742134	12293	12364	60	tp:A:P	cm:i:1225	s1:i:12293			rl:i:0
scaffold_433	14374	12	14360	-	scaffold_2	3984596	2743849	2773240	14327	14536	60	tp:A:P	cm:i:1399	s1:i:14289			rl:i:0
scaffold_44	150611	18	150595	-	scaffold_2	3984596	2773472	2791844	150414	150593	60	tp:A:P	cm:i:14995	s1:i:150411			rl:i:0
scaffold_408	17895	16	17894	-	scaffold_2	3984596	2803118	2872348	17822	17878	60	tp:A:P	cm:i:1789	s1:i:17822			rl:i:0
scaffold_485	10975	15	10968	-	scaffold_2	3984596	2880089	2881299	10953	10953	60	tp:A:P	cm:i:1085	s1:i:10953			rl:i:0
scaffold_480	11163	8	11160	-	scaffold_2	3984596	2881224	2882940	11152	11152	60	tp:A:P	cm:i:1136	s1:i:11152			rl:i:0
scaffold_473	11682	9	11664	+	scaffold_2	3984596	2889803	2891945	11655	11655	60	tp:A:P	cm:i:1152	s1:i:11655			rl:i:0
scaffold_46	148194	11306	25817	+	scaffold_2	3984596	2893061	2896907	14435	14511	60	tp:A:P	cm:i:1459	s1:i:14435			rl:i:31
scaffold_460	12501	1	12486	+	scaffold_2	3984596	2941257	2944600	12485	12485	60	tp:A:P	cm:i:1267	s1:i:12485			rl:i:0
scaffold_410	17569	9	17555	-	scaffold_2	3984596	2945182	3013421	17522	17546	60	tp:A:P	cm:i:1745	s1:i:17522			rl:i:0
scaffold_413	17224	4	17213	+	scaffold_2	3984596	3015644	3075934	17205	17209	60	tp:A:P	cm:i:1695	s1:i:17205			rl:i:0
scaffold_415	16956	12	16954	+	scaffold_2	3984596	3075613	3134112	16918	16942	60	tp:A:P	cm:i:1689	s1:i:16918			rl:i:0
scaffold_404	18026	6	18019	-	scaffold_2	3984596	3133801	3219919	18004	18013	60	tp:A:P	cm:i:1785	s1:i:18004			rl:i:0
scaffold_440	13776	12	13772	-	scaffold_2	3984596	3233369	3251399	13731	13760	60	tp:A:P	cm:i:1406	s1:i:13731			rl:i:0
scaffold_425	15461	14	15449	+	scaffold_2	3984596	3251066	3294104	15282	15477	60	tp:A:P	cm:i:1528	s1:i:15273			rl:i:0
scaffold_423	15407	4	15393	+	scaffold_2	3984596	3294026	3337265	15367	15389	60	tp:A:P	cm:i:1550	s1:i:15367			rl:i:0
scaffold_463	12324	13	12306	-	scaffold_2	3984596	3339245	3342546	12259	12293	60	tp:A:P	cm:i:1248	s1:i:12259			rl:i:0
scaffold_448	13055	9	13051	+	scaffold_2	3984596	3342455	3353503	13042	13042	60	tp:A:P	cm:i:1280	s1:i:13042			rl:i:0
scaffold_465	12231	13	12220	-	scaffold_2	3984596	3360157	3363331	12182	12207	60	tp:A:P	cm:i:1212	s1:i:12182			rl:i:0
scaffold_437	14312	1	14298	+	scaffold_2	3984596	3370837	3391729	14297	14297	60	tp:A:P	cm:i:1440	s1:i:14297			rl:i:0
scaffold_446	13357	8	13345	-	scaffold_2	3984596	3392042	3403716	13317	13337	60	tp:A:P	cm:i:1365	s1:i:13315			rl:i:0
scaffold_467	12159	10	12144	-	scaffold_2	3984596	3418866	3421890	12134	12136	60	tp:A:P	cm:i:1222	s1:i:12134			rl:i:0
scaffold_449	12982	9	12975	-	scaffold_2	3984596	3423222	3434067	12959	12966	60	tp:A:P	cm:i:1320	s1:i:12959			rl:i:28
scaffold_406	17943	3	17938	-	scaffold_2	3984596	3440000	3516203	17932	17937	60	tp:A:P	cm:i:1806	s1:i:17932			rl:i:0
scaffold_459	12472	17	12472	-	scaffold_2	3984596	3518407	3522494	12449	12456	60	tp:A:P	cm:i:1226	s1:i:12449			rl:i:0
scaffold_447	13088	9	13084	+	scaffold_2	3984596	3522608	3533737	13075	13075	60	tp:A:P	cm:i:1301	s1:i:13075			rl:i:0
scaffold_432	14815	14	14811	+	scaffold_2	3984596	3540102	3571526	14691	14798	60	tp:A:P	cm:i:1476	s1:i:14691			rl:i:0
scaffold_470	11854	7	11837	-	scaffold_2	3984596	3573621	3576118	11810	11830	60	tp:A:P	cm:i:1174	s1:i:11807			rl:i:0
scaffold_453	12826	0	12817	+	scaffold_2	3984596	3576278	3584659	12817	12819	60	tp:A:P	cm:i:1307	s1:i:12817			rl:i:0
scaffold_484	10988	6	10983	-	scaffold_2	3984596	3584674	3585962	10977	10981	60	tp:A:P	cm:i:1127	s1:i:10976			rl:i:0
scaffold_452	12899	14	12890	-	scaffold_2	3984596	3585764	3594174	12876	12876	60	tp:A:P	cm:i:1272	s1:i:12876			rl:i:0
scaffold_478	11272	8	11256	+	scaffold_2	3984596	3593987	3595784	11180	11248	60	tp:A:P	cm:i:1134	s1:i:11174			rl:i:0
scaffold_451	12948	8	12944	-	scaffold_2	3984596	3596587	3605376	12920	12937	60	tp:A:P	cm:i:1289	s1:i:12920			rl:i:0
scaffold_491	10624	2	10618	+	scaffold_2	3984596	3615801	3615939	10591	10620	60	tp:A:P	cm:i:1074	s1:i:10591			rl:i:38
scaffold_472	11720	11	11707	+	scaffold_2	3984596	3622847	3625013	11696	11697	60	tp:A:P	cm:i:1175	s1:i:11696			rl:i:0
scaffold_477	11295	6	11278	-	scaffold_2	3984596	3627723	3629572	11269	11273	60	tp:A:P	cm:i:1110	s1:i:11269			rl:i:0
scaffold_489	10673	2	10665	+	scaffold_2	3984596	3629495	3630633	10594	10663	60	tp:A:P	cm:i:1053	s1:i:10594			rl:i:0
scaffold_487	10887	4	10887	-	scaffold_2	3984596	3630657	3631836	10883	10883	60	tp:A:P	cm:i:1080	s1:i:10883			rl:i:0
scaffold_483	10972	2	10963	-	scaffold_2	3984596	3631832	3633167	10494	10961	60	tp:A:P	cm:i:1029	s1:i:10493			rl:i:0
scaffold_429	18974	4123	18960	+	scaffold_2	3984596	3633356	3670914	14812	14838	60	tp:A:P	cm:i:1488	s1:i:14812			rl:i:0
scaffold_428	14987	10	14972	-	scaffold_2	3984596	3672039	3711889	14962	14962	60	tp:A:P	cm:i:1515	s1:i:14962			rl:i:0
scaffold_405	18044	5	18042	-	scaffold_2	3984596	3711663	3790819	18004	18037	60	tp:A:P	cm:i:1817	s1:i:18002			rl:i:0
scaffold_419	16130	18	16112	-	scaffold_2	3984596	3790800	3841772	16076	16094	60	tp:A:P	cm:i:1577	s1:i:16076			rl:i:0
scaffold_444	13259	0	13251	-	scaffold_2	3984596	3841851	3854788	13217	13251	60	tp:A:P	cm:i:1328	s1:i:13217			rl:i:0
scaffold_445	13441	15	13435	-	scaffold_2	3984596	3854948	3867433	13319	13422	8	tp:A:P	cm:i:1339	s1:i:13318			rl:i:0
scaffold_45	148907	14	148894	+	scaffold_2	3984596	3873799	3883991	148705	148911	60	tp:A:P	cm:i:14855	s1:i:148691			rl:i:0
scaffold_486	10860	7	10852	+	scaffold_2	3984596	3884067	3984580	10799	10845	60	tp:A:P	cm:i:1088	s1:i:10799			rl:i:25
scaffold_494	10392	13	10391	+	scaffold_20	78712	41937	42021	10314	10378	60	tp:A:P	cm:i:1002	s1:i:10314			rl:i:0
scaffold_495	10461	17	10445	-	scaffold_20	78712	60185	60269	10395	10433	60	tp:A:P	cm:i:1000	s1:i:10394			rl:i:0
scaffold_496	10401	1	10387	+	scaffold_20	78712	66269	68932	10386	10386	60	tp:A:P	cm:i:1053	s1:i:10386			rl:i:0
scaffold_497	10247	0	10241	+	scaffold_20	78712	72978	75634	10207	10241	60	tp:A:P	cm:i:1017	s1:i:10206			rl:i:0
scaffold_498	10428	13	1509	+	scaffold_21	75690	47475	47559	1496	1496	60	tp:A:P	cm:i:156	s1:i:1496			rl:i:0
scaffold_498	10428	1141	10423	+	scaffold_21	75690	56789	56873	8688	9282	60	tp:A:P	cm:i:868	s1:i:8676			rl:i:0
scaffold_499	10216	16	10204	-	scaffold_22	70843	14962	15046	10188	10192	60	tp:A:P	cm:i:1012	s1:i:10187			rl:i:0
scaffold_5	429470	164153	429454	+	scaffold_23	69949	576	2654	265213	265318	60	tp:A:P	cm:i:26382	s1:i:265208			rl:i:0
scaffold_50	138215	2	138210	-	scaffold_23	69949	3839	5763	138130	138214	60	tp:A:P	cm:i:13839	s1:i:138130			rl:i:19
scaffold_503	9714	9	9702	+	scaffold_23	69949	19613	20724	9498	9696	60	tp:A:P	cm:i:938	s1:i:9496			rl:i:0
scaffold_501	10047	4	10043	+	scaffold_23	69949	48483	49945	10023	10039	60	tp:A:P	cm:i:1014	s1:i:10023			rl:i:0
scaffold_502	9814	10	9801	-	scaffold_23	69949	49960	51165	9781	9791	60	tp:A:P	cm:i:968	s1:i:9781			rl:i:0
scaffold_5	429470	16	164403	+	scaffold_23	69949	52589	54427	163958	164590	60	tp:A:P	cm:i:16315	s1:i:163906			rl:i:0
scaffold_500	10199	7	10190	+	scaffold_23	69949	63057	64797	10183	10183	60	tp:A:P	cm:i:1021	s1:i:10183			rl:i:0
scaffold_504	10143	5753	9399	+	scaffold_24	62405	36606	40849	3479	3646	60	tp:A:P	cm:i:342	s1:i:3476			rl:i:0
scaffold_504	10143	8537	10138	+	scaffold_24	62405	41010	45247	1532	1601	60	tp:A:P	cm:i:149	s1:i:1532			rl:i:0
scaffold_504	10143	10	5617	+	scaffold_24	62405	45592	59002	5607	5607	60	tp:A:P	cm:i:548	s1:i:5607			rl:i:0
scaffold_506	9549	14	9532	+	scaffold_25	61197	1234	1318	9518	9518	60	tp:A:P	cm:i:957	s1:i:9518			rl:i:0
scaffold_505	9539	4	9533	+	scaffold_25	61197	45953	46037	9504	9537	60	tp:A:P	cm:i:978	s1:i:9502			rl:i:0
scaffold_507	9512	15	9509	+	scaffold_25	61197	55045	55129	9494	9494	60	tp:A:P	cm:i:976	s1:i:9494			rl:i:0
scaffold_509	9470	6	9464	+	scaffold_26	57039	8459	8543	9458	9458	60	tp:A:P	cm:i:935	s1:i:9458			rl:i:0
scaffold_508	9494	5	9481	-	scaffold_26	57039	18006	18090	9431	9476	60	tp:A:P	cm:i:925	s1:i:9431			rl:i:0
scaffold_51	136746	13732	136744	-	scaffold_26	57039	27162	27246	122990	123012	60	tp:A:P	cm:i:12390	s1:i:122990			rl:i:0
scaffold_510	9383	3	9377	-	scaffold_26	57039	36265	36349	9308	9374	60	tp:A:P	cm:i:909	s1:i:9308			rl:i:0
scaffold_51	136746	1	13603	+	scaffold_26	57039	45430	45514	13602	13602	60	tp:A:P	cm:i:1355	s1:i:13602			rl:i:0
scaffold_514	9259	16	9250	-	scaffold_27	52398	3592	3676	8779	9251	60	tp:A:P	cm:i:893	s1:i:8776			rl:i:0
scaffold_511	9336	7	9320	-	scaffold_27	52398	12948	13032	9304	9313	60	tp:A:P	cm:i:919	s1:i:9304			rl:i:0
scaffold_512	9333	18	9317	-	scaffold_27	52398	31610	31694	9299	9299	60	tp:A:P	cm:i:954	s1:i:9299			rl:i:0
scaffold_513	9323	3	9318	+	scaffold_27	52398	40939	41023	9315	9315	60	tp:A:P	cm:i:918	s1:i:9315			rl:i:0
scaffold_515	9005	7	8993	+	scaffold_28	50293	45051	45135	8986	8986	60	tp:A:P	cm:i:890	s1:i:8986			rl:i:0
scaffold_604	5144	17	5132	-	scaffold_3	3740466	3124	4178	5066	5115	60	tp:A:P	cm:i:495	s1:i:5066			rl:i:19
scaffold_550	7183	6	7168	-	scaffold_3	3740466	5272	20524	7142	7162	60	tp:A:P	cm:i:717	s1:i:7142			rl:i:0
scaffold_540	7788	10	7774	+	scaffold_3	3740466	24789	47891	7764	7764	60	tp:A:P	cm:i:780	s1:i:7764			rl:i:0
scaffold_551	7263	9	7260	-	scaffold_3	3740466	47498	62460	7251	7251	60	tp:A:P	cm:i:706	s1:i:7251			rl:i:0
scaffold_57	131868	1116	1657	+	scaffold_3	3740466	63210	69048	300	819	60	tp:A:P	cm:i:23	s1:i:244			rl:i:0
scaffold_536	7938	4	7934	+	scaffold_3	3740466	75415	105682	7914	7930	60	tp:A:P	cm:i:792	s1:i:7914			rl:i:0
scaffold_546	7397	14	7385	-	scaffold_3	3740466	110185	131292	7350	7371	60	tp:A:P	cm:i:753	s1:i:7349			rl:i:0
scaffold_54	133001	34209	132991	-	scaffold_3	3740466	132514	137743	98242	98804	60	tp:A:P	cm:i:9845	s1:i:98237			rl:i:0
scaffold_535	7987	0	7971	-	scaffold_3	3740466	137607	170930	7908	7971	60	tp:A:P	cm:i:781	s1:i:7908			rl:i:0
scaffold_517	8945	13	8930	-	scaffold_3	3740466	171031	175747	8869	8917	60	tp:A:P	cm:i:871	s1:i:8869			rl:i:38
scaffold_538	7869	10	6134	+	scaffold_3	3740466	175875	204531	6100	6124	60	tp:A:P	cm:i:634	s1:i:6100			rl:i:0
scaffold_574	6481	1	6475	-	scaffold_3	3740466	205141	209087	6474	6474	60	tp:A:P	cm:i:653	s1:i:6474			rl:i:0
scaffold_534	8054	4	8051	+	scaffold_3	3740466	209487	219171	7986	8047	60	tp:A:P	cm:i:776	s1:i:7986			rl:i:25
scaffold_522	8666	6	8666	+	scaffold_3	3740466	219303	262454	8568	8660	60	tp:A:P	cm:i:838	s1:i:8568			rl:i:0
scaffold_588	10711	18	3138	+	scaffold_3	3740466	262493	264286	3120	3120	60	tp:A:P	cm:i:317	s1:i:3120			rl:i:0
scaffold_560	6874	10	6866	-	scaffold_3	3740466	264463	273277	6819	6856	60	tp:A:P	cm:i:646	s1:i:6819			rl:i:0
scaffold_54	133001	8	36406	+	scaffold_3	3740466	273655	297740	35294	36902	60	tp:A:P	cm:i:3466	s1:i:35195			rl:i:0
scaffold_542	7652	10	7640	-	scaffold_3	3740466	297435	320159	7630	7630	60	tp:A:P	cm:i:792	s1:i:7630			rl:i:0
scaffold_575	6239	2	6227	+	scaffold_3	3740466	320410	324037	6221	6225	60	tp:A:P	cm:i:623	s1:i:6221			rl:i:0
scaffold_527	8444	10	8428	+	scaffold_3	3740466	324273	366193	8311	8418	0	tp:A:S	cm:i:840	s1:i:8311
scaffold_548	7371	0	7362	+	scaffold_3	3740466	366061	384254	7305	7362	0	tp:A:S	cm:i:723	s1:i:7305
scaffold_58	130287	12	130273	+	scaffold_3	3740466	383997	387227	130219	130270	60	tp:A:P	cm:i:13026	s1:i:130217			rl:i:0
scaffold_562	6839	9	6829	+	scaffold_3	3740466	387195	394459	6795	6820	60	tp:A:P	cm:i:674	s1:i:6795			rl:i:0
scaffold_557	7264	12	7264	+	scaffold_3	3740466	393613	405268	7252	7558	60	tp:A:P	cm:i:740	s1:i:7190			rl:i:0
scaffold_529	8400	8	8397	-	scaffold_3	3740466	404852	427980	8334	8392	1	tp:A:P	cm:i:821	s1:i:8334			rl:i:0
scaffold_565	6661	4	6644	-	scaffold_3	3740466	434385	441205	6542	6640	60	tp:A:P	cm:i:657	s1:i:6542			rl:i:57
scaffold_544	8072	3628	8068	-	scaffold_3	3740466	441485	464174	3880	4440	60	tp:A:P	cm:i:384	s1:i:3880			rl:i:19
scaffold_538	7869	6154	7853	-	scaffold_3	3740466	464849	491692	1477	1699	60	tp:A:P	cm:i:146	s1:i:1477			rl:i:0
scaffold_525	8563	9	8553	-	scaffold_3	3740466	491610	672732	8526	8652	60	tp:A:P	cm:i:857	s1:i:8503			rl:i:0
scaffold_526	8583	15	8578	-	scaffold_3	3740466	672708	703890	8534	8789	60	tp:A:P	cm:i:837	s1:i:8489			rl:i:0
scaffold_55	132733	11	132721	+	scaffold_3	3740466	704104	719401	132680	132711	60	tp:A:P	cm:i:13324	s1:i:132678			rl:i:0
scaffold_548	7371	0	7362	+	scaffold_3	3740466	718920	722776	7338	7362	1	tp:A:P	cm:i:727	s1:i:7338			rl:i:0
scaffold_548	7371	0	7362	-	scaffold_3	3740466	722715	723820	7315	7363	0	tp:A:S	cm:i:721	s1:i:7315
scaffold_555	7214	0	7208	+	scaffold_3	3740466	725167	737881	7182	7208	0	tp:A:P	cm:i:720	s1:i:7182			rl:i:0
scaffold_533	8189	14	8189	+	scaffold_3	3740466	737886	933121	8175	8175	60	tp:A:P	cm:i:792	s1:i:8175			rl:i:0
scaffold_553	7442	16	7425	-	scaffold_3	3740466	932830	945872	6480	7409	60	tp:A:P	cm:i:610	s1:i:6370			rl:i:0
scaffold_576	6327	5	6315	-	scaffold_3	3740466	946058	1069526	6310	6310	60	tp:A:P	cm:i:644	s1:i:6310			rl:i:0
scaffold_555	7214	0	7208	-	scaffold_3	3740466	1069836	1082200	7169	7208	0	tp:A:S	cm:i:719	s1:i:7169
scaffold_570	6637	0	6627	-	scaffold_3	3740466	1090213	1095821	6627	6627	60	tp:A:P	cm:i:675	s1:i:6627			rl:i:0
scaffold_544	8072	7	3492	-	scaffold_3	3740466	1095643	1117817	3270	3485	60	tp:A:P	cm:i:311	s1:i:3270			rl:i:19
scaffold_59	129681	8	129665	+	scaffold_3	3740466	1125086	1126810	129599	129658	60	tp:A:P	cm:i:12930	s1:i:129596			rl:i:0
scaffold_556	7195	6	7195	+	scaffold_3	3740466	1128855	1140552	7168	7189	60	tp:A:P	cm:i:712	s1:i:7168			rl:i:0
scaffold_516	9065	4	9051	-	scaffold_3	3740466	1140617	1226844	9047	9047	60	tp:A:P	cm:i:922	s1:i:9047			rl:i:0
scaffold_518	8891	6	8888	+	scaffold_3	3740466	1226545	1398308	8882	8882	60	tp:A:P	cm:i:900	s1:i:8882			rl:i:0
scaffold_519	8833	4	8818	+	scaffold_3	3740466	1393712	1525926	8812	8814	60	tp:A:P	cm:i:864	s1:i:8812			rl:i:19
scaffold_588	10711	5210	10710	+	scaffold_3	3740466	1398191	1400050	5451	5500	60	tp:A:P	cm:i:545	s1:i:5451			rl:i:0
scaffold_569	6637	6	6624	-	scaffold_3	3740466	1532688	1662958	6607	6618	60	tp:A:P	cm:i:647	s1:i:6607			rl:i:28
scaffold_591	5673	6	5657	-	scaffold_3	3740466	1669200	1670872	5623	5657	60	tp:A:P	cm:i:538	s1:i:5621			rl:i:57
scaffold_582	5892	8	5892	-	scaffold_3	3740466	1672261	1675105	5846	5885	60	tp:A:P	cm:i:580	s1:i:5846			rl:i:0
scaffold_520	8827	8	8811	+	scaffold_3	3740466	1678332	1681408	8663	8803	60	tp:A:P	cm:i:850	s1:i:8663			rl:i:0
scaffold_53	133216	4	133202	+	scaffold_3	3740466	1688173	1727681	133111	133203	60	tp:A:P	cm:i:13291	s1:i:133108			rl:i:0
scaffold_521	8652	6	8624	-	scaffold_3	3740466	1728991	1792799	8595	8618	60	tp:A:P	cm:i:874	s1:i:8595			rl:i:57
scaffold_584	6050	2	6042	+	scaffold_3	3740466	1792501	1910580	6040	6040	60	tp:A:P	cm:i:598	s1:i:6040			rl:i:0
scaffold_559	6998	2	6991	-	scaffold_3	3740466	1910680	1924282	6979	6989	60	tp:A:P	cm:i:719	s1:i:6979			rl:i:0
scaffold_61	126888	5	126879	-	scaffold_3	3740466	1930981	2019040	126796	126880	60	tp:A:P	cm:i:12711	s1:i:126783			rl:i:0
scaffold_580	6062	10	6054	-	scaffold_3	3740466	2019578	2022558	6044	6044	60	tp:A:P	cm:i:614	s1:i:6044			rl:i:0
scaffold_56	131603	107727	131601	+	scaffold_3	3740466	2046950	2056249	23832	23876	60	tp:A:P	cm:i:2415	s1:i:23832			rl:i:0
scaffold_595	5492	11	5485	+	scaffold_3	3740466	2058822	2060248	5470	5474	0	tp:A:S	cm:i:539	s1:i:5470
scaffold_573	6502	8	6494	+	scaffold_3	3740466	2061228	2065397	6486	6486	60	tp:A:P	cm:i:646	s1:i:6486			rl:i:0
scaffold_583	5921	7	5910	-	scaffold_3	3740466	2068308	2071073	5903	5903	60	tp:A:P	cm:i:587	s1:i:5903			rl:i:22
scaffold_606	5091	9	5082	+	scaffold_3	3740466	2072239	2073247	5073	5073	60	tp:A:P	cm:i:502	s1:i:5073			rl:i:0
scaffold_592	5628	10	5614	+	scaffold_3	3740466	2073371	2074998	5587	5606	60	tp:A:P	cm:i:548	s1:i:5587			rl:i:0
scaffold_599	6521	1761	6515	+	scaffold_3	3740466	2081760	2083152	4403	4754	60	tp:A:P	cm:i:443	s1:i:4403			rl:i:0
scaffold_564	6801	16	6796	-	scaffold_3	3740466	2083249	2090336	6767	6780	60	tp:A:P	cm:i:678	s1:i:6767			rl:i:0
scaffold_581	6015	2154	6015	+	scaffold_3	3740466	2130008	2132923	3785	3861	60	tp:A:P	cm:i:361	s1:i:3785			rl:i:0
scaffold_586	5844	5	5843	+	scaffold_3	3740466	2132943	2135298	5833	5838	60	tp:A:P	cm:i:586	s1:i:5833			rl:i:0
scaffold_585	5861	8	5844	+	scaffold_3	3740466	2135552	2137984	5836	5836	60	tp:A:P	cm:i:581	s1:i:5836			rl:i:0
scaffold_587	5889	16	3434	+	scaffold_3	3740466	2148007	2150140	3403	3418	60	tp:A:P	cm:i:330	s1:i:3402			rl:i:0
scaffold_563	6809	15	6809	-	scaffold_3	3740466	2150590	2157794	6726	6795	60	tp:A:P	cm:i:665	s1:i:6726			rl:i:0
scaffold_561	6867	13	6863	-	scaffold_3	3740466	2173034	2306223	6826	6850	60	tp:A:P	cm:i:704	s1:i:6826			rl:i:57
scaffold_529	8400	8	8397	-	scaffold_3	3740466	2307498	2326068	8291	8391	0	tp:A:S	cm:i:814	s1:i:8291
scaffold_523	8792	2245	8781	+	scaffold_3	3740466	2326418	2327671	5072	6540	60	tp:A:P	cm:i:486	s1:i:5072			rl:i:0
scaffold_566	6717	14	6705	+	scaffold_3	3740466	2328380	2458709	6691	6691	60	tp:A:P	cm:i:655	s1:i:6691			rl:i:0
scaffold_531	8300	12	8292	-	scaffold_3	3740466	2458732	2498095	8280	8280	60	tp:A:P	cm:i:821	s1:i:8280			rl:i:0
scaffold_524	8629	17	8628	+	scaffold_3	3740466	2498772	2552839	8581	8611	60	tp:A:P	cm:i:860	s1:i:8581			rl:i:0
scaffold_607	5042	9	5038	-	scaffold_3	3740466	2559323	2560348	5029	5029	60	tp:A:P	cm:i:506	s1:i:5029			rl:i:0
scaffold_554	7286	14	7278	+	scaffold_3	3740466	2560514	2573480	7264	7264	60	tp:A:P	cm:i:713	s1:i:7264			rl:i:0
scaffold_596	5490	12	5484	-	scaffold_3	3740466	2582420	2583866	5470	5472	60	tp:A:P	cm:i:560	s1:i:5470			rl:i:22
scaffold_578	6191	1	6187	-	scaffold_3	3740466	2587623	2591016	6170	6187	60	tp:A:P	cm:i:612	s1:i:6170			rl:i:0
scaffold_541	7743	2	7738	-	scaffold_3	3740466	2596121	2619074	7724	7736	60	tp:A:P	cm:i:748	s1:i:7723			rl:i:0
scaffold_537	7881	24	7869	-	scaffold_3	3740466	2637651	2667377	7845	7845	60	tp:A:P	cm:i:784	s1:i:7845			rl:i:38
scaffold_568	6698	12	6690	+	scaffold_3	3740466	2667293	2673842	6665	6678	60	tp:A:P	cm:i:678	s1:i:6665			rl:i:0
scaffold_597	5479	18	5472	+	scaffold_3	3740466	2675007	2676450	5430	5454	60	tp:A:P	cm:i:529	s1:i:5430			rl:i:0
scaffold_599	6521	6	1619	+	scaffold_3	3740466	2676489	2677865	1552	1613	60	tp:A:P	cm:i:163	s1:i:1552			rl:i:0
scaffold_609	4917	11	4901	-	scaffold_3	3740466	2677881	2678874	4867	4890	60	tp:A:P	cm:i:489	s1:i:4867			rl:i:0
scaffold_52	140368	0	133730	+	scaffold_3	3740466	2679589	2750841	133712	133863	60	tp:A:P	cm:i:13359	s1:i:133684			rl:i:19
scaffold_56	131603	9	109252	-	scaffold_3	3740466	2759304	2768617	109178	109243	60	tp:A:P	cm:i:10850	s1:i:109178			rl:i:0
scaffold_567	6711	12	6693	-	scaffold_3	3740466	2768330	2774901	6681	6681	60	tp:A:P	cm:i:655	s1:i:6681			rl:i:0
scaffold_601	6593	3	3568	-	scaffold_3	3740466	2778400	2779531	3539	3565	60	tp:A:P	cm:i:353	s1:i:3539			rl:i:0
scaffold_579	6195	2	6182	-	scaffold_3	3740466	2782495	2785736	6180	6180	60	tp:A:P	cm:i:621	s1:i:6180			rl:i:0
scaffold_601	6593	3730	6577	-	scaffold_3	3740466	2788378	2789508	1899	2847	60	tp:A:P	cm:i:184	s1:i:1859			rl:i:0
scaffold_532	8352	5387	8348	+	scaffold_3	3740466	2793247	2830987	2902	2961	9	tp:A:P	cm:i:289	s1:i:2902			rl:i:0
scaffold_603	5164	1	5153	+	scaffold_3	3740466	2831859	2832930	5132	5152	60	tp:A:P	cm:i:507	s1:i:5132			rl:i:0
scaffold_552	7234	14	7231	-	scaffold_3	3740466	2836598	2849673	7205	7217	60	tp:A:P	cm:i:712	s1:i:7205			rl:i:0
scaffold_555	7214	0	7208	-	scaffold_3	3740466	2849953	2862160	7141	7211	0	tp:A:S	cm:i:714	s1:i:7141
scaffold_594	5527	0	5511	-	scaffold_3	3740466	2862695	2927634	5511	5511	60	tp:A:P	cm:i:555	s1:i:5511			rl:i:0
scaffold_57	131868	6	1402	-	scaffold_3	3740466	2927820	2933656	1381	1398	60	tp:A:P	cm:i:134	s1:i:1381			rl:i:0
scaffold_595	5492	11	5485	+	scaffold_3	3740466	2933583	2971985	5470	5474	0	tp:A:P	cm:i:539	s1:i:5470			rl:i:0
scaffold_528	8413	6	8398	-	scaffold_3	3740466	2971616	3013105	8390	8400	60	tp:A:P	cm:i:834	s1:i:8388			rl:i:0
scaffold_523	8792	14	5159	-	scaffold_3	3740466	3013201	3068628	4900	5145	60	tp:A:P	cm:i:472	s1:i:4900			rl:i:0
scaffold_572	6555	0	6549	-	scaffold_3	3740466	3075132	3079643	6491	6549	60	tp:A:P	cm:i:633	s1:i:6491			rl:i:0
scaffold_532	8352	5387	8348	-	scaffold_3	3740466	3079321	3093058	2815	2968	0	tp:A:S	cm:i:276	s1:i:2813
scaffold_605	5118	9	5103	-	scaffold_3	3740466	3093512	3094576	5018	5094	60	tp:A:P	cm:i:493	s1:i:5018			rl:i:0
scaffold_6	387308	2	387291	-	scaffold_3	3740466	3103652	3105034	387232	387293	60	tp:A:P	cm:i:38879	s1:i:387232			rl:i:0
scaffold_581	6015	10	2586	-	scaffold_3	3740466	3105029	3107939	2440	2576	60	tp:A:P	cm:i:234	s1:i:2440			rl:i:0
scaffold_60	128448	4	128445	+	scaffold_3	3740466	3111835	3113118	128333	128443	60	tp:A:P	cm:i:12847	s1:i:128333			rl:i:0
scaffold_589	5734	5	5729	+	scaffold_3	3740466	3113127	3114908	5724	5724	60	tp:A:P	cm:i:566	s1:i:5724			rl:i:0
scaffold_590	5660	14	5649	+	scaffold_3	3740466	3117405	3119120	5635	5635	60	tp:A:P	cm:i:544	s1:i:5635			rl:i:0
scaffold_57	131868	1534	131861	+	scaffold_3	3740466	3121862	3127765	130305	130332	60	tp:A:P	cm:i:13114	s1:i:130304			rl:i:0
scaffold_608	5243	12	5230	+	scaffold_3	3740466	3131446	3132447	4943	5218	60	tp:A:P	cm:i:495	s1:i:4897			rl:i:0
scaffold_598	5475	8	5470	-	scaffold_3	3740466	3133817	3135239	5442	5462	60	tp:A:P	cm:i:528	s1:i:5442			rl:i:0
scaffold_549	7294	11	7293	+	scaffold_3	3740466	3148326	3166023	7264	7282	60	tp:A:P	cm:i:746	s1:i:7264			rl:i:0
scaffold_547	7394	7	7394	+	scaffold_3	3740466	3172473	3189706	7279	7387	60	tp:A:P	cm:i:729	s1:i:7279			rl:i:0
scaffold_587	5889	3052	5874	+	scaffold_3	3740466	3189671	3191686	2615	2822	60	tp:A:P	cm:i:260	s1:i:2614			rl:i:0
scaffold_600	5436	18	5426	+	scaffold_3	3740466	3192004	3193195	5408	5408	60	tp:A:P	cm:i:534	s1:i:5408			rl:i:0
scaffold_593	5612	2	5610	-	scaffold_3	3740466	3196181	3197627	5573	5608	60	tp:A:P	cm:i:549	s1:i:5573			rl:i:0
scaffold_602	5242	4	5226	+	scaffold_3	3740466	3197649	3198796	5222	5222	60	tp:A:P	cm:i:515	s1:i:5222			rl:i:0
scaffold_530	8393	3	8373	-	scaffold_3	3740466	3198866	3238325	8363	8370	60	tp:A:P	cm:i:811	s1:i:8363			rl:i:31
scaffold_532	8352	2	4570	+	scaffold_3	3740466	3238183	3275962	4568	4568	60	tp:A:P	cm:i:449	s1:i:4568			rl:i:0
scaffold_52	140368	135808	140353	+	scaffold_3	3740466	3276106	3344153	4543	4545	60	tp:A:P	cm:i:435	s1:i:4543			rl:i:19
scaffold_577	6312	2	6310	-	scaffold_3	3740466	3344134	3467657	6308	6308	60	tp:A:P	cm:i:626	s1:i:6308			rl:i:0
scaffold_545	7411	6	7411	+	scaffold_3	3740466	3467355	3489204	7405	7405	60	tp:A:P	cm:i:734	s1:i:7405			rl:i:0
scaffold_571	6588	13	6584	-	scaffold_3	3740466	3489315	3617756	6562	6571	60	tp:A:P	cm:i:645	s1:i:6562			rl:i:0
scaffold_539	7806	15	7802	-	scaffold_3	3740466	3624614	3649584	7678	7787	60	tp:A:P	cm:i:779	s1:i:7678			rl:i:0
scaffold_543	7512	9	7510	+	scaffold_3	3740466	3649266	3671983	7501	7501	60	tp:A:P	cm:i:751	s1:i:7501			rl:i:0
scaffold_527	8444	10	8428	+	scaffold_3	3740466	3672306	3716170	8346	8436	1	tp:A:P	cm:i:847	s1:i:8341			rl:i:0
scaffold_558	7099	7	7094	-	scaffold_3	3740466	3726160	3735841	7087	7087	60	tp:A:P	cm:i:710	s1:i:7087			rl:i:0
scaffold_610	6421	13	6370	+	scaffold_31	7943	3137	3221	3701	6357	60	tp:A:P	cm:i:350	s1:i:3582			rl:i:0
scaffold_643	3922	15	3922	-	scaffold_4	3721636	11652	13148	3907	3907	1	tp:A:P	cm:i:378	s1:i:3907			rl:i:0
scaffold_675	3184	6	3180	+	scaffold_4	3721636	13161	14188	3174	3174	60	tp:A:P	cm:i:313	s1:i:3174			rl:i:0
scaffold_621	4256	0	4250	+	scaffold_4	3721636	20567	74692	4018	4254	0	tp:A:S	cm:i:403	s1:i:4018
scaffold_628	4109	10	4097	-	scaffold_4	3721636	74931	80567	4085	4087	60	tp:A:P	cm:i:399	s1:i:4085			rl:i:19
scaffold_636	4049	2989	4043	-	scaffold_4	3721636	82146	83251	989	1054	0	tp:A:S	cm:i:93	s1:i:989
scaffold_636	4049	2989	4043	-	scaffold_4	3721636	83419	95941	1054	1054	17	tp:A:P	cm:i:107	s1:i:1054			rl:i:0
scaffold_642	3907	9	3906	-	scaffold_4	3721636	96251	106637	3881	3897	60	tp:A:P	cm:i:389	s1:i:3881			rl:i:0
scaffold_64	123531	5	123528	+	scaffold_4	3721636	106838	122315	123493	123527	60	tp:A:P	cm:i:12267	s1:i:123493			rl:i:0
scaffold_645	3848	15	3843	+	scaffold_4	3721636	122360	129765	3828	3828	60	tp:A:P	cm:i:372	s1:i:3828			rl:i:0
scaffold_67	120384	12	120378	-	scaffold_4	3721636	130058	131318	120282	120369	60	tp:A:P	cm:i:11972	s1:i:120280			rl:i:0
scaffold_632	3957	8	3943	+	scaffold_4	3721636	135384	161743	3935	3935	60	tp:A:P	cm:i:394	s1:i:3935			rl:i:0
scaffold_657	3439	1	3428	-	scaffold_4	3721636	162887	165426	3427	3427	60	tp:A:P	cm:i:331	s1:i:3427			rl:i:0
scaffold_662	3329	1	3312	-	scaffold_4	3721636	167130	169043	3229	3311	60	tp:A:P	cm:i:310	s1:i:3229			rl:i:19
scaffold_621	4256	0	4250	-	scaffold_4	3721636	169679	230190	4224	4252	3	tp:A:P	cm:i:430	s1:i:4224			rl:i:0
scaffold_634	3755	2900	3740	+	scaffold_4	3721636	230182	251130	717	840	17	tp:A:P	cm:i:67	s1:i:717			rl:i:0
scaffold_639	3917	17	3900	+	scaffold_4	3721636	252382	269591	3883	3883	60	tp:A:P	cm:i:374	s1:i:3883			rl:i:0
scaffold_678	3092	8	3088	-	scaffold_4	3721636	269792	360877	3068	3080	1	tp:A:P	cm:i:296	s1:i:3068			rl:i:0
scaffold_633	4032	8	4017	-	scaffold_4	3721636	360899	390588	3995	4010	4	tp:A:P	cm:i:399	s1:i:3995			rl:i:0
scaffold_676	3099	14	3082	-	scaffold_4	3721636	391192	392171	3068	3068	60	tp:A:P	cm:i:309	s1:i:3068			rl:i:0
scaffold_672	3208	7	3206	-	scaffold_4	3721636	392203	393385	3195	3199	60	tp:A:P	cm:i:322	s1:i:3195			rl:i:19
scaffold_654	3336	8	3320	-	scaffold_4	3721636	398158	401236	3253	3312	60	tp:A:P	cm:i:316	s1:i:3240			rl:i:0
scaffold_668	3312	12	3307	+	scaffold_4	3721636	402234	403557	3295	3295	60	tp:A:P	cm:i:323	s1:i:3295			rl:i:0
scaffold_671	3213	18	3195	-	scaffold_4	3721636	403992	405198	3163	3177	60	tp:A:P	cm:i:307	s1:i:3163			rl:i:0
scaffold_665	3336	13	3330	+	scaffold_4	3721636	405208	406710	3309	3317	60	tp:A:P	cm:i:315	s1:i:3309			rl:i:19
scaffold_651	3518	7	3500	+	scaffold_4	3721636	415474	419025	3493	3493	60	tp:A:P	cm:i:354	s1:i:3493			rl:i:0
scaffold_670	3243	9	3239	-	scaffold_4	3721636	419438	420665	3230	3230	60	tp:A:P	cm:i:332	s1:i:3230			rl:i:0
scaffold_640	3954	3	3948	-	scaffold_4	3721636	420786	432605	3837	3945	60	tp:A:P	cm:i:385	s1:i:3837			rl:i:0
scaffold_66	123112	15	123104	+	scaffold_4	3721636	433826	436036	122764	123537	60	tp:A:P	cm:i:12287	s1:i:122672			rl:i:0
scaffold_619	4285	18	4282	-	scaffold_4	3721636	439179	482790	4229	4264	60	tp:A:P	cm:i:412	s1:i:4229			rl:i:0
scaffold_613	4680	13	4669	+	scaffold_4	3721636	482983	563211	4631	4656	60	tp:A:P	cm:i:452	s1:i:4631			rl:i:0
scaffold_656	3441	0	3430	-	scaffold_4	3721636	563317	565955	3430	3430	60	tp:A:P	cm:i:341	s1:i:3430			rl:i:0
scaffold_624	4210	1	4200	+	scaffold_4	3721636	578565	630130	4199	4199	60	tp:A:P	cm:i:426	s1:i:4199			rl:i:0
scaffold_621	4256	0	4250	+	scaffold_4	3721636	629901	689083	4177	4250	0	tp:A:S	cm:i:429	s1:i:4177
scaffold_663	3349	30	3346	-	scaffold_4	3721636	688757	690397	3312	3316	60	tp:A:P	cm:i:332	s1:i:3312			rl:i:38
scaffold_620	4270	3	4270	+	scaffold_4	3721636	690099	752750	4267	4267	60	tp:A:P	cm:i:434	s1:i:4267			rl:i:0
scaffold_631	3999	5	3995	-	scaffold_4	3721636	753169	762967	3990	3990	60	tp:A:P	cm:i:396	s1:i:3990			rl:i:0
scaffold_630	4022	14	4008	-	scaffold_4	3721636	762670	777737	3924	3994	60	tp:A:P	cm:i:383	s1:i:3924			rl:i:0
scaffold_612	4682	6	4678	-	scaffold_4	3721636	779036	855597	4643	4673	60	tp:A:P	cm:i:448	s1:i:4643			rl:i:0
scaffold_62	124969	2	124958	+	scaffold_4	3721636	855603	919757	124905	124957	60	tp:A:P	cm:i:12531	s1:i:124905			rl:i:0
scaffold_666	3334	13	3318	-	scaffold_4	3721636	934401	935826	3279	3305	60	tp:A:P	cm:i:322	s1:i:3279			rl:i:0
scaffold_646	3735	12	3731	+	scaffold_4	3721636	940281	944141	3710	3719	0	tp:A:S	cm:i:358	s1:i:3710
scaffold_658	3427	2	3424	+	scaffold_4	3721636	944149	946674	3410	3422	60	tp:A:P	cm:i:329	s1:i:3410			rl:i:19
scaffold_617	4337	15	4336	+	scaffold_4	3721636	951127	962065	4321	4321	60	tp:A:P	cm:i:444	s1:i:4321			rl:i:0
scaffold_634	3755	2900	3740	-	scaffold_4	3721636	968589	989345	668	840	0	tp:A:S	cm:i:60	s1:i:668
scaffold_616	4389	17	4386	-	scaffold_4	3721636	989358	1045058	4369	4369	60	tp:A:P	cm:i:441	s1:i:4369			rl:i:0
scaffold_618	4294	18	4288	-	scaffold_4	3721636	1045561	1333968	4189	4270	60	tp:A:P	cm:i:420	s1:i:4189			rl:i:0
scaffold_637	4007	9	3997	-	scaffold_4	3721636	1340200	1834983	3947	3990	60	tp:A:P	cm:i:388	s1:i:3947			rl:i:0
scaffold_635	4011	17	4010	+	scaffold_4	3721636	1834674	1855124	3993	3993	60	tp:A:P	cm:i:400	s1:i:3993			rl:i:0
scaffold_649	3645	17	3639	-	scaffold_4	3721636	1855143	2242433	3622	3622	60	tp:A:P	cm:i:349	s1:i:3622			rl:i:0
scaffold_661	3356	3	3346	+	scaffold_4	3721636	2245145	2247128	3341	3343	60	tp:A:P	cm:i:325	s1:i:3341			rl:i:19
scaffold_650	3574	11	3563	-	scaffold_4	3721636	2248945	2253209	3552	3552	0	tp:A:P	cm:i:353	s1:i:3552			rl:i:0
scaffold_646	3735	12	3731	-	scaffold_4	3721636	2254071	2260866	3719	3719	0	tp:A:P	cm:i:361	s1:i:3719			rl:i:0
scaffold_65	123492	12	123479	+	scaffold_4	3721636	2263130	2268203	123428	123468	60	tp:A:P	cm:i:12359	s1:i:123428			rl:i:0
scaffold_667	3319	13	3316	+	scaffold_4	3721636	2268498	2269891	3287	3305	0	tp:A:P	cm:i:333	s1:i:3287			rl:i:0
scaffold_674	3134	16	3130	-	scaffold_4	3721636	2269847	2270893	2949	3114	60	tp:A:P	cm:i:282	s1:i:2949			rl:i:0
scaffold_629	4026	11	4009	+	scaffold_4	3721636	2280326	2292906	3998	3998	60	tp:A:P	cm:i:405	s1:i:3998			rl:i:0
scaffold_648	3655	12	3639	-	scaffold_4	3721636	2294599	2296212	3627	3627	60	tp:A:P	cm:i:366	s1:i:3627			rl:i:0
scaffold_669	3266	18	3259	+	scaffold_4	3721636	2296193	2297440	3218	3241	60	tp:A:P	cm:i:318	s1:i:3218			rl:i:0
scaffold_664	3340	8	3325	+	scaffold_4	3721636	2297454	2298908	3317	3317	60	tp:A:P	cm:i:328	s1:i:3317			rl:i:0
scaffold_627	4119	4	4115	-	scaffold_4	3721636	2304693	2524206	3885	4116	60	tp:A:P	cm:i:375	s1:i:3880			rl:i:0
scaffold_647	3668	2	3662	-	scaffold_4	3721636	2524363	2529835	3645	3660	60	tp:A:P	cm:i:366	s1:i:3645			rl:i:0
scaffold_615	4559	29	4539	+	scaffold_4	3721636	2530245	2602614	4487	4511	60	tp:A:P	cm:i:452	s1:i:4487			rl:i:57
scaffold_641	3917	0	3901	+	scaffold_4	3721636	2602346	2613732	3901	3901	60	tp:A:P	cm:i:390	s1:i:3901			rl:i:0
scaffold_621	4256	0	4250	-	scaffold_4	3721636	2613744	2616150	4021	4254	0	tp:A:S	cm:i:405	s1:i:4021
scaffold_63	124230	52206	124218	+	scaffold_4	3721636	2616573	2655951	71902	72013	60	tp:A:P	cm:i:7235	s1:i:71902			rl:i:0
scaffold_614	4637	9	4629	-	scaffold_4	3721636	2655843	2947890	4602	4620	0	tp:A:S	cm:i:450	s1:i:4602
scaffold_660	3408	15	3408	+	scaffold_4	3721636	2947992	3058303	3393	3393	60	tp:A:P	cm:i:325	s1:i:3393			rl:i:0
scaffold_611	4840	15	4824	-	scaffold_4	3721636	3061003	3147719	4721	4809	60	tp:A:P	cm:i:457	s1:i:4721			rl:i:0
scaffold_614	4637	9	4629	-	scaffold_4	3721636	3147591	3221854	4617	4620	0	tp:A:P	cm:i:450	s1:i:4617			rl:i:0
scaffold_650	3574	11	3563	+	scaffold_4	3721636	3227327	3274325	3536	3552	0	tp:A:S	cm:i:352	s1:i:3536
scaffold_636	4049	0	2534	-	scaffold_4	3721636	3277727	3277780	2488	2534	60	tp:A:P	cm:i:248	s1:i:2488			rl:i:0
scaffold_650	3574	11	3563	-	scaffold_4	3721636	3279536	3351549	3549	3552	0	tp:A:S	cm:i:352	s1:i:3549
scaffold_625	4179	5	4174	+	scaffold_4	3721636	3351243	3396813	4169	4169	60	tp:A:P	cm:i:412	s1:i:4169			rl:i:0
scaffold_621	4256	0	4250	+	scaffold_4	3721636	3396452	3410148	4169	4253	0	tp:A:S	cm:i:426	s1:i:4169
scaffold_623	4212	15	4197	-	scaffold_4	3721636	3396456	3396619	4182	4182	60	tp:A:P	cm:i:408	s1:i:4182			rl:i:0
scaffold_633	4032	8	4017	+	scaffold_4	3721636	3410221	3438316	3946	4009	0	tp:A:S	cm:i:390	s1:i:3946
scaffold_643	3922	15	3922	-	scaffold_4	3721636	3437979	3446638	3884	3907	0	tp:A:S	cm:i:375	s1:i:3884
scaffold_667	3319	13	3316	-	scaffold_4	3721636	3472389	3473771	3285	3303	0	tp:A:S	cm:i:331	s1:i:3285
scaffold_653	3540	2	3529	-	scaffold_4	3721636	3476523	3479840	3527	3527	60	tp:A:P	cm:i:361	s1:i:3527			rl:i:0
scaffold_659	3424	12	3410	+	scaffold_4	3721636	3480829	3483117	3398	3403	60	tp:A:P	cm:i:319	s1:i:3397			rl:i:0
scaffold_638	3951	5	3951	+	scaffold_4	3721636	3483331	3501422	3946	3946	60	tp:A:P	cm:i:398	s1:i:3946			rl:i:0
scaffold_634	3755	18	1067	+	scaffold_4	3721636	3501740	3524088	775	1051	0	tp:A:S	cm:i:65	s1:i:773
scaffold_677	3036	4	3035	-	scaffold_4	3721636	3524043	3525039	3031	3031	60	tp:A:P	cm:i:303	s1:i:3031			rl:i:0
scaffold_644	3866	18	3864	+	scaffold_4	3721636	3524876	3533528	3846	3846	60	tp:A:P	cm:i:379	s1:i:3846			rl:i:0
scaffold_652	3557	7	3549	-	scaffold_4	3721636	3540891	3544318	3542	3542	60	tp:A:P	cm:i:336	s1:i:3542			rl:i:0
scaffold_634	3755	18	1067	-	scaffold_4	3721636	3544225	3570292	907	1049	40	tp:A:P	cm:i:86	s1:i:907			rl:i:0
scaffold_655	3205	5	3198	-	scaffold_4	3721636	3571176	3573916	3185	3193	60	tp:A:P	cm:i:323	s1:i:3185			rl:i:0
scaffold_63	124230	1	46995	+	scaffold_4	3721636	3574082	3613197	46927	46998	60	tp:A:P	cm:i:4677	s1:i:46926			rl:i:0
scaffold_626	4153	15	4150	-	scaffold_4	3721636	3613342	3657114	4135	4135	60	tp:A:P	cm:i:400	s1:i:4135			rl:i:0
scaffold_622	4235	0	4218	+	scaffold_4	3721636	3657788	3711229	4218	4218	60	tp:A:P	cm:i:404	s1:i:4218			rl:i:0
scaffold_673	3196	8	3178	-	scaffold_4	3721636	3714187	3715294	3101	3170	0	tp:A:S	cm:i:299	s1:i:3101
scaffold_673	3196	8	3178	+	scaffold_4	3721636	3716735	3717923	3170	3170	7	tp:A:P	cm:i:307	s1:i:3170			rl:i:0
scaffold_681	3044	11	3035	+	scaffold_5	3444717	19260	66294	3024	3024	60	tp:A:P	cm:i:296	s1:i:3024			rl:i:0
scaffold_684	2968	2872	2956	-	scaffold_5	3444717	66064	126675	61	84	0	tp:A:S	cm:i:4	s1:i:61
scaffold_684	2968	2872	2956	+	scaffold_5	3444717	126268	297644	61	84	0	tp:A:S	cm:i:4	s1:i:61
scaffold_684	2968	2872	2956	+	scaffold_5	3444717	297834	301327	61	84	0	tp:A:S	cm:i:4	s1:i:61
scaffold_684	2968	2872	2956	+	scaffold_5	3444717	301920	303988	61	84	0	tp:A:S	cm:i:4	s1:i:61
scaffold_684	2968	2872	2956	+	scaffold_5	3444717	304158	307126	61	84	0	tp:A:S	cm:i:4	s1:i:61
scaffold_68	120248	12	120234	-	scaffold_5	3444717	344026	422557	120190	120224	60	tp:A:P	cm:i:12095	s1:i:120190			rl:i:0
scaffold_684	2968	2872	2956	-	scaffold_5	3444717	424056	534826	61	84	0	tp:A:S	cm:i:4	s1:i:61
scaffold_684	2968	2872	2956	-	scaffold_5	3444717	534743	559442	61	84	0	tp:A:S	cm:i:4	s1:i:61
scaffold_684	2968	2872	2956	-	scaffold_5	3444717	559166	574085	61	84	0	tp:A:S	cm:i:4	s1:i:61
scaffold_684	2968	2872	2956	-	scaffold_5	3444717	573792	727783	61	84	0	tp:A:S	cm:i:4	s1:i:61
scaffold_679	3012	16	2995	-	scaffold_5	3444717	727423	1036664	2967	2980	60	tp:A:P	cm:i:307	s1:i:2967			rl:i:0
scaffold_684	2968	2872	2956	-	scaffold_5	3444717	1036362	1061276	61	84	0	tp:A:S	cm:i:4	s1:i:61
scaffold_684	2968	2872	2956	-	scaffold_5	3444717	1061336	1082788	61	84	0	tp:A:S	cm:i:4	s1:i:61
scaffold_684	2968	2872	2956	+	scaffold_5	3444717	1082761	1227050	61	84	0	tp:A:S	cm:i:4	s1:i:61
scaffold_678	3092	8	3088	+	scaffold_5	3444717	1227115	1310350	3054	3080	0	tp:A:S	cm:i:295	s1:i:3054
scaffold_684	2968	2872	2956	-	scaffold_5	3444717	1310053	1454393	61	84	0	tp:A:S	cm:i:4	s1:i:61
scaffold_684	2968	2872	2956	+	scaffold_5	3444717	1454835	2027919	61	84	0	tp:A:S	cm:i:4	s1:i:61
scaffold_684	2968	2872	2956	+	scaffold_5	3444717	2028275	2314437	61	84	0	tp:A:P	cm:i:4	s1:i:61			rl:i:95
scaffold_684	2968	2872	2956	-	scaffold_5	3444717	2315616	2368174	61	84	0	tp:A:S	cm:i:4	s1:i:61
scaffold_680	3062	8	3061	-	scaffold_5	3444717	2368305	2405438	3053	3053	60	tp:A:P	cm:i:301	s1:i:3053			rl:i:0
scaffold_684	2968	2872	2956	+	scaffold_5	3444717	2405359	2406409	61	84	0	tp:A:S	cm:i:4	s1:i:61
scaffold_684	2968	2872	2956	-	scaffold_5	3444717	2408252	2450148	61	84	0	tp:A:S	cm:i:4	s1:i:61
scaffold_684	2968	2872	2956	+	scaffold_5	3444717	2451685	2453950	61	84	0	tp:A:S	cm:i:4	s1:i:61
scaffold_684	2968	2872	2956	+	scaffold_5	3444717	2454036	2455115	61	84	0	tp:A:S	cm:i:4	s1:i:61
scaffold_684	2968	2872	2956	-	scaffold_5	3444717	2455036	2463918	61	84	0	tp:A:S	cm:i:4	s1:i:61
scaffold_684	2968	2872	2956	-	scaffold_5	3444717	2466040	2467981	61	84	0	tp:A:S	cm:i:4	s1:i:61
scaffold_684	2968	2872	2956	+	scaffold_5	3444717	2468347	2473376	61	84	0	tp:A:S	cm:i:4	s1:i:61
scaffold_684	2968	2872	2956	+	scaffold_5	3444717	2484160	2485572	61	84	0	tp:A:S	cm:i:4	s1:i:61
scaffold_684	2968	2872	2956	+	scaffold_5	3444717	2486600	2487726	61	84	0	tp:A:S	cm:i:4	s1:i:61
scaffold_684	2968	2872	2956	+	scaffold_5	3444717	2492969	2495641	61	84	0	tp:A:S	cm:i:4	s1:i:61
scaffold_684	2968	2872	2956	-	scaffold_5	3444717	2512707	2513913	61	84	0	tp:A:S	cm:i:4	s1:i:61
scaffold_684	2968	2872	2956	+	scaffold_5	3444717	2525561	2526599	61	84	0	tp:A:S	cm:i:4	s1:i:61
scaffold_684	2968	2872	2956	-	scaffold_5	3444717	2534073	2657085	61	84	0	tp:A:S	cm:i:4	s1:i:61
scaffold_684	2968	2872	2956	+	scaffold_5	3444717	2657187	2666661	61	84	0	tp:A:S	cm:i:4	s1:i:61
scaffold_678	3092	8	3088	+	scaffold_5	3444717	2666456	2749537	3046	3081	0	tp:A:S	cm:i:294	s1:i:3046
scaffold_683	2966	4	2965	-	scaffold_5	3444717	2749395	2763031	2961	2961	60	tp:A:P	cm:i:295	s1:i:2961			rl:i:0
scaffold_682	3032	6	3023	-	scaffold_5	3444717	2762599	2825731	3017	3017	60	tp:A:P	cm:i:304	s1:i:3017			rl:i:0
scaffold_684	2968	2872	2956	-	scaffold_5	3444717	2825646	2827911	61	84	0	tp:A:S	cm:i:4	s1:i:61
scaffold_684	2968	2872	2956	+	scaffold_5	3444717	2827920	2830185	61	84	0	tp:A:S	cm:i:4	s1:i:61
scaffold_684	2968	2872	2956	+	scaffold_5	3444717	2830110	2893590	61	84	0	tp:A:S	cm:i:4	s1:i:61
scaffold_684	2968	2872	2956	-	scaffold_5	3444717	2896384	2897462	61	84	0	tp:A:S	cm:i:4	s1:i:61
scaffold_684	2968	2872	2956	+	scaffold_5	3444717	2900178	2902512	61	84	0	tp:A:S	cm:i:4	s1:i:61
scaffold_684	2968	2872	2956	-	scaffold_5	3444717	2903003	3027956	61	84	0	tp:A:S	cm:i:4	s1:i:61
scaffold_684	2968	2872	2956	+	scaffold_5	3444717	3028488	3028542	61	84	0	tp:A:S	cm:i:4	s1:i:61
scaffold_684	2968	2872	2956	+	scaffold_5	3444717	3028586	3028640	61	84	0	tp:A:S	cm:i:4	s1:i:61
scaffold_684	2968	2872	2956	+	scaffold_5	3444717	3054023	3093804	61	84	0	tp:A:S	cm:i:4	s1:i:61
scaffold_684	2968	2872	2956	+	scaffold_5	3444717	3054098	3054152	61	84	0	tp:A:S	cm:i:4	s1:i:61
scaffold_684	2968	2872	2956	+	scaffold_5	3444717	3094788	3113704	61	84	0	tp:A:S	cm:i:4	s1:i:61
scaffold_684	2968	2872	2956	-	scaffold_5	3444717	3115512	3117290	61	84	0	tp:A:S	cm:i:4	s1:i:61
scaffold_684	2968	2872	2956	-	scaffold_5	3444717	3117593	3124211	61	84	0	tp:A:S	cm:i:4	s1:i:61
scaffold_684	2968	2872	2956	-	scaffold_5	3444717	3123792	3233033	61	84	0	tp:A:S	cm:i:4	s1:i:61
scaffold_684	2968	2872	2956	+	scaffold_5	3444717	3232927	3280282	61	84	0	tp:A:S	cm:i:4	s1:i:61
scaffold_684	2968	2872	2956	-	scaffold_5	3444717	3287506	3330731	61	84	0	tp:A:S	cm:i:4	s1:i:61
scaffold_684	2968	2872	2956	+	scaffold_5	3444717	3330488	3386069	61	84	0	tp:A:S	cm:i:4	s1:i:61
scaffold_684	2968	2872	2956	+	scaffold_5	3444717	3393115	3410987	61	84	0	tp:A:S	cm:i:4	s1:i:61
scaffold_684	2968	2872	2956	-	scaffold_5	3444717	3410508	3435498	61	84	0	tp:A:S	cm:i:4	s1:i:61
scaffold_691	2855	5	2846	+	scaffold_6	2822236	9319	62798	2841	2841	60	tp:A:P	cm:i:281	s1:i:2841			rl:i:0
scaffold_693	2768	13	2747	+	scaffold_6	2822236	62838	111664	2734	2734	60	tp:A:P	cm:i:284	s1:i:2734			rl:i:19
scaffold_724	2453	17	2449	-	scaffold_6	2822236	117953	122843	2421	2432	0	tp:A:S	cm:i:243	s1:i:2421
scaffold_7	386208	6	386199	+	scaffold_6	2822236	122618	151576	386133	386326	60	tp:A:P	cm:i:38738	s1:i:386107			rl:i:0
scaffold_715	2517	4	2516	+	scaffold_6	2822236	151494	164183	2512	2512	60	tp:A:P	cm:i:245	s1:i:2512			rl:i:0
scaffold_728	2378	14	2370	-	scaffold_6	2822236	164501	167235	2353	2356	0	tp:A:S	cm:i:239	s1:i:2353
scaffold_717	2568	17	2556	+	scaffold_6	2822236	174066	185047	2539	2539	60	tp:A:P	cm:i:256	s1:i:2539			rl:i:0
scaffold_744	2195	0	2188	+	scaffold_6	2822236	186375	187396	2188	2188	60	tp:A:P	cm:i:223	s1:i:2188			rl:i:0
scaffold_735	2300	13	2300	-	scaffold_6	2822236	188293	189863	2287	2287	0	tp:A:S	cm:i:221	s1:i:2287
scaffold_726	2418	8	2400	-	scaffold_6	2822236	190041	193234	2392	2392	60	tp:A:P	cm:i:242	s1:i:2392			rl:i:0
scaffold_704	2597	6	2597	+	scaffold_6	2822236	193894	217373	2591	2591	60	tp:A:P	cm:i:246	s1:i:2591			rl:i:0
scaffold_732	2347	7	2343	+	scaffold_6	2822236	218098	220107	2257	2336	0	tp:A:S	cm:i:229	s1:i:2256
scaffold_701	2663	7	2651	-	scaffold_6	2822236	221220	247869	2644	2644	60	tp:A:P	cm:i:262	s1:i:2644			rl:i:0
scaffold_70	118112	18	118099	+	scaffold_6	2822236	247891	274961	118055	118081	60	tp:A:P	cm:i:11781	s1:i:118055			rl:i:0
scaffold_72	114780	3	114764	-	scaffold_6	2822236	275147	285186	114736	114763	60	tp:A:P	cm:i:11368	s1:i:114736			rl:i:0
scaffold_69	118670	13	118653	+	scaffold_6	2822236	285333	290390	118533	118644	60	tp:A:P	cm:i:11892	s1:i:118533			rl:i:0
scaffold_740	2274	6	2271	+	scaffold_6	2822236	294212	295323	2265	2265	0	tp:A:S	cm:i:234	s1:i:2265
scaffold_699	2673	2	2667	-	scaffold_6	2822236	295342	326173	2545	2665	0	tp:A:S	cm:i:246	s1:i:2545
scaffold_718	2503	12	2497	-	scaffold_6	2822236	326271	591573	2472	2485	60	tp:A:P	cm:i:248	s1:i:2472			rl:i:0
scaffold_684	2968	2872	2956	-	scaffold_6	2822236	591393	632321	61	84	0	tp:A:S	cm:i:4	s1:i:61
scaffold_692	2837	4	2829	+	scaffold_6	2822236	632570	635298	2770	2834	0	tp:A:S	cm:i:259	s1:i:2768
scaffold_705	2603	16	2589	+	scaffold_6	2822236	635644	658234	2573	2573	60	tp:A:P	cm:i:252	s1:i:2573			rl:i:0
scaffold_692	2837	4	2829	+	scaffold_6	2822236	658059	767819	2825	2825	6	tp:A:P	cm:i:270	s1:i:2825			rl:i:0
scaffold_707	2655	8	2646	+	scaffold_6	2822236	768397	932825	2638	2638	60	tp:A:P	cm:i:272	s1:i:2638			rl:i:0
scaffold_709	2645	2	2640	-	scaffold_6	2822236	932991	951307	2638	2638	60	tp:A:P	cm:i:277	s1:i:2638			rl:i:0
scaffold_699	2673	2	2667	+	scaffold_6	2822236	951157	983434	2626	2665	0	tp:A:S	cm:i:255	s1:i:2626
scaffold_713	2591	14	2577	+	scaffold_6	2822236	983371	996840	2563	2563	60	tp:A:P	cm:i:252	s1:i:2563			rl:i:0
scaffold_737	2289	6	2274	-	scaffold_6	2822236	997143	998605	2268	2268	60	tp:A:P	cm:i:216	s1:i:2268			rl:i:0
scaffold_741	2242	17	2227	+	scaffold_6	2822236	998551	999659	2210	2210	60	tp:A:P	cm:i:234	s1:i:2210			rl:i:0
scaffold_738	2280	6	2272	+	scaffold_6	2822236	1010358	1011819	2235	2266	60	tp:A:P	cm:i:210	s1:i:2234			rl:i:19
scaffold_742	2265	8	2253	+	scaffold_6	2822236	1011765	1012874	2245	2245	60	tp:A:P	cm:i:213	s1:i:2245			rl:i:0
scaffold_732	2347	7	2343	-	scaffold_6	2822236	1020710	1022880	2335	2336	10	tp:A:P	cm:i:239	s1:i:2335			rl:i:0
scaffold_735	2300	13	2300	-	scaffold_6	2822236	1023918	1025629	2287	2287	0	tp:A:P	cm:i:221	s1:i:2287			rl:i:0
scaffold_722	2463	16	2463	-	scaffold_6	2822236	1025640	1031948	2447	2447	60	tp:A:P	cm:i:251	s1:i:2447			rl:i:0
scaffold_740	2274	6	2271	+	scaffold_6	2822236	1032730	1033984	2265	2265	0	tp:A:P	cm:i:234	s1:i:2265			rl:i:0
scaffold_725	2448	17	2442	+	scaffold_6	2822236	1035393	1038935	2420	2425	60	tp:A:P	cm:i:253	s1:i:2419			rl:i:0
scaffold_729	2362	11	2345	-	scaffold_6	2822236	1038975	1041619	2334	2334	60	tp:A:P	cm:i:239	s1:i:2334			rl:i:0
scaffold_739	2275	5	2270	-	scaffold_6	2822236	1043043	1044340	2257	2265	60	tp:A:P	cm:i:225	s1:i:2257			rl:i:0
scaffold_728	2378	14	2370	-	scaffold_6	2822236	1044266	1046940	2352	2357	0	tp:A:S	cm:i:240	s1:i:2352
scaffold_734	2303	3	2297	-	scaffold_6	2822236	1048225	1049995	2294	2294	60	tp:A:P	cm:i:242	s1:i:2294			rl:i:0
scaffold_733	2304	11	2299	-	scaffold_6	2822236	1050481	1052323	2288	2288	60	tp:A:P	cm:i:239	s1:i:2288			rl:i:0
scaffold_743	2196	4	2180	-	scaffold_6	2822236	1056490	1057501	2176	2176	60	tp:A:P	cm:i:215	s1:i:2176			rl:i:0
scaffold_716	2510	9	2504	+	scaffold_6	2822236	1067648	1079060	2477	2495	60	tp:A:P	cm:i:243	s1:i:2477			rl:i:0
scaffold_690	2858	5	2849	+	scaffold_6	2822236	1084970	1138880	2844	2844	60	tp:A:P	cm:i:276	s1:i:2844			rl:i:0
scaffold_702	2705	2	2698	+	scaffold_6	2822236	1139016	1164207	2696	2696	60	tp:A:P	cm:i:288	s1:i:2696			rl:i:0
scaffold_700	2723	5	2720	-	scaffold_6	2822236	1164852	1191799	2715	2715	60	tp:A:P	cm:i:276	s1:i:2715			rl:i:0
scaffold_719	2552	17	2544	+	scaffold_6	2822236	1191974	1202157	2488	2527	60	tp:A:P	cm:i:249	s1:i:2488			rl:i:0
scaffold_698	2690	7	2679	-	scaffold_6	2822236	1201834	1412484	2672	2672	60	tp:A:P	cm:i:269	s1:i:2672			rl:i:0
scaffold_699	2673	2	2667	+	scaffold_6	2822236	1413255	1444446	2571	2665	0	tp:A:S	cm:i:242	s1:i:2571
scaffold_727	2393	4	2380	-	scaffold_6	2822236	1444664	1565020	2376	2376	60	tp:A:P	cm:i:237	s1:i:2376			rl:i:0
scaffold_686	2932	5	2924	+	scaffold_6	2822236	1565473	1623844	2839	2919	0	tp:A:S	cm:i:271	s1:i:2839
scaffold_728	2378	14	2370	+	scaffold_6	2822236	1623940	1744162	2355	2356	0	tp:A:P	cm:i:240	s1:i:2355			rl:i:0
scaffold_686	2932	5	2924	-	scaffold_6	2822236	1743658	1809511	2883	2919	0	tp:A:S	cm:i:277	s1:i:2883
scaffold_688	2924	8	2922	-	scaffold_6	2822236	1809472	1851438	2909	2914	5	tp:A:P	cm:i:291	s1:i:2909			rl:i:0
scaffold_703	2632	11	2623	-	scaffold_6	2822236	1851929	1876881	2571	2615	60	tp:A:P	cm:i:264	s1:i:2571			rl:i:0
scaffold_710	2606	6	2598	+	scaffold_6	2822236	1876630	1892834	2592	2592	60	tp:A:P	cm:i:256	s1:i:2592			rl:i:0
scaffold_724	2453	17	2449	+	scaffold_6	2822236	1899486	1904473	2432	2432	1	tp:A:P	cm:i:245	s1:i:2432			rl:i:0
scaffold_745	2185	11	2177	+	scaffold_6	2822236	1904887	1993466	2118	2166	60	tp:A:P	cm:i:206	s1:i:2118			rl:i:0
scaffold_697	2691	13	2687	-	scaffold_6	2822236	1994122	2061714	2659	2674	60	tp:A:P	cm:i:275	s1:i:2659			rl:i:0
scaffold_684	2968	2872	2956	+	scaffold_6	2822236	2062148	2146421	61	84	0	tp:A:S	cm:i:4	s1:i:61
scaffold_720	2536	5	2530	-	scaffold_6	2822236	2146188	2155235	2525	2525	60	tp:A:P	cm:i:245	s1:i:2525			rl:i:0
scaffold_723	2476	13	2471	+	scaffold_6	2822236	2155560	2161217	2458	2458	60	tp:A:P	cm:i:228	s1:i:2458			rl:i:0
scaffold_74	110779	3	110767	-	scaffold_6	2822236	2164540	2165775	110667	110775	60	tp:A:P	cm:i:11004	s1:i:110665			rl:i:0
scaffold_695	2769	3	2769	-	scaffold_6	2822236	2189709	2232977	2766	2766	60	tp:A:P	cm:i:278	s1:i:2766			rl:i:0
scaffold_724	2453	17	2449	-	scaffold_6	2822236	2232902	2237084	2412	2432	0	tp:A:S	cm:i:241	s1:i:2412
scaffold_694	2778	5	2769	+	scaffold_6	2822236	2238077	2286451	2761	2765	60	tp:A:P	cm:i:285	s1:i:2761			rl:i:0
scaffold_688	2924	8	2922	+	scaffold_6	2822236	2289884	2322884	2858	2914	0	tp:A:S	cm:i:282	s1:i:2858
scaffold_689	2899	10	2883	-	scaffold_6	2822236	2322539	2339778	2873	2873	60	tp:A:P	cm:i:272	s1:i:2873			rl:i:0
scaffold_708	2646	2	2641	+	scaffold_6	2822236	2339518	2359928	2639	2639	60	tp:A:P	cm:i:263	s1:i:2639			rl:i:0
scaffold_684	2968	41	87	+	scaffold_6	2822236	2360457	2420727	46	46	0	tp:A:P	cm:i:4	s1:i:46			rl:i:95
scaffold_686	2932	5	2924	+	scaffold_6	2822236	2419336	2425027	2902	2919	2	tp:A:P	cm:i:280	s1:i:2902			rl:i:0
scaffold_721	2524	16	2513	+	scaffold_6	2822236	2424367	2448243	2497	2497	0	tp:A:S	cm:i:245	s1:i:2497
scaffold_685	2960	8	2957	-	scaffold_6	2822236	2447691	2454022	2949	2949	60	tp:A:P	cm:i:300	s1:i:2949			rl:i:0
scaffold_712	2592	16	2584	-	scaffold_6	2822236	2454286	2468962	2568	2568	60	tp:A:P	cm:i:262	s1:i:2568			rl:i:0
scaffold_730	2359	4	2352	+	scaffold_6	2822236	2468586	2584101	2348	2348	60	tp:A:P	cm:i:237	s1:i:2348			rl:i:0
scaffold_73	112177	3	112170	+	scaffold_6	2822236	2584138	2586777	112047	112170	60	tp:A:P	cm:i:11187	s1:i:112034			rl:i:0
scaffold_736	2297	18	2294	-	scaffold_6	2822236	2587894	2589371	2276	2276	60	tp:A:P	cm:i:238	s1:i:2276			rl:i:0
scaffold_706	2606	7	2605	-	scaffold_6	2822236	2589061	2610139	2598	2598	60	tp:A:P	cm:i:259	s1:i:2598			rl:i:0
scaffold_721	2524	16	2513	+	scaffold_6	2822236	2624294	2632224	2497	2497	0	tp:A:P	cm:i:245	s1:i:2497			rl:i:0
scaffold_714	2581	8	2567	-	scaffold_6	2822236	2632372	2645248	2536	2561	60	tp:A:P	cm:i:262	s1:i:2536			rl:i:0
scaffold_699	2673	2	2667	-	scaffold_6	2822236	2645119	2679654	2636	2665	1	tp:A:P	cm:i:257	s1:i:2636			rl:i:0
scaffold_711	2600	12	2599	+	scaffold_6	2822236	2686339	2702433	2426	2587	60	tp:A:P	cm:i:238	s1:i:2426			rl:i:0
scaffold_731	2353	2	2349	+	scaffold_6	2822236	2703378	2705946	2283	2347	60	tp:A:P	cm:i:223	s1:i:2283			rl:i:0
scaffold_696	2756	5	2745	-	scaffold_6	2822236	2705871	2747733	2740	2740	60	tp:A:P	cm:i:264	s1:i:2740			rl:i:0
scaffold_71	115522	5	115512	+	scaffold_6	2822236	2747399	2764193	115476	115515	60	tp:A:P	cm:i:11624	s1:i:115474			rl:i:0
scaffold_687	2906	2	2902	+	scaffold_6	2822236	2763729	2820260	2872	2900	60	tp:A:P	cm:i:271	s1:i:2872			rl:i:0
scaffold_760	2024	4	2019	+	scaffold_7	2745734	1921	6270	1589	2015	0	tp:A:S	cm:i:153	s1:i:1589
scaffold_798	1722	2	1718	-	scaffold_7	2745734	9799	114123	1673	1716	60	tp:A:P	cm:i:169	s1:i:1673			rl:i:0
scaffold_769	1939	8	1935	-	scaffold_7	2745734	113716	126486	1892	1928	0	tp:A:P	cm:i:170	s1:i:1892			rl:i:0
scaffold_767	1849	7	1845	-	scaffold_7	2745734	127923	131799	1785	1838	3	tp:A:P	cm:i:177	s1:i:1785			rl:i:0
scaffold_774	1888	6	1880	-	scaffold_7	2745734	130542	139153	1874	1874	60	tp:A:P	cm:i:189	s1:i:1874			rl:i:0
scaffold_8	364611	1	364611	-	scaffold_7	2745734	144587	146056	364547	364617	60	tp:A:P	cm:i:36518	s1:i:364547			rl:i:0
scaffold_793	1752	4	1747	+	scaffold_7	2745734	146080	148374	1730	1744	3	tp:A:P	cm:i:164	s1:i:1730			rl:i:0
scaffold_766	1955	3	1944	+	scaffold_7	2745734	150741	166455	1907	1941	60	tp:A:P	cm:i:191	s1:i:1907			rl:i:0
scaffold_797	1722	3	1721	-	scaffold_7	2745734	166377	167913	1673	1718	60	tp:A:P	cm:i:162	s1:i:1673			rl:i:0
scaffold_765	1959	2	1941	-	scaffold_7	2745734	168528	187827	1939	1939	60	tp:A:P	cm:i:201	s1:i:1939			rl:i:0
scaffold_762	1998	7	1980	-	scaffold_7	2745734	187710	214350	1973	1973	60	tp:A:P	cm:i:194	s1:i:1973			rl:i:0
scaffold_763	1994	10	1993	-	scaffold_7	2745734	214511	234309	1983	1983	60	tp:A:P	cm:i:182	s1:i:1983			rl:i:0
scaffold_79	107395	8	107377	-	scaffold_7	2745734	241041	244358	107337	107371	60	tp:A:P	cm:i:10805	s1:i:107337			rl:i:0
scaffold_790	1785	1	1771	-	scaffold_7	2745734	250626	253921	1770	1770	60	tp:A:P	cm:i:174	s1:i:1770			rl:i:0
scaffold_764	1971	5	1965	-	scaffold_7	2745734	260576	262617	1960	1960	60	tp:A:P	cm:i:193	s1:i:1960			rl:i:0
scaffold_801	1707	6	1684	-	scaffold_7	2745734	262546	263693	1678	1678	60	tp:A:P	cm:i:172	s1:i:1678			rl:i:31
scaffold_80	105854	5	105844	+	scaffold_7	2745734	268471	269919	105803	105840	60	tp:A:P	cm:i:10487	s1:i:105803			rl:i:0
scaffold_800	1717	18	1717	+	scaffold_7	2745734	273337	274528	1699	1699	60	tp:A:P	cm:i:167	s1:i:1699			rl:i:0
scaffold_794	1740	8	1732	-	scaffold_7	2745734	274846	276860	1724	1724	60	tp:A:P	cm:i:170	s1:i:1724			rl:i:0
scaffold_77	110202	9	110199	-	scaffold_7	2745734	276971	289145	110137	110190	60	tp:A:P	cm:i:10991	s1:i:110137			rl:i:0
scaffold_78	110585	3879	110585	-	scaffold_7	2745734	289077	295768	106674	106706	60	tp:A:P	cm:i:10668	s1:i:106674			rl:i:19
scaffold_748	2175	2	2175	-	scaffold_7	2745734	295612	356048	2153	2173	60	tp:A:P	cm:i:215	s1:i:2153			rl:i:0
scaffold_751	2159	16	2150	-	scaffold_7	2745734	354521	381028	2103	2134	0	tp:A:S	cm:i:208	s1:i:2103
scaffold_779	1854	17	1853	-	scaffold_7	2745734	381747	389305	1836	1836	60	tp:A:P	cm:i:188	s1:i:1836			rl:i:0
scaffold_751	2159	16	2150	+	scaffold_7	2745734	388337	417924	2118	2134	0	tp:A:S	cm:i:208	s1:i:2118
scaffold_782	1834	3	1833	+	scaffold_7	2745734	417114	422720	1830	1830	60	tp:A:P	cm:i:173	s1:i:1830			rl:i:0
scaffold_746	2190	4	2177	+	scaffold_7	2745734	429121	496498	2157	2173	60	tp:A:P	cm:i:204	s1:i:2157			rl:i:0
scaffold_75	110422	8	110410	-	scaffold_7	2745734	496272	550515	110363	110408	60	tp:A:P	cm:i:11020	s1:i:110360			rl:i:38
scaffold_752	2112	18	2098	+	scaffold_7	2745734	550547	601274	2049	2080	0	tp:A:S	cm:i:206	s1:i:2049
scaffold_788	1792	14	1779	+	scaffold_7	2745734	601255	605156	1765	1765	60	tp:A:P	cm:i:182	s1:i:1765			rl:i:0
scaffold_769	1939	8	1935	+	scaffold_7	2745734	605920	618417	1891	1927	0	tp:A:S	cm:i:169	s1:i:1891
scaffold_747	2176	3	573	+	scaffold_7	2745734	618561	679351	570	570	60	tp:A:P	cm:i:51	s1:i:570			rl:i:0
scaffold_760	2024	4	2019	-	scaffold_7	2745734	679067	712295	1834	2015	40	tp:A:P	cm:i:172	s1:i:1834			rl:i:0
scaffold_804	1695	5	1691	-	scaffold_7	2745734	709709	741375	1686	1686	0	tp:A:P	cm:i:165	s1:i:1686			rl:i:0
scaffold_795	1684	18	1673	-	scaffold_7	2745734	741291	743172	1473	1657	60	tp:A:P	cm:i:146	s1:i:1473			rl:i:0
scaffold_803	1636	2	1634	-	scaffold_7	2745734	743087	811968	1606	1632	60	tp:A:P	cm:i:154	s1:i:1606			rl:i:0
scaffold_799	1718	0	1715	-	scaffold_7	2745734	743094	744622	1715	1715	0	tp:A:P	cm:i:168	s1:i:1715			rl:i:0
scaffold_751	2159	16	2150	-	scaffold_7	2745734	812099	865692	2130	2134	1	tp:A:P	cm:i:209	s1:i:2130			rl:i:0
scaffold_778	1742	0	1740	+	scaffold_7	2745734	865752	872969	1718	1740	60	tp:A:P	cm:i:169	s1:i:1718			rl:i:0
scaffold_777	1809	6	1804	+	scaffold_7	2745734	872546	1005248	1761	1798	0	tp:A:S	cm:i:175	s1:i:1761
scaffold_759	1993	10	1987	-	scaffold_7	2745734	1005545	1011308	1899	1977	60	tp:A:P	cm:i:179	s1:i:1899			rl:i:0
scaffold_758	2066	7	2064	+	scaffold_7	2745734	1011405	1191376	2054	2057	0	tp:A:S	cm:i:208	s1:i:2054
scaffold_750	2166	14	2163	-	scaffold_7	2745734	1191643	1245263	2149	2149	60	tp:A:P	cm:i:220	s1:i:2149			rl:i:0
scaffold_786	1808	12	1804	+	scaffold_7	2745734	1245596	1372423	1792	1792	3	tp:A:P	cm:i:174	s1:i:1792			rl:i:0
scaffold_773	1891	15	1883	+	scaffold_7	2745734	1373292	1537826	1849	1868	5	tp:A:P	cm:i:186	s1:i:1849			rl:i:0
scaffold_781	1843	1	1834	-	scaffold_7	2745734	1537591	1543226	1833	1833	60	tp:A:P	cm:i:171	s1:i:1833			rl:i:0
scaffold_756	2068	11	2052	-	scaffold_7	2745734	1543263	1583887	2016	2041	60	tp:A:P	cm:i:200	s1:i:2016			rl:i:0
scaffold_761	1946	9	1944	+	scaffold_7	2745734	1583433	1627940	1872	1935	60	tp:A:P	cm:i:190	s1:i:1872			rl:i:19
scaffold_777	1809	6	1804	+	scaffold_7	2745734	1627605	1634964	1798	1798	6	tp:A:P	cm:i:180	s1:i:1798			rl:i:0
scaffold_755	2084	13	2081	-	scaffold_7	2745734	1634830	1779374	2068	2068	60	tp:A:P	cm:i:208	s1:i:2068			rl:i:0
scaffold_752	2112	18	2098	-	scaffold_7	2745734	1779430	1832017	2063	2080	2	tp:A:P	cm:i:208	s1:i:2063			rl:i:0
scaffold_802	1705	14	1689	-	scaffold_7	2745734	1831971	1929026	1649	1675	60	tp:A:P	cm:i:157	s1:i:1649			rl:i:0
scaffold_770	1909	3	1891	+	scaffold_7	2745734	1930354	2076880	1888	1888	60	tp:A:P	cm:i:181	s1:i:1888			rl:i:0
scaffold_785	1767	14	1759	+	scaffold_7	2745734	2091278	2096430	1733	1745	60	tp:A:P	cm:i:179	s1:i:1733			rl:i:0
scaffold_754	2106	18	2094	+	scaffold_7	2745734	2096253	2138267	2072	2076	0	tp:A:S	cm:i:207	s1:i:2072
scaffold_767	1849	7	1845	-	scaffold_7	2745734	2137999	2156247	1762	1838	0	tp:A:S	cm:i:174	s1:i:1762
scaffold_789	1791	0	1782	+	scaffold_7	2745734	2162040	2165293	1772	1782	0	tp:A:S	cm:i:178	s1:i:1772
scaffold_783	1831	0	1828	+	scaffold_7	2745734	2165217	2170691	1828	1828	60	tp:A:P	cm:i:192	s1:i:1828			rl:i:0
scaffold_784	1816	8	1801	+	scaffold_7	2745734	2170717	2176190	1762	1793	60	tp:A:P	cm:i:165	s1:i:1762			rl:i:0
scaffold_799	1718	0	1715	-	scaffold_7	2745734	2177081	2178546	1715	1715	0	tp:A:S	cm:i:168	s1:i:1715
scaffold_775	1888	16	1875	-	scaffold_7	2745734	2204410	2208850	1859	1859	60	tp:A:P	cm:i:189	s1:i:1859			rl:i:0
scaffold_776	1873	11	1860	+	scaffold_7	2745734	2208435	2211920	1849	1849	60	tp:A:P	cm:i:188	s1:i:1849			rl:i:0
scaffold_804	1695	5	1691	-	scaffold_7	2745734	2211988	2212973	1682	1686	0	tp:A:S	cm:i:164	s1:i:1682
scaffold_772	1892	1	1882	+	scaffold_7	2745734	2213538	2223916	1881	1881	60	tp:A:P	cm:i:186	s1:i:1881			rl:i:0
scaffold_789	1791	0	1782	+	scaffold_7	2745734	2225845	2229505	1782	1782	1	tp:A:P	cm:i:180	s1:i:1782			rl:i:0
scaffold_753	2080	4	2079	-	scaffold_7	2745734	2229883	2277517	2075	2075	60	tp:A:P	cm:i:207	s1:i:2075			rl:i:0
scaffold_749	2167	16	2158	-	scaffold_7	2745734	2277085	2336709	2140	2142	60	tp:A:P	cm:i:214	s1:i:2140			rl:i:19
scaffold_754	2106	18	2094	+	scaffold_7	2745734	2336592	2379469	2076	2076	0	tp:A:P	cm:i:210	s1:i:2076			rl:i:0
scaffold_747	2176	583	2162	+	scaffold_7	2745734	2379171	2445069	1579	1579	60	tp:A:P	cm:i:149	s1:i:1579			rl:i:0
scaffold_786	1808	12	1804	-	scaffold_7	2745734	2445243	2449513	1772	1792	0	tp:A:S	cm:i:171	s1:i:1772
scaffold_76	110327	2	110314	-	scaffold_7	2745734	2470399	2505157	110148	110319	60	tp:A:P	cm:i:10963	s1:i:110148			rl:i:0
scaffold_780	1852	0	1849	+	scaffold_7	2745734	2504674	2510174	1849	1849	60	tp:A:P	cm:i:182	s1:i:1849			rl:i:0
scaffold_787	1807	6	1806	-	scaffold_7	2745734	2510527	2514794	1774	1800	60	tp:A:P	cm:i:174	s1:i:1774			rl:i:0
scaffold_792	1757	10	1743	+	scaffold_7	2745734	2516130	2518961	1712	1733	60	tp:A:P	cm:i:164	s1:i:1712			rl:i:0
scaffold_796	1730	18	1725	-	scaffold_7	2745734	2518973	2520505	1707	1707	60	tp:A:P	cm:i:171	s1:i:1707			rl:i:0
scaffold_758	2066	7	2064	+	scaffold_7	2745734	2520511	2525131	2057	2057	0	tp:A:P	cm:i:210	s1:i:2057			rl:i:0
scaffold_757	2019	0	2009	-	scaffold_7	2745734	2529323	2563294	2009	2009	60	tp:A:P	cm:i:188	s1:i:2009			rl:i:0
scaffold_791	1724	8	1719	-	scaffold_7	2745734	2563364	2566325	1552	1711	60	tp:A:P	cm:i:153	s1:i:1552			rl:i:0
scaffold_771	1859	4	1846	+	scaffold_7	2745734	2570022	2580975	1836	1842	60	tp:A:P	cm:i:180	s1:i:1836			rl:i:0
scaffold_793	1752	4	1747	+	scaffold_7	2745734	2581240	2583416	1710	1743	0	tp:A:S	cm:i:162	s1:i:1710
scaffold_768	1939	17	1930	-	scaffold_7	2745734	2583847	2597437	1913	1913	60	tp:A:P	cm:i:197	s1:i:1913			rl:i:0
scaffold_773	1891	15	1883	-	scaffold_7	2745734	2597502	2731364	1814	1868	0	tp:A:S	cm:i:182	s1:i:1814
scaffold_78	110585	10	3757	+	scaffold_7	2745734	2731870	2737755	3645	3747	60	tp:A:P	cm:i:372	s1:i:3643			rl:i:19
scaffold_829	1517	4	1506	-	scaffold_8	2567019	4200	6018	1502	1502	0	tp:A:P	cm:i:148	s1:i:1502			rl:i:0
scaffold_829	1517	4	1506	+	scaffold_8	2567019	5934	22916	1481	1502	0	tp:A:S	cm:i:143	s1:i:1481
scaffold_812	1561	15	1548	-	scaffold_8	2567019	23472	77302	1397	1534	60	tp:A:P	cm:i:145	s1:i:1397			rl:i:0
scaffold_808	1640	4	1631	+	scaffold_8	2567019	76812	84860	1610	1627	60	tp:A:P	cm:i:156	s1:i:1610			rl:i:0
scaffold_807	1643	16	1643	+	scaffold_8	2567019	84433	144932	1627	1627	60	tp:A:P	cm:i:155	s1:i:1627			rl:i:0
scaffold_837	1475	11	1464	+	scaffold_8	2567019	151020	162244	1447	1453	60	tp:A:P	cm:i:149	s1:i:1447			rl:i:19
scaffold_871	1301	10	1298	-	scaffold_8	2567019	162998	164035	1281	1288	60	tp:A:P	cm:i:130	s1:i:1281			rl:i:19
scaffold_843	1408	3	1396	+	scaffold_8	2567019	177689	181682	1369	1393	60	tp:A:P	cm:i:137	s1:i:1369			rl:i:0
scaffold_865	1334	4	1325	-	scaffold_8	2567019	198029	199213	1315	1321	0	tp:A:P	cm:i:131	s1:i:1315			rl:i:0
scaffold_856	1417	18	1410	+	scaffold_8	2567019	201702	203499	1392	1392	60	tp:A:P	cm:i:134	s1:i:1392			rl:i:0
scaffold_862	1377	7	1361	+	scaffold_8	2567019	204047	205402	1353	1355	0	tp:A:P	cm:i:135	s1:i:1353			rl:i:0
scaffold_853	1426	4	1426	+	scaffold_8	2567019	207089	209437	1401	1422	2	tp:A:P	cm:i:142	s1:i:1401			rl:i:0
scaffold_841	1460	9	1455	-	scaffold_8	2567019	214261	220448	1446	1446	60	tp:A:P	cm:i:148	s1:i:1446			rl:i:0
scaffold_855	1417	0	1404	+	scaffold_8	2567019	243493	245342	1404	1404	60	tp:A:P	cm:i:149	s1:i:1404			rl:i:0
scaffold_835	1492	4	1477	-	scaffold_8	2567019	252662	264955	1473	1473	60	tp:A:P	cm:i:152	s1:i:1473			rl:i:0
scaffold_87	101900	16	101882	+	scaffold_8	2567019	269824	270965	101784	101877	60	tp:A:P	cm:i:10137	s1:i:101782			rl:i:0
scaffold_844	1448	2	1435	+	scaffold_8	2567019	272376	276364	1433	1433	60	tp:A:P	cm:i:138	s1:i:1433			rl:i:0
scaffold_865	1334	4	1325	+	scaffold_8	2567019	277231	379106	1314	1321	0	tp:A:S	cm:i:130	s1:i:1314
scaffold_865	1334	4	1325	-	scaffold_8	2567019	386914	388126	1288	1323	0	tp:A:S	cm:i:128	s1:i:1288
scaffold_816	1564	14	1558	-	scaffold_8	2567019	388365	433536	1544	1544	60	tp:A:P	cm:i:155	s1:i:1544			rl:i:0
scaffold_828	1521	2	1521	+	scaffold_8	2567019	443236	462899	1519	1519	0	tp:A:P	cm:i:145	s1:i:1519			rl:i:0
scaffold_82	104353	16	104335	+	scaffold_8	2567019	463519	499802	104222	104324	60	tp:A:P	cm:i:10400	s1:i:104222			rl:i:0
scaffold_859	1394	14	1390	+	scaffold_8	2567019	499815	501359	1376	1376	0	tp:A:S	cm:i:151	s1:i:1376
scaffold_805	1662	9	1649	-	scaffold_8	2567019	501374	585068	1640	1640	60	tp:A:P	cm:i:163	s1:i:1640			rl:i:0
scaffold_830	1485	12	1477	+	scaffold_8	2567019	585680	737438	1465	1465	60	tp:A:P	cm:i:146	s1:i:1465			rl:i:0
scaffold_852	1429	8	1419	-	scaffold_8	2567019	745672	748130	1411	1411	60	tp:A:P	cm:i:136	s1:i:1411			rl:i:0
scaffold_817	1537	3	1535	+	scaffold_8	2567019	750416	962860	1532	1532	7	tp:A:P	cm:i:153	s1:i:1532			rl:i:0
scaffold_847	1442	2	1428	+	scaffold_8	2567019	965088	968404	1426	1426	60	tp:A:P	cm:i:140	s1:i:1426			rl:i:0
scaffold_83	103833	8	103826	-	scaffold_8	2567019	968965	985907	103773	103823	60	tp:A:P	cm:i:10430	s1:i:103773			rl:i:19
scaffold_825	1533	0	1527	+	scaffold_8	2567019	985982	1153783	1500	1527	0	tp:A:S	cm:i:160	s1:i:1500
scaffold_809	1639	1	1632	-	scaffold_8	2567019	1183389	1251066	1604	1631	60	tp:A:P	cm:i:154	s1:i:1604			rl:i:0
scaffold_864	1361	18	1353	-	scaffold_8	2567019	1250734	1252049	1335	1335	60	tp:A:P	cm:i:130	s1:i:1335			rl:i:0
scaffold_859	1394	14	1390	-	scaffold_8	2567019	1252062	1253647	1376	1376	0	tp:A:P	cm:i:151	s1:i:1376			rl:i:0
scaffold_848	1394	11	1386	+	scaffold_8	2567019	1253666	1256836	1375	1375	60	tp:A:P	cm:i:132	s1:i:1375			rl:i:0
scaffold_858	1395	4	1386	-	scaffold_8	2567019	1256911	1362053	1382	1382	60	tp:A:P	cm:i:139	s1:i:1382			rl:i:0
scaffold_846	1442	5	1438	+	scaffold_8	2567019	1362261	1365812	1433	1433	60	tp:A:P	cm:i:146	s1:i:1433			rl:i:0
scaffold_860	1350	4	1339	-	scaffold_8	2567019	1367632	1369134	1335	1335	60	tp:A:P	cm:i:141	s1:i:1335			rl:i:0
scaffold_867	1211	15	1199	+	scaffold_8	2567019	1369144	1370350	1172	1184	60	tp:A:P	cm:i:113	s1:i:1172			rl:i:0
scaffold_863	1316	16	1312	+	scaffold_8	2567019	1370789	1372108	1173	1297	60	tp:A:P	cm:i:122	s1:i:1173			rl:i:0
scaffold_849	1436	10	1423	-	scaffold_8	2567019	1373161	1376240	1413	1413	60	tp:A:P	cm:i:145	s1:i:1413			rl:i:0
scaffold_868	1306	2	1291	+	scaffold_8	2567019	1381011	1382194	1274	1289	0	tp:A:S	cm:i:128	s1:i:1274
scaffold_873	1296	3	1289	-	scaffold_8	2567019	1382226	1383207	1286	1286	60	tp:A:P	cm:i:130	s1:i:1286			rl:i:0
scaffold_857	1373	4	1359	+	scaffold_8	2567019	1383451	1490822	1355	1355	60	tp:A:P	cm:i:125	s1:i:1355			rl:i:0
scaffold_811	1587	16	1587	-	scaffold_8	2567019	1492491	1550396	1571	1571	60	tp:A:P	cm:i:158	s1:i:1571			rl:i:0
scaffold_872	1301	9	1263	+	scaffold_8	2567019	1550643	1551625	1245	1254	60	tp:A:P	cm:i:128	s1:i:1245			rl:i:0
scaffold_869	1255	8	1243	-	scaffold_8	2567019	1551657	1552837	1235	1235	60	tp:A:P	cm:i:125	s1:i:1235			rl:i:0
scaffold_85	102379	2	102375	-	scaffold_8	2567019	1557609	1560687	102337	102374	60	tp:A:P	cm:i:10266	s1:i:102335			rl:i:0
scaffold_862	1377	7	1361	-	scaffold_8	2567019	1561734	1563054	1349	1354	0	tp:A:S	cm:i:134	s1:i:1349
scaffold_868	1306	2	1291	+	scaffold_8	2567019	1563492	1564697	1289	1289	3	tp:A:P	cm:i:130	s1:i:1289			rl:i:0
scaffold_861	1393	7	1389	-	scaffold_8	2567019	1564707	1566208	1376	1382	13	tp:A:P	cm:i:130	s1:i:1376			rl:i:0
scaffold_845	1445	5	1441	-	scaffold_8	2567019	1568031	1571583	1436	1436	60	tp:A:P	cm:i:133	s1:i:1436			rl:i:0
scaffold_813	1575	5	1575	-	scaffold_8	2567019	1571791	1625619	1570	1570	60	tp:A:P	cm:i:161	s1:i:1570			rl:i:0
scaffold_834	1493	13	1475	+	scaffold_8	2567019	1625870	1748371	1462	1462	1	tp:A:P	cm:i:141	s1:i:1462			rl:i:0
scaffold_870	1304	13	1296	+	scaffold_8	2567019	1749015	1750142	1283	1283	60	tp:A:P	cm:i:124	s1:i:1283			rl:i:0
scaffold_838	1471	9	1457	+	scaffold_8	2567019	1750229	1760020	1428	1448	0	tp:A:S	cm:i:137	s1:i:1428
scaffold_850	1431	3	1431	-	scaffold_8	2567019	1760130	1762971	1428	1428	60	tp:A:P	cm:i:148	s1:i:1428			rl:i:0
scaffold_834	1493	13	1475	+	scaffold_8	2567019	1762908	1773256	1456	1462	0	tp:A:S	cm:i:138	s1:i:1456
scaffold_840	1433	7	1433	+	scaffold_8	2567019	1773237	1780096	1426	1426	60	tp:A:P	cm:i:146	s1:i:1426			rl:i:0
scaffold_810	1634	16	1616	-	scaffold_8	2567019	1782149	1843733	1592	1600	60	tp:A:P	cm:i:161	s1:i:1592			rl:i:0
scaffold_866	1332	12	1327	-	scaffold_8	2567019	1843428	1942126	1315	1315	0	tp:A:P	cm:i:123	s1:i:1315			rl:i:0
scaffold_826	1442	12	1424	-	scaffold_8	2567019	1941912	1963709	1412	1412	60	tp:A:P	cm:i:141	s1:i:1412			rl:i:0
scaffold_827	1527	6	1516	+	scaffold_8	2567019	1963496	1984194	1510	1510	60	tp:A:P	cm:i:156	s1:i:1510			rl:i:0
scaffold_822	1541	17	1526	+	scaffold_8	2567019	1984131	2011165	1509	1509	60	tp:A:P	cm:i:146	s1:i:1509			rl:i:0
scaffold_86	102163	1	102160	+	scaffold_8	2567019	2015348	2016867	102070	102163	60	tp:A:P	cm:i:10259	s1:i:102070			rl:i:57
scaffold_825	1533	0	1527	+	scaffold_8	2567019	2023081	2048608	1527	1527	5	tp:A:P	cm:i:163	s1:i:1527			rl:i:0
scaffold_824	1536	13	1533	-	scaffold_8	2567019	2050561	2076458	1520	1520	60	tp:A:P	cm:i:164	s1:i:1520			rl:i:0
scaffold_806	1606	7	1588	+	scaffold_8	2567019	2076602	2079425	1581	1581	60	tp:A:P	cm:i:153	s1:i:1581			rl:i:0
scaffold_823	1540	16	1537	-	scaffold_8	2567019	2079447	2106141	1521	1521	60	tp:A:P	cm:i:153	s1:i:1521			rl:i:0
scaffold_81	105169	16	105158	+	scaffold_8	2567019	2106209	2130682	105142	105142	60	tp:A:P	cm:i:10477	s1:i:105142			rl:i:0
scaffold_833	1495	13	1490	-	scaffold_8	2567019	2130772	2143591	1477	1477	60	tp:A:P	cm:i:148	s1:i:1477			rl:i:0
scaffold_839	1467	2	1460	+	scaffold_8	2567019	2144092	2152895	1437	1458	5	tp:A:P	cm:i:136	s1:i:1437			rl:i:0
scaffold_818	1557	12	1548	+	scaffold_8	2567019	2152849	2189365	1536	1536	60	tp:A:P	cm:i:146	s1:i:1536			rl:i:0
scaffold_821	1542	1	1529	+	scaffold_8	2567019	2190356	2218548	1528	1528	60	tp:A:P	cm:i:148	s1:i:1528			rl:i:0
scaffold_820	1544	4	1534	-	scaffold_8	2567019	2218322	2250411	1504	1537	60	tp:A:P	cm:i:141	s1:i:1502			rl:i:57
scaffold_84	103173	5	38407	-	scaffold_8	2567019	2251053	2258840	38402	38402	60	tp:A:P	cm:i:3829	s1:i:38402			rl:i:0
scaffold_829	1517	4	1506	+	scaffold_8	2567019	2258468	2276405	1502	1502	0	tp:A:S	cm:i:148	s1:i:1502
scaffold_838	1471	9	1457	-	scaffold_8	2567019	2277348	2288085	1448	1448	4	tp:A:P	cm:i:141	s1:i:1448			rl:i:0
scaffold_831	1491	10	1478	+	scaffold_8	2567019	2288689	2304576	1468	1468	60	tp:A:P	cm:i:146	s1:i:1468			rl:i:0
scaffold_866	1332	12	1327	+	scaffold_8	2567019	2304938	2306142	1315	1315	0	tp:A:S	cm:i:123	s1:i:1315
scaffold_819	1505	0	1490	+	scaffold_8	2567019	2308039	2344291	1486	1490	60	tp:A:P	cm:i:145	s1:i:1486			rl:i:0
scaffold_842	1459	11	1454	+	scaffold_8	2567019	2345834	2349824	1406	1445	0	tp:A:S	cm:i:136	s1:i:1406
scaffold_853	1426	4	1426	+	scaffold_8	2567019	2351848	2354124	1391	1422	0	tp:A:S	cm:i:141	s1:i:1391
scaffold_832	1445	7	1432	+	scaffold_8	2567019	2355084	2370482	1425	1425	60	tp:A:P	cm:i:146	s1:i:1425			rl:i:0
scaffold_854	1305	15	1299	+	scaffold_8	2567019	2376997	2378833	1284	1284	60	tp:A:P	cm:i:125	s1:i:1284			rl:i:0
scaffold_814	1595	0	1585	+	scaffold_8	2567019	2380073	2380199	1585	1585	2	tp:A:P	cm:i:148	s1:i:1585			rl:i:0
scaffold_828	1521	2	1521	-	scaffold_8	2567019	2380124	2399364	1519	1519	0	tp:A:S	cm:i:145	s1:i:1519
scaffold_861	1393	7	1389	+	scaffold_8	2567019	2400682	2402115	1312	1382	0	tp:A:S	cm:i:118	s1:i:1312
scaffold_84	103173	38229	103164	-	scaffold_8	2567019	2401842	2406987	64896	64942	60	tp:A:P	cm:i:6583	s1:i:64895			rl:i:0
scaffold_851	1431	14	1418	+	scaffold_8	2567019	2432674	2435237	1404	1404	60	tp:A:P	cm:i:148	s1:i:1404			rl:i:0
scaffold_842	1459	11	1454	-	scaffold_8	2567019	2435460	2441504	1409	1444	0	tp:A:P	cm:i:136	s1:i:1409			rl:i:0
scaffold_836	1486	12	1481	-	scaffold_8	2567019	2441605	2453666	1469	1469	60	tp:A:P	cm:i:145	s1:i:1469			rl:i:0
scaffold_839	1467	2	1460	+	scaffold_8	2567019	2453506	2460042	1411	1463	0	tp:A:S	cm:i:130	s1:i:1411
scaffold_814	1595	0	1585	-	scaffold_8	2567019	2461515	2505893	1570	1585	0	tp:A:S	cm:i:145	s1:i:1570
scaffold_815	1477	15	1469	-	scaffold_8	2567019	2504955	2510524	1294	1454	60	tp:A:P	cm:i:127	s1:i:1294			rl:i:38
scaffold_817	1537	3	1535	+	scaffold_8	2567019	2510471	2551451	1494	1532	0	tp:A:S	cm:i:149	s1:i:1494
scaffold_895	1197	0	1183	-	scaffold_9	2382659	42121	51639	1166	1183	0	tp:A:S	cm:i:118	s1:i:1166
scaffold_883	1229	3	1213	+	scaffold_9	2382659	51549	83935	1210	1210	60	tp:A:P	cm:i:123	s1:i:1210			rl:i:0
scaffold_881	1239	10	1239	+	scaffold_9	2382659	83985	132388	1229	1229	0	tp:A:P	cm:i:125	s1:i:1229			rl:i:0
scaffold_874	1291	0	1275	+	scaffold_9	2382659	132802	163782	1275	1275	60	tp:A:P	cm:i:124	s1:i:1275			rl:i:0
scaffold_884	1167	15	1156	+	scaffold_9	2382659	163944	166413	1141	1141	60	tp:A:P	cm:i:114	s1:i:1141			rl:i:0
scaffold_879	1243	17	1229	+	scaffold_9	2382659	166543	222772	1212	1212	60	tp:A:P	cm:i:108	s1:i:1212			rl:i:0
scaffold_919	1065	11	1057	+	scaffold_9	2382659	224149	342790	989	1046	60	tp:A:P	cm:i:96	s1:i:989			rl:i:0
scaffold_943	1003	7	993	-	scaffold_9	2382659	358986	359123	972	986	60	tp:A:P	cm:i:99	s1:i:972	s2:i:151	dv:f:0.0011	rl:i:0
scaffold_909	1149	10	1148	-	scaffold_9	2382659	367886	371792	969	1138	60	tp:A:P	cm:i:95	s1:i:969			rl:i:0
scaffold_942	1007	11	1004	-	scaffold_9	2382659	375649	375788	993	993	0	tp:A:S	cm:i:101	s1:i:993
scaffold_932	1063	18	1056	-	scaffold_9	2382659	377252	379309	1038	1038	60	tp:A:P	cm:i:105	s1:i:1038			rl:i:0
scaffold_931	1067	17	1054	+	scaffold_9	2382659	383754	385829	1037	1037	60	tp:A:P	cm:i:99	s1:i:1037			rl:i:0
scaffold_940	1017	4	1005	+	scaffold_9	2382659	385842	387367	959	1001	0	tp:A:S	cm:i:101	s1:i:959
scaffold_96	91112	15	91097	-	scaffold_9	2382659	387439	388463	90801	91085	60	tp:A:P	cm:i:9075	s1:i:90801	s2:i:375	dv:f:0.0002	rl:i:0
scaffold_878	1208	1	1206	+	scaffold_9	2382659	397768	462143	1123	1205	0	tp:A:P	cm:i:110	s1:i:1123			rl:i:0
scaffold_921	1115	6	1110	-	scaffold_9	2382659	462282	464843	1094	1104	0	tp:A:S	cm:i:108	s1:i:1094
scaffold_882	1238	14	1220	+	scaffold_9	2382659	467238	500439	1206	1206	60	tp:A:P	cm:i:135	s1:i:1206			rl:i:0
scaffold_877	1246	7	1234	+	scaffold_9	2382659	500341	567037	1207	1227	60	tp:A:P	cm:i:122	s1:i:1207			rl:i:0
scaffold_889	1213	10	1206	+	scaffold_9	2382659	567301	582041	1180	1196	60	tp:A:P	cm:i:118	s1:i:1180			rl:i:0
scaffold_895	1197	0	1183	-	scaffold_9	2382659	583246	592783	1175	1183	0	tp:A:S	cm:i:121	s1:i:1175
scaffold_897	1160	7	1148	-	scaffold_9	2382659	592632	601032	1110	1141	60	tp:A:P	cm:i:110	s1:i:1110			rl:i:0
scaffold_898	1149	8	1139	+	scaffold_9	2382659	608054	612622	1131	1131	1	tp:A:P	cm:i:118	s1:i:1131			rl:i:0
scaffold_898	1149	8	1139	+	scaffold_9	2382659	612564	615525	1123	1131	0	tp:A:S	cm:i:116	s1:i:1123
scaffold_99	88353	9	88352	-	scaffold_9	2382659	615552	703894	88300	88343	60	tp:A:P	cm:i:8882	s1:i:88300	s2:i:350	dv:f:0.0001	rl:i:0
scaffold_935	1008	0	1008	-	scaffold_9	2382659	703814	705774	1008	1008	60	tp:A:P	cm:i:91	s1:i:1008			rl:i:19
scaffold_93	95057	10	95052	+	scaffold_9	2382659	707343	709418	94804	95047	60	tp:A:P	cm:i:9501	s1:i:94799			rl:i:0
scaffold_875	1252	0	1247	+	scaffold_9	2382659	709329	781805	1130	1247	60	tp:A:P	cm:i:110	s1:i:1130			rl:i:0
scaffold_880	1241	0	1225	-	scaffold_9	2382659	796045	870011	1225	1225	60	tp:A:P	cm:i:119	s1:i:1225			rl:i:0
scaffold_888	1213	5	1211	-	scaffold_9	2382659	870120	886681	1199	1206	0	tp:A:S	cm:i:109	s1:i:1199
scaffold_888	1213	5	1211	-	scaffold_9	2382659	886264	903506	1206	1206	0	tp:A:S	cm:i:111	s1:i:1206
scaffold_885	1176	17	1171	-	scaffold_9	2382659	903504	928889	1154	1154	60	tp:A:P	cm:i:119	s1:i:1154			rl:i:0
scaffold_97	89672	10	1859	-	scaffold_9	2382659	929007	1021511	1821	1849	60	tp:A:P	cm:i:184	s1:i:1821	s2:i:87	dv:f:0.0011	rl:i:0
scaffold_941	1013	17	999	+	scaffold_9	2382659	1021477	1022832	975	982	0	tp:A:S	cm:i:92	s1:i:975
scaffold_905	1121	10	1116	+	scaffold_9	2382659	1023230	1027240	1106	1106	60	tp:A:P	cm:i:107	s1:i:1106			rl:i:0
scaffold_9	337272	13	337265	+	scaffold_9	2382659	1028667	1035853	337137	337257	60	tp:A:P	cm:i:33698	s1:i:337137			rl:i:0
scaffold_900	1183	2	1181	+	scaffold_9	2382659	1035950	1041990	1179	1179	60	tp:A:P	cm:i:116	s1:i:1179			rl:i:0
scaffold_887	1216	9	1213	+	scaffold_9	2382659	1043655	1063600	1204	1204	60	tp:A:P	cm:i:118	s1:i:1204			rl:i:0
scaffold_876	1286	18	1278	+	scaffold_9	2382659	1065389	1135260	1260	1260	60	tp:A:P	cm:i:129	s1:i:1260			rl:i:0
scaffold_901	1160	12	1152	+	scaffold_9	2382659	1135131	1139381	1140	1140	60	tp:A:P	cm:i:124	s1:i:1140			rl:i:0
scaffold_902	1150	7	1141	-	scaffold_9	2382659	1139541	1143788	1054	1134	60	tp:A:P	cm:i:97	s1:i:1054			rl:i:0
scaffold_903	1175	15	1162	+	scaffold_9	2382659	1145815	1150066	1147	1147	6	tp:A:P	cm:i:112	s1:i:1147			rl:i:0
scaffold_891	1209	2	1191	-	scaffold_9	2382659	1150411	1163826	1189	1189	60	tp:A:P	cm:i:119	s1:i:1189			rl:i:0
scaffold_878	1208	1	1206	+	scaffold_9	2382659	1164143	1227178	1123	1205	0	tp:A:S	cm:i:110	s1:i:1123
scaffold_886	1218	12	1218	-	scaffold_9	2382659	1227072	1390596	1206	1206	60	tp:A:P	cm:i:122	s1:i:1206			rl:i:0
scaffold_908	1150	14	1140	-	scaffold_9	2382659	1391370	1395277	1126	1126	60	tp:A:P	cm:i:110	s1:i:1126			rl:i:0
scaffold_933	1025	13	1024	+	scaffold_9	2382659	1395336	1397391	991	1011	60	tp:A:P	cm:i:96	s1:i:991			rl:i:0
scaffold_930	1046	14	1041	+	scaffold_9	2382659	1401837	1403913	1009	1027	60	tp:A:P	cm:i:101	s1:i:1009			rl:i:0
scaffold_940	1017	4	1005	+	scaffold_9	2382659	1403926	1405453	998	1001	10	tp:A:P	cm:i:106	s1:i:998			rl:i:0
scaffold_95	92512	1	92504	+	scaffold_9	2382659	1405525	1406552	92478	92505	60	tp:A:P	cm:i:9133	s1:i:92478	s2:i:324	dv:f:0.0000	rl:i:0
scaffold_895	1197	0	1183	+	scaffold_9	2382659	1408699	1546909	1183	1183	1	tp:A:P	cm:i:122	s1:i:1183			rl:i:0
scaffold_944	1000	2	998	+	scaffold_9	2382659	1554752	1555815	996	996	60	tp:A:P	cm:i:104	s1:i:996	s2:i:50	dv:f:0.0005	rl:i:0
scaffold_89	100685	4	100682	+	scaffold_9	2382659	1575779	1590315	100300	100706	60	tp:A:P	cm:i:10111	s1:i:100254			rl:i:43
scaffold_896	1195	4	1194	+	scaffold_9	2382659	1592199	1601185	1190	1190	4	tp:A:P	cm:i:119	s1:i:1190			rl:i:0
scaffold_939	1038	14	1035	+	scaffold_9	2382659	1601276	1602954	1021	1021	60	tp:A:P	cm:i:101	s1:i:1021			rl:i:0
scaffold_91	97733	97583	97721	+	scaffold_9	2382659	1604079	1607110	76	138	0	tp:A:P	cm:i:7	s1:i:76			rl:i:0
scaffold_906	1152	3	1137	-	scaffold_9	2382659	1608375	1612380	1134	1134	60	tp:A:P	cm:i:119	s1:i:1134			rl:i:0
scaffold_941	1013	17	999	-	scaffold_9	2382659	1612778	1614130	953	982	0	tp:A:S	cm:i:89	s1:i:953
scaffold_938	1039	2	1029	-	scaffold_9	2382659	1614511	1616293	1027	1027	8	tp:A:P	cm:i:102	s1:i:1027			rl:i:0
scaffold_938	1039	2	1029	-	scaffold_9	2382659	1634202	1635917	997	1027	0	tp:A:S	cm:i:97	s1:i:997
scaffold_97	89672	1266	89662	-	scaffold_9	2382659	1641941	1642942	87960	88405	60	tp:A:P	cm:i:8786	s1:i:87889	s2:i:285	dv:f:0.0003	rl:i:0
scaffold_941	1013	17	999	-	scaffold_9	2382659	1644315	1645735	982	982	1	tp:A:P	cm:i:93	s1:i:982			rl:i:0
scaffold_893	1204	7	1198	+	scaffold_9	2382659	1648821	1659484	1191	1191	0	tp:A:P	cm:i:131	s1:i:1191			rl:i:0
scaffold_934	1024	13	1024	+	scaffold_9	2382659	1661518	1663495	992	1011	60	tp:A:P	cm:i:98	s1:i:992			rl:i:0
scaffold_936	1025	8	1018	+	scaffold_9	2382659	1667707	1669575	990	1010	60	tp:A:P	cm:i:104	s1:i:990			rl:i:0
scaffold_927	1078	11	1065	-	scaffold_9	2382659	1670344	1672672	1054	1054	60	tp:A:P	cm:i:110	s1:i:1054			rl:i:0
scaffold_90	99325	8	99308	-	scaffold_9	2382659	1673282	1675858	99257	99302	60	tp:A:P	cm:i:10005	s1:i:99257			rl:i:62
scaffold_94	95055	27534	95055	+	scaffold_9	2382659	1676261	1677892	66187	68887	60	tp:A:P	cm:i:6573	s1:i:65908			rl:i:0
scaffold_91	97733	7	97558	-	scaffold_9	2382659	1686207	1689829	96316	97840	60	tp:A:P	cm:i:9588	s1:i:96258			rl:i:0
scaffold_94	95055	10	31273	-	scaffold_9	2382659	1698164	1699685	29658	31679	60	tp:A:P	cm:i:2958	s1:i:29570			rl:i:0
scaffold_924	1032	15	1021	-	scaffold_9	2382659	1699786	1702206	1006	1006	60	tp:A:P	cm:i:107	s1:i:1006			rl:i:0
scaffold_88	101940	3248	101940	+	scaffold_9	2382659	1704877	1716088	98662	98698	60	tp:A:P	cm:i:9882	s1:i:98661			rl:i:0
scaffold_896	1195	4	1194	-	scaffold_9	2382659	1719776	1728693	1171	1190	0	tp:A:S	cm:i:117	s1:i:1171
scaffold_907	1126	15	1108	+	scaffold_9	2382659	1729030	1732975	1093	1093	60	tp:A:P	cm:i:108	s1:i:1093			rl:i:0
scaffold_937	1042	14	1039	-	scaffold_9	2382659	1733956	1735830	1025	1025	60	tp:A:P	cm:i:105	s1:i:1025			rl:i:0
scaffold_881	1239	10	1239	+	scaffold_9	2382659	1737270	1777989	1229	1229	0	tp:A:S	cm:i:125	s1:i:1229
scaffold_98	88593	15	88593	+	scaffold_9	2382659	1783071	1784920	88477	88580	60	tp:A:P	cm:i:8795	s1:i:88477	s2:i:2257	dv:f:0.0001	rl:i:0
scaffold_899	1133	18	1132	+	scaffold_9	2382659	1790569	1797773	1114	1114	0	tp:A:S	cm:i:106	s1:i:1114
scaffold_928	1075	0	1064	+	scaffold_9	2382659	1798223	1800356	1017	1064	0	tp:A:S	cm:i:99	s1:i:1017
scaffold_922	1059	14	1009	-	scaffold_9	2382659	1802373	1804804	995	995	60	tp:A:P	cm:i:99	s1:i:995			rl:i:0
scaffold_925	1090	8	1087	+	scaffold_9	2382659	1805058	1807411	1079	1079	60	tp:A:P	cm:i:101	s1:i:1079			rl:i:0
scaffold_918	1123	2	1113	-	scaffold_9	2382659	1807431	1810346	1079	1112	7	tp:A:P	cm:i:98	s1:i:1079			rl:i:0
scaffold_888	1213	5	1211	+	scaffold_9	2382659	1811974	1829516	1206	1206	0	tp:A:P	cm:i:111	s1:i:1206			rl:i:0
scaffold_942	1007	11	1004	+	scaffold_9	2382659	1833153	1834439	993	993	0	tp:A:P	cm:i:101	s1:i:993			rl:i:0
scaffold_88	101940	11	3140	-	scaffold_9	2382659	1847827	1903761	3129	3129	60	tp:A:P	cm:i:329	s1:i:3129			rl:i:0
scaffold_921	1115	6	1110	-	scaffold_9	2382659	1915320	1918016	1104	1104	2	tp:A:P	cm:i:109	s1:i:1104			rl:i:0
scaffold_893	1204	7	1198	-	scaffold_9	2382659	1920482	1931102	1191	1191	0	tp:A:S	cm:i:131	s1:i:1191
scaffold_894	1203	18	1197	-	scaffold_9	2382659	1937384	1947873	1179	1179	60	tp:A:P	cm:i:130	s1:i:1179			rl:i:0
scaffold_899	1133	18	1132	-	scaffold_9	2382659	1952627	1959830	1114	1114	0	tp:A:P	cm:i:106	s1:i:1114			rl:i:0
scaffold_929	1069	7	1057	+	scaffold_9	2382659	1960280	1962413	1050	1050	60	tp:A:P	cm:i:102	s1:i:1050			rl:i:0
scaffold_923	1096	12	1083	+	scaffold_9	2382659	1964426	1966855	1021	1071	60	tp:A:P	cm:i:93	s1:i:1021			rl:i:0
scaffold_926	1088	10	1078	+	scaffold_9	2382659	1967109	1969466	1068	1068	60	tp:A:P	cm:i:99	s1:i:1068			rl:i:0
scaffold_918	1123	2	1113	-	scaffold_9	2382659	1969486	1972398	1050	1111	0	tp:A:S	cm:i:96	s1:i:1050
scaffold_903	1175	15	1162	-	scaffold_9	2382659	1981082	1985300	1119	1147	0	tp:A:S	cm:i:107	s1:i:1119
scaffold_892	1212	2	1202	-	scaffold_9	2382659	1986045	1998530	1182	1200	60	tp:A:P	cm:i:117	s1:i:1180			rl:i:0
scaffold_913	1137	10	1121	+	scaffold_9	2382659	2017585	2017669	1111	1111	0	tp:A:P	cm:i:108	s1:i:1111			rl:i:0
scaffold_928	1075	0	1064	+	scaffold_9	2382659	2028963	2031151	1064	1064	12	tp:A:P	cm:i:104	s1:i:1064			rl:i:0
scaffold_890	1212	3	1210	+	scaffold_9	2382659	2034605	2047979	1207	1207	60	tp:A:P	cm:i:121	s1:i:1207			rl:i:0
scaffold_911	1147	4	1145	+	scaffold_9	2382659	2060623	2060707	1141	1141	60	tp:A:P	cm:i:115	s1:i:1141			rl:i:0
scaffold_91	97733	97583	97721	-	scaffold_9	2382659	2068065	2068149	57	139	0	tp:A:S	cm:i:3	s1:i:57
scaffold_916	1073	1	1055	+	scaffold_9	2382659	2086507	2086591	1054	1054	60	tp:A:P	cm:i:96	s1:i:1054			rl:i:0
scaffold_91	97733	97583	97705	-	scaffold_9	2382659	2113878	2113962	60	122	0	tp:A:S	cm:i:6	s1:i:60
scaffold_91	97733	97583	97721	+	scaffold_9	2382659	2146999	2147083	57	138	0	tp:A:S	cm:i:3	s1:i:57
scaffold_91	97733	97583	97721	-	scaffold_9	2382659	2165362	2165446	54	138	0	tp:A:S	cm:i:3	s1:i:54
scaffold_91	97733	97583	97683	+	scaffold_9	2382659	2173907	2173991	60	100	0	tp:A:S	cm:i:4	s1:i:60
scaffold_917	1103	18	1096	-	scaffold_9	2382659	2181885	2181931	1047	1078	60	tp:A:P	cm:i:99	s1:i:1047			rl:i:0
scaffold_91	97733	97583	97695	-	scaffold_9	2382659	2183219	2183303	50	112	0	tp:A:S	cm:i:5	s1:i:50
scaffold_913	1137	10	1121	-	scaffold_9	2382659	2199015	2199099	1111	1111	0	tp:A:S	cm:i:108	s1:i:1111
scaffold_912	1141	3	1130	+	scaffold_9	2382659	2208349	2208433	1127	1127	60	tp:A:P	cm:i:109	s1:i:1127			rl:i:0
scaffold_914	1137	14	1122	-	scaffold_9	2382659	2216427	2216511	1108	1108	2	tp:A:P	cm:i:108	s1:i:1108			rl:i:0
scaffold_915	1134	14	1122	-	scaffold_9	2382659	2225766	2225850	1090	1109	0	tp:A:S	cm:i:108	s1:i:1090
scaffold_91	97733	97583	97721	+	scaffold_9	2382659	2239633	2239717	64	138	0	tp:A:S	cm:i:4	s1:i:64
scaffold_915	1134	14	1122	-	scaffold_9	2382659	2248869	2248953	1108	1108	4	tp:A:P	cm:i:110	s1:i:1108			rl:i:19
scaffold_91	97733	97583	97721	-	scaffold_9	2382659	2258141	2258225	76	138	0	tp:A:S	cm:i:7	s1:i:76
scaffold_920	1079	2	1075	-	scaffold_9	2382659	2273331	2275988	1073	1073	60	tp:A:P	cm:i:111	s1:i:1073			rl:i:0
scaffold_904	1144	4	1130	+	scaffold_9	2382659	2275903	2279999	1096	1126	60	tp:A:P	cm:i:108	s1:i:1096			rl:i:0
scaffold_92	97096	18	97083	+	scaffold_9	2382659	2279914	2282576	97054	97065	60	tp:A:P	cm:i:9694	s1:i:97052			rl:i:0
scaffold_91	97733	97583	97721	-	scaffold_9	2382659	2288577	2288661	67	138	0	tp:A:S	cm:i:6	s1:i:67
scaffold_91	97733	97583	97721	+	scaffold_9	2382659	2316033	2316117	64	138	0	tp:A:S	cm:i:4	s1:i:64
scaffold_914	1137	14	1122	+	scaffold_9	2382659	2325099	2325183	1098	1108	0	tp:A:S	cm:i:107	s1:i:1098
scaffold_910	1035	7	1029	+	scaffold_9	2382659	2343239	2343323	1022	1022	60	tp:A:P	cm:i:106	s1:i:1022			rl:i:0
scaffold_91	97733	97664	97721	-	scaffold_9	2382659	2361749	2361833	57	57	0	tp:A:S	cm:i:6	s1:i:57
