# Supplementary material for: The Genome-Wide Characterization of Alternative Splicing and RNA Editing in the Development of Coprinopsis cinerea
Source: J Fungi (Basel). 2023 Sep 9;9(9):915. doi: 10.3390/jof9090915 (PMC10532568; doi:10.3390/jof9090915)
Supplement: Supplementary file 1 [file jof-09-00915-s001.zip › Posttranscriptional_figuretable_v3.pdf]

Supplementary materials

## Supplementary Datasets

Dataset S1. Gene count matrix by Trimmed Mean of M-values (TMM).

(DatasetS1\_Gene\_count\_log2TMMmatrix.xlsx)

Dataset S2. Alternative splicing events and percent spliced in (PSI) value in *C. cinerea* development. (DatasetS2\_Alternative\_splicing.exp5.minor05.jad6.psi.xlsx)

Dataset S3. Alternatively spliced genes.

(DatasetS3\_Alternative\_splicing.exp5.minor05.jad6.feature.xlsx)

Dataset S4. RNA editing identified in *C. cinerea* development with matrix of editing level.

(DatasetS4\_RNA\_editing.editing\_level.xlsx)

Dataset S5. Annotation of RNA editing sites found in *C. cinerea*.

(DatasetS5\_RNA\_editing.feature.xlsx)

Dataset S6. Full genome alignment of strain #326 genome (Muraguchi et al., 2015) to (Xie et al., 2021).

(DatasetS6\_full\_genome\_alignment\_of\_Muraguchi2015\_against\_Xie2021.xlsx)

## Supplementary Tables

Table S1. Sample collection, sequencing quality and alignment rate.

Table S2. Primers used in this study.

Table S3. Number of expressed genes in *C. cinerea* development, CPM > 1 in at least two replicates.

Table S4. Functional enrichment summary of DEGs.

Table S5. Wilcoxon test on PSI score of nine developmental stages.

Table S6. Number of RNA editing sites identified during *C. cinerea* development.

Table S7. Wilcoxon test on RNA editing levels of nine developmental stages.

Table S8. Wilcoxon test on RNA editing levels of twelve editing types.

## Supplementary Figures

Figure S1. Cross dissection of pileus under high power microscope (400 ×).

Figure S2. Pie chart showing the summary of gene expression levels.

Figure S3. Volcano plot showing the distribution of gene expression changes.

Figure S4. KOG enrichment analysis on gene clusters.

Figure S5. KEGG enrichment analysis on gene clusters.

Figure S6. GO enrichment analysis on gene clusters.

Figure S7. PSI score of AS events identified in nine developmental stages.

Figure S8. PSI score of eight AS types in nine developmental stages.

Figure S9. PSI score of nine developmental stages in eight AS types.

Figure S10. Quantitative relation of gene expression and PSI value of alternatively spliced genes.

Figure S11. Scatter plots showing the changes on expression levels of alternative spliced genes and their PSI scores.

Figure S12. Summary on differentially spliced events between stages.

Figure S13. KOG annotation on developmentally regulated alternative splicing specific to the developmental process.

Figure S14. Common RNA editing sites among different stages.

Figure S15. Statistics on RNA editing sites identified from Muraguchi et al. (2015).

Figure S16. Common RNA editing sites identified from transcriptome data generated by Muraguchi et al. (2015).

Figure S17. Validation of RNA editing on hypothetical protein (CC2G\_003350, scaffold\_11: 1716350U>C).

Figure S18. Functional annotation of genes with RNA editing.

Figure S19. KO annotation of genes with RNA editing.

Figure S20. Expression levels of nucleoside deaminase annotated in *C. cinerea*.

Table S1. Sample collection, sequencing quality and alignment rate.

| Stage<br>(Abb.)                                                       | Incubation                                                                              | Sample | Clean<br>reads | Clean<br>bases | Q20<br>(%) | Q30<br>(%) | GC<br>(%) | Mapping<br>rate (%) | Mapped reads<br>(deduplicated) |
|-----------------------------------------------------------------------|-----------------------------------------------------------------------------------------|--------|----------------|----------------|------------|------------|-----------|---------------------|--------------------------------|
| <b>Vegetative mycelia<br/>(Myc)</b>                                   | Continuous darkness at 37 °C<br>for 4 d                                                 | Myc1   | 25,085,950     | 3,762,892,500  | 97.7       | 93.7       | 54.5      | 93.87               | 15,936,386                     |
|                                                                       |                                                                                         | Myc2   | 32,513,954     | 4,877,093,100  | 97.8       | 93.9       | 54.5      | 94.28               | 20,024,836                     |
|                                                                       |                                                                                         | Myc3   | 26,208,640     | 3,931,296,000  | 97.7       | 93.7       | 54.5      | 94.38               | 17,280,727                     |
| <b>Oidia forming mycelia<br/>(Oidia)</b>                              | Continuous light at 37 °C for<br>4 d                                                    | Oidia1 | 31,417,198     | 4,712,579,700  | 97.5       | 93.2       | 54.1      | 95.01               | 20,476,670                     |
|                                                                       |                                                                                         | Oidia2 | 30,190,208     | 4,528,531,200  | 97.8       | 93.8       | 54.3      | 95.06               | 19,248,283                     |
|                                                                       |                                                                                         | Oidia3 | 29,196,406     | 4,379,460,900  | 97.7       | 93.7       | 54.3      | 94.58               | 18,912,548                     |
| <b>Sclerotia forming mycelia<br/>(Scl)</b>                            | Continuous darkness at 37 °C<br>for 12 d                                                | Scl1   | 32,972,822     | 4,945,923,300  | 94.1       | 85.7       | 53.9      | 92.55               | 21,480,526                     |
|                                                                       |                                                                                         | Scl2   | 37,357,474     | 5,603,621,100  | 95.0       | 87.6       | 54.0      | 92.89               | 24,696,908                     |
|                                                                       |                                                                                         | Scl3   | 29,848,036     | 4,477,205,400  | 94.4       | 86.1       | 54.0      | 93.14               | 20,434,835                     |
| <b>Mycelia with hyphal knots<br/>(Knot)</b>                           | Continuous darkness at 37 °C<br>for 5.5 d, and 12 h:12 h light–<br>dark cycle for 1 d   | Knot1  | 28,412,998     | 4,261,949,700  | 97.8       | 93.8       | 54.0      | 94.43               | 18,137,097                     |
|                                                                       |                                                                                         | Knot2  | 31,571,766     | 4,735,764,900  | 97.7       | 93.7       | 54.3      | 93.65               | 18,237,961                     |
|                                                                       |                                                                                         | Knot3  | 34,713,178     | 5,206,976,700  | 97.8       | 94.0       | 54.5      | 93.39               | 20,334,292                     |
| <b>Primordia undergoing meiosis<br/>(Pri)</b>                         | Continuous darkness at 37 °C<br>for 5.5 d, and 12 h:12 h light–<br>dark cycle for 6 d   | Pri1   | 24,910,904     | 3,736,635,600  | 97.8       | 93.9       | 54.0      | 94.78               | 16,965,939                     |
|                                                                       |                                                                                         | Pri2   | 24,551,978     | 3,682,796,700  | 97.7       | 93.8       | 54.2      | 94.26               | 17,247,702                     |
|                                                                       |                                                                                         | Pri3   | 25,494,022     | 3,824,103,300  | 97.4       | 92.8       | 54.2      | 94.26               | 18,233,166                     |
| <b>Young fruiting bodies<br/>undergoing spore formation<br/>(YFB)</b> | Continuous darkness at 37 °C<br>for 5.5 d, and 12 h:12 h light–<br>dark cycle for 6.5 d | YFB1   | 26,599,914     | 3,989,987,100  | 97.7       | 93.7       | 54.1      | 94.92               | 17,311,918                     |
|                                                                       |                                                                                         | YFB2   | 24,264,552     | 3,639,682,800  | 97.7       | 93.8       | 54.2      | 94.56               | 16,574,052                     |
|                                                                       |                                                                                         | YFB3   | 28,400,844     | 4,260,126,600  | 97.8       | 93.8       | 54.1      | 95.31               | 18,221,676                     |
| <b>Mature basidiospores<br/>(BS)</b>                                  | Basidiospore discharged from<br>mature cap                                              | BS1    | 17,064,684     | 2,546,579,938  | 96.6       | 91.1       | 54.2      | 93.60               | 12,093,628                     |
|                                                                       |                                                                                         | BS2    | 17,492,502     | 2,606,856,924  | 96.6       | 90.9       | 54.0      | 93.46               | 10,770,048                     |
|                                                                       |                                                                                         | BS3    | 17,355,936     | 2,586,947,642  | 96.7       | 91.1       | 54.2      | 93.78               | 11,111,413                     |
| <b>Half germinating basidiospores<br/>(BS12h)</b>                     | Continuous darkness at 37 °C<br>for 12 h, broth 150 rpm                                 | BS12h1 | 17,126,036     | 2,546,749,128  | 94.3       | 87.6       | 45.9      | 9.28                | 832,554                        |
|                                                                       |                                                                                         | BS12h2 | 17,158,542     | 2,552,883,760  | 95.2       | 88.9       | 49.3      | 27.17               | 2,431,668                      |
|                                                                       |                                                                                         | BS12h3 | 17,244,842     | 2,571,283,772  | 95.6       | 89.8       | 49.5      | 29.61               | 2,544,746                      |
| <b>Fully germinated basidiospores<br/>(BS24h)</b>                     | Continuous darkness at 37 °C<br>for 24 h, broth 150 rpm                                 | BS24h1 | 17,162,606     | 2,556,983,164  | 96.6       | 91.0       | 54.5      | 93.12               | 11,181,138                     |
|                                                                       |                                                                                         | BS24h2 | 16,525,520     | 2,461,013,426  | 96.7       | 91.3       | 54.5      | 93.08               | 10,628,646                     |
|                                                                       |                                                                                         | BS24h3 | 16,917,964     | 2,519,857,620  | 95.9       | 90.0       | 52.0      | 61.54               | 6,686,954                      |
| <b>Genomic DNA</b>                                                    | Continuous darkness at 37 °C                                                            | DNA    | 9,213,544      | 1,382,031,600  | 98.0       | 94.4       | 50.3      | 98.84               | 8,068,437                      |

Table S2. Primers used in this study.

|                   | Target                                                        |   | Sequence (5' → 3')         |
|-------------------|---------------------------------------------------------------|---|----------------------------|
| <b>PCR-Sanger</b> | Hypothetical protein                                          | F | TTCAGCGTCTTTCGCTGCAAT      |
|                   | (CC2G_003350, scaffold_11: 1716350T>C)                        | R | CTCATCGAACGCAAGTTTCGG      |
|                   | Spliceosomal U1 snRNP C                                       | F | ACTCACGACTCGGCTTCAG        |
|                   | (CC2G_010208)                                                 | R | TGGGCCGTTAAATCCACCTG       |
|                   | STE/STE11 protein kinase                                      | F | GGTGGACTATCTGCCTGGTC       |
|                   | (CC2G_011916)                                                 | R | GCCACTTTCCTTACGGAGG        |
|                   | RhoGAP                                                        | F | CTGGAGCTAGCCAACCTTCG       |
|                   | (CC2G_009456)                                                 | R | CAACACAGCACGGGTTTGAC       |
| <b>qRT-PCR</b>    | 18S rRNA                                                      | F | GCCTGTTTGAGTGTCAATTAATTCTC |
|                   |                                                               | R | CTGCAACCCCCACATCCA         |
|                   | Adenosine deaminase-like protein                              | F | GAGAGTGCCTGGACATAGCC       |
|                   | (CC2G_001628)                                                 | R | CGCAAAGAACGTCTGGAACG       |
|                   | Guanine deaminase                                             | F | ACCACGACAACCTTCTACGG       |
|                   | (CC2G_005289)                                                 | R | TCGATGTTTCCGGTTGGTCC       |
|                   | adenosine deaminase                                           | F | GGTCAACGCCCAGGTTCTTA       |
|                   | (CC2G_005434)                                                 | R | ATACTCGTCGCTGCATGTCC       |
|                   | tRNA specific adenosine deaminase                             | F | ATCGATTGCATCCTCAGCGA       |
|                   | (CC2G_010905)                                                 | R | TGATGCACGGCTCTACTGTG       |
|                   | cytosine deaminase-uracil phosphoribosyltransferase deaminase | F | AAGTGCTCATCGAACACGGT       |
|                   | (CC2G_011103)                                                 | R | TCACTTTGAGCGACGGGAAG       |
|                   | cytidine deaminase                                            | F | CGTATTCGCGGTTTCCTGTG       |
|                   | (CC2G_012163)                                                 | R | CAGCGCAGATAGTTCCACCA       |
|                   | AMP deaminase                                                 | F | GTACAGCCTGCTGAACGAGT       |
|                   | (CC2G_012607)                                                 | R | TGGACTTGATGAACCGGAGC       |
|                   | tRNA specific adenosine deaminase                             | F | TGCTTTGGGACTCGGTTCTC       |
|                   | (CC2G_012760)                                                 | R | TTCTCCAGGTTTCGATGTCGC      |

Table S3. Number of expressed genes in *C. cinerea* development, CPM > 1 in at least two replicates.

| Stage                                            | (Abb.)  | Number of genes |
|--------------------------------------------------|---------|-----------------|
| Vegetative mycelia                               | (Myc)   | 11,333          |
| Oidia forming mycelia                            | (Oidia) | 11,269          |
| Sclerotia forming mycelia                        | (Scl)   | 11,075          |
| Mycelia with hyphal knots                        | (Knot)  | 11,396          |
| Primordia undergoing meiosis                     | (Pri)   | 11,392          |
| Young fruiting bodies undergoing spore formation | (YFB)   | 10,722          |
| Mature basidiospores                             | (BS)    | 10,043          |
| Half germinating basidiospores                   | (BS12h) | 10,301          |
| Fully germinated basidiospores                   | (BS24h) | 10,060          |
| Total                                            |         | 12,450          |

Table S4. Functional enrichment summary of DEGs.

| Groups   | ID         | Description                                          | ONTOLOGY           |
|----------|------------|------------------------------------------------------|--------------------|
| cluster1 | GO:0020037 | heme binding                                         | Molecular Function |
| cluster1 | GO:0004553 | hydrolase activity, hydrolyzing O-glycosyl compounds | Molecular Function |
| cluster2 | GO:0020037 | heme binding                                         | Molecular Function |
| cluster2 | GO:0030248 | cellulose binding                                    | Molecular Function |
| cluster2 | GO:0016831 | carboxy-lyase activity                               | Molecular Function |
| cluster2 | GO:0046872 | metal ion binding                                    | Molecular Function |
| cluster5 | GO:0051539 | 4 iron, 4 sulfur cluster binding                     | Molecular Function |
| cluster5 | GO:0008168 | methyltransferase activity                           | Molecular Function |
| cluster6 | GO:0003723 | RNA binding                                          | Molecular Function |
| cluster1 | GO:0016021 | integral component of membrane                       | Cellular Component |
| cluster2 | GO:0016021 | integral component of membrane                       | Cellular Component |
| cluster2 | GO:0005618 | cell wall                                            | Cellular Component |
| cluster2 | GO:0009277 | fungal-type cell wall                                | Cellular Component |
| cluster3 | GO:0016021 | integral component of membrane                       | Cellular Component |
| cluster3 | GO:0098803 | respiratory chain complex                            | Cellular Component |
| cluster3 | GO:0098800 | inner mitochondrial membrane protein complex         | Cellular Component |
| cluster3 | GO:0000323 | lytic vacuole                                        | Cellular Component |
| cluster4 | GO:0016021 | integral component of membrane                       | Cellular Component |
| cluster4 | GO:1905369 | endopeptidase complex                                | Cellular Component |
| cluster4 | GO:0005839 | proteasome core complex                              | Cellular Component |
| cluster5 | GO:0005730 | nucleolus                                            | Cellular Component |
| cluster5 | GO:0043232 | intracellular non-membrane-bounded organelle         | Cellular Component |
| cluster5 | GO:0005840 | ribosome                                             | Cellular Component |
| cluster5 | GO:0043231 | intracellular membrane-bounded organelle             | Cellular Component |
| cluster5 | GO:0070013 | intracellular organelle lumen                        | Cellular Component |
| cluster6 | GO:0005840 | ribosome                                             | Cellular Component |
| cluster6 | GO:0043232 | intracellular non-membrane-bounded organelle         | Cellular Component |
| cluster6 | GO:0005739 | mitochondrion                                        | Cellular Component |

Table S4. Functional enrichment summary of DEGs (continued).

| <b>Groups</b> | <b>ID</b>  | <b>Description</b>                                     | <b>ONTOLOGY</b>    |
|---------------|------------|--------------------------------------------------------|--------------------|
| cluster3      | GO:0043436 | oxoacid metabolic process                              | Biological Process |
| cluster3      | GO:1901605 | alpha-amino acid metabolic process                     | Biological Process |
| cluster3      | GO:0055086 | nucleobase-containing small molecule metabolic process | Biological Process |
| cluster3      | GO:0006520 | cellular amino acid metabolic process                  | Biological Process |
| cluster3      | GO:0072524 | pyridine-containing compound metabolic process         | Biological Process |
| cluster3      | GO:0006753 | nucleoside phosphate metabolic process                 | Biological Process |
| cluster4      | GO:0007186 | G protein-coupled receptor signaling pathway           | Biological Process |
| cluster5      | GO:0022613 | ribonucleoprotein complex biogenesis                   | Biological Process |
| cluster5      | GO:1901566 | organonitrogen compound biosynthetic process           | Biological Process |
| cluster5      | GO:0016053 | organic acid biosynthetic process                      | Biological Process |
| cluster6      | GO:0006518 | peptide metabolic process                              | Biological Process |
| cluster6      | GO:0043603 | cellular amide metabolic process                       | Biological Process |
| cluster6      | GO:1901566 | organonitrogen compound biosynthetic process           | Biological Process |
| cluster6      | GO:0044267 | cellular protein metabolic process                     | Biological Process |
| cluster6      | GO:0010467 | gene expression                                        | Biological Process |
| cluster6      | GO:0019538 | protein metabolic process                              | Biological Process |

Table S5. Wilcoxon test on PSI score of nine developmental stages.

| Group1 | Group2 | p        | p.adj    | p.format | p.signif |
|--------|--------|----------|----------|----------|----------|
| BS     | BS12h  | 0.858611 | 1        | 0.85861  | ns       |
| BS     | Oidia  | 8.24E-07 | 2.90E-05 | 8.20E-07 | ****     |
| BS     | Scl    | 4.15E-06 | 0.00014  | 4.10E-06 | ****     |
| BS     | BS12h  | 3.18E-07 | 1.10E-05 | 3.20E-07 | ****     |
| BS     | Knot   | 6.55E-06 | 0.00022  | 6.60E-06 | ****     |
| BS     | Myc    | 0.000219 | 0.0068   | 0.00022  | ***      |
| BS     | YFB    | 0.002648 | 0.079    | 0.00265  | **       |
| BS     | Pri    | 0.01848  | 0.5      | 0.01848  | *        |
| BS     | BS24h  | 1.86E-05 | 6.00E-04 | 1.90E-05 | ****     |
| Oidia  | Scl    | 0.723552 | 1        | 0.72355  | ns       |
| Oidia  | BS12h  | 0.867384 | 1        | 0.86738  | ns       |
| Oidia  | Knot   | 0.578461 | 1        | 0.57846  | ns       |
| Oidia  | Myc    | 0.253901 | 1        | 0.2539   | ns       |
| Oidia  | YFB    | 0.03807  | 0.89     | 0.03807  | *        |
| Oidia  | Pri    | 0.011542 | 0.32     | 0.01154  | *        |
| Oidia  | BS24h  | 0.850476 | 1        | 0.85048  | ns       |
| Scl    | BS12h  | 0.642752 | 1        | 0.64275  | ns       |
| Scl    | Knot   | 0.854224 | 1        | 0.85422  | ns       |
| Scl    | Myc    | 0.439598 | 1        | 0.4396   | ns       |
| Scl    | YFB    | 0.085381 | 1        | 0.08538  | ns       |
| Scl    | Pri    | 0.028827 | 0.72     | 0.02883  | *        |
| Scl    | BS24h  | 0.891506 | 1        | 0.89151  | ns       |
| BS12h  | Knot   | 0.466307 | 1        | 0.46631  | ns       |
| BS12h  | Myc    | 0.207701 | 1        | 0.2077   | ns       |
| BS12h  | YFB    | 0.025464 | 0.66     | 0.02546  | *        |
| BS12h  | Pri    | 0.007177 | 0.21     | 0.00718  | **       |
| BS12h  | BS24h  | 0.757683 | 1        | 0.75768  | ns       |
| Knot   | Myc    | 0.524763 | 1        | 0.52476  | ns       |
| Knot   | YFB    | 0.12103  | 1        | 0.12103  | ns       |
| Knot   | Pri    | 0.040944 | 0.9      | 0.04094  | *        |
| Knot   | BS24h  | 0.759005 | 1        | 0.759    | ns       |
| Myc    | YFB    | 0.387848 | 1        | 0.38785  | ns       |
| Myc    | Pri    | 0.179955 | 1        | 0.17996  | ns       |
| Myc    | BS24h  | 0.393579 | 1        | 0.39358  | ns       |
| YFB    | Pri    | 0.591205 | 1        | 0.59121  | ns       |
| YFB    | BS24h  | 0.092002 | 1        | 0.092    | ns       |
| Pri    | BS24h  | 0.036983 | 0.89     | 0.03698  | *        |

Table S6. Number of RNA editing sites identified during *C. cinerea* development.

| Stage | RE sites | Stage-specific RE sites | Mean editing level | Sample | RE events |
|-------|----------|-------------------------|--------------------|--------|-----------|
| BS    | 24       | 13                      | 0.143              | BS1    | 13        |
|       |          |                         |                    | BS2    | 18        |
|       |          |                         |                    | BS3    | 19        |
| BS12h | 7        | 4                       | 0.0879             | BS12h1 | 2         |
|       |          |                         |                    | BS12h2 | 6         |
|       |          |                         |                    | BS12h3 | 6         |
| BS24h | 17       | 4                       | 0.0685             | BS24h1 | 17        |
|       |          |                         |                    | BS24h2 | 17        |
|       |          |                         |                    | BS24h3 | 0         |
| Myc   | 29       | 12                      | 0.100              | Myc1   | 22        |
|       |          |                         |                    | Myc2   | 23        |
|       |          |                         |                    | Myc3   | 19        |
| Oidia | 24       | 6                       | 0.105              | Oidia1 | 18        |
|       |          |                         |                    | Oidia2 | 19        |
|       |          |                         |                    | Oidia3 | 17        |
| Scl   | 141      | 97                      | 0.0665             | Scl1   | 114       |
|       |          |                         |                    | Scl2   | 119       |
|       |          |                         |                    | Scl3   | 100       |
| Knot  | 33       | 13                      | 0.0685             | Knot1  | 23        |
|       |          |                         |                    | Knot2  | 31        |
|       |          |                         |                    | Knot3  | 23        |
| Pri   | 21       | 3                       | 0.0872             | Pri1   | 15        |
|       |          |                         |                    | Pri2   | 17        |
|       |          |                         |                    | Pri3   | 18        |
| YFB   | 22       | 11                      | 0.0849             | YFB1   | 20        |
|       |          |                         |                    | YFB2   | 14        |
|       |          |                         |                    | YFB3   | 15        |
| Total | 217      | 163                     | 0.0810             |        | 726       |

Table S7. Wilcoxon test on RNA editing levels of nine developmental stages.

| Group1 | Group2 | p    | p.adj | p.format | p.signif |
|--------|--------|------|-------|----------|----------|
| Pri    | Scl    | 0.65 | 1     | 0.65     | ns       |
| Pri    | Oidia  | 0.76 | 1     | 0.76     | ns       |
| Pri    | YFB    | 0.77 | 1     | 0.77     | ns       |
| Pri    | BS     | 0.10 | 1     | 0.10     | ns       |
| Pri    | BS24h  | 0.12 | 1     | 0.12     | ns       |
| Pri    | Knot   | 0.56 | 1     | 0.56     | ns       |
| Pri    | Myc    | 0.52 | 1     | 0.52     | ns       |
| Pri    | BS12h  | 0.04 | 1     | 0.04     | *        |
| Scl    | Oidia  | 0.92 | 1     | 0.92     | ns       |
| Scl    | YFB    | 0.37 | 1     | 0.37     | ns       |
| Scl    | BS     | 0.07 | 1     | 0.07     | ns       |
| Scl    | BS24h  | 0.11 | 1     | 0.11     | ns       |
| Scl    | Knot   | 0.70 | 1     | 0.70     | ns       |
| Scl    | Myc    | 0.67 | 1     | 0.67     | ns       |
| Scl    | BS12h  | 0.04 | 1     | 0.04     | *        |
| Oidia  | YFB    | 0.56 | 1     | 0.56     | ns       |
| Oidia  | BS     | 0.18 | 1     | 0.18     | ns       |
| Oidia  | BS24h  | 0.20 | 1     | 0.20     | ns       |
| Oidia  | Knot   | 0.70 | 1     | 0.70     | ns       |
| Oidia  | Myc    | 0.76 | 1     | 0.76     | ns       |
| Oidia  | BS12h  | 0.08 | 1     | 0.08     | ns       |
| YFB    | BS     | 0.05 | 1     | 0.05     | ns       |
| YFB    | BS24h  | 0.06 | 1     | 0.06     | ns       |
| YFB    | Knot   | 0.32 | 1     | 0.32     | ns       |
| YFB    | Myc    | 0.33 | 1     | 0.33     | ns       |
| YFB    | BS12h  | 0.02 | 0.81  | 0.02     | *        |
| BS     | BS24h  | 0.97 | 1     | 0.97     | ns       |
| BS     | Knot   | 0.21 | 1     | 0.22     | ns       |
| BS     | Myc    | 0.27 | 1     | 0.27     | ns       |
| BS     | BS12h  | 0.40 | 1     | 0.40     | ns       |
| BS24h  | Knot   | 0.24 | 1     | 0.24     | ns       |
| BS24h  | Myc    | 0.34 | 1     | 0.34     | ns       |
| BS24h  | BS12h  | 0.34 | 1     | 0.34     | ns       |
| Knot   | Myc    | 0.93 | 1     | 0.93     | ns       |
| Knot   | BS12h  | 0.07 | 1     | 0.07     | ns       |
| Myc    | BS12h  | 0.12 | 1     | 0.12     | ns       |

Table S8. Wilcoxon test on RNA editing levels of twelve editing types.

| Group<br>1 | Group<br>2 | P    | P<br>adj | P<br>format | P<br>signif | Group<br>1 | Group<br>2 | P    | P<br>adj | P<br>format | P<br>signif |
|------------|------------|------|----------|-------------|-------------|------------|------------|------|----------|-------------|-------------|
| TC         | AG         | 0.24 | 1        | 0.24        | ns          | CT         | TG         | 0.85 | 1        | 0.85        | ns          |
| TC         | CG         | 0.02 | 1        | 0.02        | *           | CT         | AC         | 0.05 | 1        | 0.05        | ns          |
| TC         | CT         | 0.47 | 1        | 0.47        | ns          | CT         | GC         | 0.07 | 1        | 0.07        | ns          |
| TC         | GA         | 0.29 | 1        | 0.29        | ns          | CT         | TA         | 0.93 | 1        | 0.93        | ns          |
| TC         | GT         | 0.05 | 1        | 0.05        | ns          | CT         | CA         | 0.72 | 1        | 0.72        | ns          |
| TC         | AT         | 0.01 | 0.33     | 0.01        | **          | GA         | GT         | 0.14 | 1        | 0.14        | ns          |
| TC         | TG         | 0.87 | 1        | 0.87        | ns          | GA         | AT         | 0.01 | 0.5      | 0.01        | **          |
| TC         | AC         | 0.06 | 1        | 0.06        | ns          | GA         | TG         | 0.84 | 1        | 0.84        | ns          |
| TC         | GC         | 0.03 | 1        | 0.03        | *           | GA         | AC         | 0.15 | 1        | 0.15        | ns          |
| TC         | TA         | 0.82 | 1        | 0.82        | ns          | GA         | GC         | 0.01 | 0.5      | 0.01        | **          |
| TC         | CA         | 0.96 | 1        | 0.96        | ns          | GA         | TA         | 0.68 | 1        | 0.68        | ns          |
| AG         | CG         | 0.03 | 1        | 0.03        | *           | GA         | CA         | 0.75 | 1        | 0.75        | ns          |
| AG         | CT         | 0.09 | 1        | 0.09        | ns          | GT         | AT         | 0.15 | 1        | 0.15        | ns          |
| AG         | GA         | 0.92 | 1        | 0.92        | ns          | GT         | TG         | 0.39 | 1        | 0.39        | ns          |
| AG         | GT         | 0.13 | 1        | 0.13        | ns          | GT         | AC         | 0.65 | 1        | 0.65        | ns          |
| AG         | AT         | 0.00 | 0.24     | 0.00        | **          | GT         | GC         | 0.01 | 0.41     | 0.01        | **          |
| AG         | TG         | 0.78 | 1        | 0.78        | ns          | GT         | TA         | 0.32 | 1        | 0.32        | ns          |
| AG         | AC         | 0.07 | 1        | 0.07        | ns          | GT         | CA         | 0.24 | 1        | 0.24        | ns          |
| AG         | GC         | 0.01 | 0.42     | 0.01        | **          | AT         | TG         | 0.07 | 1        | 0.07        | ns          |
| AG         | TA         | 0.69 | 1        | 0.69        | ns          | AT         | AC         | 0.65 | 1        | 0.65        | ns          |
| AG         | CA         | 0.69 | 1        | 0.69        | ns          | AT         | GC         | 0.00 | 0.2      | 0.00        | **          |
| CG         | CT         | 0.01 | 0.46     | 0.01        | **          | AT         | TA         | 0.07 | 1        | 0.07        | ns          |
| CG         | GA         | 0.04 | 1        | 0.04        | *           | AT         | CA         | 0.03 | 1        | 0.03        | *           |
| CG         | GT         | 0.52 | 1        | 0.52        | ns          | TG         | AC         | 0.17 | 1        | 0.17        | ns          |
| CG         | AT         | 0.33 | 1        | 0.33        | ns          | TG         | GC         | 0.64 | 1        | 0.64        | ns          |
| CG         | TG         | 0.23 | 1        | 0.23        | ns          | TG         | TA         | 0.70 | 1        | 0.70        | ns          |
| CG         | AC         | 0.84 | 1        | 0.84        | ns          | TG         | CA         | 1.00 | 1        | 1.00        | ns          |
| CG         | GC         | 0.01 | 0.38     | 0.01        | **          | AC         | GC         | 0.02 | 1        | 0.02        | *           |
| CG         | TA         | 0.21 | 1        | 0.21        | ns          | AC         | TA         | 0.19 | 1        | 0.19        | ns          |
| CG         | CA         | 0.10 | 1        | 0.10        | ns          | AC         | CA         | 0.17 | 1        | 0.17        | ns          |
| CT         | GA         | 0.13 | 1        | 0.13        | ns          | GC         | TA         | 0.53 | 1        | 0.53        | ns          |
| CT         | GT         | 0.02 | 1        | 0.02        | *           | GC         | CA         | 0.22 | 1        | 0.22        | ns          |
| CT         | AT         | 0.00 | 0.16     | 0.00        | **          | TA         | CA         | 1.00 | 1        | 1.00        | ns          |

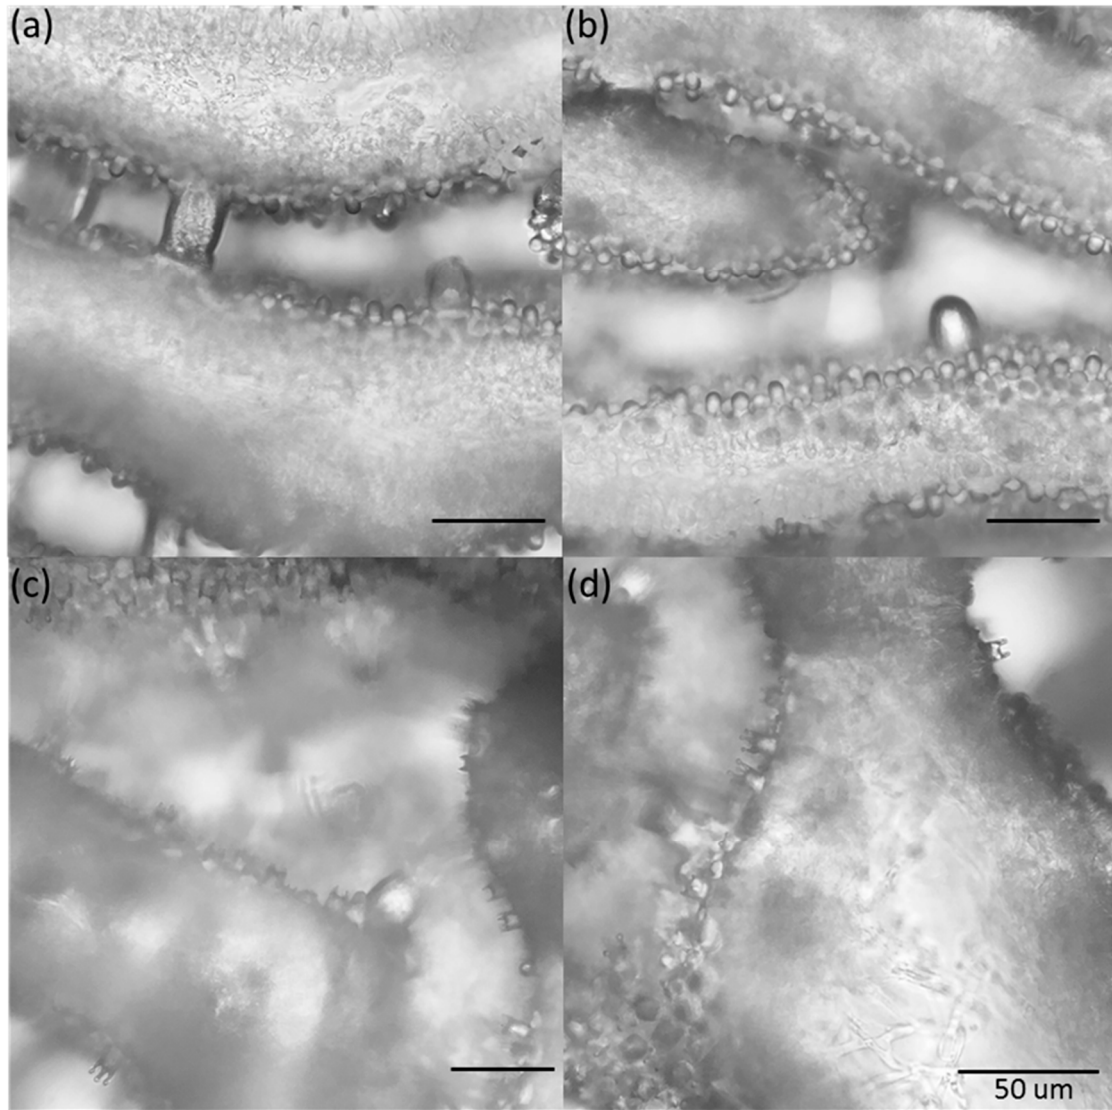

Figure S1. Cross dissection of pileus under high power microscope (400  $\times$ ). (a) and (b) Primordium contains the meiosis tissue. (c) and (d) Young fruiting body contains the tissue undergoing basidiospore formation.

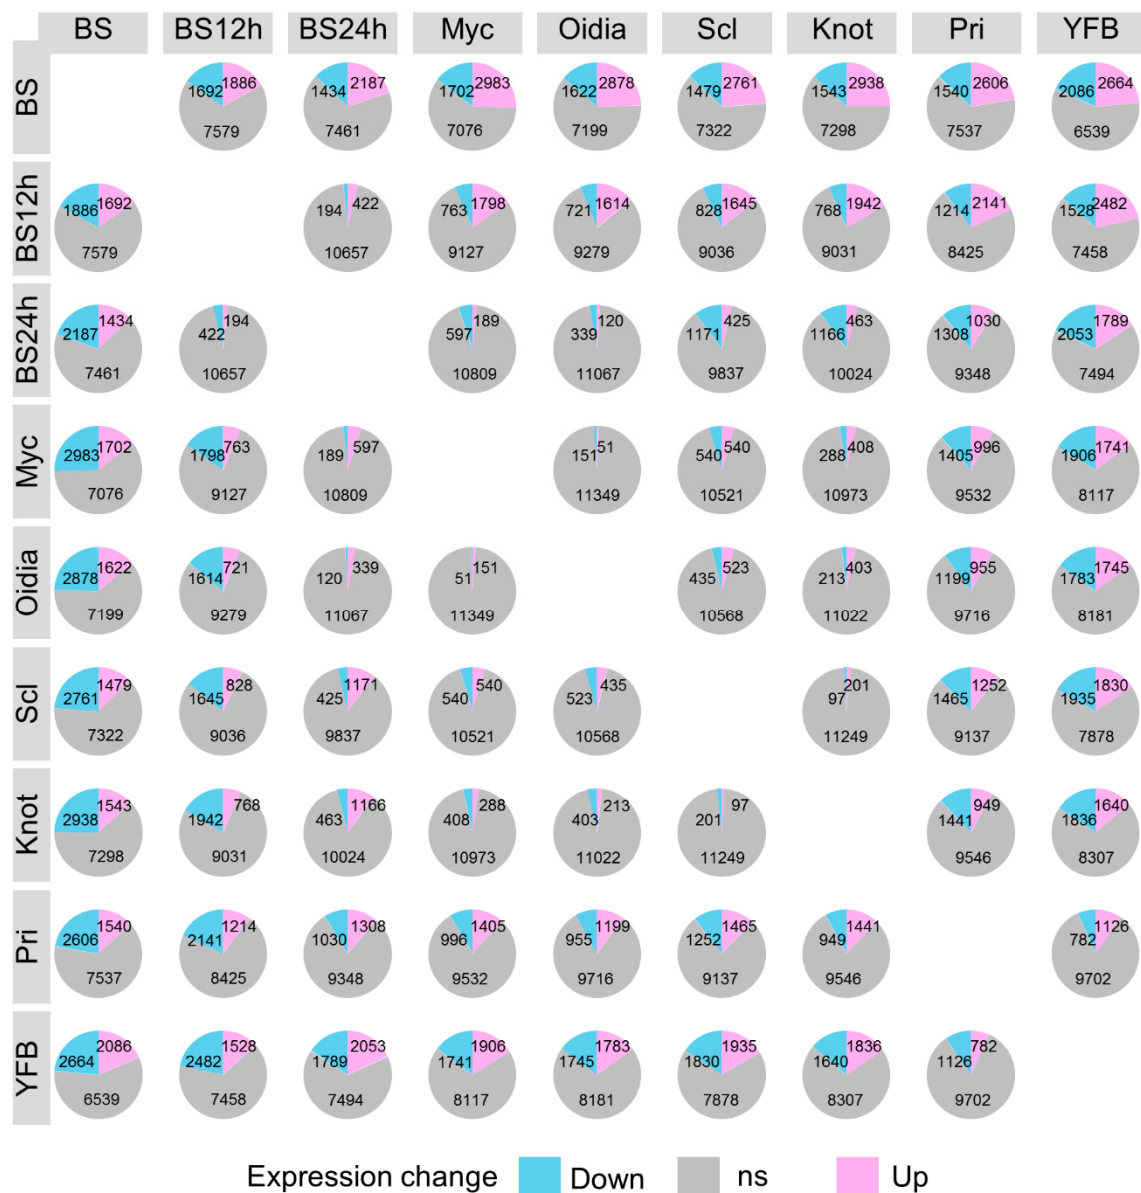

Figure S2. Pie chart showing the summary of gene expression levels. Sample of each column were compared against sample of each row, for example, compare to BS, 1,886 genes were up-regulated, and 1,692 genes were down-regulated in BS12h.

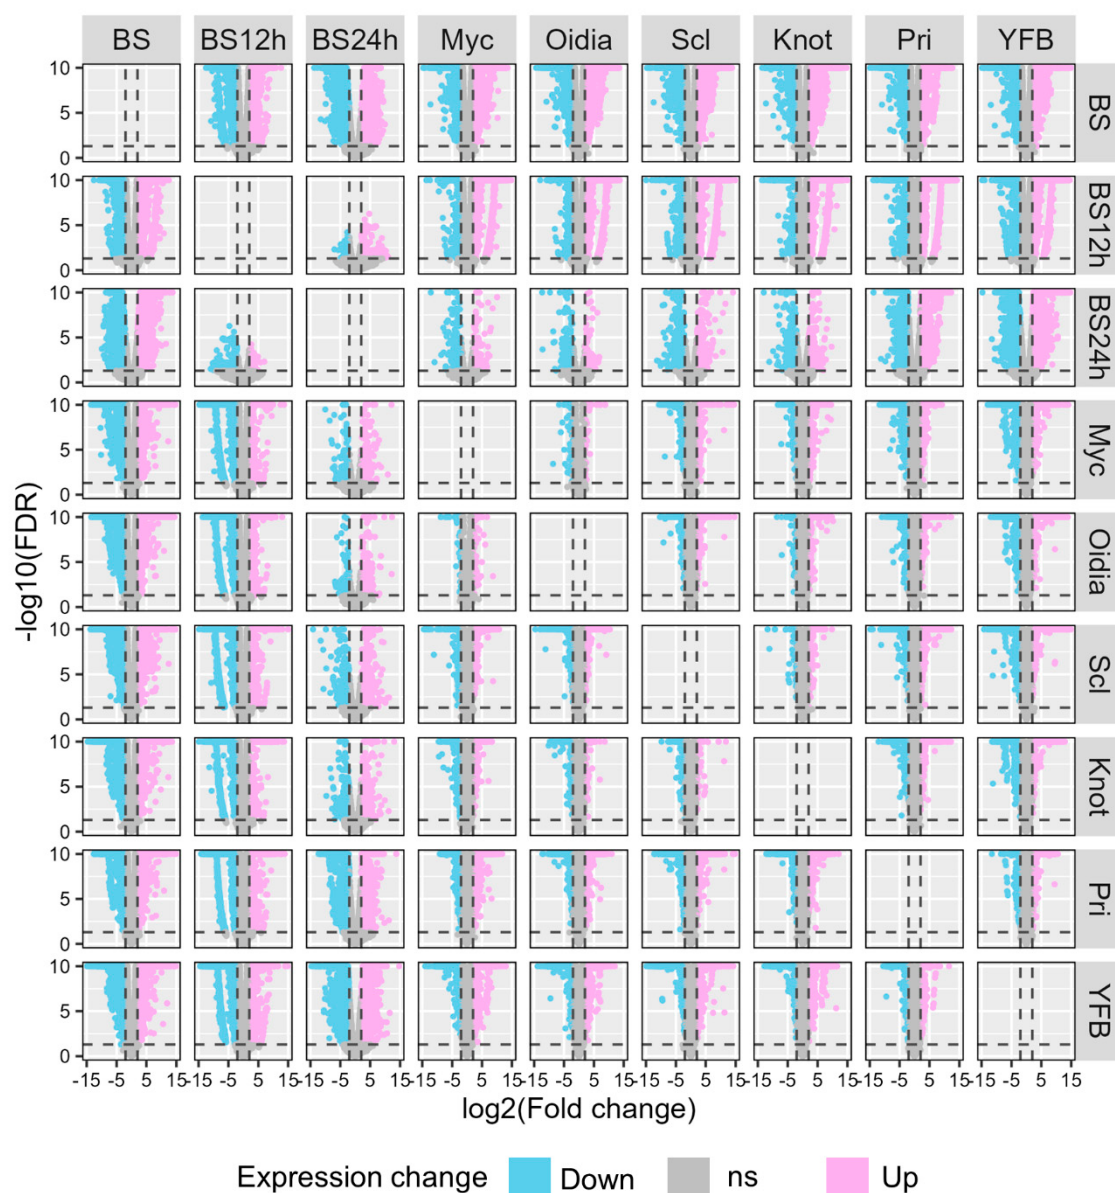

Figure S3. Volcano plot showing the distribution of gene expression changes. Sample of each column were compared against sample of each row, for example, compare to BS, 1,886 genes were up-regulated, and 1,692 genes were down-regulated in BS12h.

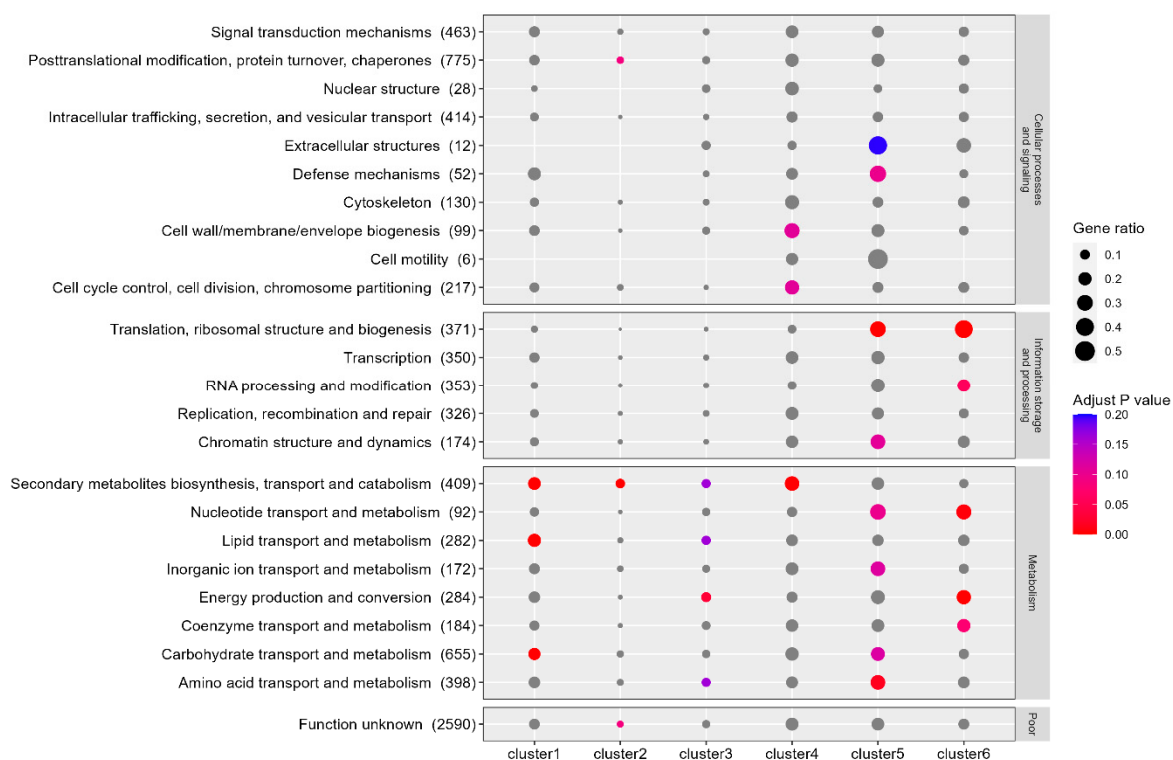

Figure S4. KOG enrichment analysis on gene clusters. Numbers of genes annotated to specific KOG term are listed beside the term. Gene ratio is calculated by annotated genes of specific KOG term in each cluster over annotated genes of specific KOG term in the genome background. Enriched groups with Benjamini and Hochberg method (BH) adjusted p value  $\leq 0.20$  are coloured red to blue, others are in grey.

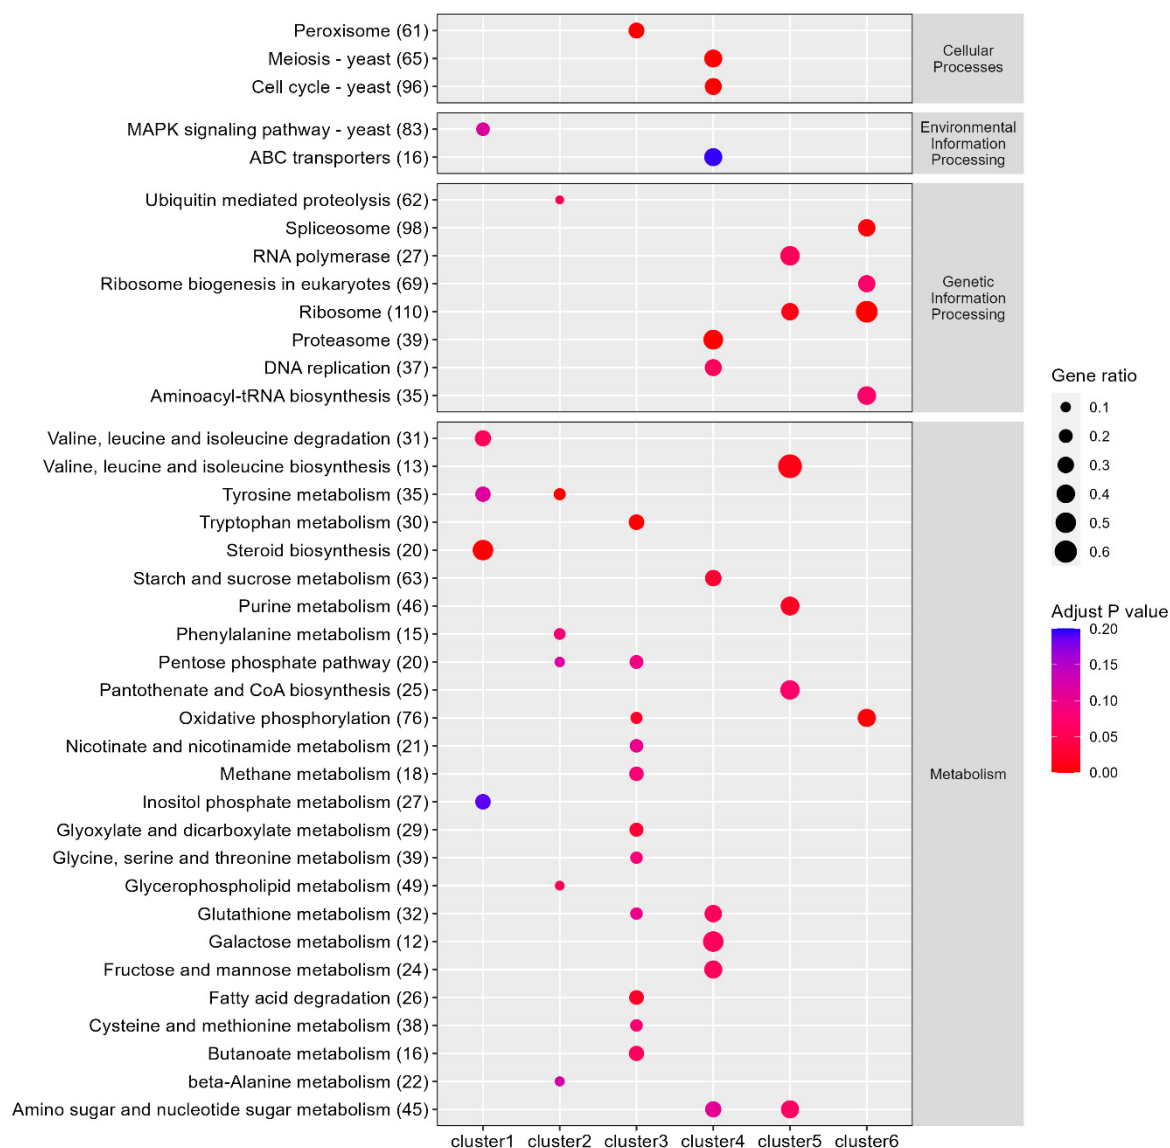

Figure S5. KEGG enrichment analysis on gene clusters. Numbers of genes annotated to specific KEGG pathway are listed beside the term. Gene ratio is calculated by annotated genes of specific KEGG pathway in each cluster over annotated genes of specific KEGG pathway in the genome background. Enriched groups with Benjamini and Hochberg method (BH) adjusted p value  $\leq 0.20$  are coloured red to blue.

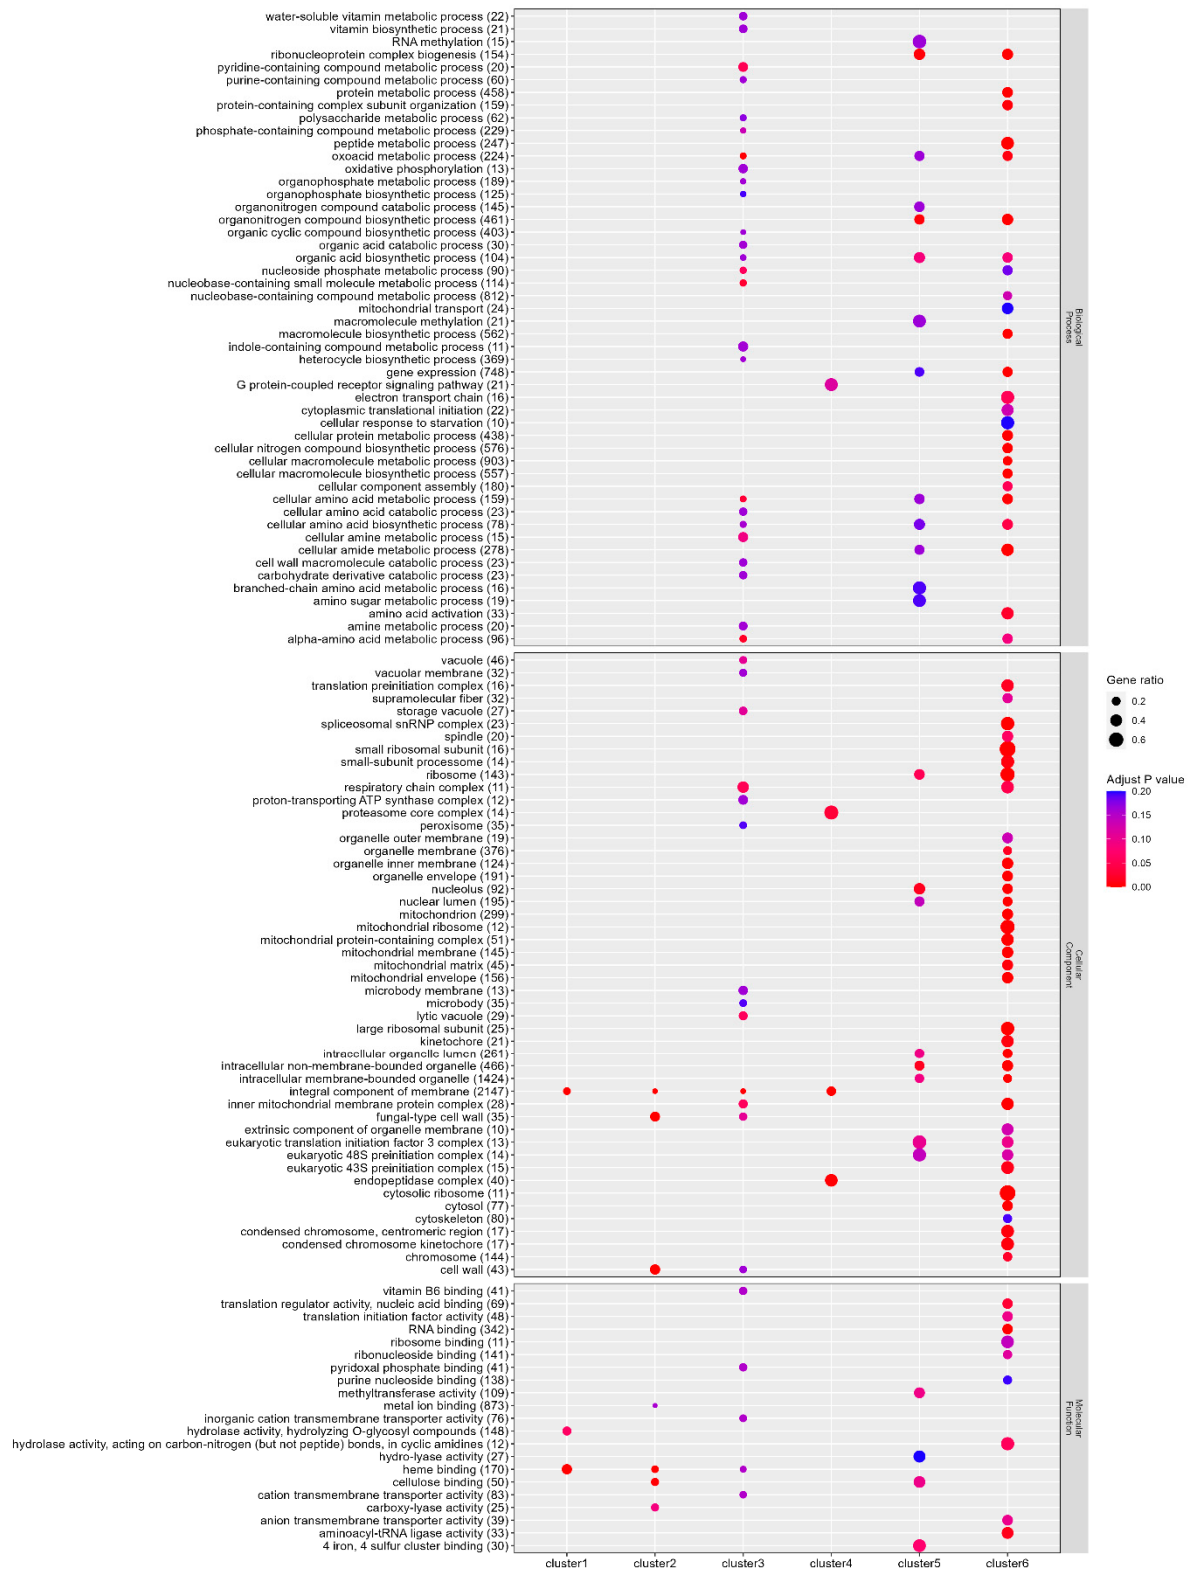

Figure S6. GO enrichment analysis on gene clusters. Numbers of genes annotated to specific GO term are listed beside the term. Gene ratio is calculated by annotated genes of specific GO term in each cluster over annotated genes of specific GO term in the genome background. Terms are filtered to GO level 5. Enriched groups with Benjamini and Hochberg method (BH) adjusted p value  $\leq 0.20$  are coloured red to blue.

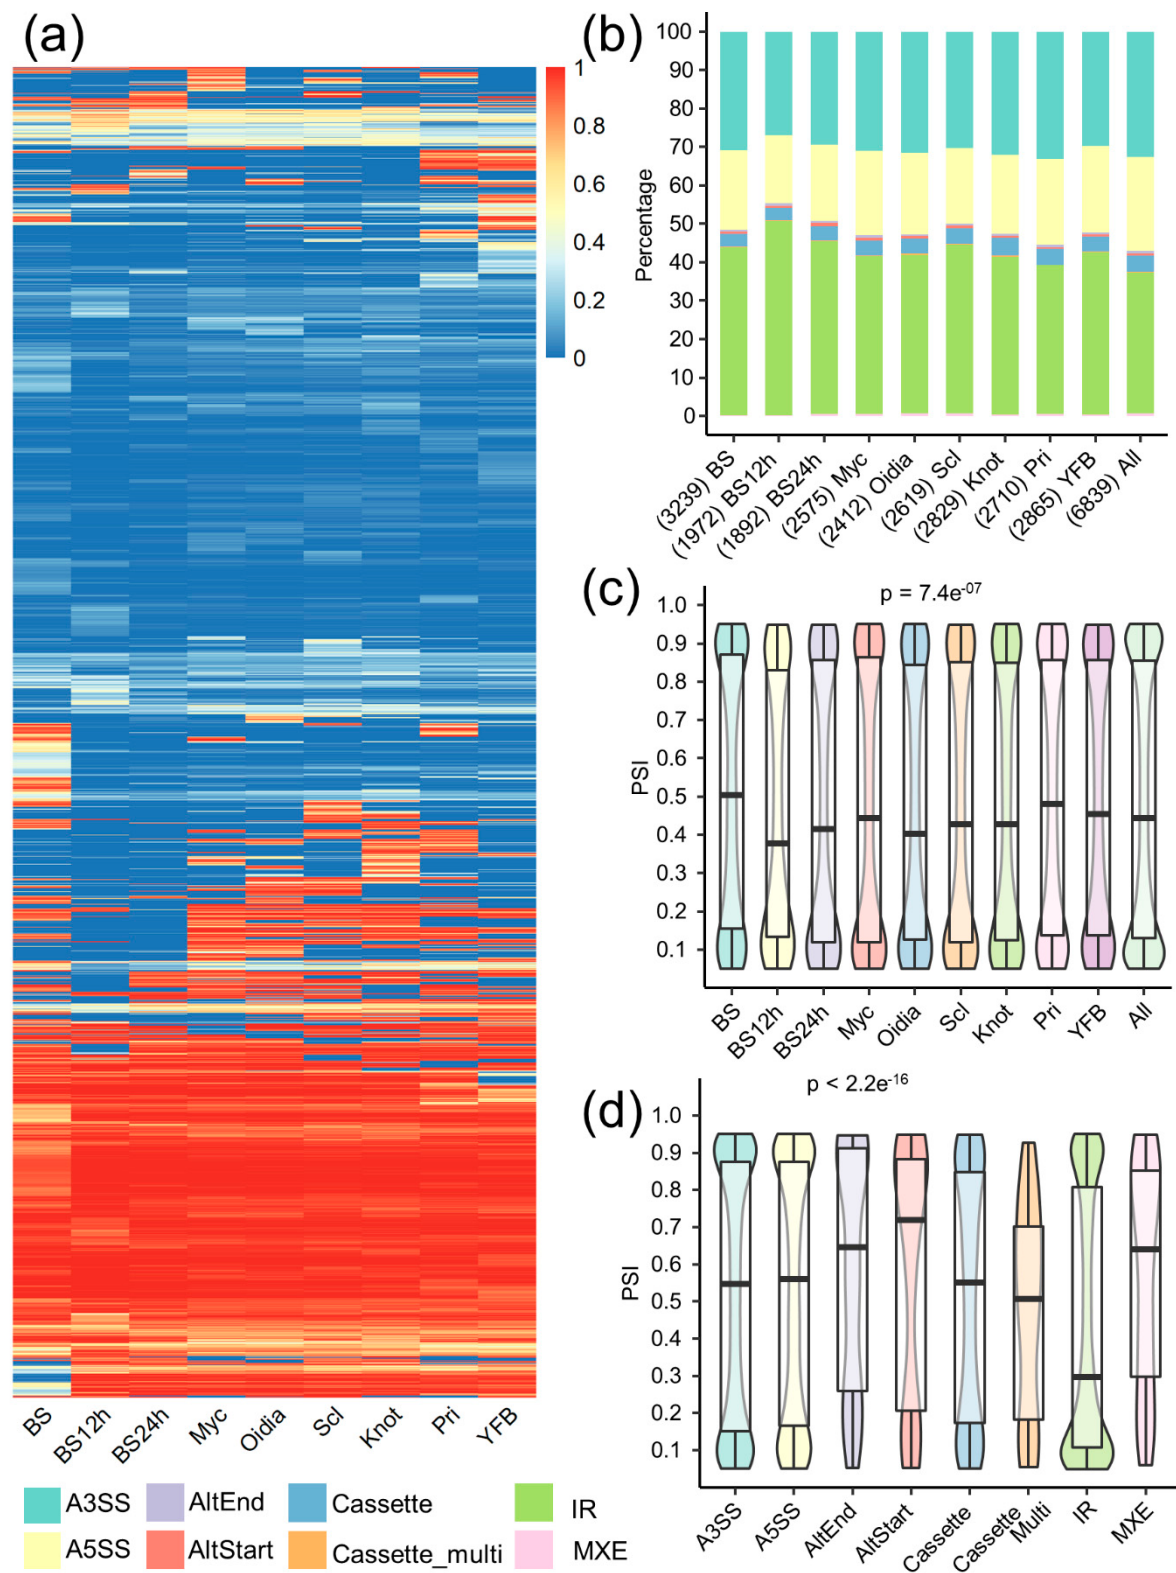

Figure S7. PSI score of AS events identified in nine developmental stages. (a) Heatmap showing the PSI score; (b) Distribution of eight AS types in nine stages; (c) PSI score of different stages, statistical results were detailed in table S5; (d) Violin plot summarising the PSI score of each AS types.

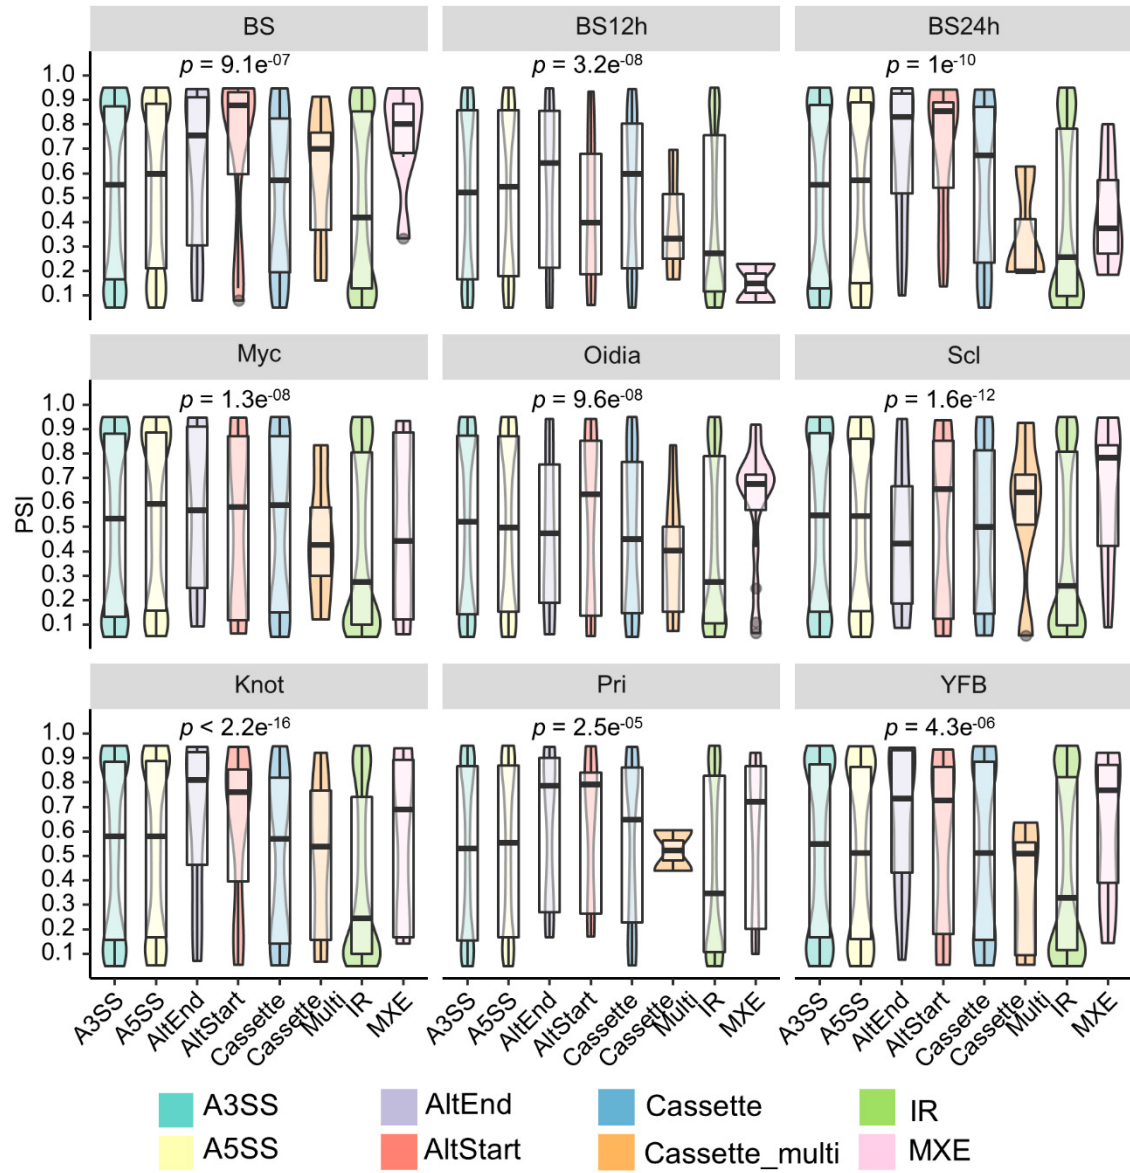

Figure S8. PSI score of eight AS types in nine developmental stages.

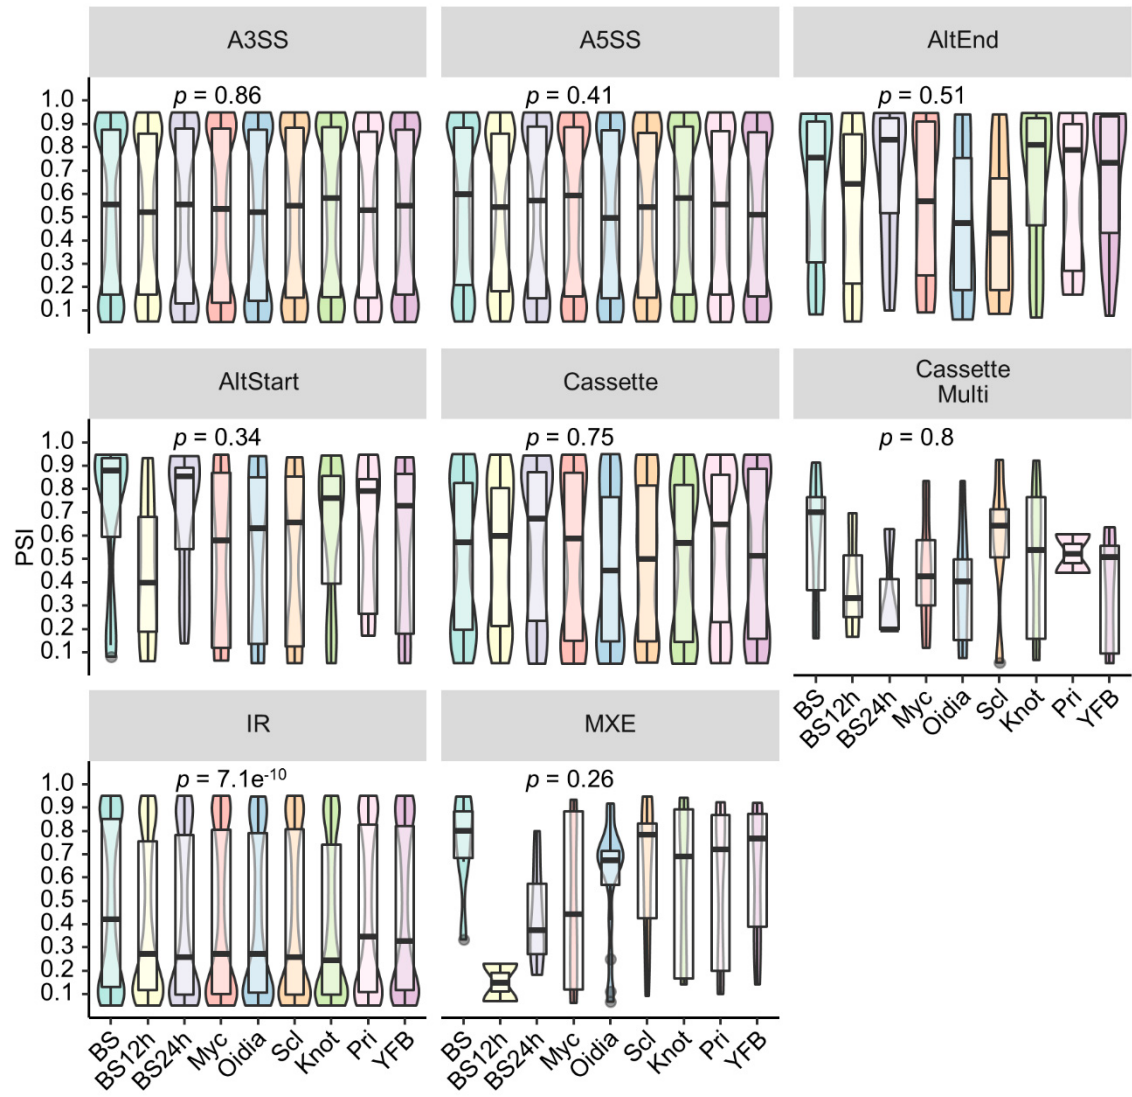

Figure S9. PSI score of nine developmental stages in eight AS types.

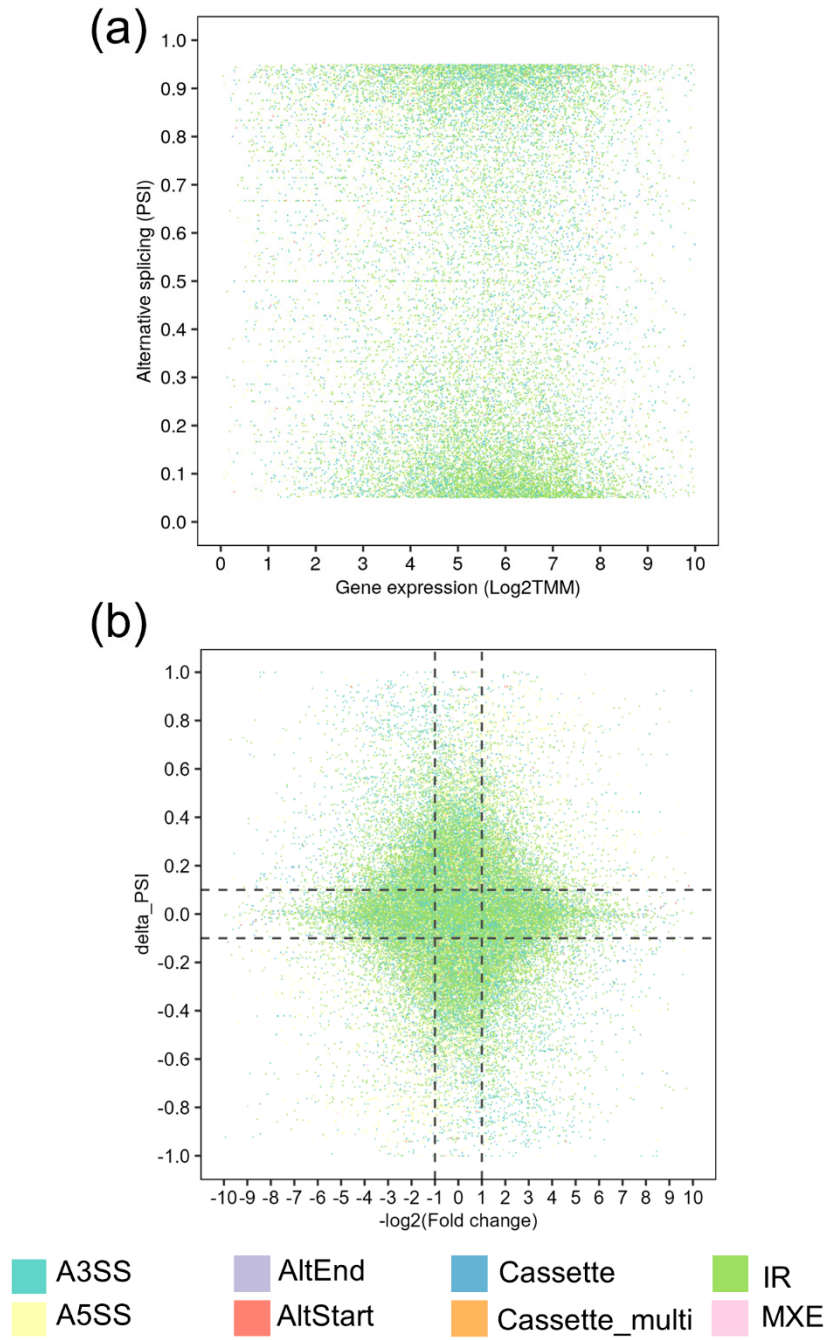

Figure S10. Quantitative relation of gene expression and PSI value of alternatively spliced genes. (a) Scatter plot on gene expression levels and PSI scores; (b) Scatter plot on changes of gene expression levels and PSI scores.

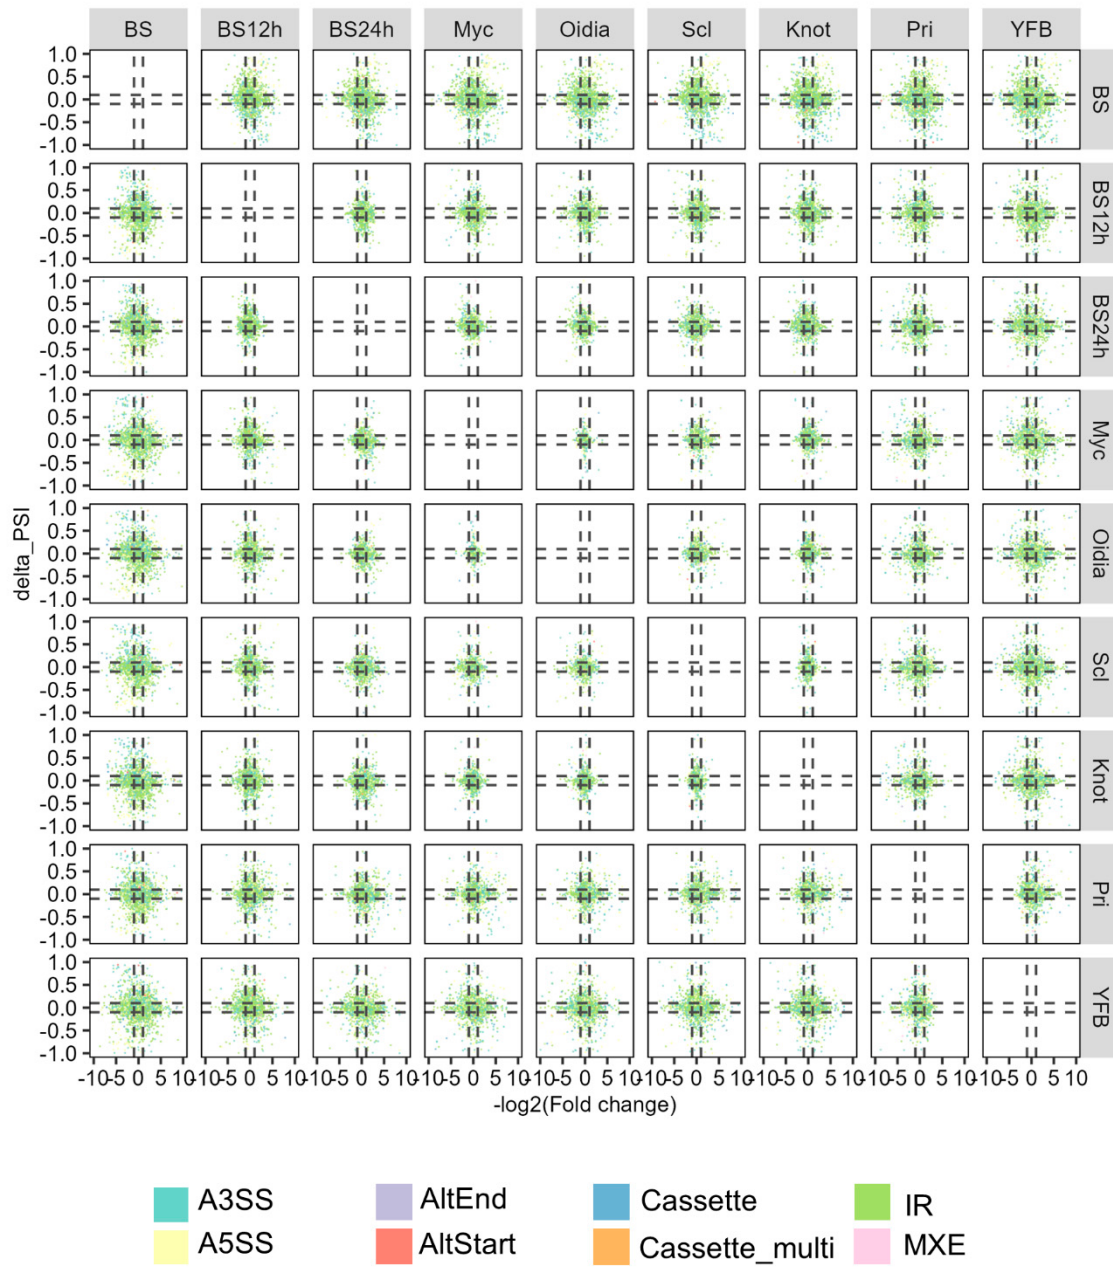

Figure S11. Scatter plots showing the changes on expression levels of alternative spliced genes and their PSI scores. Sample of each column were compared against sample of each row.

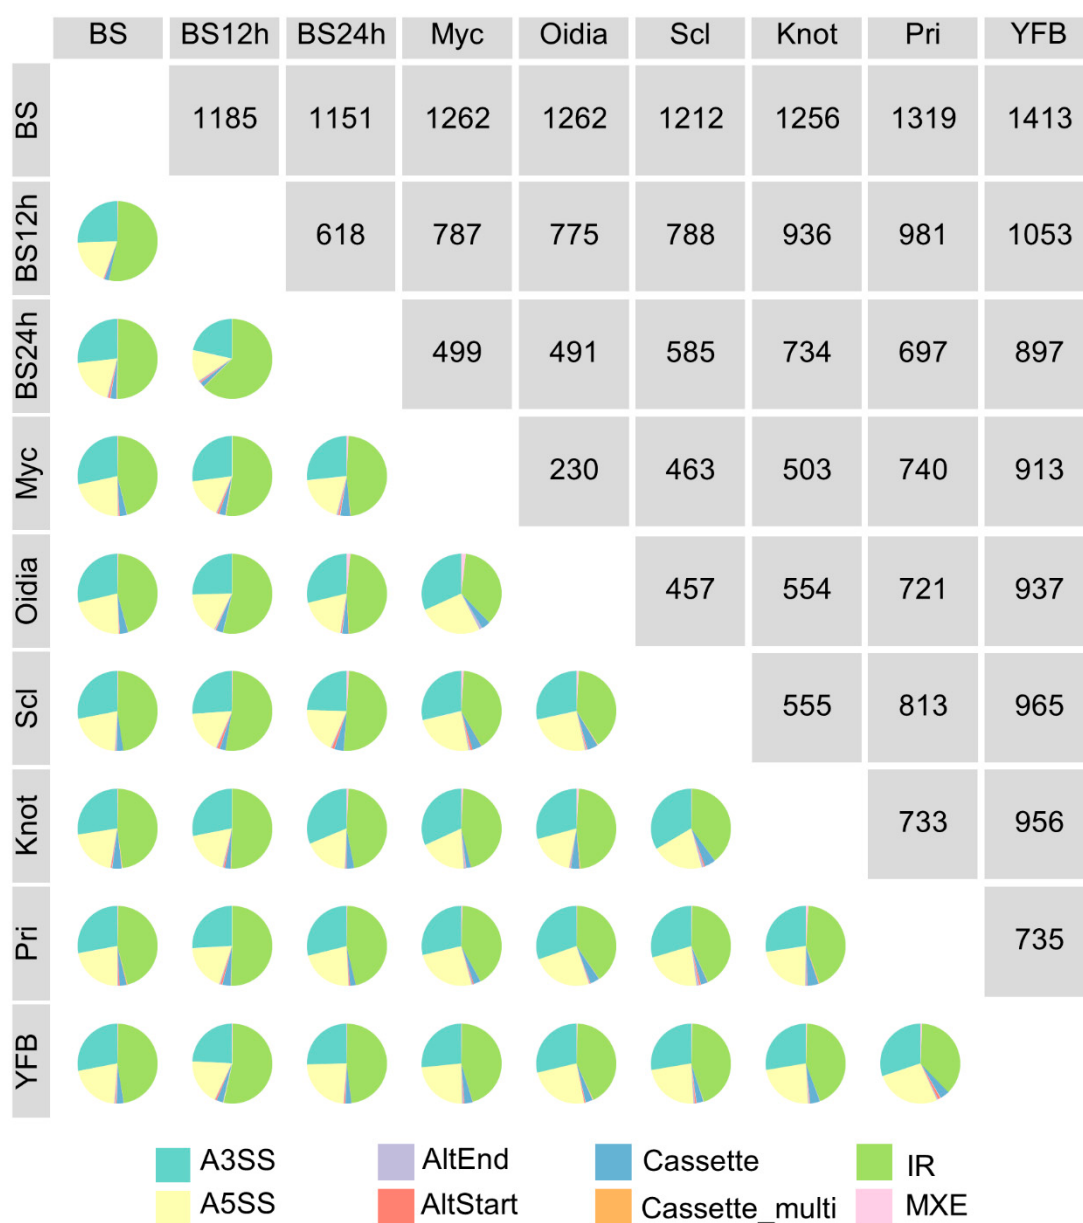

Figure S12. Summary on differentially spliced events between stages. Right upper triangle indicated the number of differentially spliced regions, left lower triangle showed the proportion of AS types.

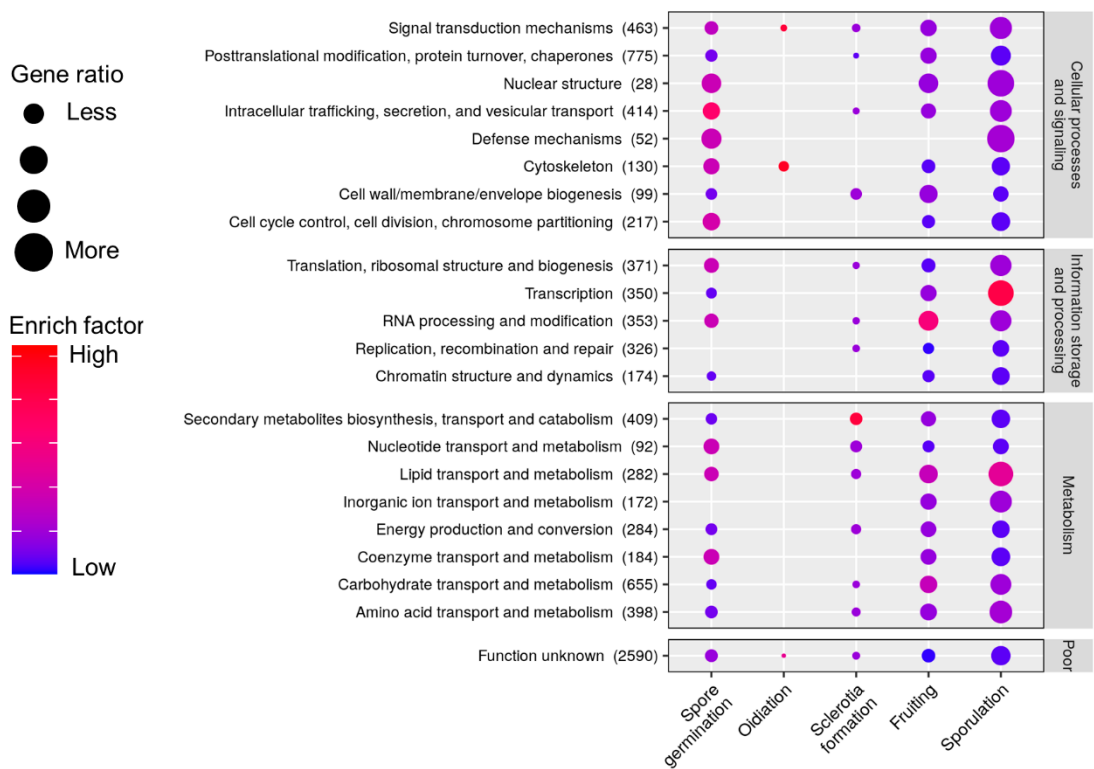

Figure S13. KOG annotation on developmentally regulated alternative splicing specific to the developmental process.

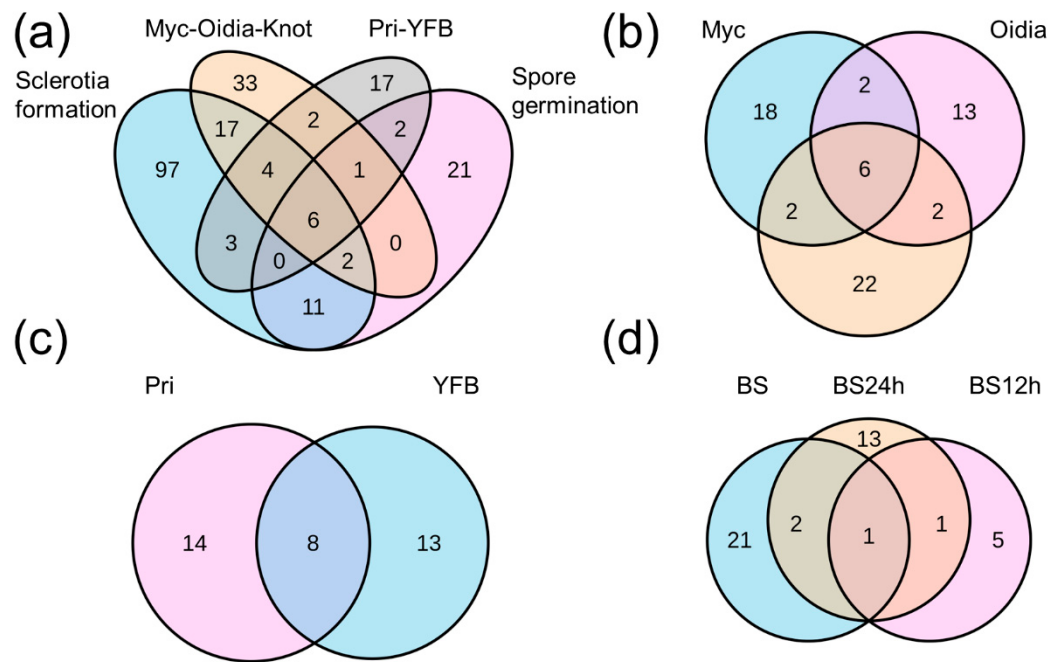

Figure S14. Common RNA editing sites among different stages. (a) Shared RNA editing sites among four major clades; (b) Vegetative mycelia, oidia forming mycelia, mycelia with hyphal knots; (c) Primordia and young fruiting bodies; (d) Spore germination.

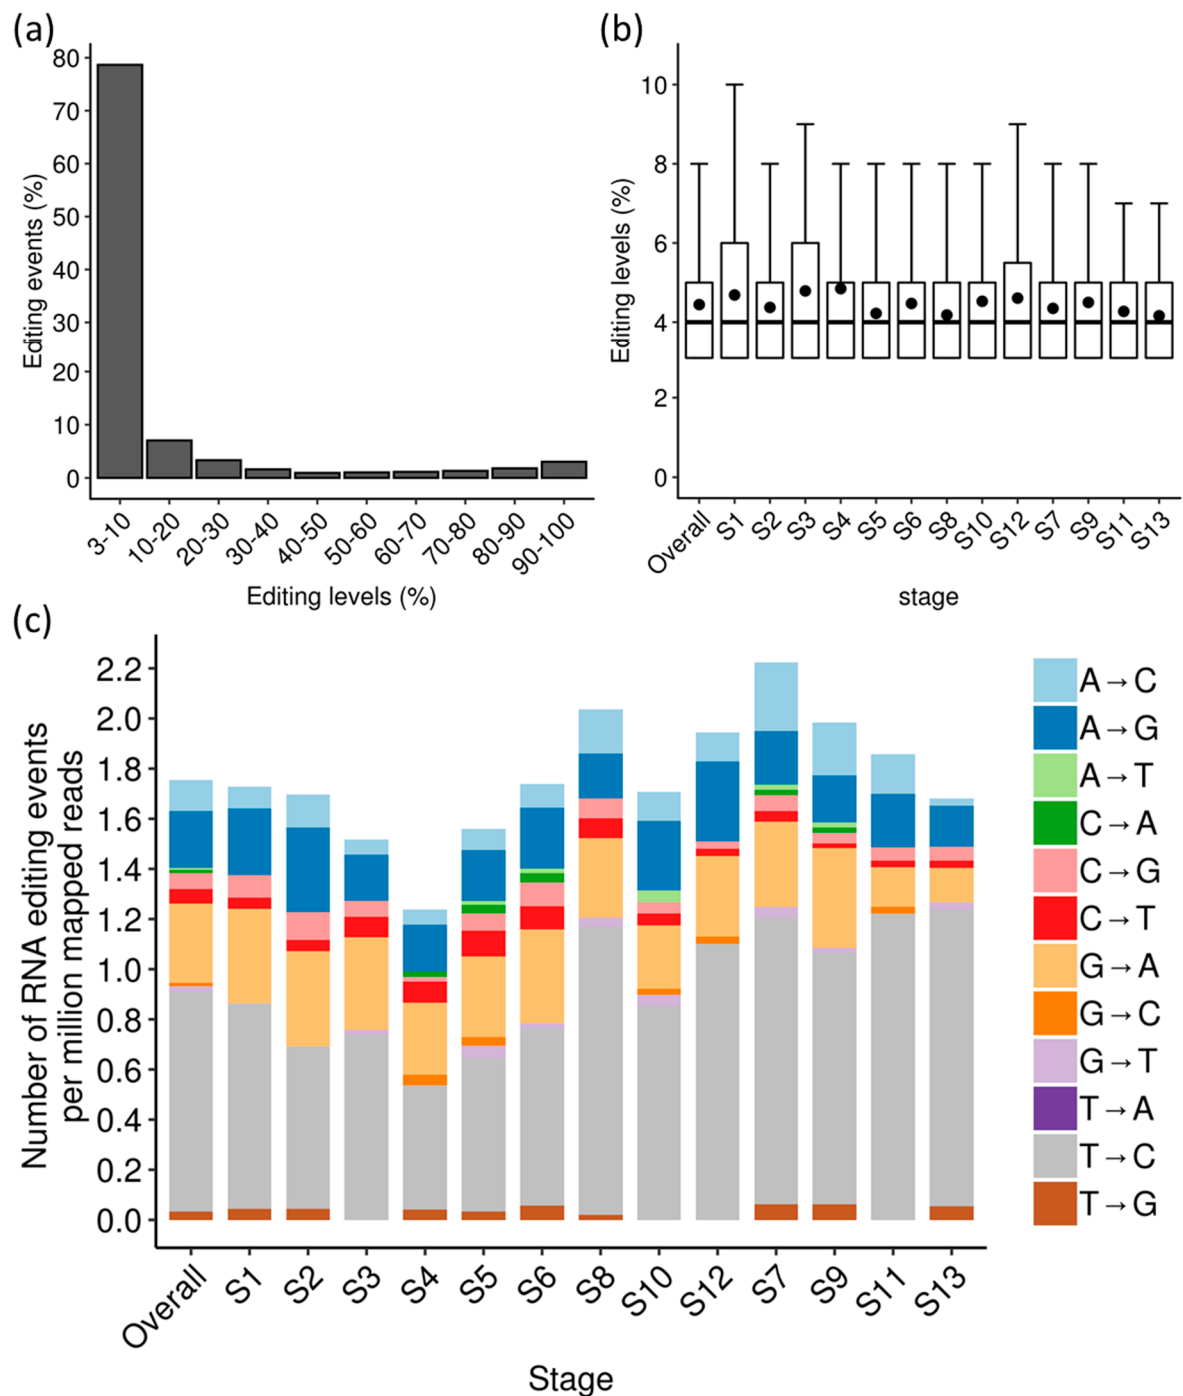

Figure S15. Statistics on RNA editing sites identified from Muraguchi et al. (2015). (a) Histogram showing editing the frequency of 1050 RNA editing events. (b) Box plots showing RNA editing levels of RNA editing events in different stages/tissues. (c) The number of each type of RNA editing events per million mapped reads in different developmental stages. Sequencing data was summarised in Table S10.

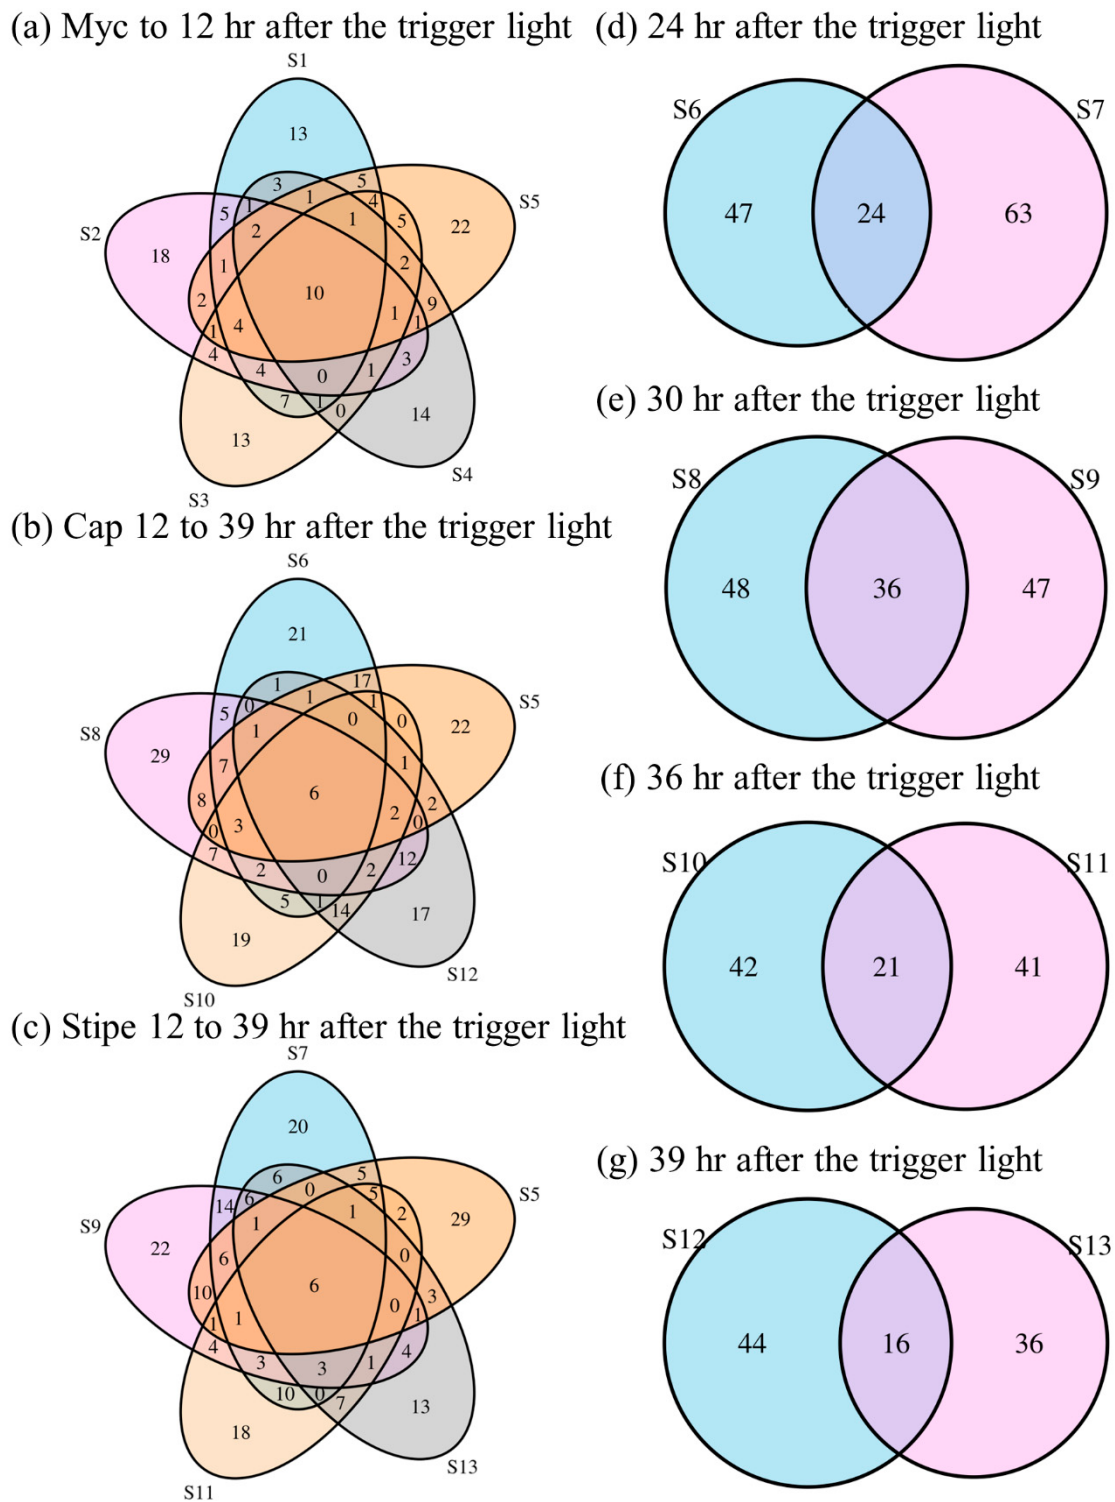

Figure S16. Common RNA editing sites identified from transcriptome data generated by Muraguchi et al. (2015). (a) Vegetative mycelium to fruiting body primordia 12 h; (b) Cap of fruiting body from 12 h to 39 h; (c) Stipe of fruiting body from 12 h to 39 h; (d-g) fruiting body, 24 h/30 h/36 h/39 h after the light triggering.

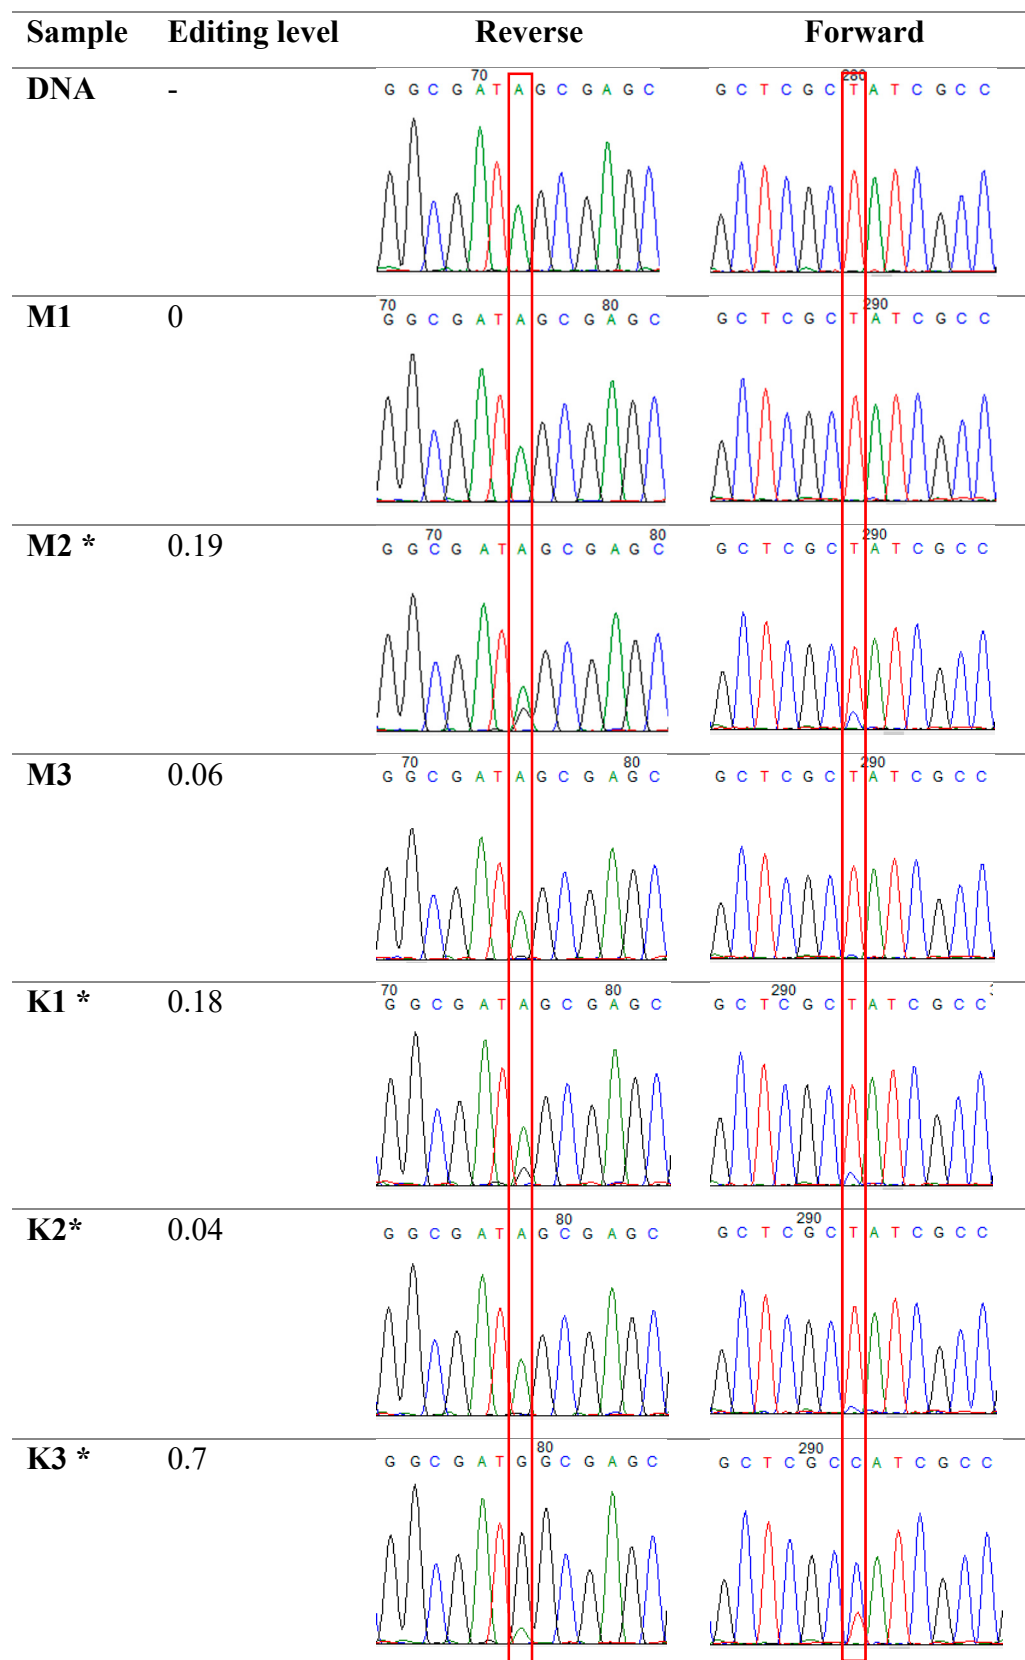

Figure S17. Validation of RNA editing on hypothetical protein (CC2G\_003350, scaffold\_11: 1716350U>C).

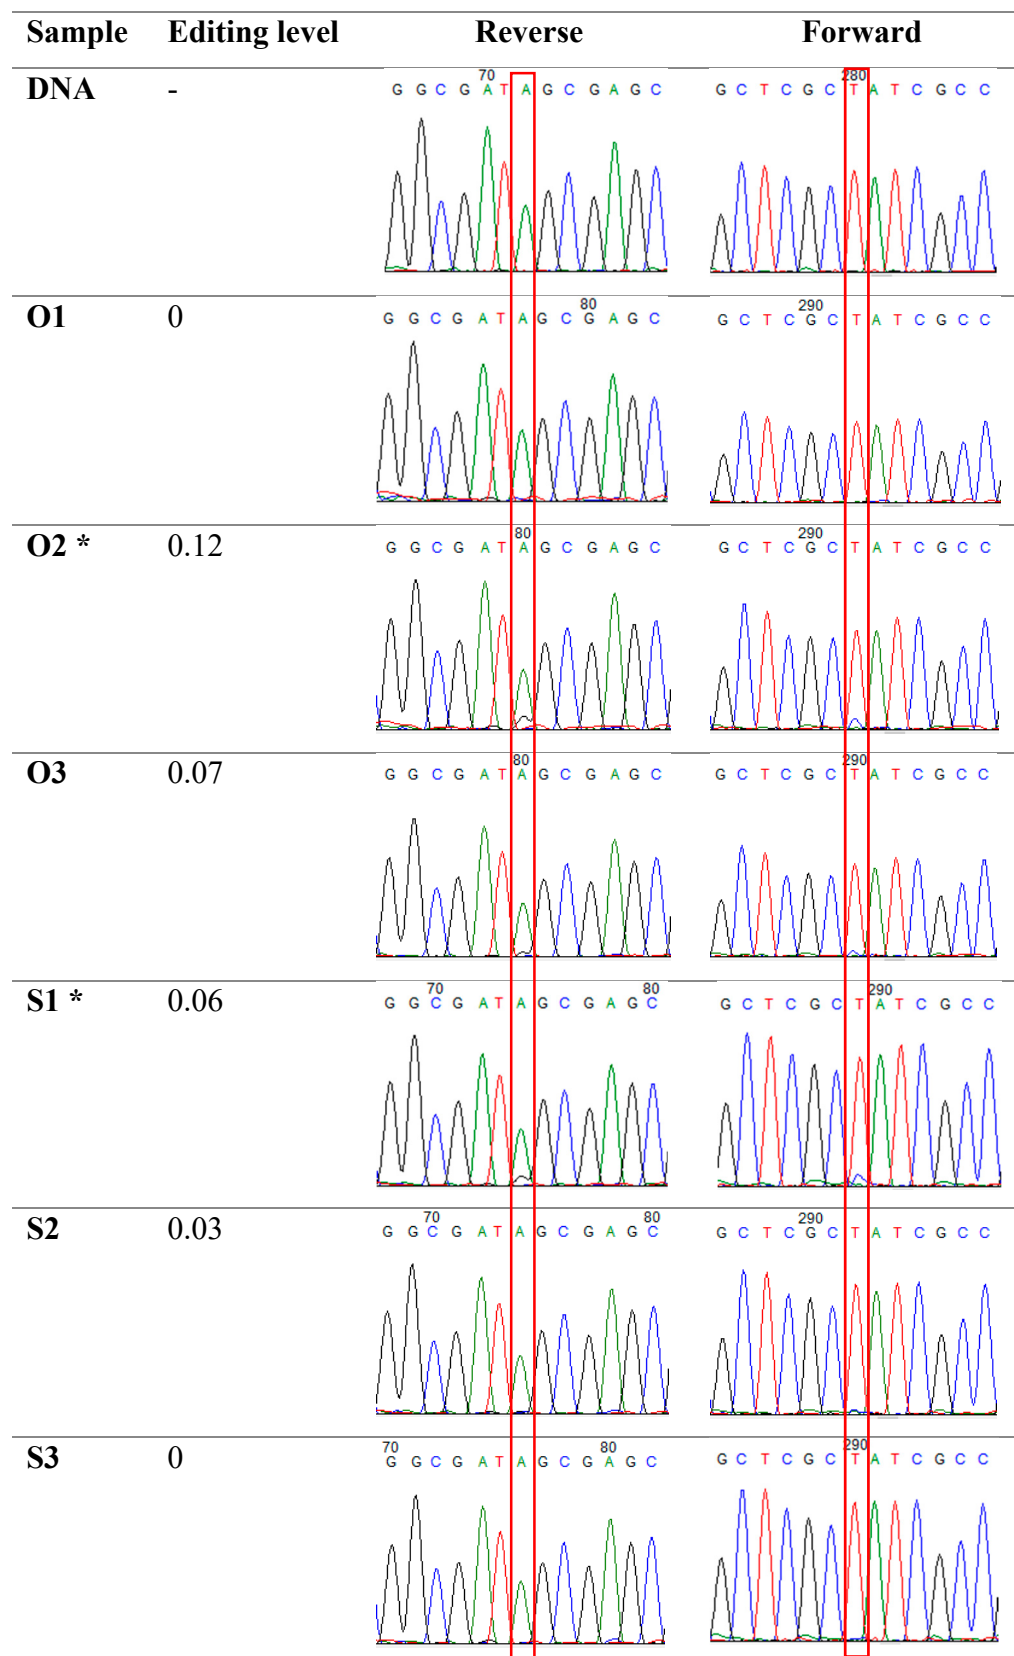

Figure S17. Validation of RNA editing on hypothetical protein (CC2G\_003350, scaffold\_11: 1716350U>C), continued.

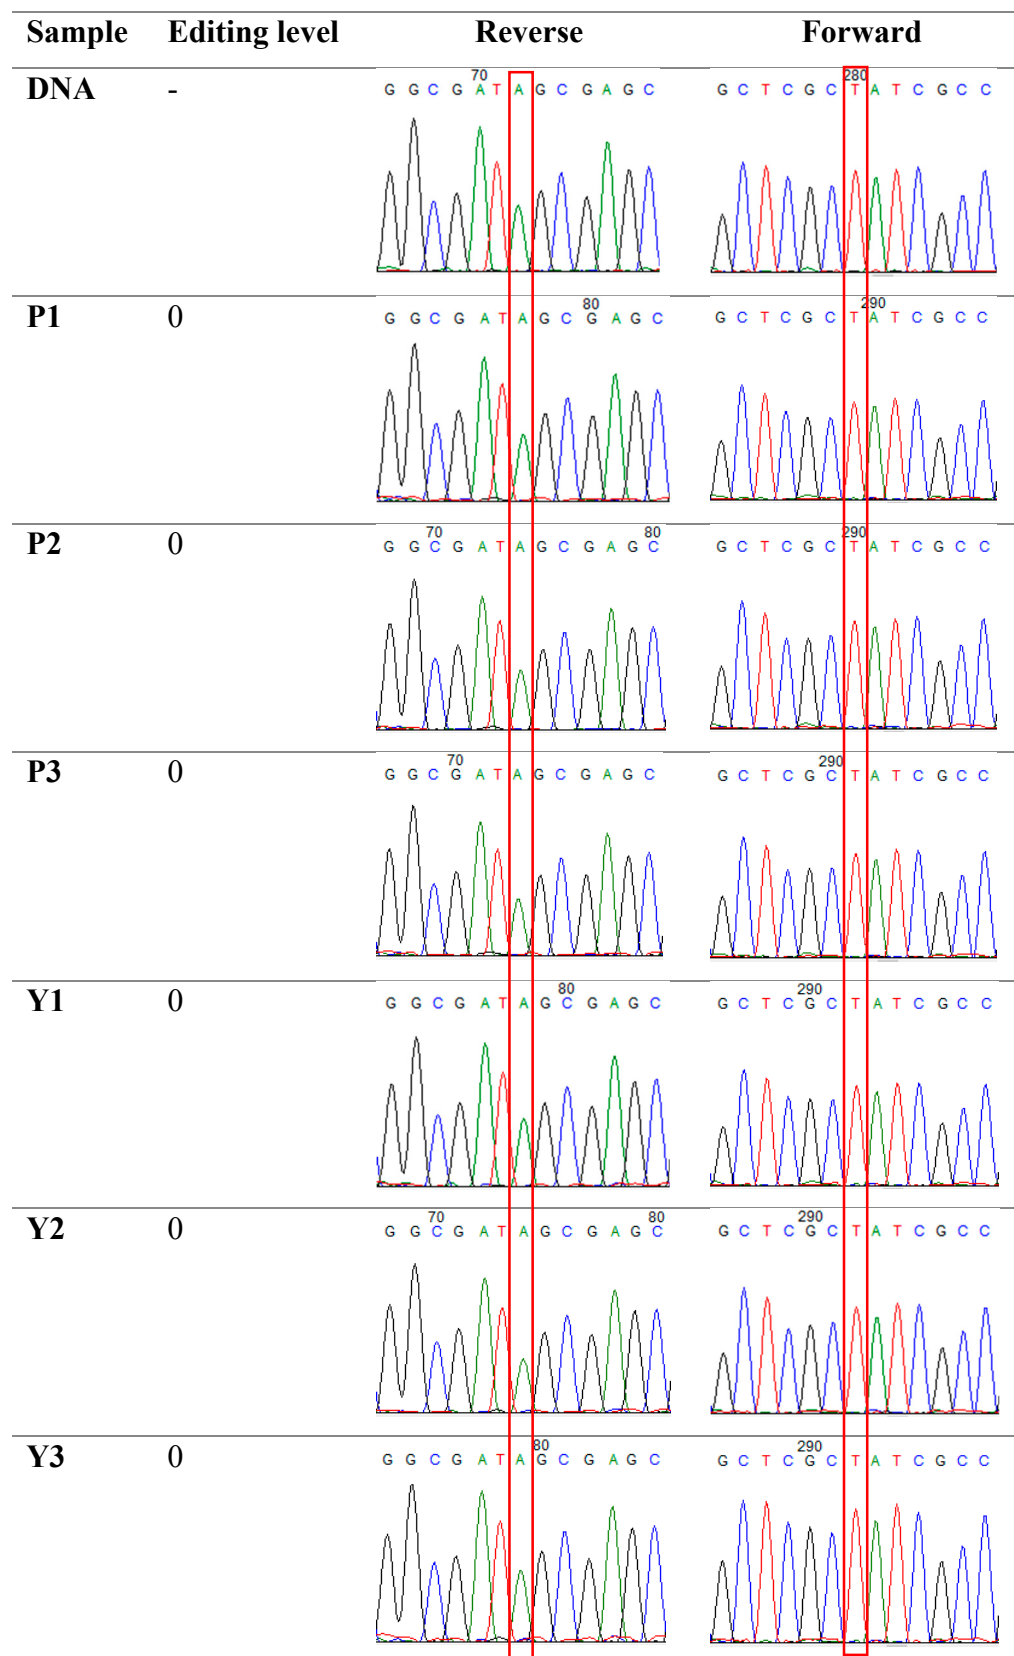

Figure S17. Validation of RNA editing on hypothetical protein (CC2G\_003350, scaffold\_11: 1716350U>C), continued.

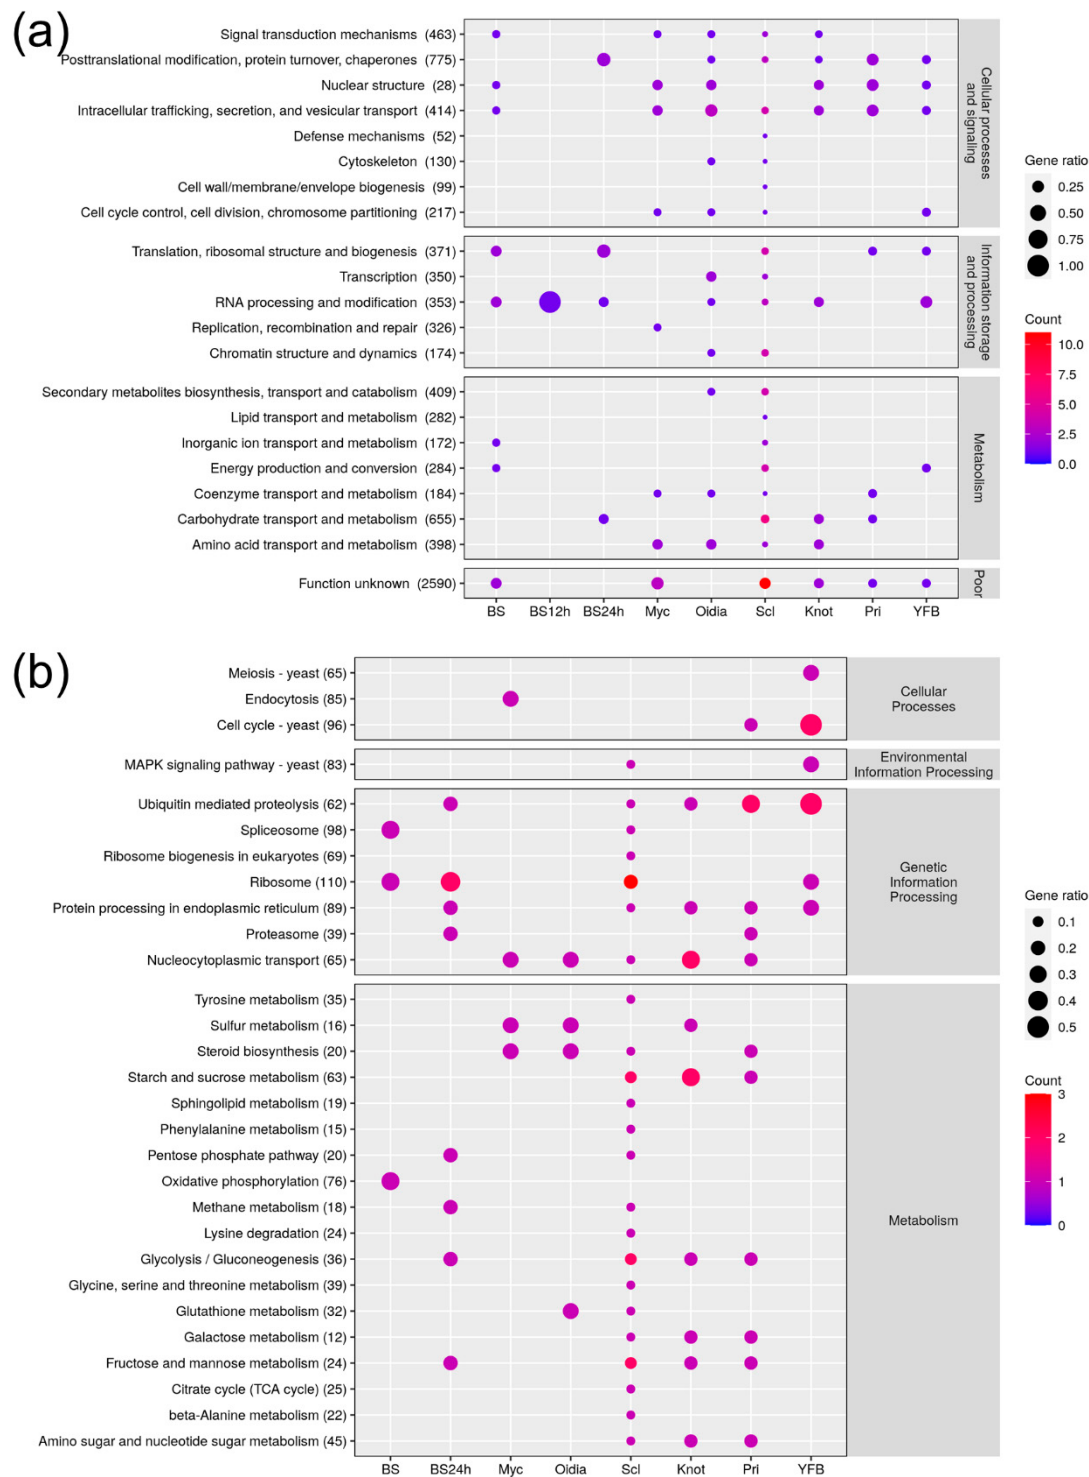

Figure S18. Functional annotation of genes with RNA editing. Gene ratio is calculated by annotated genes of specific functional term in each stage over annotated genes of each stage in the genome background. (a) KOG term annotation; (b) KEGG pathway annotation.

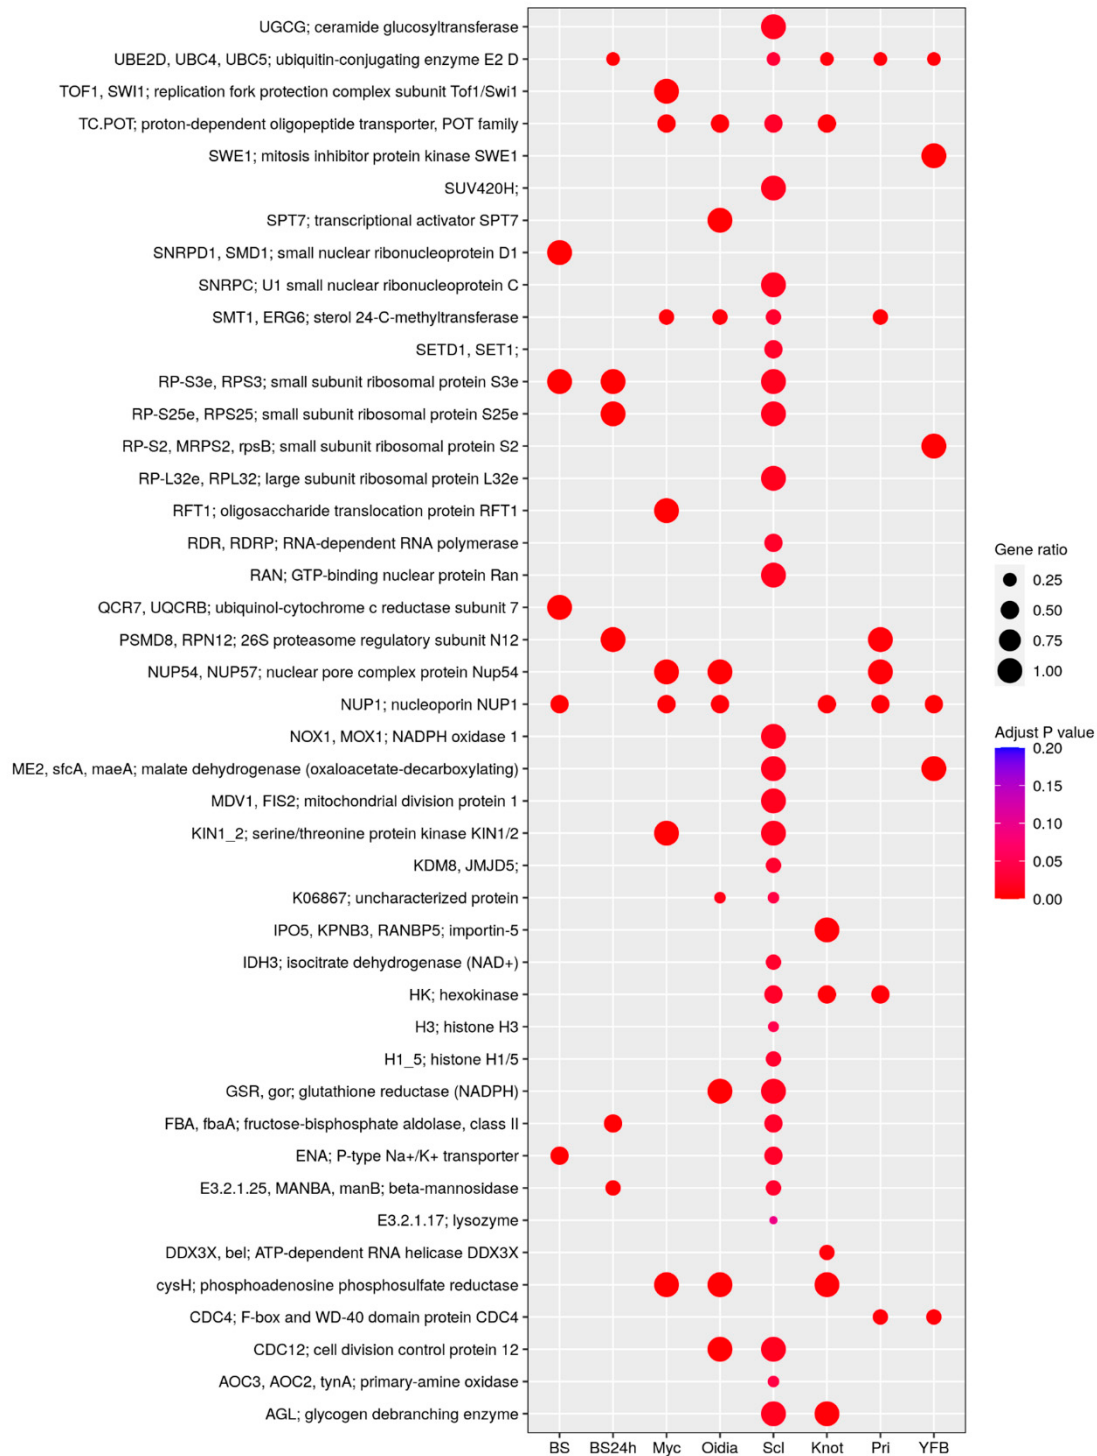

Figure S19. KO annotation of genes with RNA editing. Gene ratio is calculated by annotated genes of specific KO term in each stage over annotated genes of specific KO term in the genome background. Enriched groups with Benjamini and Hochberg method (BH) adjusted p value  $\leq 0.20$  are coloured red to blue.

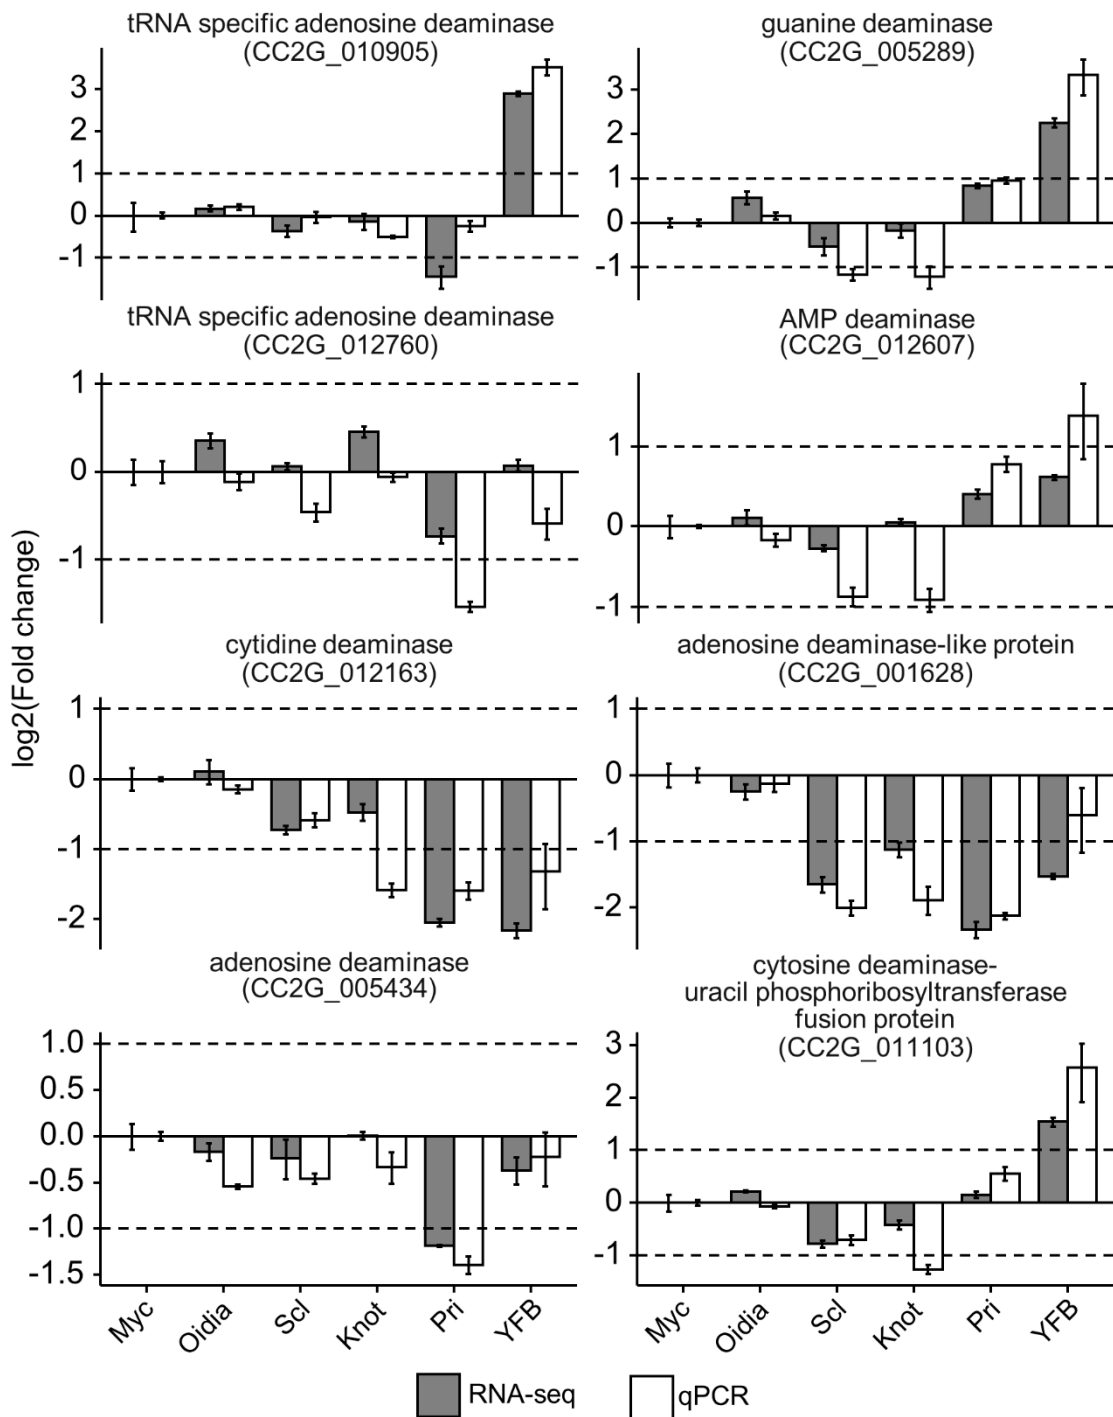

Figure S20. Expression levels of nucleoside deaminase annotated in *C. cinerea*. Expression fold changes are compared to vegetative mycelia (Myc).
